# Supplementary material for: Siloxane-containing derivatives of benzoic acid: chemical transformation of the carboxyl group
Source: Royal Society of Chemistry journal article supplement (doi:10.1039/d2nj03872b), 2022-01-01

## SUPPORTING INFORMATION

### **Siloxane-Containing Derivatives of Benzoic Acid: Chemical Transformation of the Carboxyl Group.**

#### **Supp.Inf.2: NMR, ESI HRMS and IR spectra for 3aa-ap**

Irina K. Goncharova,<sup>\*a,b</sup> Eva A. Ulianova,<sup>a,c</sup> Roman A. Novikov,<sup>d</sup> Alexander D. Volodin,<sup>a</sup> Alexander A. Korlyukov,<sup>a</sup> Ashot V. Arzumanyan<sup>\*a,b</sup>

#### AUTHOR ADDRESS

<sup>a</sup> A. N. Nesmeyanov Institute of Organoelement Compounds, Russian Academy of Sciences, 28 Vavilov St., Moscow 119991, Russian Federation

<sup>b</sup> A.V. Topchiev Institute of Petrochemical Synthesis, Russian Academy of Sciences, 119991 Moscow, Russian Federation

<sup>c</sup> HZ University of Applied Sciences, 4382 NW Middelburg, The Netherlands

<sup>d</sup> N.D. Zelinsky Institute of Organic Chemistry, Russian Academy of Sciences, 119991 Moscow, Russian Federation

S2

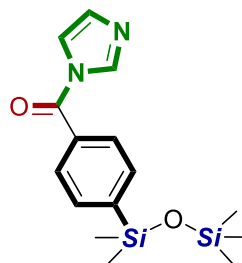

**Characterisation data for (1H-imidazol-1-yl)(4-(1,1,3,3,3-pentamethyldisiloxanyl)phenyl)methanone:**

$^1\text{H}$  NMR (400 MHz, DMSO- $d_6$ ):  $\delta = 8.08$  (s, 1H),  $\delta = 7.77$ -7.70 (m, 4H),  $\delta = 7.55$  (m, 1H),  $\delta = 7.16$  (m, 1H),  $\delta = 0.36$  (s, 6H),  $\delta = 0.11$  (s, 9H).  $^{13}\text{C}$  NMR (100 MHz, DMSO- $d_6$ ):  $\delta = 147.66$ , 138.32, 134.99, 133.50, 132.36, 130.99, 128.80, 118.16, 2.07, 0.91.  $^{29}\text{Si}$  NMR (80 MHz, DMSO- $d_6$ ):  $\delta = 9.94$ , -2.77.  $^{15}\text{N}$  NMR (40 MHz, DMSO):  $\delta = 266.48$ , 205.46.

<sup>1</sup>H NMR

(400 MHz, CDCl<sub>3</sub>)

S3

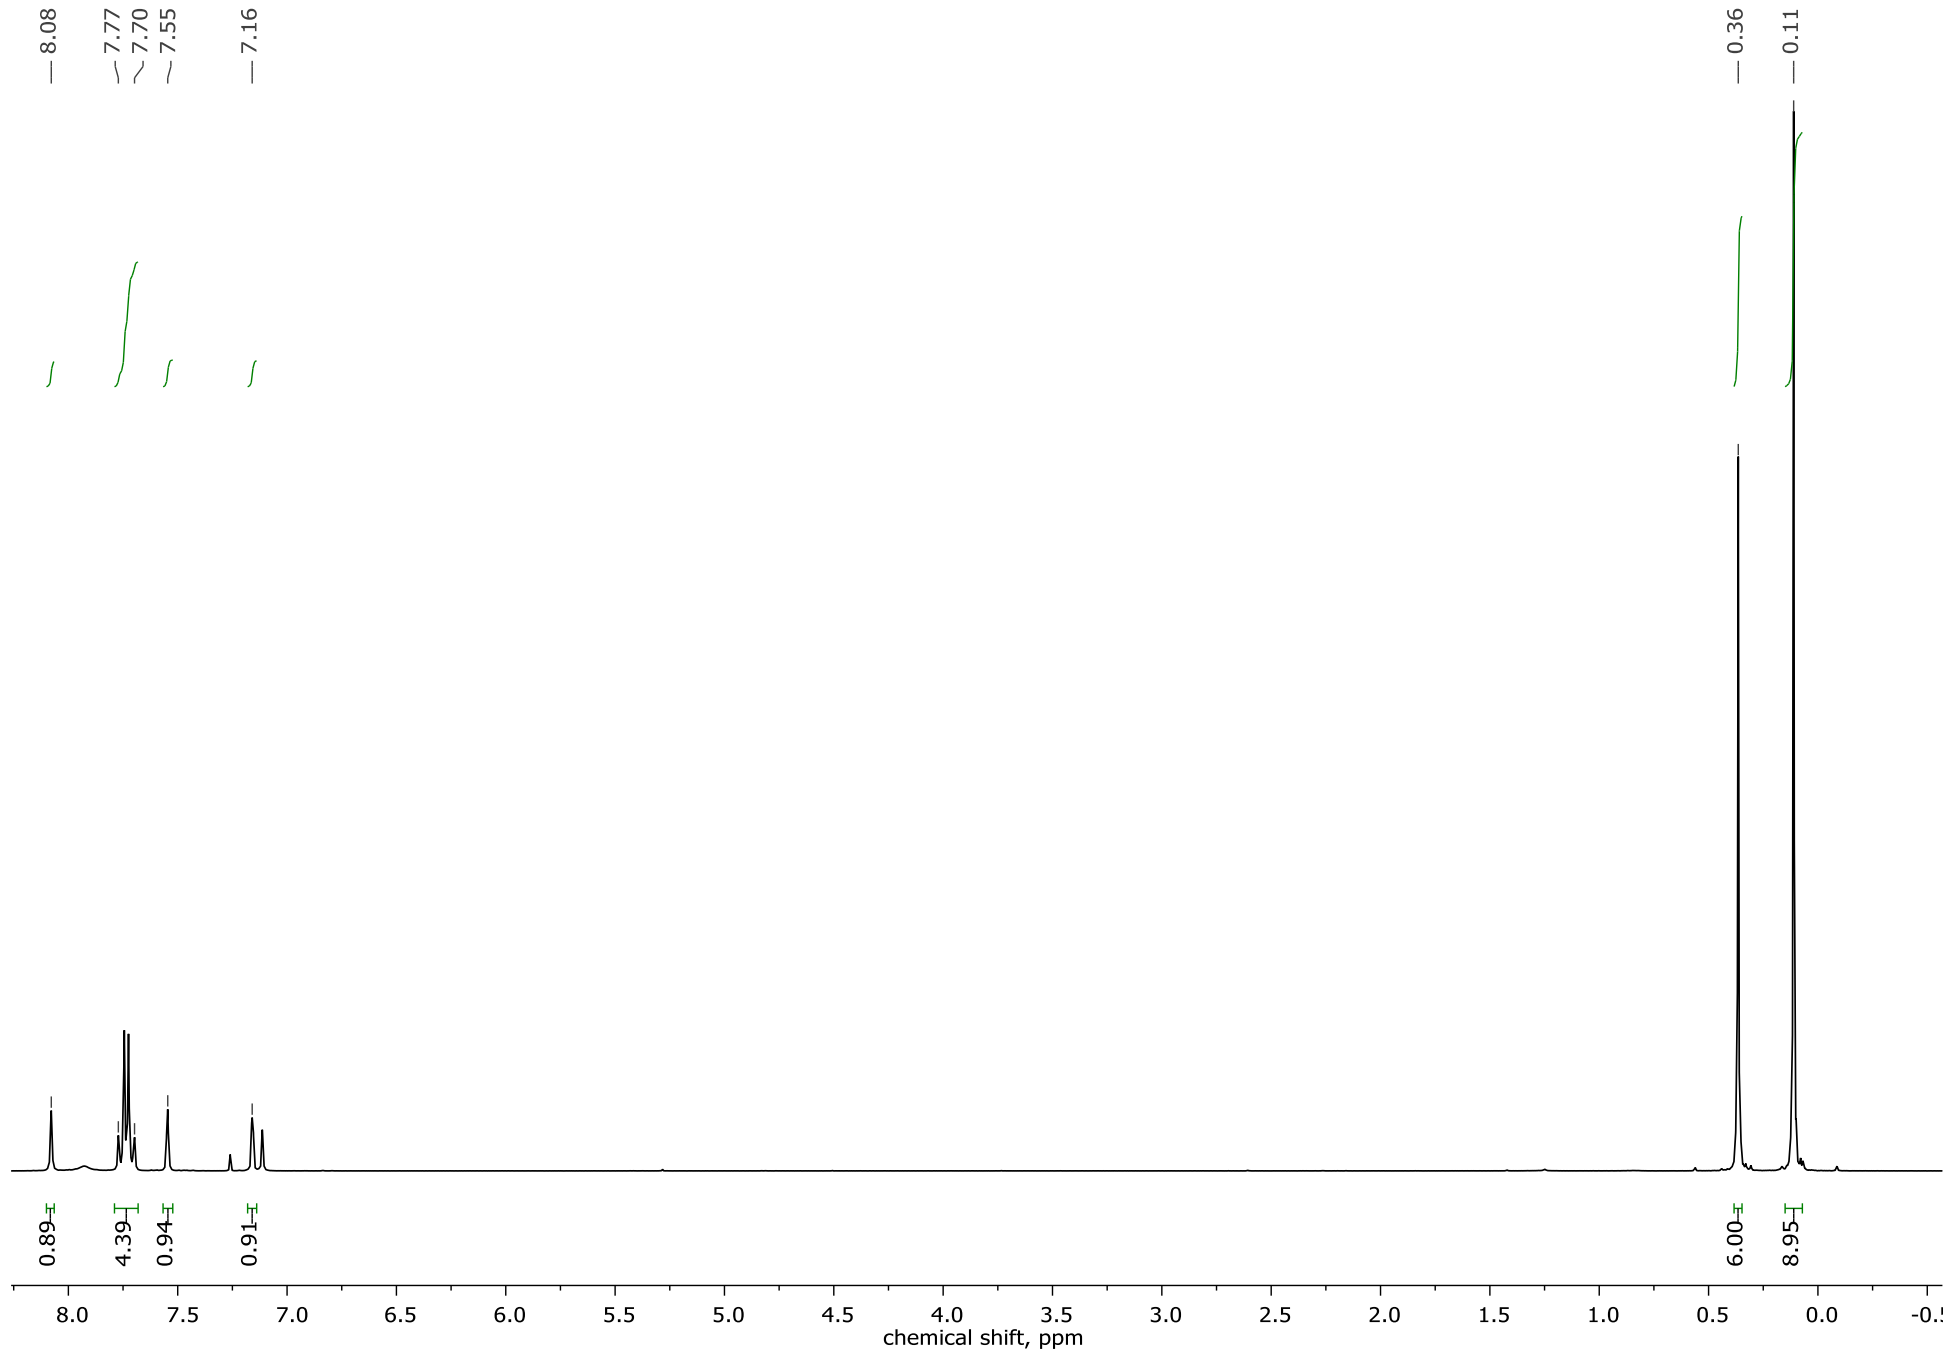

<sup>13</sup>C NMR

(100 MHz, CDCl<sub>3</sub>)

S4

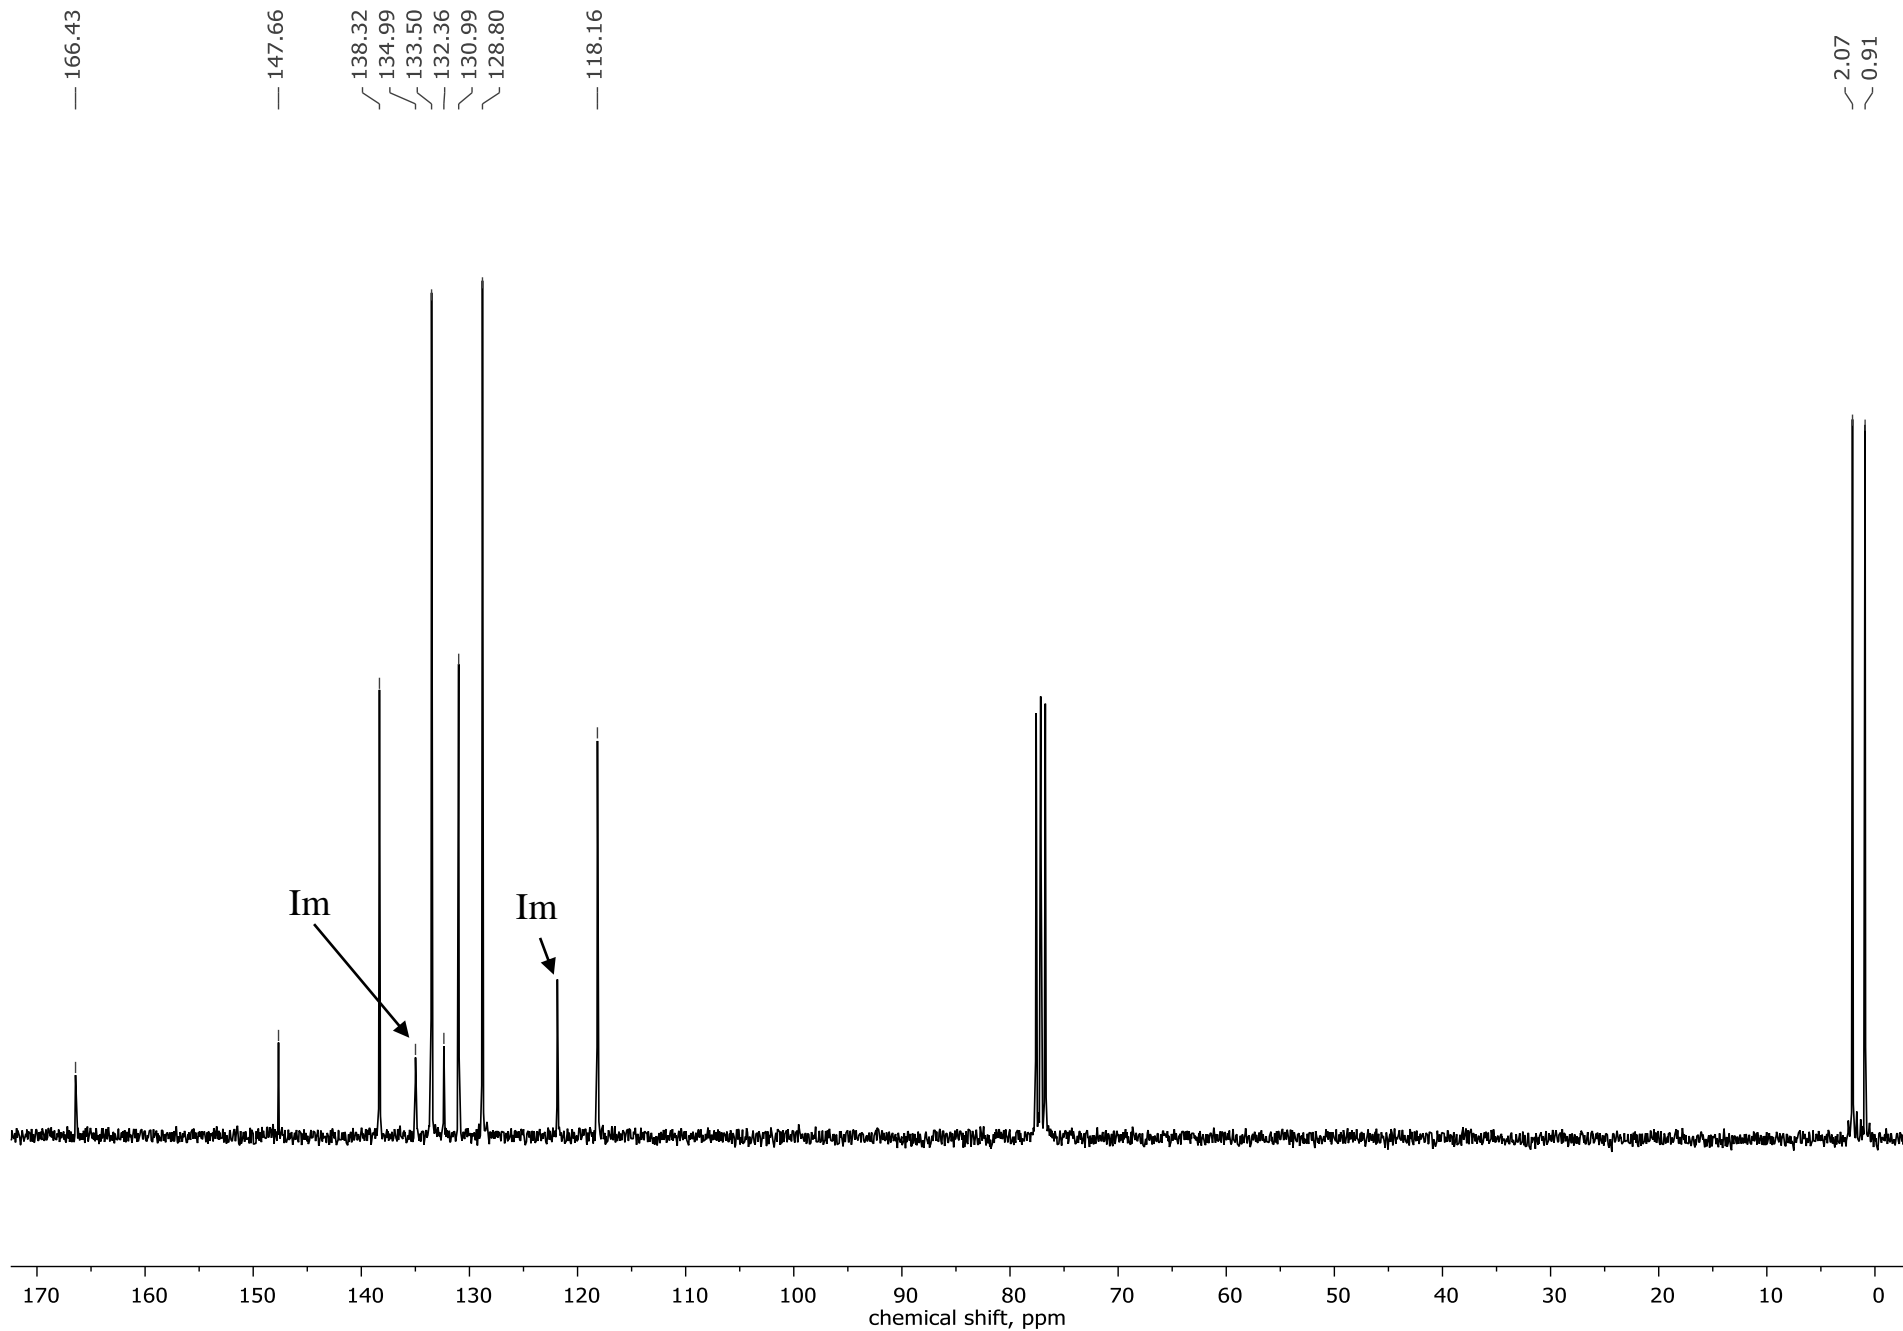

$^{29}\text{Si}$  NMR  
(80 MHz,  $\text{CDCl}_3$ )

S5

— 9.94

— -2.77

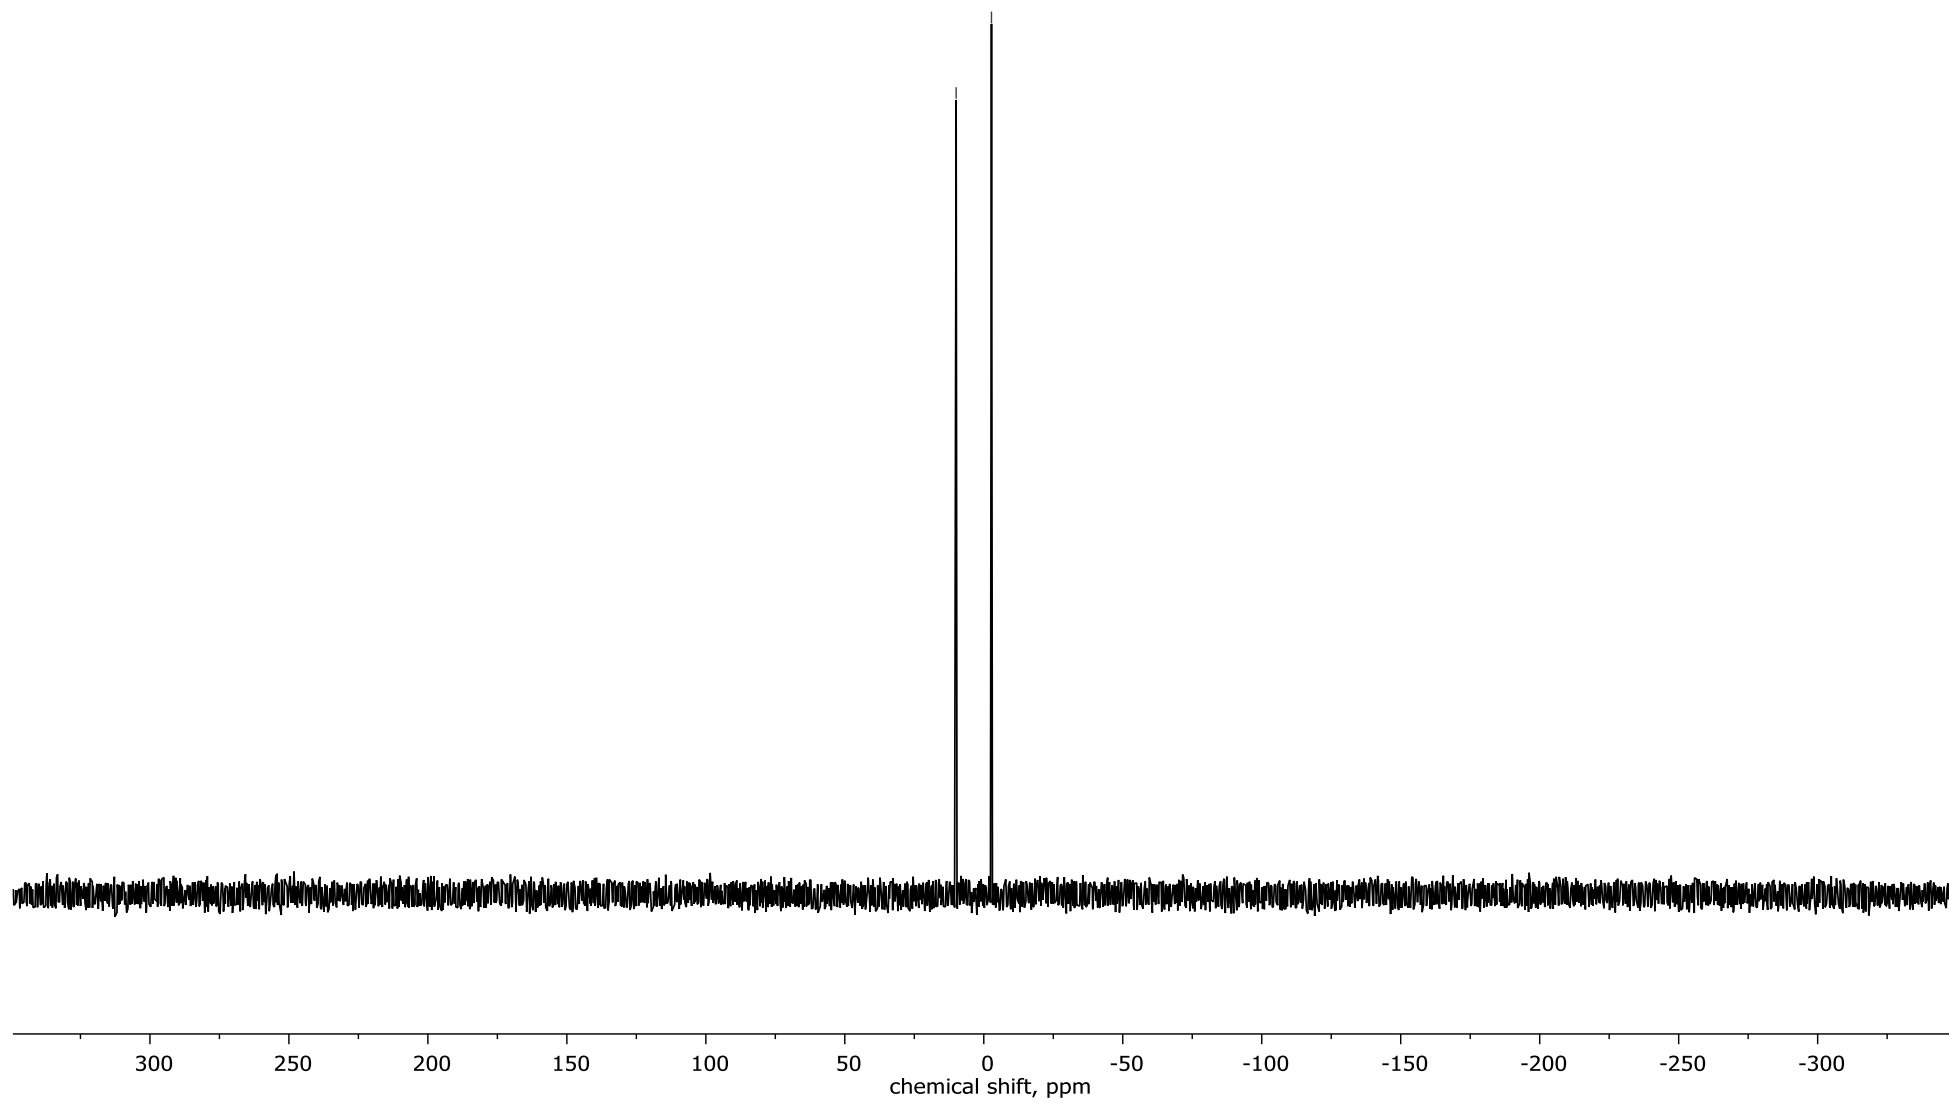

$^{15}\text{N}$  NMR (reconstructed,  
40 MHz,  $\text{CDCl}_3$ )

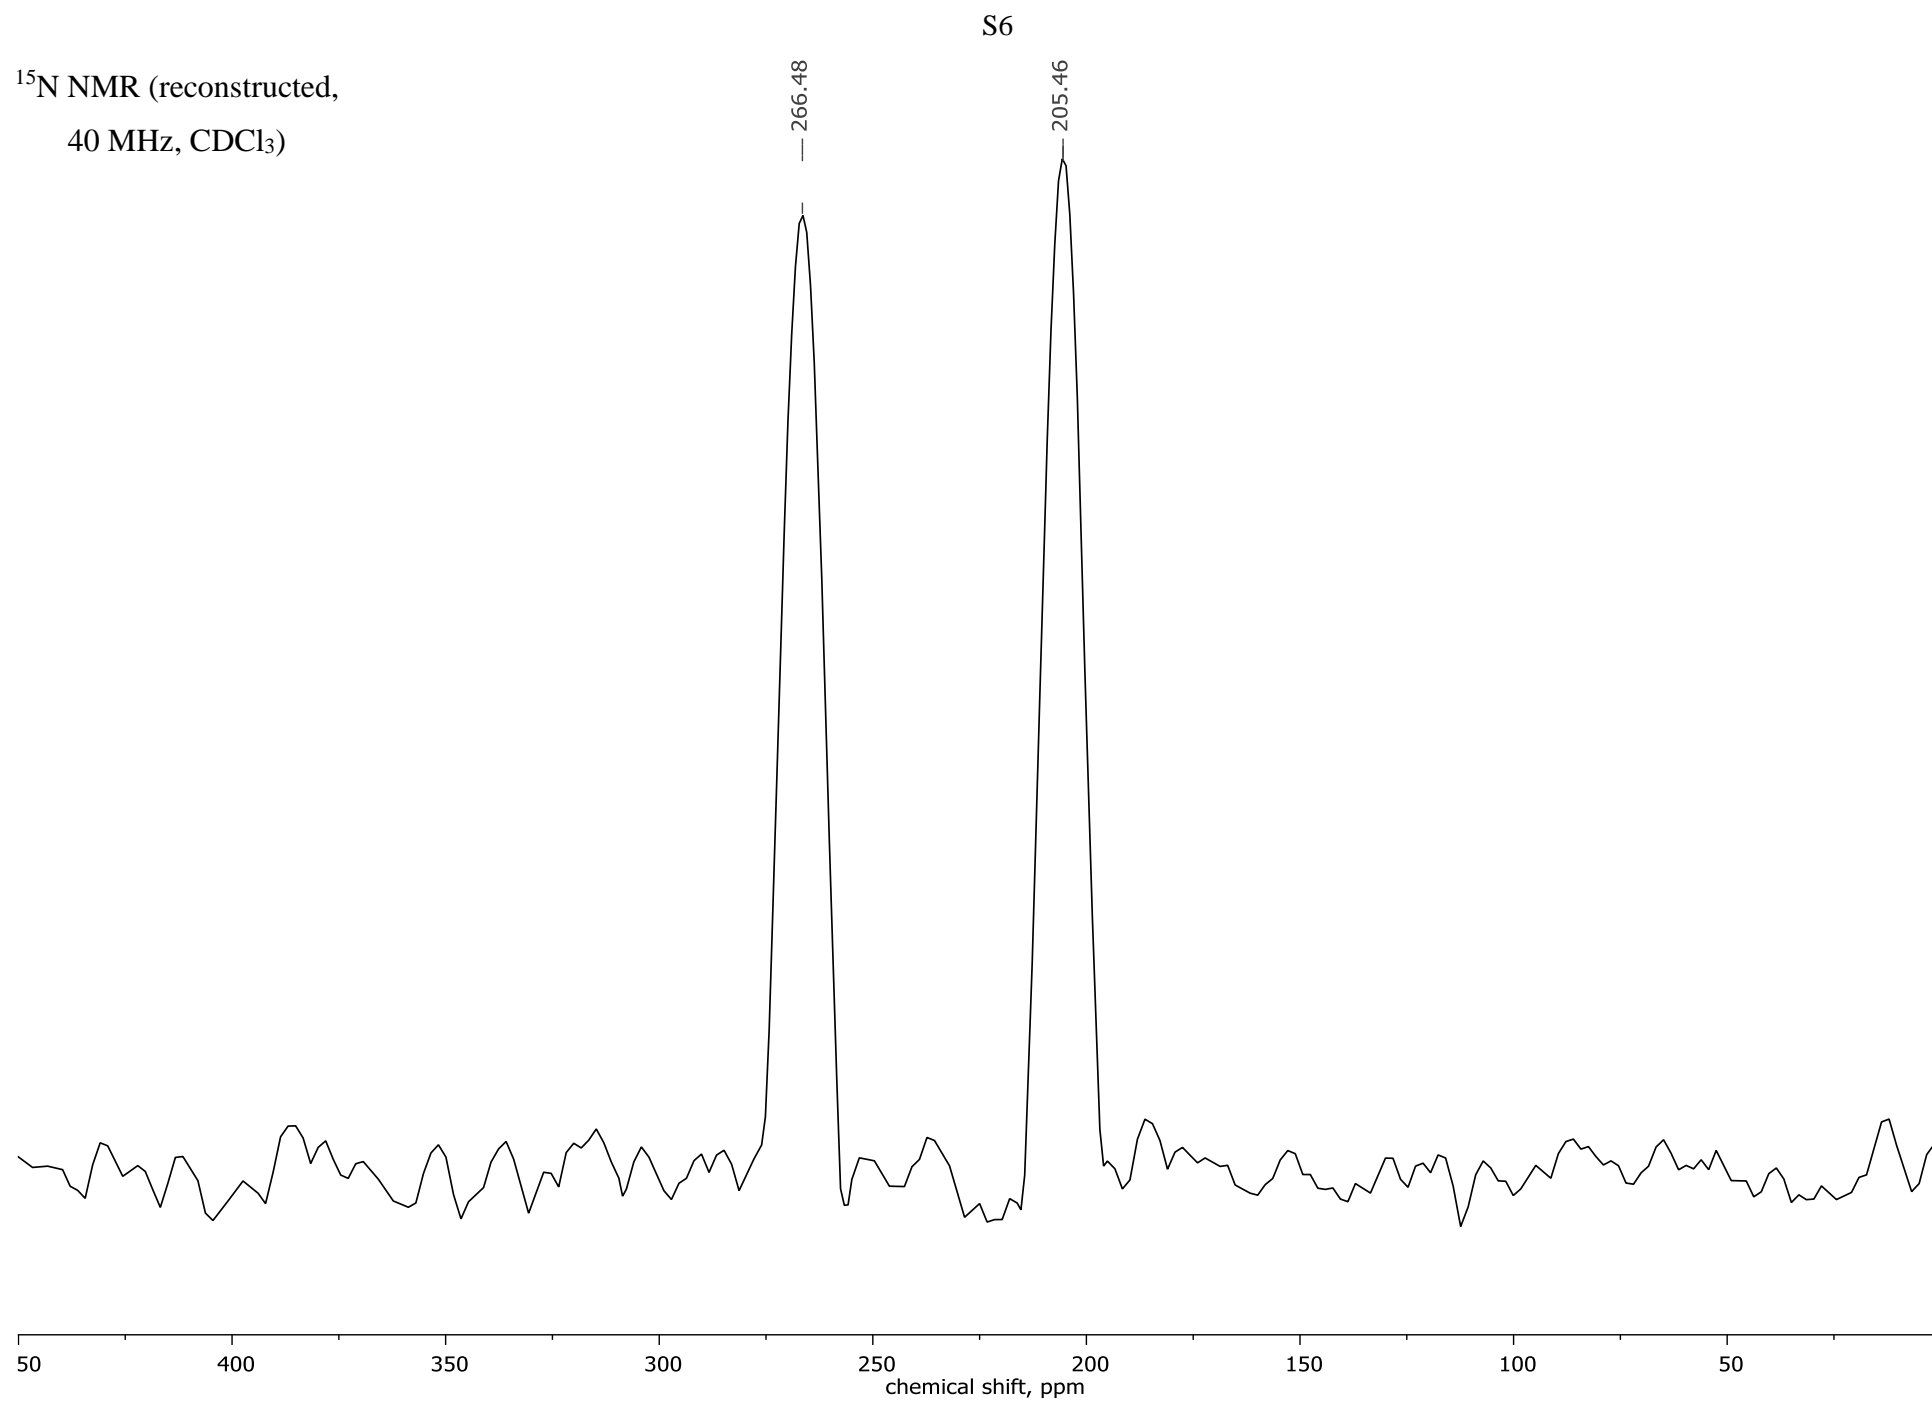

$^1\text{H} - ^{13}\text{C}$  HMBC  
(400 MHz,  $\text{CDCl}_3$ )

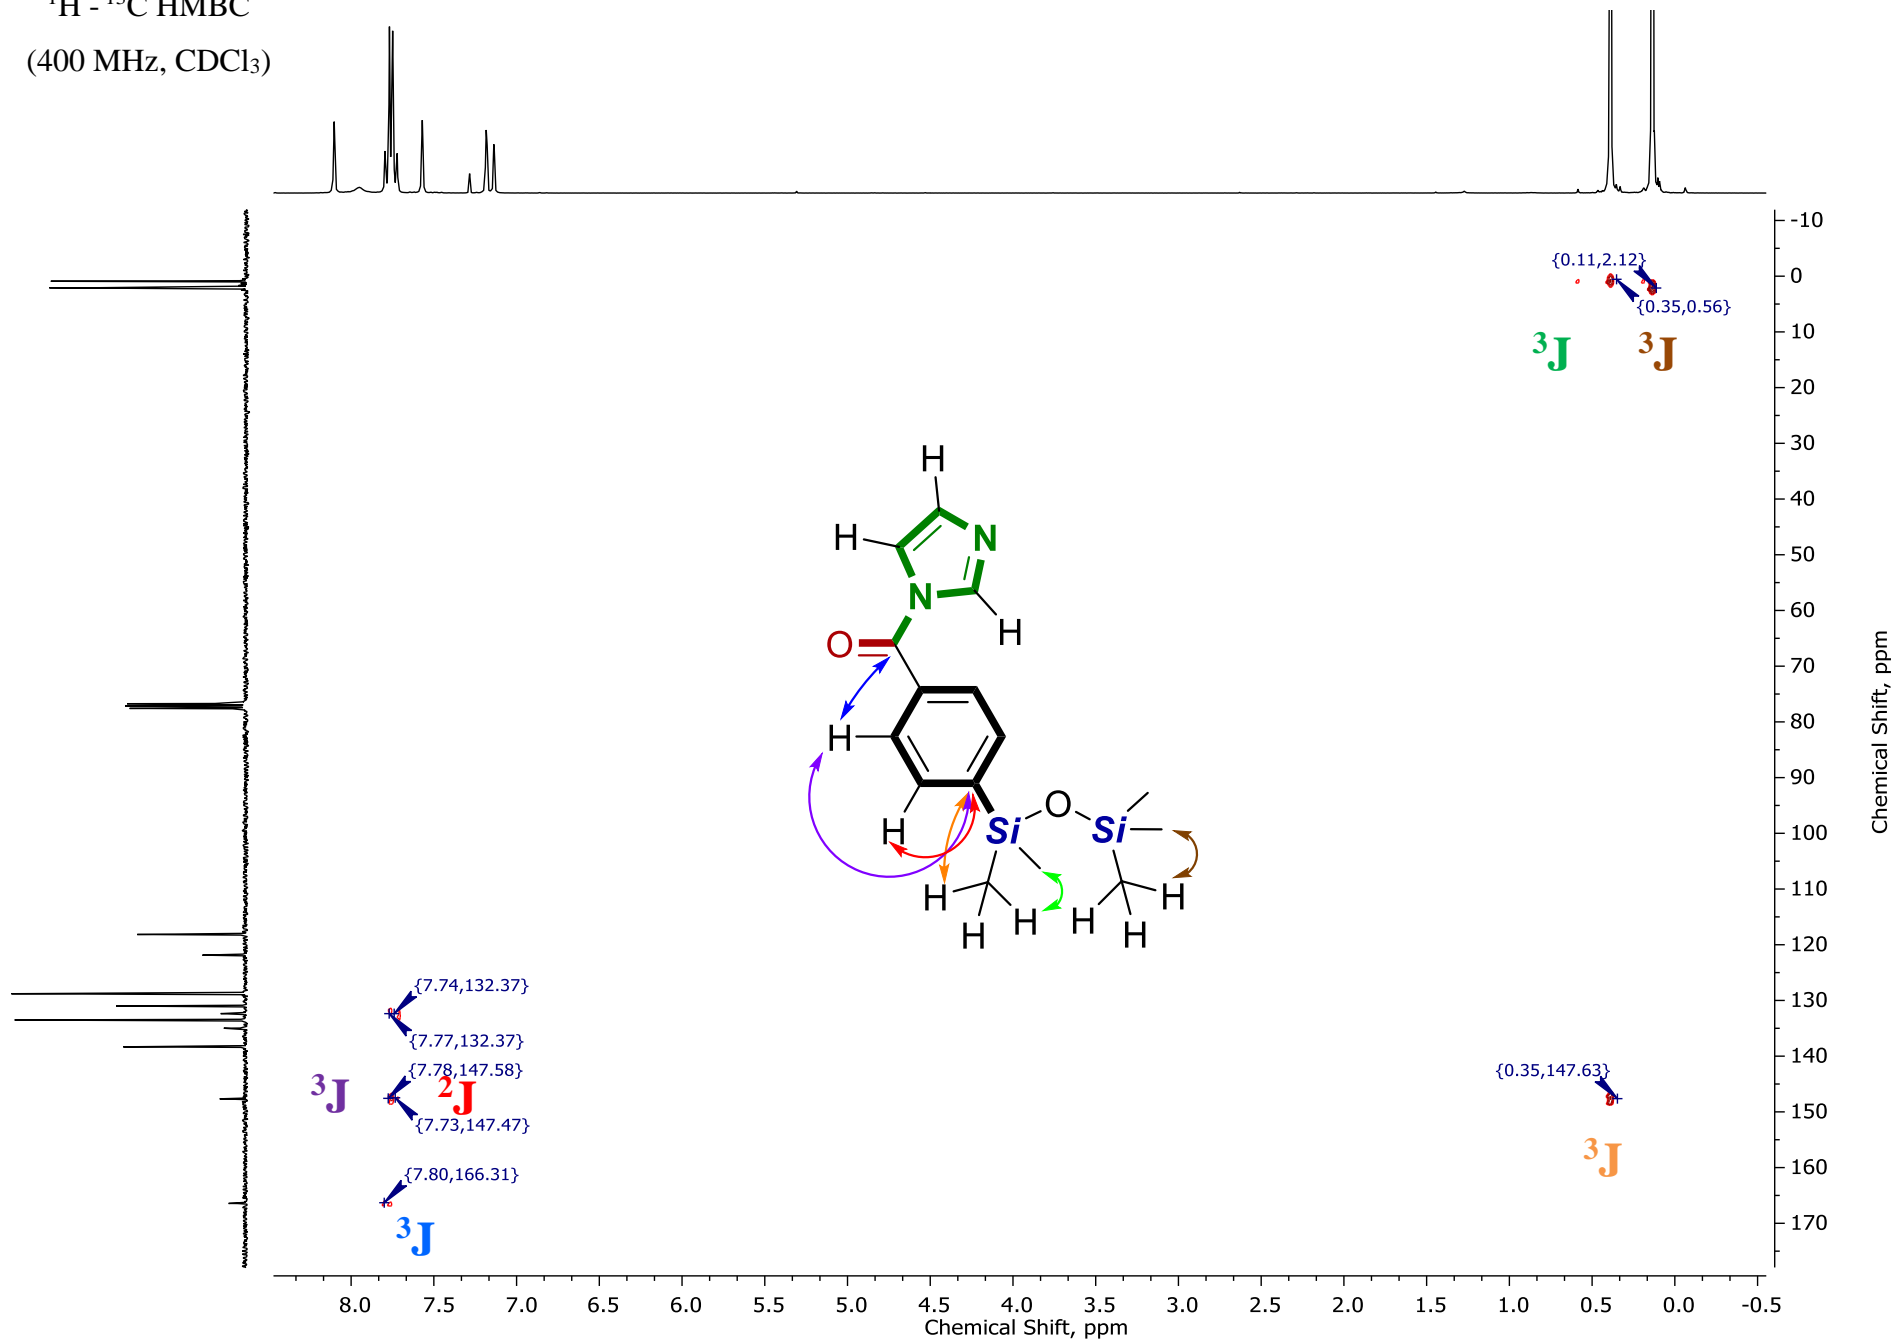

$^1\text{H} - ^{13}\text{C}$  HSQC  
(400 MHz,  $\text{CDCl}_3$ )

S8

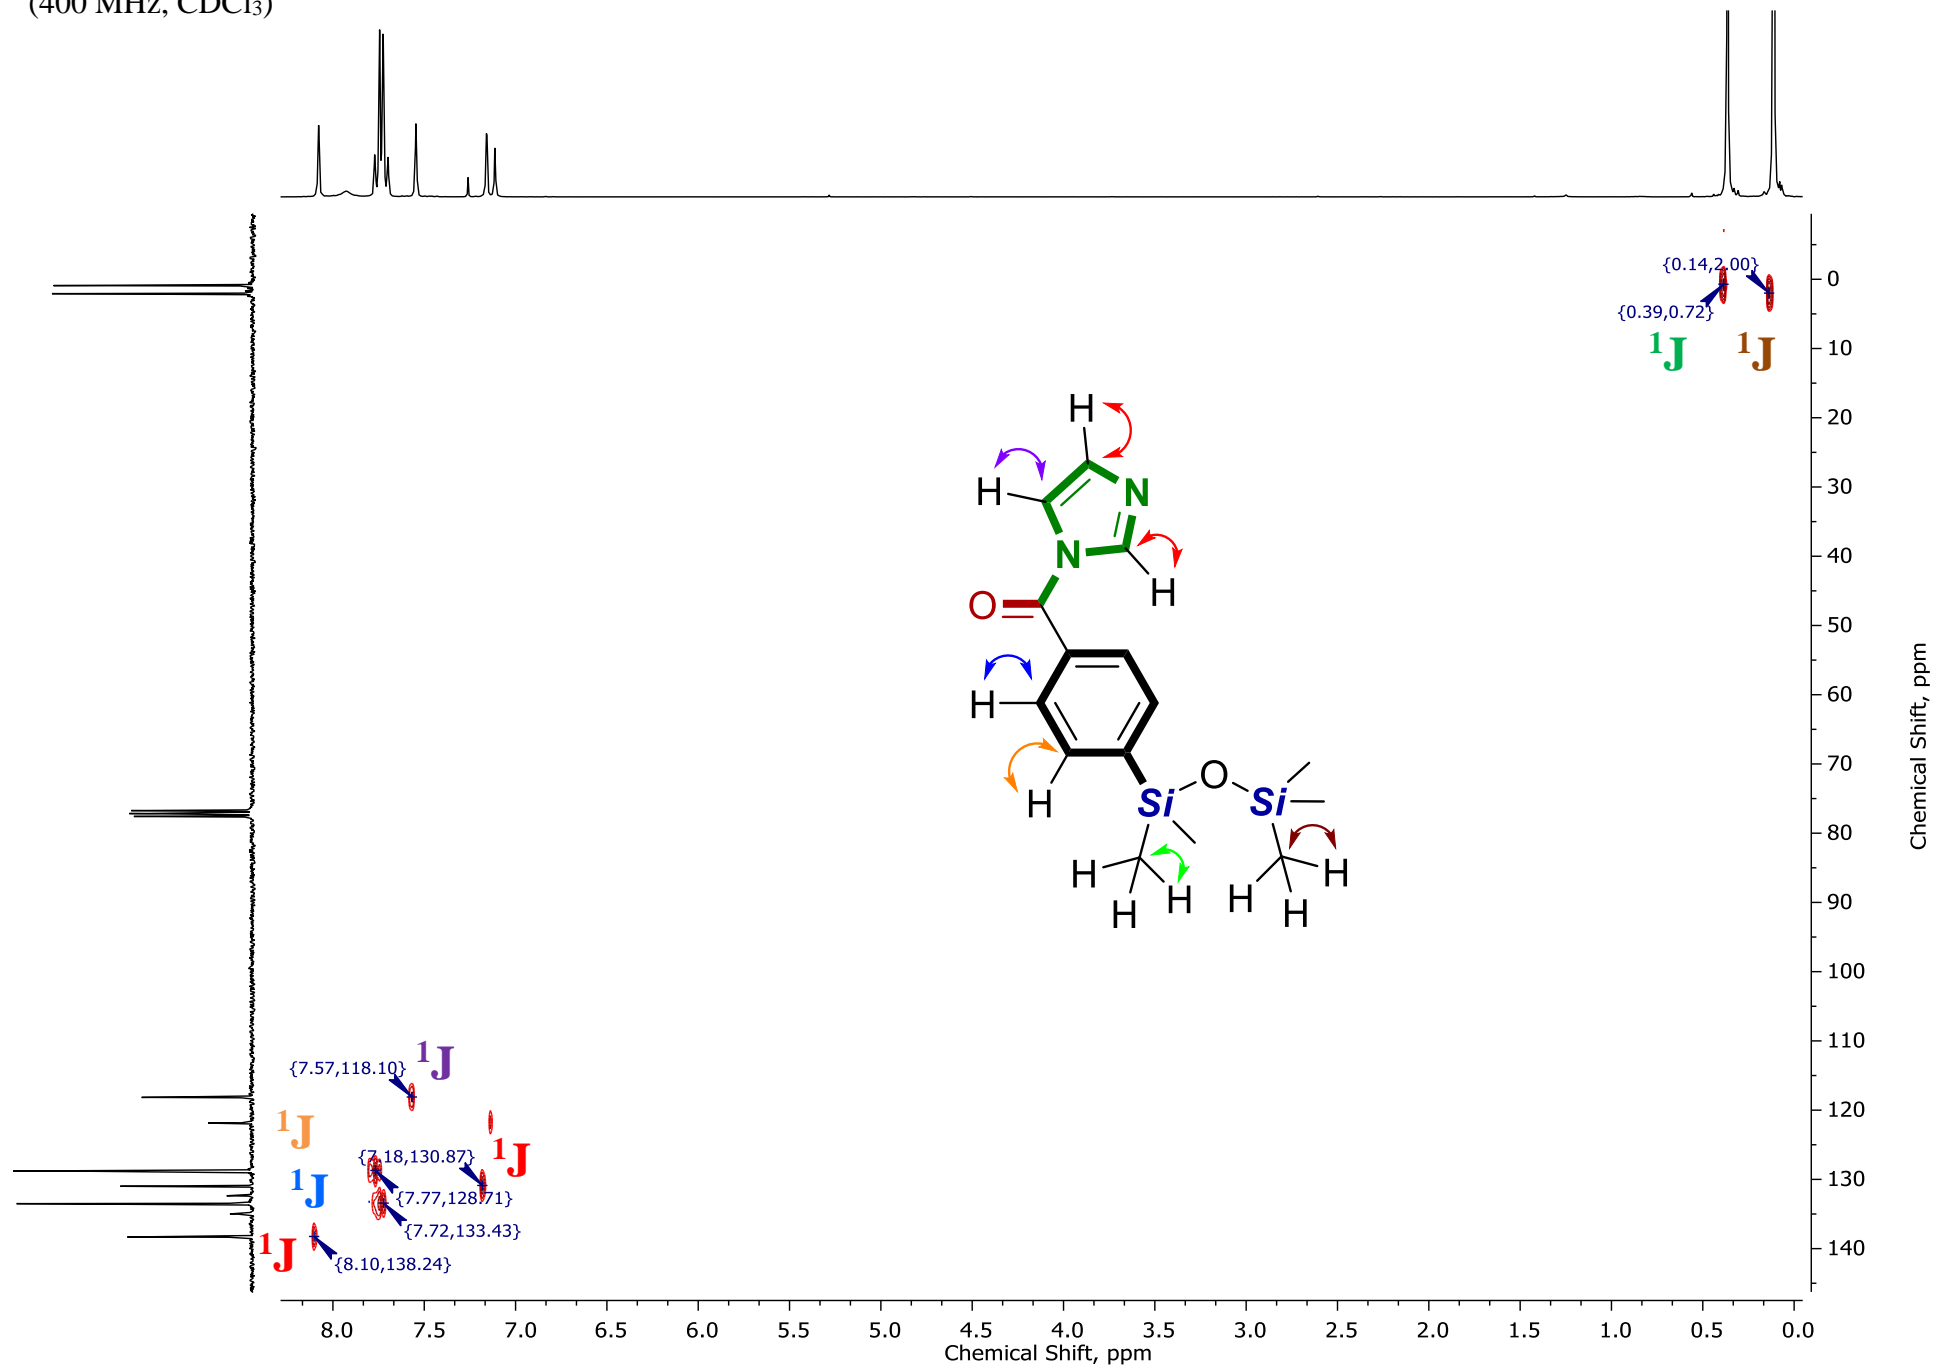



$^1\text{H} - ^{29}\text{Si}$  HMBC  
(400 MHz,  $\text{CDCl}_3$ )

S9

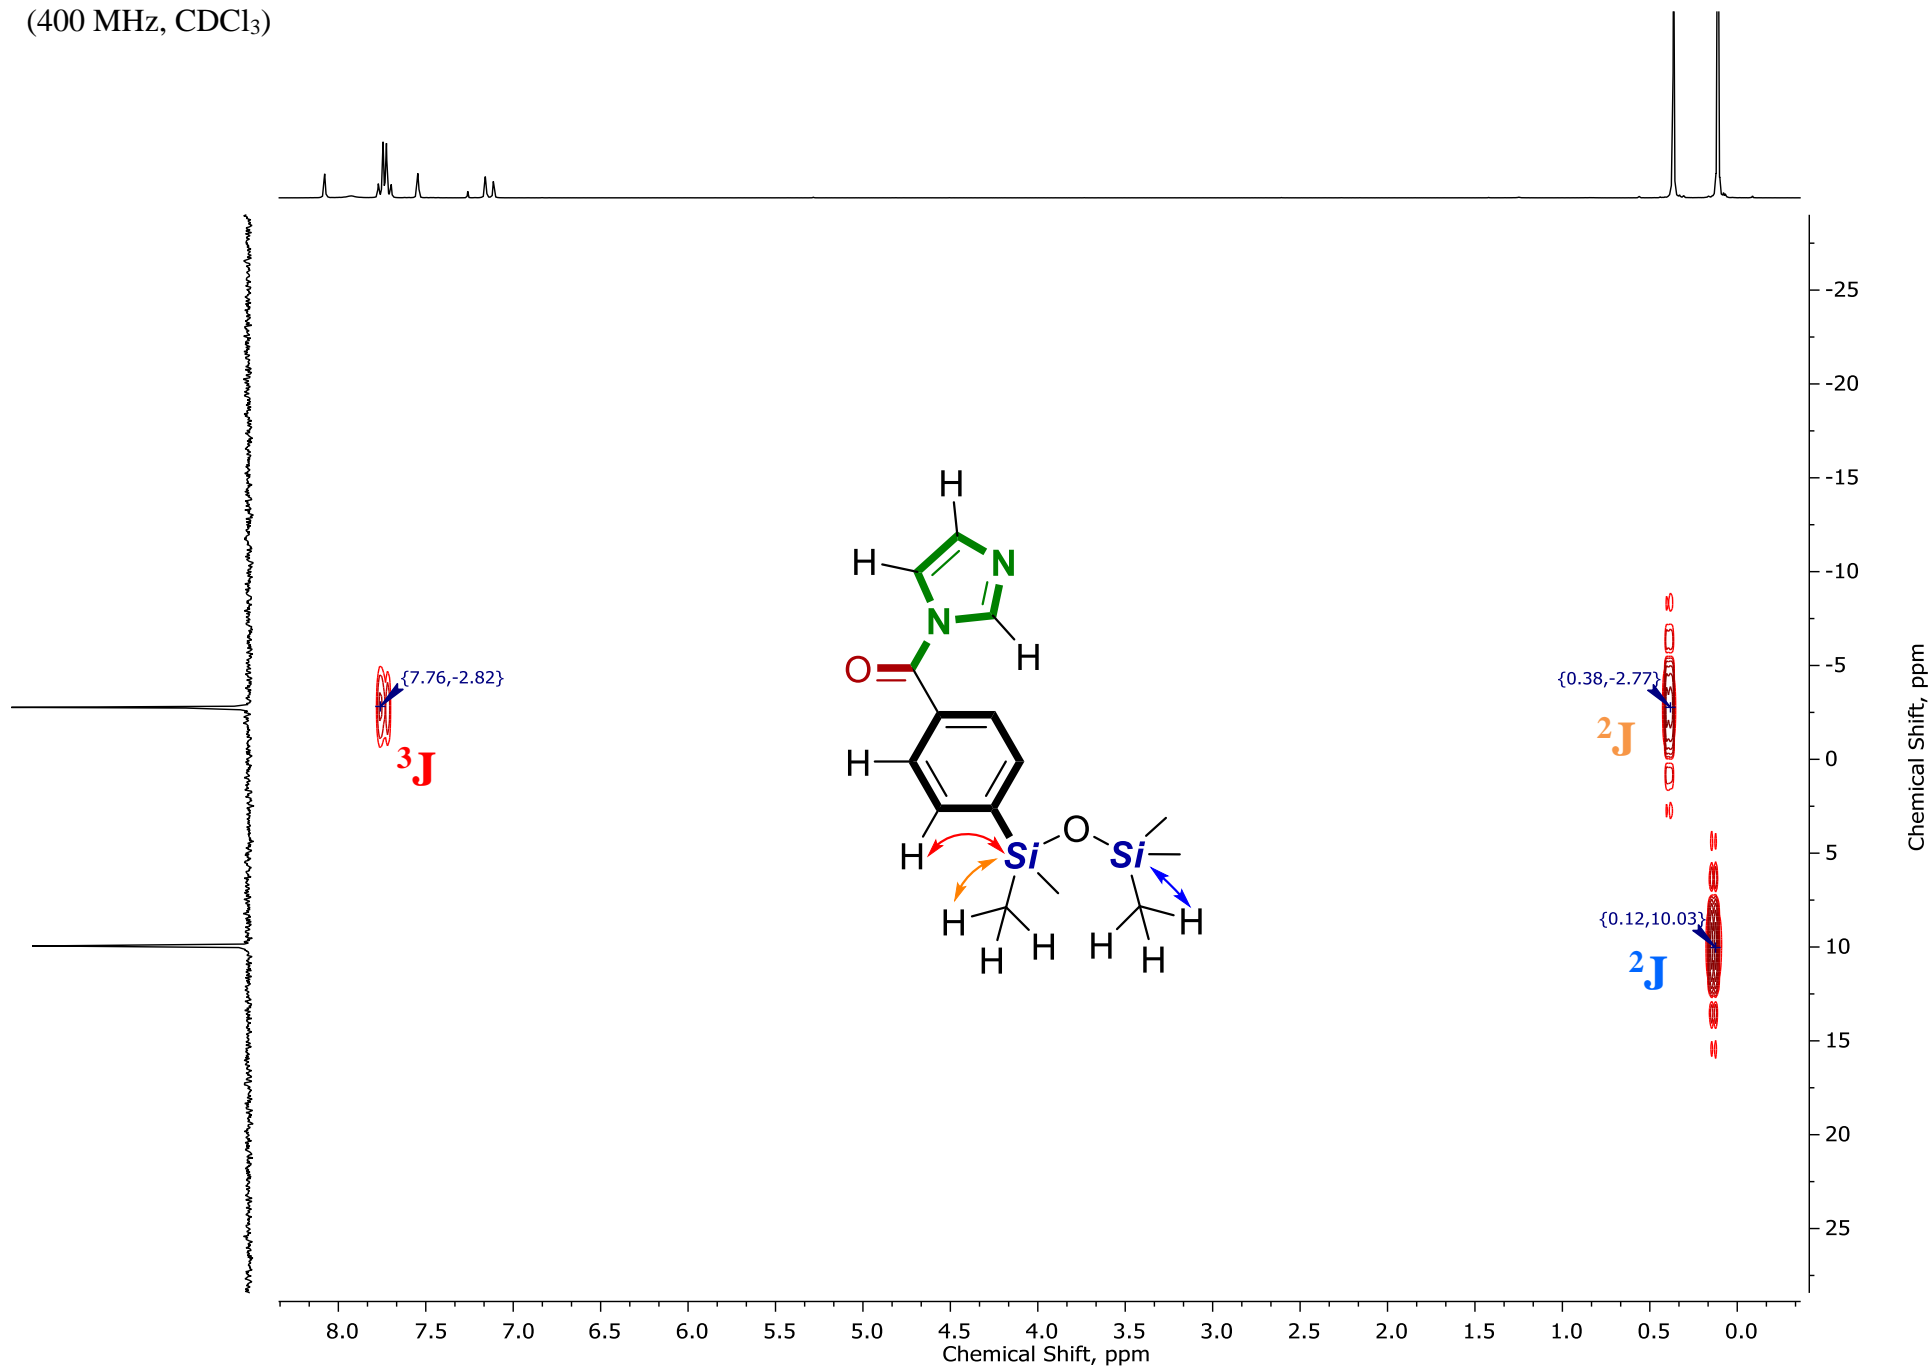

$^1\text{H} - ^{15}\text{N}$  HMBC  
(400 MHz,  $\text{CDCl}_3$ )

S10

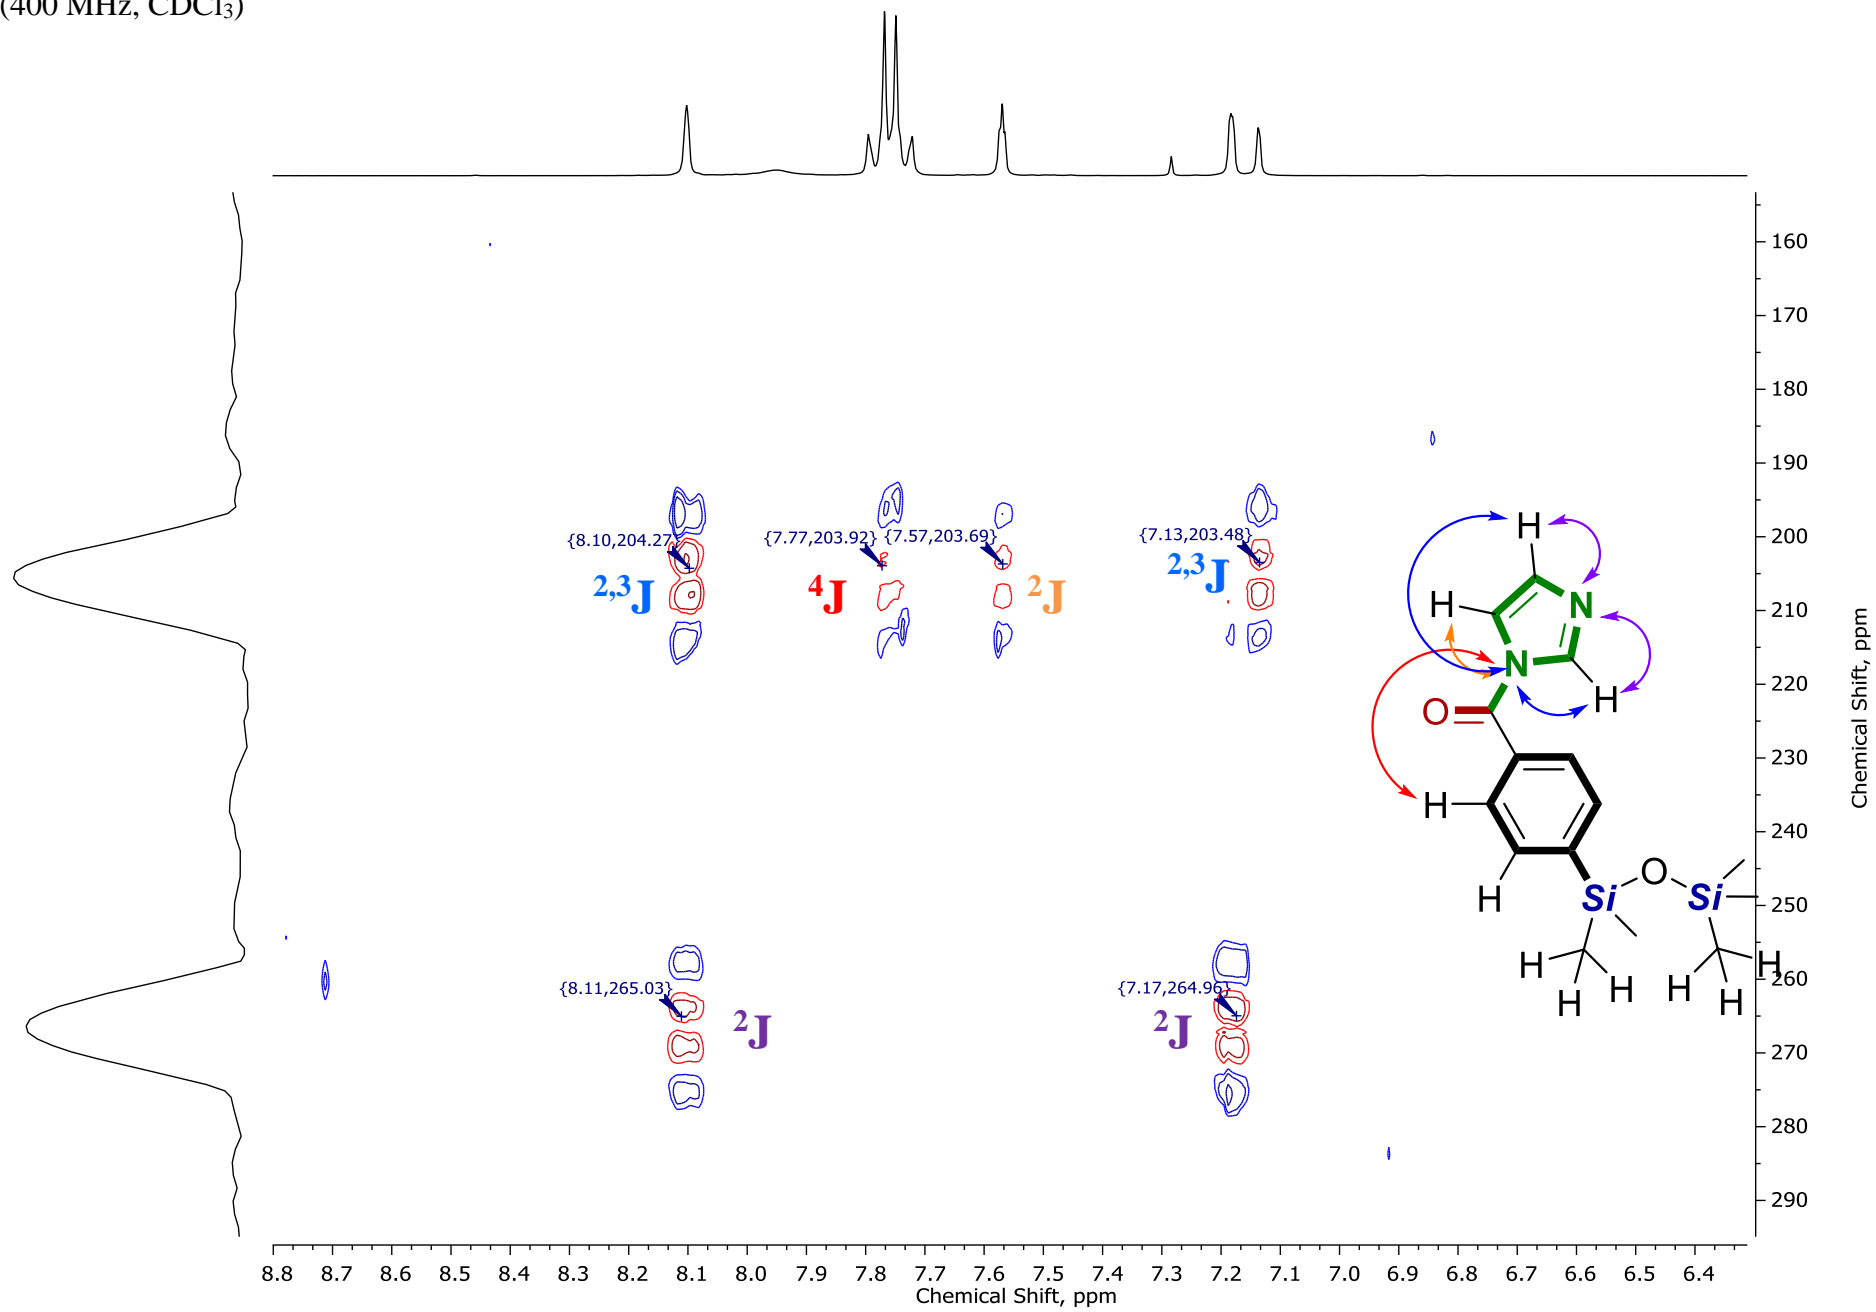

S11

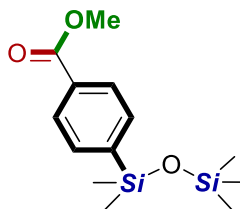

**Characterisation data for methyl 4-(1,1,3,3,3-pentamethyldisiloxanyl)benzoate:**

$^1\text{H}$  NMR (400 MHz, DMSO- $d_6$ ):  $\delta$  = 7.95 (d,  $^3J=8$  Hz, 2H),  $\delta$  = 7.68 (d,  $^3J=8$  Hz, 2H),  $\delta$  = 3.85 (s, 3H),  $\delta$  = 0.33 (s, 6H),  $\delta$  = 0.06 (s, 9H).  $^{13}\text{C}$  NMR (100 MHz, DMSO- $d_6$ ):  $\delta$  = 166.71, 146.07, 133.52, 130.79, 128.66, 52.57, 2.34, 1.06.  $^{29}\text{Si}$  NMR (80 MHz, DMSO- $d_6$ ):  $\delta$  = 9.48, -2.06. HRMS (ESI)  $m/z$   $[M + \text{NH}_4]^+$  : calcd for  $[\text{C}_{20}\text{H}_{26}\text{O}_5\text{Si}_2 + \text{NH}_4]^+$ , 420.1657; found, 420.1656;  $[M + \text{Na}]^+$  : calcd for  $[\text{C}_{20}\text{H}_{26}\text{O}_5\text{Si}_2 + \text{Na}]^+$ , 425.1211; found, 425.1214;  $[M + \text{K}]^+$  : calcd for  $[\text{C}_{20}\text{H}_{26}\text{O}_5\text{Si}_2 + \text{K}]^+$ , 441.0950; found, 441.0948. IR ( $\text{cm}^{-1}$ ): 2957, 1938, 1730, 1601, 1557, 1499, 1436, 1389, 1314-1256, 1187-968, 876-638.

<sup>1</sup>H NMR

(400 MHz, DMSO-d6)

S12

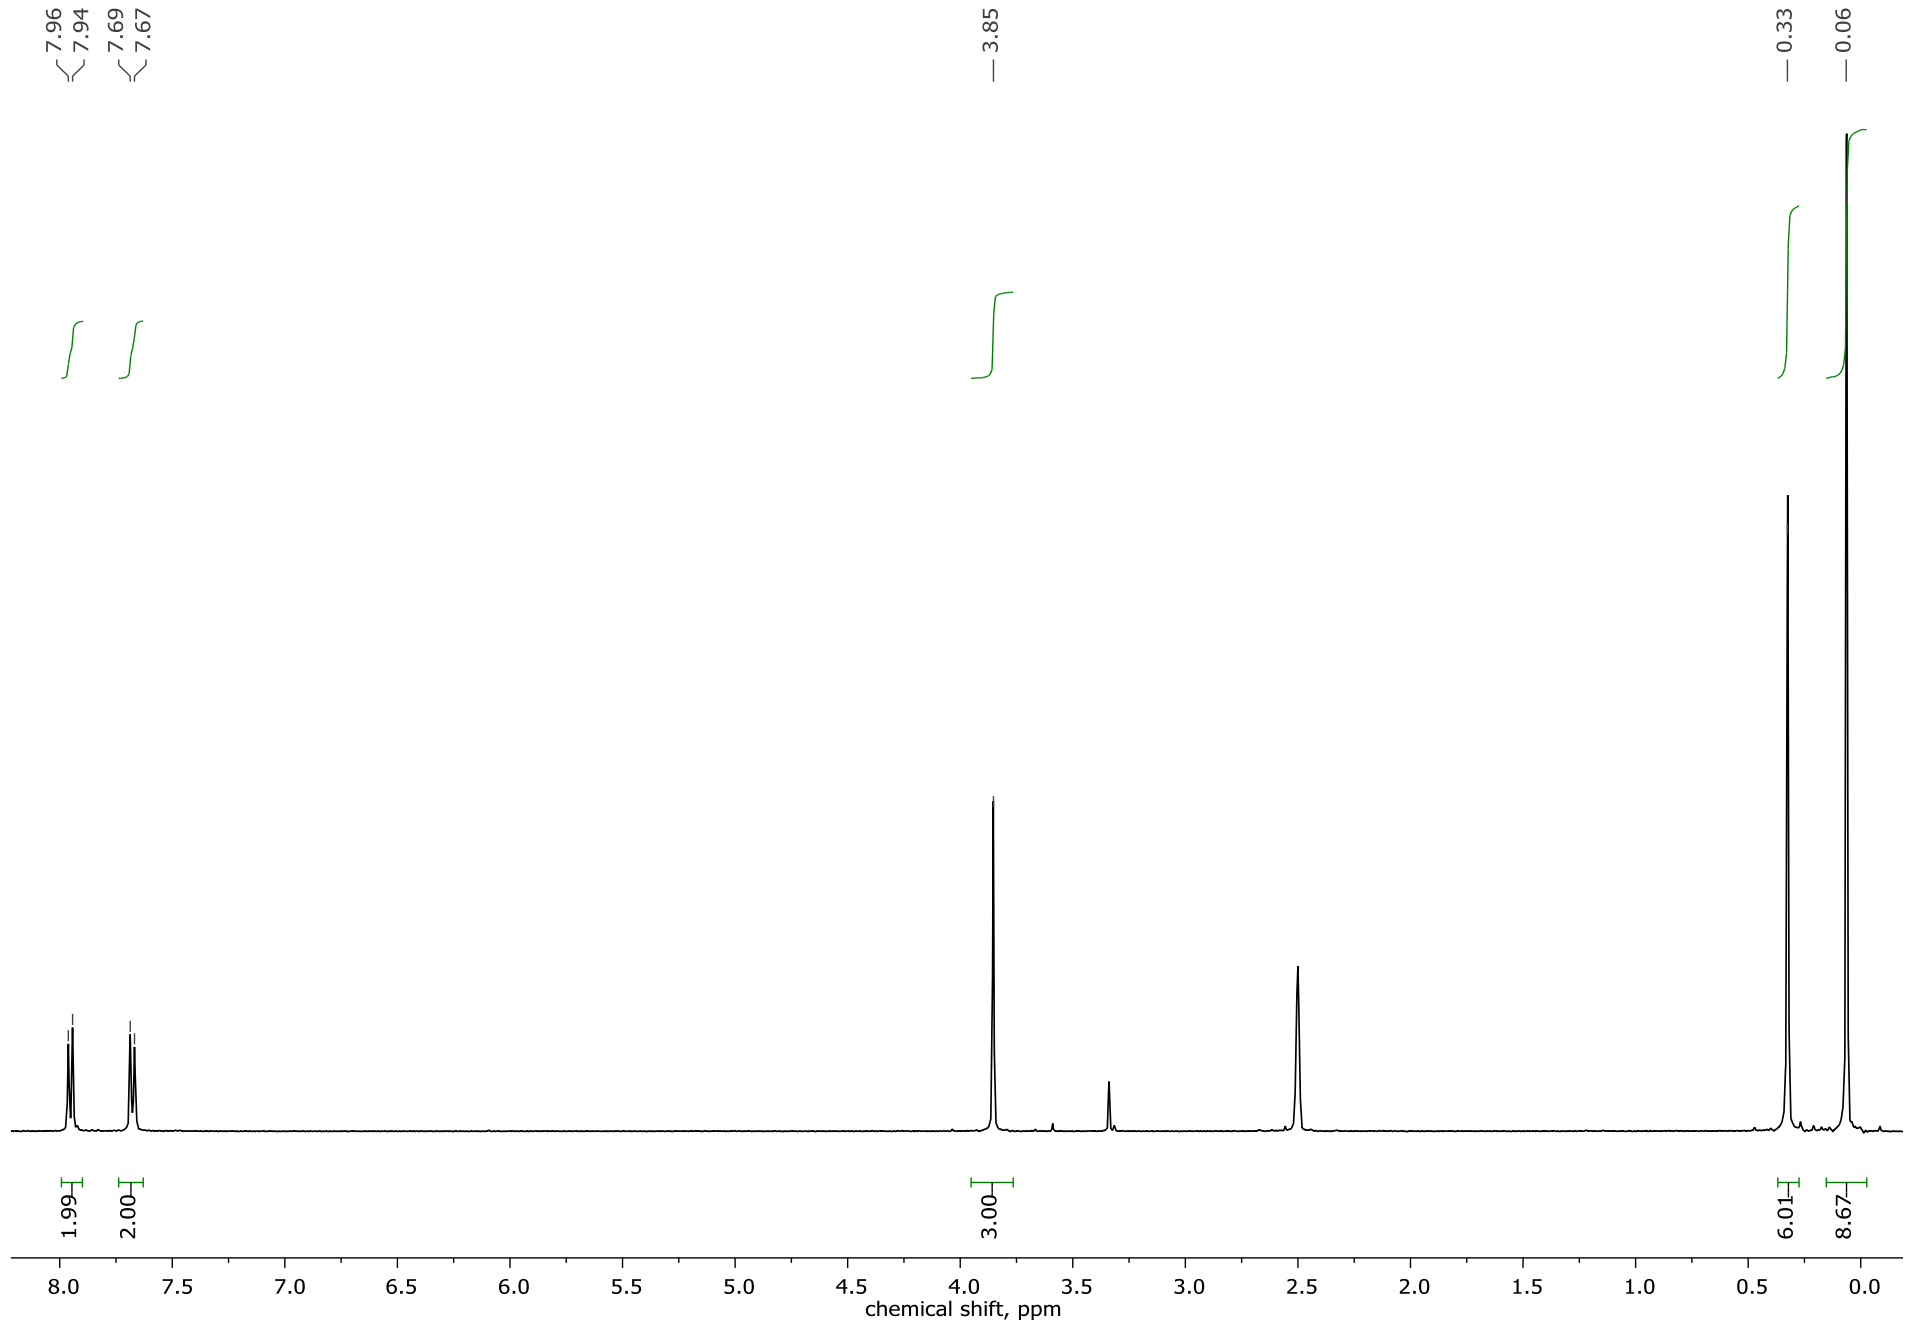

<sup>13</sup>C NMR

(100 MHz, DMSO-d6)

S13

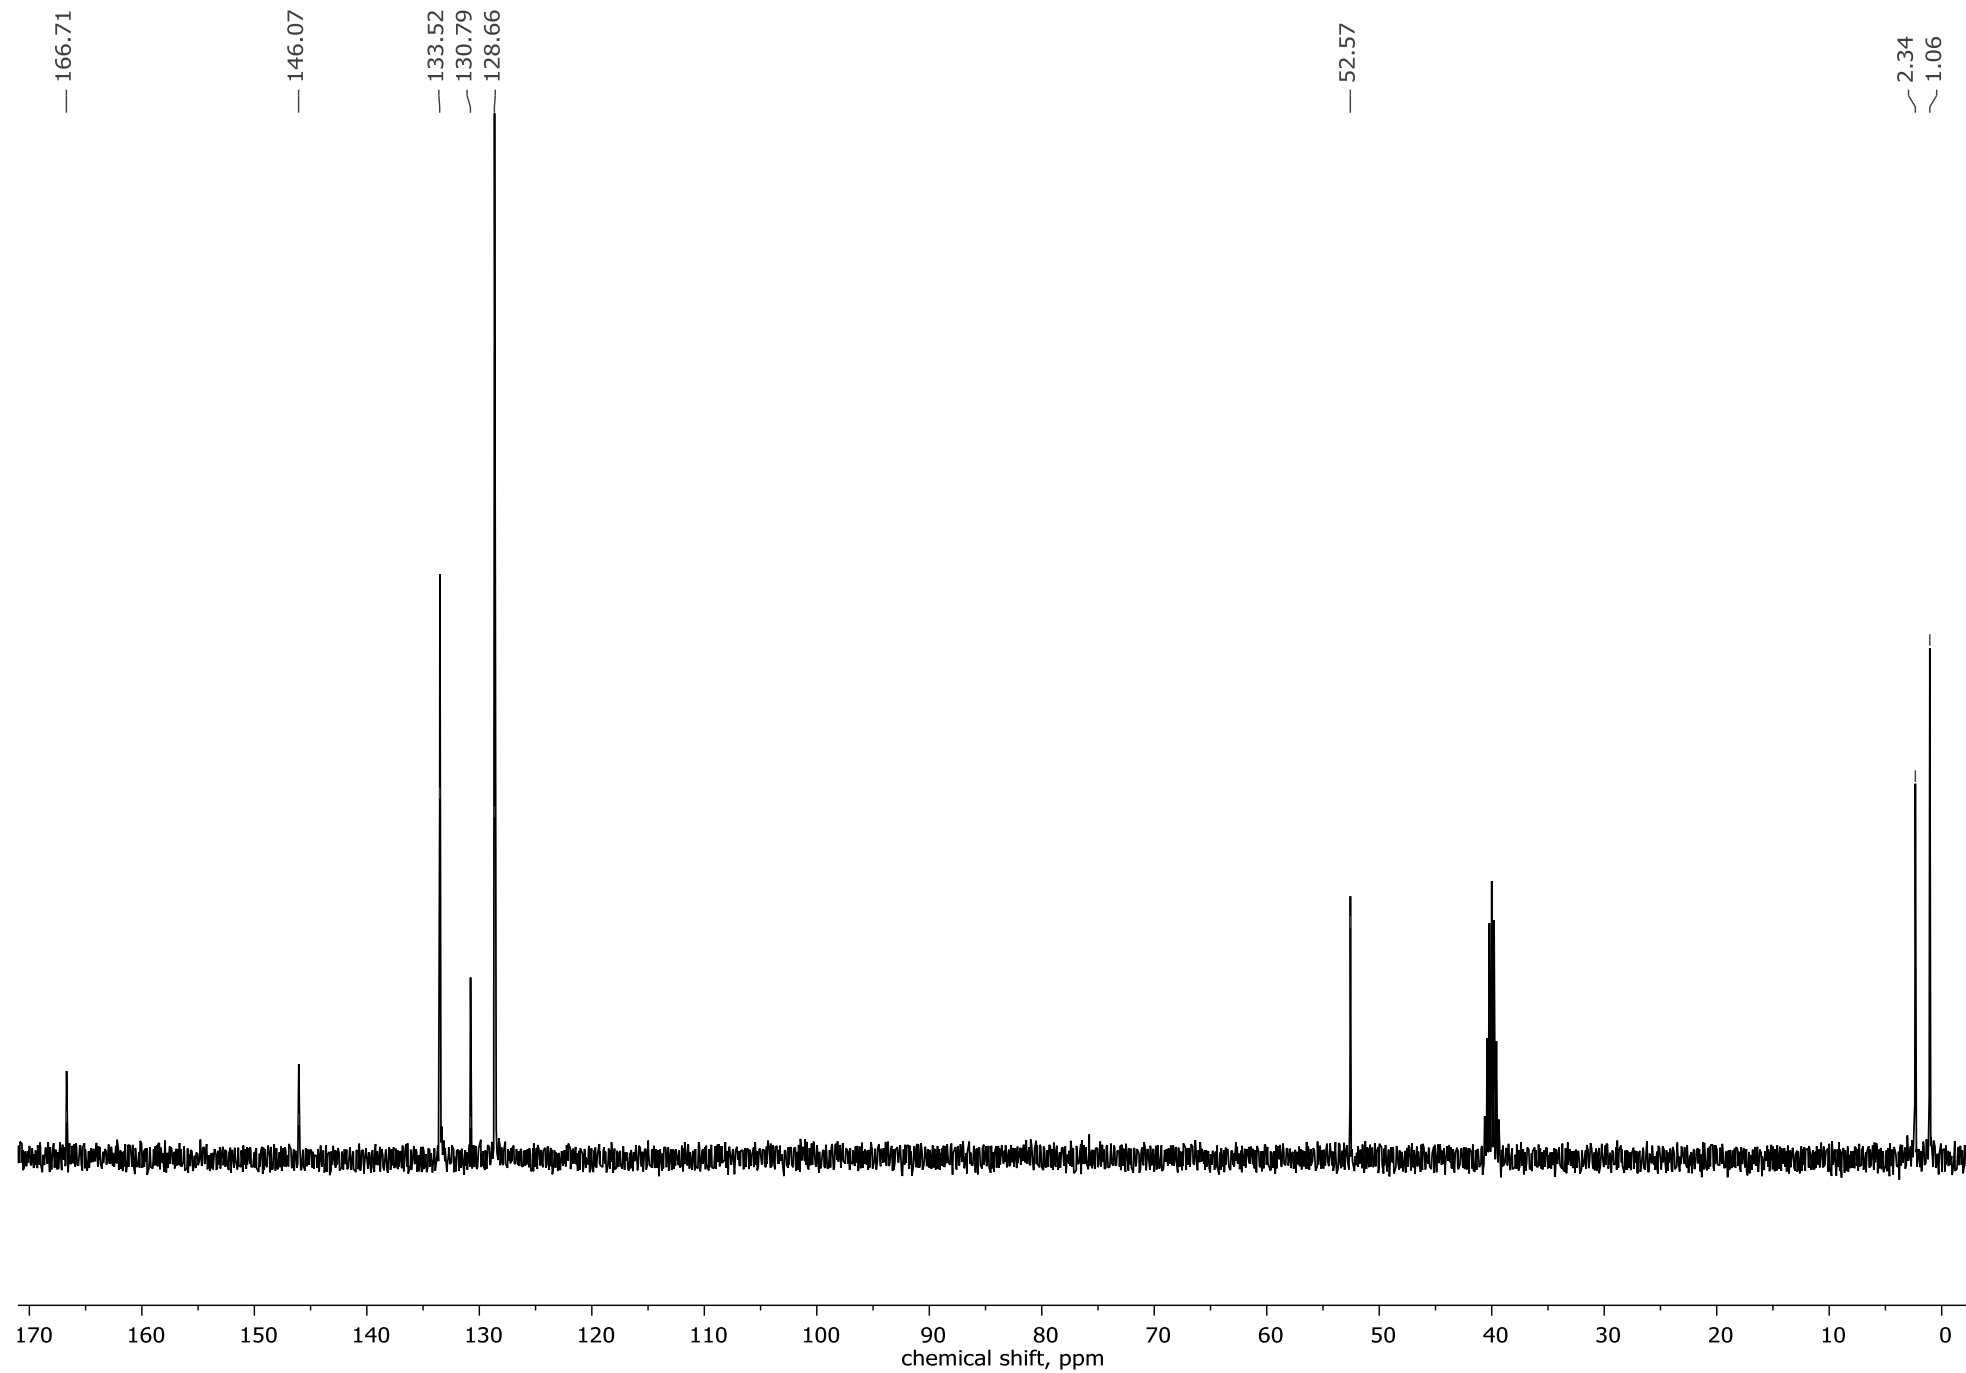

$^{29}\text{Si}$  NMR  
(80 MHz, DMSO-d<sub>6</sub>)

S14

9.48  
-2.06

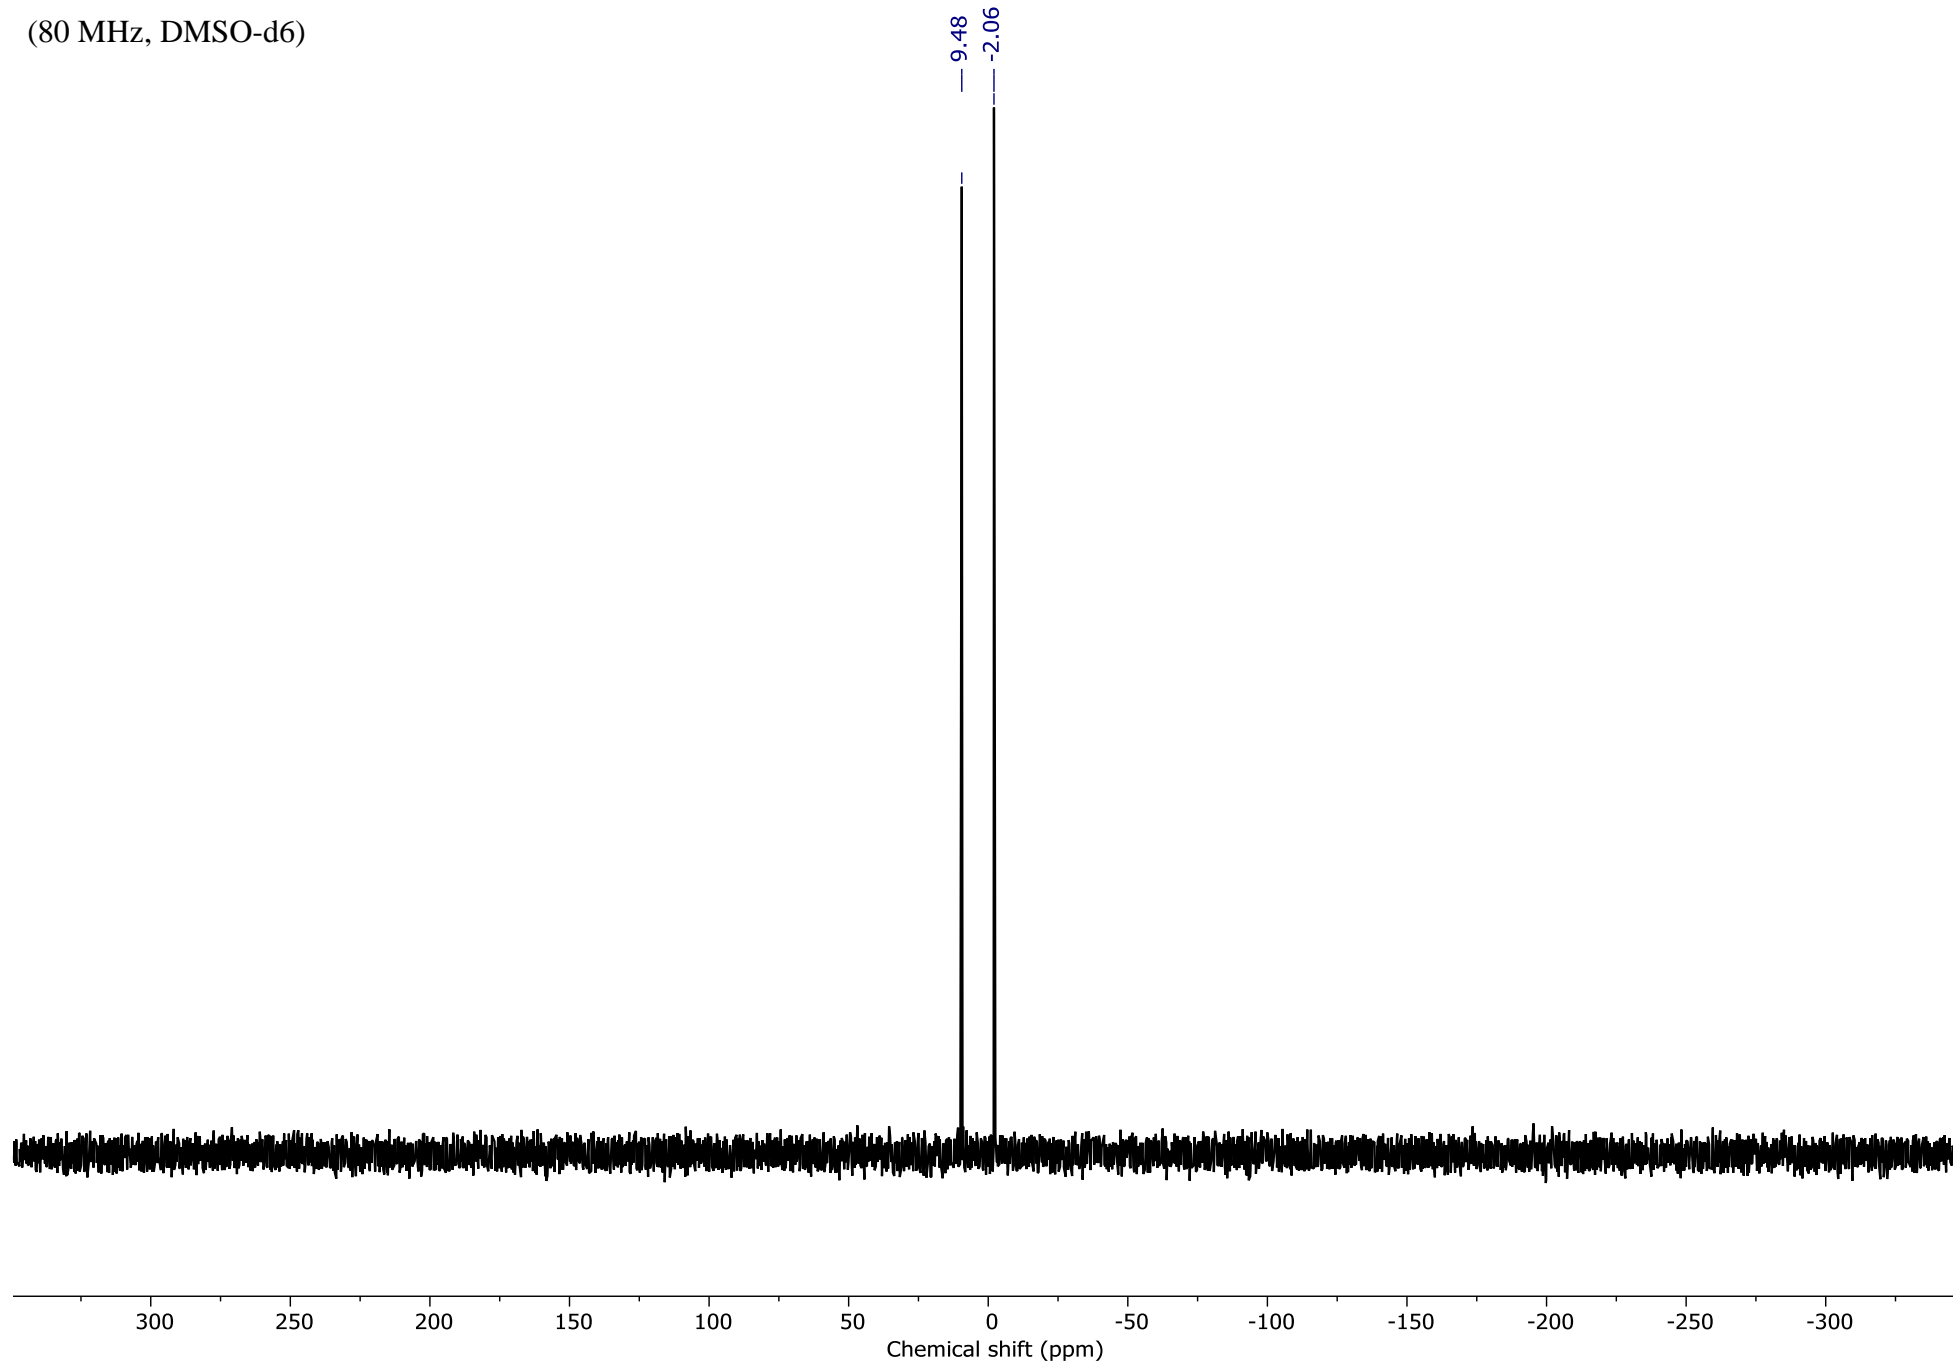

$^1\text{H} - ^{13}\text{C}$  HMBC  
(400 MHz, DMSO-d<sub>6</sub>)

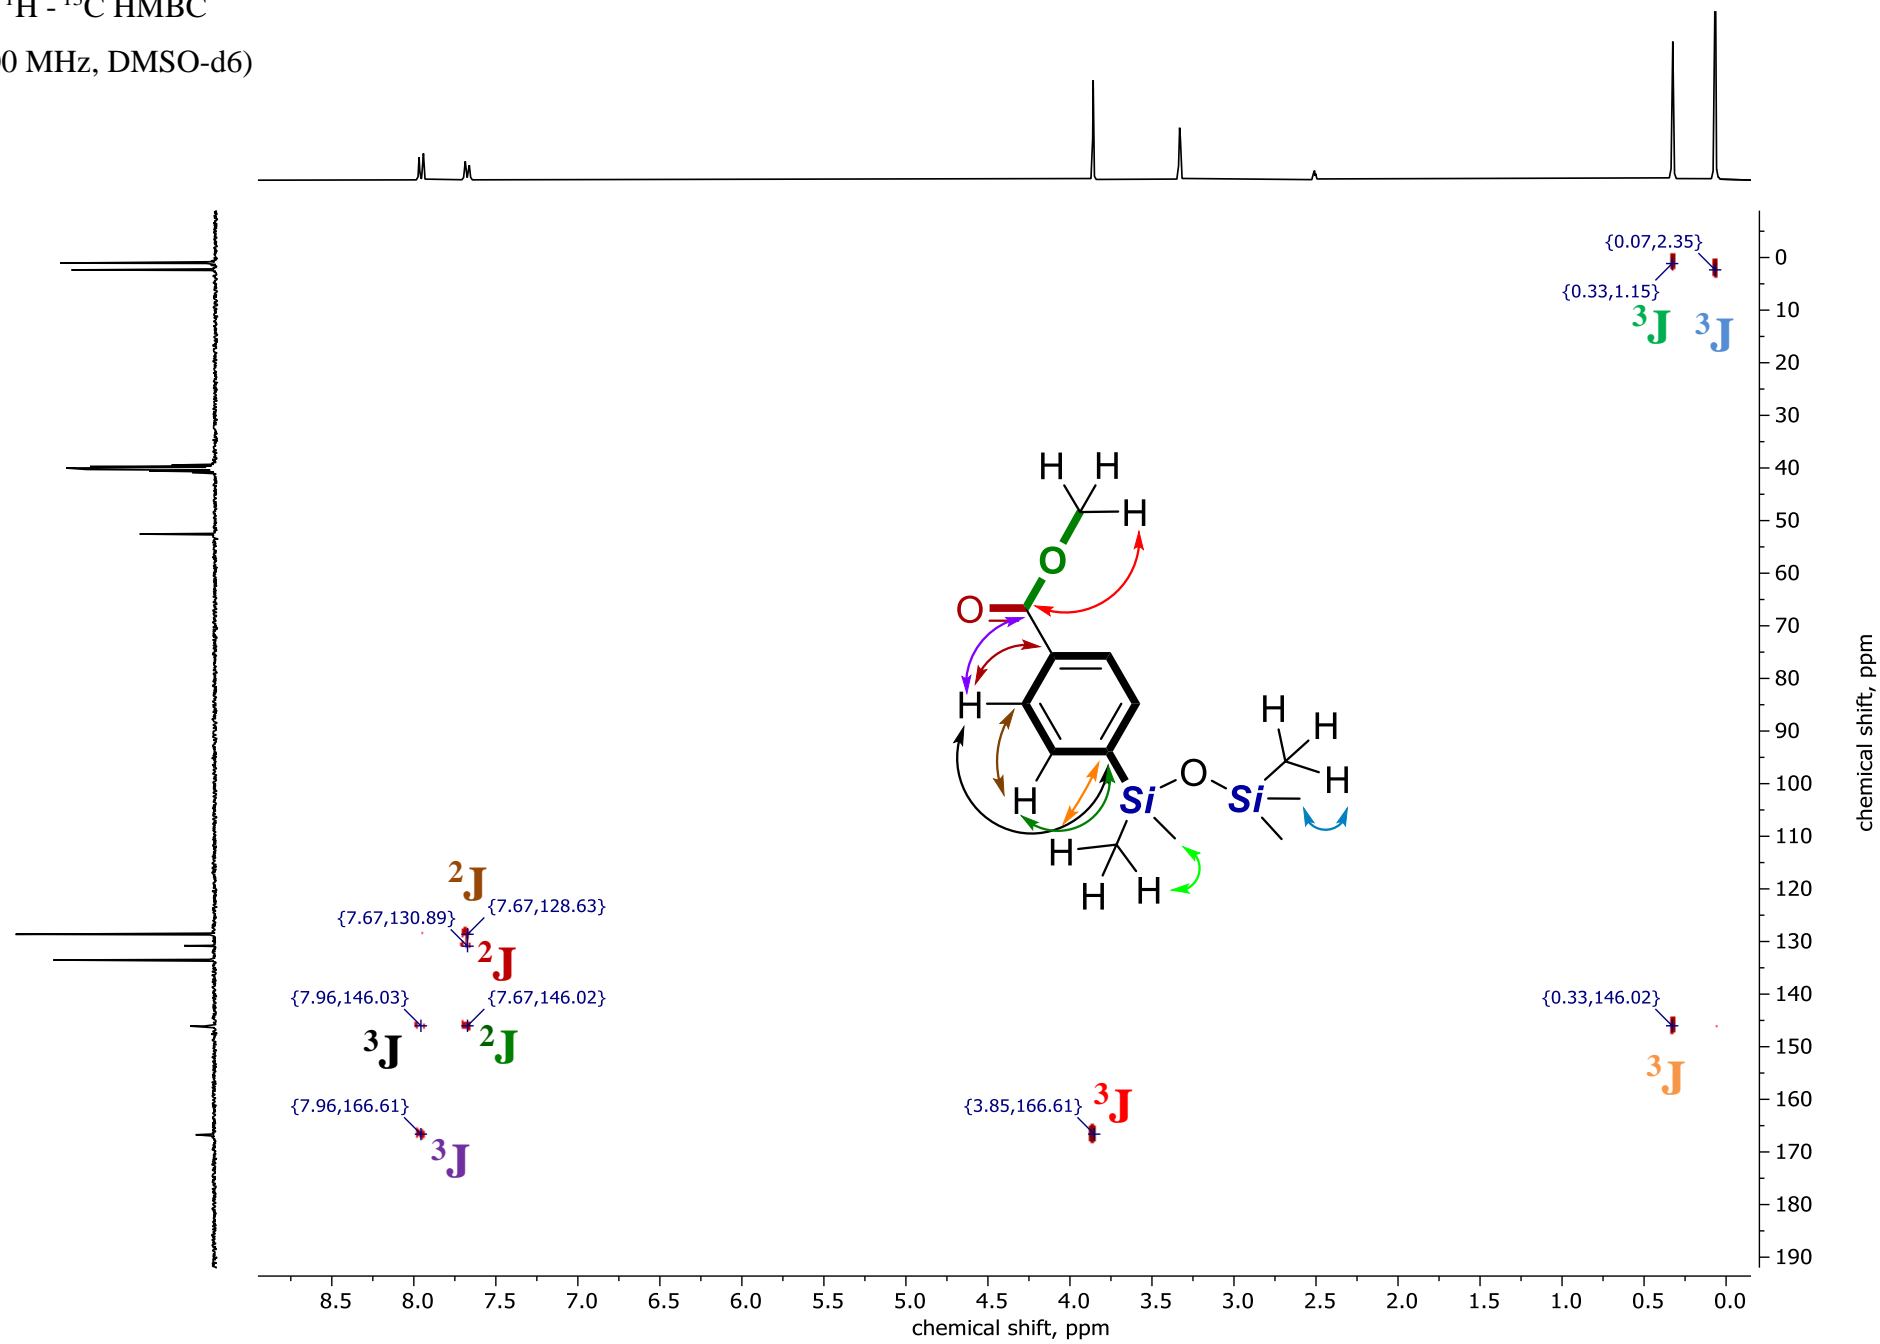

$^1\text{H} - ^{13}\text{C}$  HSQC  
(400 MHz, DMSO-d<sub>6</sub>)

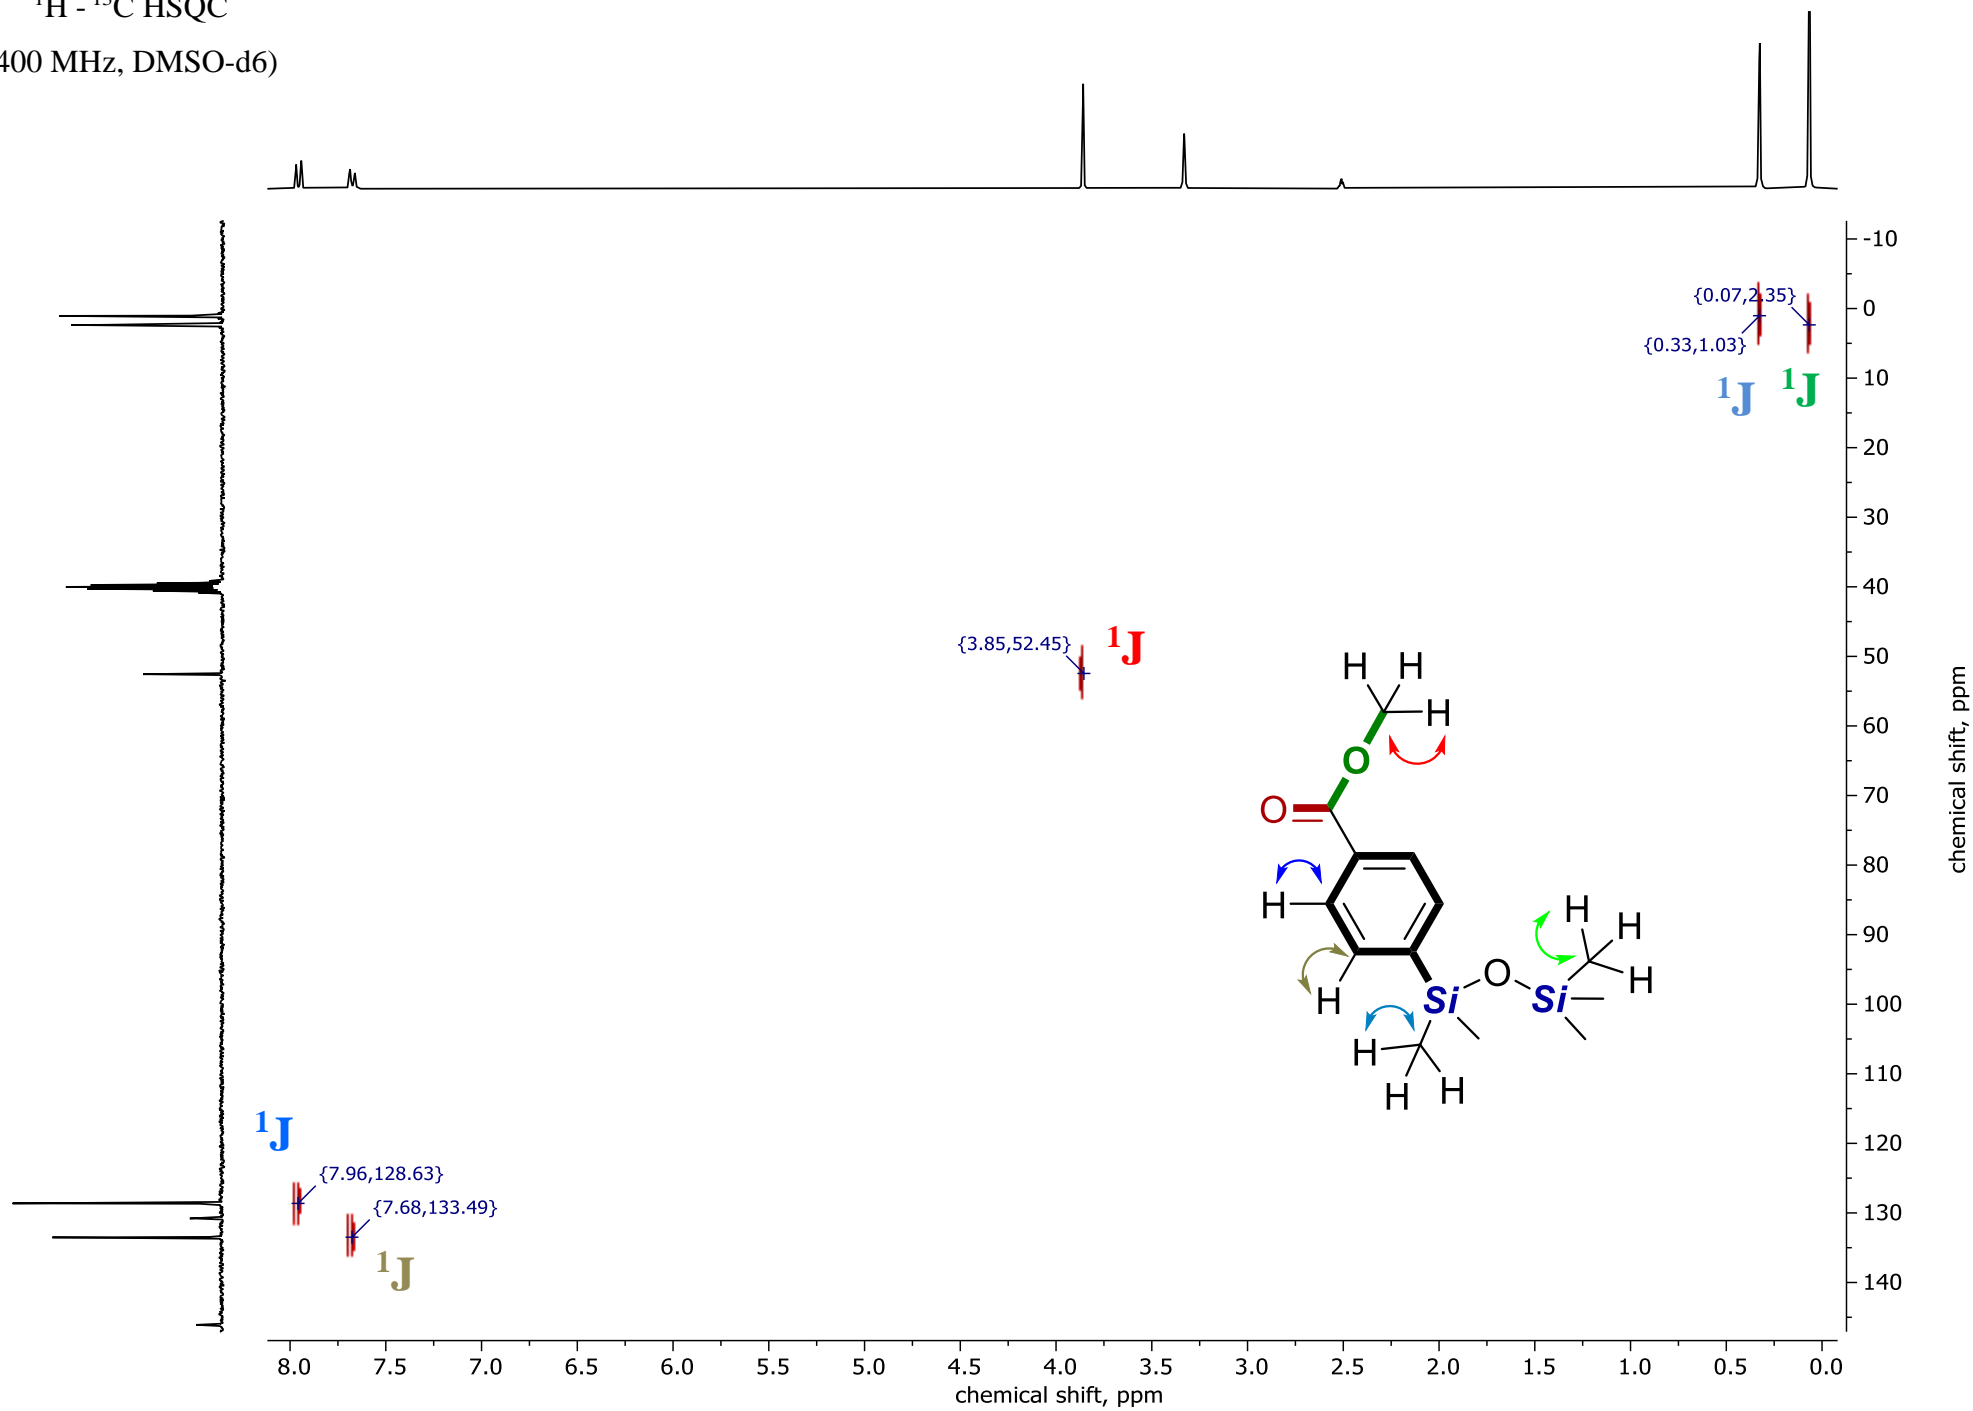



$^1\text{H} - ^{29}\text{Si}$  HMBC  
(400 MHz, DMSO-d<sub>6</sub>)

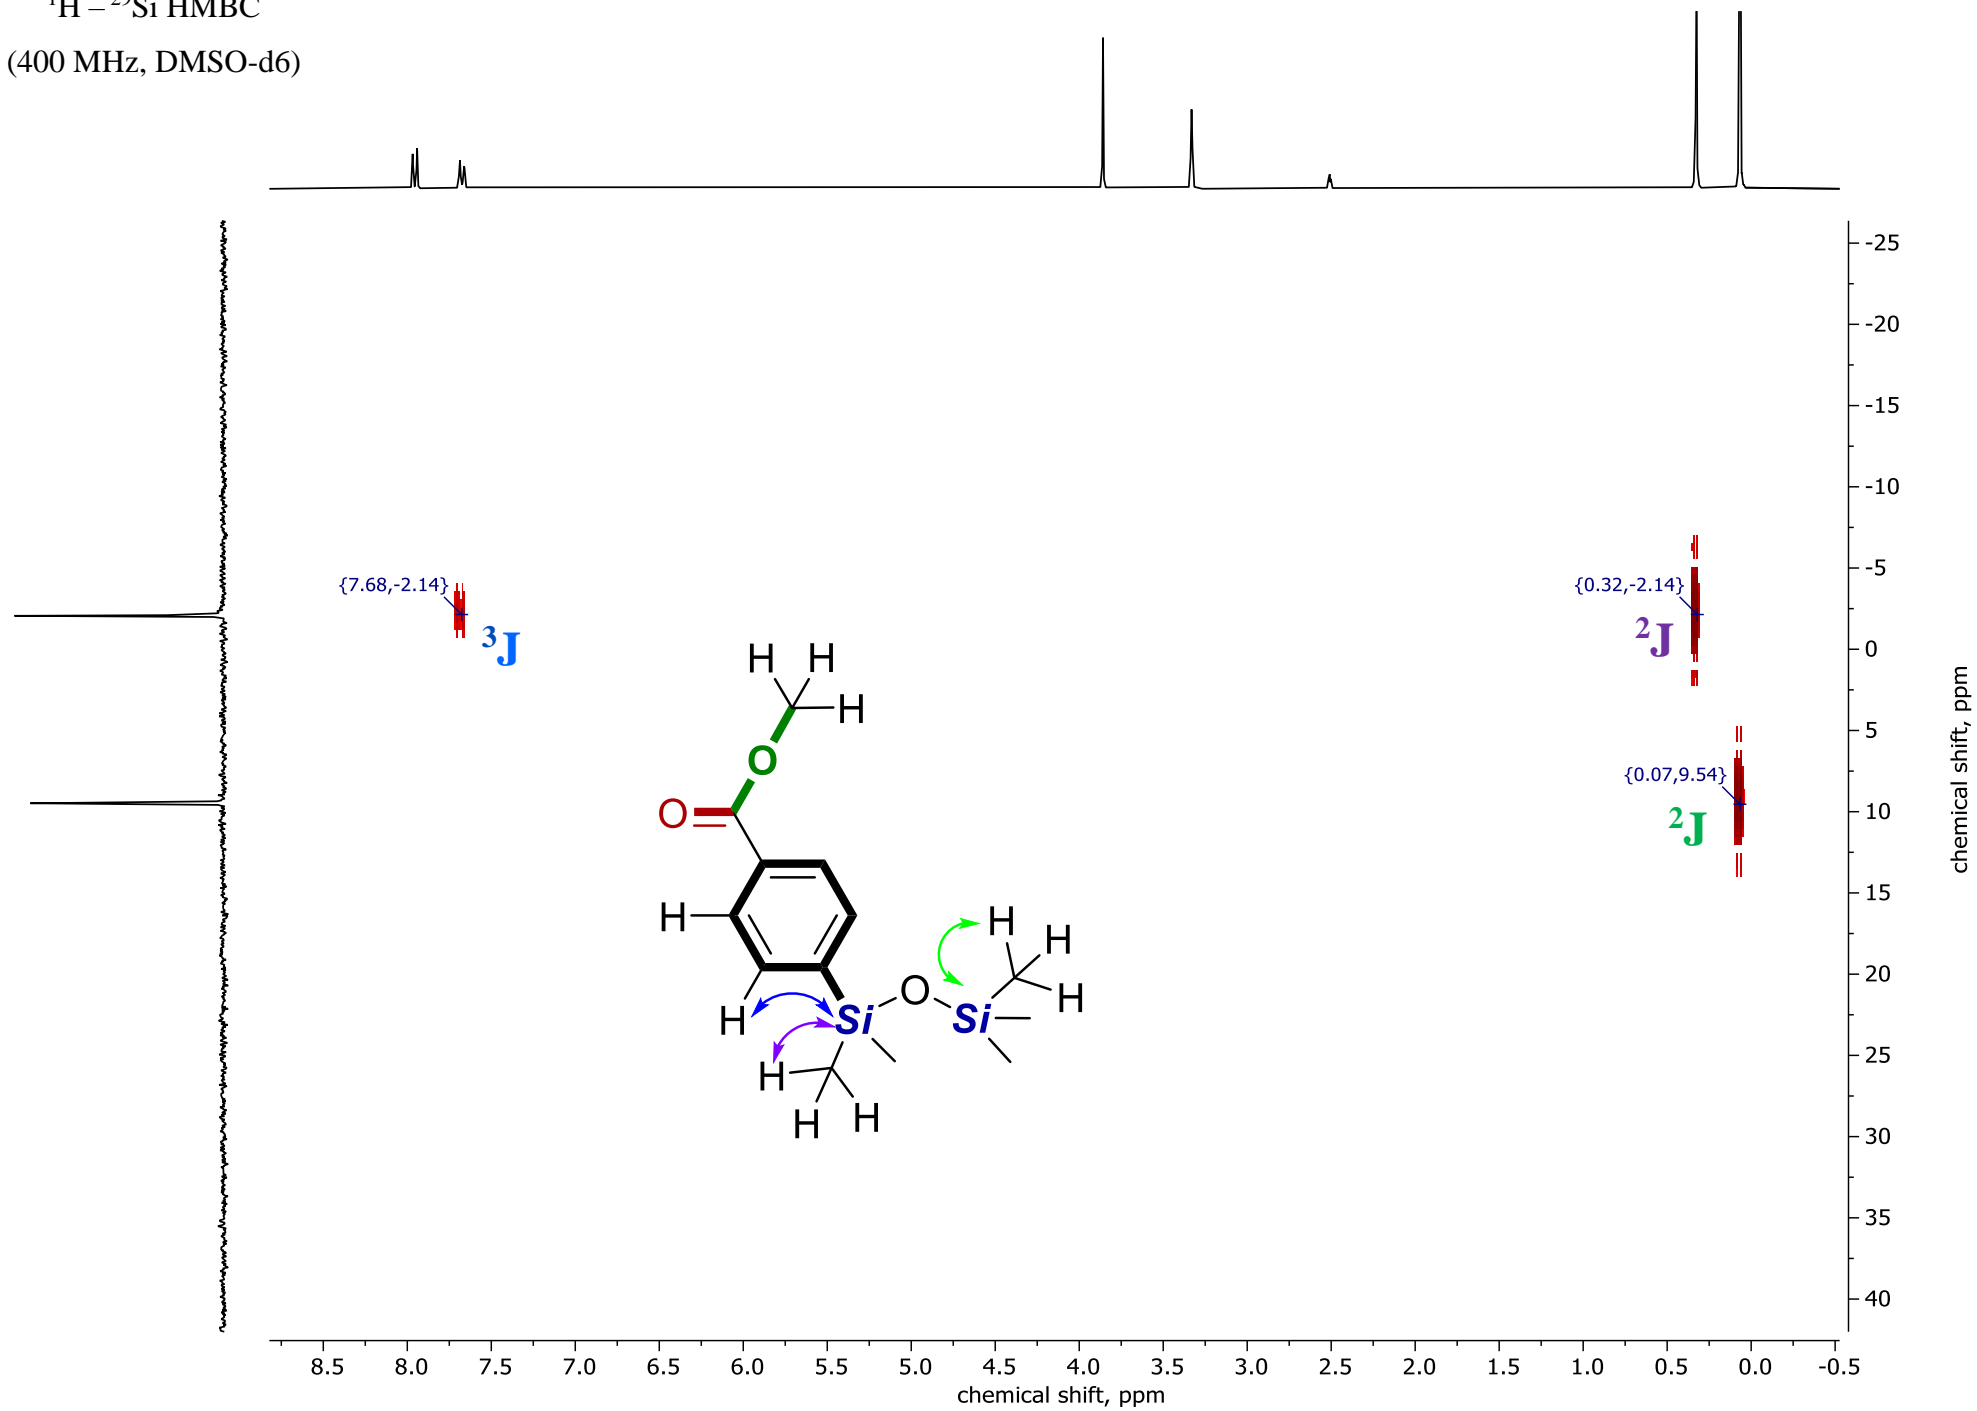

IR spectrum

S18

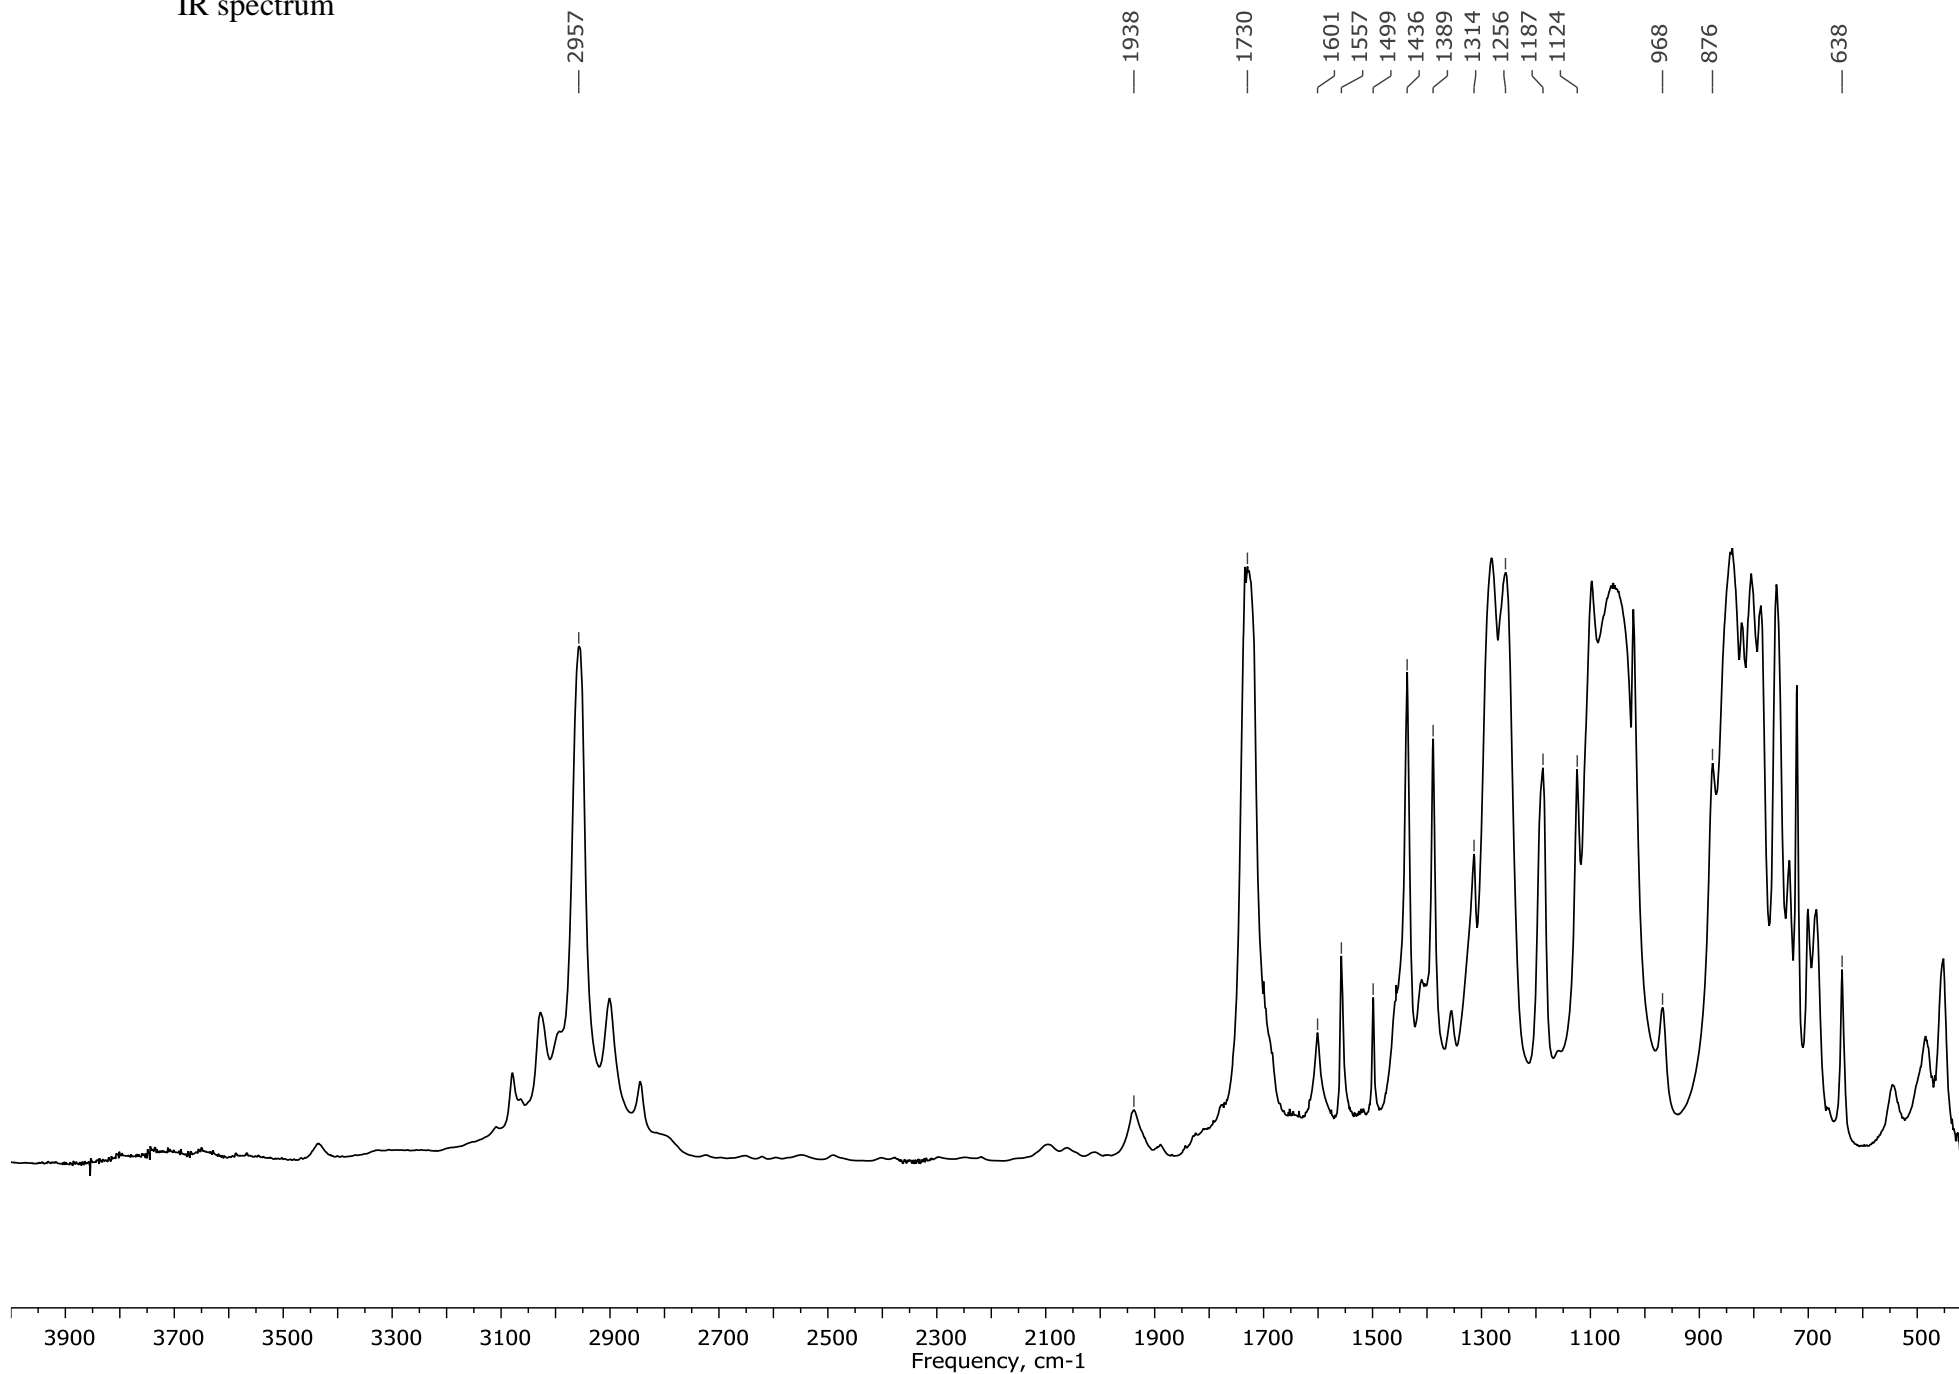

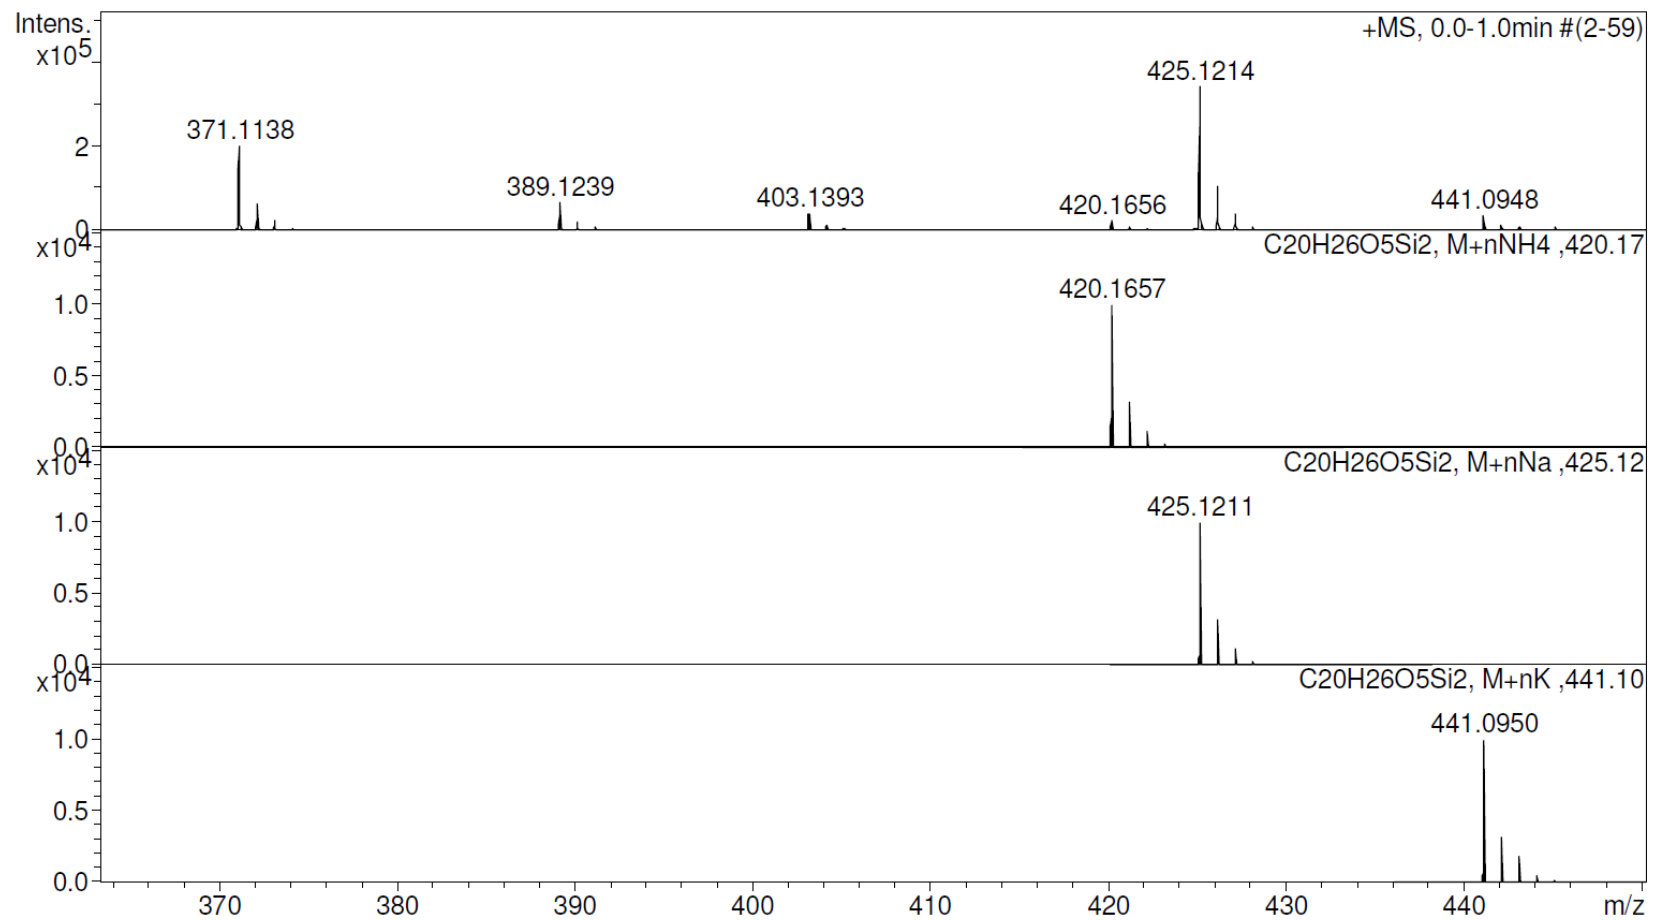

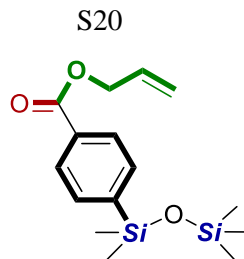

**Characterisation data for allyl 4-(1,1,3,3,3-pentamethyldisiloxanyl)benzoate:**

$^1\text{H}$  NMR (400 MHz,  $\text{DMSO-}d_6$ ):  $\delta = 7.98$  (d,  $^3J = 11\text{ Hz}$ , 2H),  $\delta = 7.69$  (d,  $^3J = 11\text{ Hz}$ , 2H),  $\delta = 6.12$ - $5.99$  (m, 1H),  $\delta = 5.44$ - $5.26$  (m, 2H),  $\delta = 4.81$  (m, 2H),  $\delta = 0.33$  (s, 6H),  $\delta = 0.07$  (s, 8H).  $^{13}\text{C}$  NMR (100 MHz,  $\text{DMSO-}d_6$ ):  $\delta = 165.39$ ,  $145.77$ ,  $133.11$ ,  $132.58$ ,  $130.27$ ,  $128.20$ ,  $117.82$ ,  $65.04$ ,  $1.91$ ,  $0.60$ .  $^{29}\text{Si}$  NMR (80 MHz,  $\text{DMSO-}d_6$ ):  $\delta = 9.54$ ,  $-2.03$ . HRMS (ESI)  $m/z$   $z$   $[\text{M} + \text{H}]^+$ : calcd for  $[\text{C}_{15}\text{H}_{24}\text{O}_3\text{Si}_2 + \text{H}]^+$ ,  $309.1337$ ; found,  $309.1328$ ;  $[\text{M} + \text{Na}]^+$ : calcd for  $[\text{C}_{15}\text{H}_{24}\text{O}_3\text{Si}_2 + \text{Na}]^+$ ,  $331.1156$ ; found,  $331.1154$ . IR ( $\text{cm}^{-1}$ ):  $2958$ ,  $1724$ ,  $1558$ ,  $1389$ ,  $1275$ ,  $1186$ ,  $1095$ - $975$ ,  $932$ ,  $876$ - $638$ .

<sup>1</sup>H NMR

(400 MHz, DMSO-d6)

S21

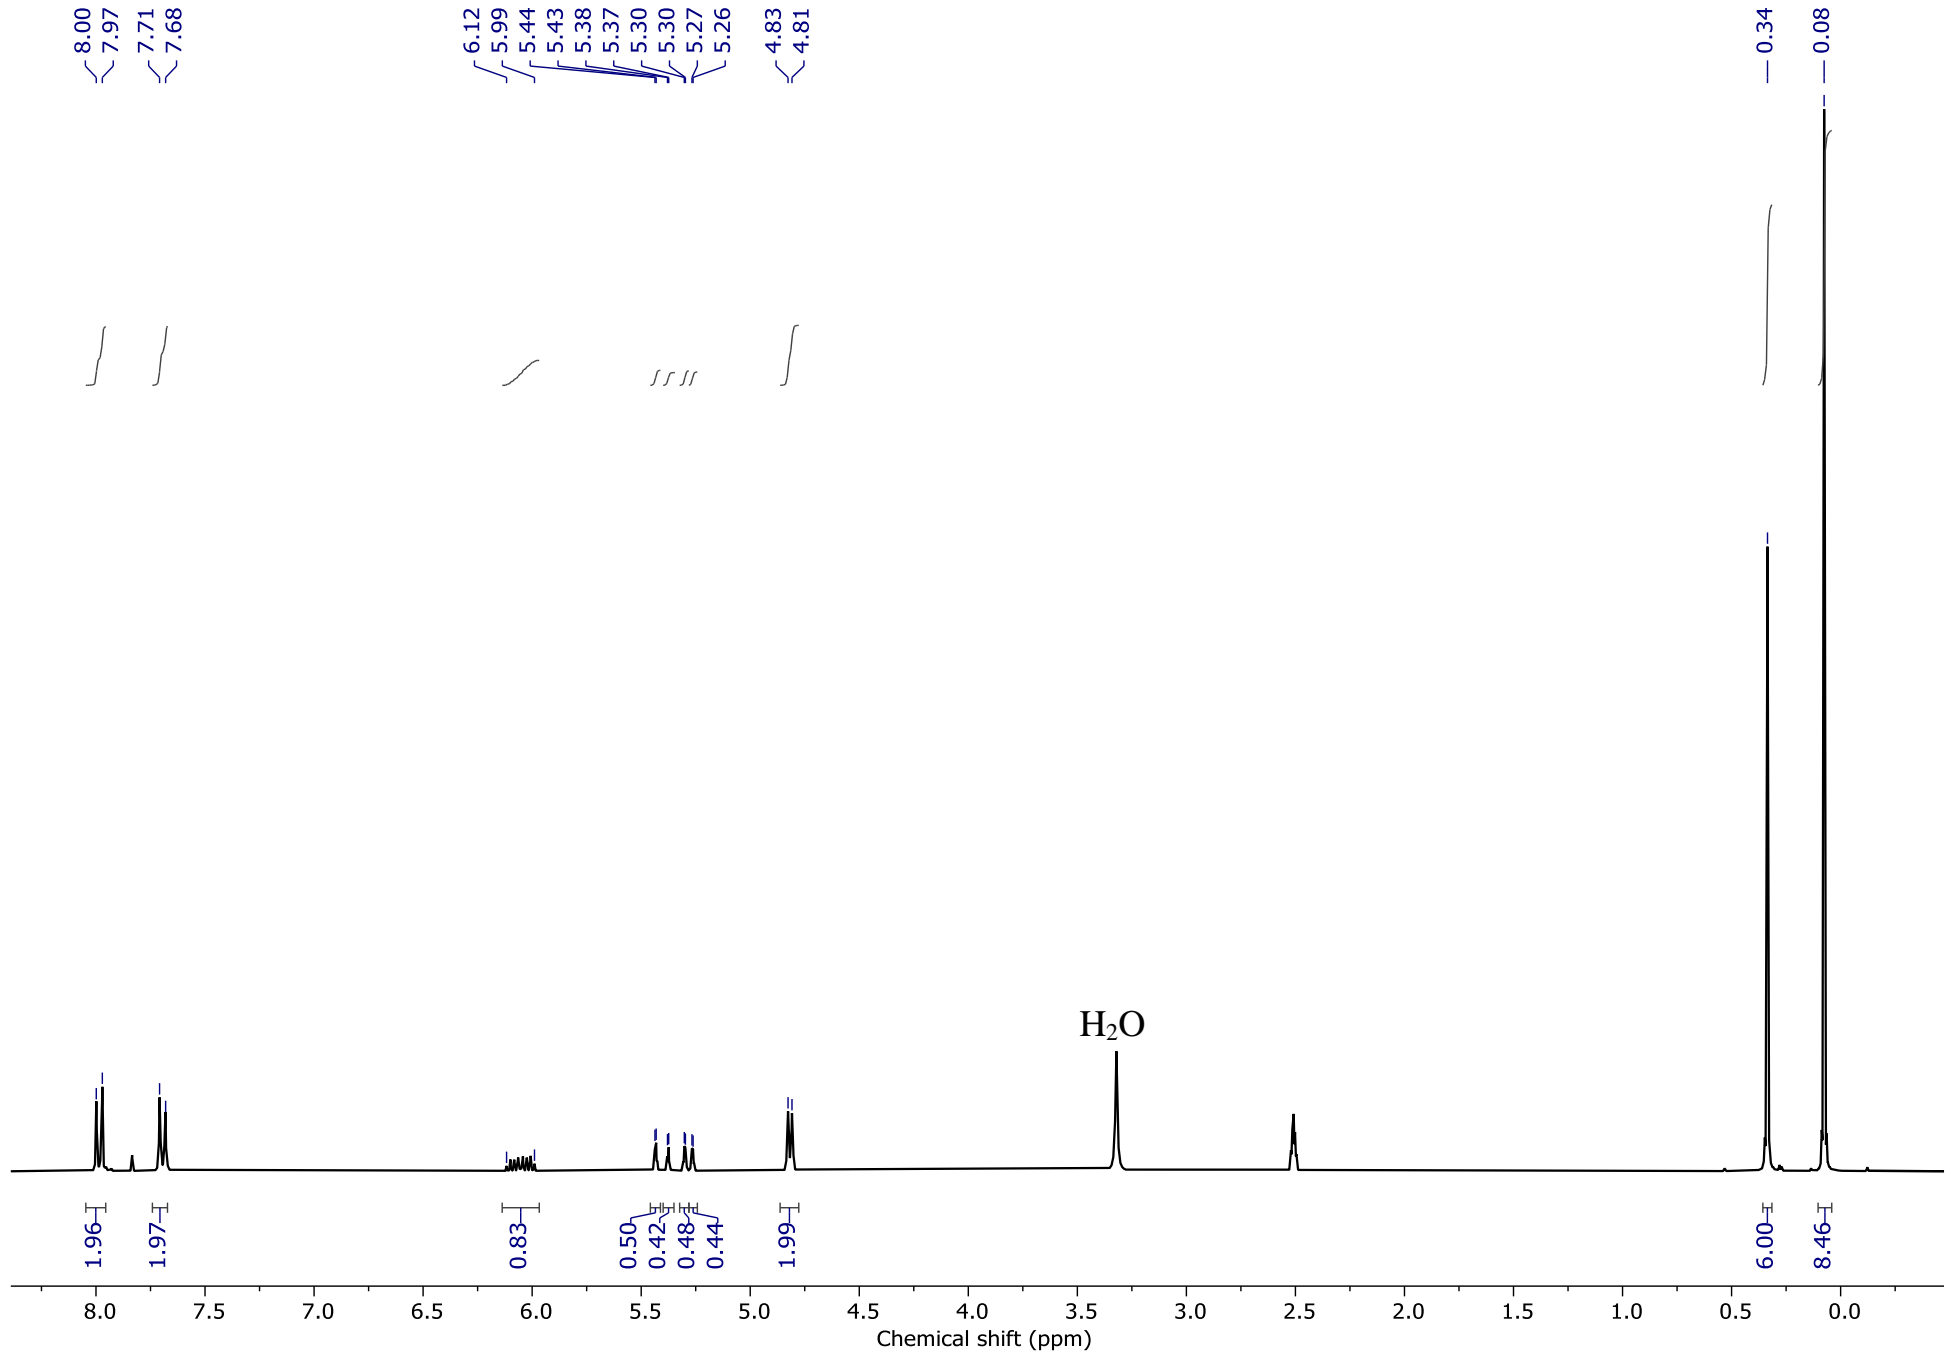

<sup>13</sup>C NMR

(100 MHz, DMSO-d6)

S22

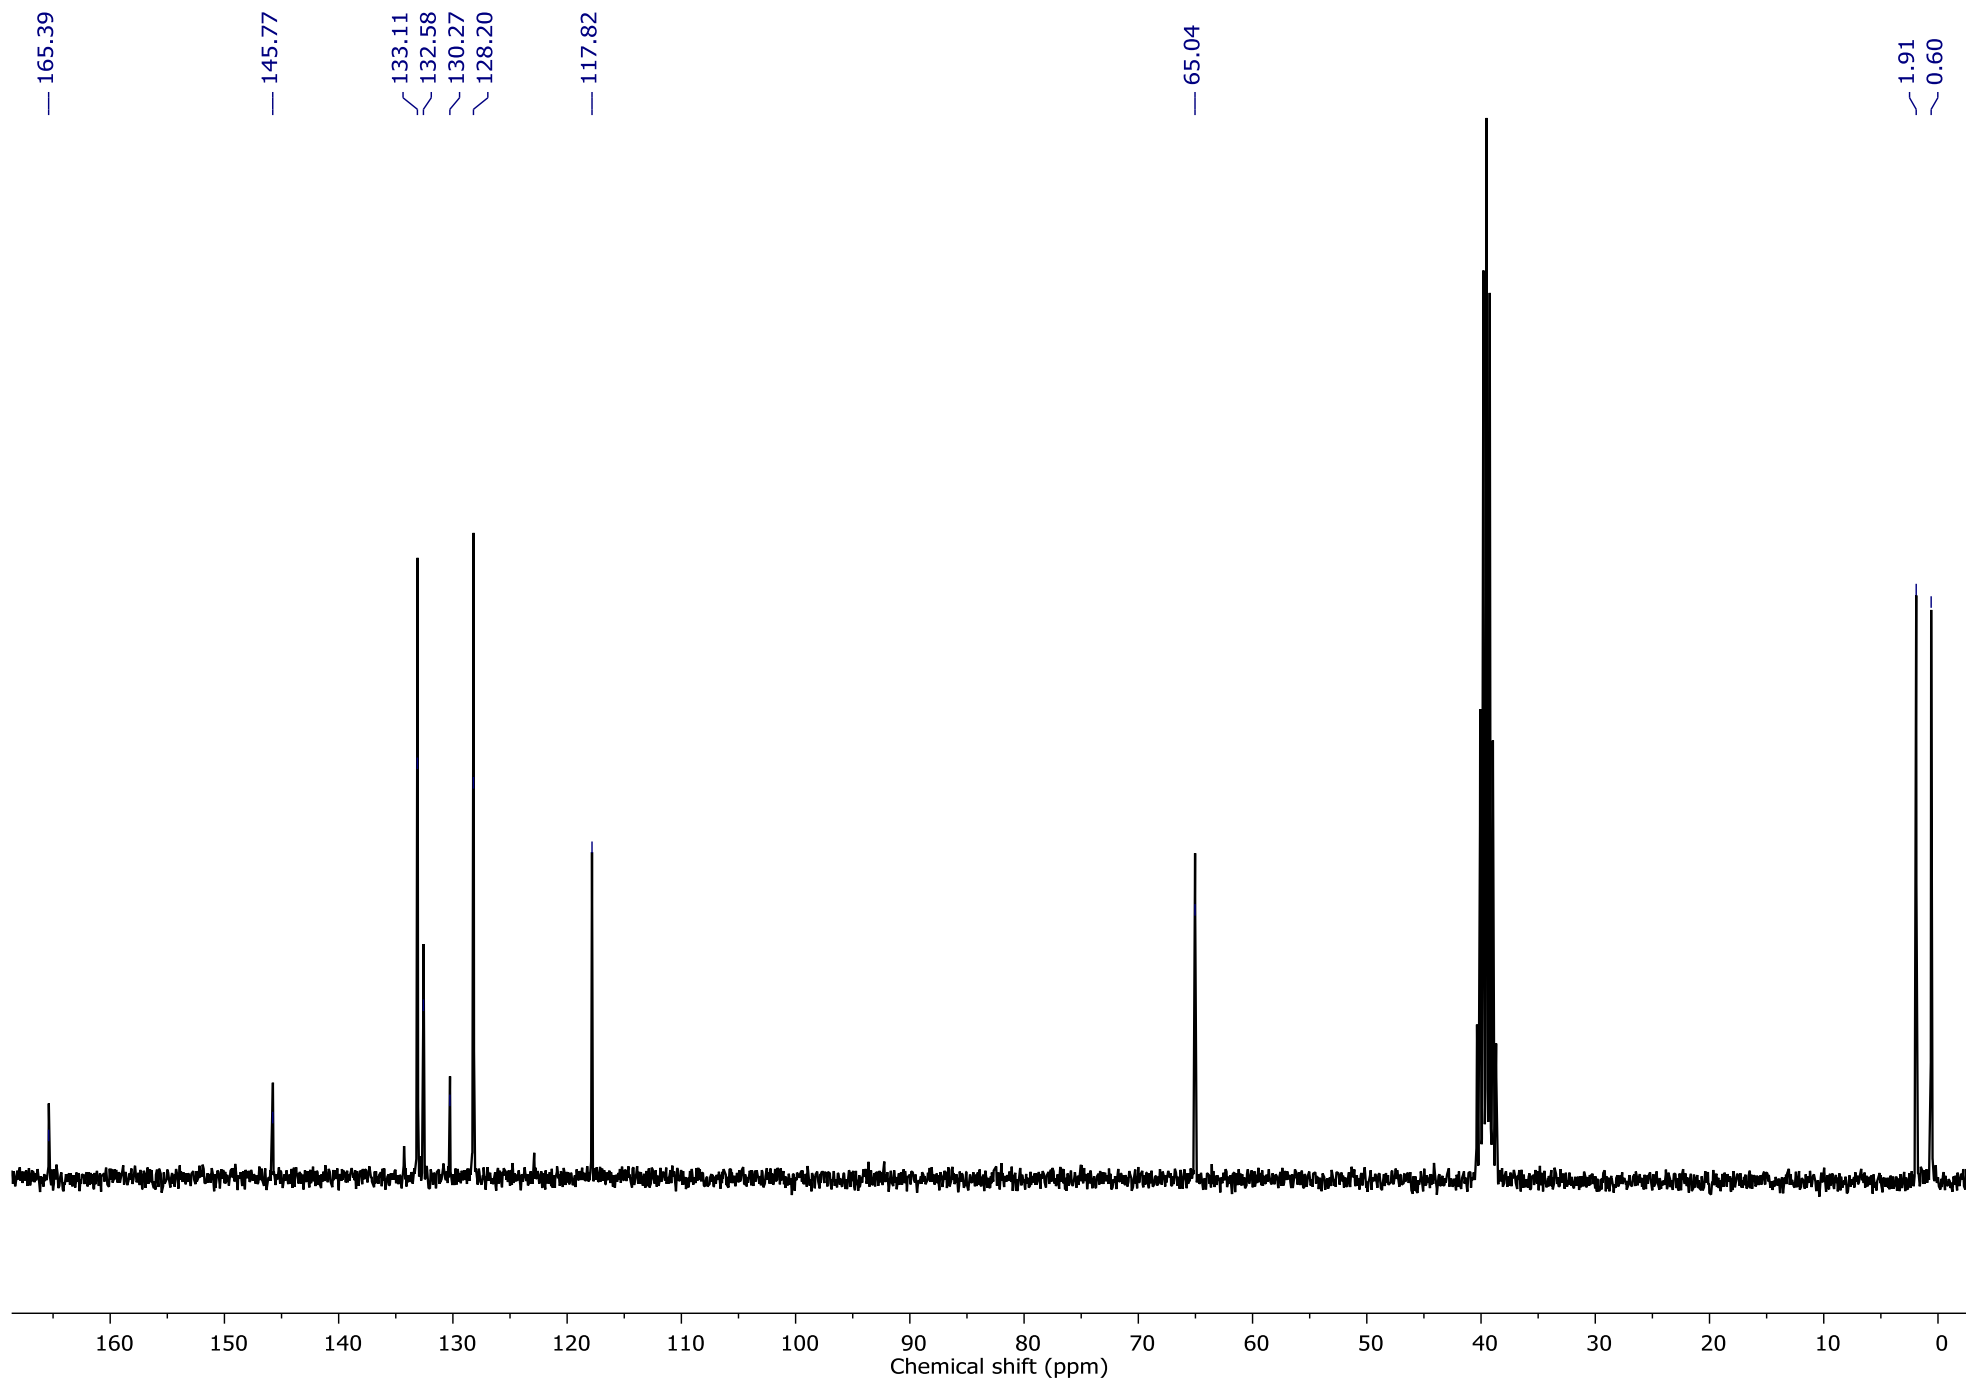

$^{29}\text{Si}$  NMR  
(80 MHz, DMSO-d<sub>6</sub>)

S23

9.54  
-2.03

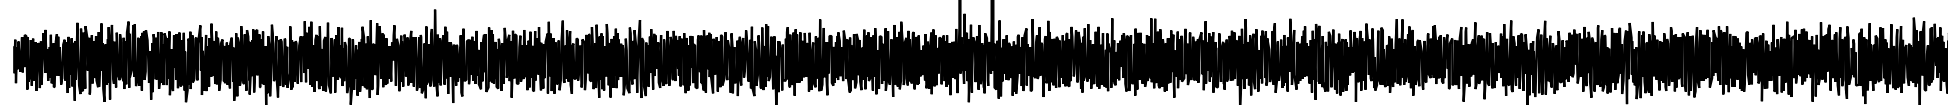

Chemical shift (ppm)

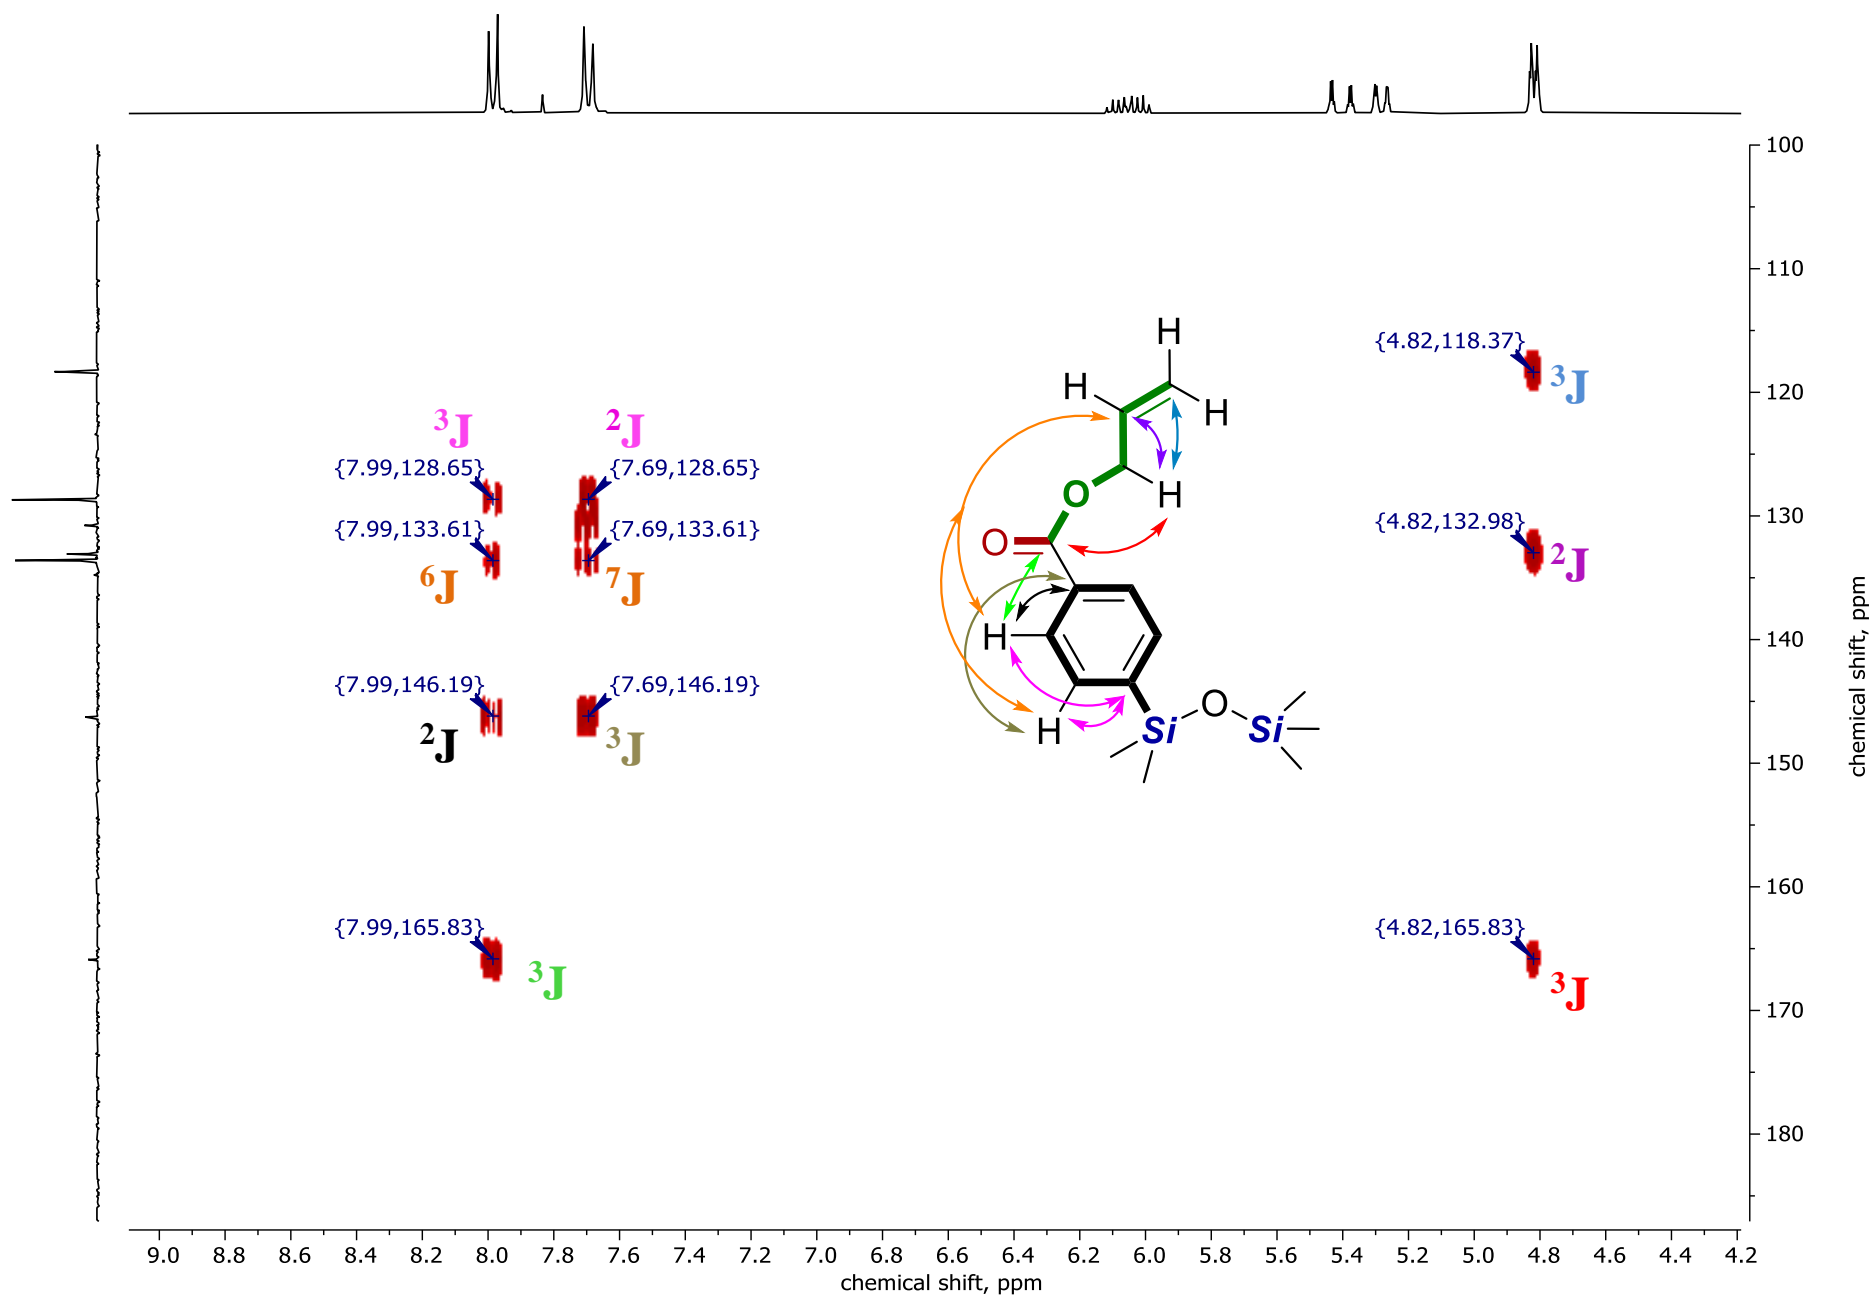



$^1\text{H} - ^{13}\text{C}$  HSQC  
(400 MHz, DMSO- $d_6$ )

S25

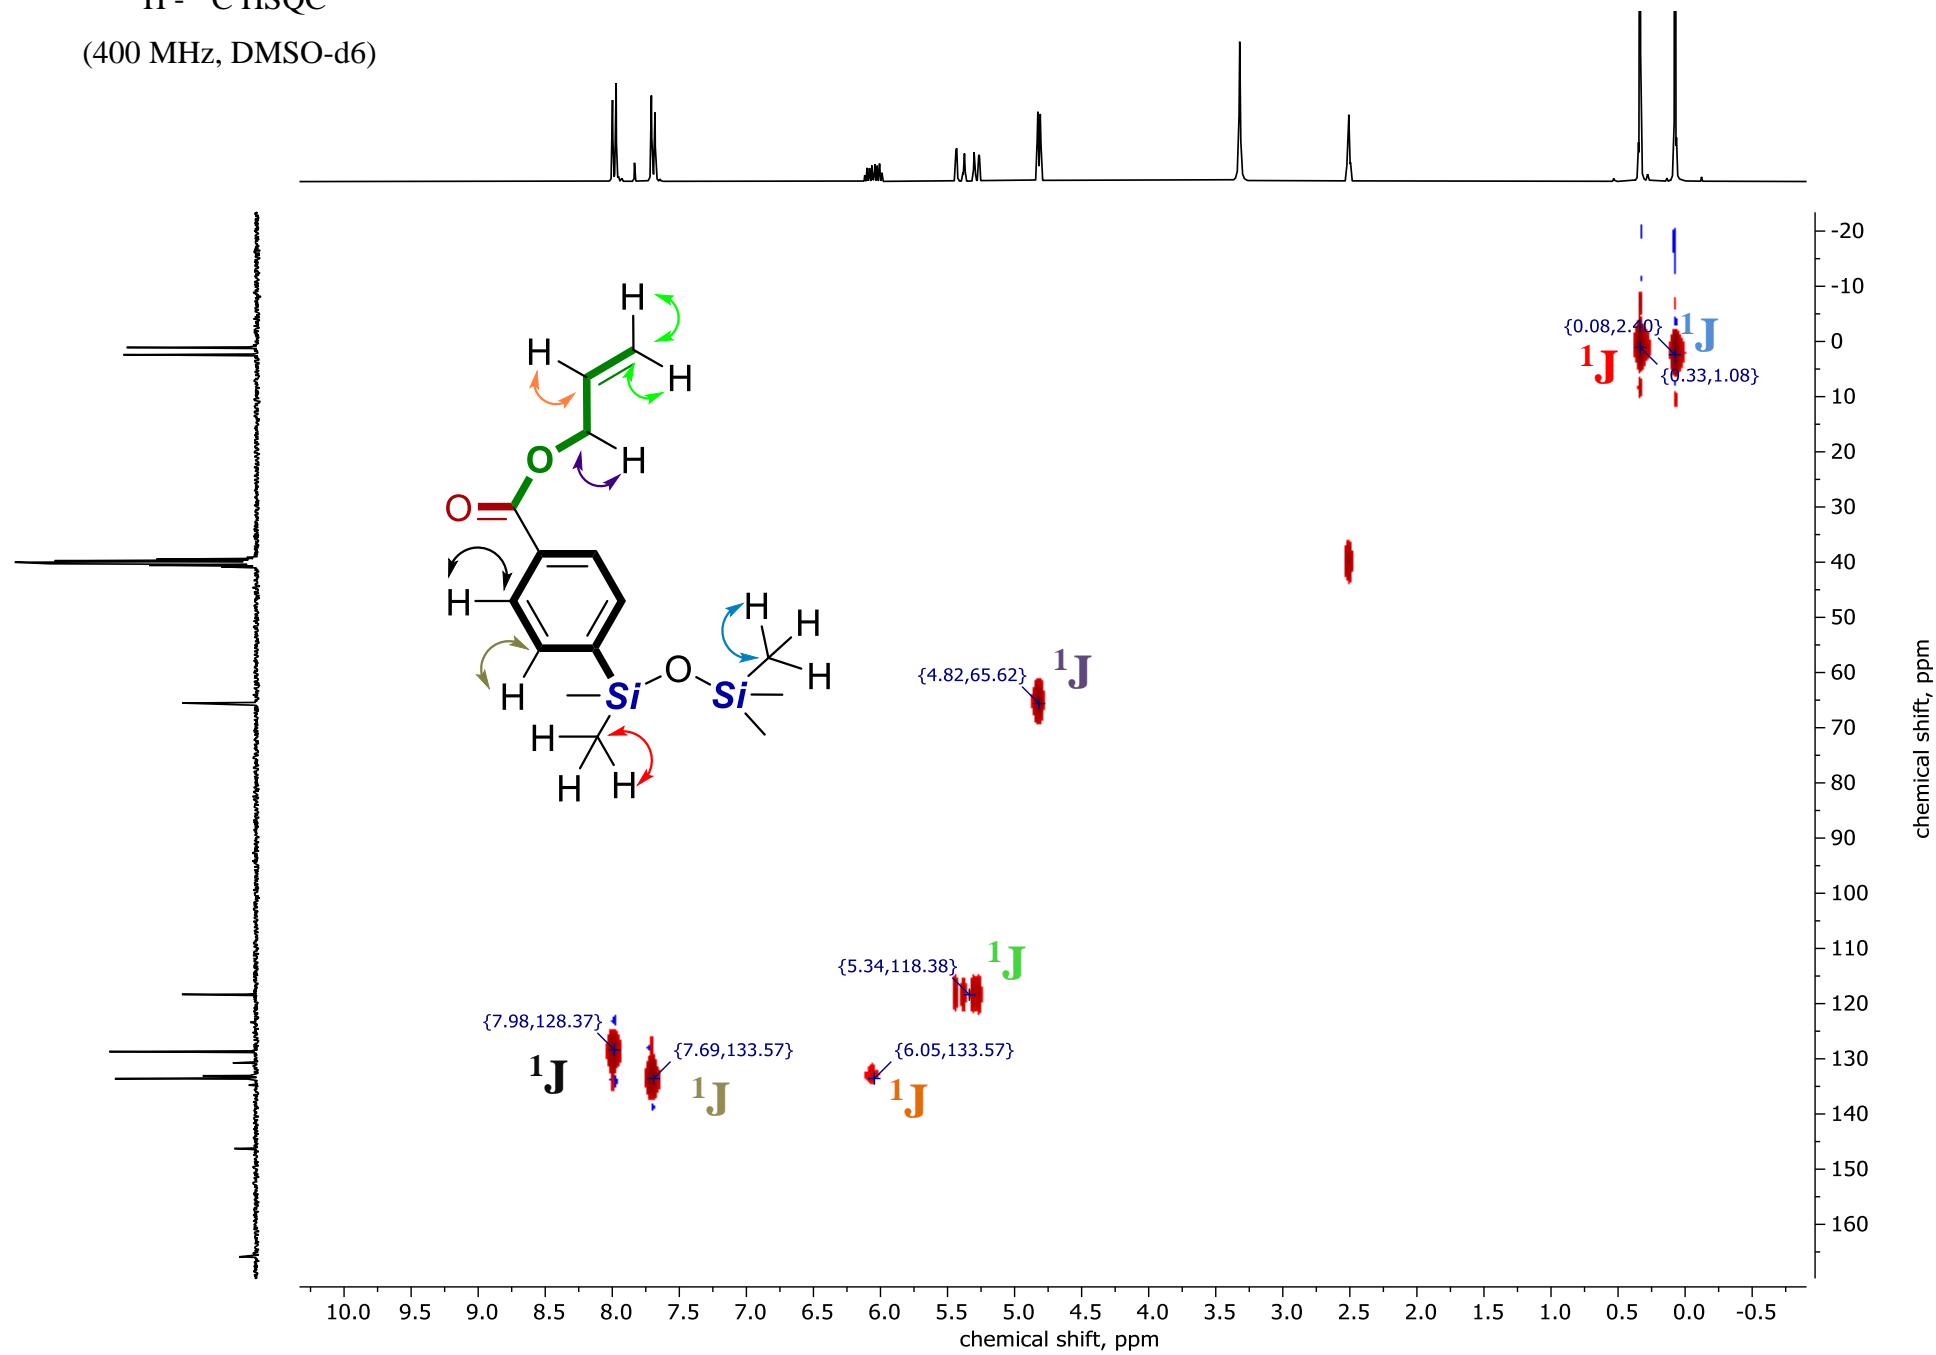

$^1\text{H} - ^{29}\text{Si}$  HMBC  
(400 MHz, DMSO-d<sub>6</sub>)

S26

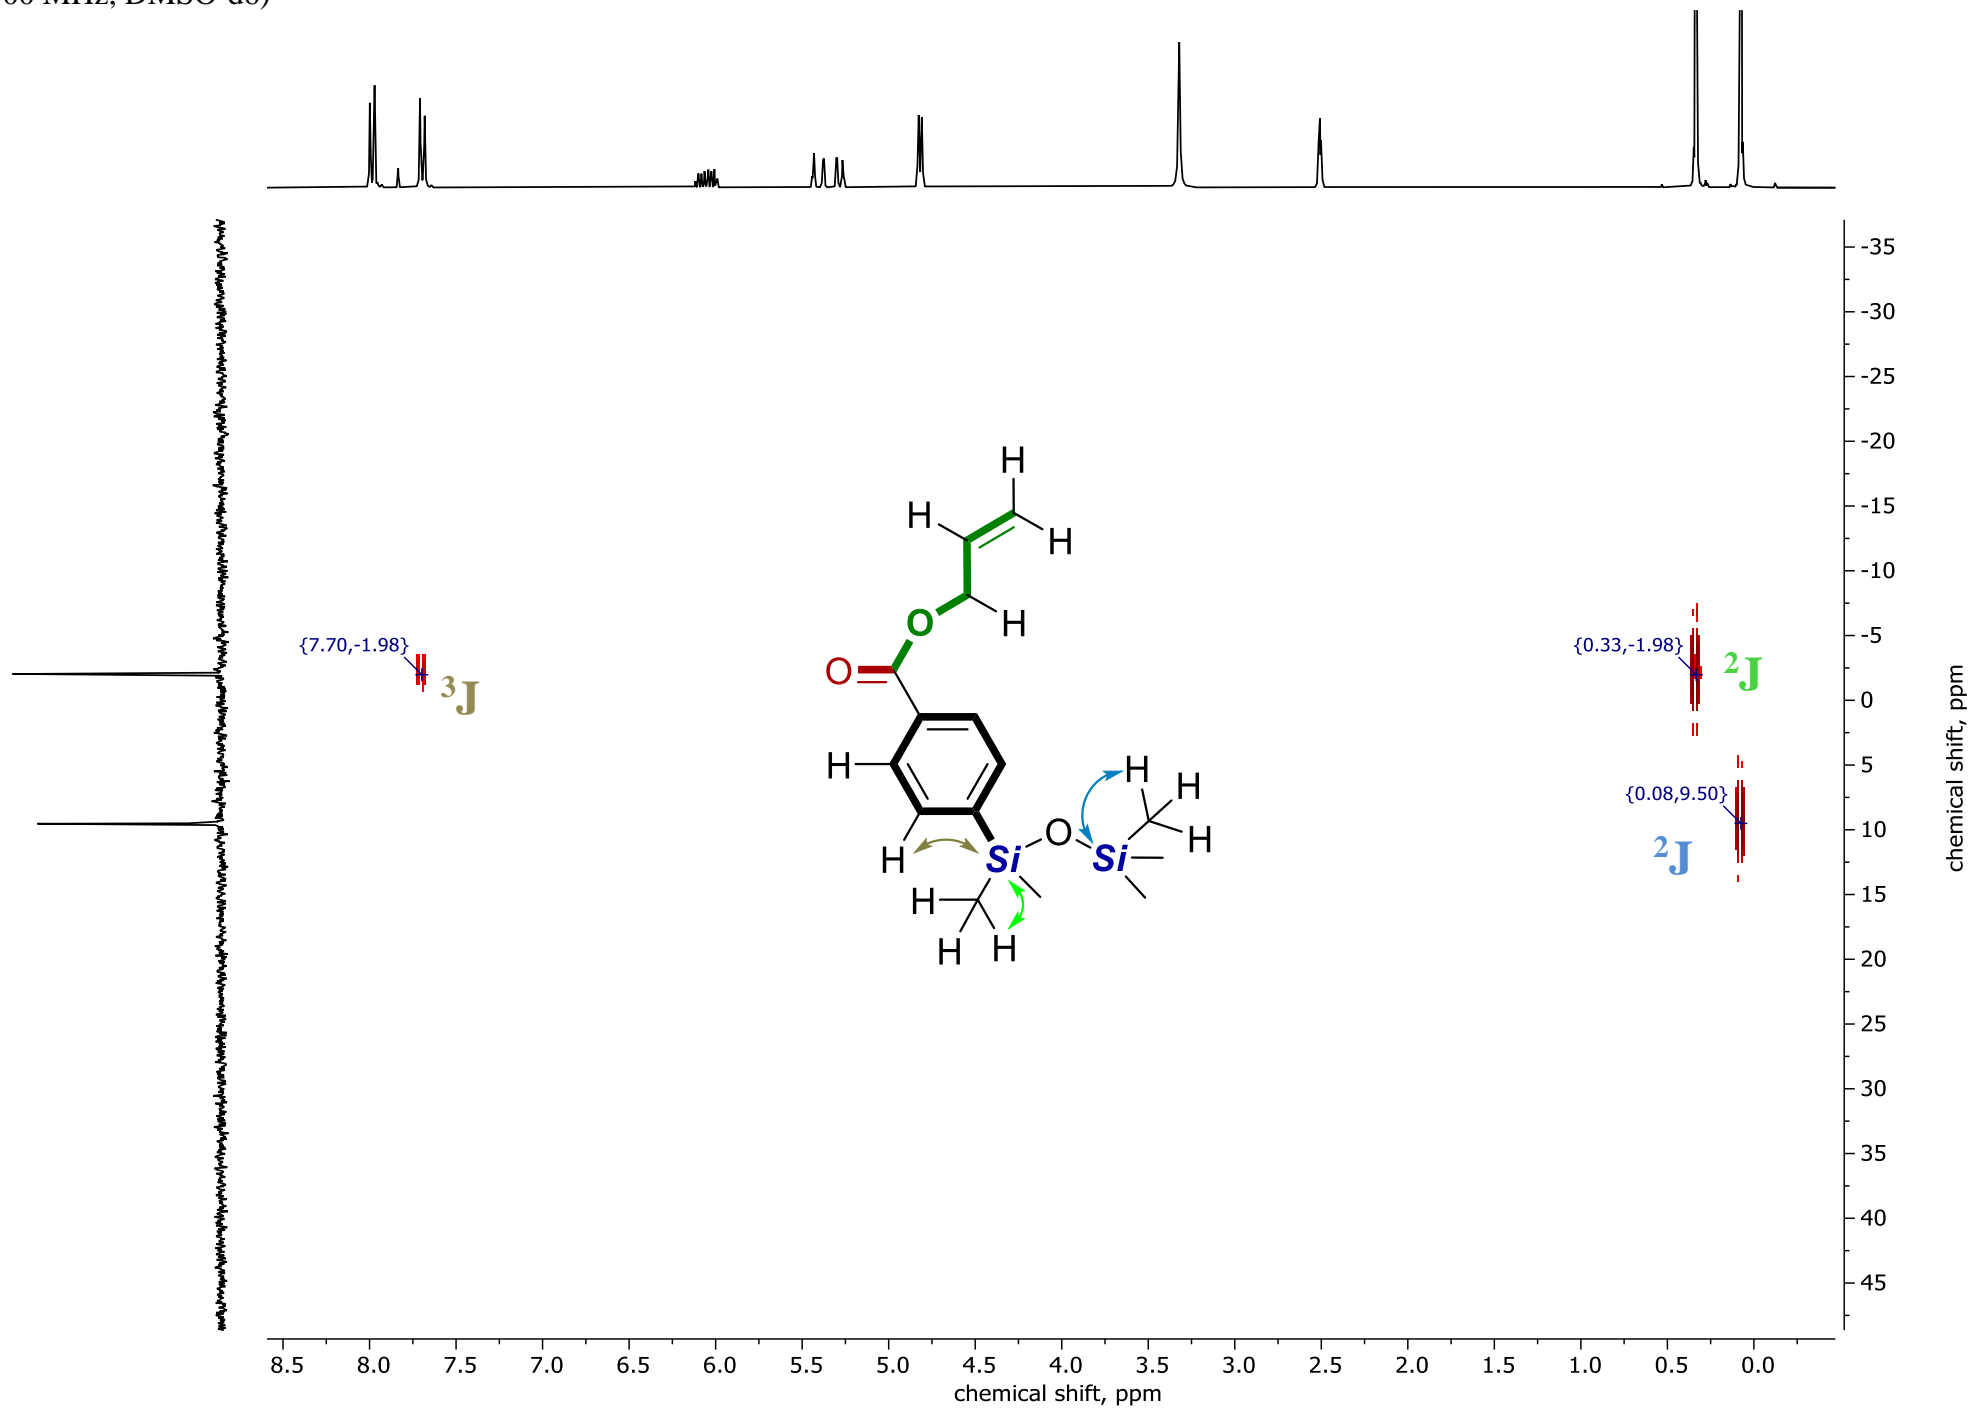

IR spectrum

S27

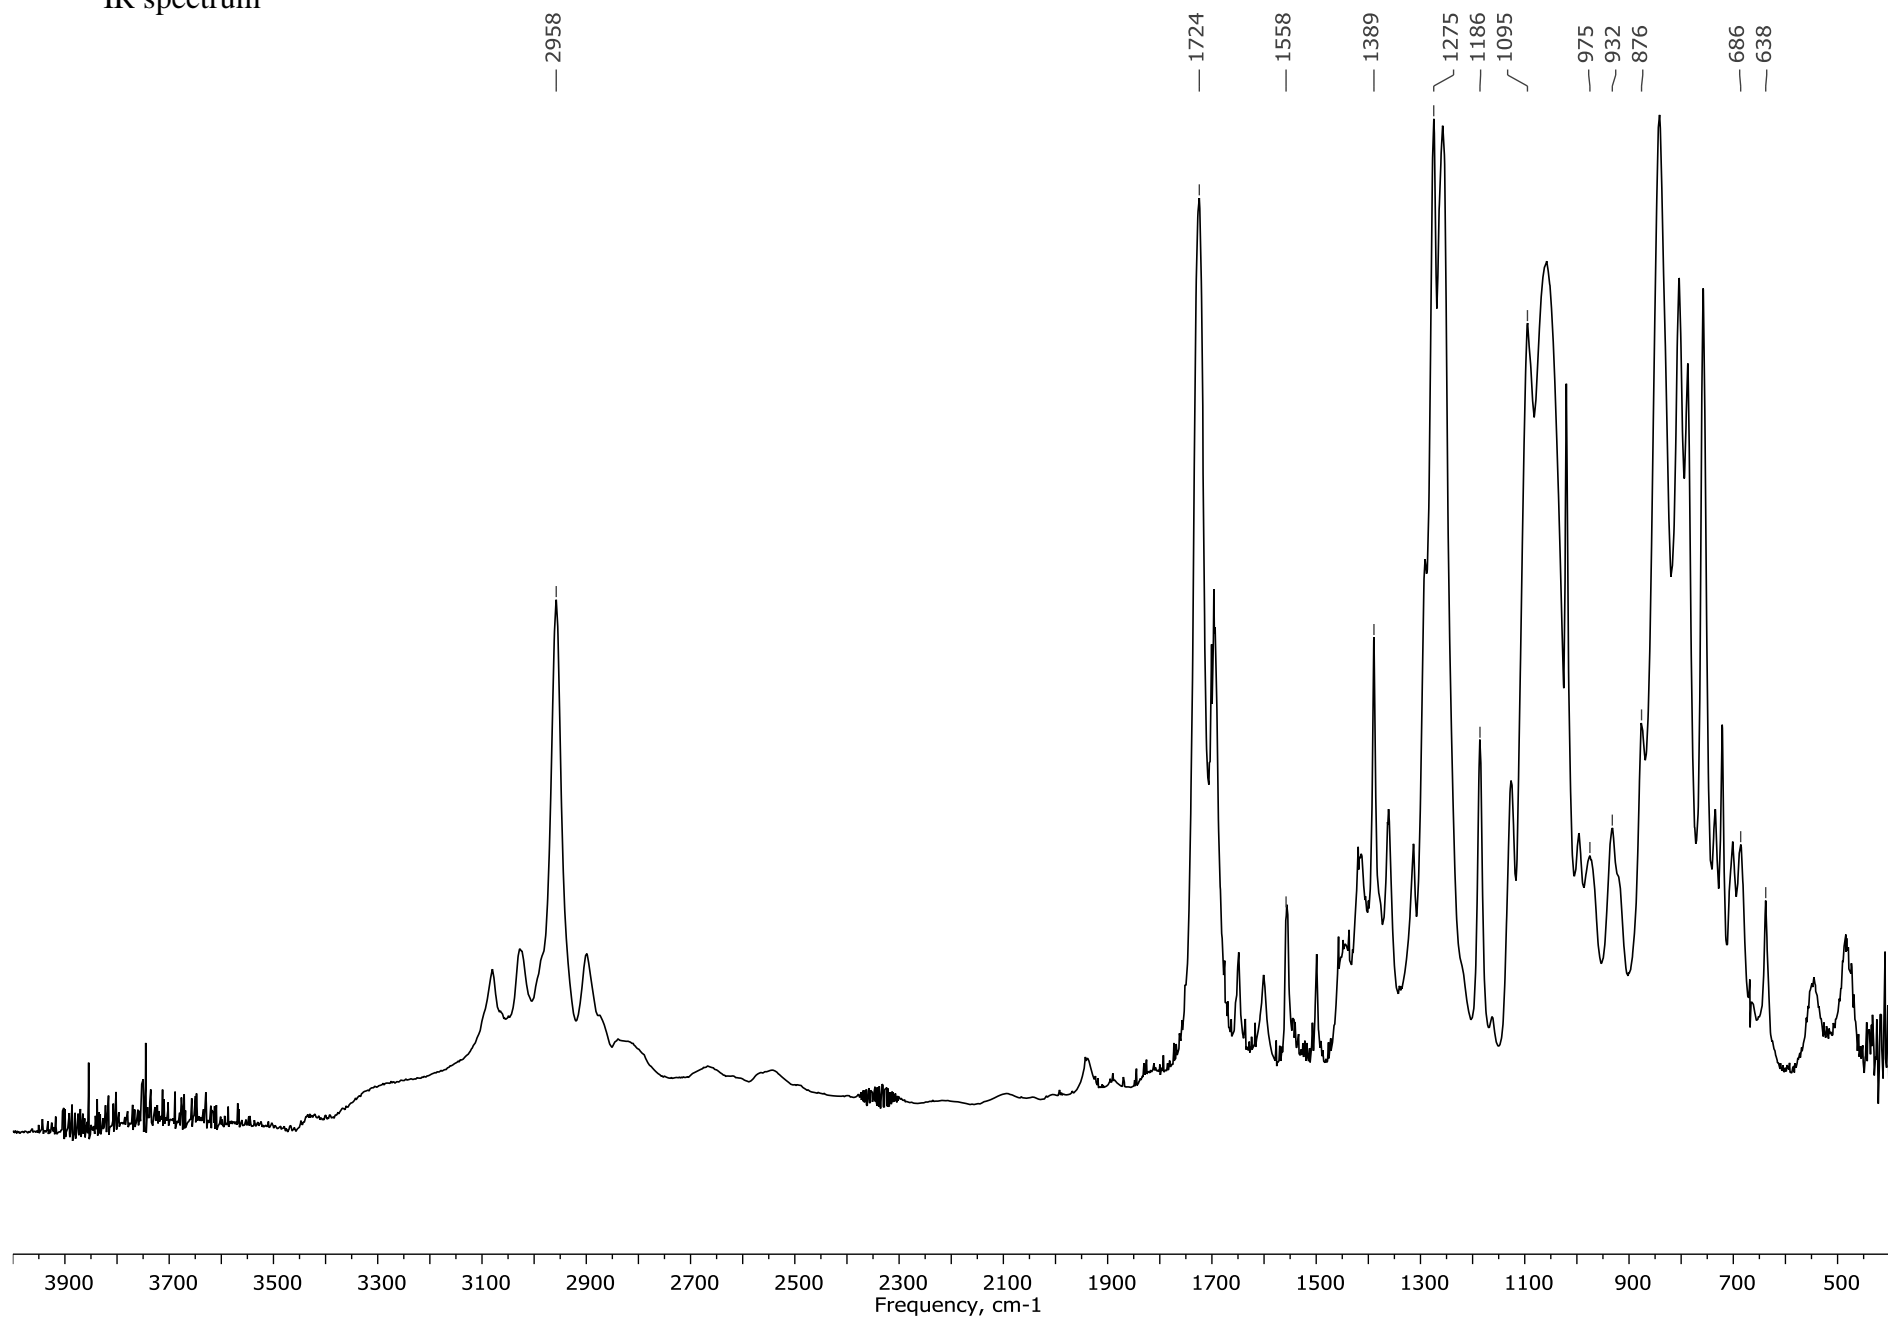

## HRMS (ESI)

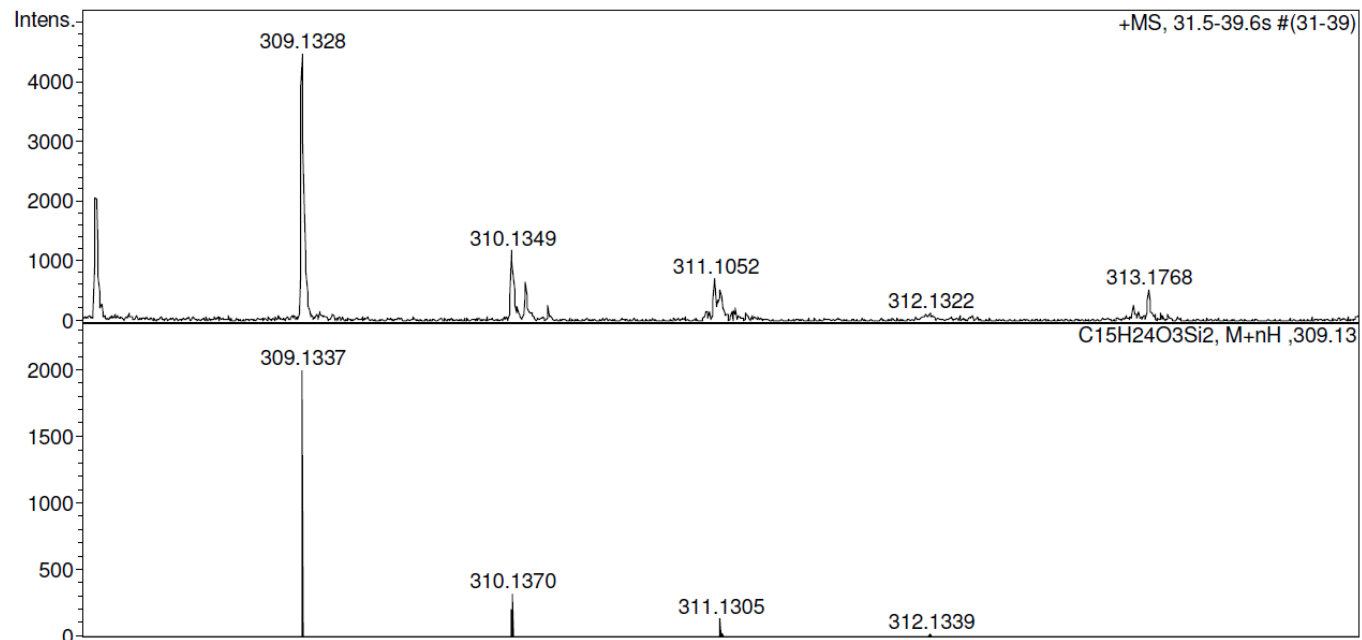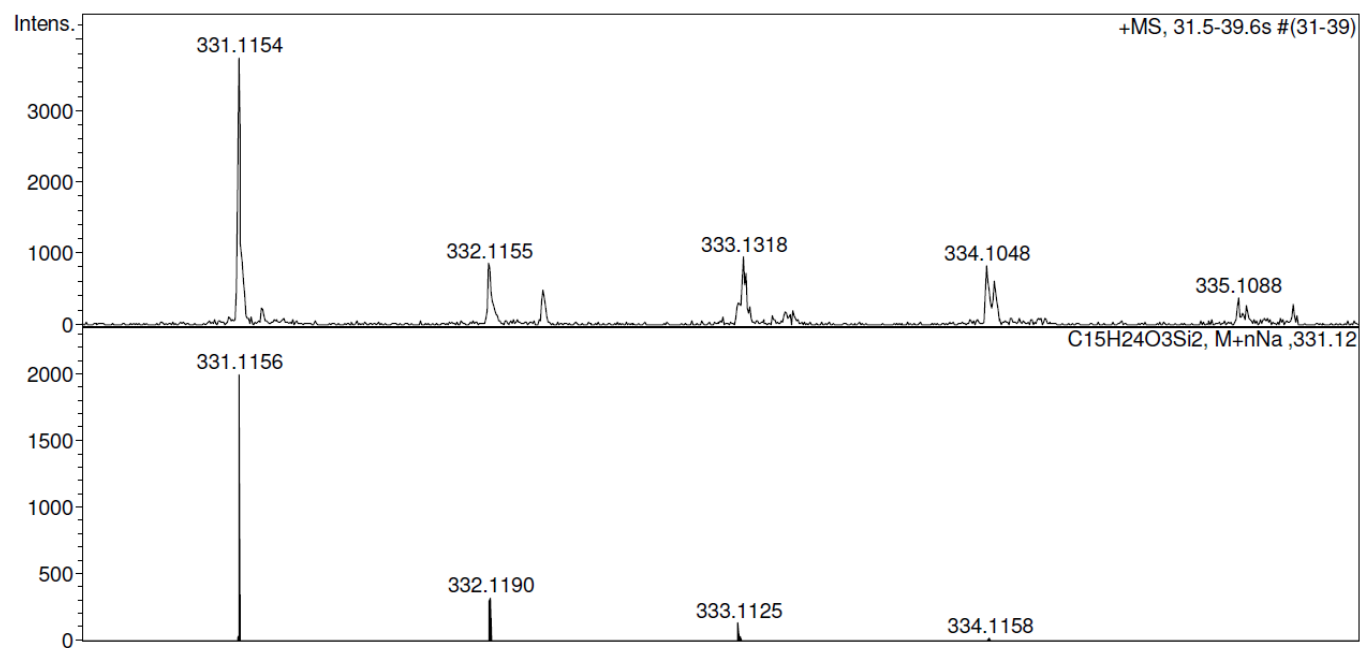

S29

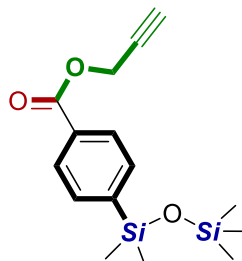

**Characterisation data for prop-2-yn-1-yl 4-(1,1,3,3,3-pentamethyldisiloxanyl)benzoate:**

$^1\text{H}$  NMR (400 MHz,  $\text{DMSO-}d_6$ ):  $\delta = 7.96$  (d,  $^3J=11$  Hz, 2H),  $\delta = 7.71$  (d,  $^3J=11$  Hz, 2H),  $\delta = 4.97$  (d,  $^4J=3$  Hz, 2H),  $\delta = 3.61$  (m, 1H),  $\delta = 0.34$  (s, 6H),  $\delta = 0.07$  (s, 9H).  $^{13}\text{C}$  NMR (100 MHz,  $\text{DMSO-}d_6$ ):  $\delta = 165.48$ , 146.59, 133.62, 130.14, 128.74, 78.78, 78.38, 52.94, 2.37, 1.05.  $^{29}\text{Si}$  NMR (80 MHz,  $\text{DMSO-}d_6$ ):  $\delta = -9.57$ , -2.04. IR ( $\text{cm}^{-1}$ ): 3310, 2958, 1730, 1389, 1274, 1259, 1186, 1123-982, 876-788, 757-638.

<sup>1</sup>H NMR

(400 MHz, DMSO-d6)

S30

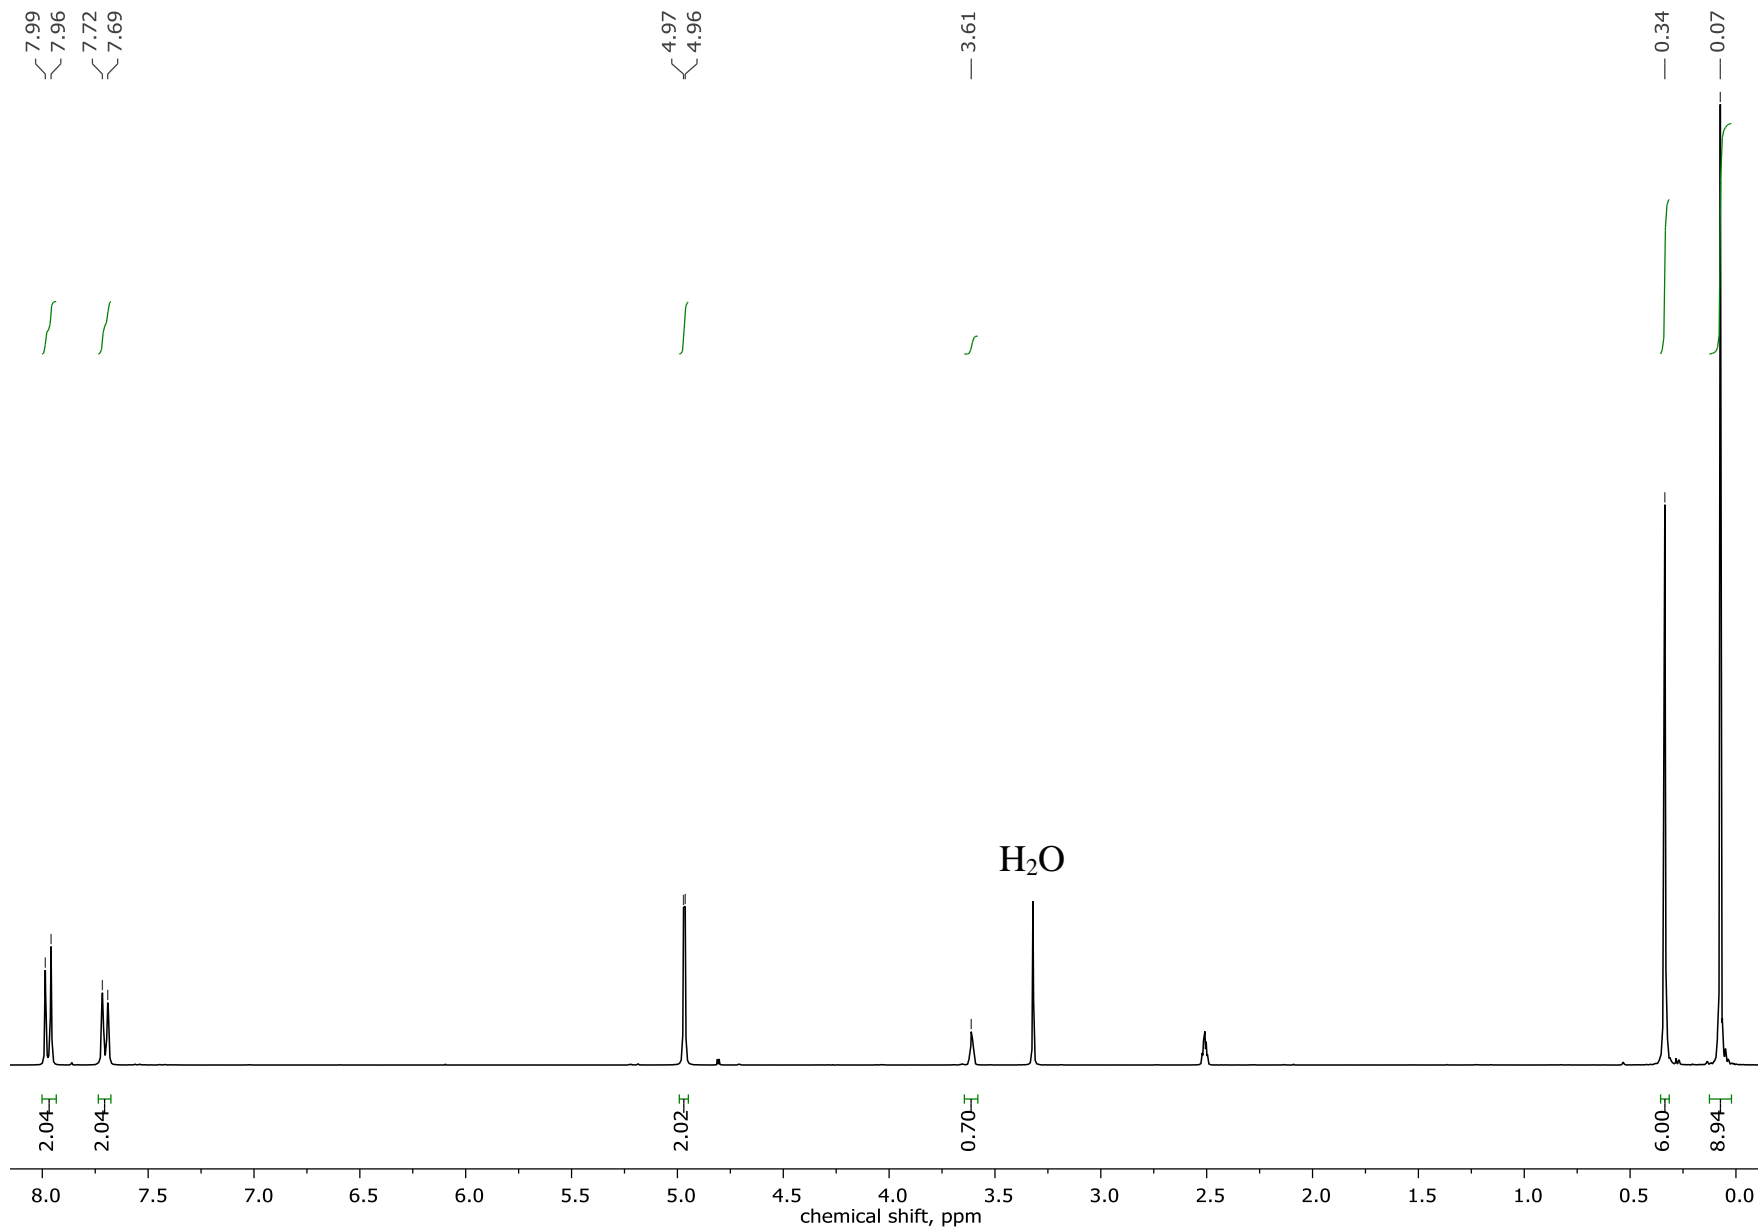

<sup>13</sup>C NMR

(100 MHz, DMSO-d6)

S31

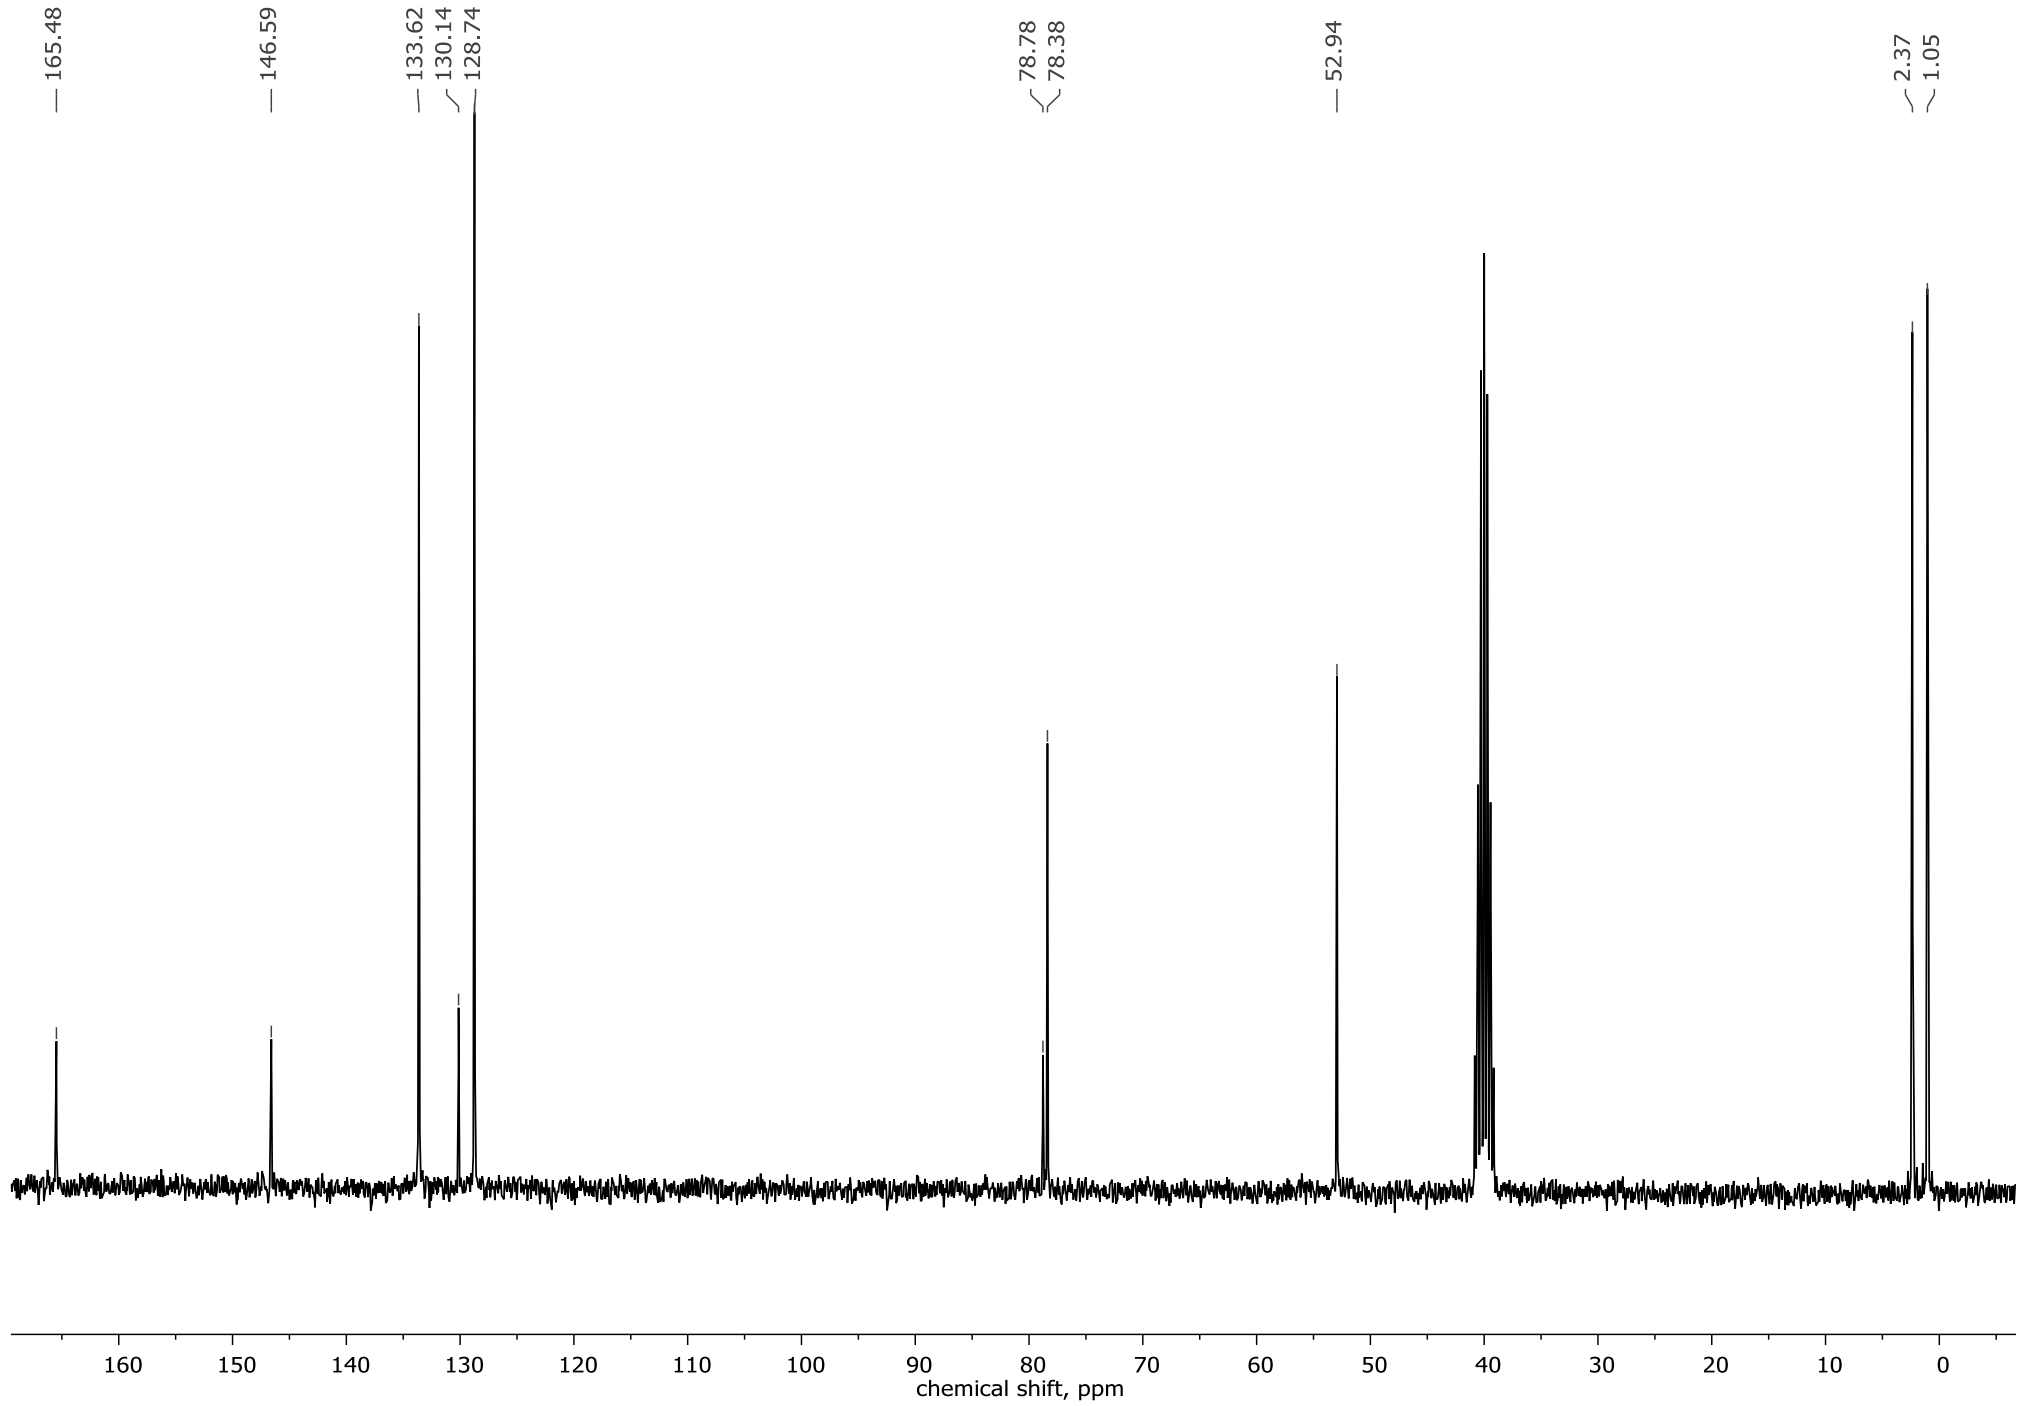

$^{29}\text{Si}$  NMR  
(80 MHz, DMSO-d6)

S32

9.57  
-2.04

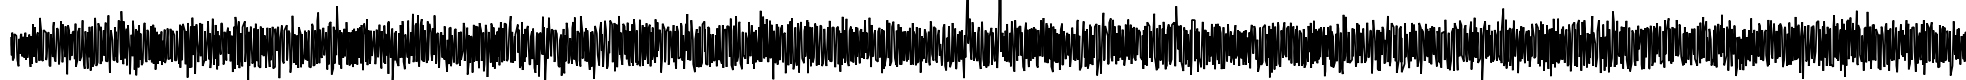

300

250

200

150

100

50

chemical shift, ppm

-50

-100

-150

-200

-250

-300



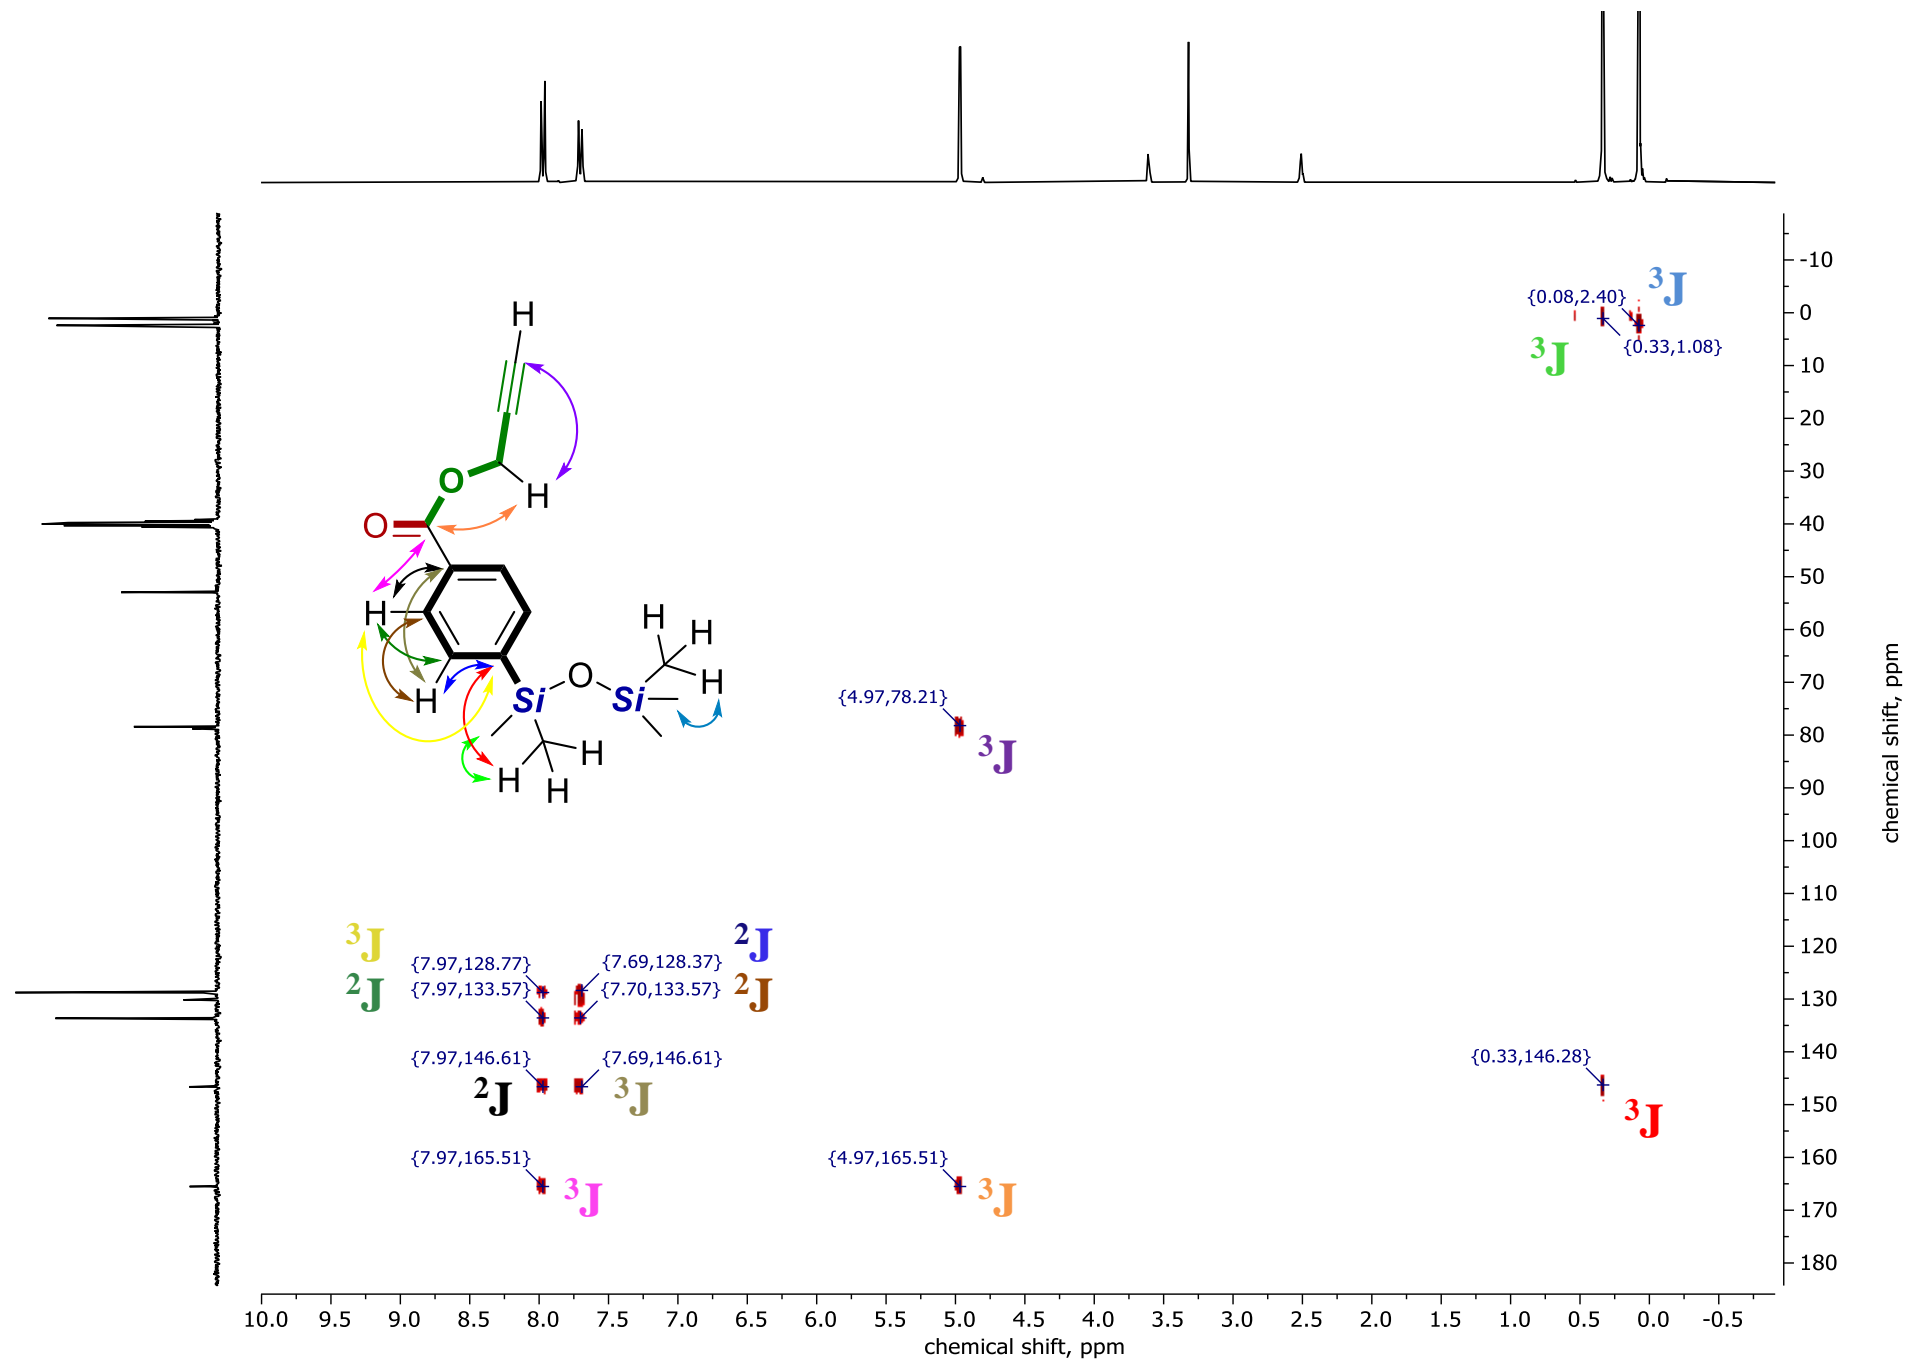

$^1\text{H} - ^{13}\text{C}$  HSQC  
(400 MHz, DMSO-d<sub>6</sub>)

S34

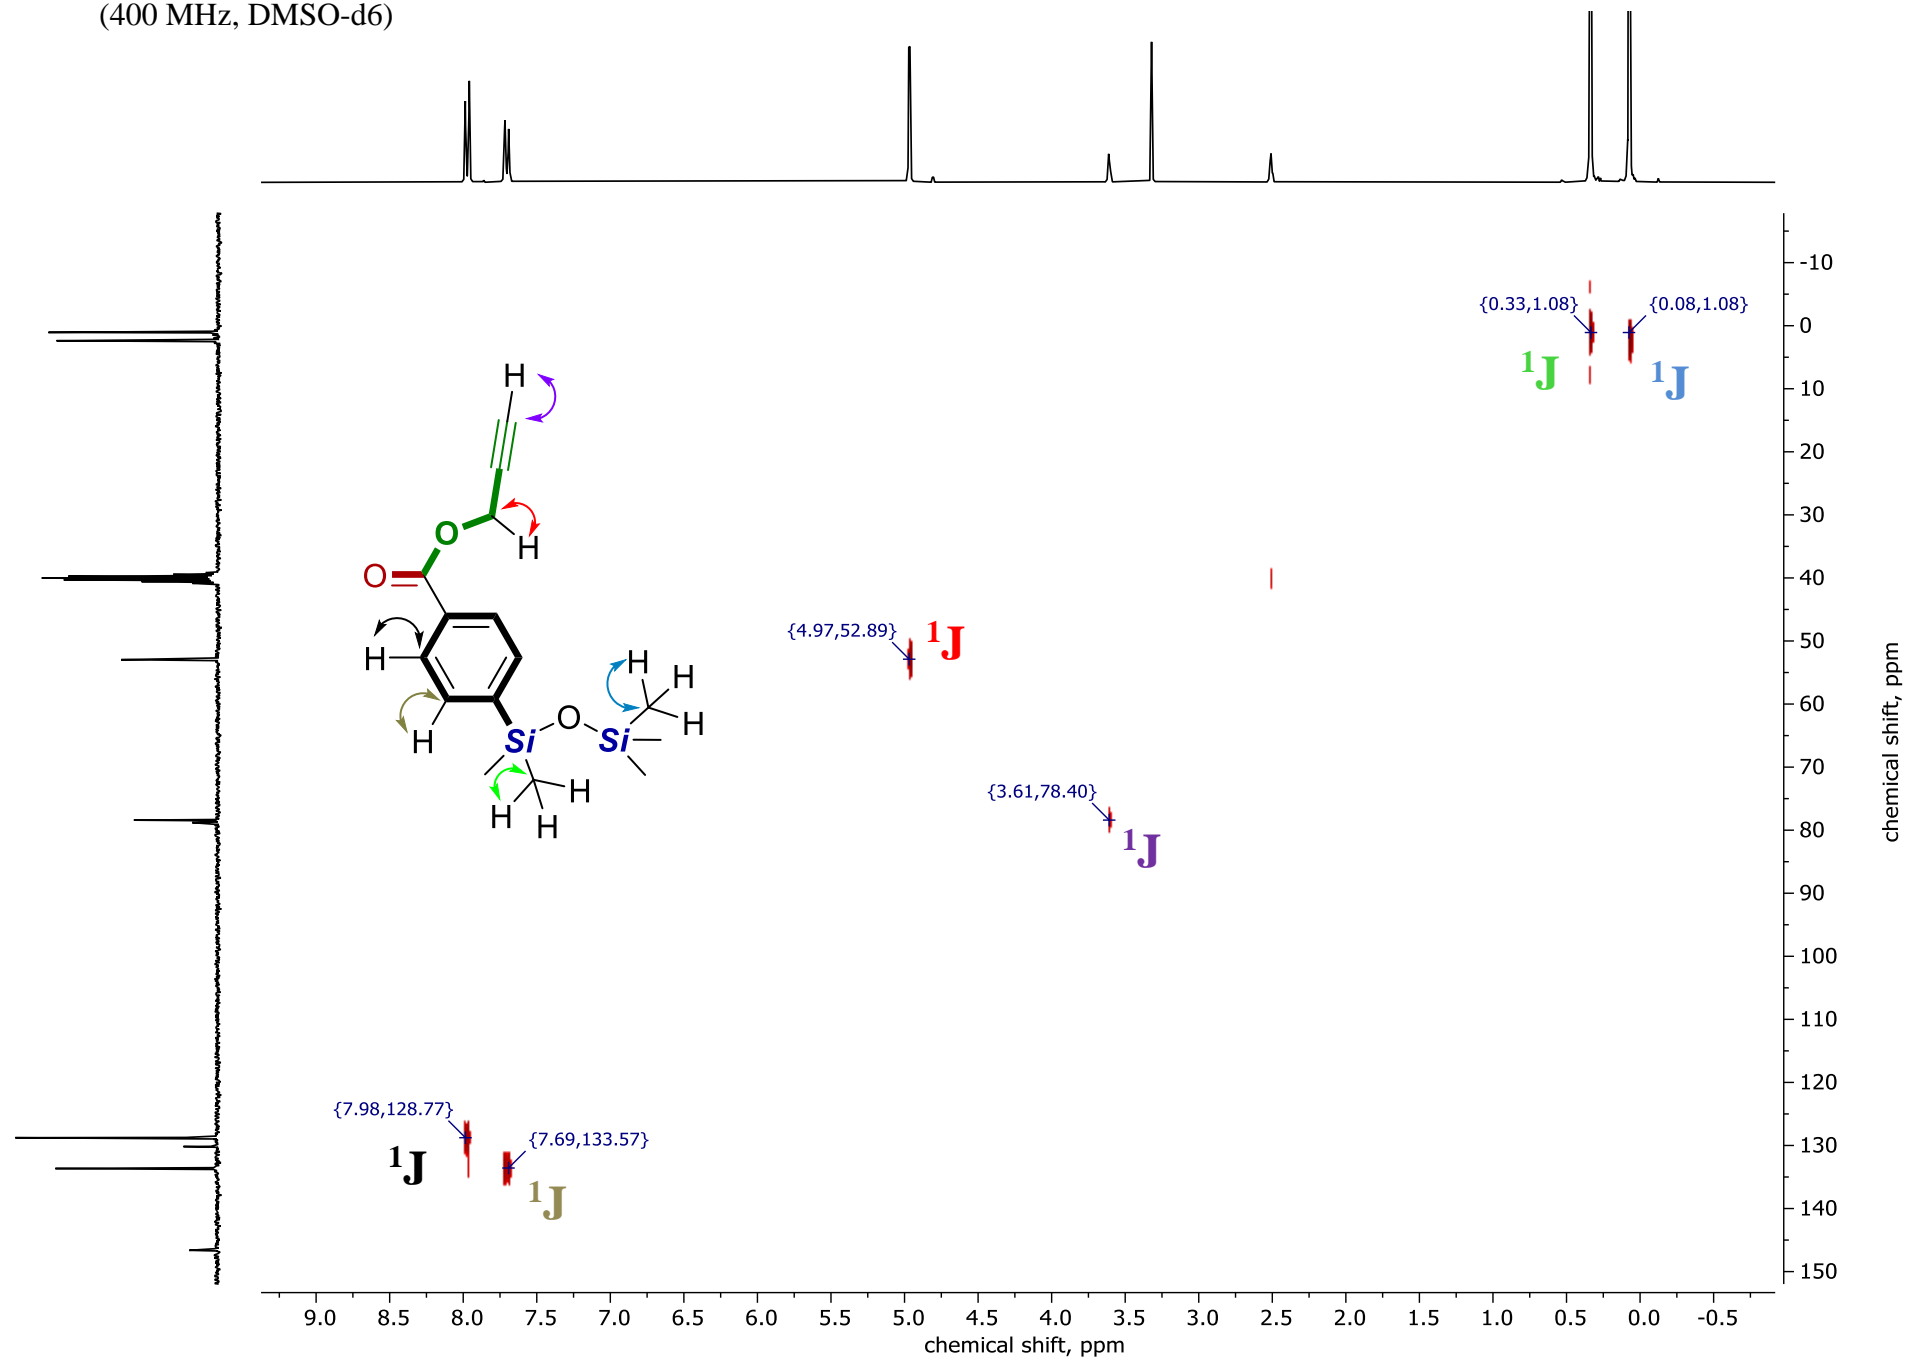

$^1\text{H} - ^{29}\text{Si}$  HMBC  
(400 MHz, DMSO-d<sub>6</sub>)

S35

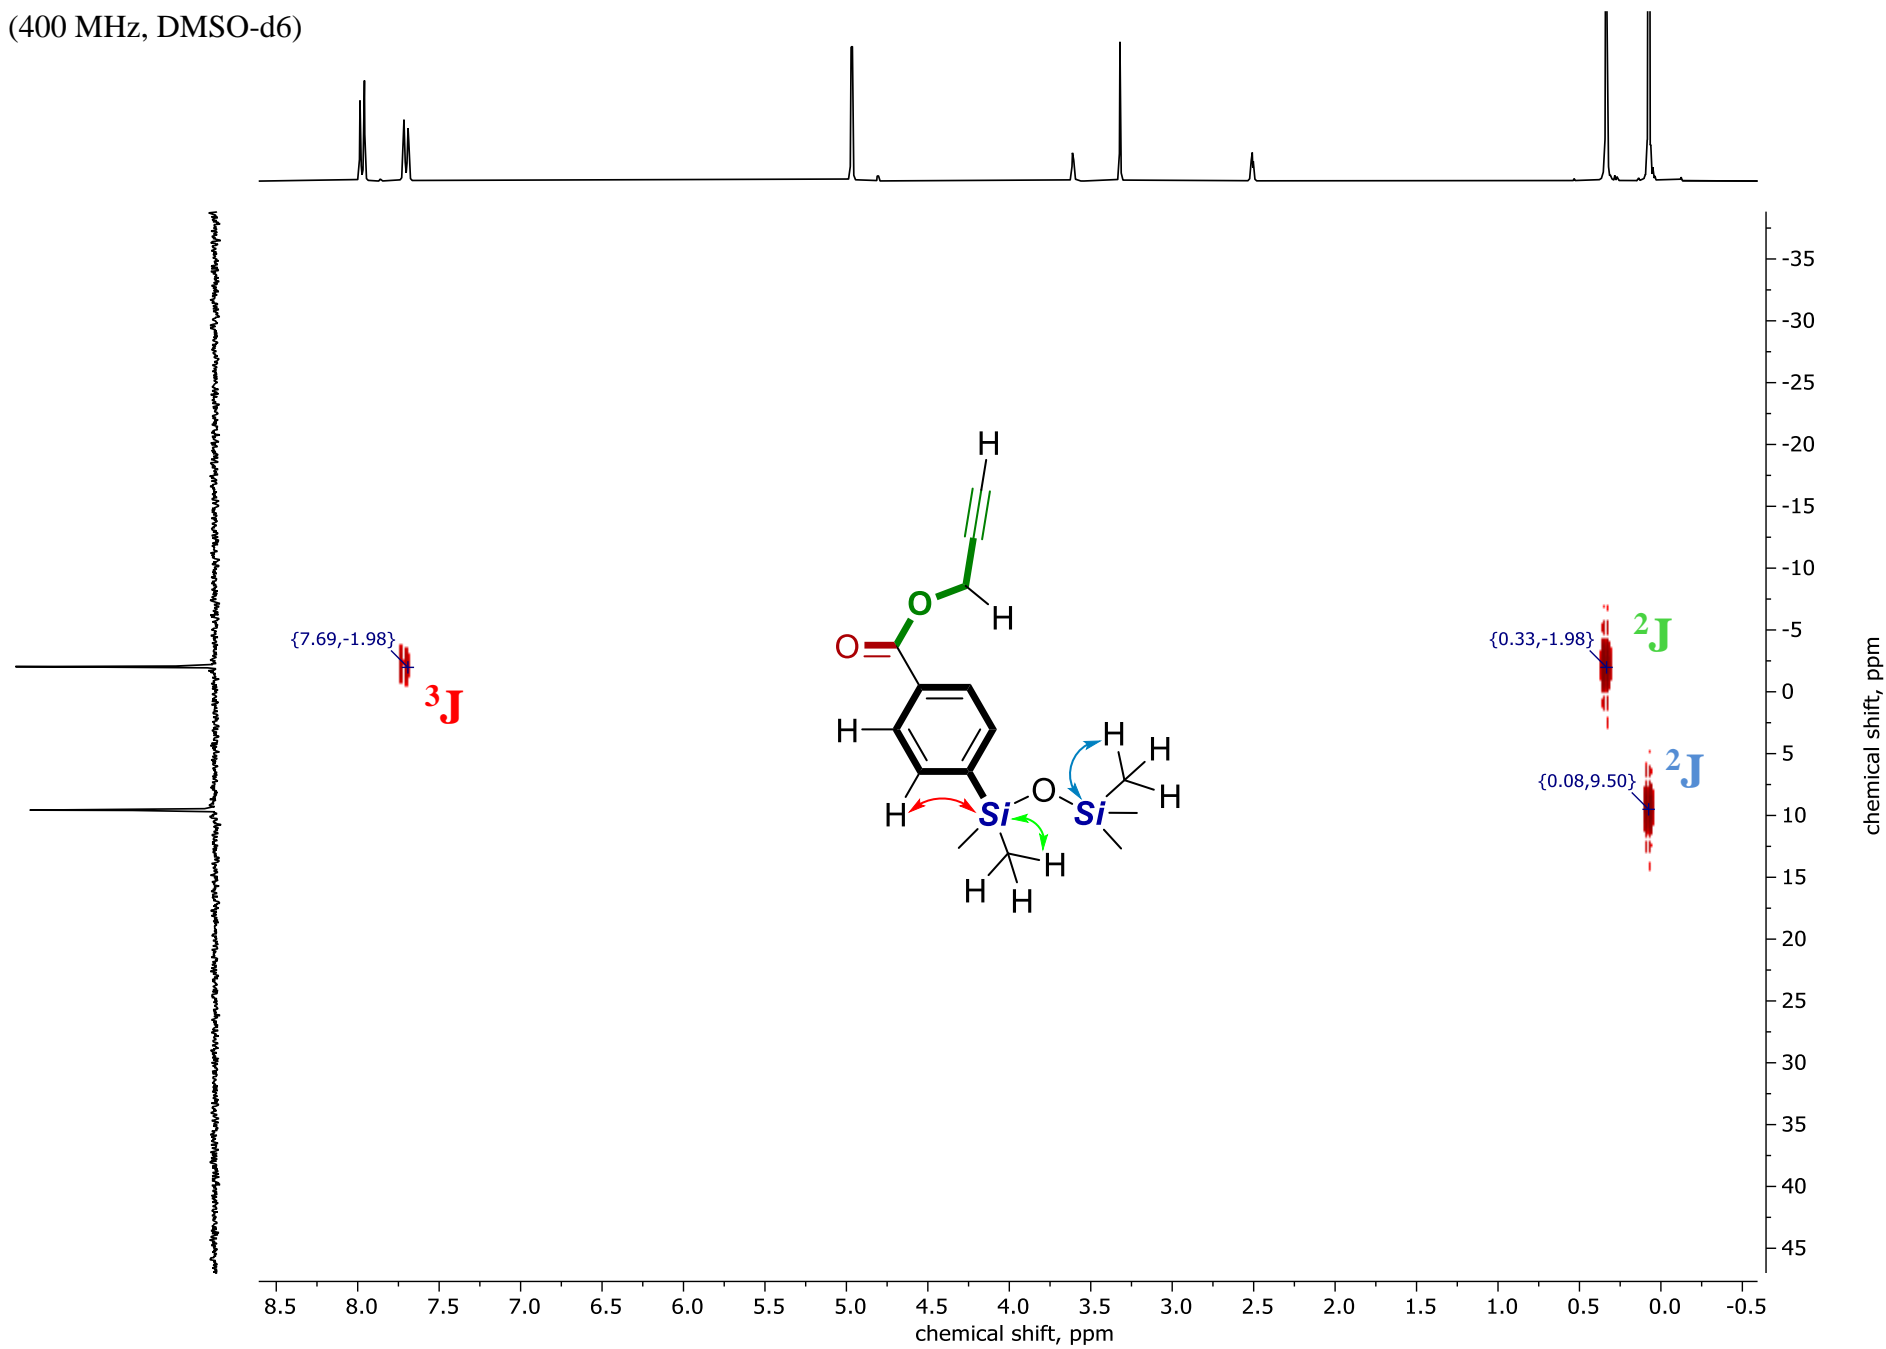

IR spectrum

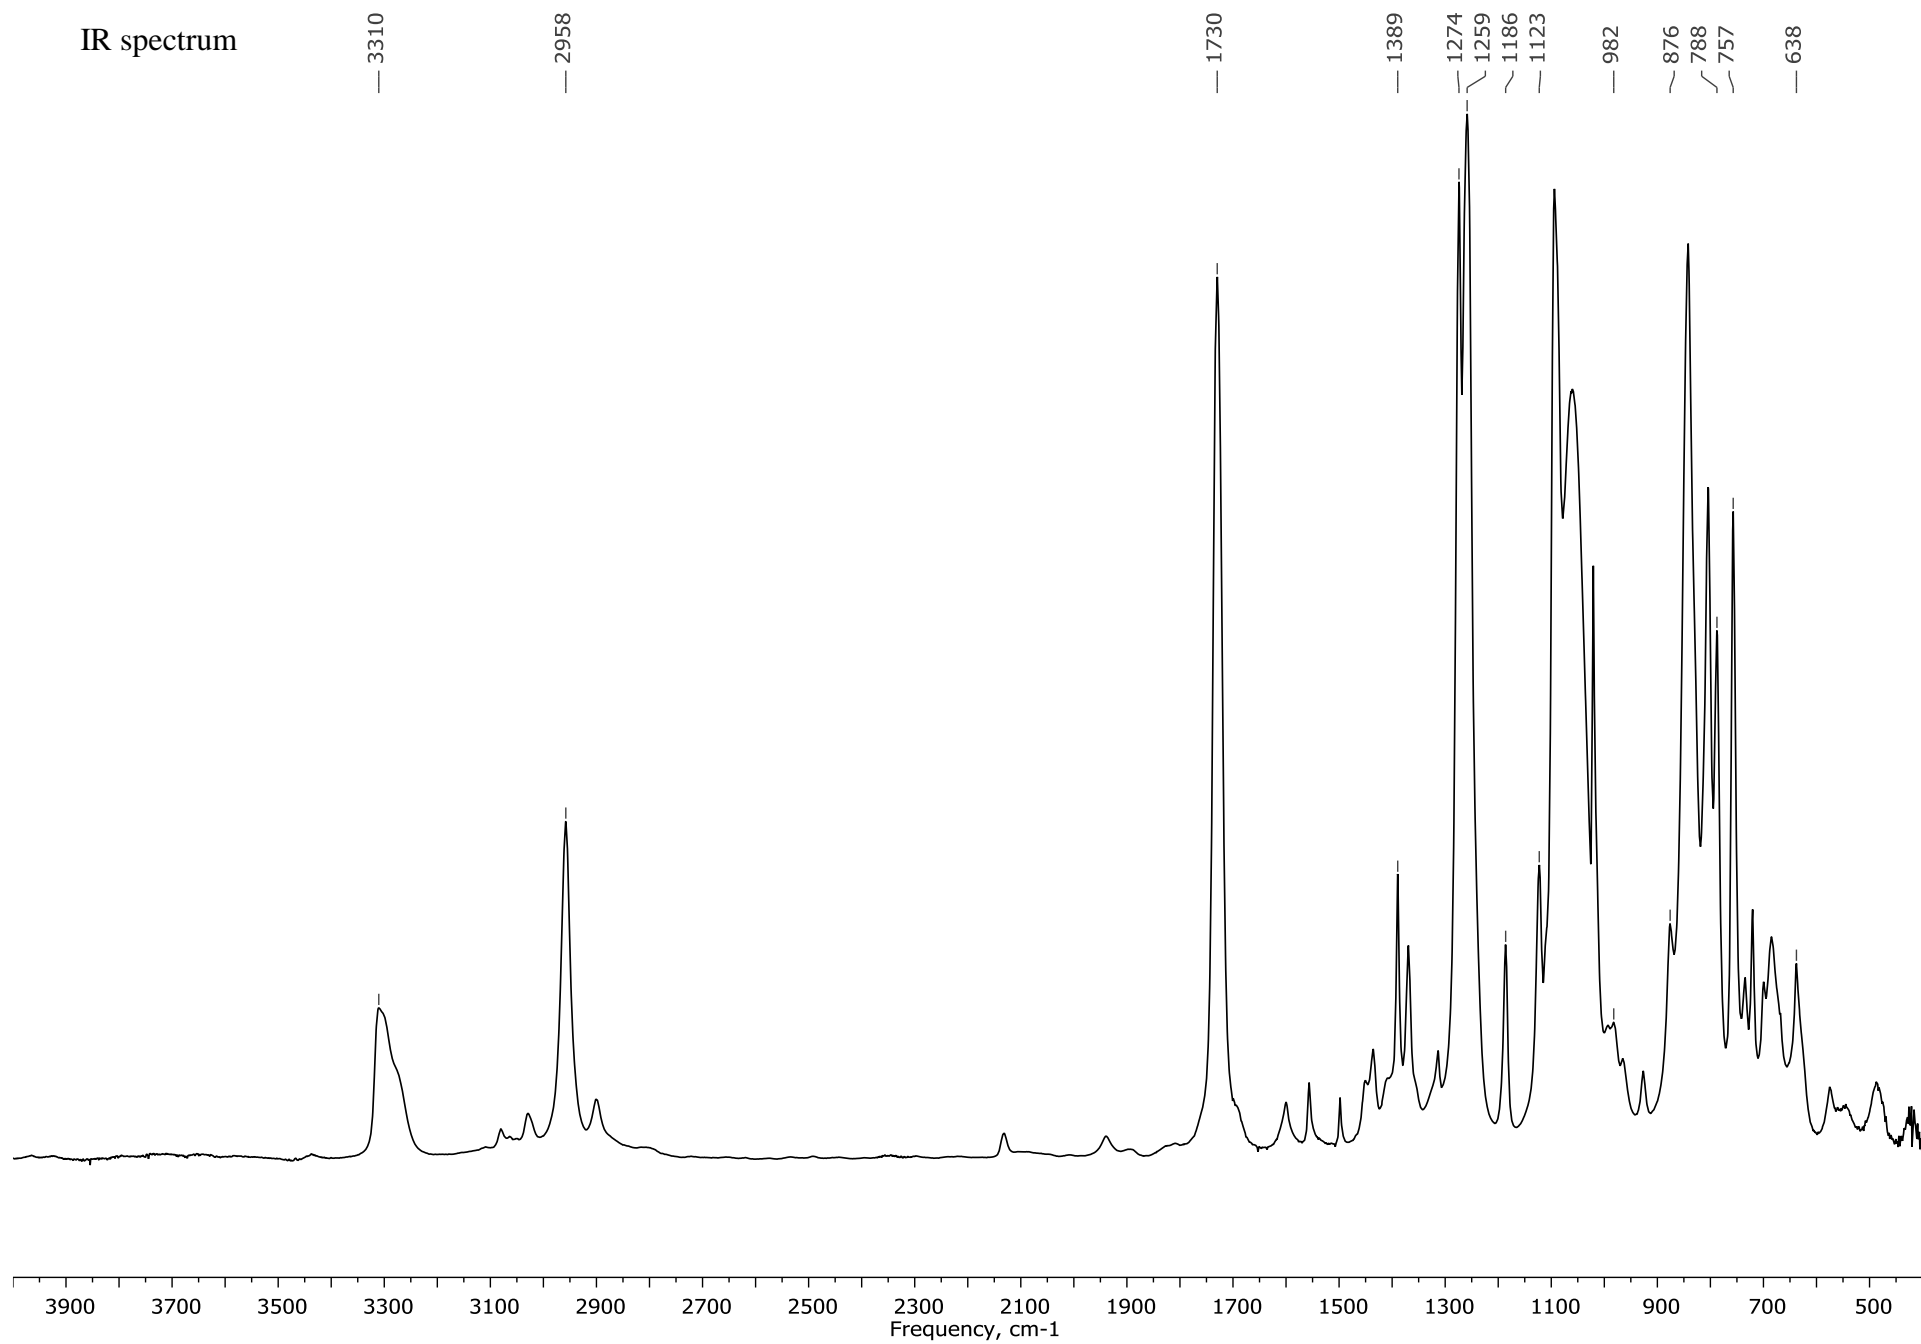

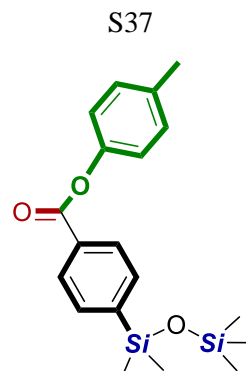

**Characterisation data for p-tolyl 4-(1,1,3,3,3-pentamethyldisiloxaneyl)benzoate:**

$^1\text{H}$  NMR (400 MHz, DMSO- $d_6$ ):  $\delta$  = 8.11 (d,  $^3J=11$  Hz, 2H),  $\delta$  = 7.74 (d,  $^3J=1$  Hz, 2H),  $\delta$  = 7.24 (d,  $^3J=11$  Hz, 2H),  $\delta$  = 7.13 (d,  $^3J=11$  Hz, 2H),  $\delta$  = 2.32 (s, 3H),  $\delta$  = 0.34 (s, 6H),  $\delta$  = 0.08 (s, 9H).  $^{13}\text{C}$  NMR (100 MHz, DMSO- $d_6$ ):  $\delta$  = 164.62, 148.37, 146.39, 135.03, 133.12, 129.80, 129.71, 128.68, 121.42, 20.34, 1.82, 0.52.  $^{29}\text{Si}$  NMR (80 MHz, DMSO- $d_6$ ):  $\delta$  = 9.54, -2.09. HRMS (ESI)  $m/z$   $[\text{M} + \text{H}]^+$ : calcd for  $[\text{C}_{19}\text{H}_{26}\text{O}_3\text{Si}_2 + \text{H}]^+$ , 359.1493; found, 259.1508.  $[\text{M} + \text{NH}_4]^+$ : calcd for  $[\text{C}_{19}\text{H}_{26}\text{O}_3\text{Si}_2 + \text{NH}_4]^+$ , 376.1759; found, 376.1777.  $[\text{M} + \text{Na}]^+$ : calcd for  $[\text{C}_{19}\text{H}_{26}\text{O}_3\text{Si}_2 + \text{Na}]^+$ , 381.1313; found, 381.1320.  $[\text{M} + \text{K}]^+$ : calcd for  $[\text{C}_{19}\text{H}_{26}\text{O}_3\text{Si}_2 + \text{K}]^+$ , 397.1052; found, 397.1063. IR ( $\text{cm}^{-1}$ ): 2956, 1738, 1509, 1389, 1258, 1199, 1166, 1117, -1018, 875-753.

<sup>1</sup>H NMR

(400 MHz, DMSO-d6)

S38

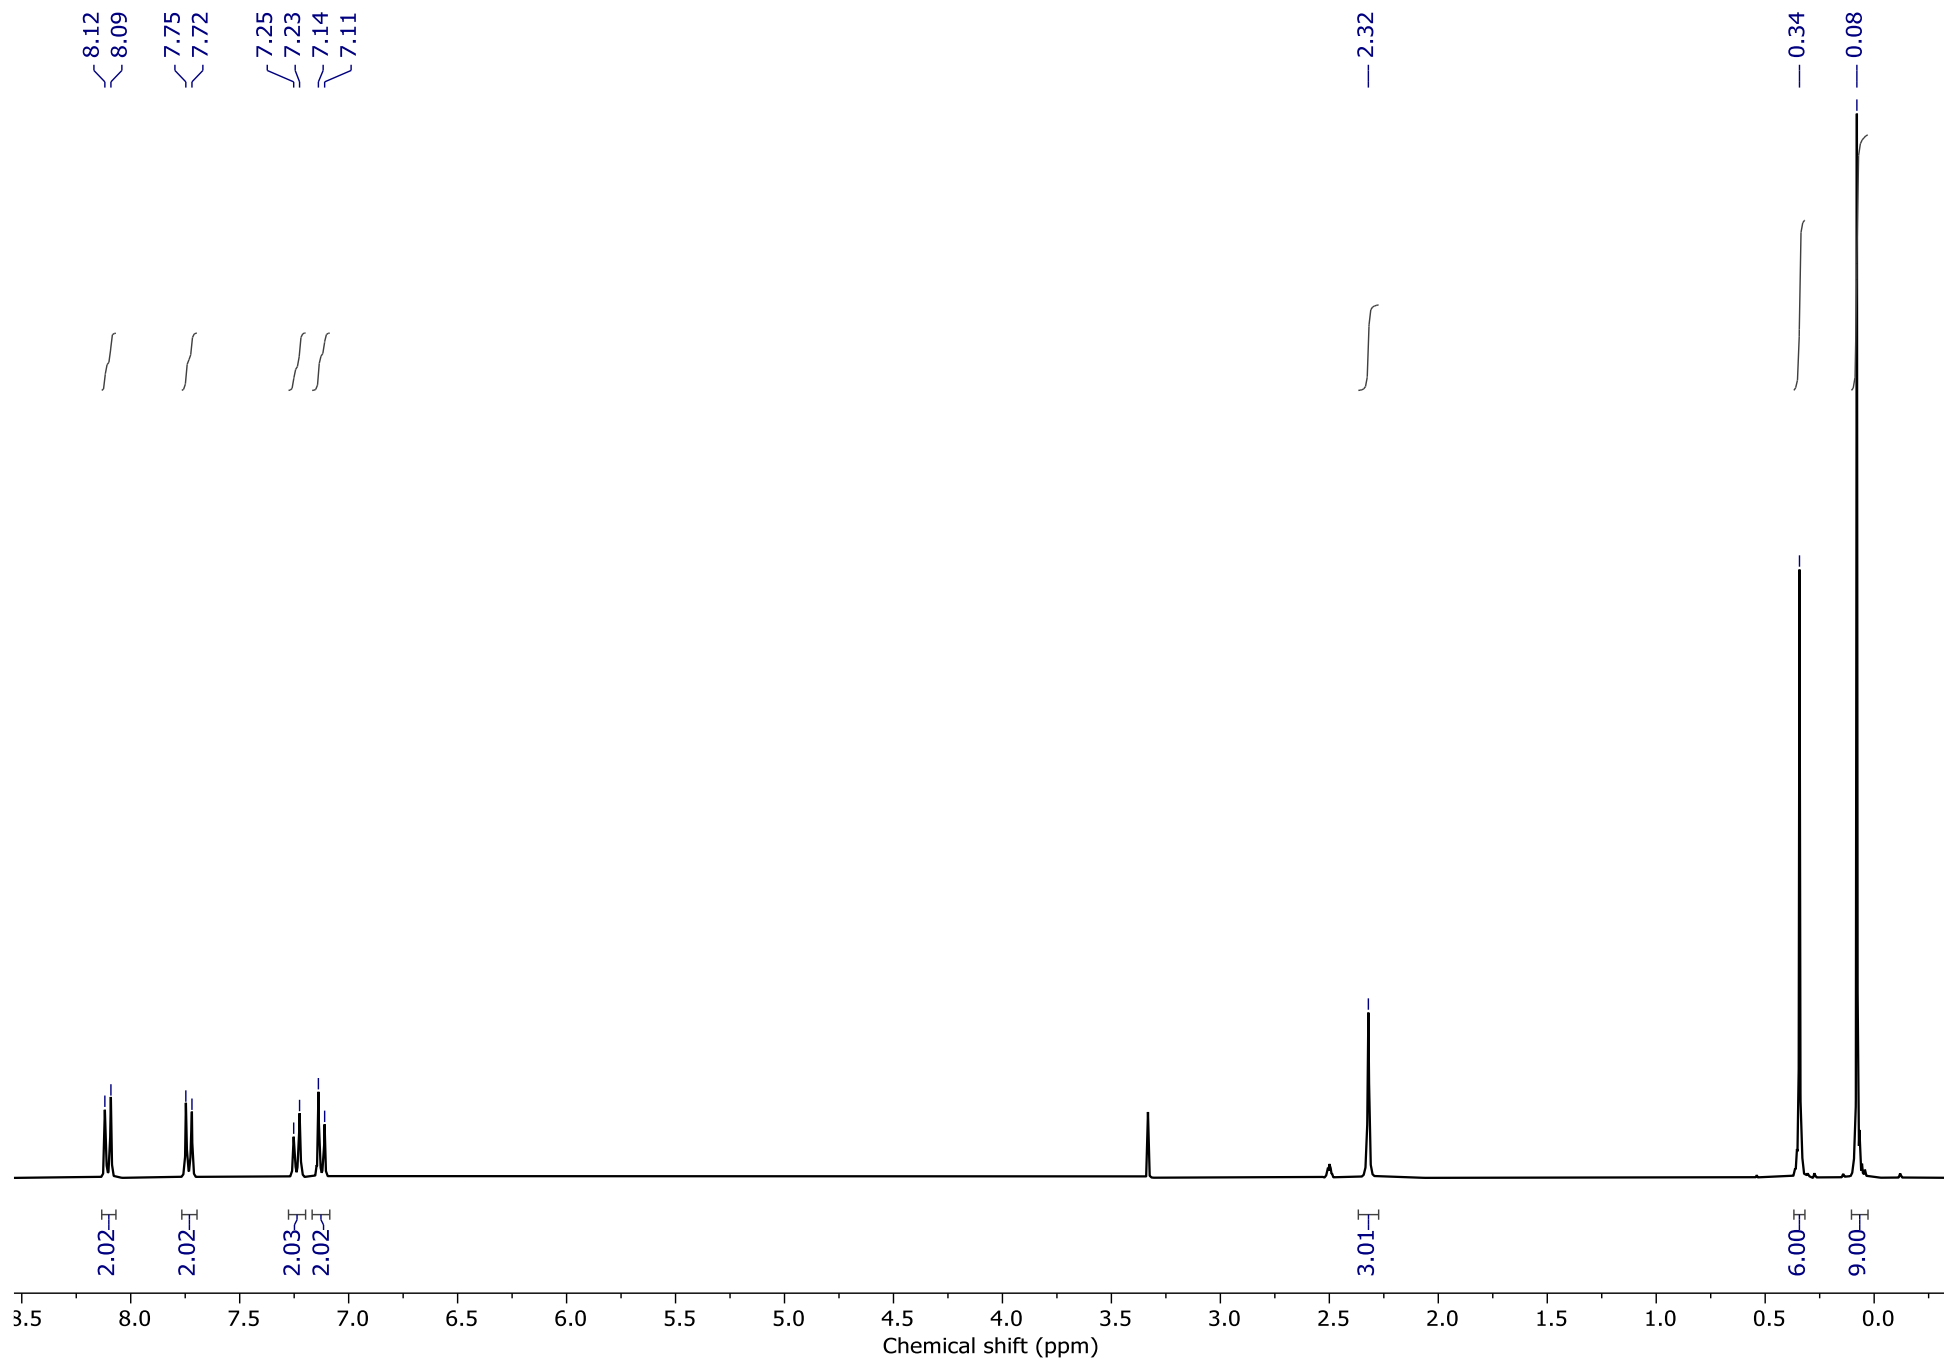

<sup>13</sup>C NMR

(100 MHz, DMSO-d6)

S39

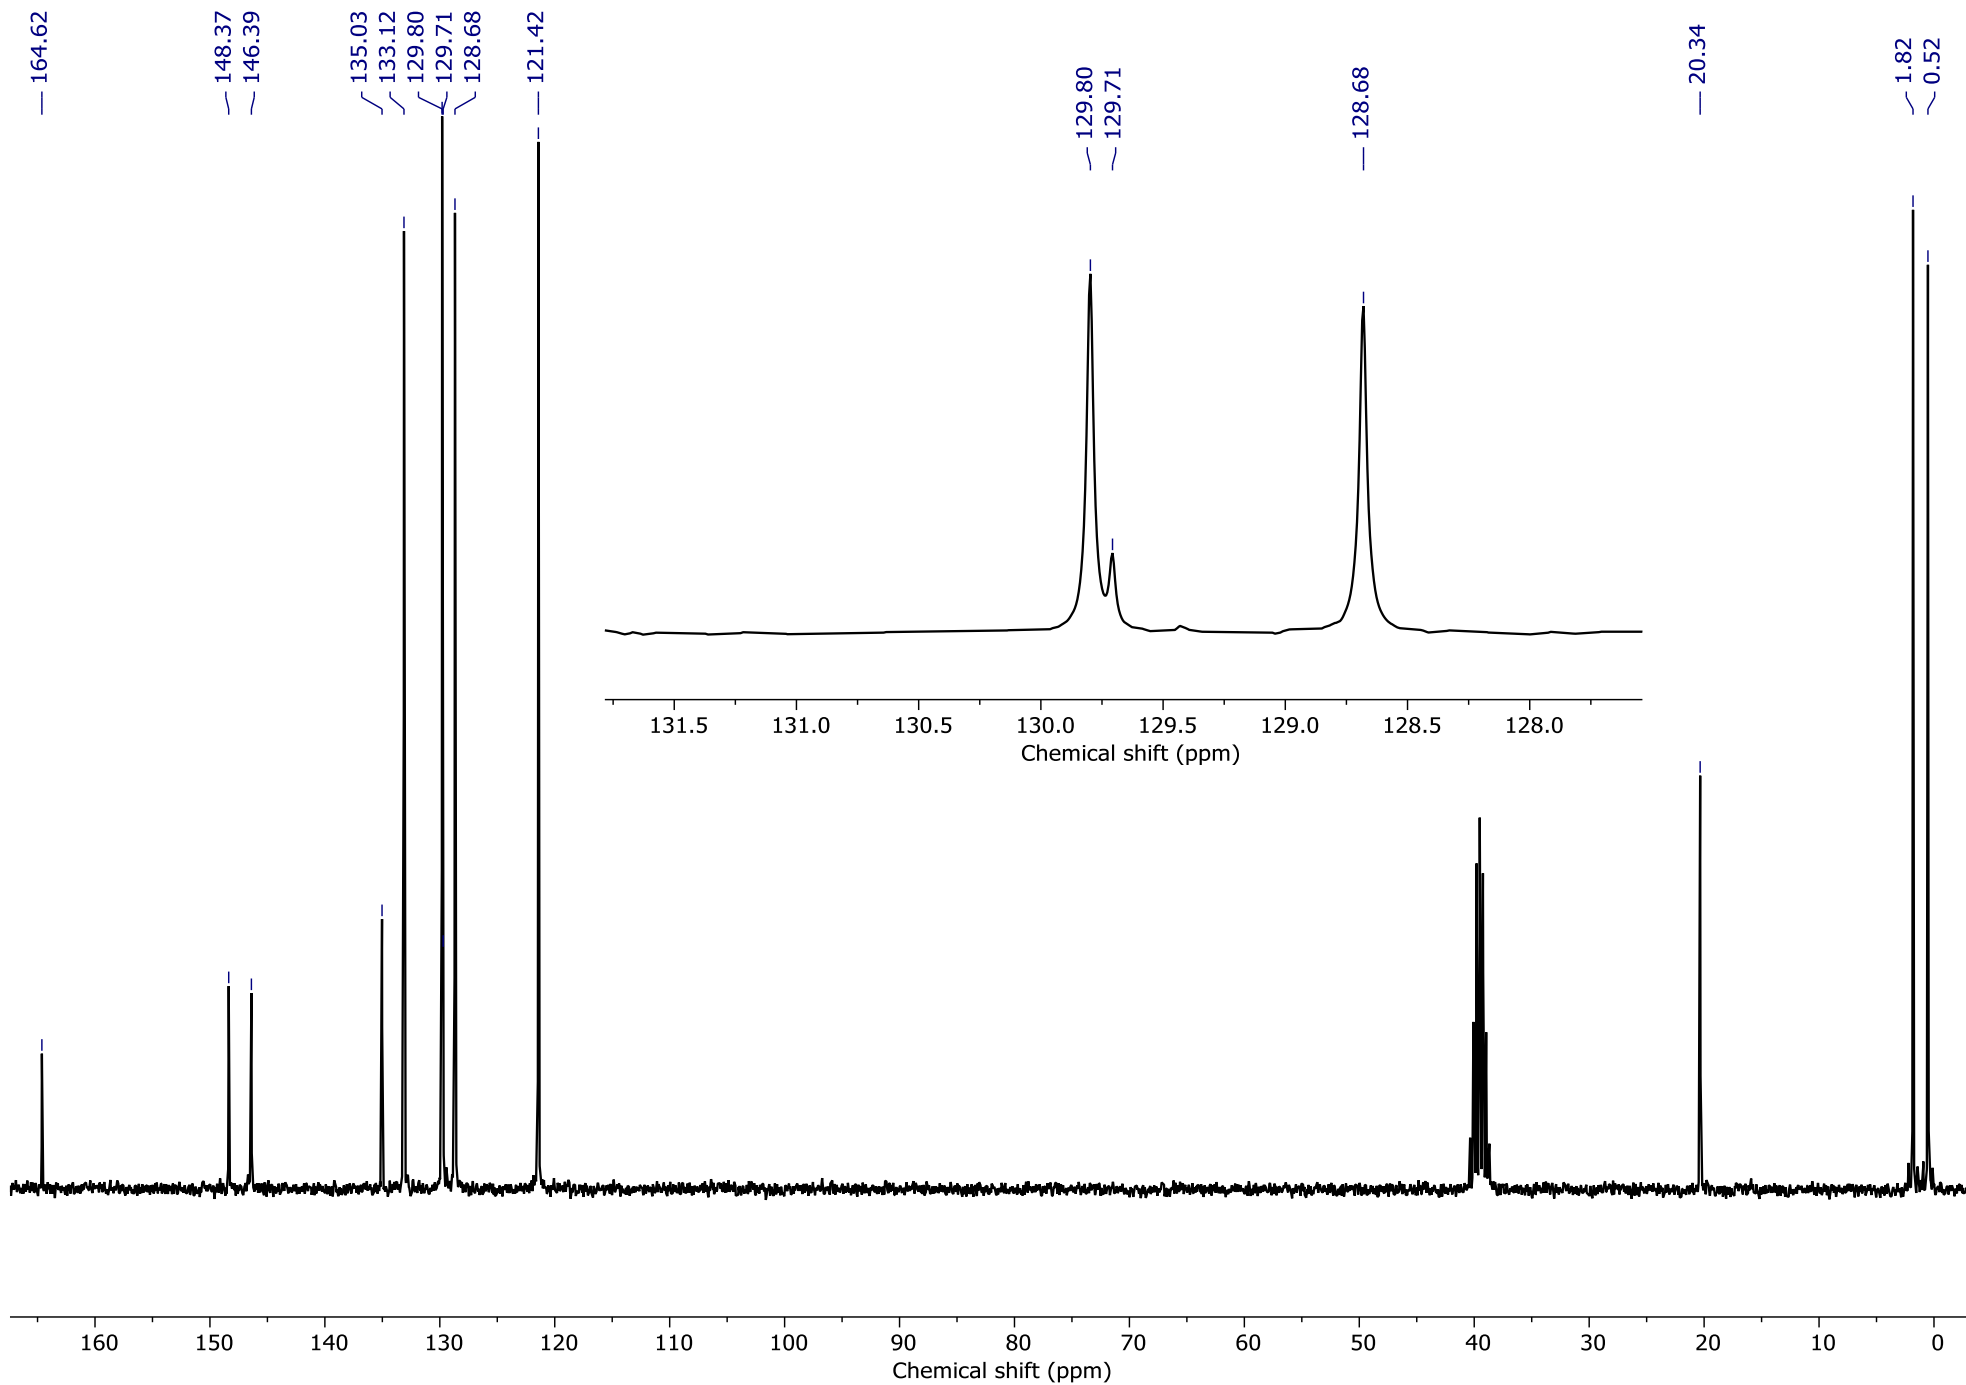

$^{29}\text{Si}$  NMR  
(80 MHz, DMSO-d6)

S40

9.54  
-2.09

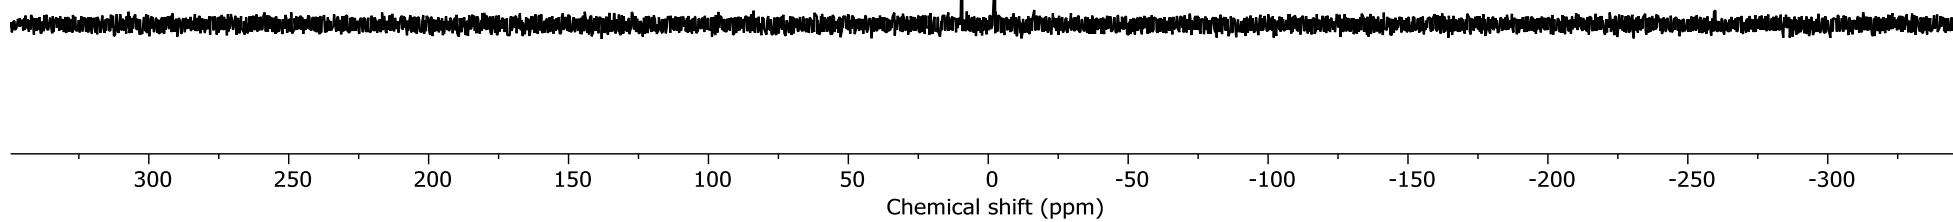



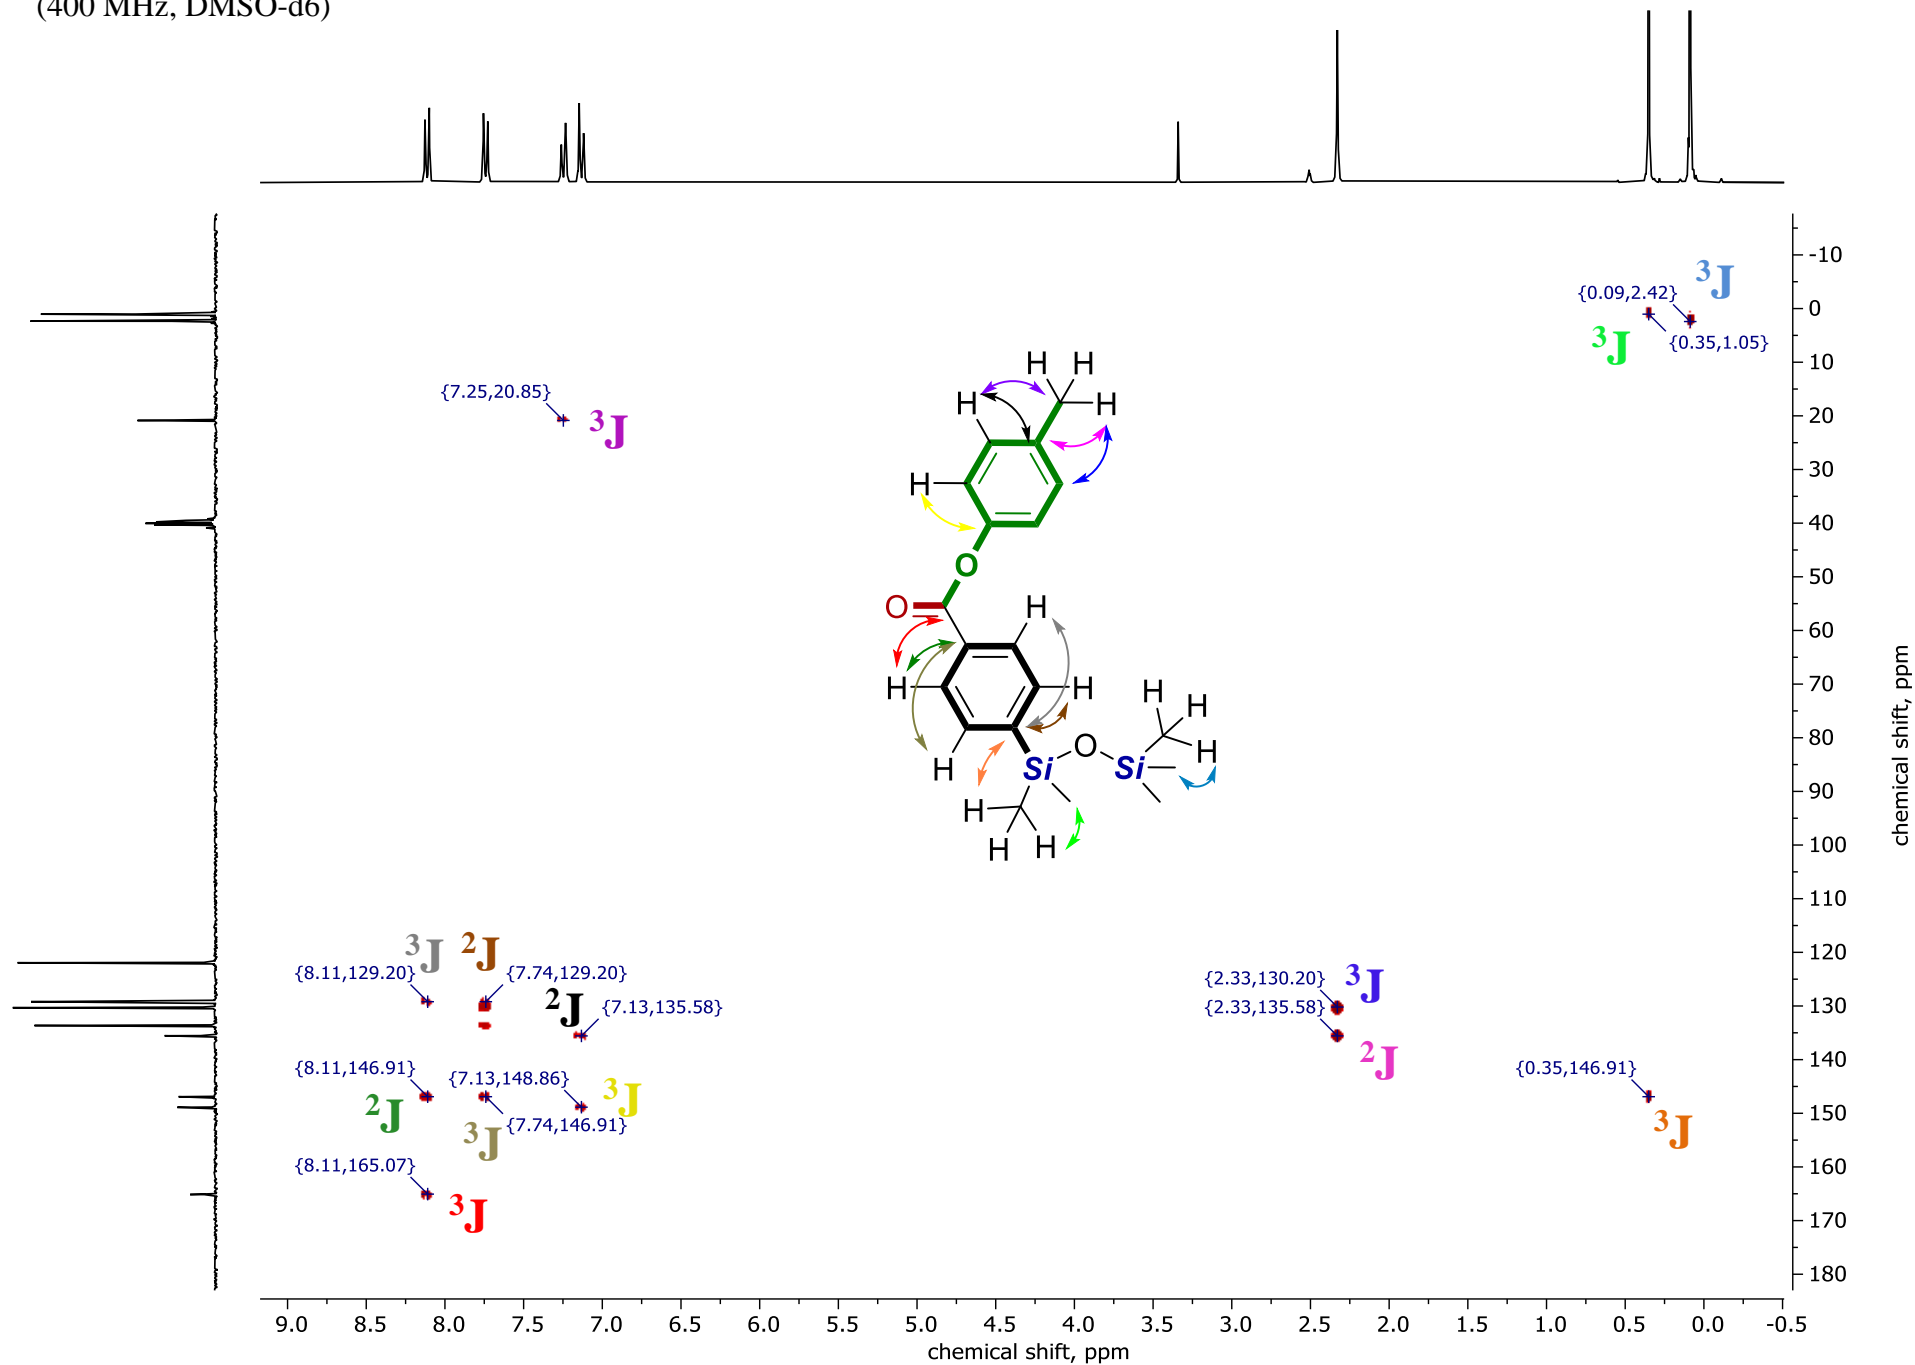

$^1\text{H} - ^{13}\text{C}$  HSQC  
(400 MHz, DMSO-d<sub>6</sub>)

S42

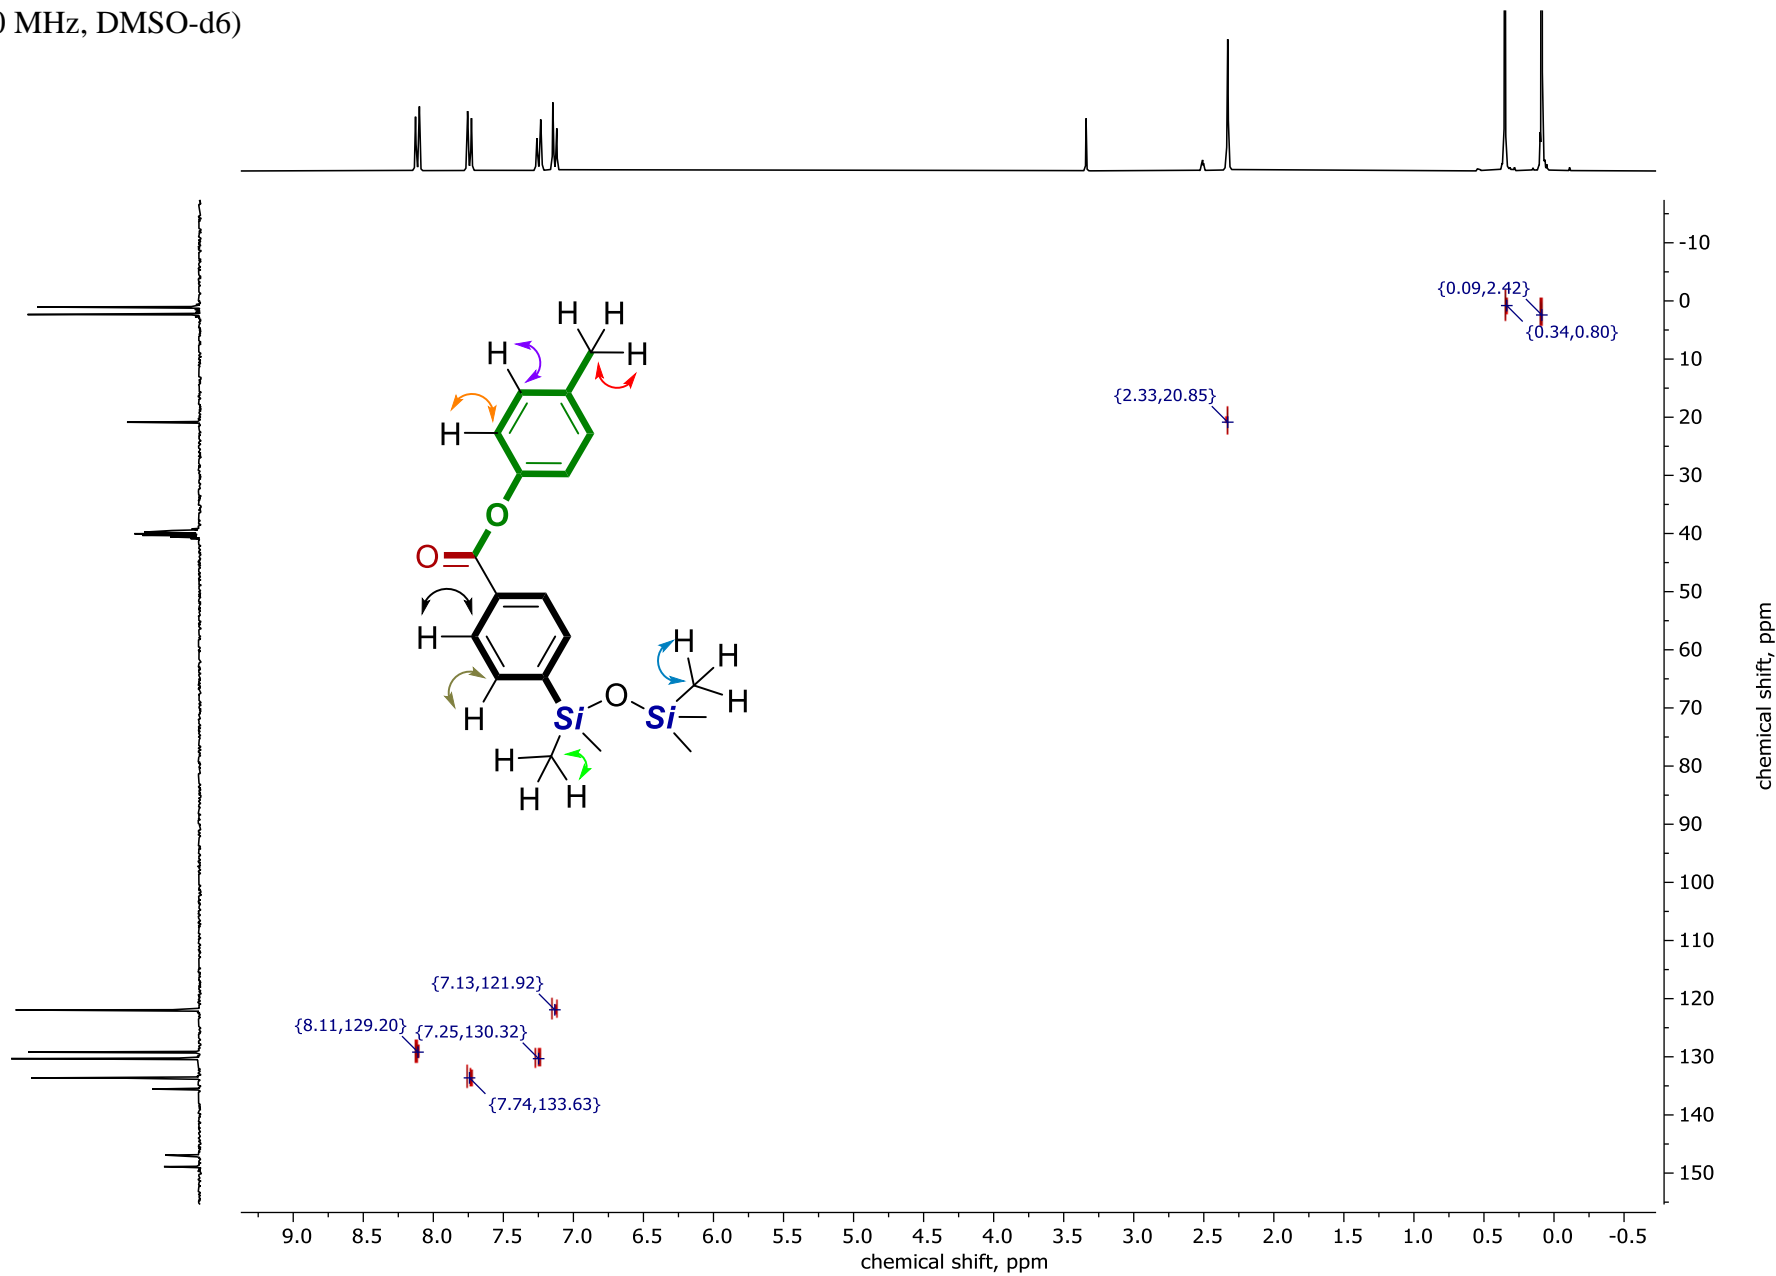

S43

$^1\text{H} - ^{29}\text{Si}$  HMBC  
(400 MHz, DMSO-d6)

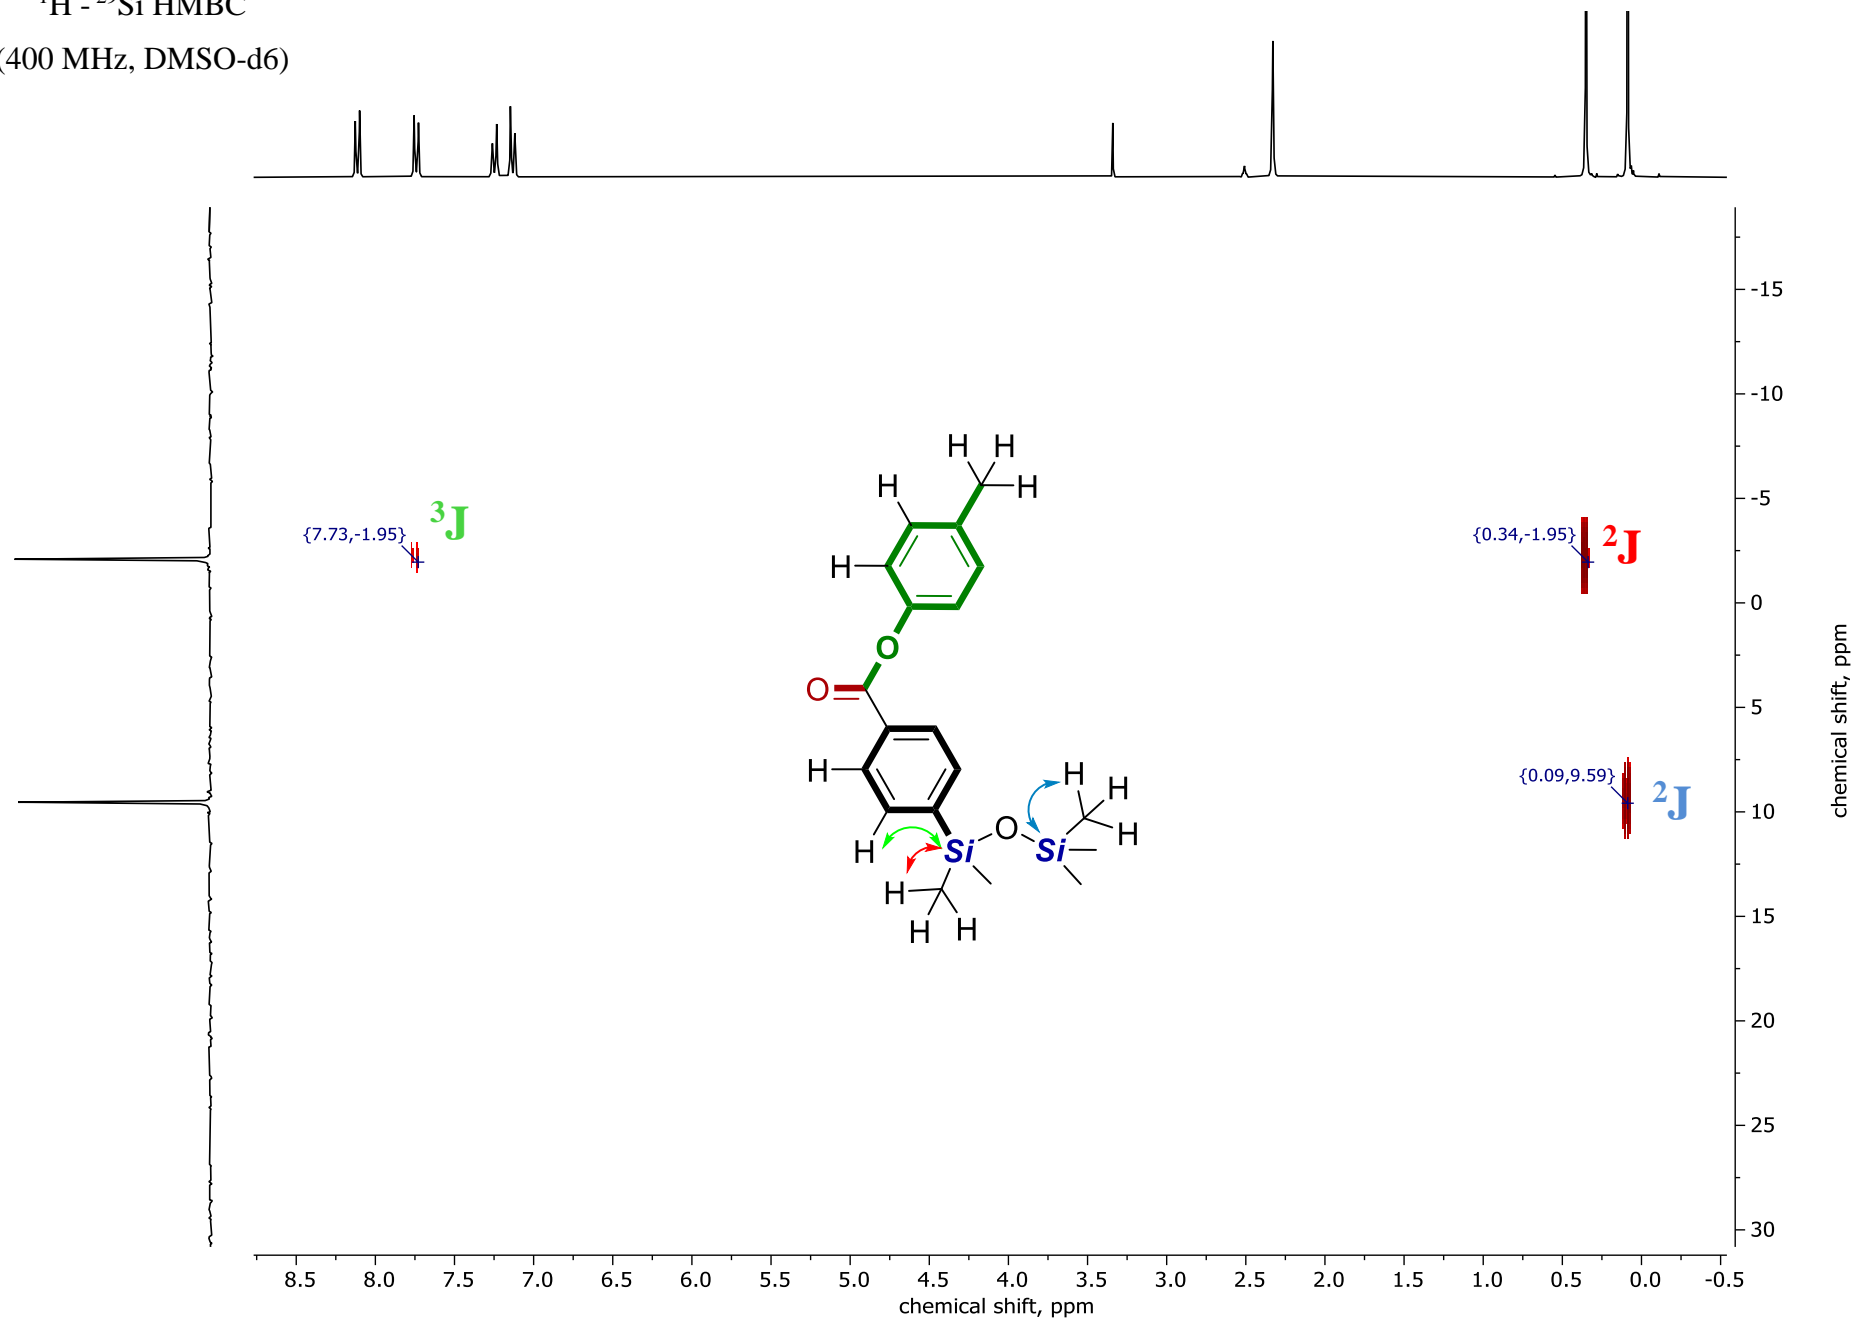

S44

IR spectrum

— 2956

— 1738

— 1509

— 1389

~ 1258

~ 1199

~ 1166

~ 1117

~ 1018

— 875

— 753

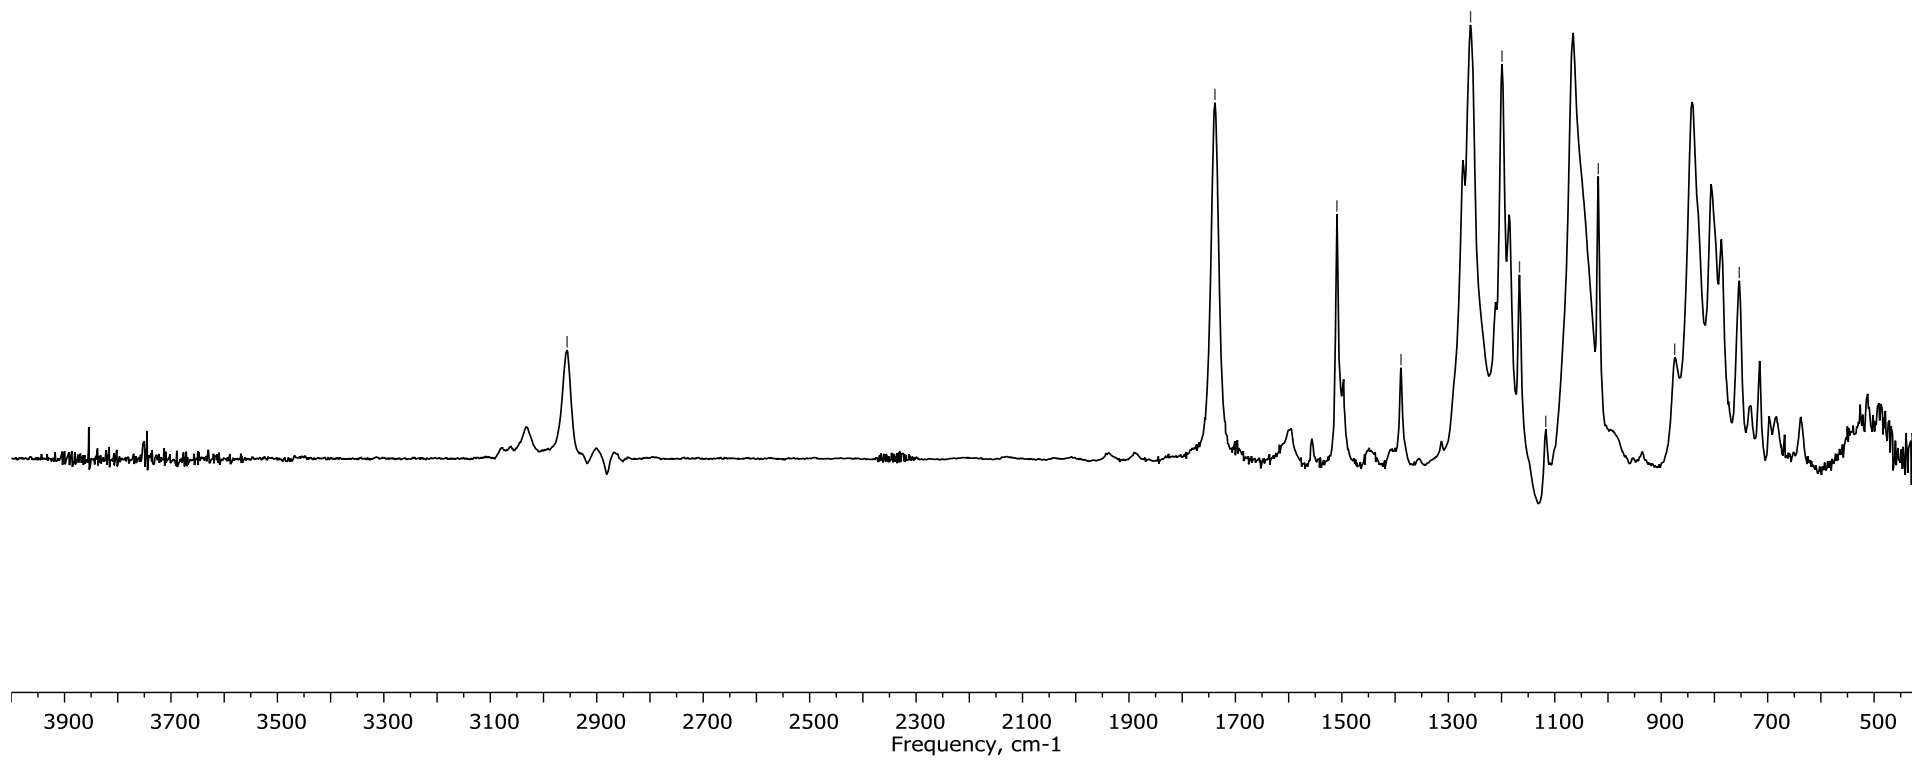

## HRMS (ESI)

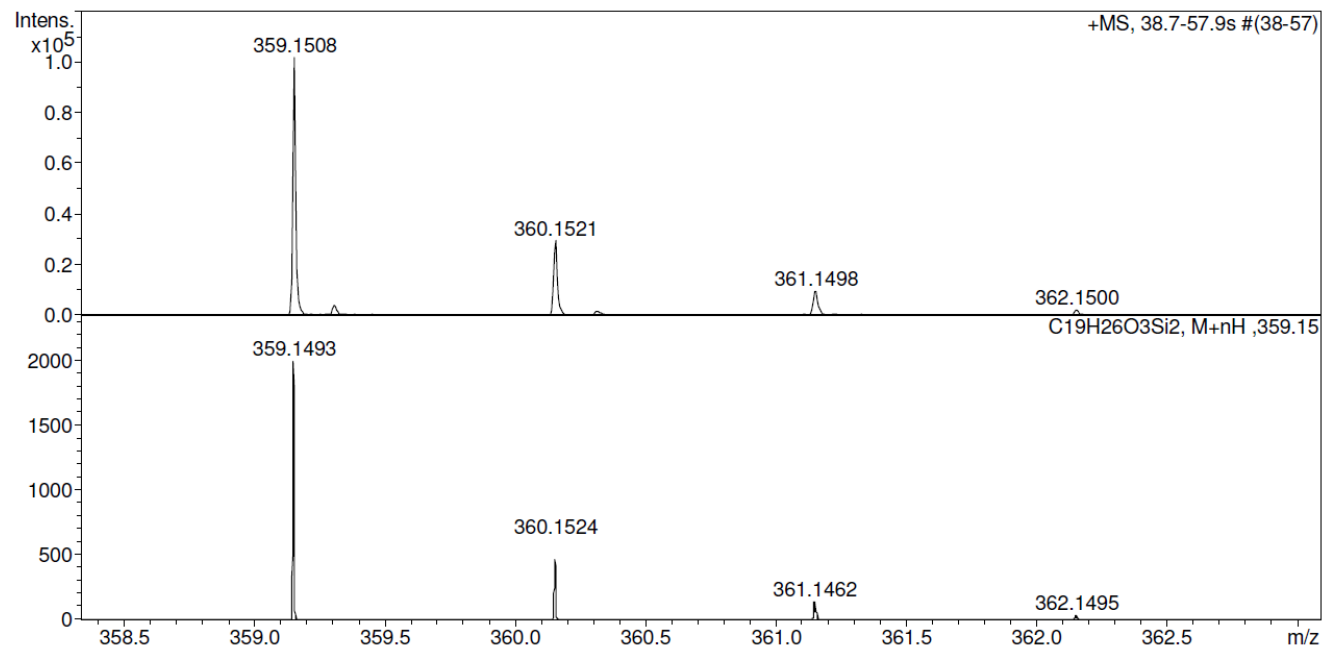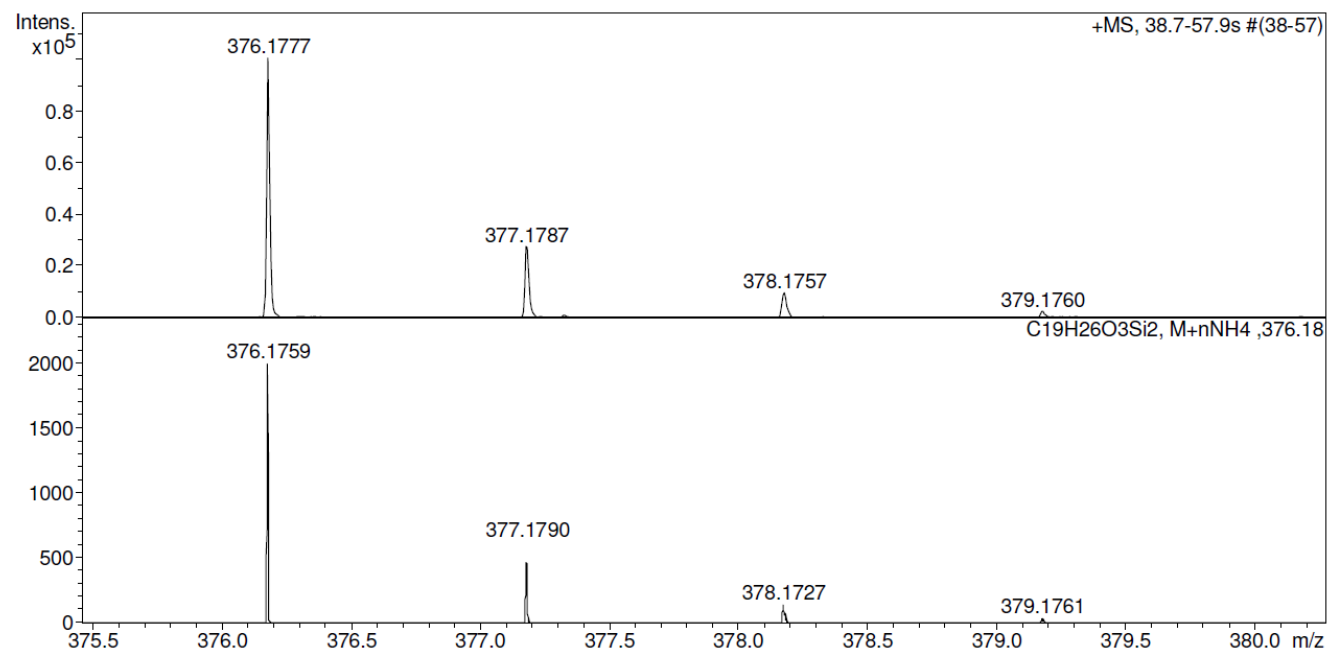

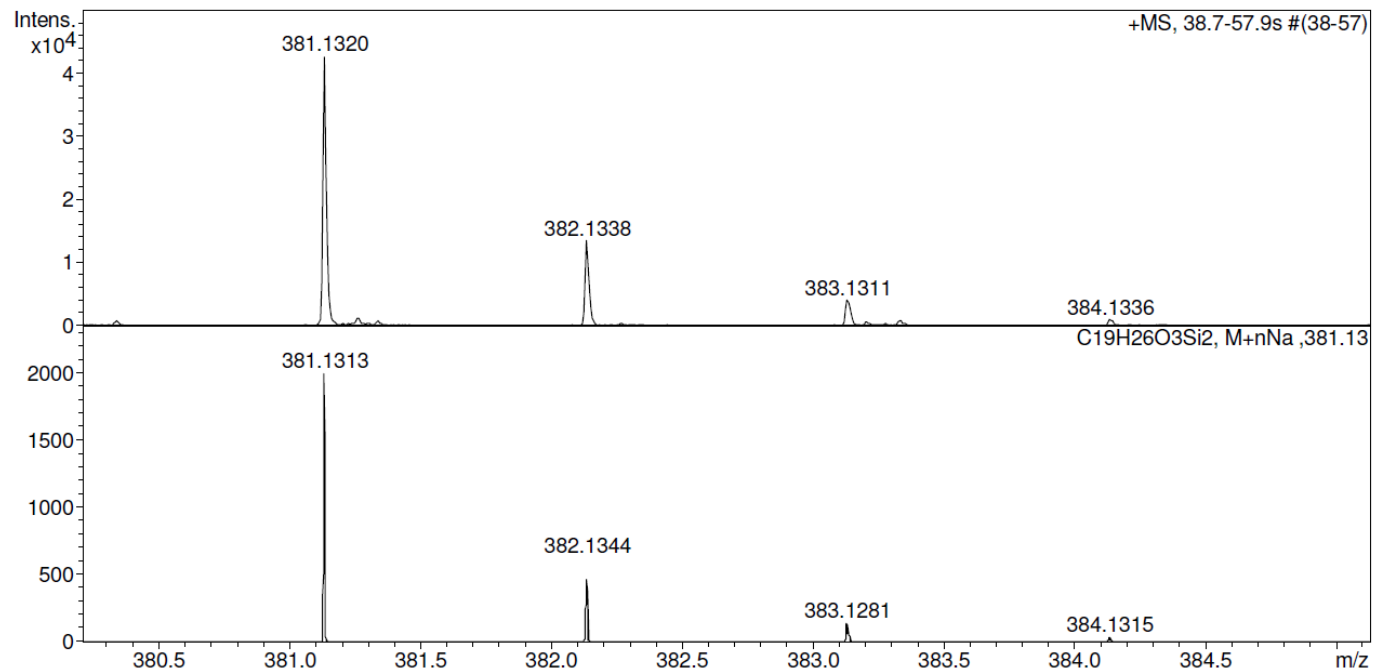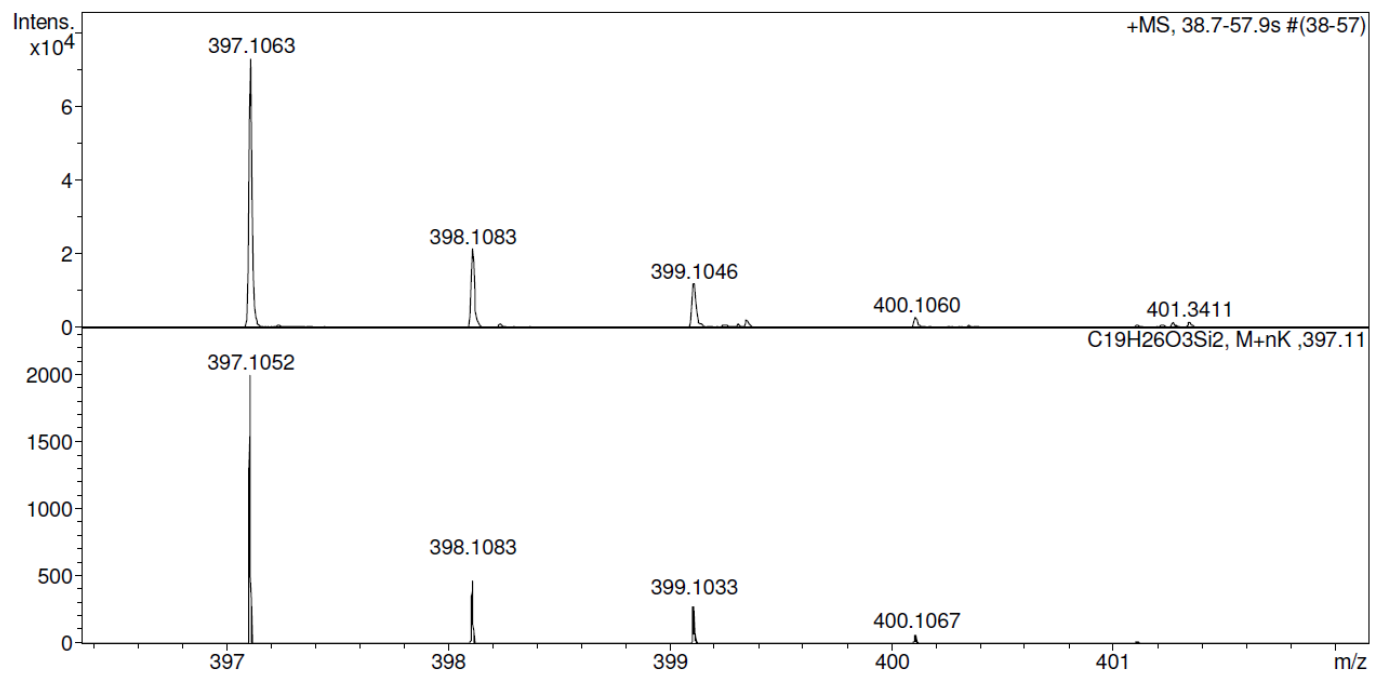

S47

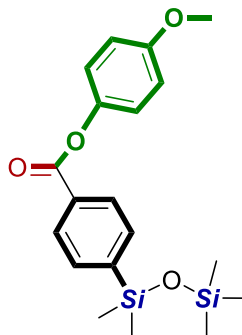

**Characterisation data for 4-methoxyphenyl 4-(1,1,3,3,3-pentamethyldisiloxanyl)benzoate:**

$^1\text{H}$  NMR (400 MHz, acetone- $d_6$ ):  $\delta$  = 8.16 (d,  $^3J=11$  Hz, 2H),  $\delta$  = 7.80 (d,  $^3J=11$  Hz, 2H),  $\delta$  = 7.23-7.17 (m, 2H),  $\delta$  = 7.02-6.97 (m, 2H),  $\delta$  = 3.82 (s, 3H),  $\delta$  = 0.40 (s, 6H),  $\delta$  = 0.13 (s, 9H).  $^{13}\text{C}$  NMR (100 MHz, acetone- $d_6$ ):  $\delta$  = 165.87, 158.40, 147.64, 145.50, 134.11, 131.30, 129.70, 123.44, 115.21, 55.89, 2.04, 0.89.  $^{29}\text{Si}$  NMR (80 MHz, acetone- $d_6$ ):  $\delta$  = 9.38, -2.38. HRMS (ESI)  $m/z$   $[\text{M} + \text{NH}_4]^+$ : calcd for  $[\text{C}_{19}\text{H}_{26}\text{O}_4\text{Si}_2 + \text{NH}_4]^+$ , 392.1078; found, 392.1727. IR ( $\text{cm}^{-1}$ ): 2956, 2837, 1734, 1609, 1507, 1389, 1255, 1196, 1066, 871-638.

<sup>1</sup>H NMR

(400 MHz, acetone-d6)

S48

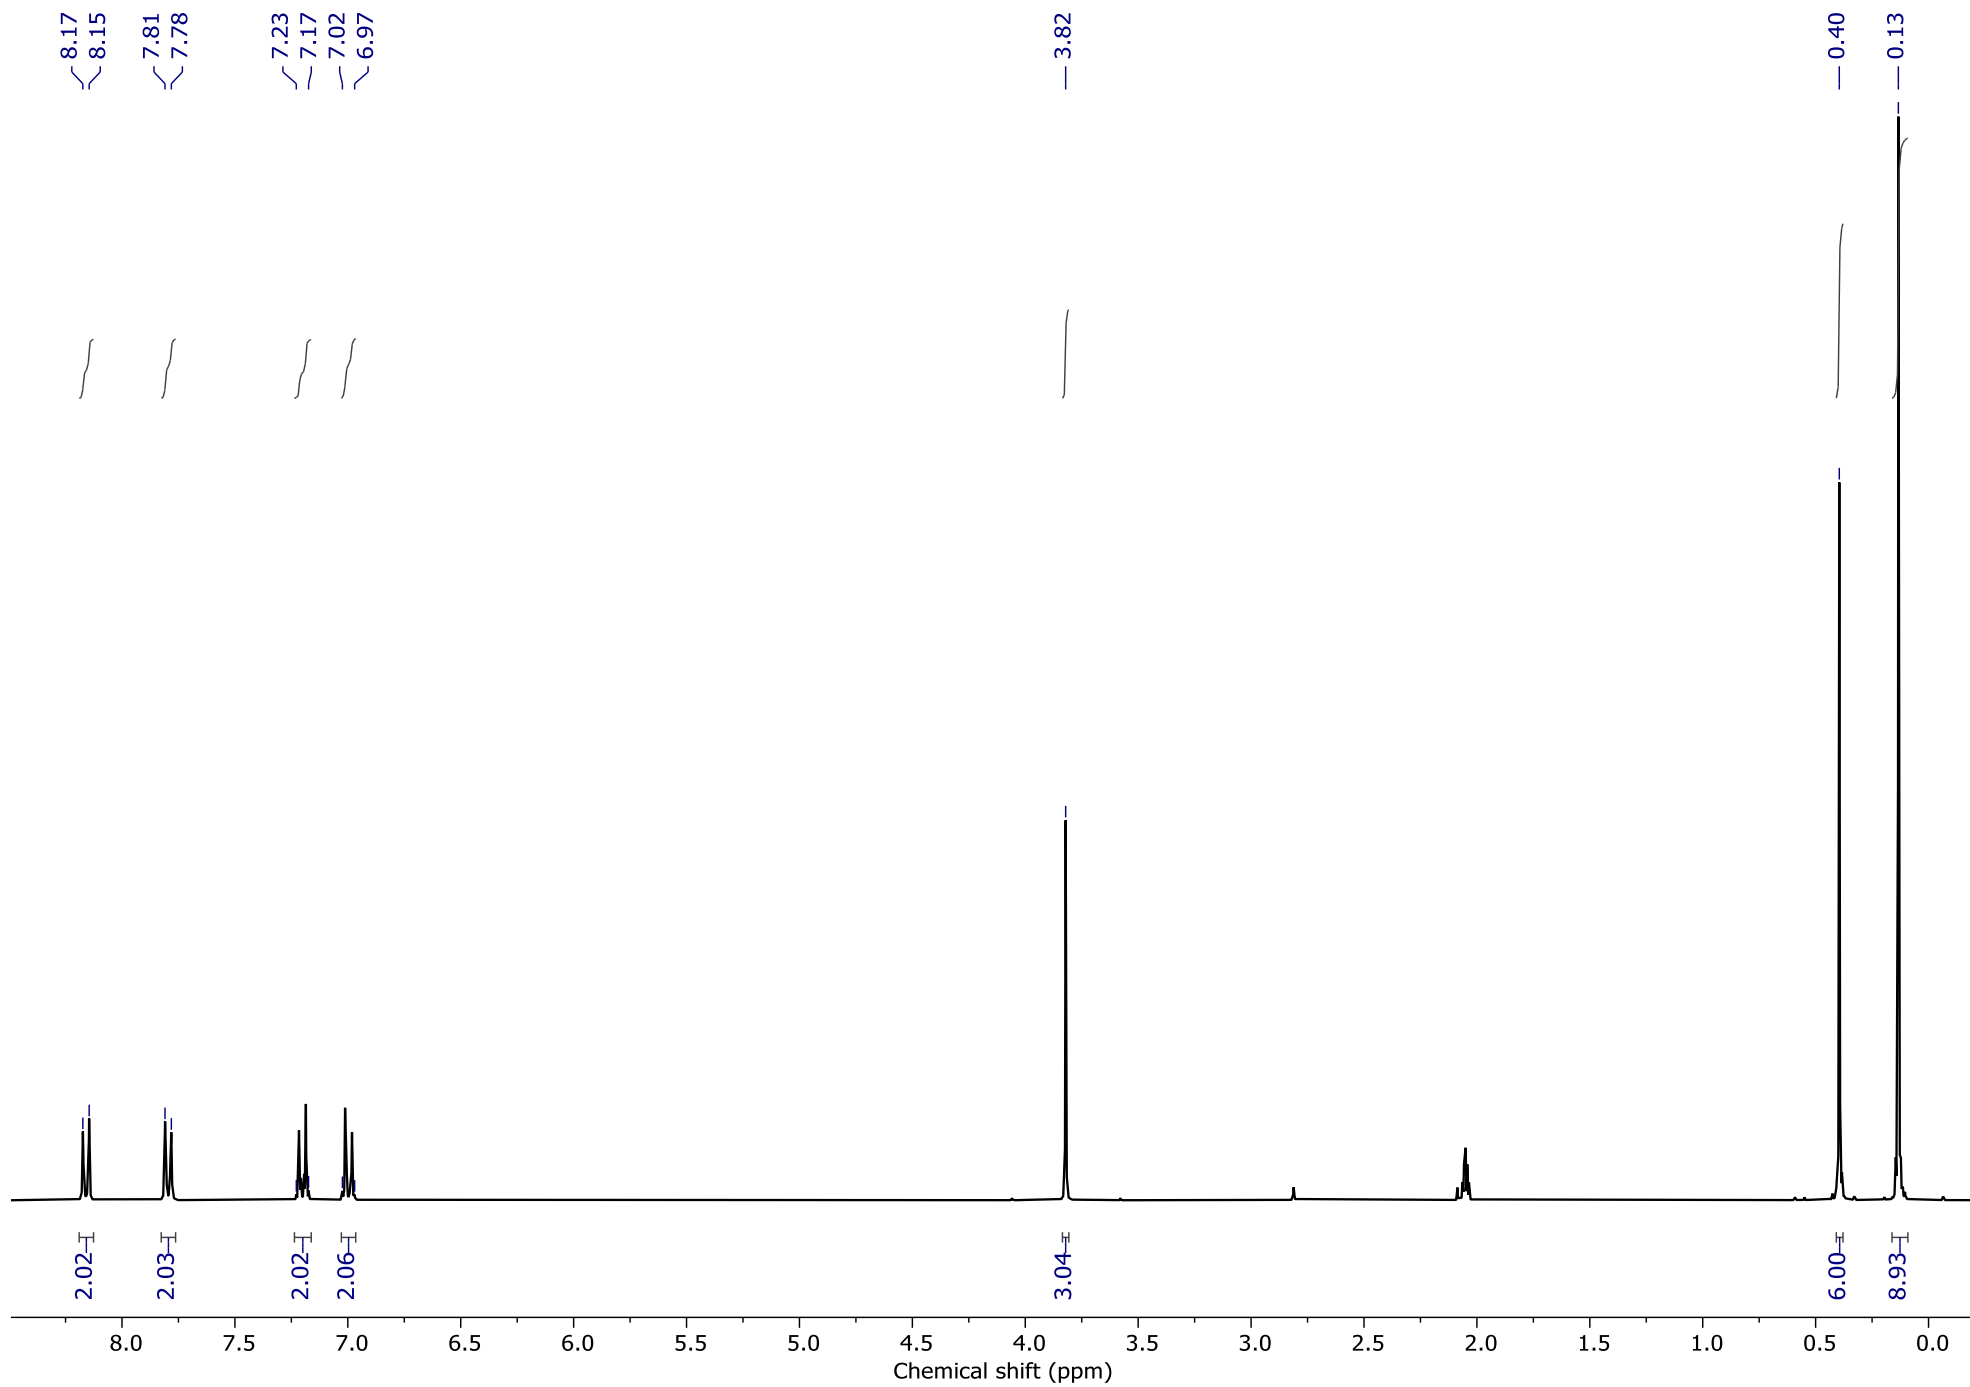



<sup>13</sup>C NMR

(100 MHz, acetone-d<sub>6</sub>)

S49

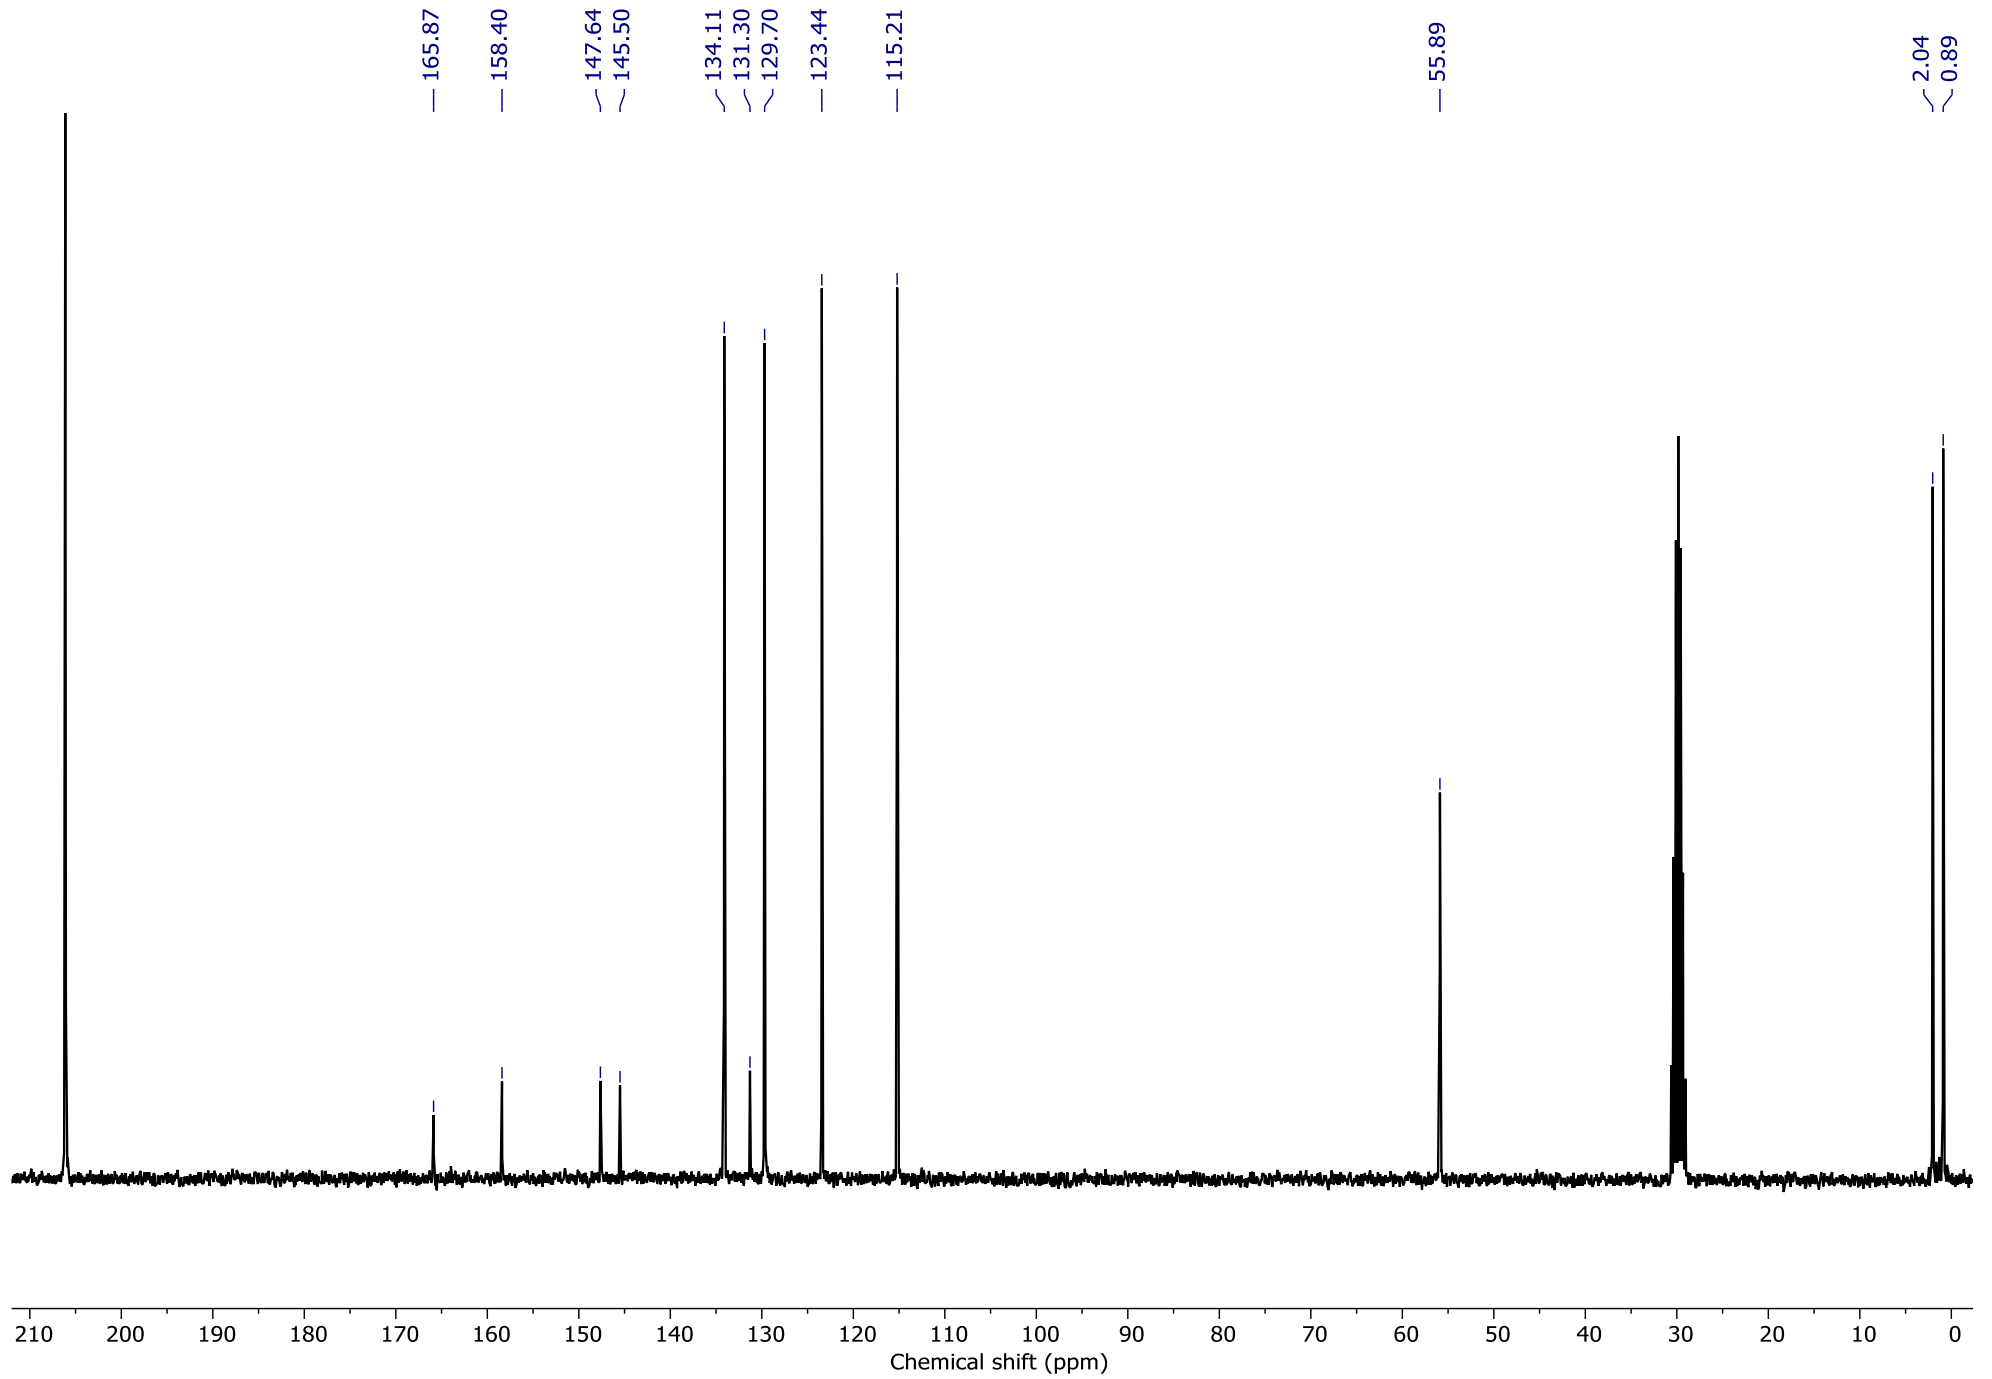

$^{29}\text{Si}$  NMR  
(80 MHz, acetone-d<sub>6</sub>)

S50

9.38

-2.38

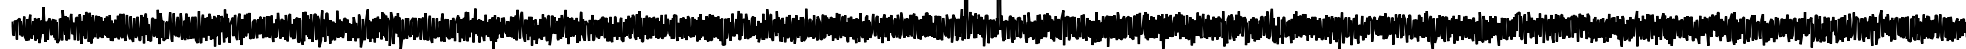

Chemical shift (ppm)

$^1\text{H} - ^{13}\text{C}$  HMBC

(400 MHz, acetone- $d_6$ )

S51

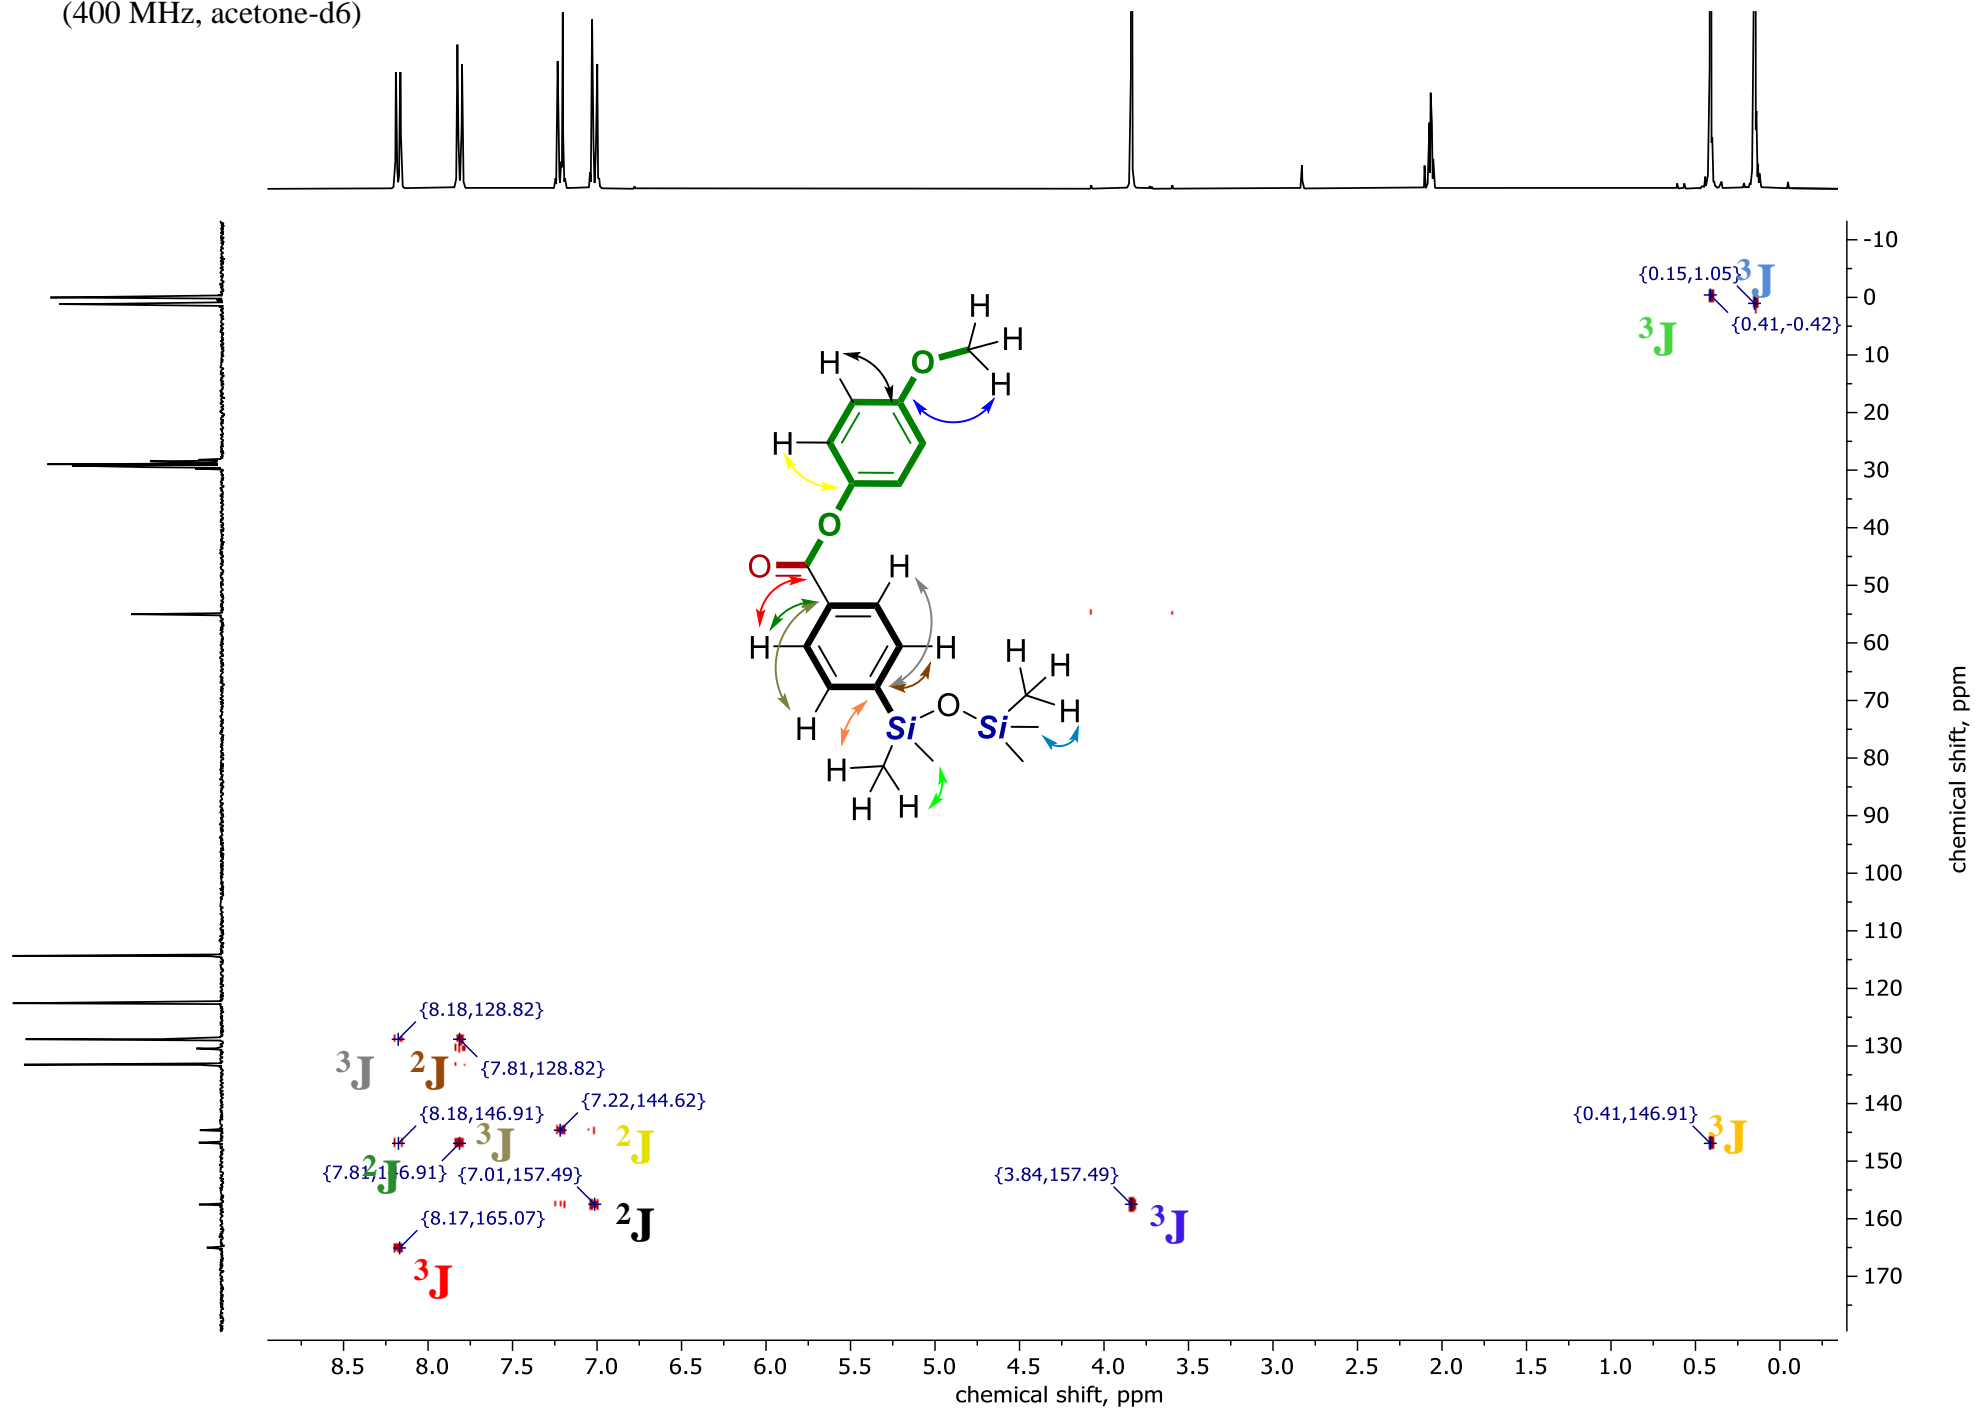

$^1\text{H} - ^{13}\text{C}$  HSQC  
(400 MHz, acetone- $d_6$ )

S52

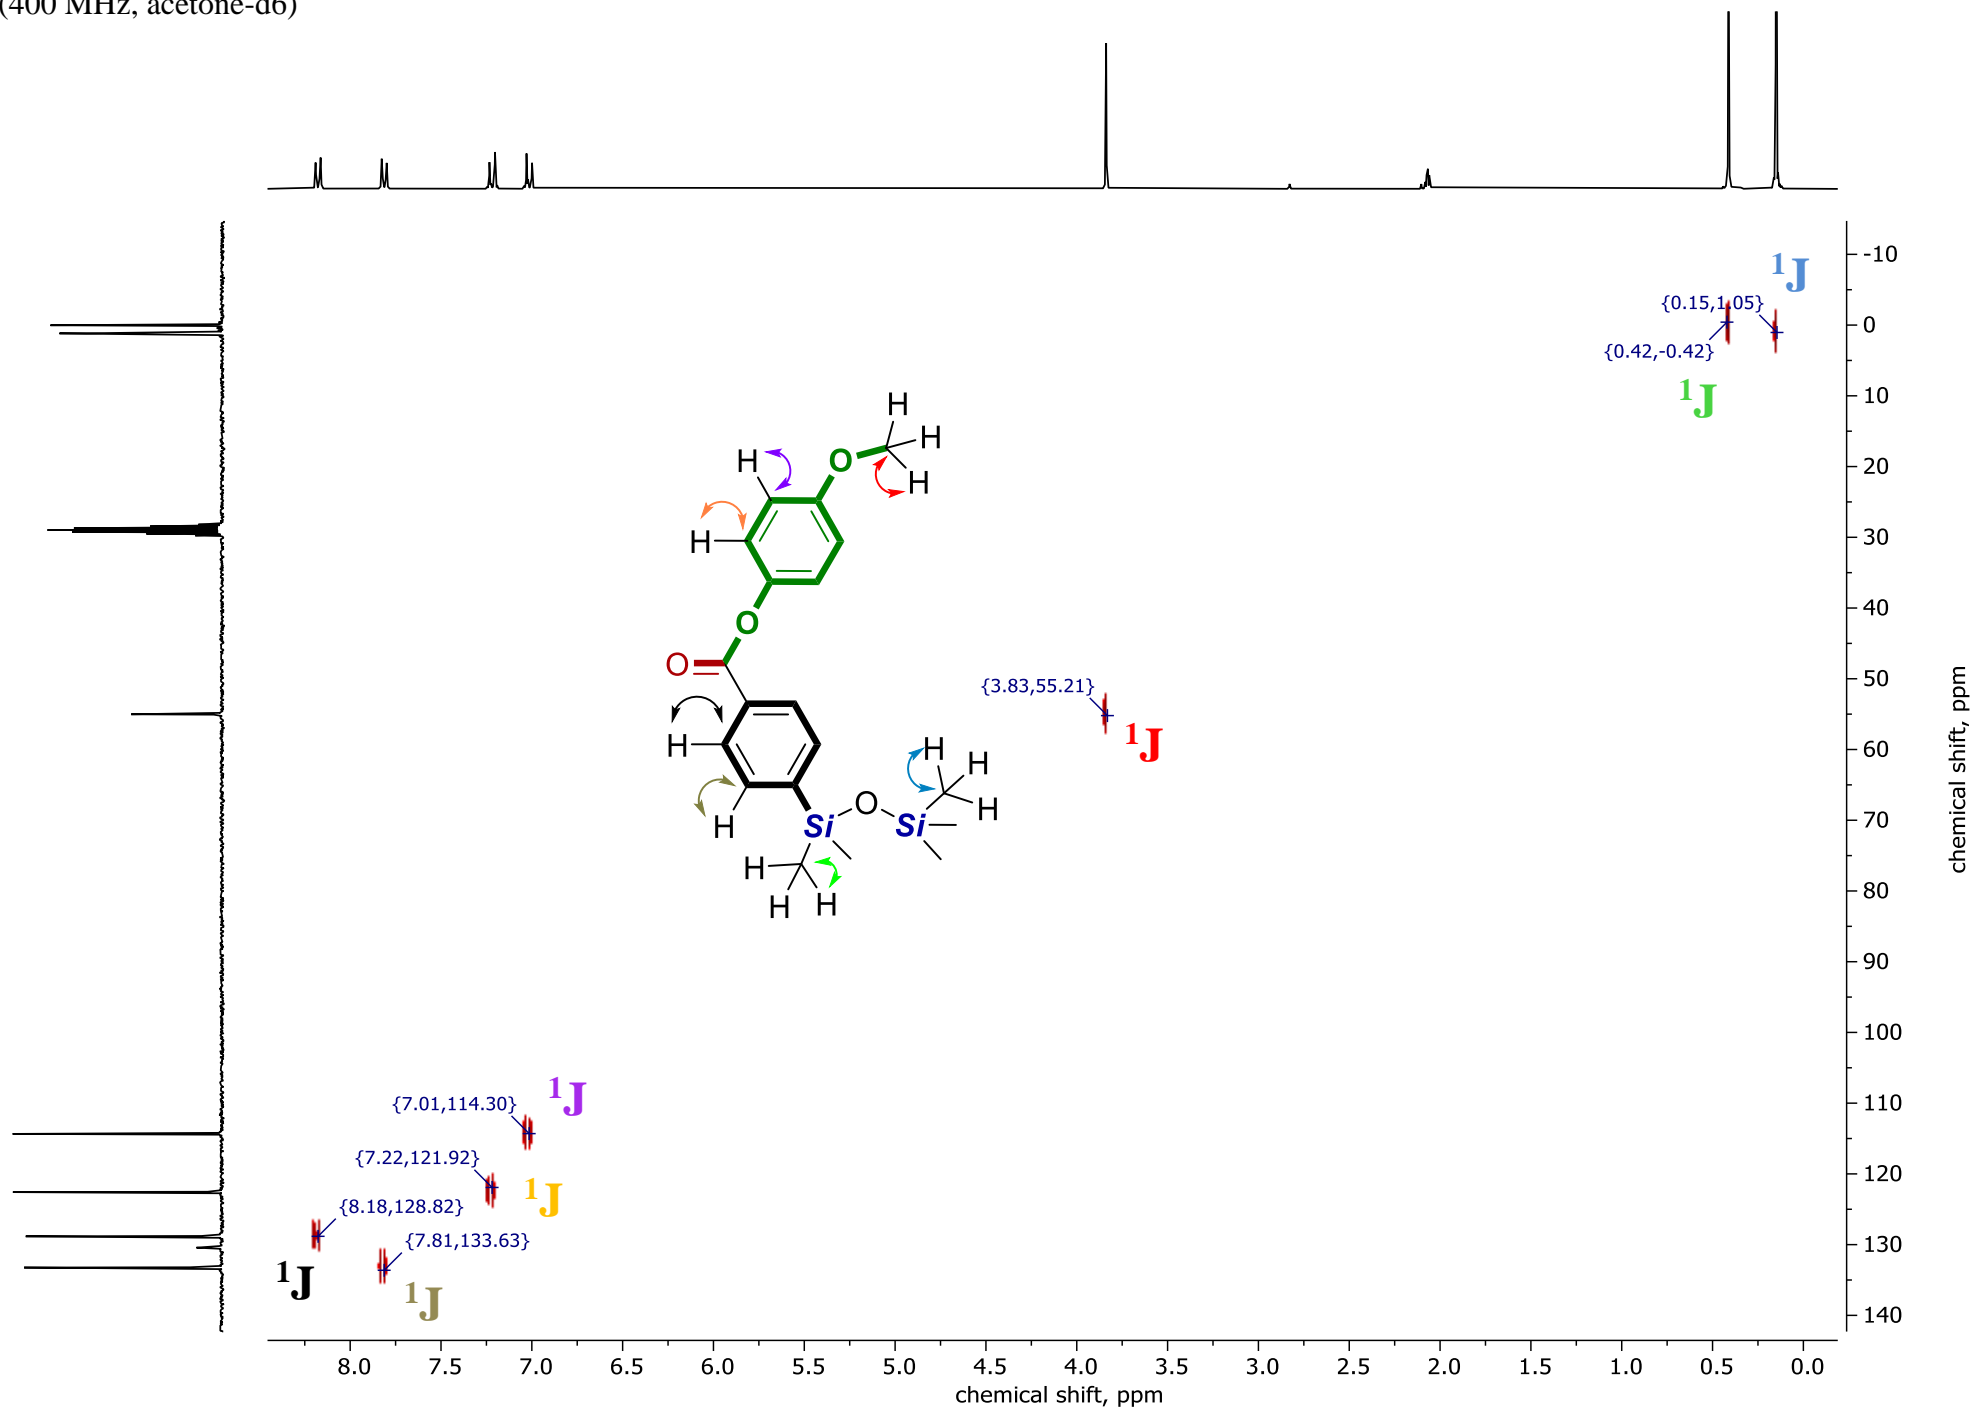

$^1\text{H} - ^{29}\text{Si}$  HMBC  
(400 MHz, acetone- $d_6$ )

S53

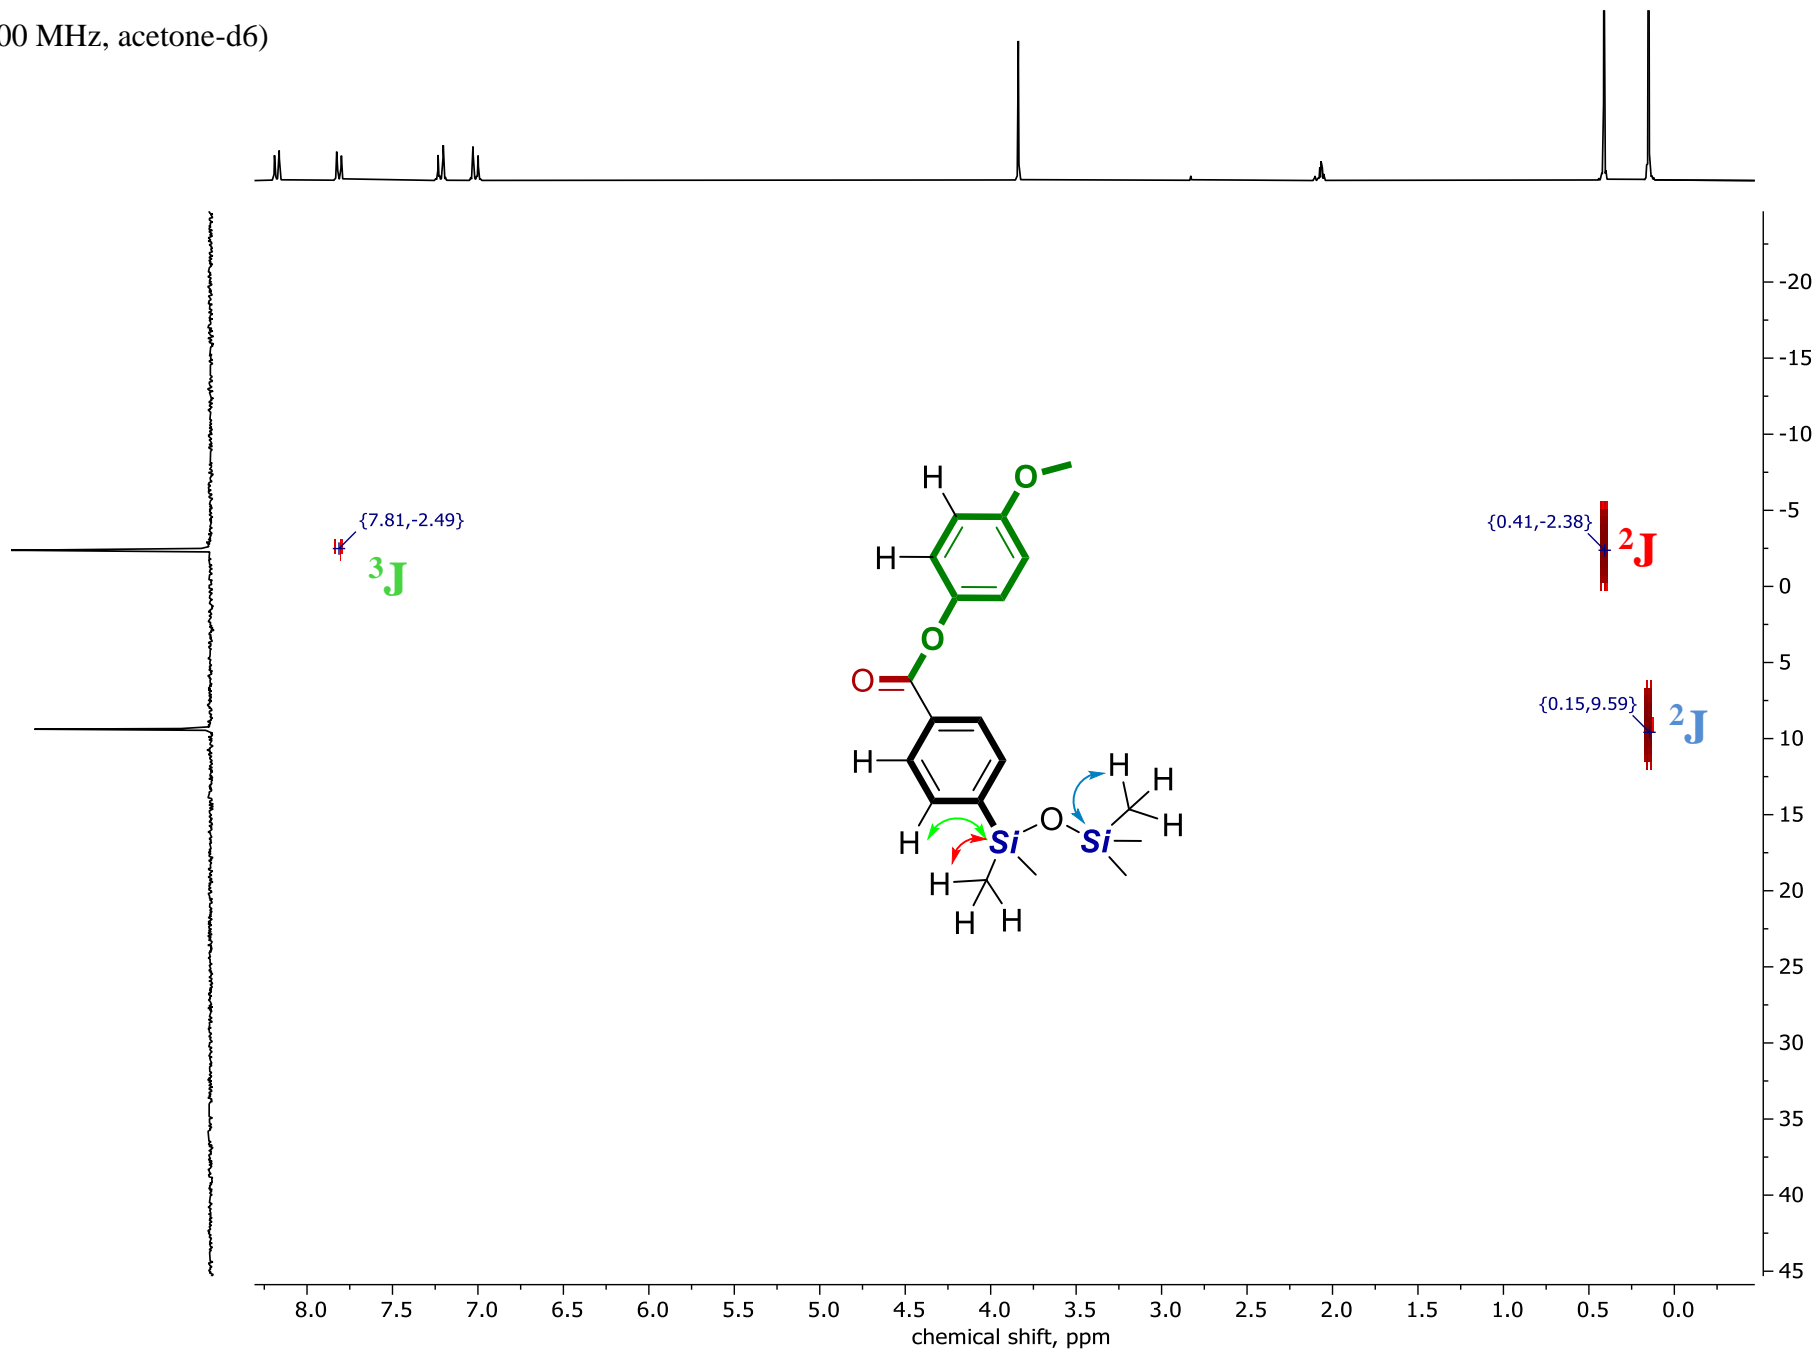

S54

IR spectrum

— 2956

— 2837

— 1734

— 1609

— 1507

— 1389

— 1255

— 1196

— 1066

— 871

— 638

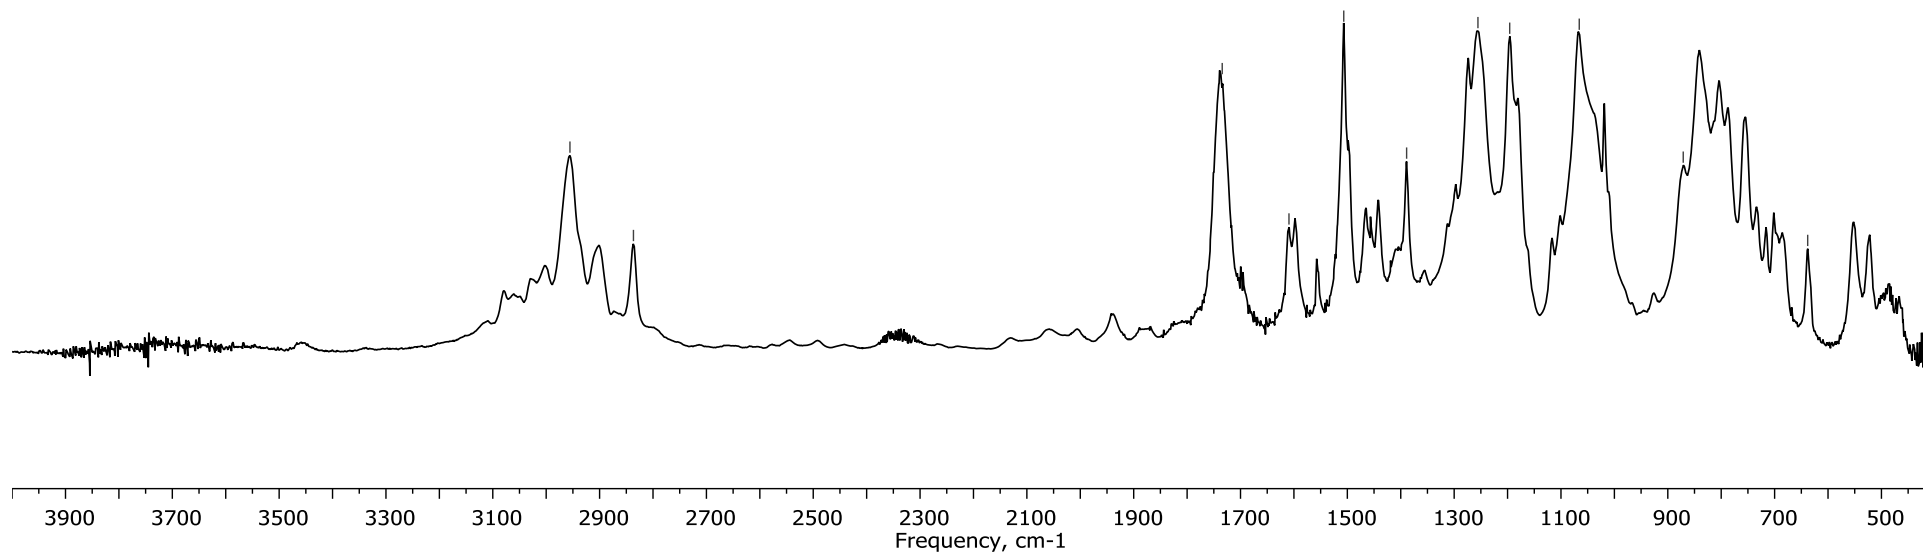

## HRMS (ESI)

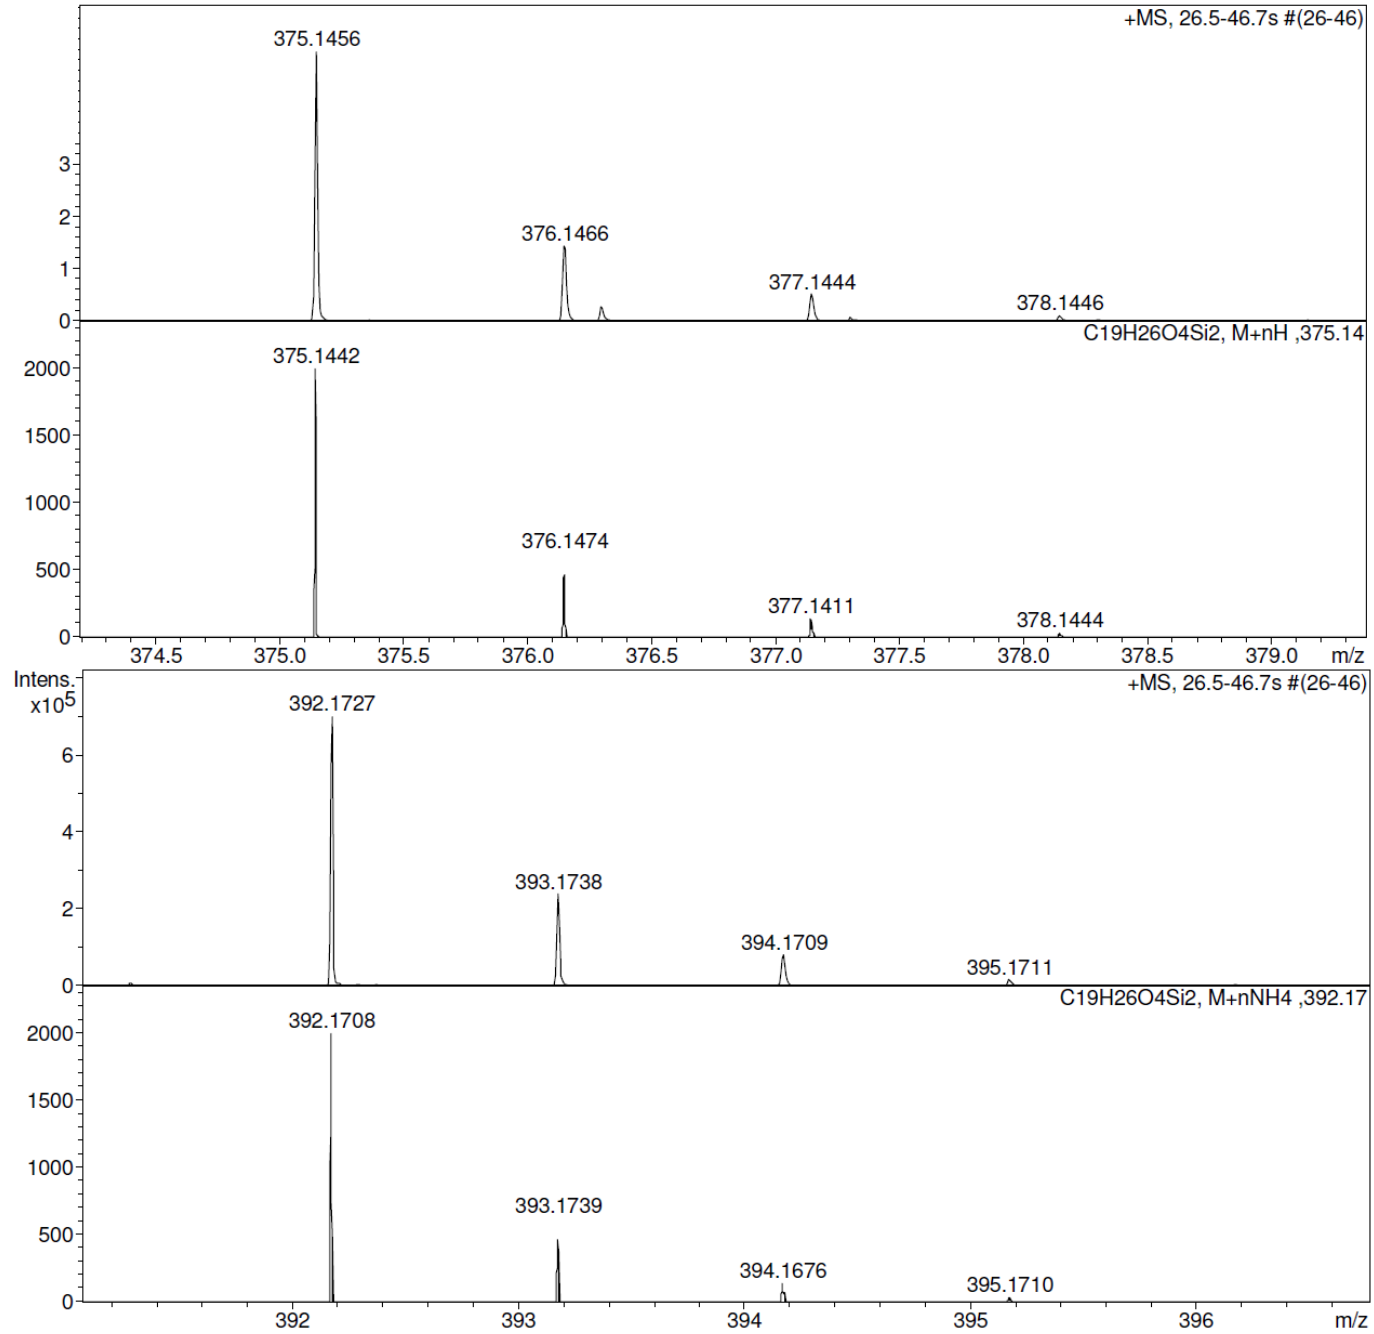

S56

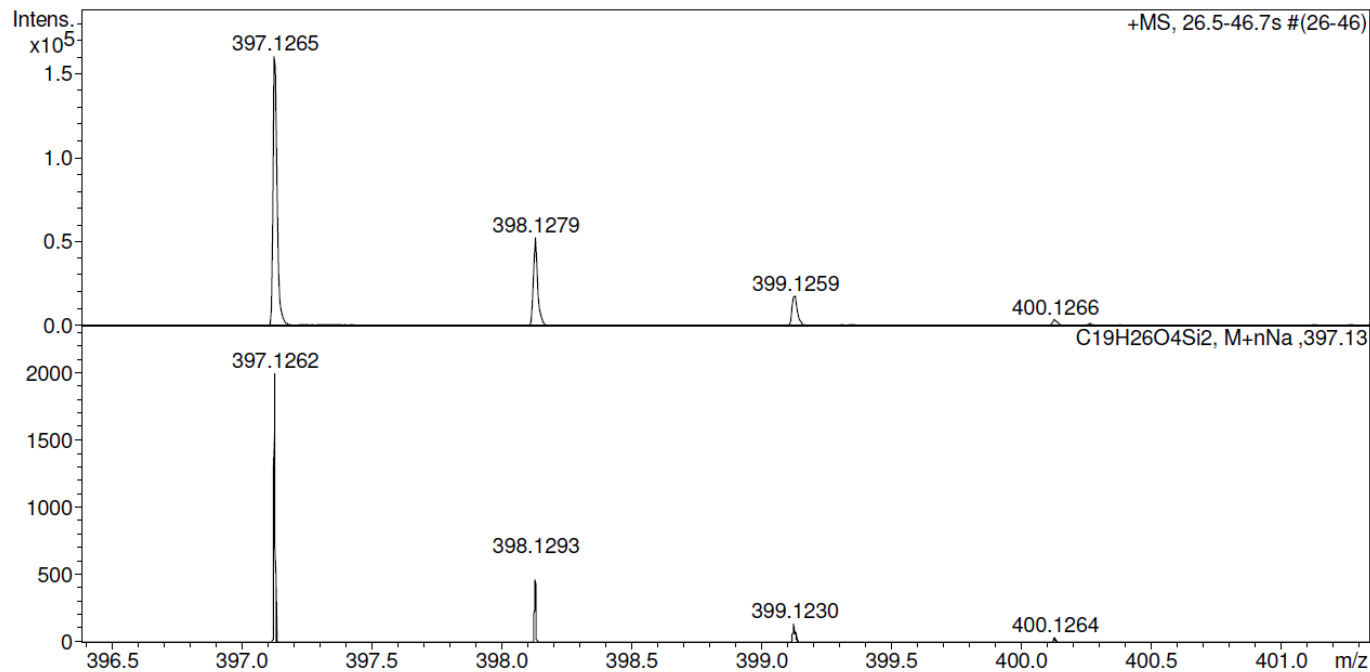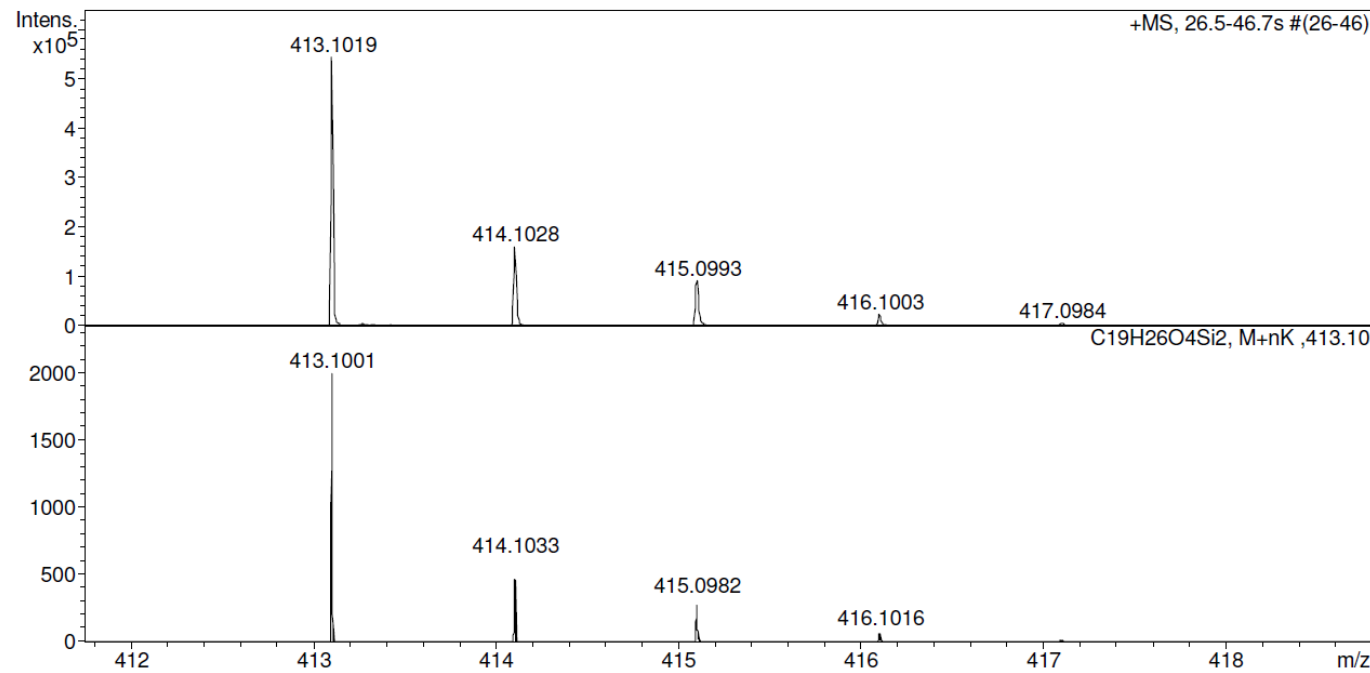



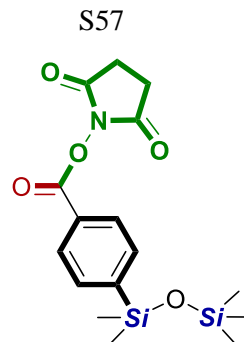

**Characterisation data for 2,5-dioxopyrrolidin-1-yl 4-(1,1,3,3,3-pentamethyldisiloxanyl)benzoate:**

$^1\text{H}$  NMR (400 MHz, acetone- $d_6$ ):  $\delta = 8.07$  (d,  $^3J=8$  Hz, 2H),  $\delta = 7.79$  (d,  $^3J=8$  Hz, 2H),  $\delta = 2.92$  (s, 4H),  $\delta = 0.34$  (s, 6H),  $\delta = -0.07$  (s, 9H).  $^{13}\text{C}$  NMR (100 MHz, acetone- $d_6$ ):  $\delta = 170.49$ , 162.90, 149.68, 134.50, 129.80, 126.81, 26.38, 2.01, 0.80.  $^{29}\text{Si}$  NMR (80 MHz, acetone- $d_6$ ):  $\delta = 9.68$ , -2.40.  $^{15}\text{N}$  NMR (40 MHz, acetone- $d_6$ ):  $\delta = 198.61$ . HRMS (ESI)  $m/z$   $[\text{M} + \text{H}]^+$ : calcd for  $[\text{C}_{16}\text{H}_{23}\text{NO}_5\text{Si}_2 + \text{H}]^+$ , 366.1188; found, 366.1190;  $[\text{M} + \text{Na}]^+$ : calcd for  $[\text{C}_{16}\text{H}_{23}\text{NO}_5\text{Si}_2 + \text{Na}]^+$ , 388.1007; found, 388.1015;  $[\text{M} + \text{K}]^+$ : calcd for  $[\text{C}_{16}\text{H}_{23}\text{NO}_5\text{Si}_2 + \text{K}]^+$ , 404.0746; found, 404.0757. IR ( $\text{cm}^{-1}$ ): 2957, 1774, 1757, 1560, 1427, 1391, 1369, 1254-1186, 1111-987, 842-638.

<sup>1</sup>H NMR

(400 MHz, acetone-d6)

S58

8.08  
8.06  
7.80  
7.78

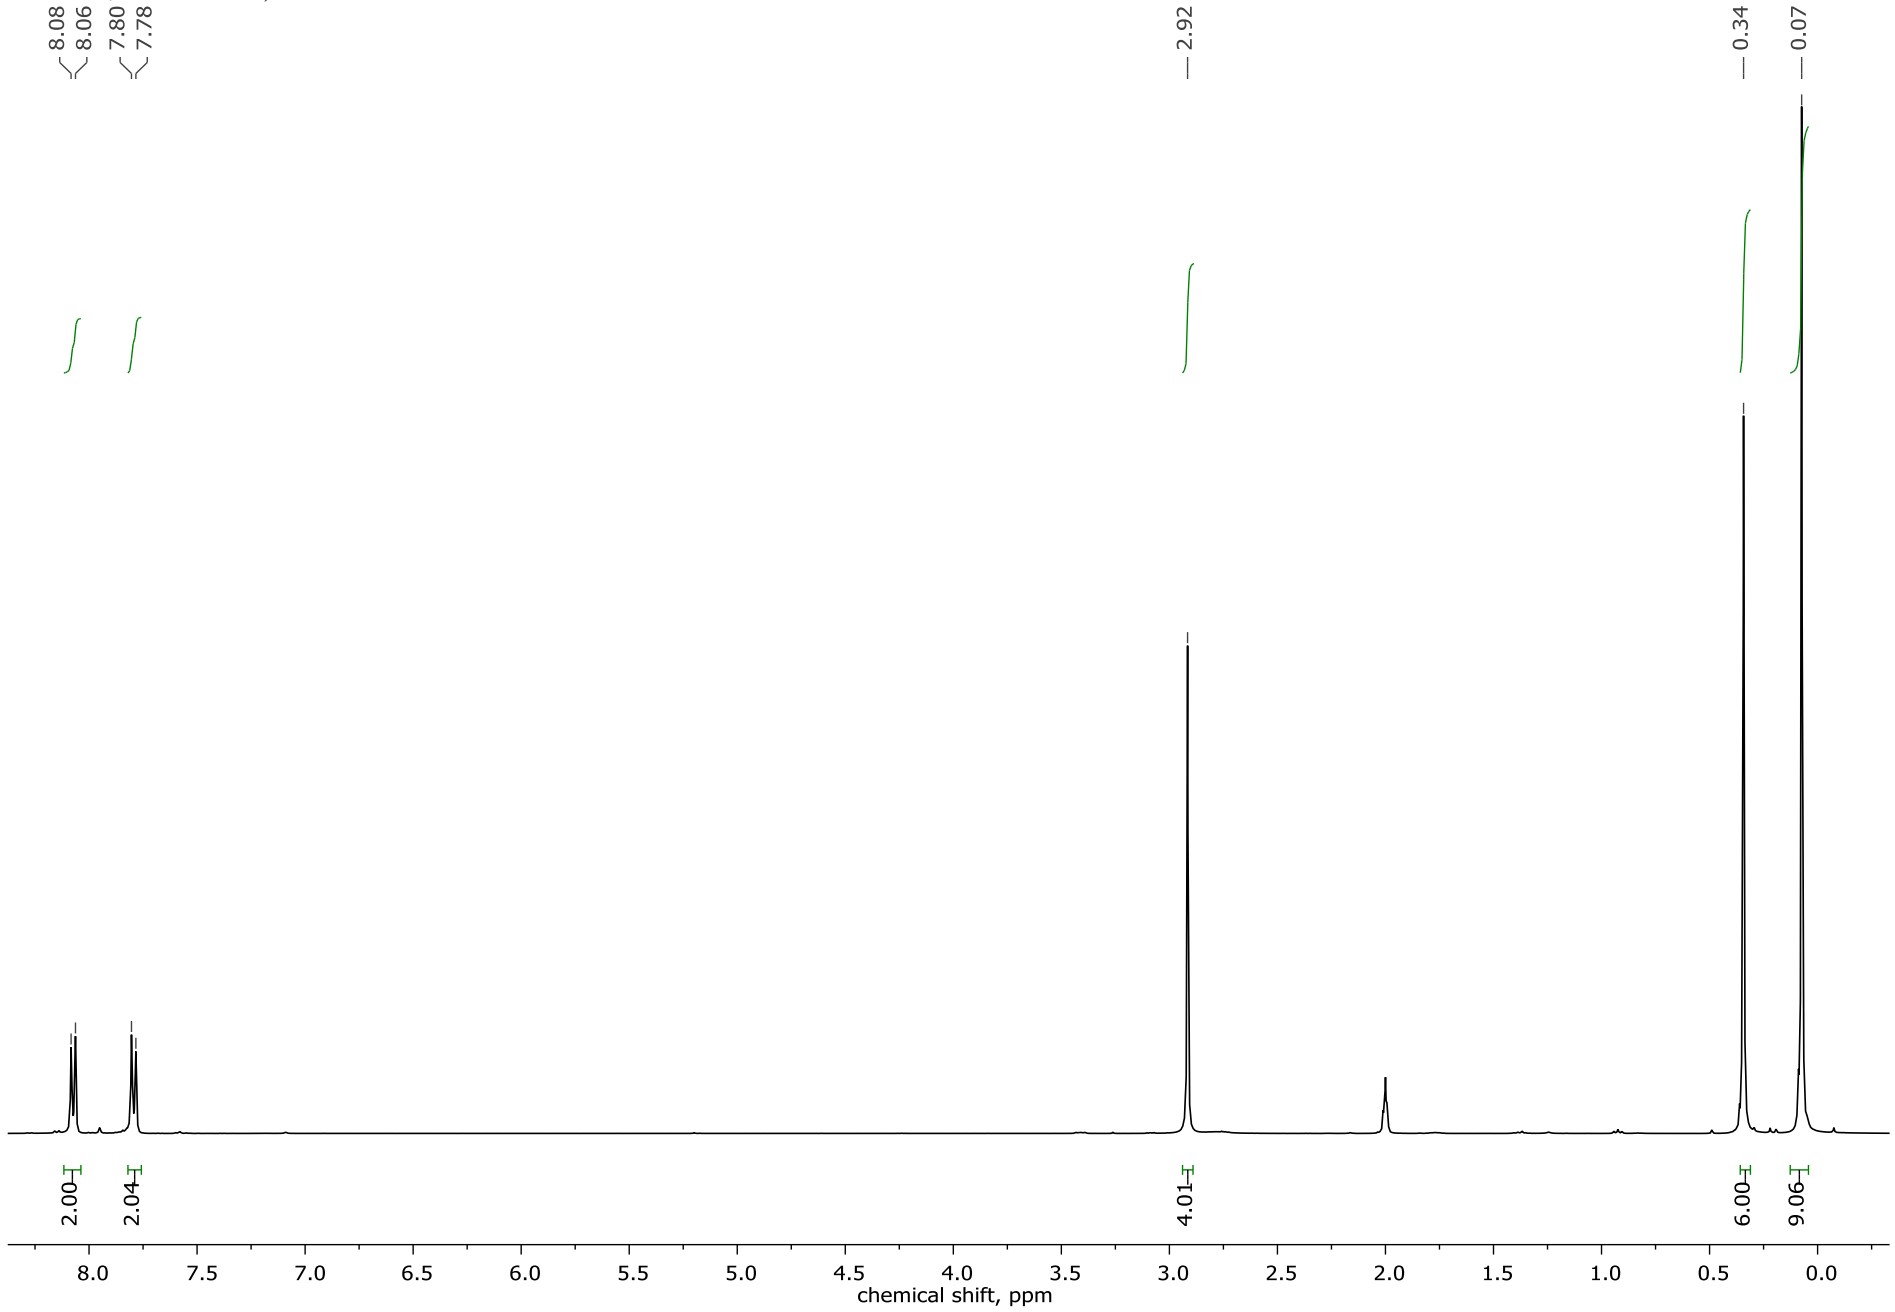

<sup>13</sup>C NMR

(100 MHz, acetone-d6)

S59

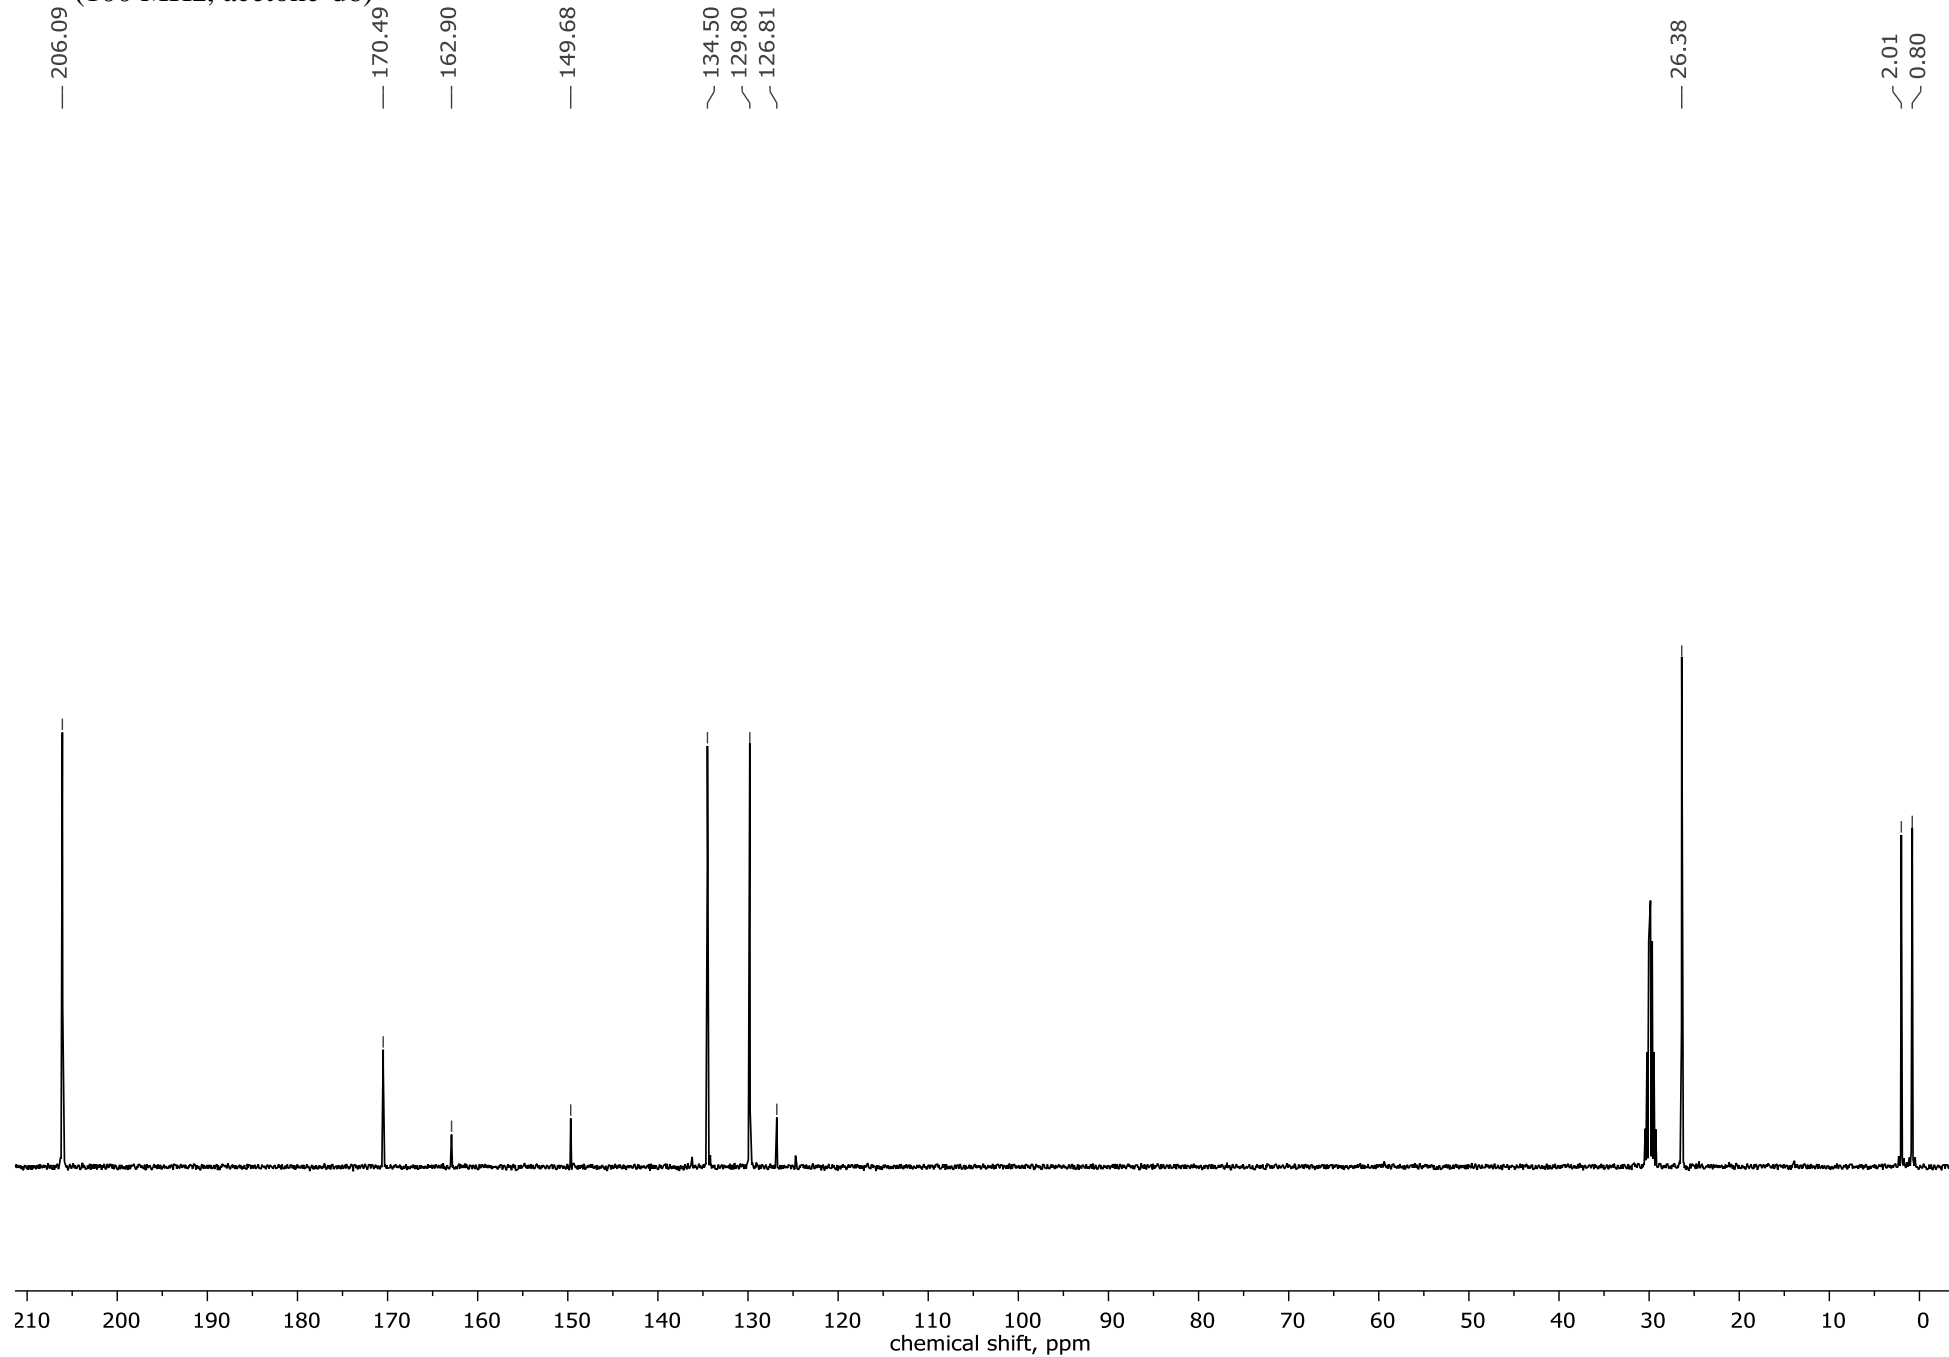

$^{29}\text{Si}$  NMR

(80 MHz, acetone- $d_6$ )

S60

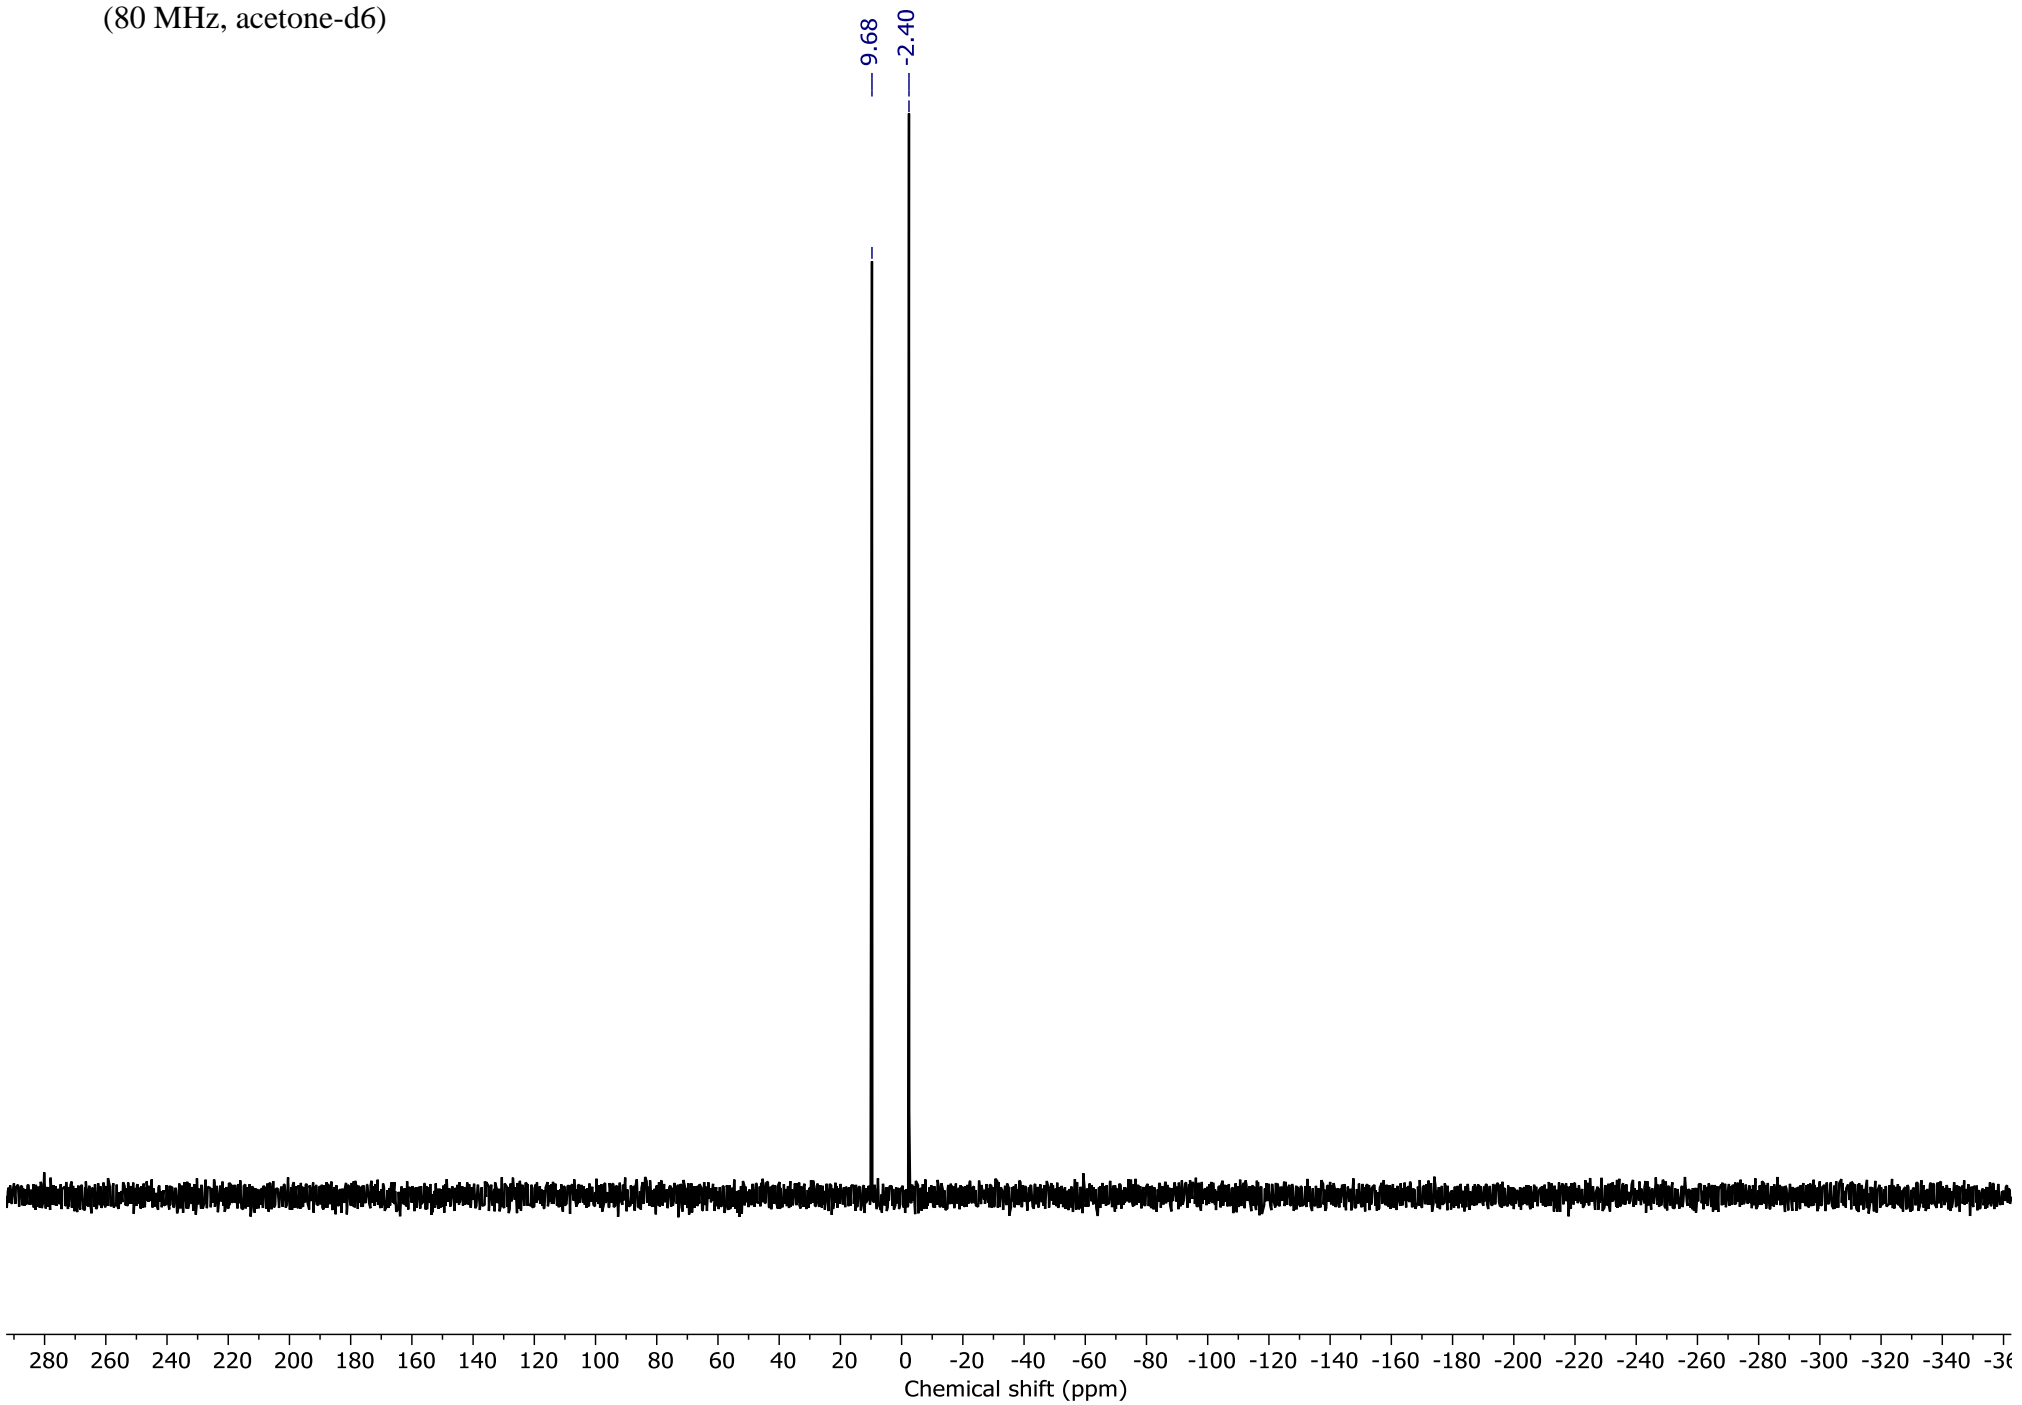

$^{15}\text{N}$  NMR

(40 MHz, acetone- $d_6$ )

S61

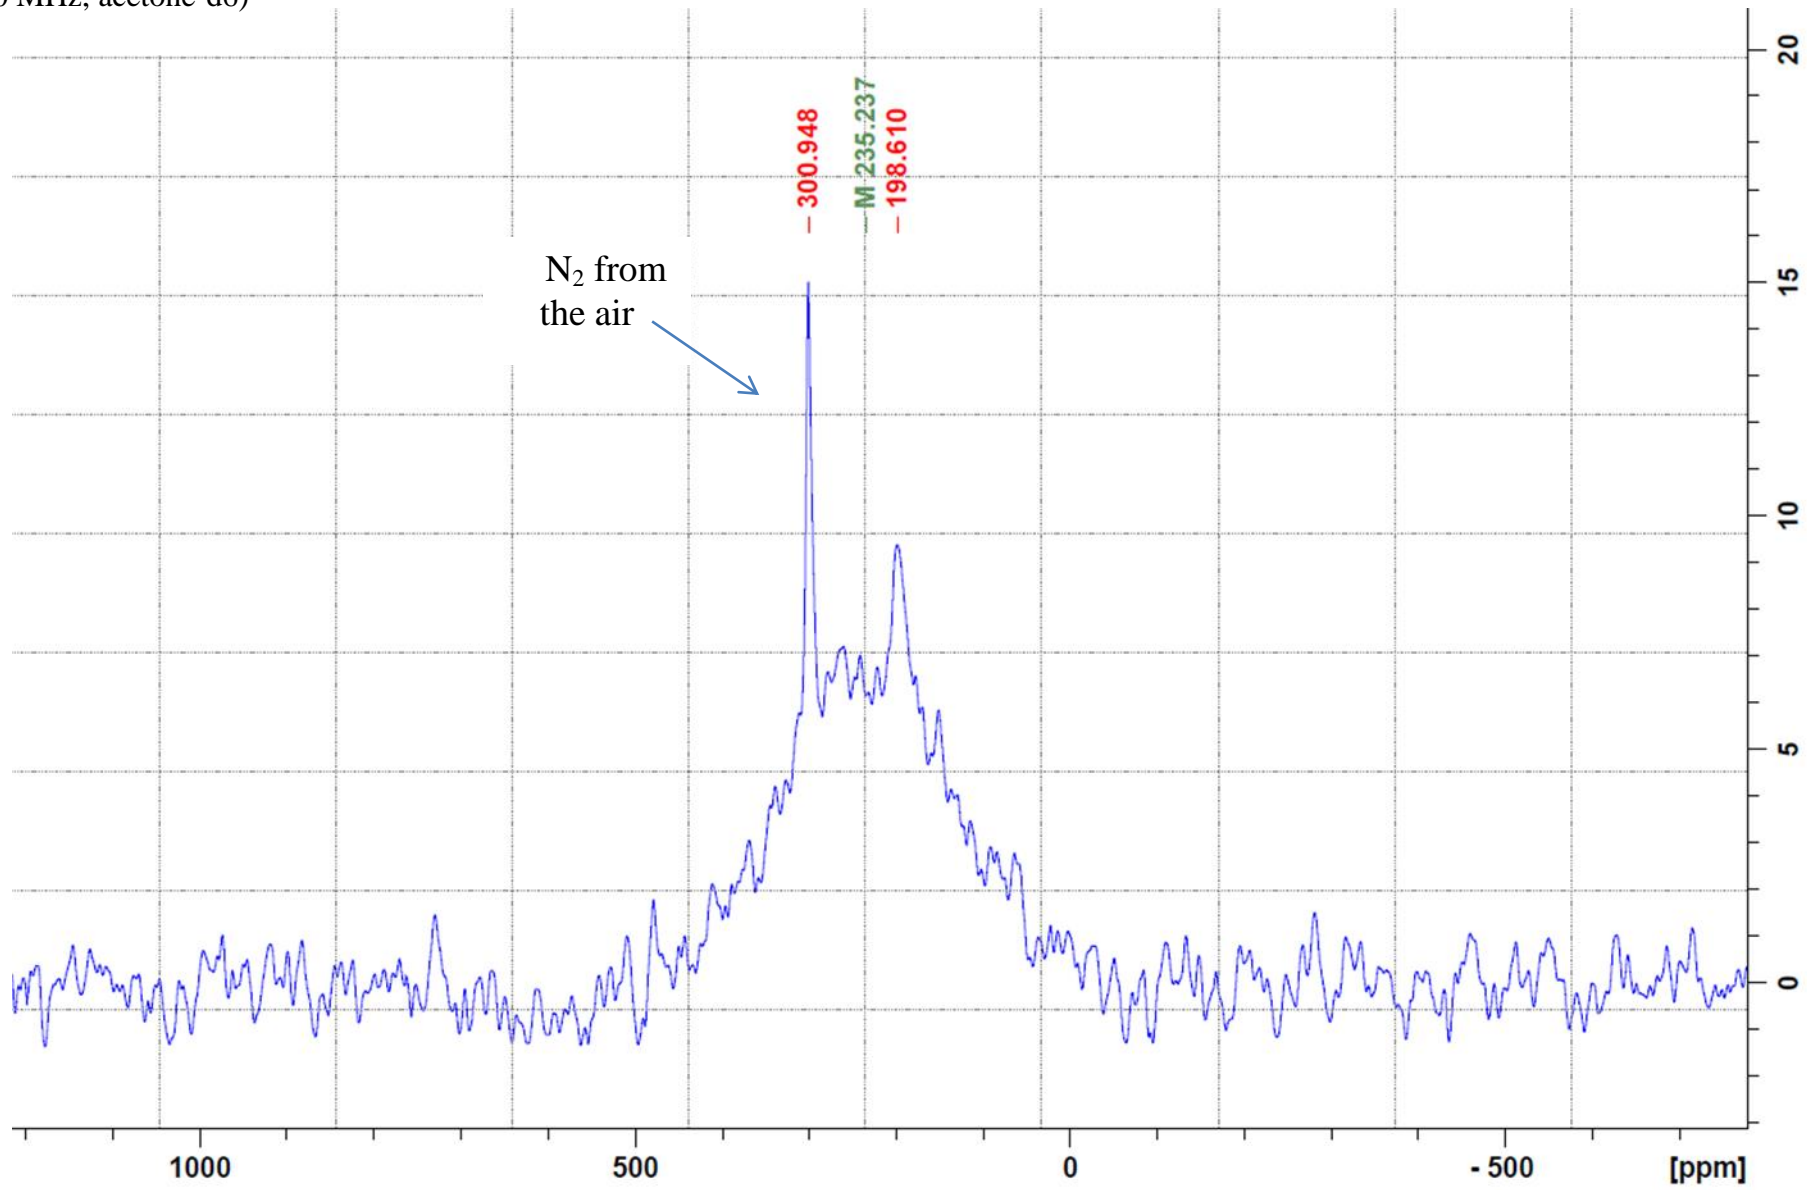

$^1\text{H} - ^{13}\text{C}$  HMBC

S62

(400 MHz, acetone- $d_6$ )

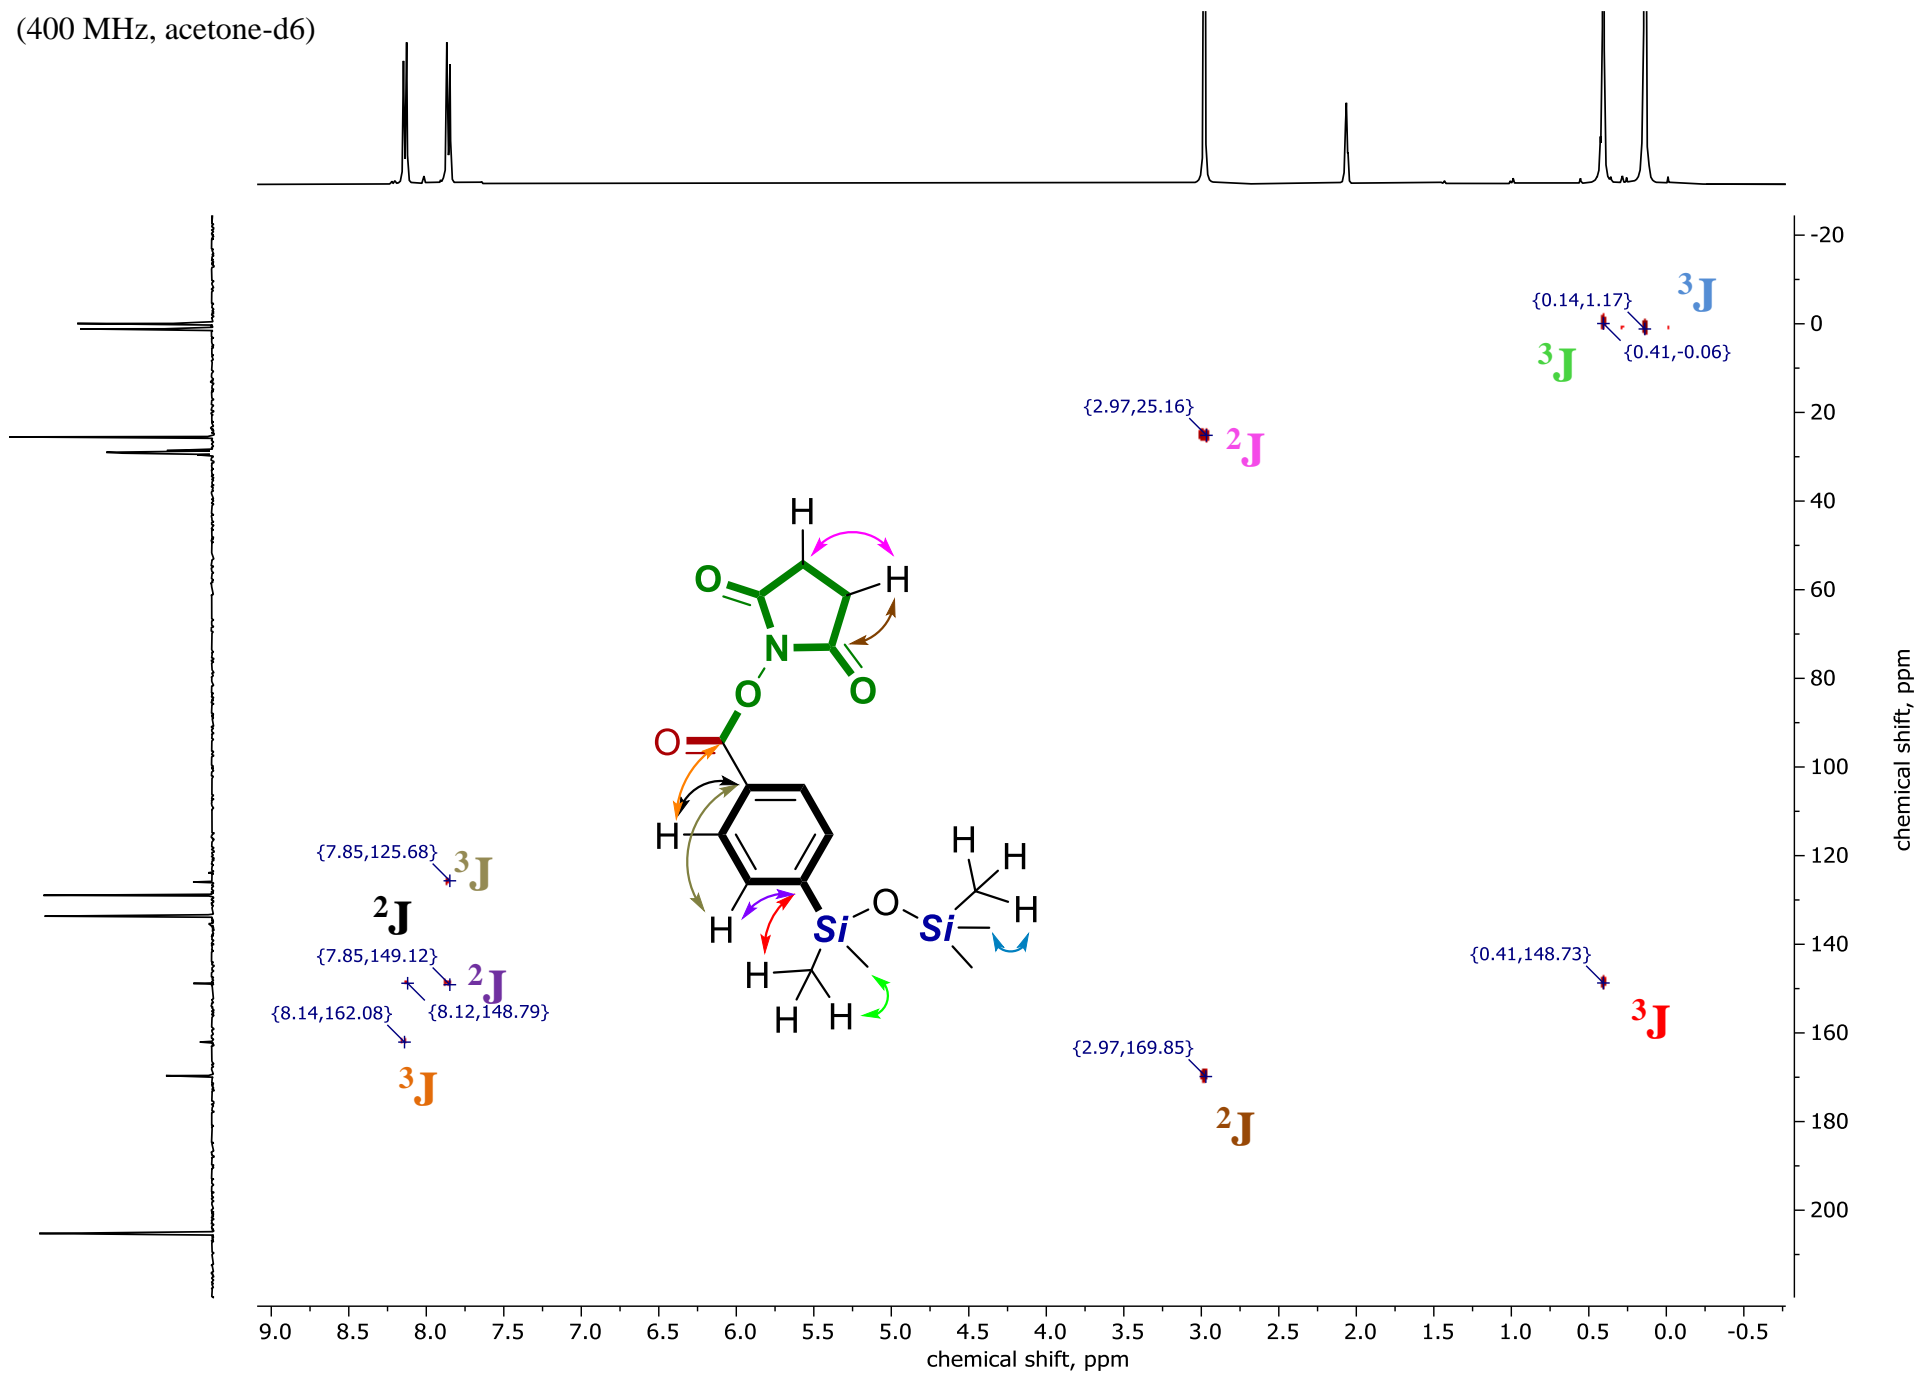

$^1\text{H} - ^{13}\text{C}$  HSQC

S63

(400 MHz, acetone- $d_6$ )

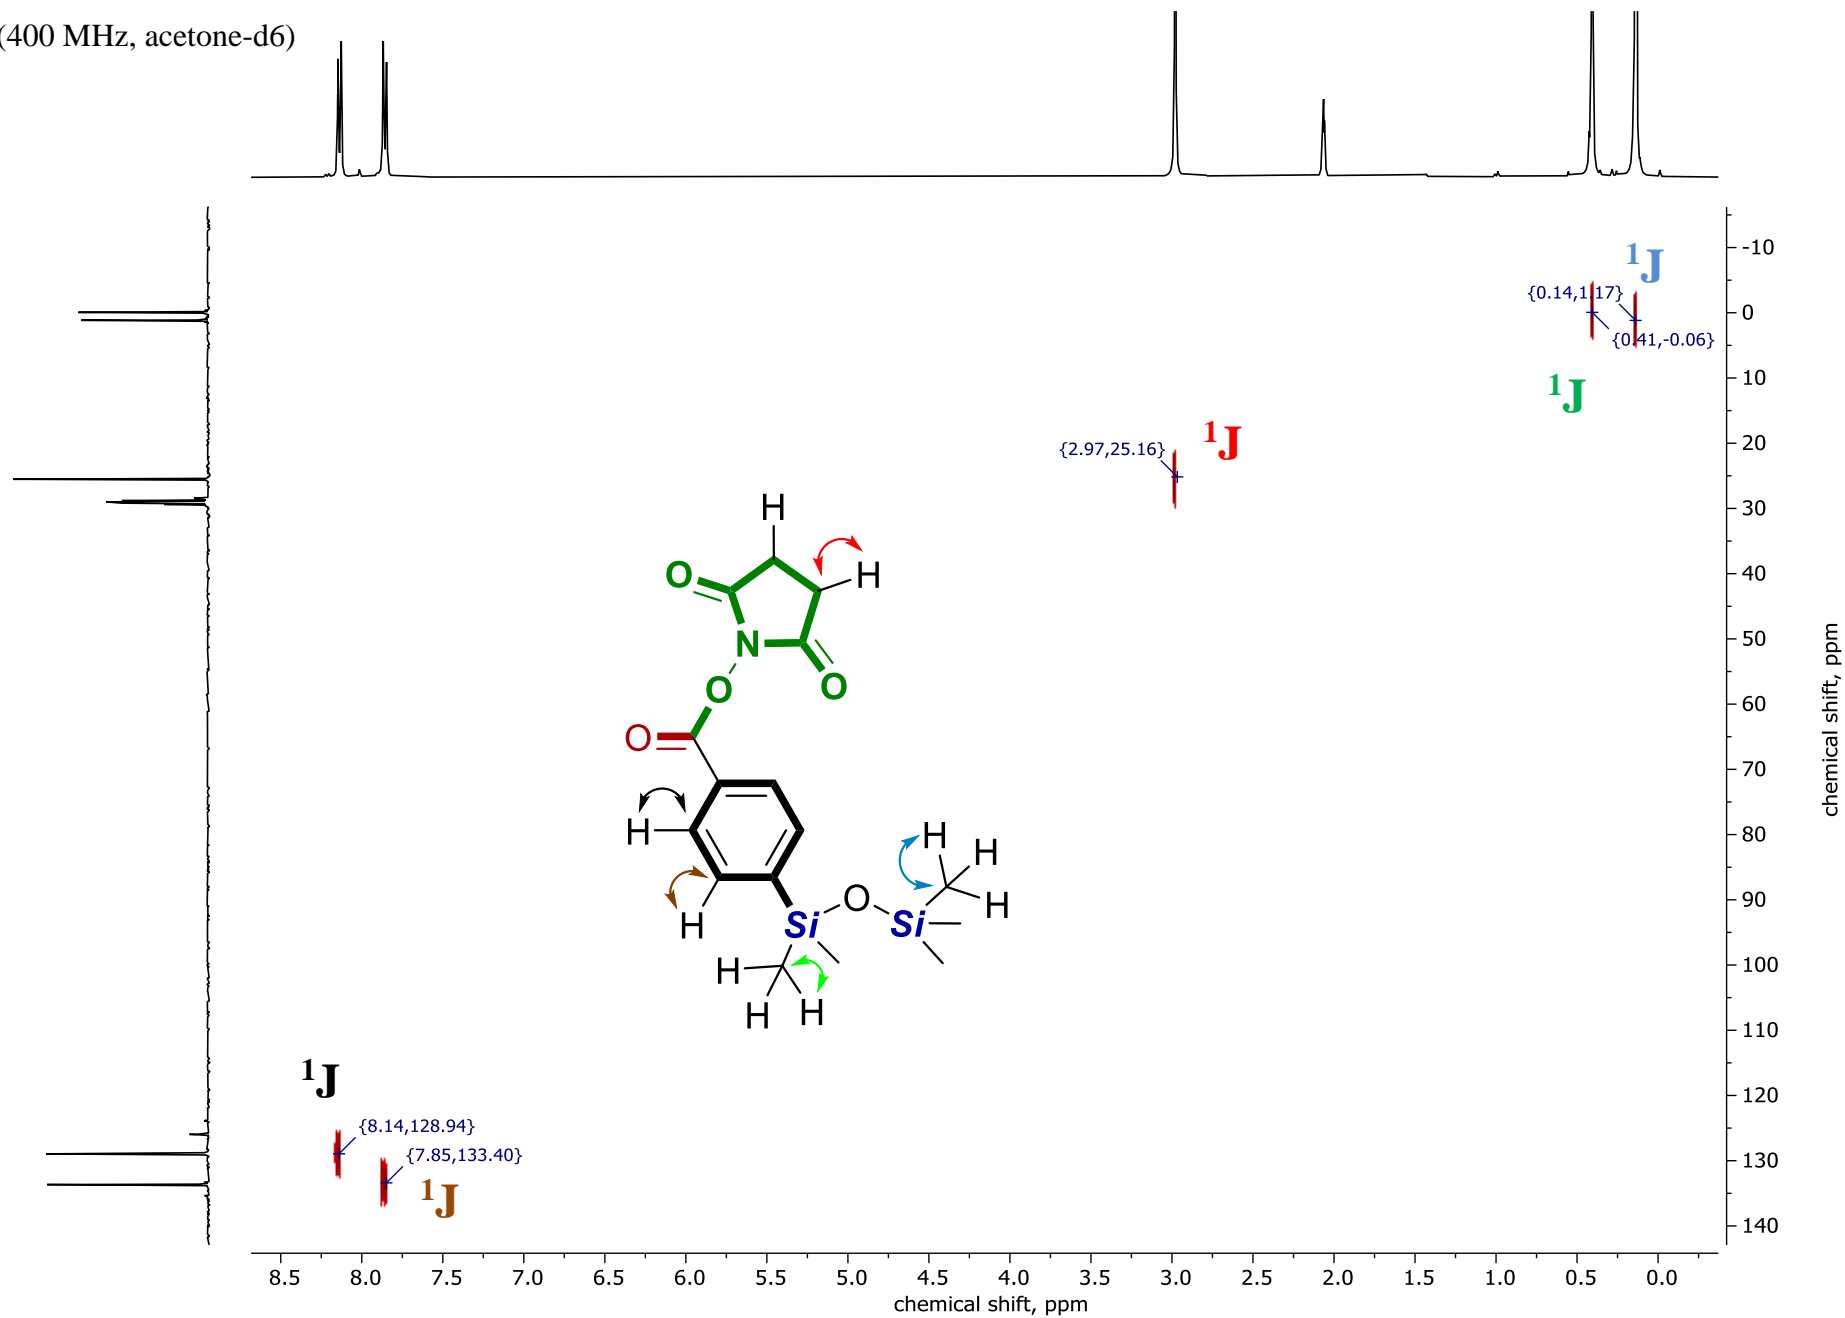

$^1\text{H} - ^{29}\text{Si}$  HMBC  
(400 MHz, acetone- $d_6$ )

S64

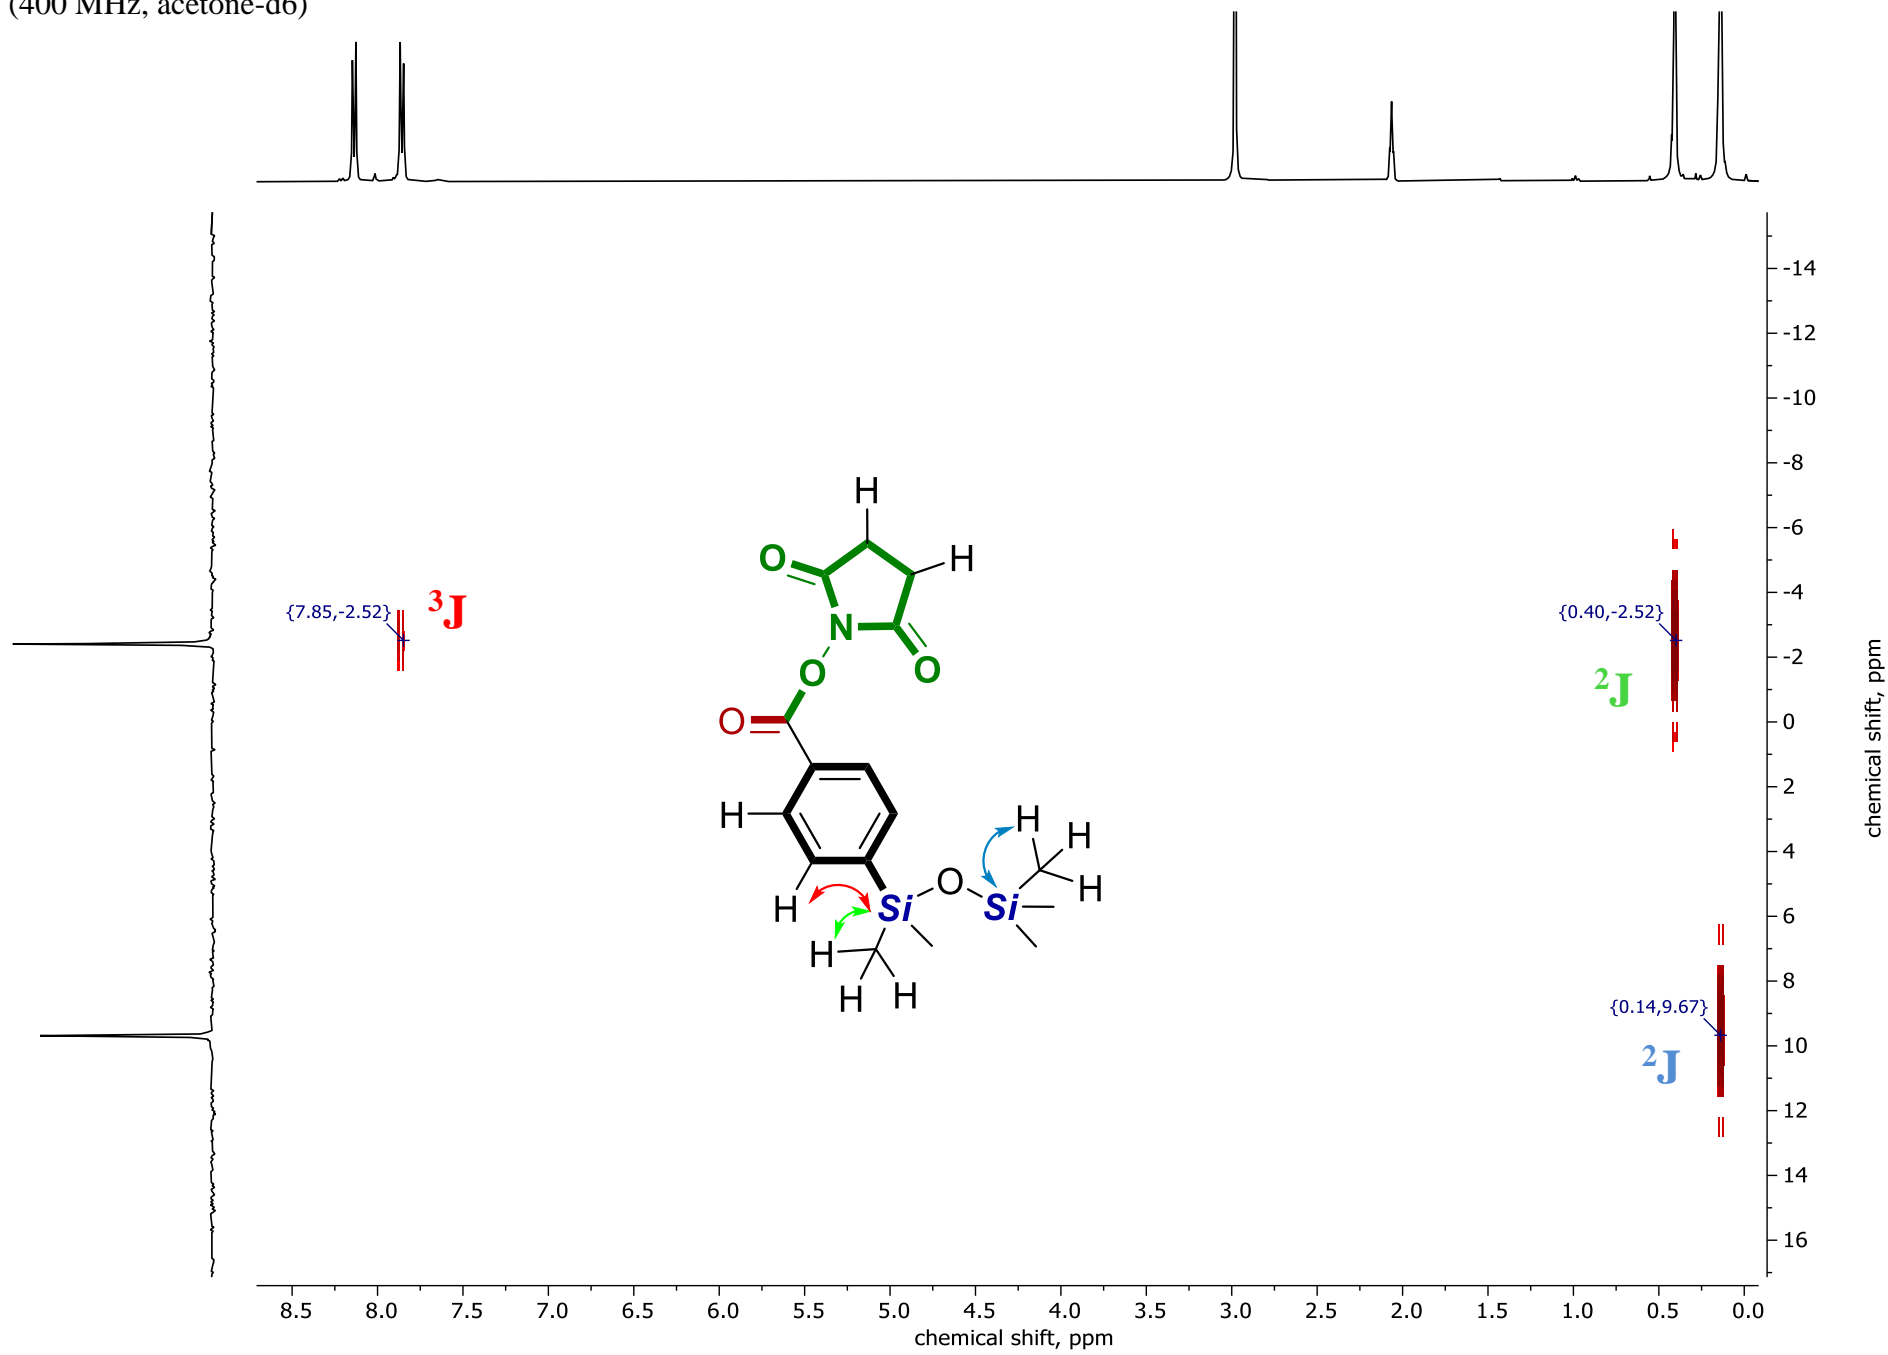



S65

IR spectrum

— 2957

1774  
1757

— 1560

1427  
1391  
1369

1254  
1186  
1111

— 987

— 842

— 638

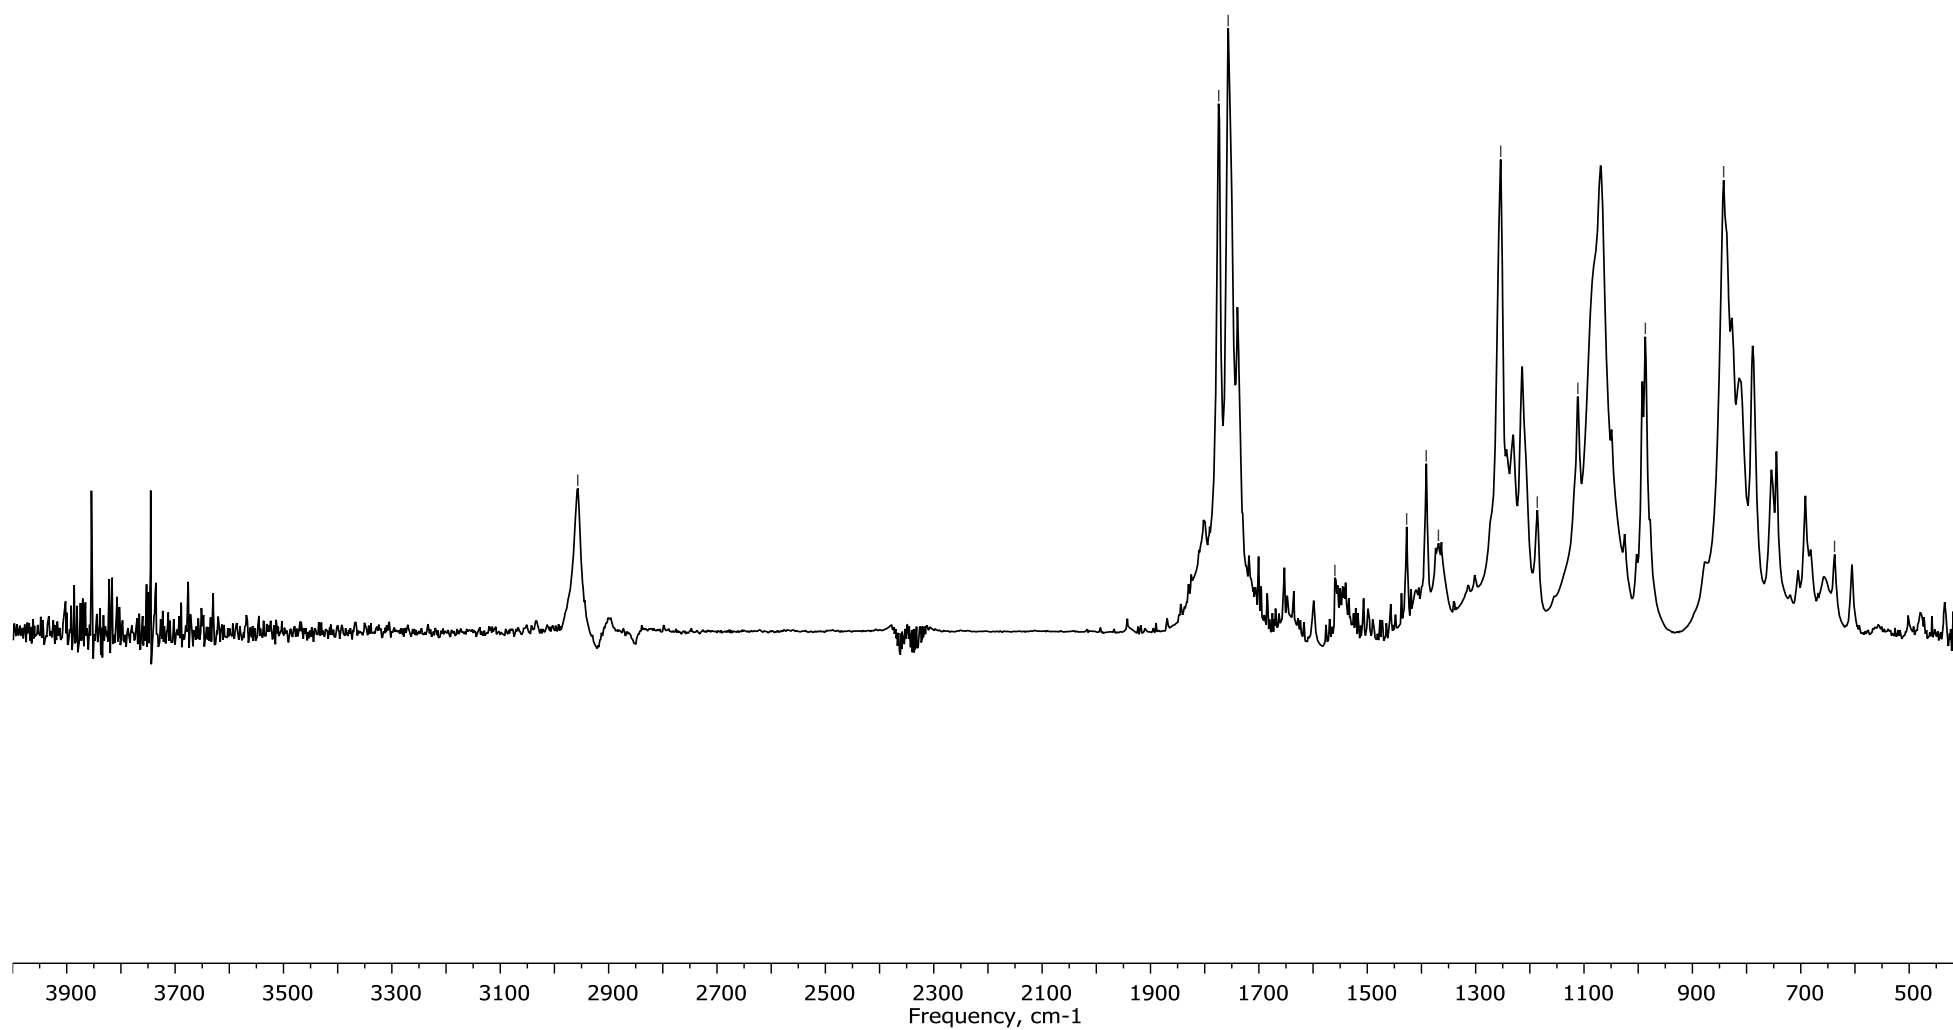

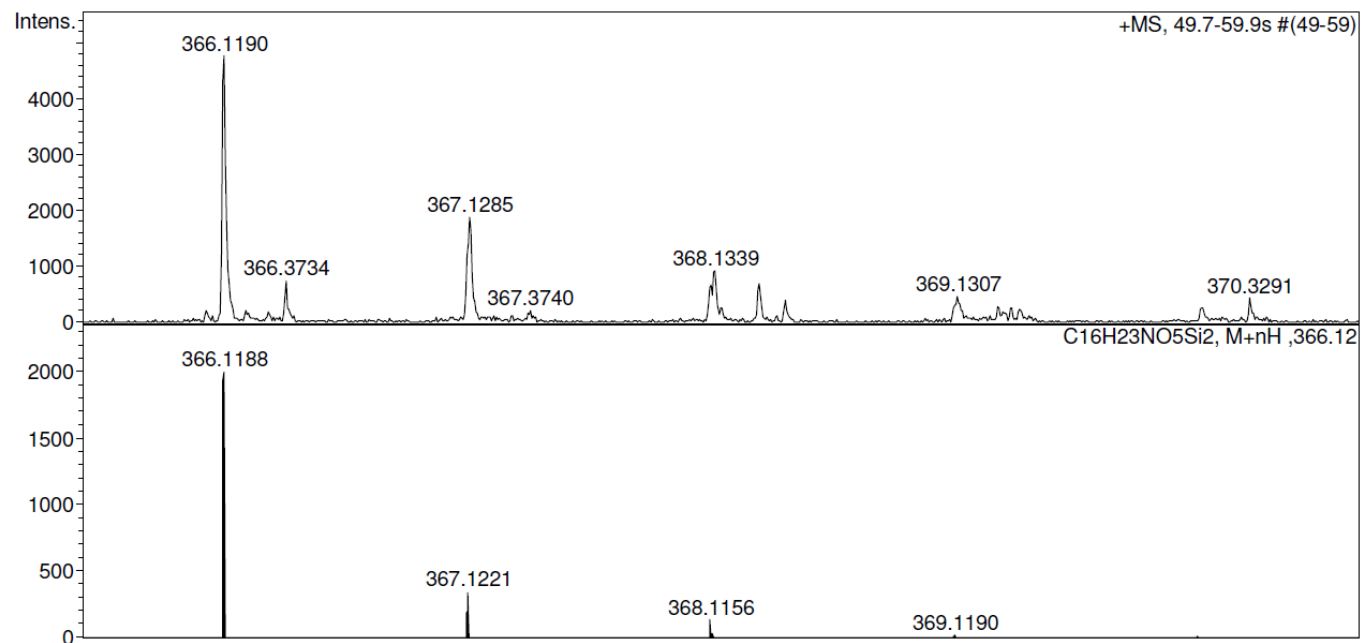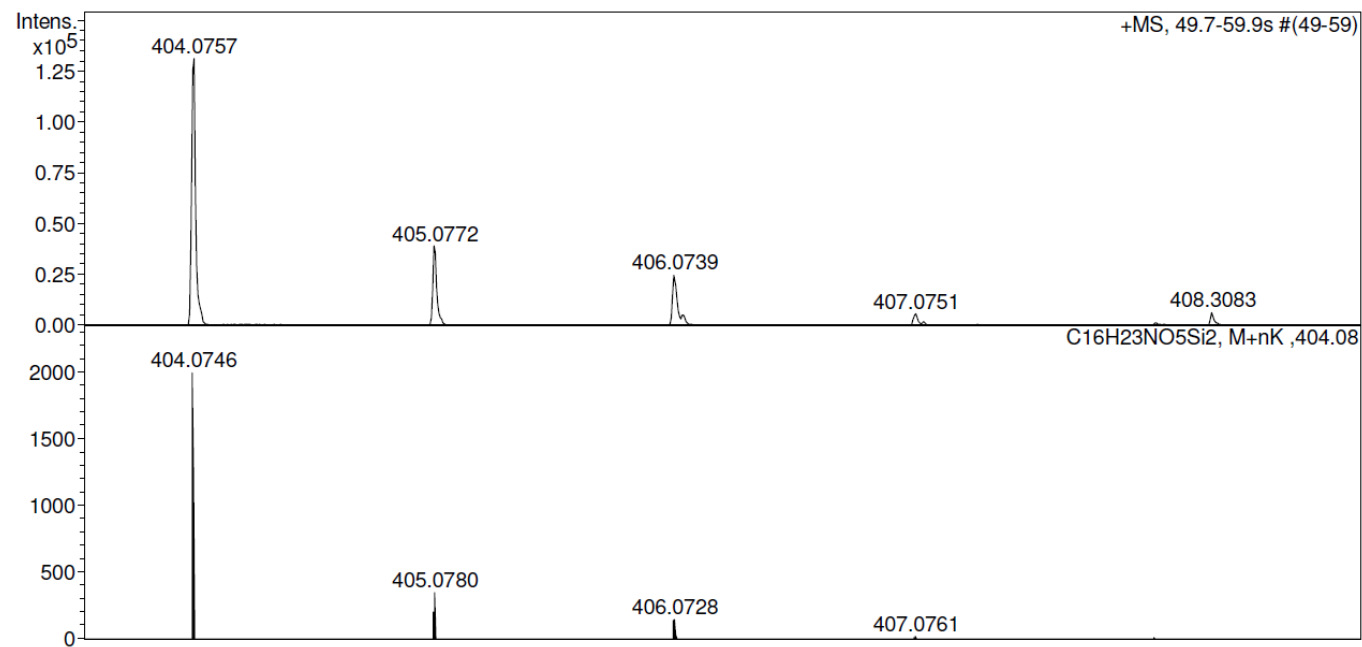

S67

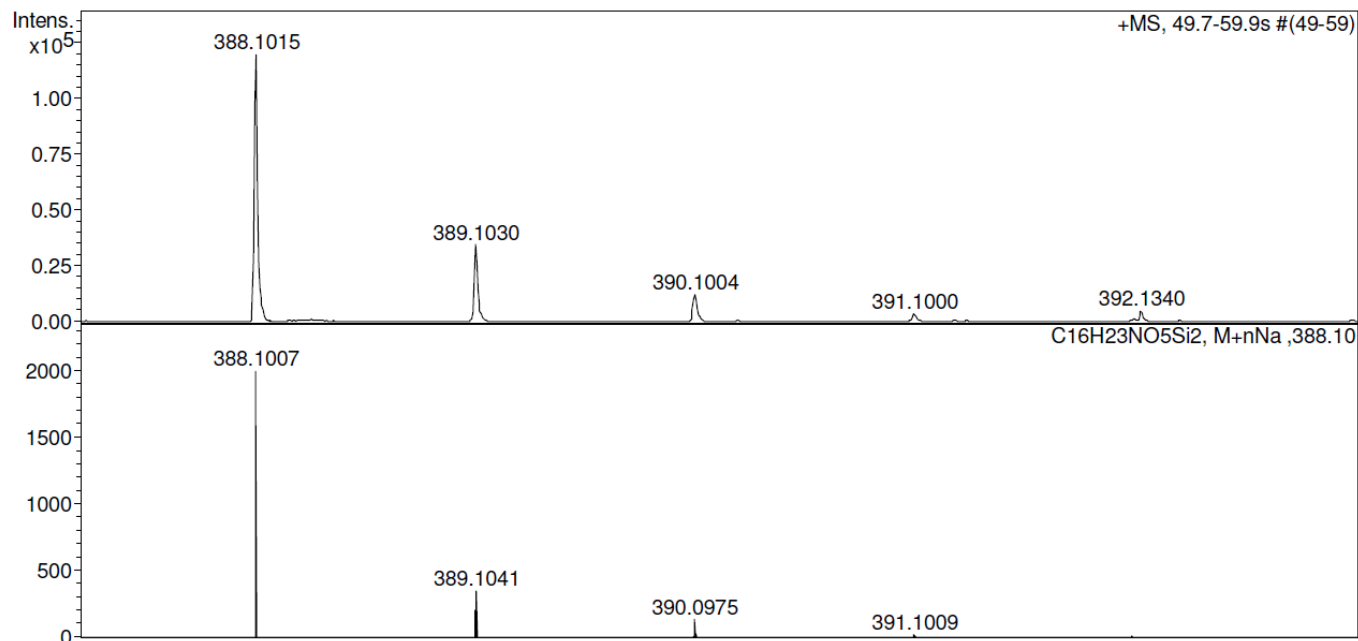

**Characterisation data for 1,3-dioxoisindolin-2-yl 4-(1,1,3,3,3-pentamethyldisiloxanyl)benzoate:**

<sup>1</sup>H NMR (400 MHz, acetone-d<sub>6</sub>):  $\delta$  = 8.15 (d, <sup>3</sup>J=11 Hz, 2H),  $\delta$  = 7.94 (m, 4H),  $\delta$  = 7.83 (d, <sup>3</sup>J=11 Hz, 2H),  $\delta$  = 0.36 (s, 6H),  $\delta$  = 0.09 (s, 9H). <sup>13</sup>C NMR (100 MHz, acetone-d<sub>6</sub>):  $\delta$  = 163.84, 162.76, 149.98, 136.16, 134.58, 129.96, 129.79, 126.54, 124.71, 2.04, 0.83. <sup>29</sup>Si NMR (80 MHz, acetone-d<sub>6</sub>):  $\delta$  = 9.71, -2.39. <sup>15</sup>N NMR (40 MHz, acetone-d<sub>6</sub>):  $\delta$  = 207.49. HRMS (ESI) m/z [M + H]<sup>+</sup>: calcd for [C<sub>20</sub>H<sub>23</sub>NO<sub>6</sub>Si<sub>2</sub> + H]<sup>+</sup>, 431.1215; found, 431.1474. IR (cm<sup>-1</sup>): 2959, 1768, 1741, 1601, 1467, 1362, 1252, 1187, 1089, 1034-1006, 877-607.

<sup>1</sup>H NMR

(400 MHz, acetone-d6)

S68

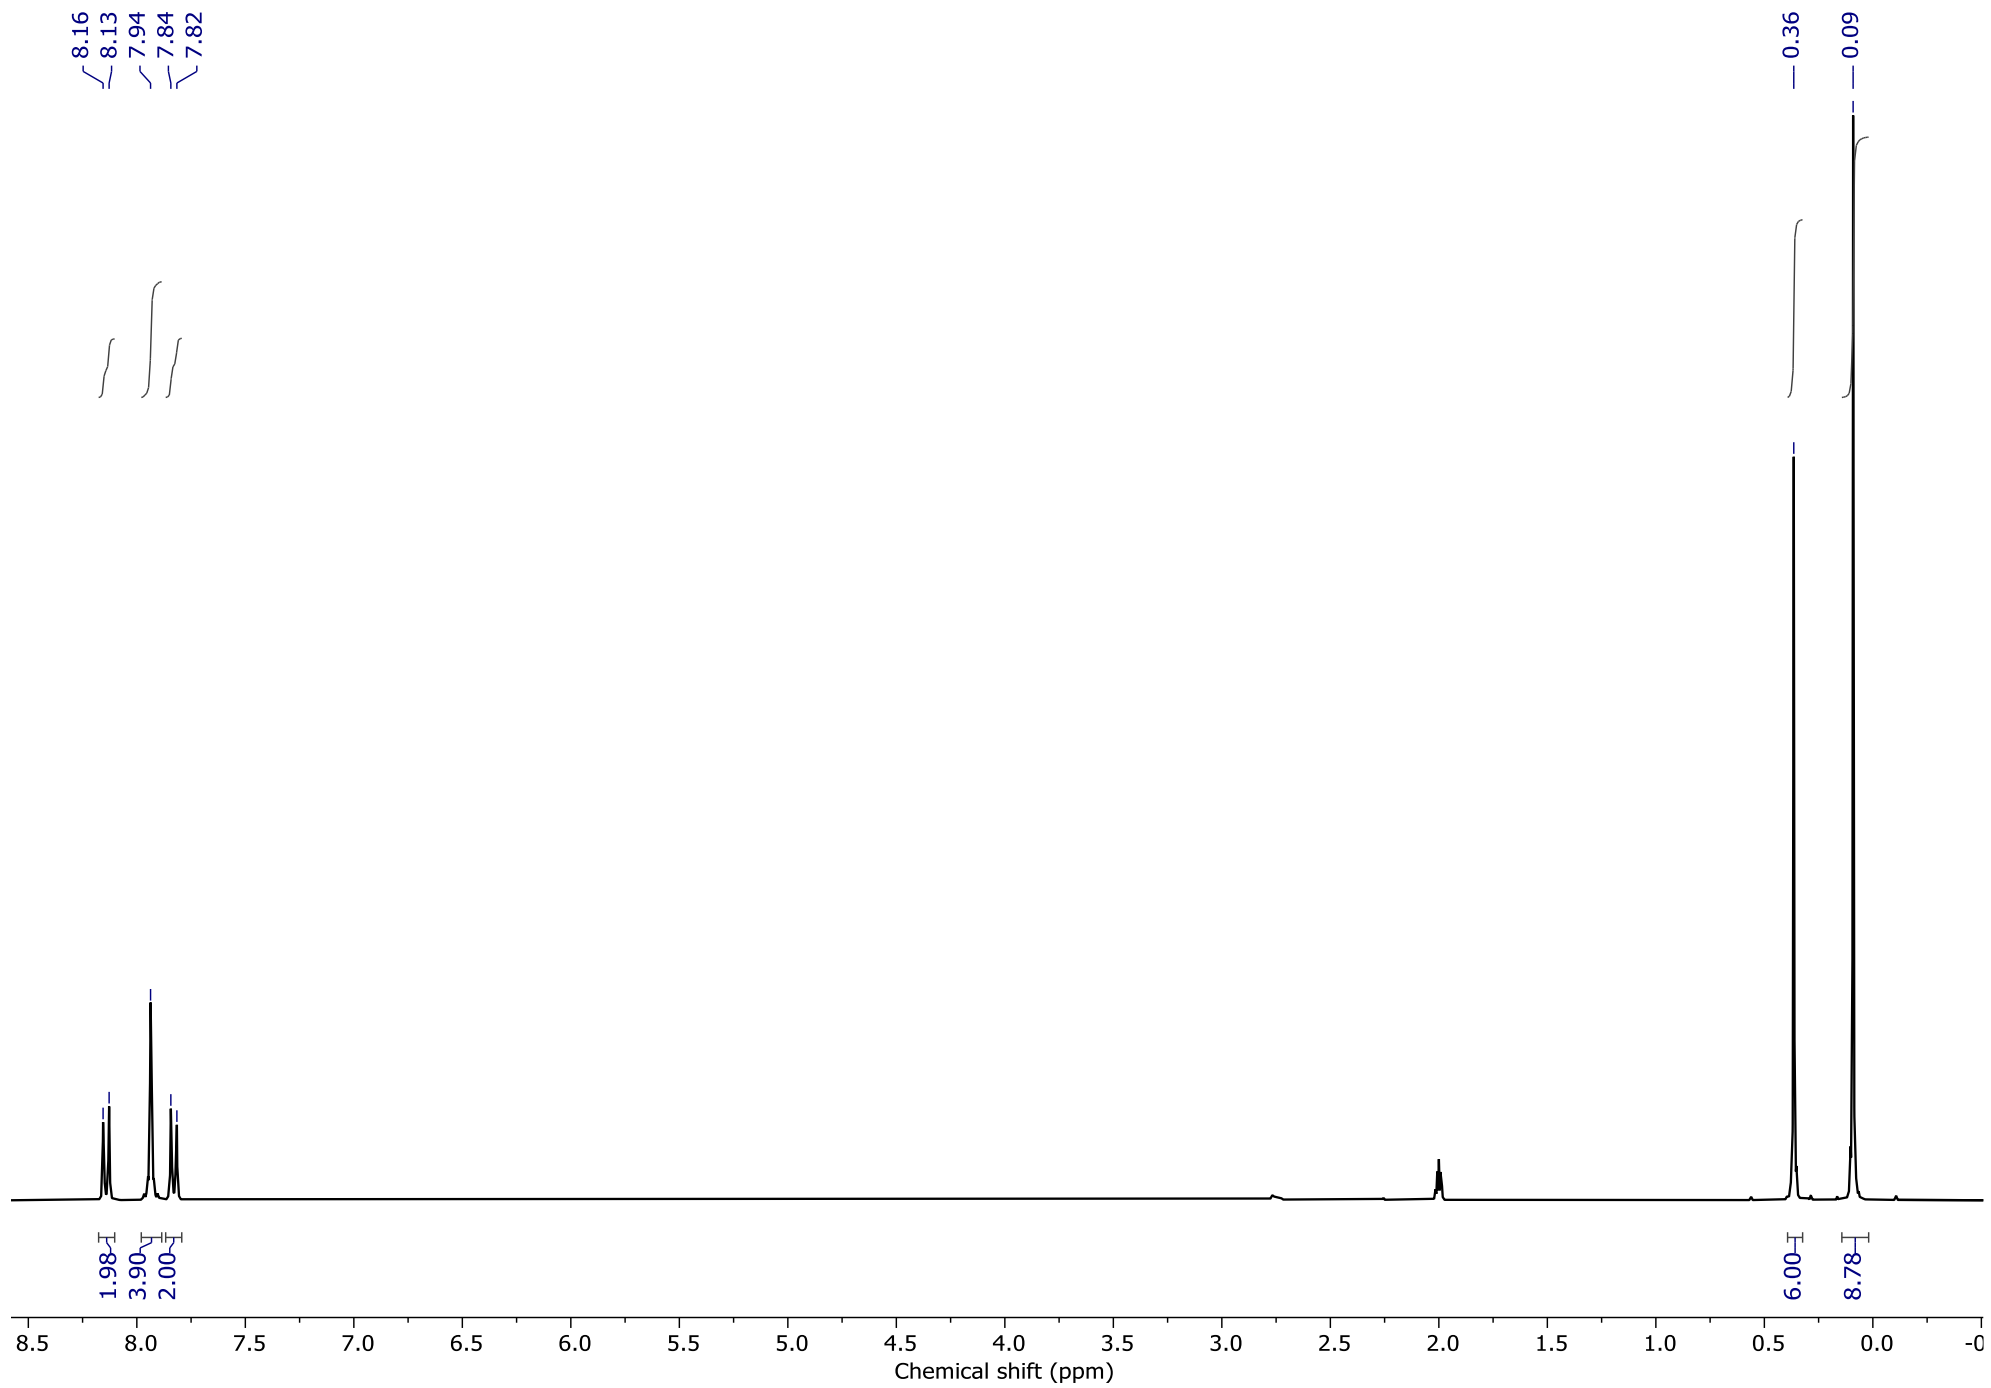

<sup>13</sup>C NMR

(100 MHz, acetone-d<sub>6</sub>)

S69

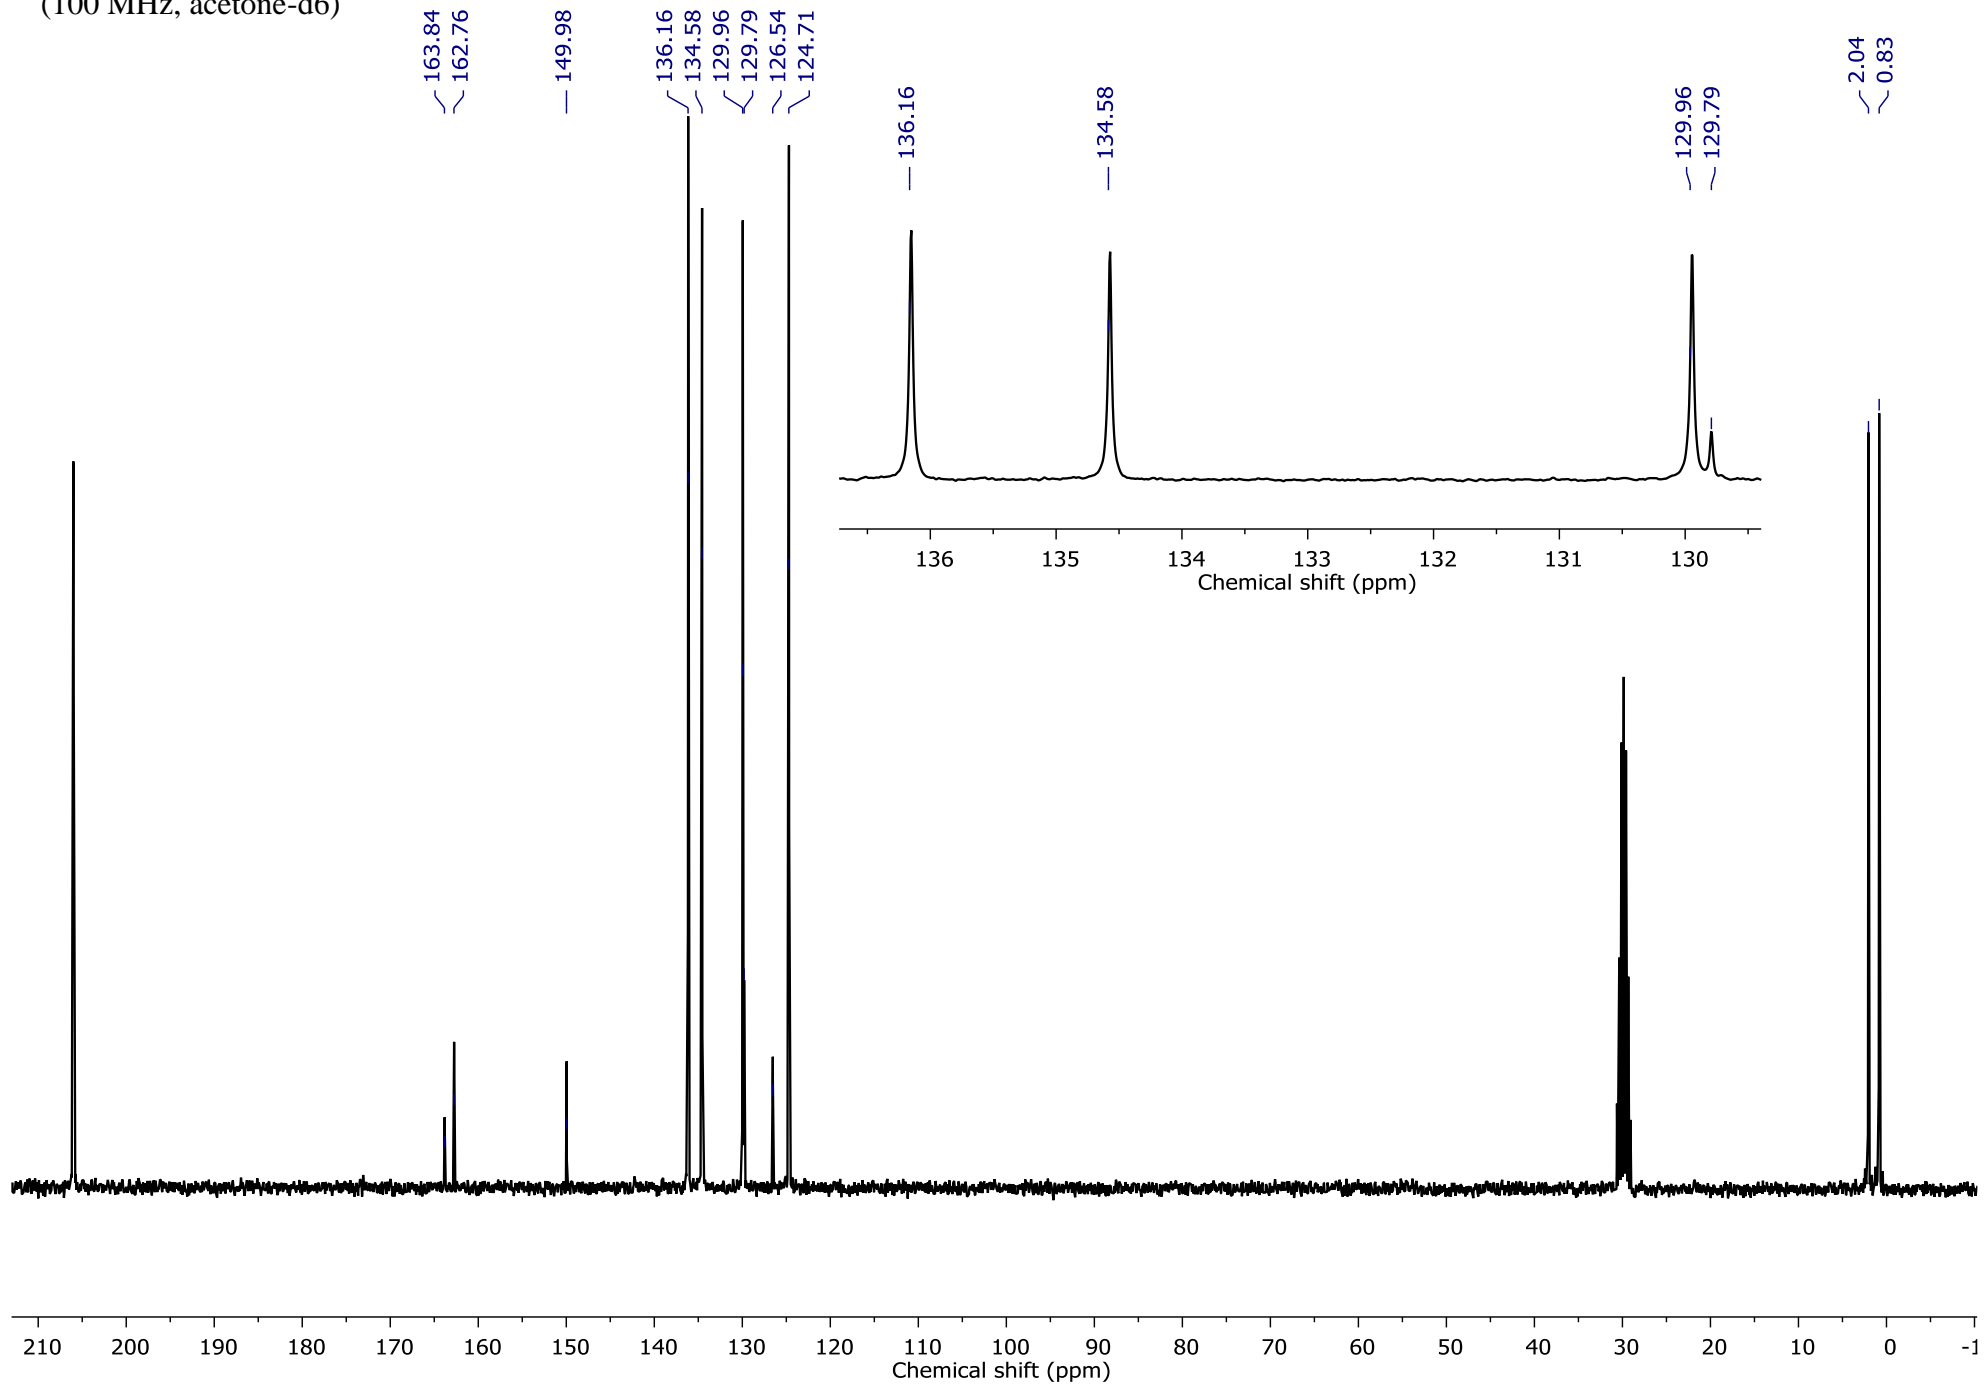

$^{29}\text{Si}$  NMR  
(80 MHz, acetone-d<sub>6</sub>)

S70

-9.71

-2.39

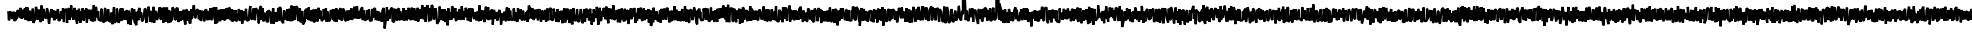

300

250

200

150

100

50

0

-50

-100

-150

-200

-250

-300

Chemical shift (ppm)

$^{15}\text{N}$  NMR  
(40 MHz, acetone- $d_6$ )

S71

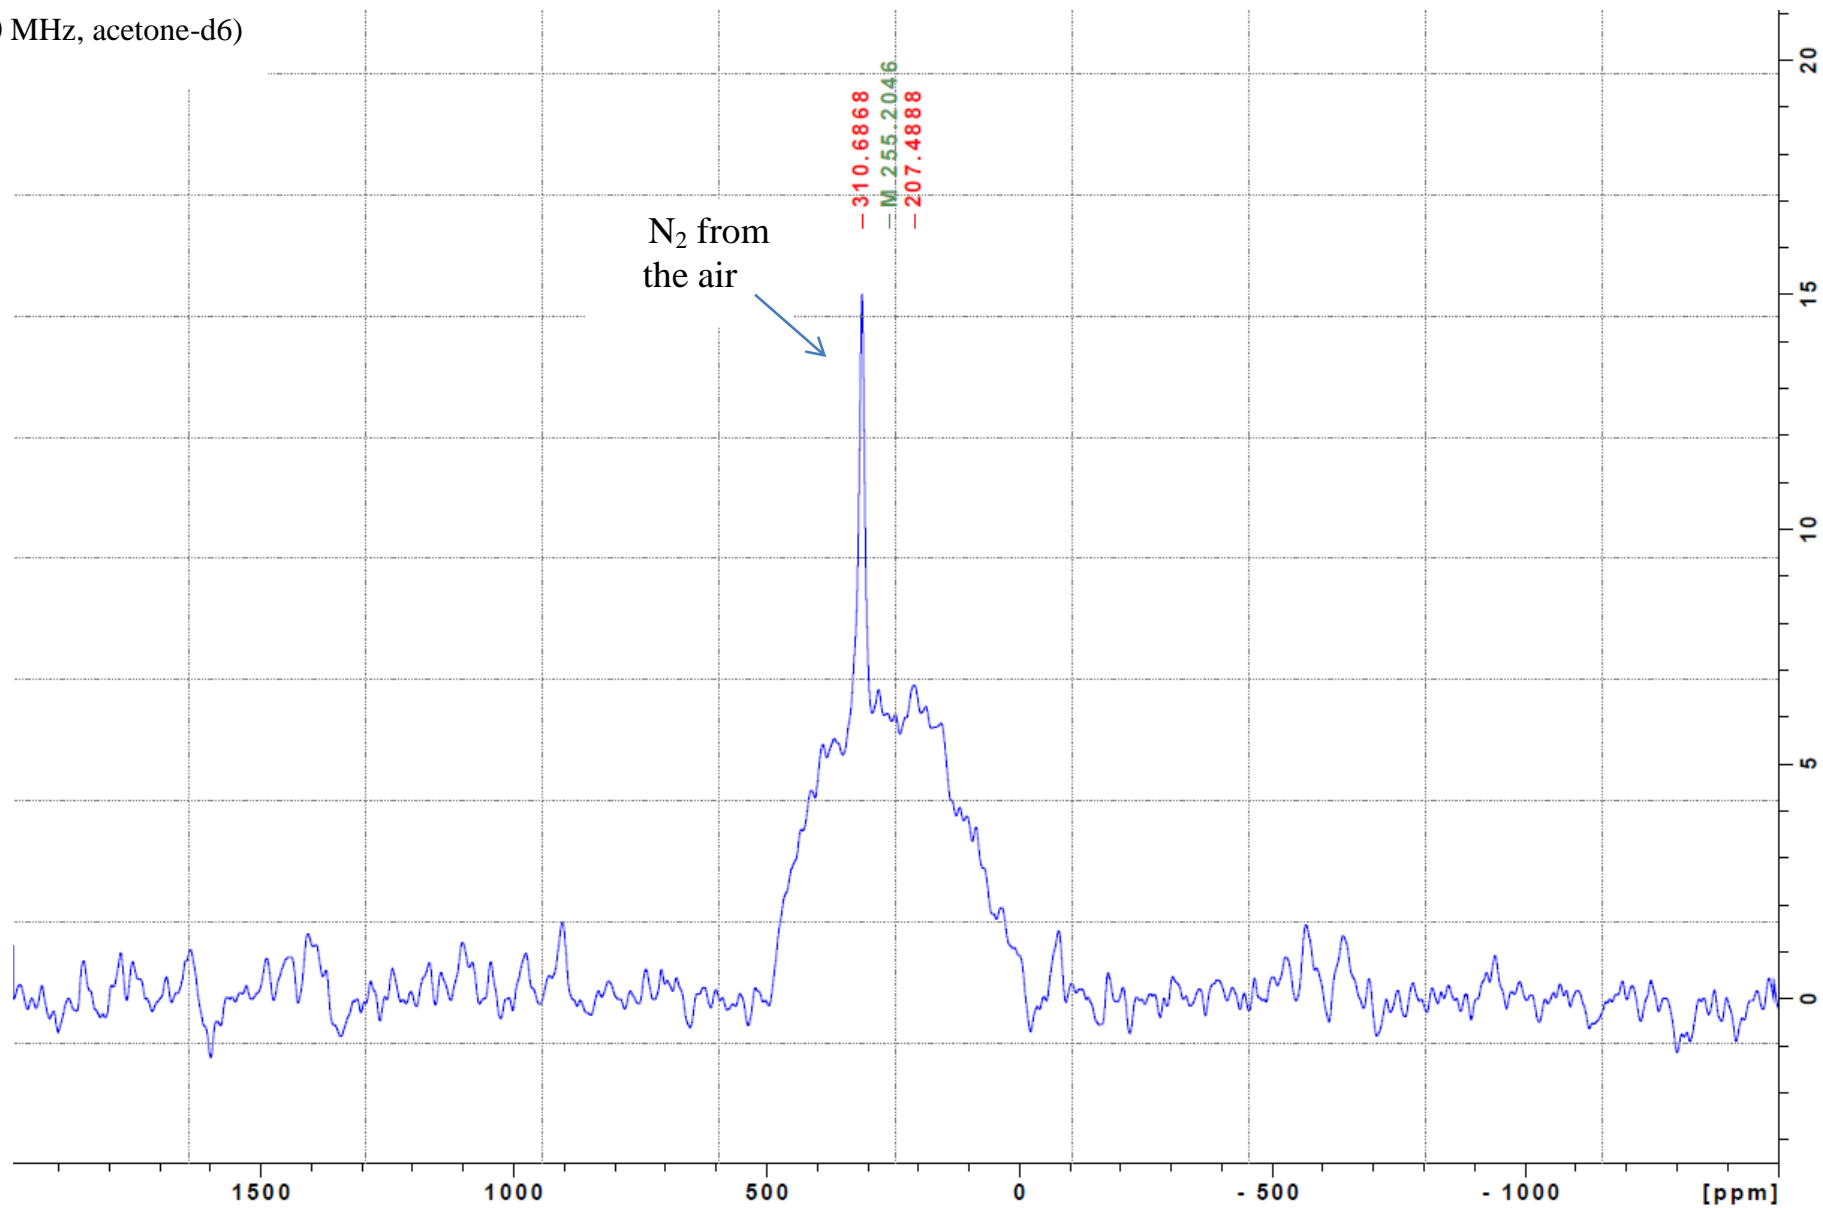

$^1\text{H} - ^{13}\text{C}$  HMBC  
(400 MHz, acetone- $d_6$ )

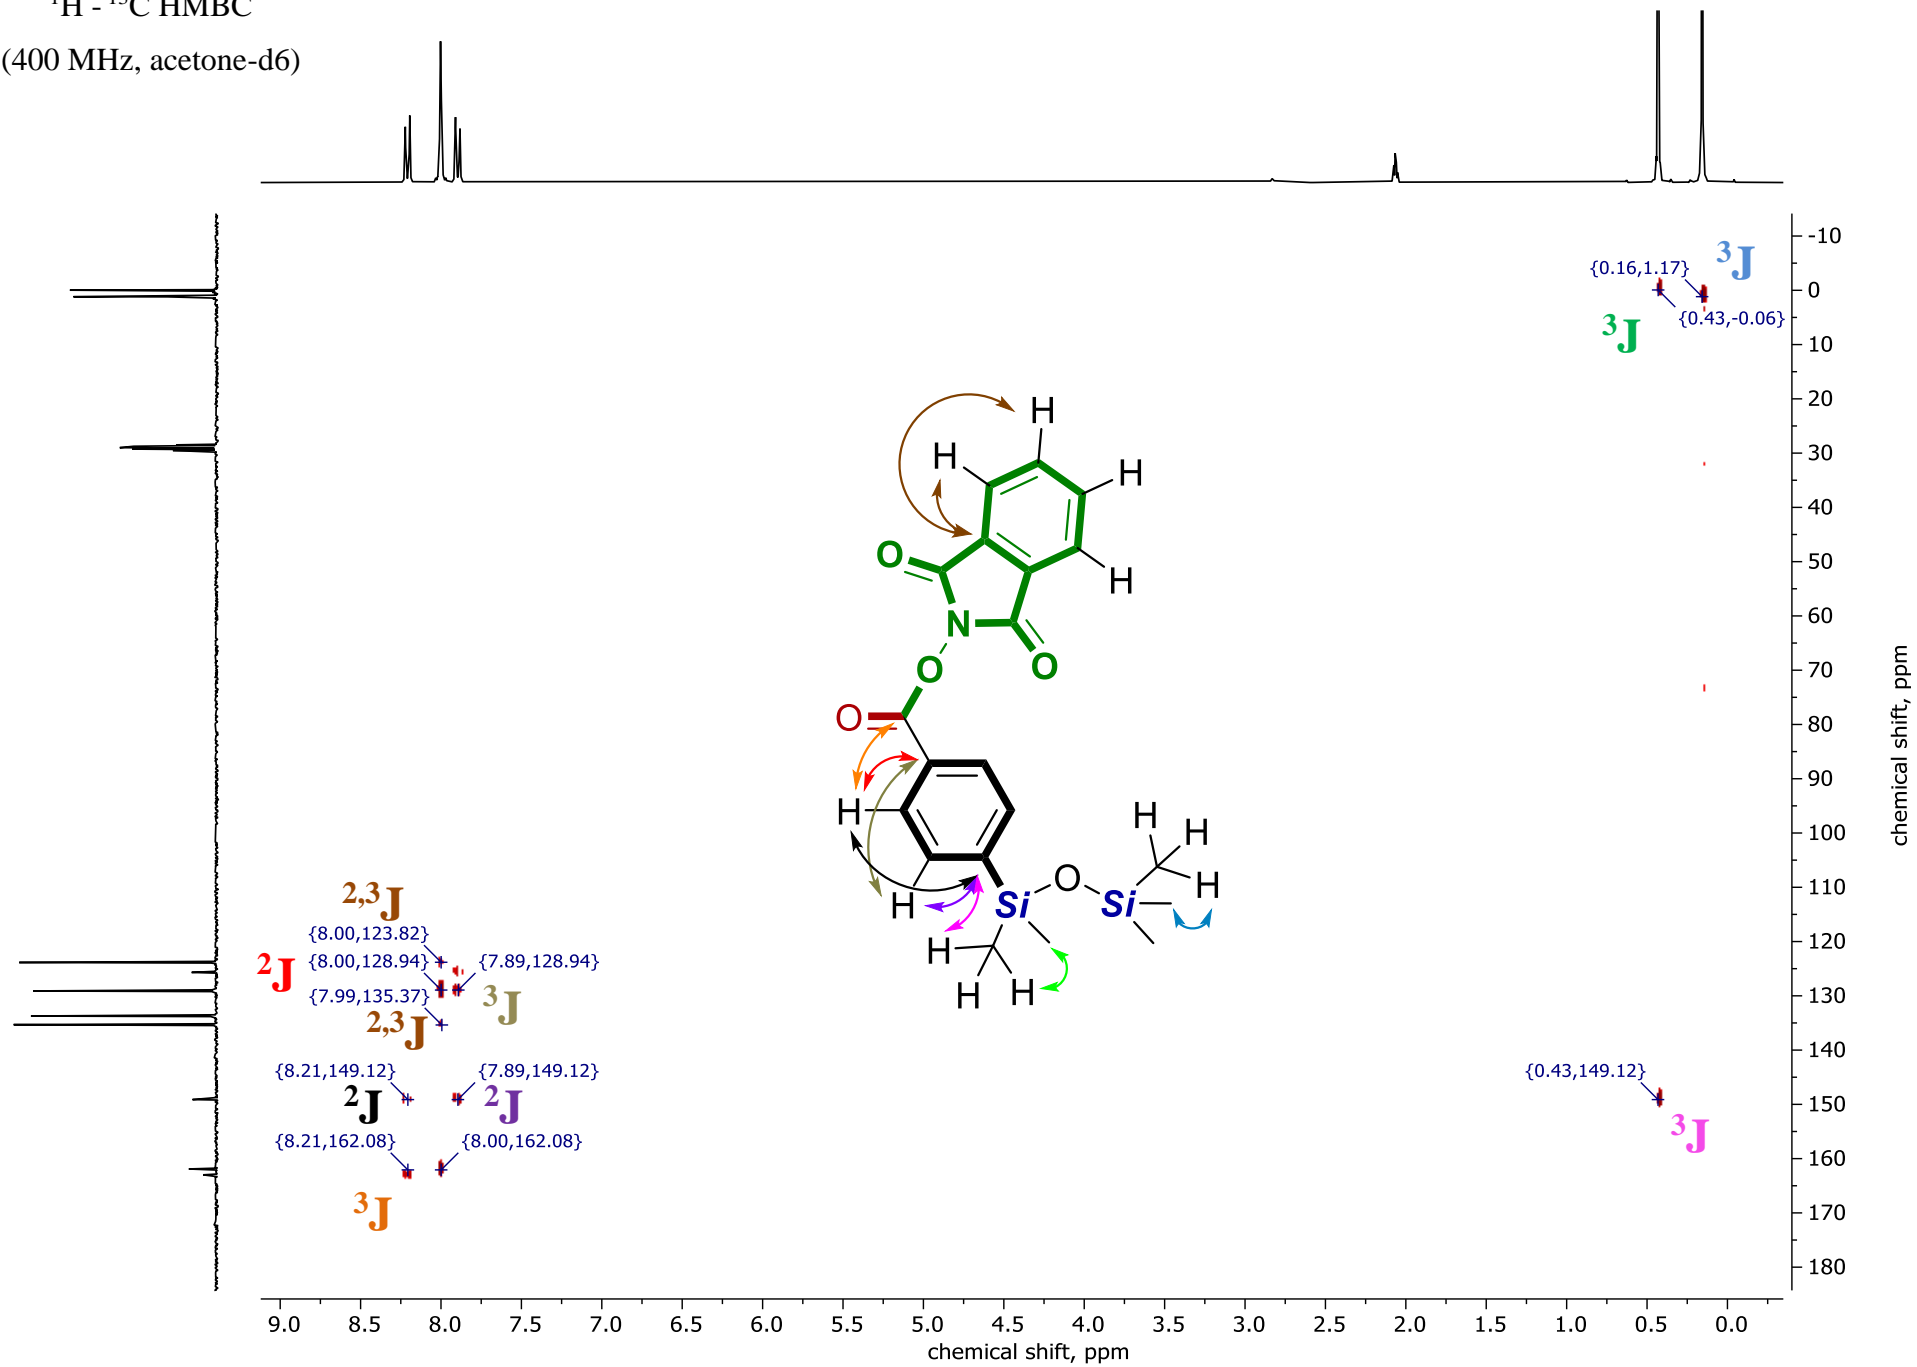



$^1\text{H} - ^{13}\text{C}$  HSQC

(400 MHz, acetone- $d_6$ )

S73

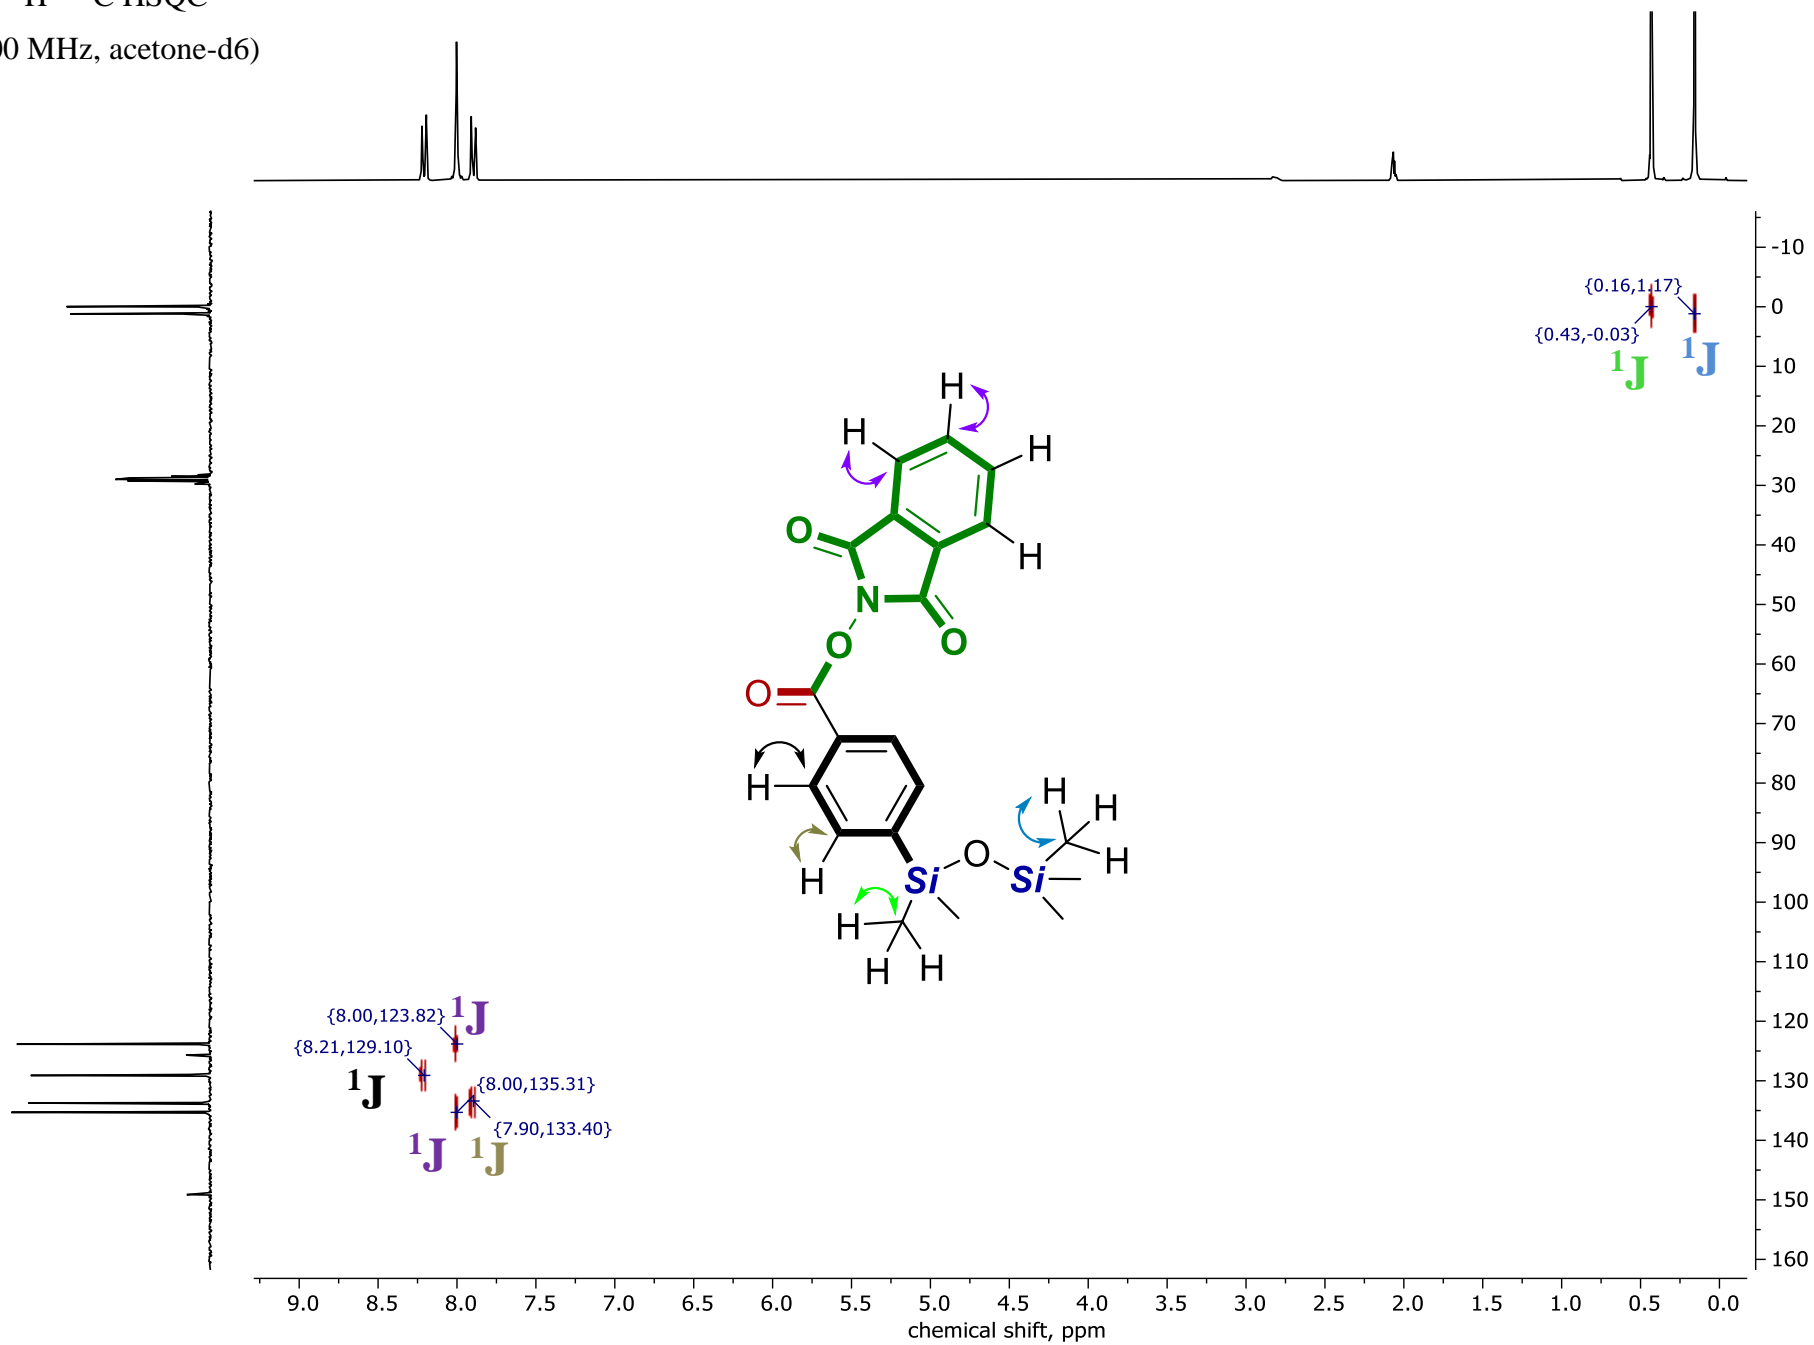

$^1\text{H} - ^{29}\text{Si}$  HMBC  
(400 MHz, acetone- $d_6$ )

S74

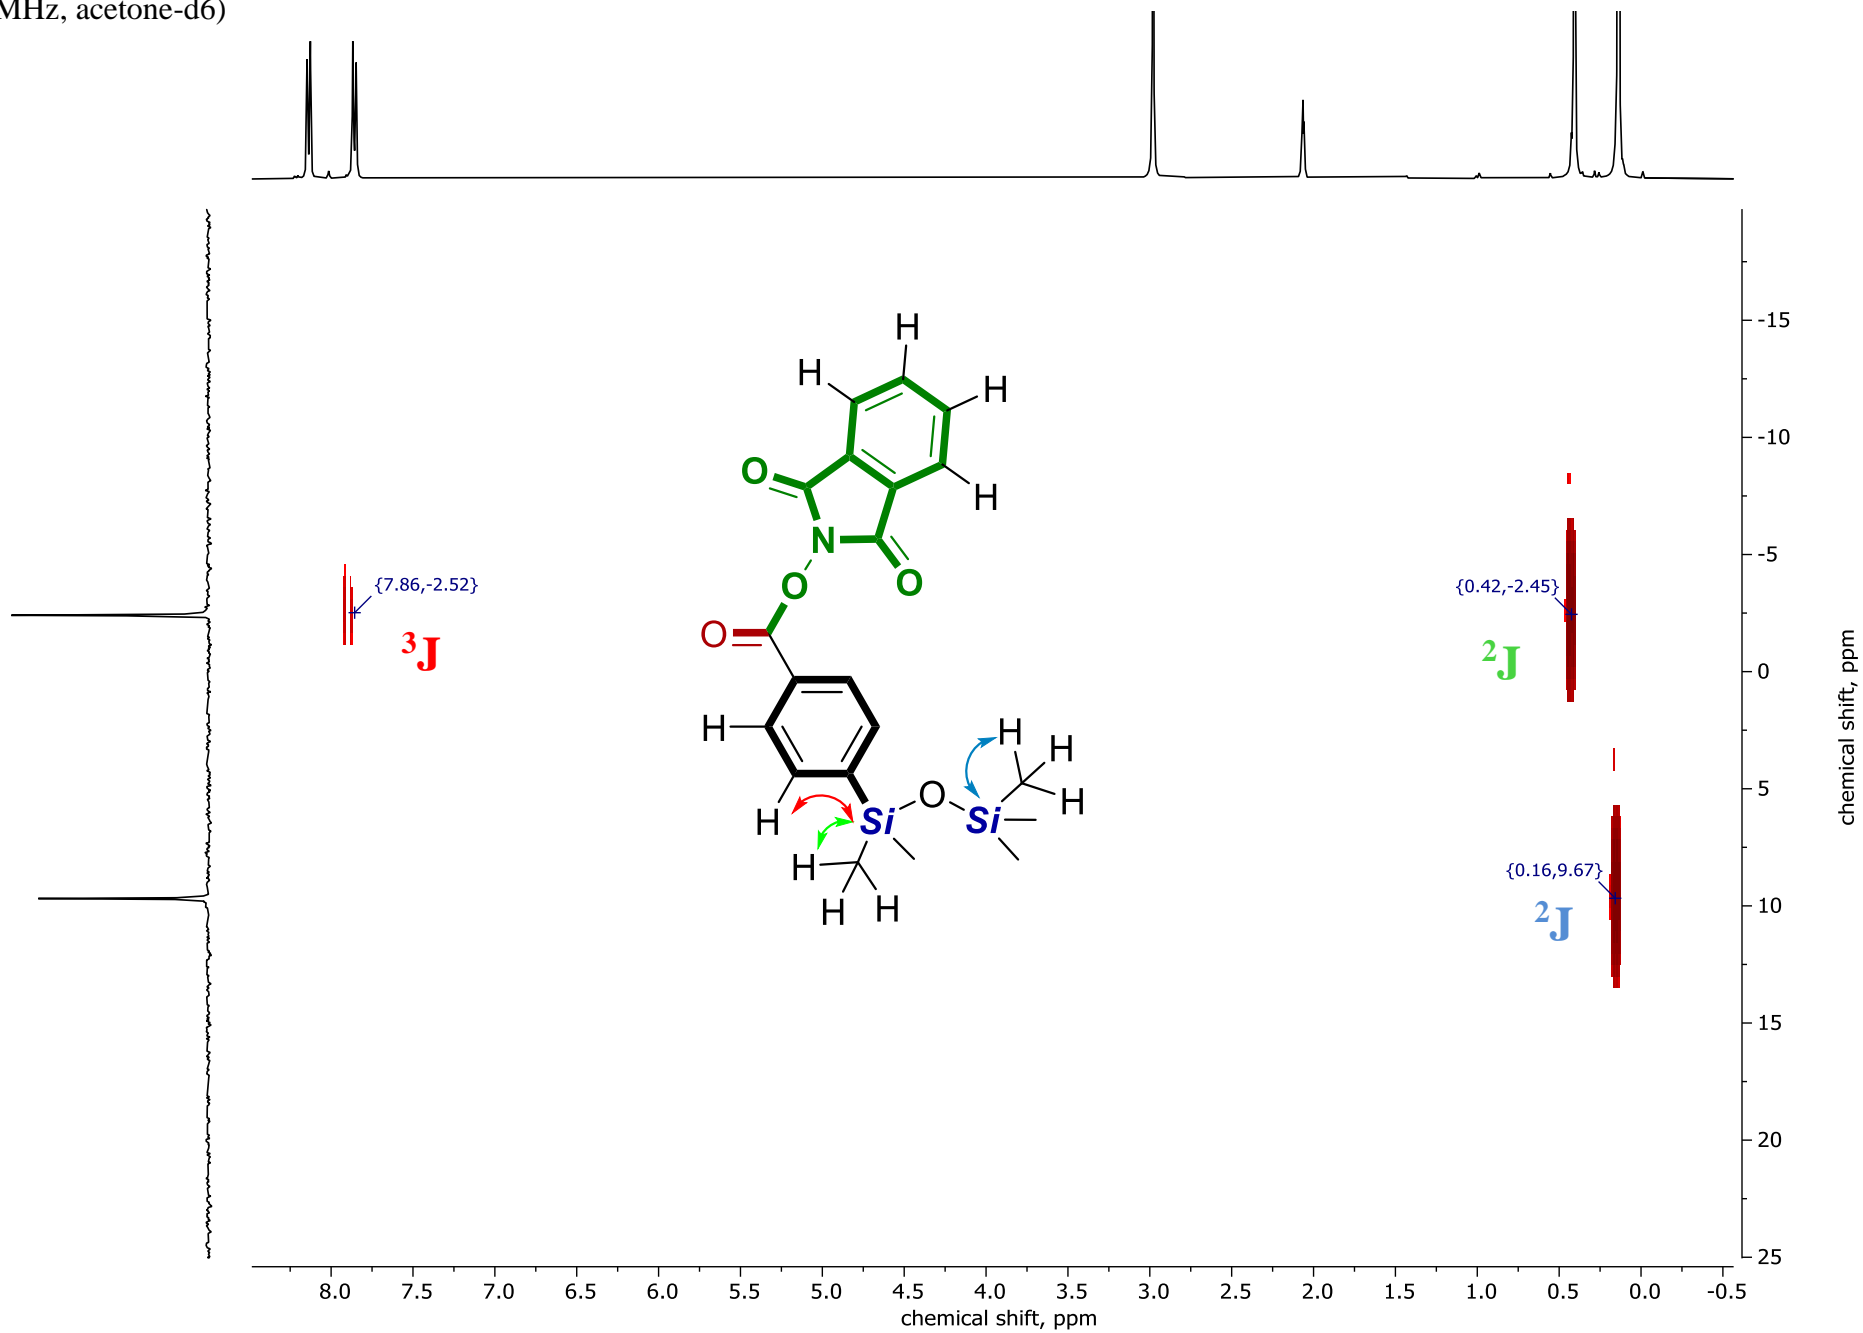

S75

IR spectrum

— 2959

— 1768  
— 1741

— 1601

— 1467

— 1362

— 1252

— 1187

— 1089

— 1034

— 1006

— 877

— 607

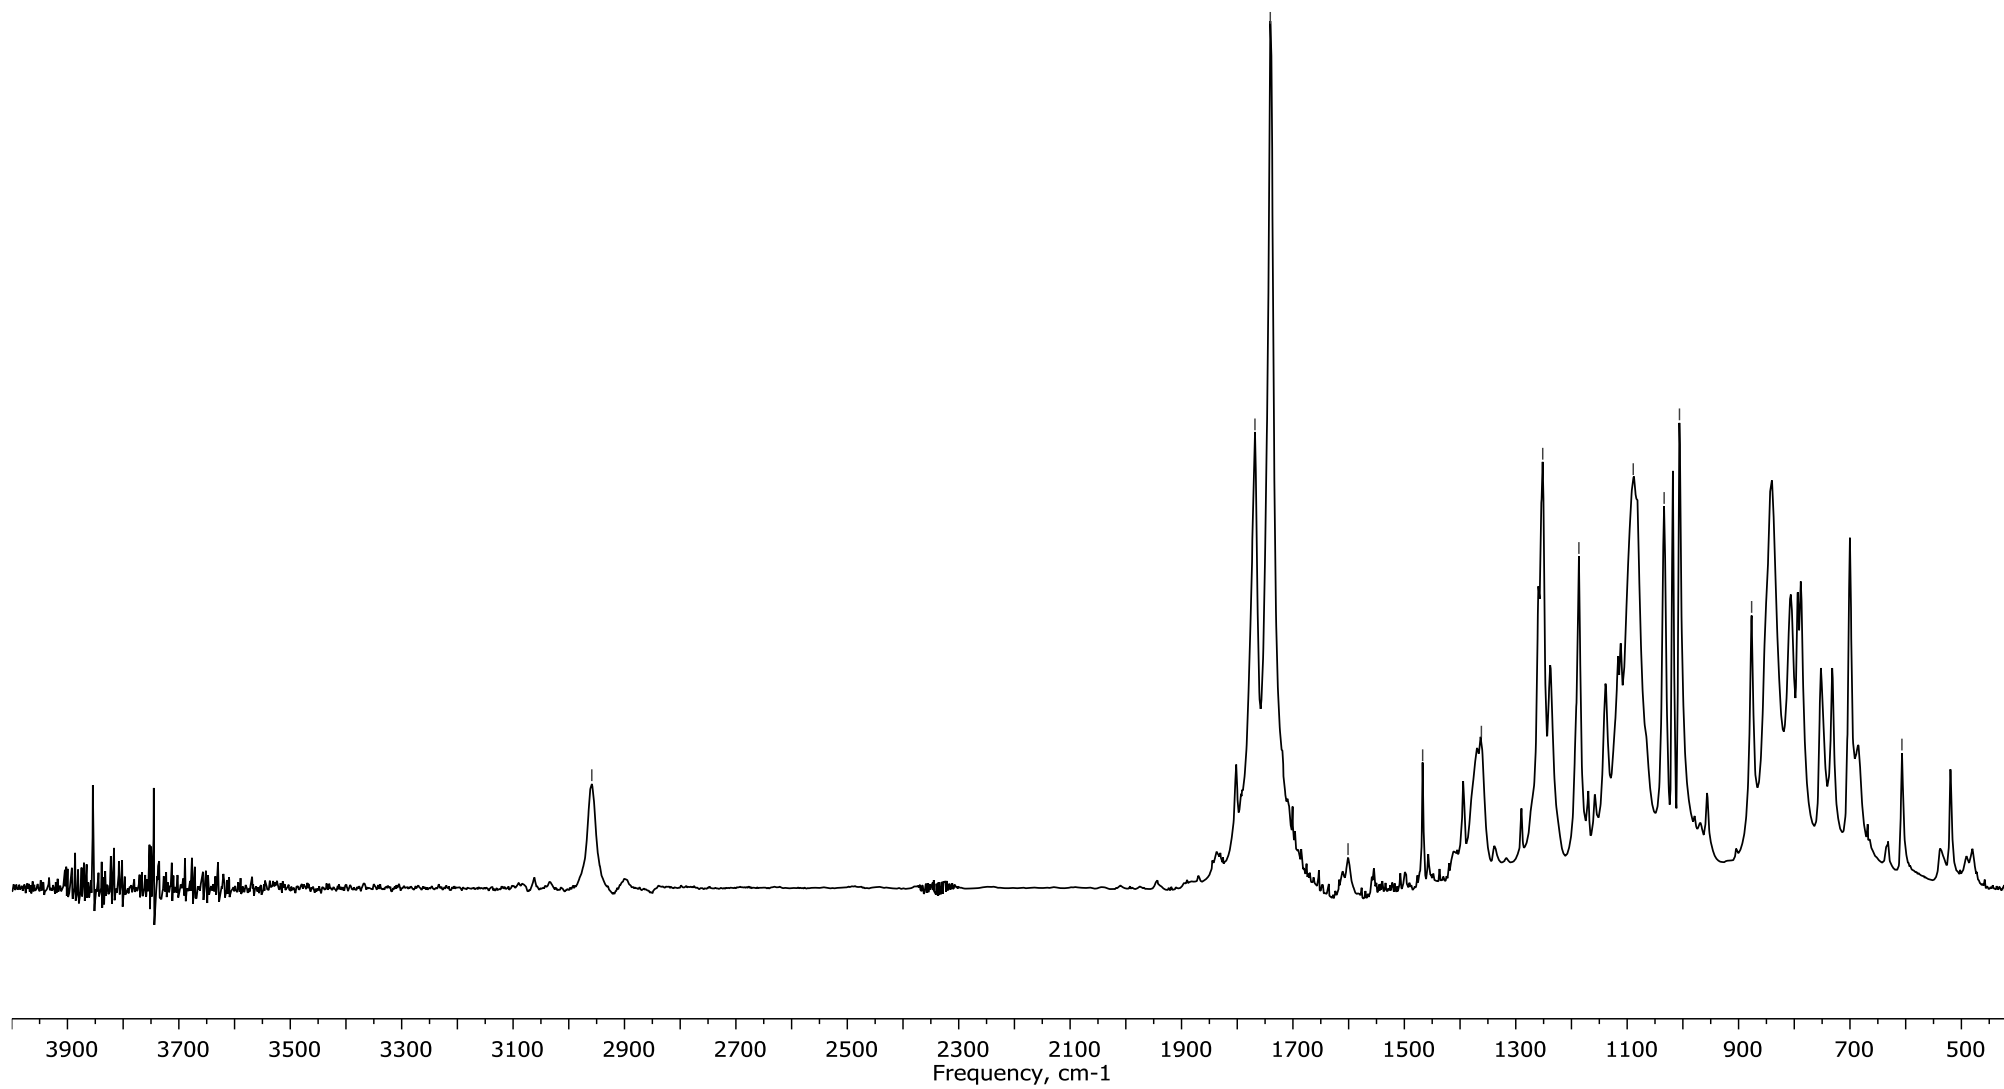

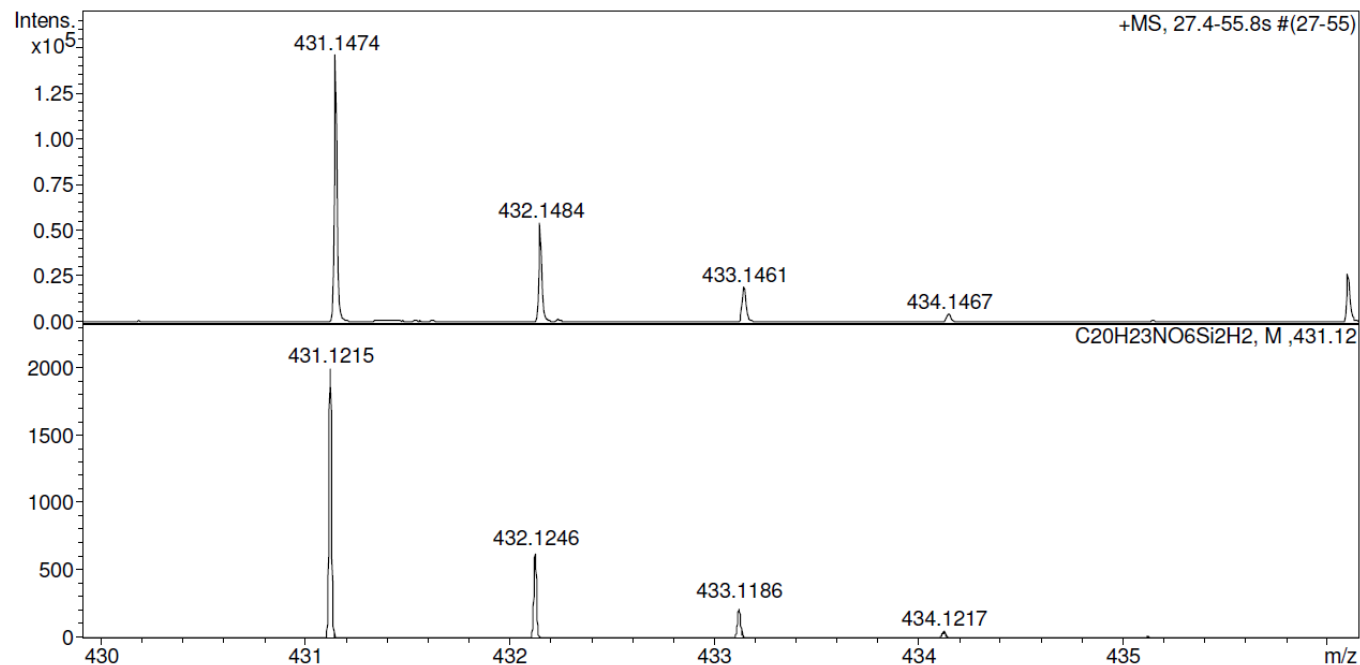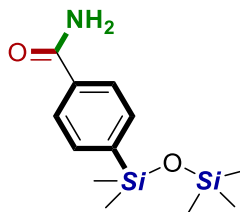

**Characterisation data for 4-(1,1,3,3,3-pentamethyldisiloxanyl)benzamide:**

<sup>1</sup>H NMR (400 MHz, DMSO-d<sub>6</sub>): δ = 8.00 (br s, 1H), δ = 7.87 (d, <sup>3</sup>J=8, 2H), δ = 7.59 (d, <sup>3</sup>J=8, 2H), δ = 7.41 (br s, 1H), δ = 0.31 (s, 6H), δ = 0.06 (s, 9H). <sup>13</sup>C NMR (100 MHz, DMSO-d<sub>6</sub>): δ = 167.94, 142.97, 135.10, 132.64, 126.67, 1.99, 0.74. <sup>29</sup>Si NMR (80 MHz, DMSO-d<sub>6</sub>): δ = 9.14, -2.08. <sup>15</sup>N NMR (40 MHz, DMSO-d<sub>6</sub>): δ = 103.05. IR (cm<sup>-1</sup>): 2958, 1653, 1610, 1547, 1405, 1251, 1067, 840-685.

<sup>1</sup>H NMR

(400 MHz, DMSO-d6)

S77

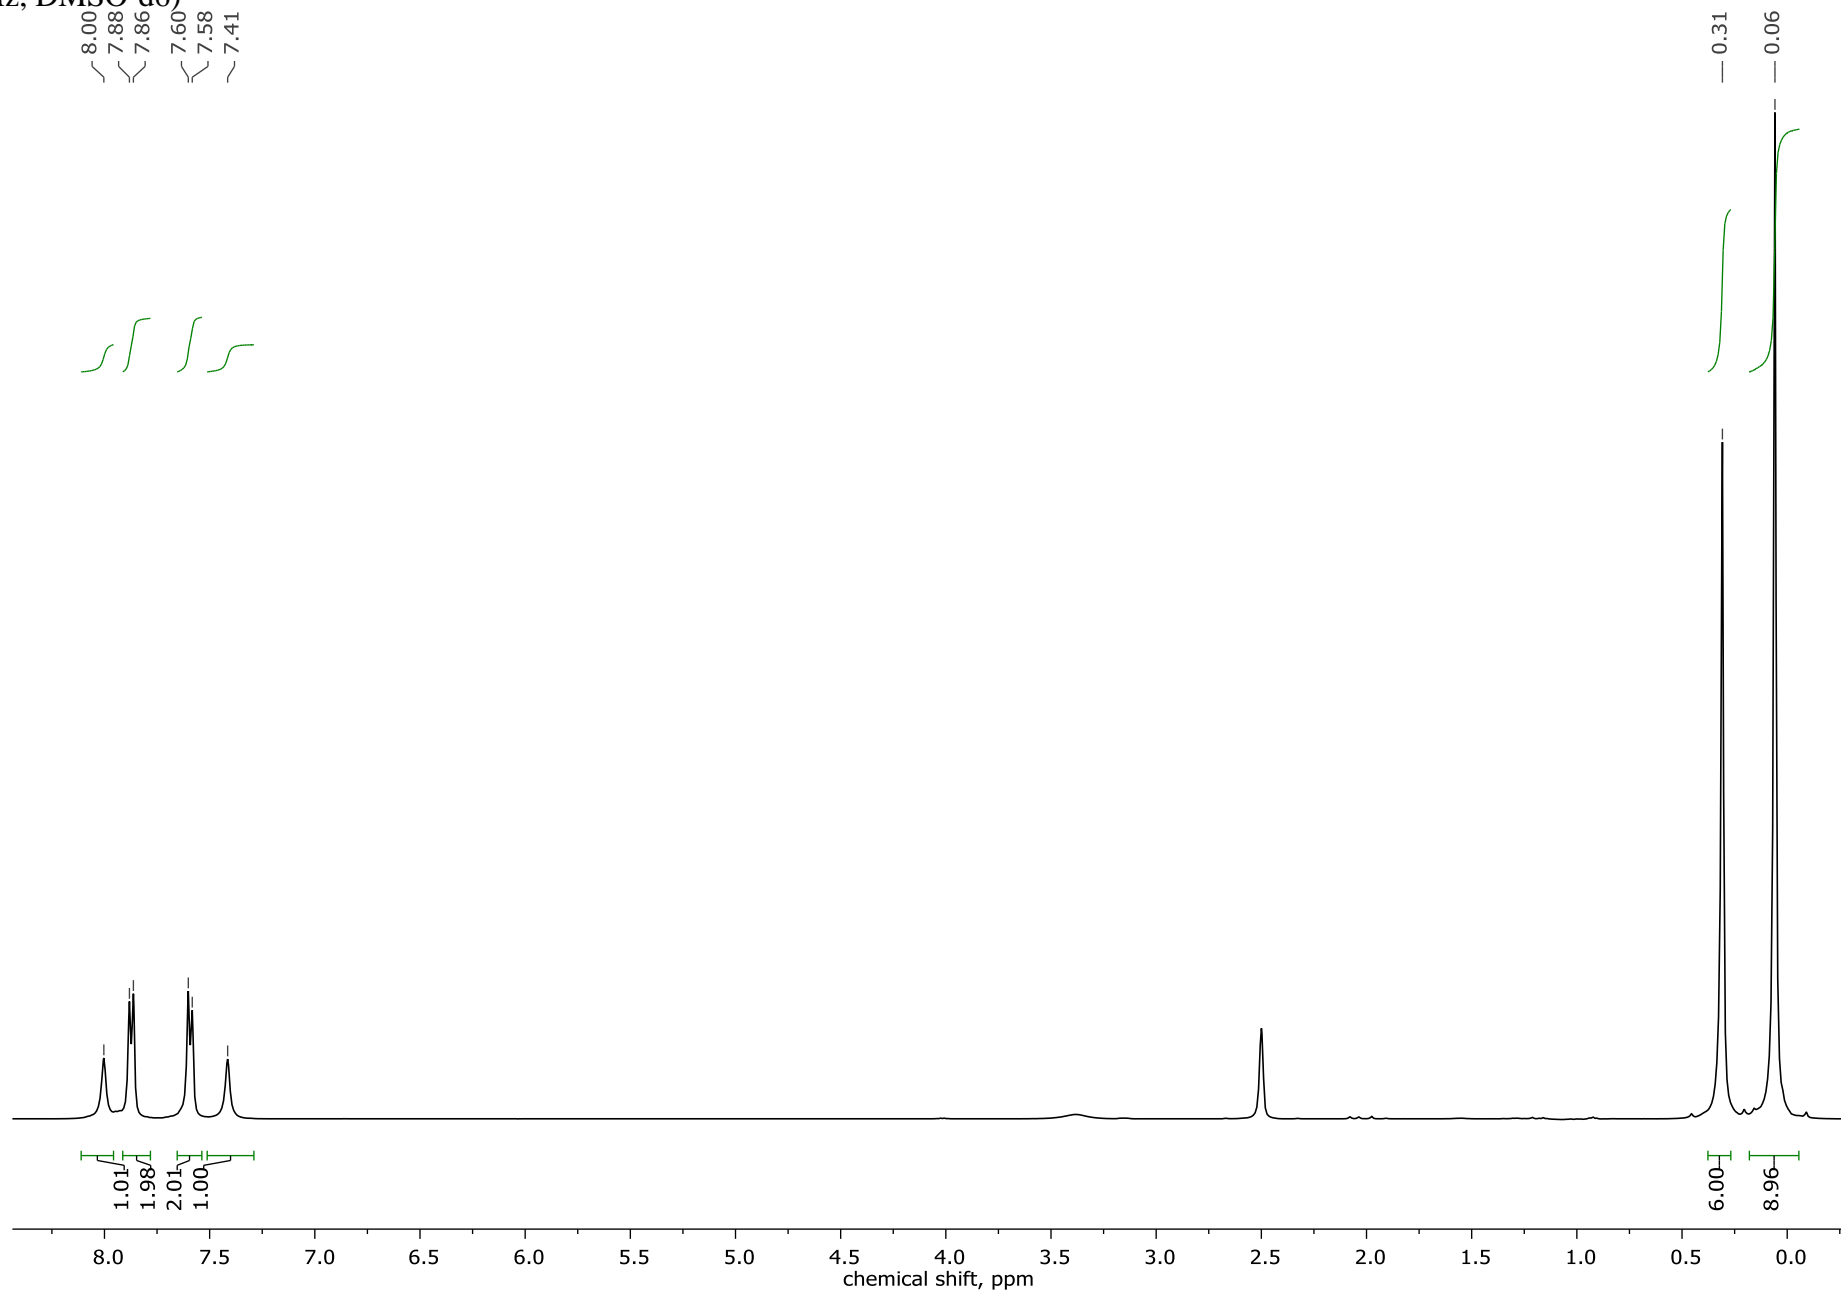

<sup>13</sup>C NMR

(100 MHz, DMSO-d6)

S78

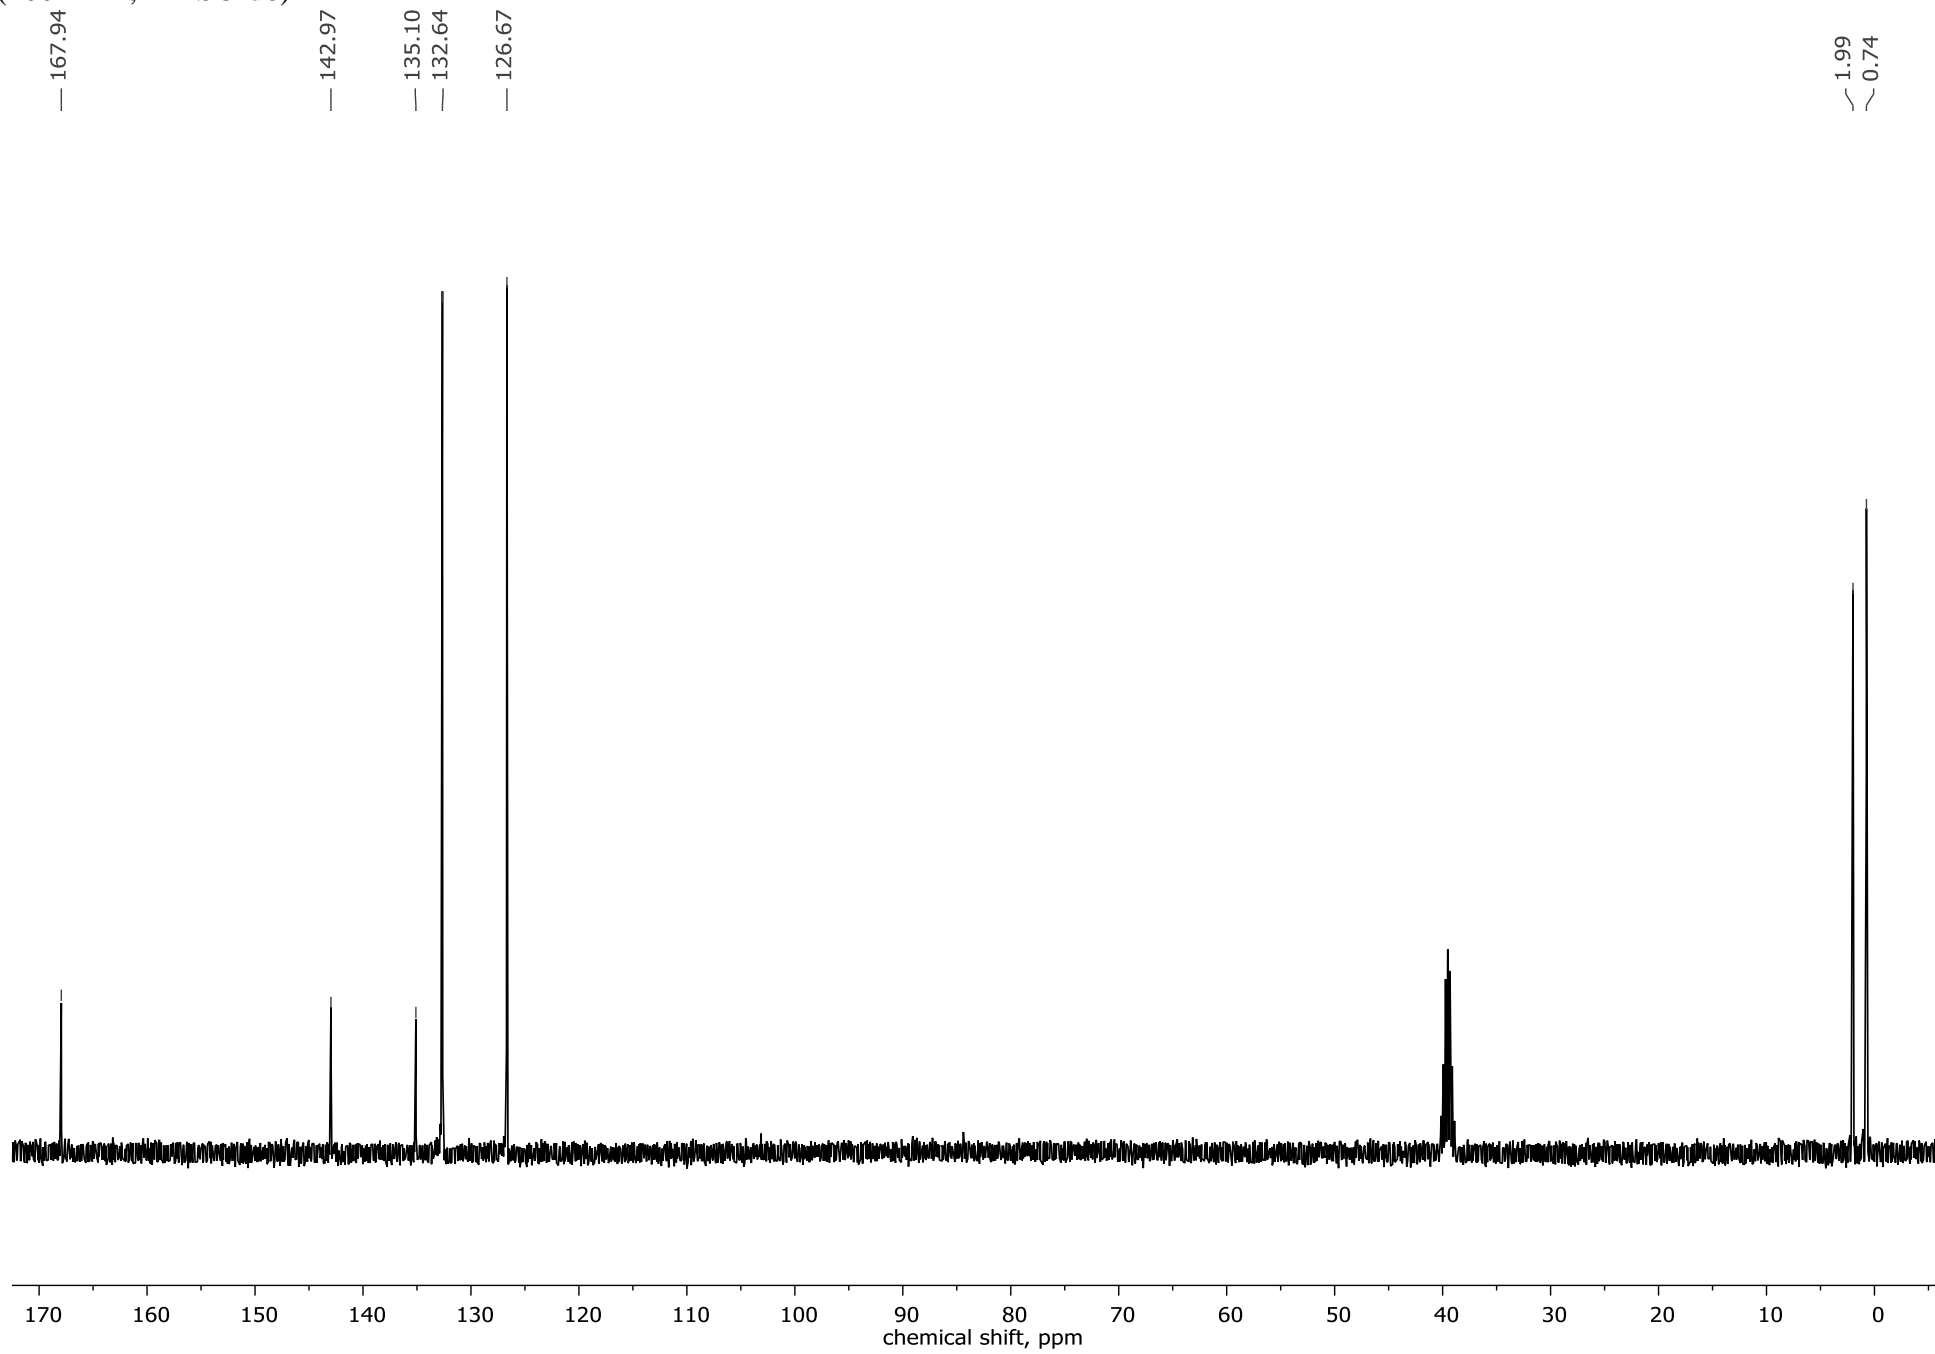

S79

$^{29}\text{Si}$  NMR  
(80 MHz, DMSO-d6)

— 9.14  
— -2.08

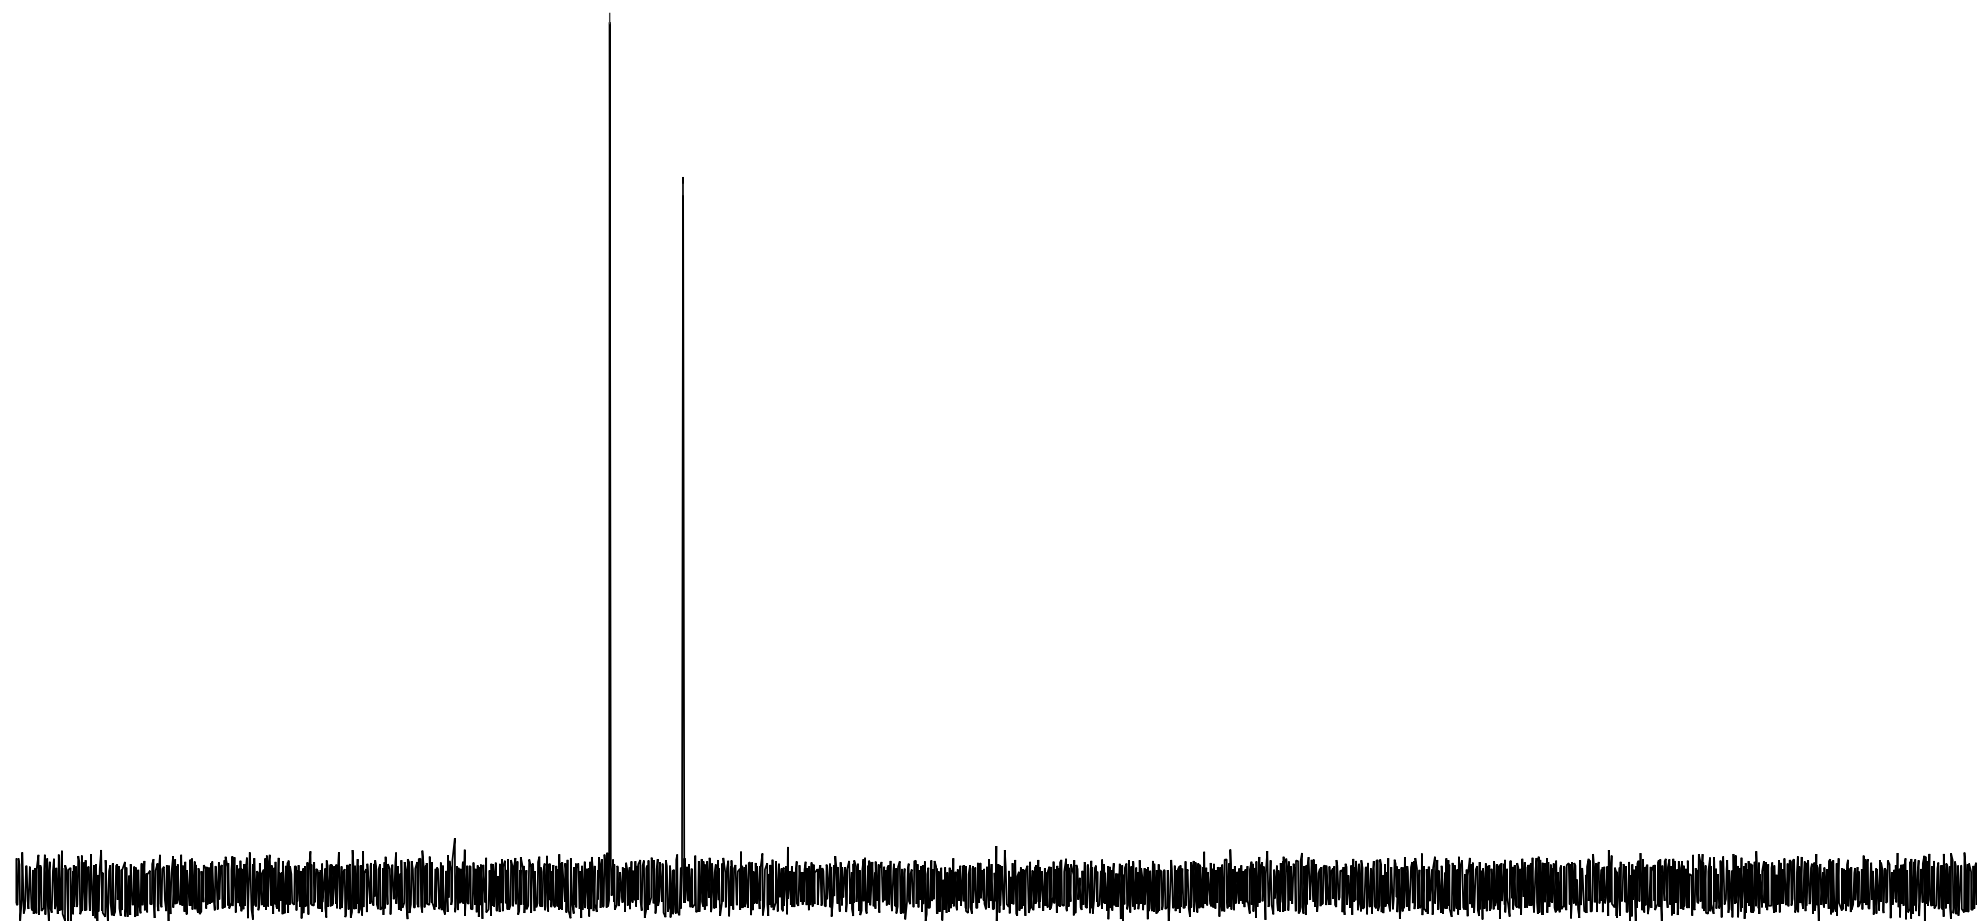

00 90 80 70 60 50 40 30 20 10 0 -10 -20 -30 -40 -50 -60 -70 -80 -90 -100 -110 -120 -130 -140 -150 -160 -170 -180 -190 -2

15N NMR  
(40 MHz, DMSO-d6)

S80

— 103.05

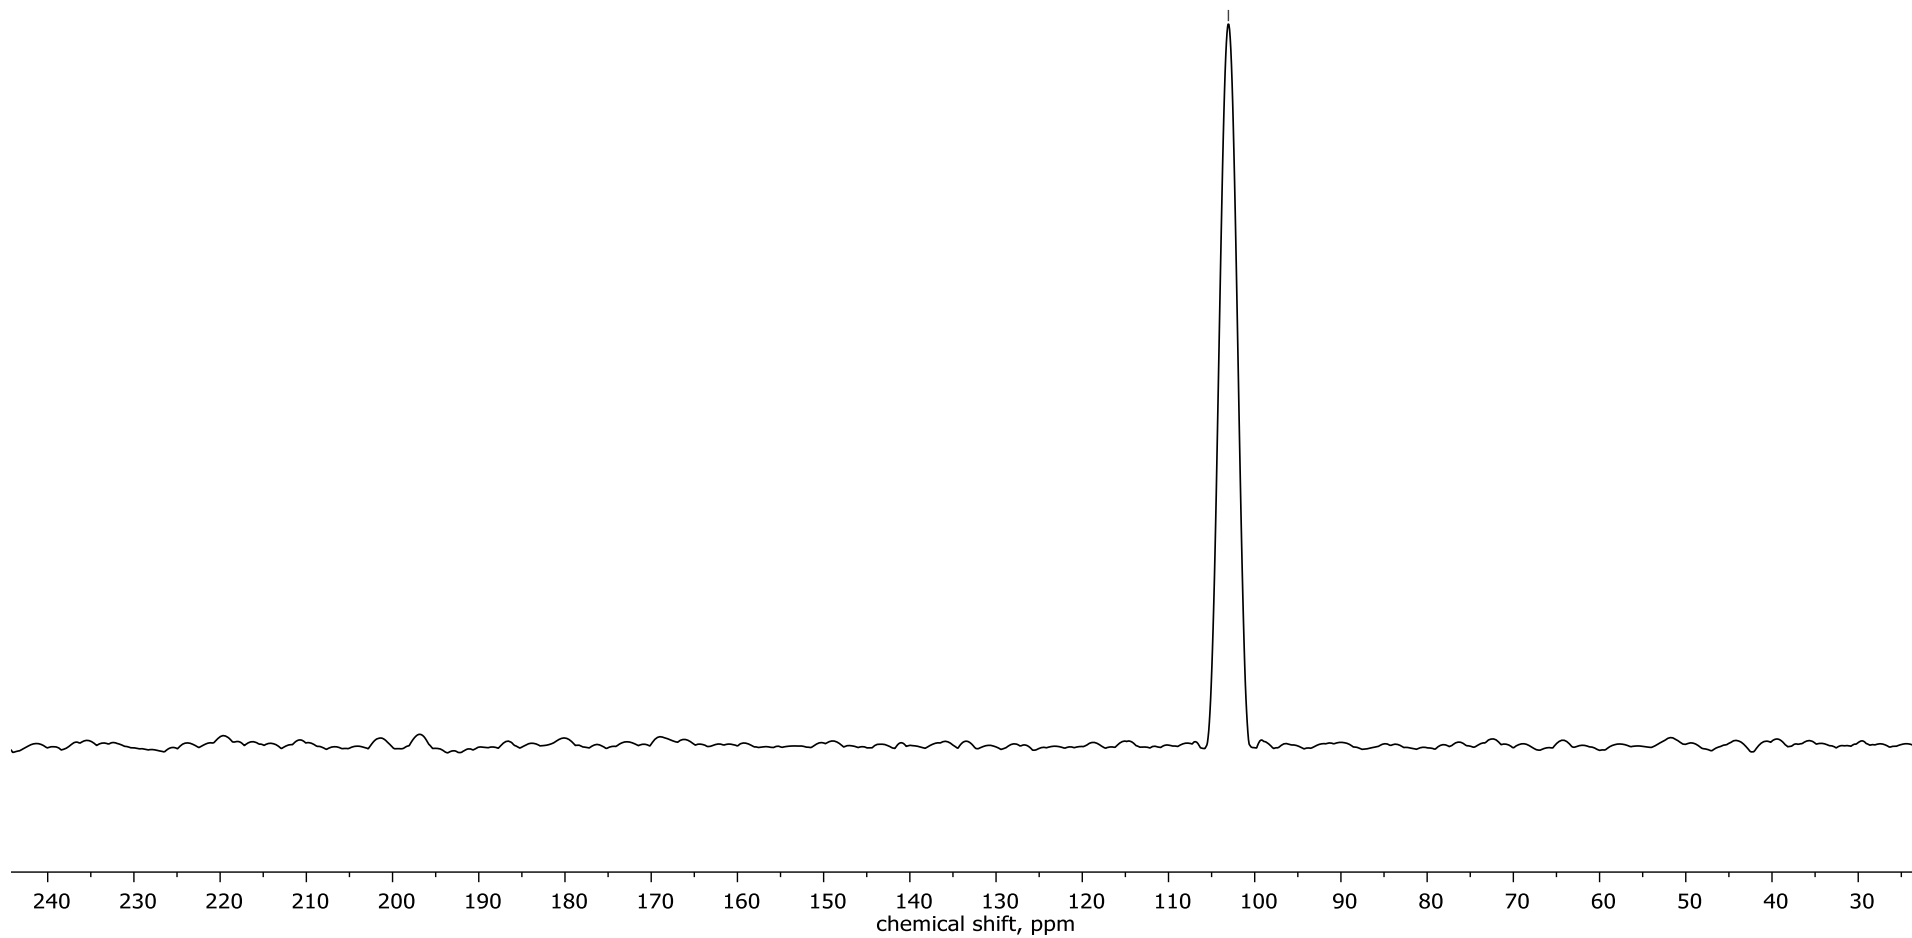



$^1\text{H} - ^{13}\text{C}$  HMBC

S81

(400 MHz, DMSO-d<sub>6</sub>)

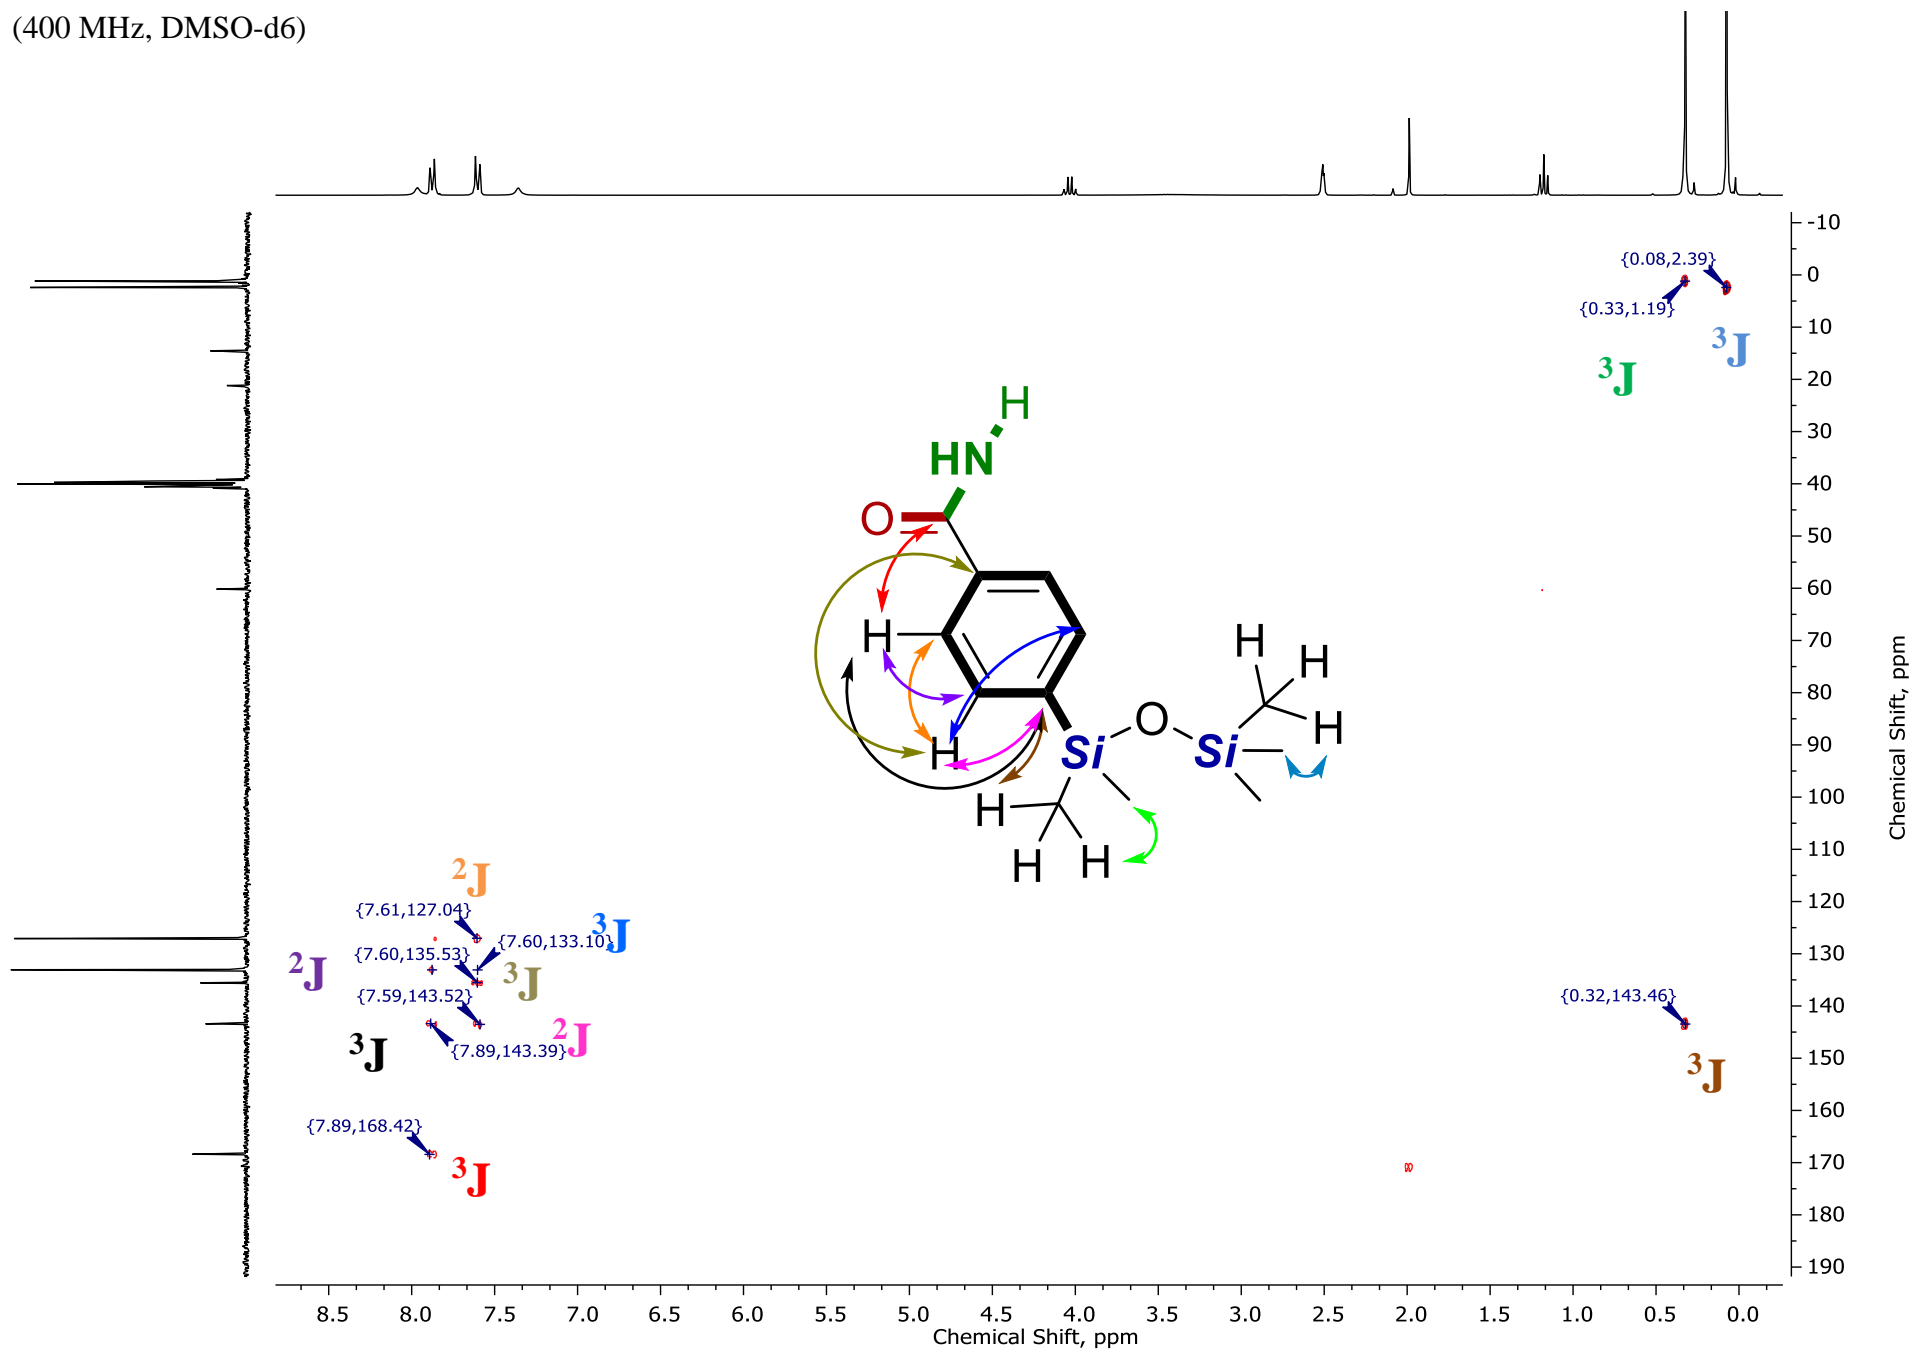

$^1\text{H} - ^{13}\text{C}$  HSQC  
(400 MHz, DMSO-d<sub>6</sub>)

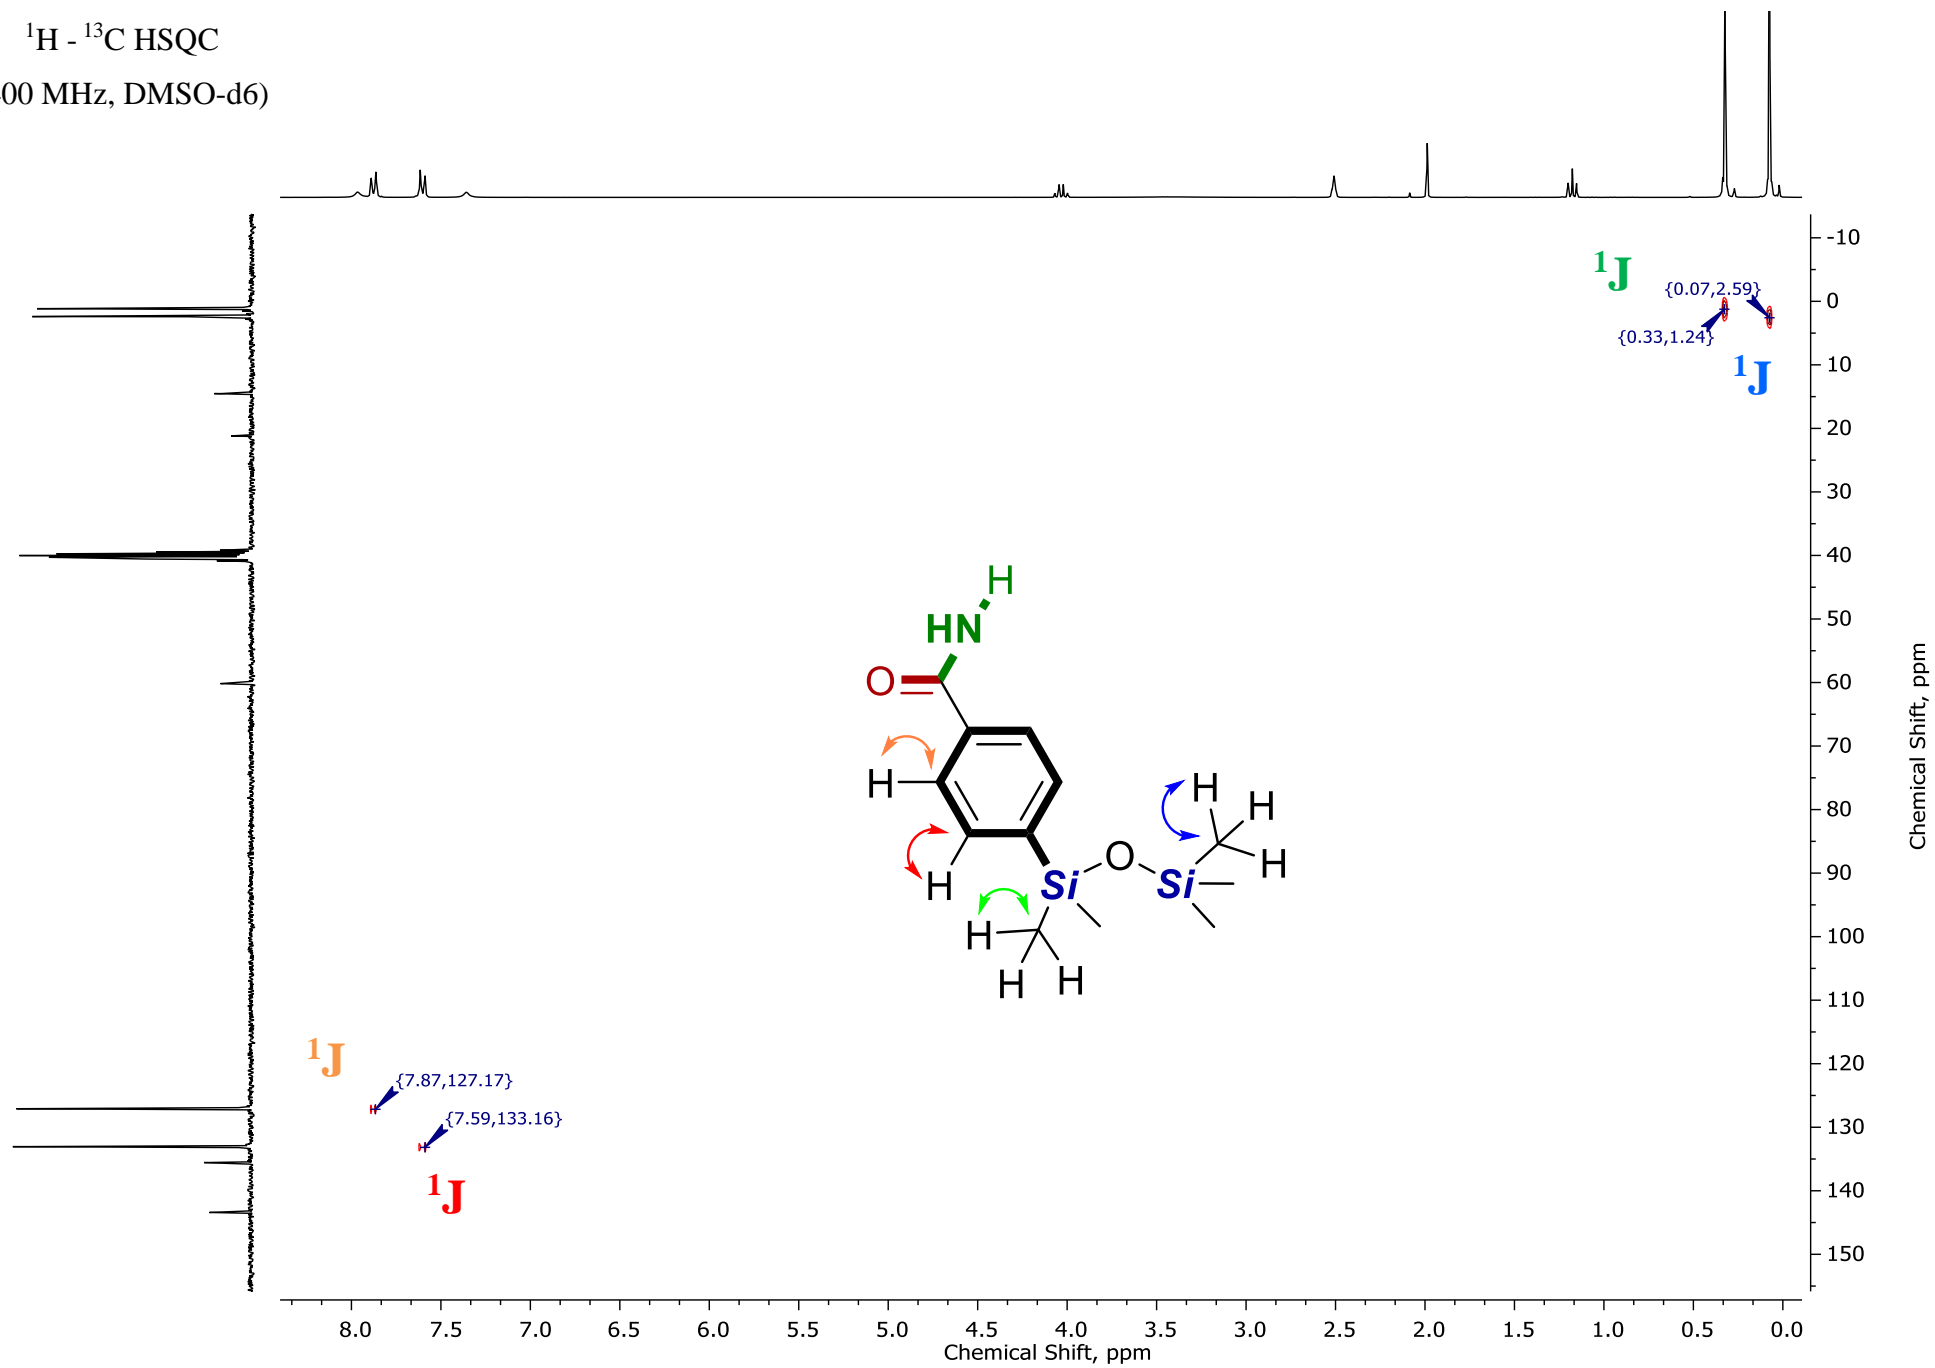

$^1\text{H} - ^{29}\text{Si}$  HMBC

S83

(400 MHz, DMSO-d6)

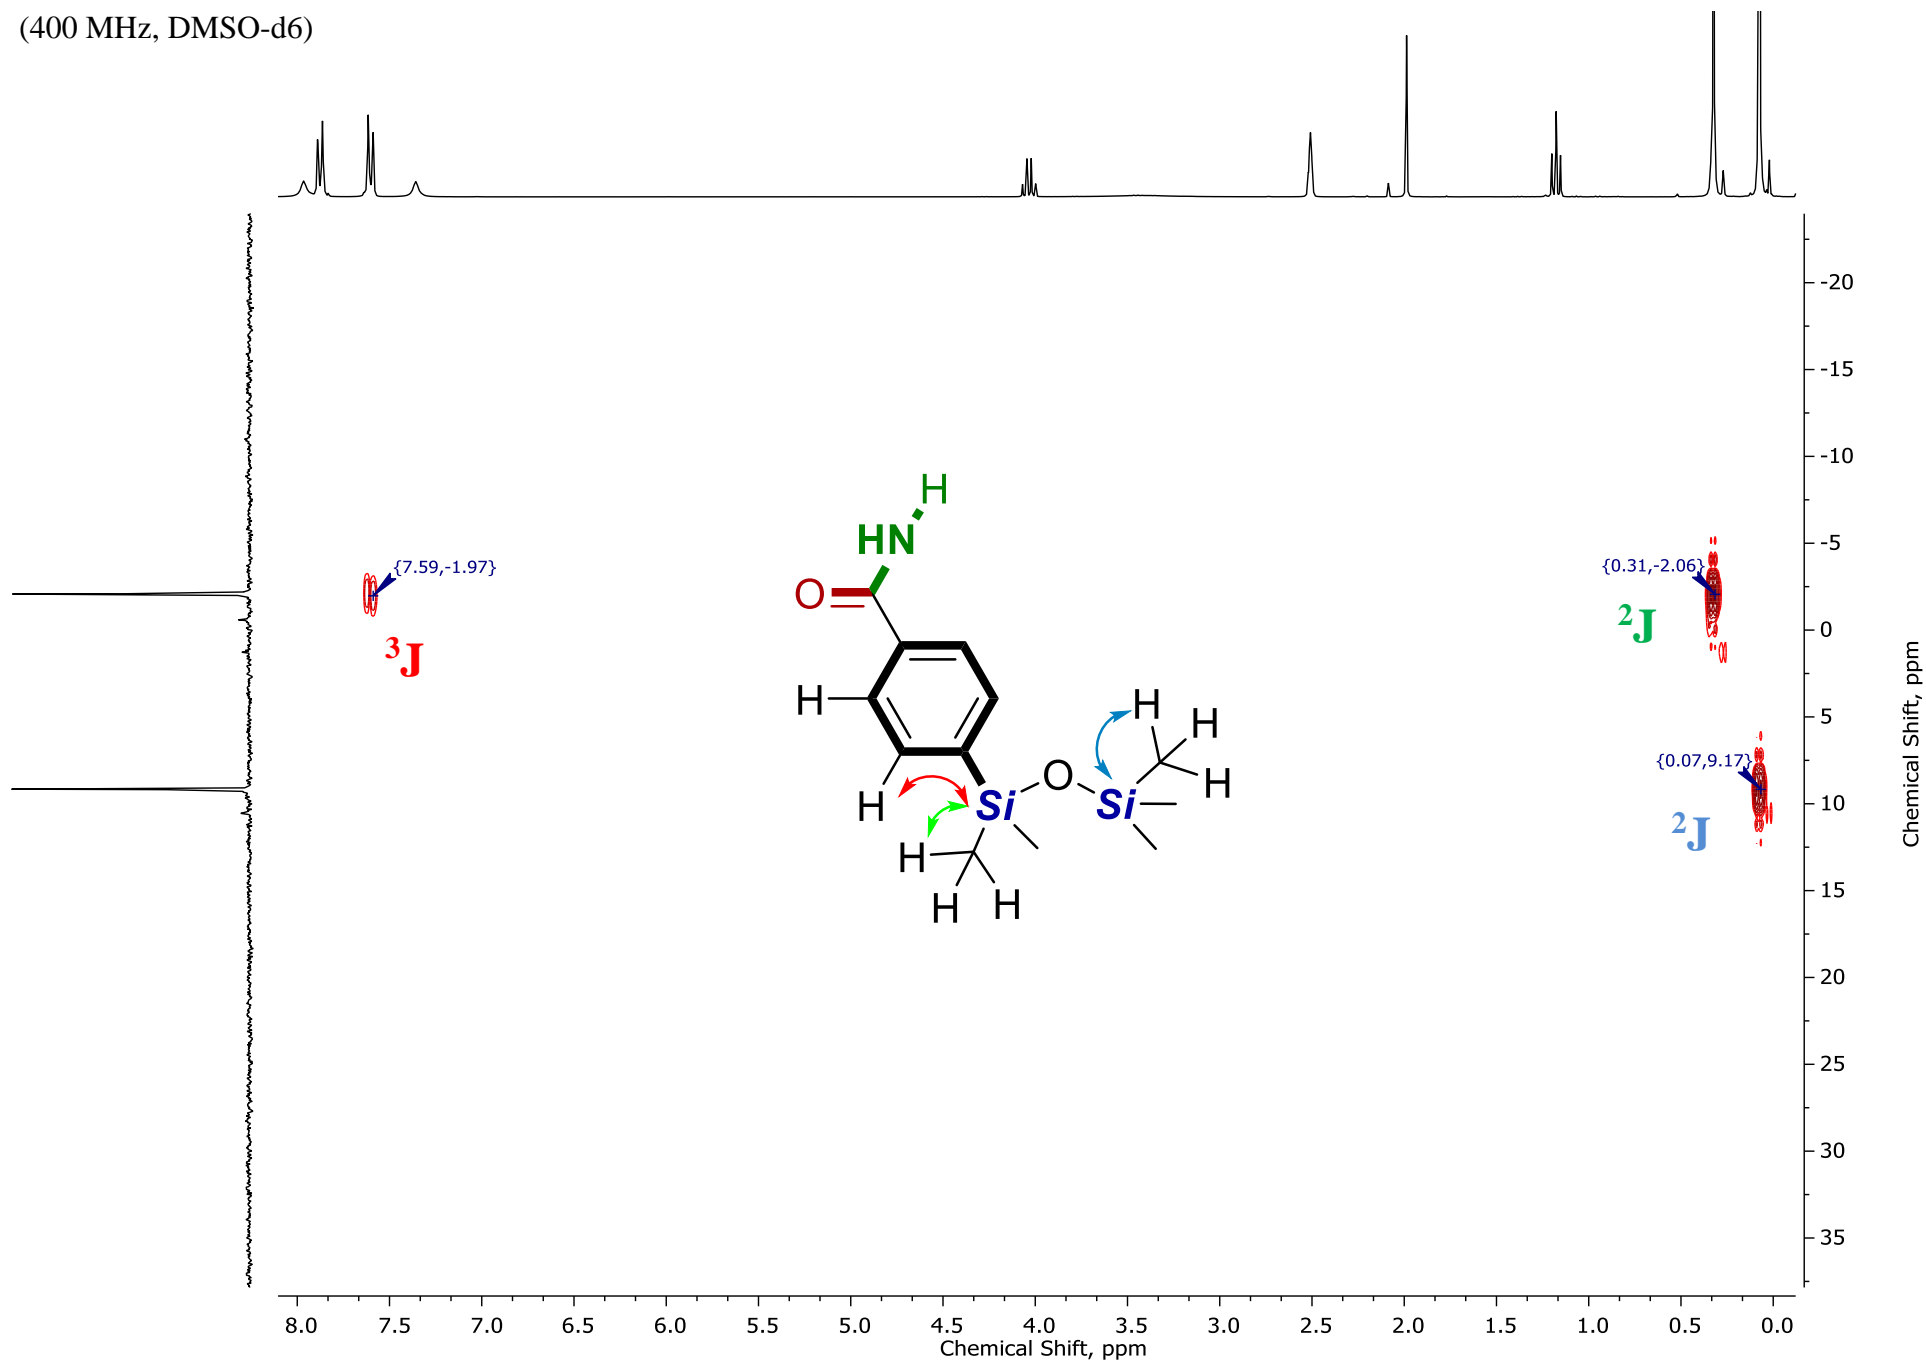

$^1\text{H} - ^{15}\text{N}$  HSQC  
(400 MHz, DMSO-d<sub>6</sub>)

S84

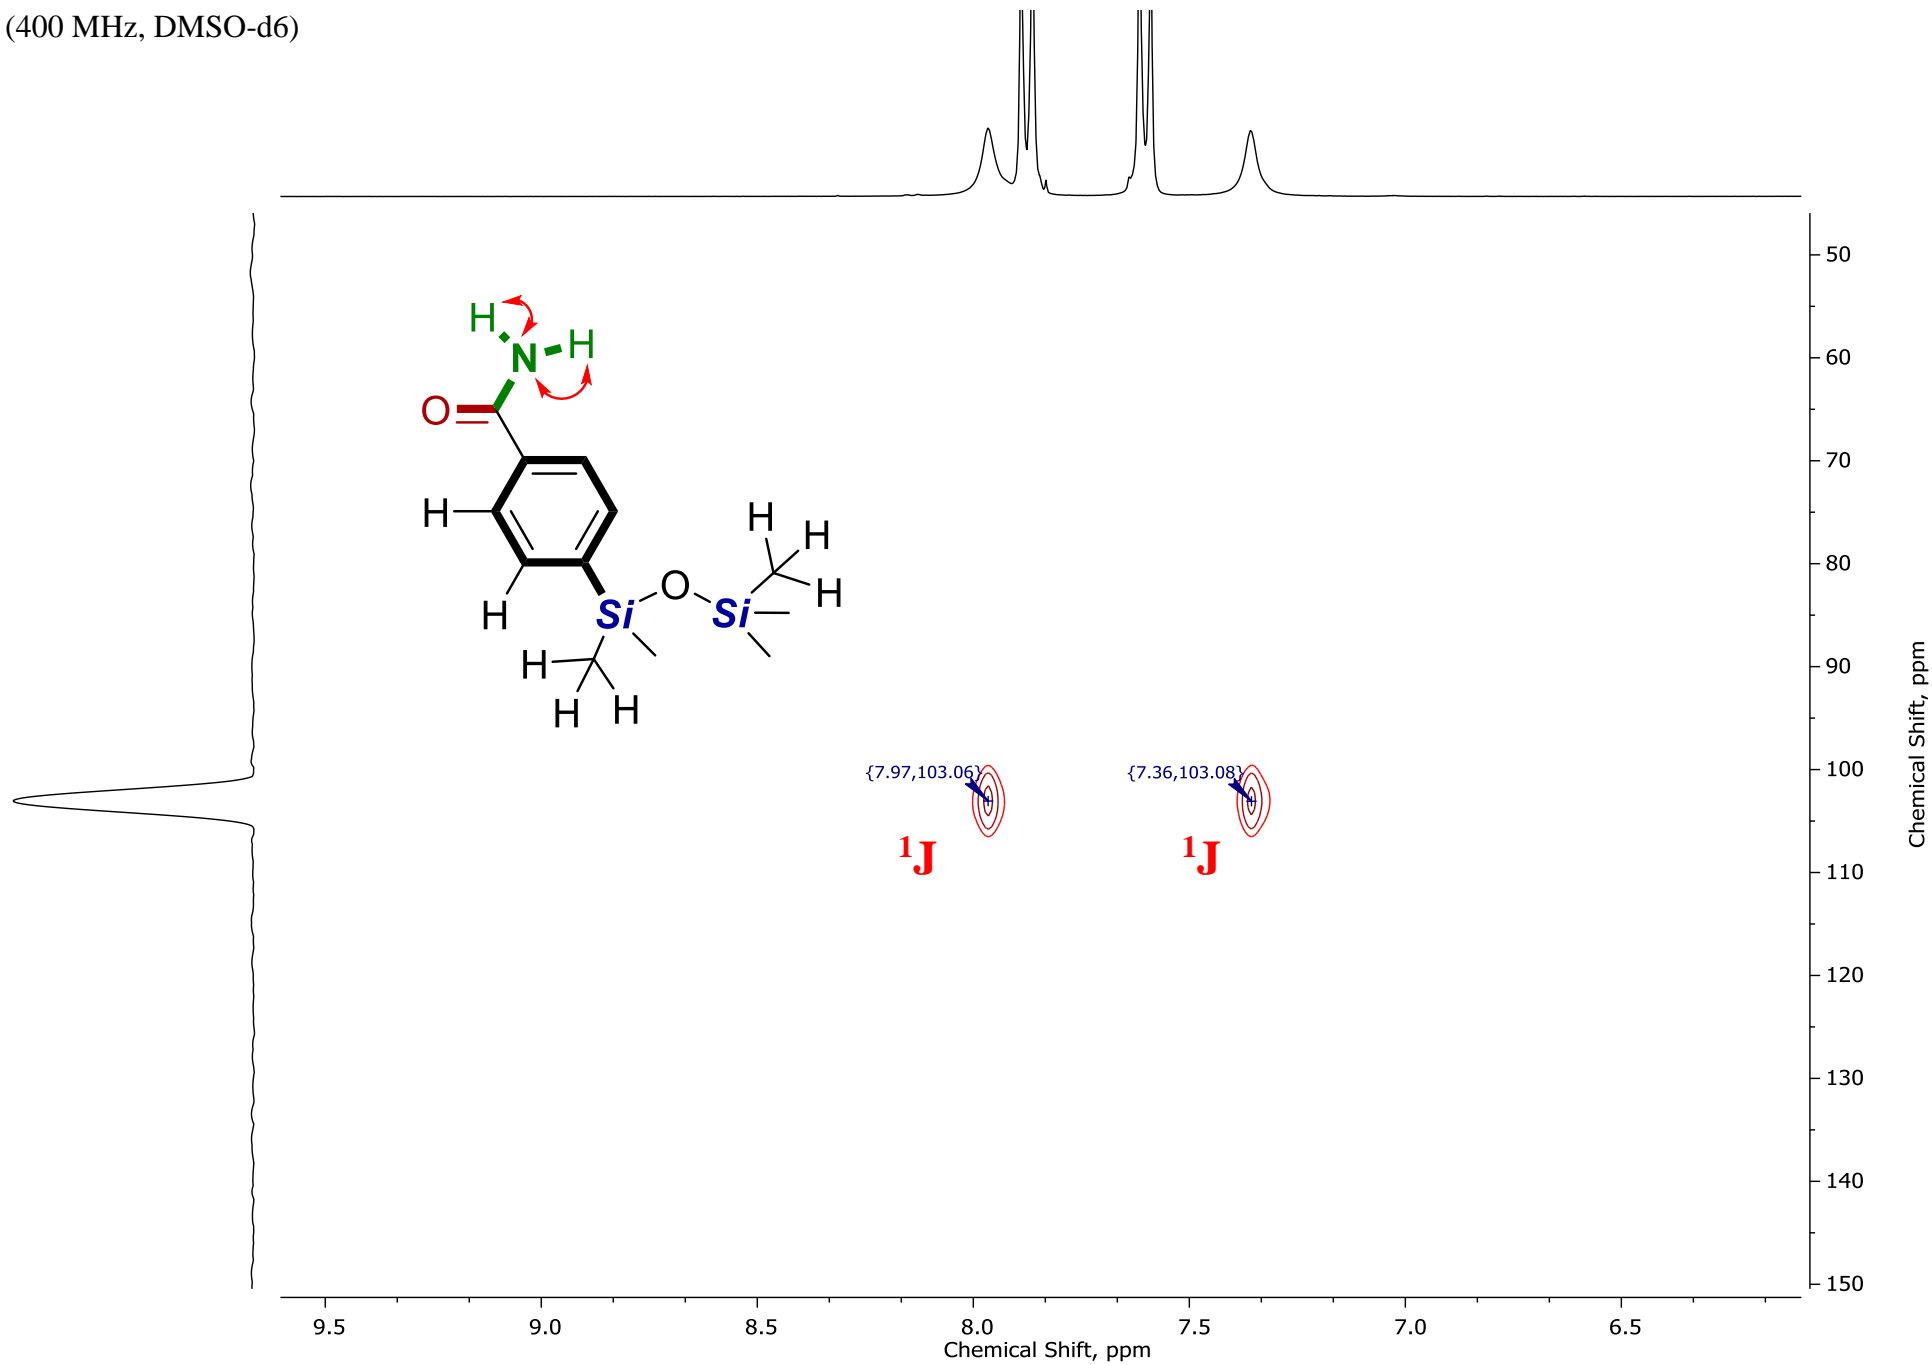

IR spectrum

S85

— 2958

— 1653

~ 1610

— 1547

— 1405

— 1251

— 1067

— 840

— 685

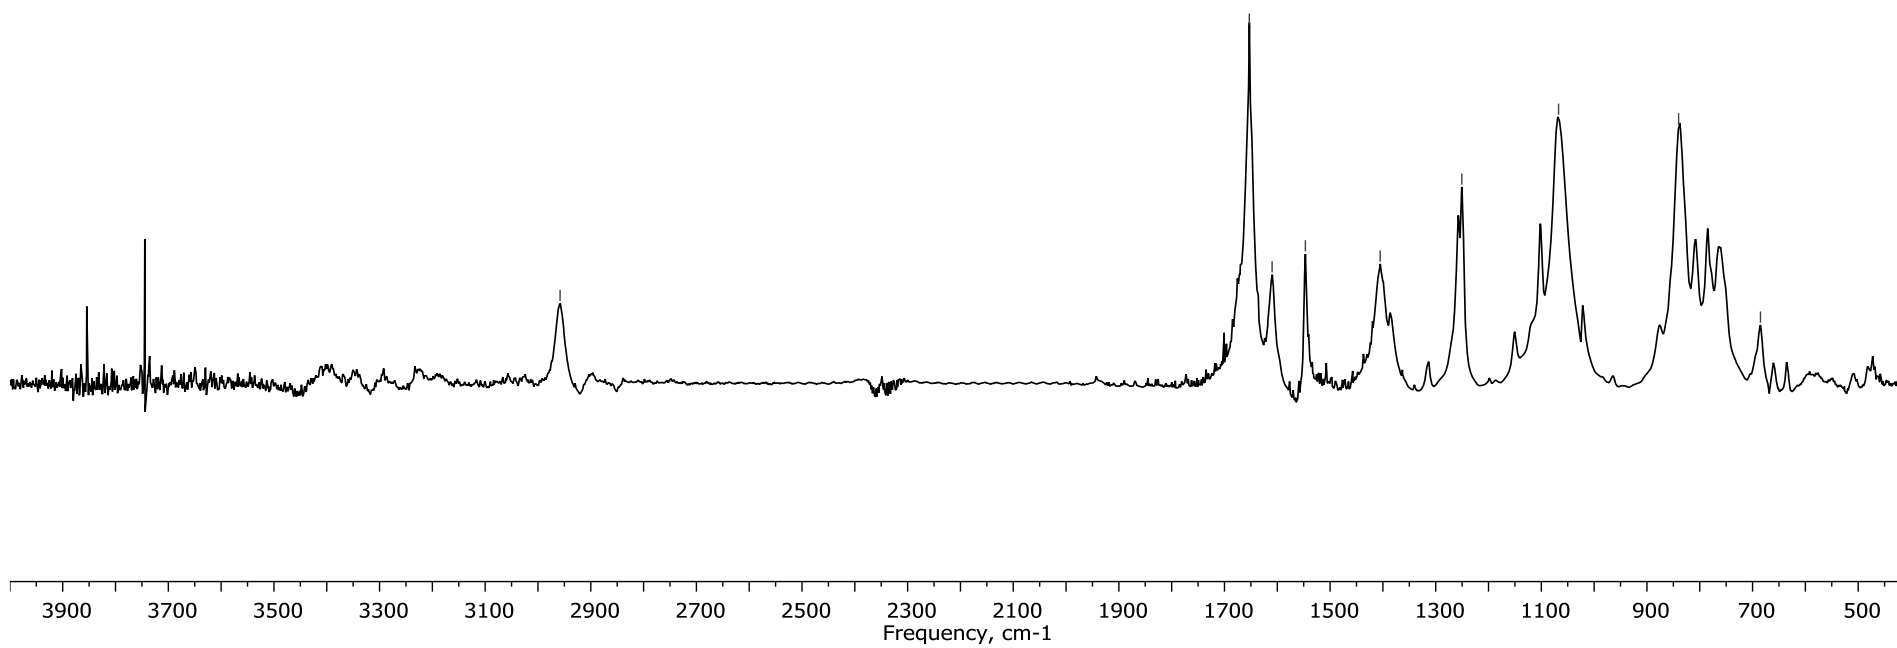

S86

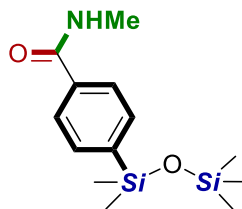

**Characterisation data for N-methyl-4-(1,1,3,3,3-pentamethyldisiloxanyl)benzamide:**

$^1\text{H}$  NMR (400 MHz, DMSO- $d_6$ ):  $\delta$  = 8.43 (m, 1H),  $\delta$  = 7.84 (d,  $^3J=11$  Hz, 2H),  $\delta$  = 7.60 (d,  $^3J=11$  Hz, 2H),  $\delta$  = 2.80 (d,  $^3J=6$  Hz, 3H),  $\delta$  = 0.31 (s, 6H),  $\delta$  = 0.06 (s, 7H).  $^{13}\text{C}$  NMR (100 MHz, DMSO- $d_6$ ):  $\delta$  = 166.58, 142.64, 135.32, 132.60, 126.20, 26.16, 1.87, 0.63.  $^{29}\text{Si}$  NMR (80 MHz, DMSO- $d_6$ ):  $\delta$  = 9.62, -2.09.  $^{15}\text{N}$  NMR (40 MHz, DMSO- $d_6$ ):  $\delta$  = 99.40. HRMS (ESI)  $m/z$   $[\text{M} + \text{H}]^+$ : calcd for  $[\text{C}_{13}\text{H}_{23}\text{NO}_2\text{Si}_2 + \text{H}]^+$ , 282.1340; found, 282.1351. IR ( $\text{cm}^{-1}$ ): 3323, 2958, 1636, 1543, 1411, 1318, 1255, 1160-1036, 877-639.

<sup>1</sup>H NMR

(400 MHz, DMSO-d6)

S87

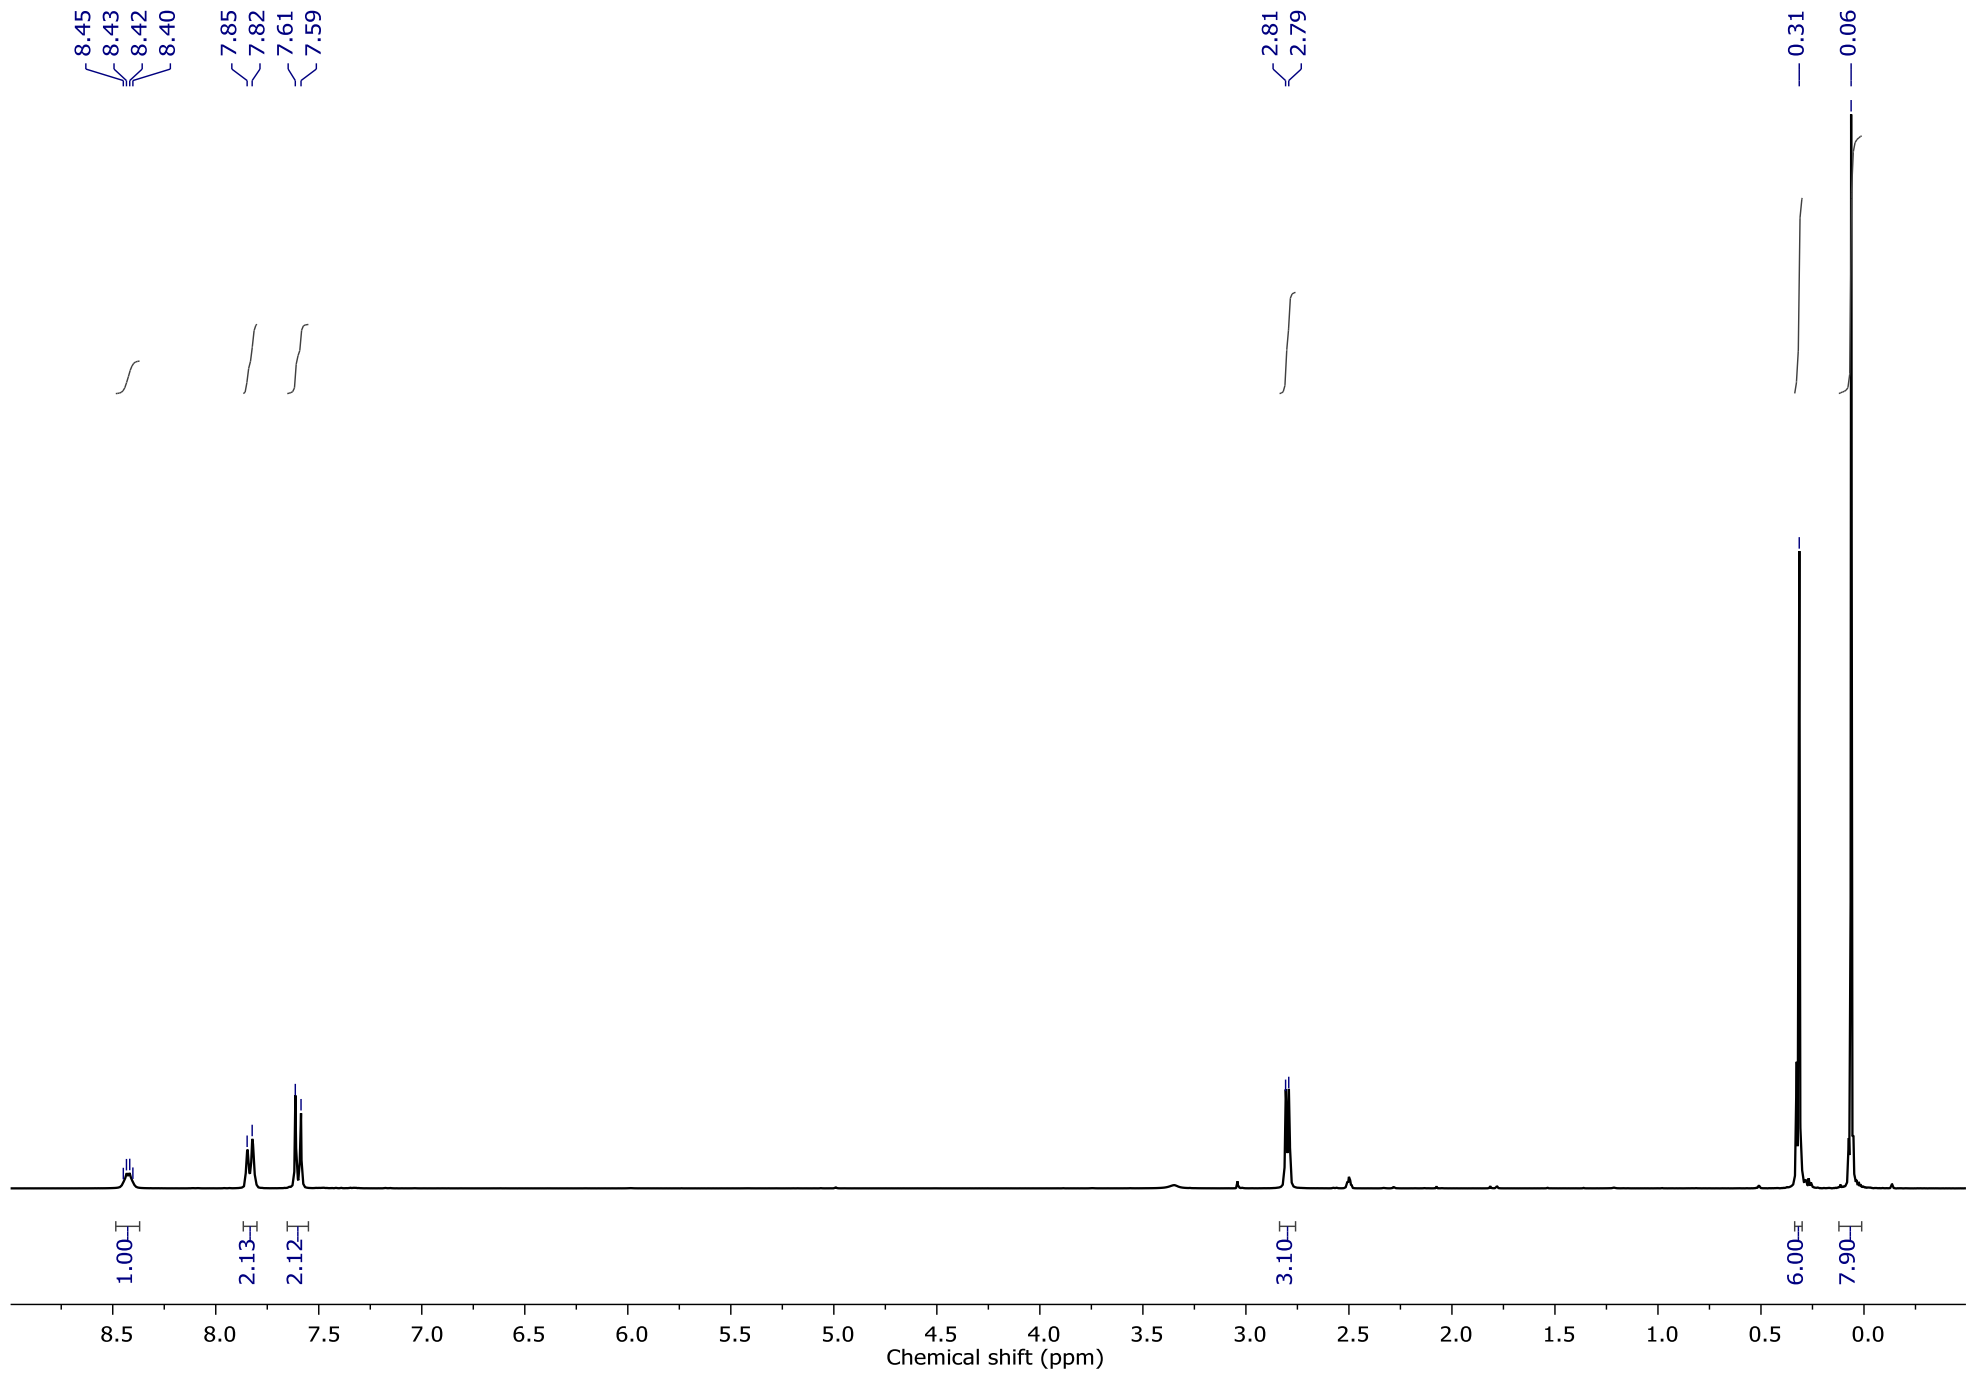

<sup>13</sup>C NMR

(100 MHz, DMSO-d6)

S88

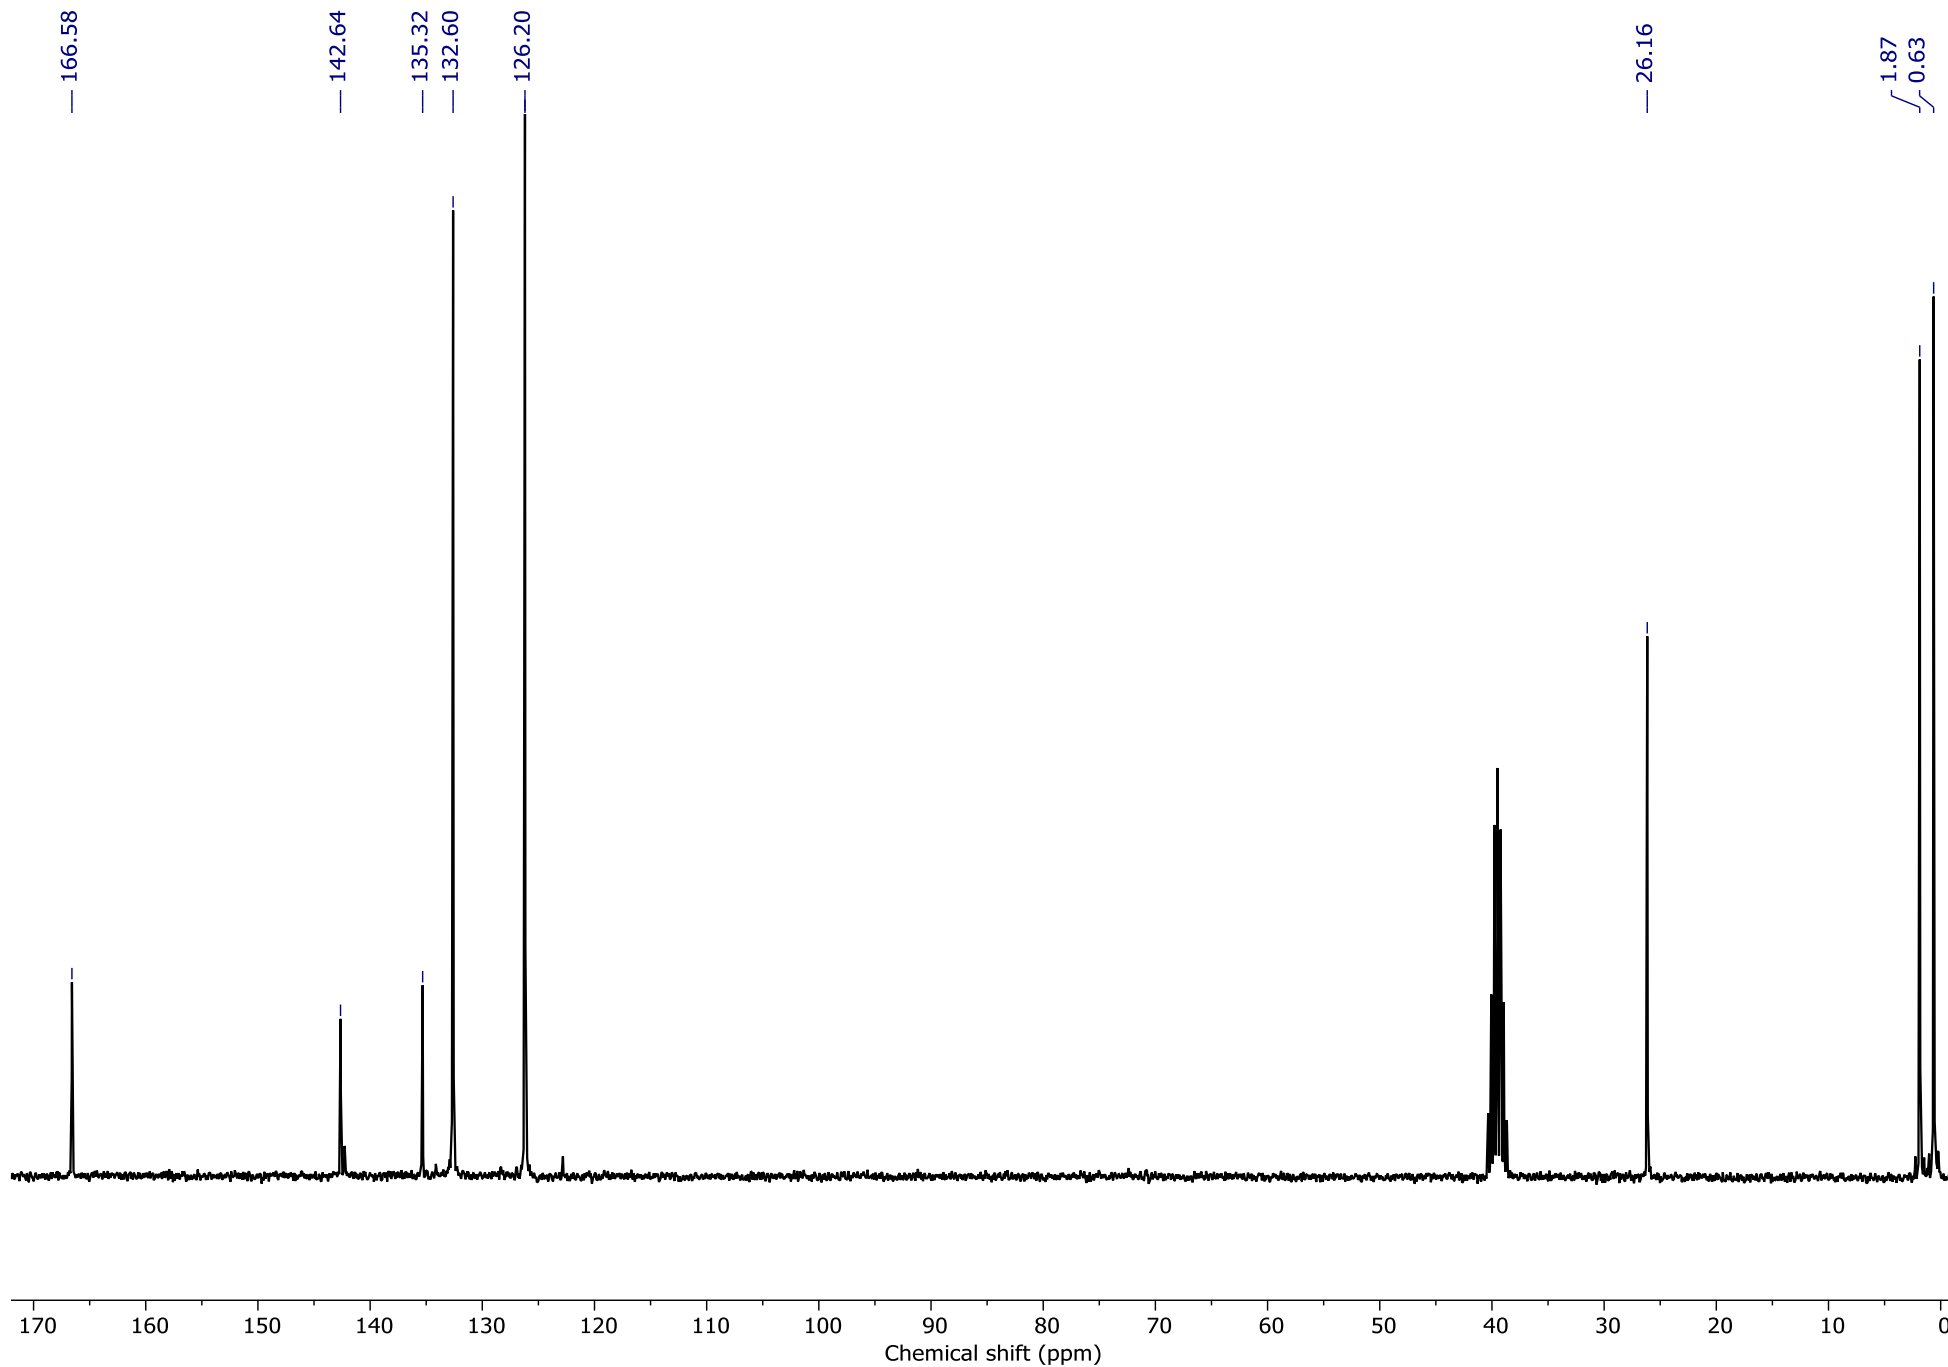



<sup>29</sup>Si NMR  
(80 MHz, DMSO-d<sub>6</sub>)

S89

9.62  
-2.09

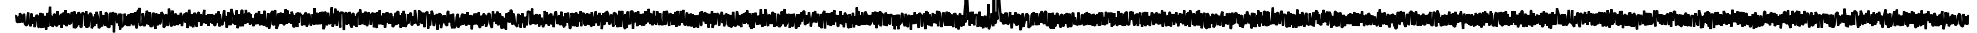

Chemical shift (ppm)

$^{15}\text{N}$  NMR (reconstructed,  
40 MHz, DMSO-d6)

S90

99.40

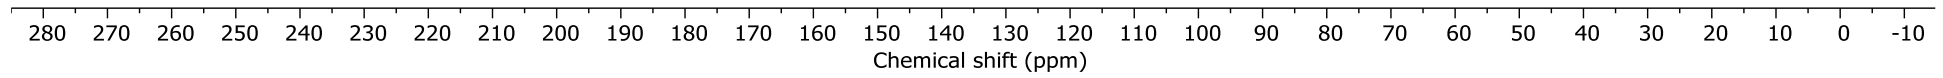

$^1\text{H} - ^{13}\text{C}$  HMBC

S91

(400 MHz, DMSO-d6)

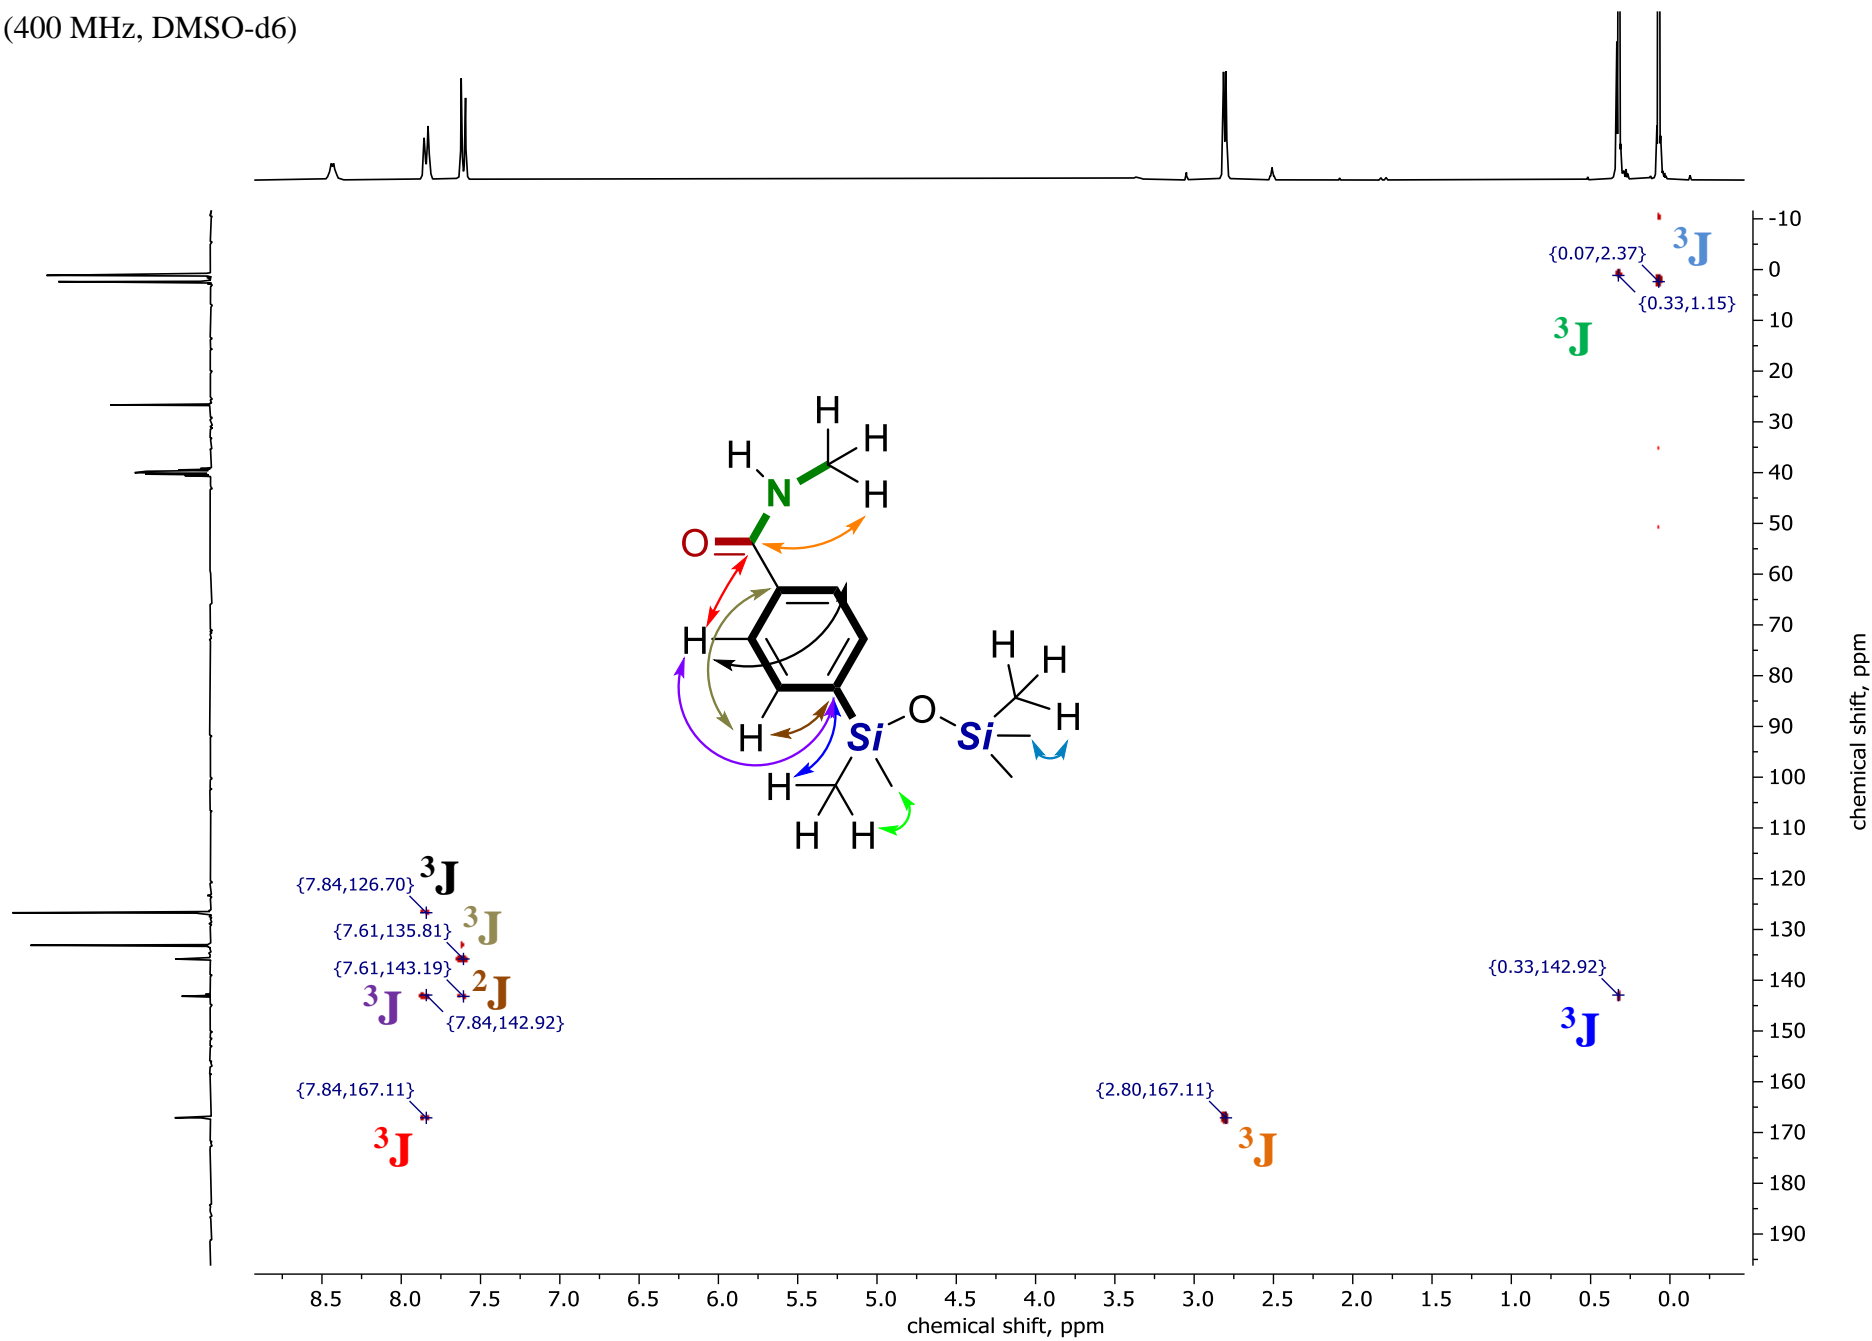

$^1\text{H} - ^{13}\text{C}$  HSQC  
(400 MHz, DMSO-d<sub>6</sub>)

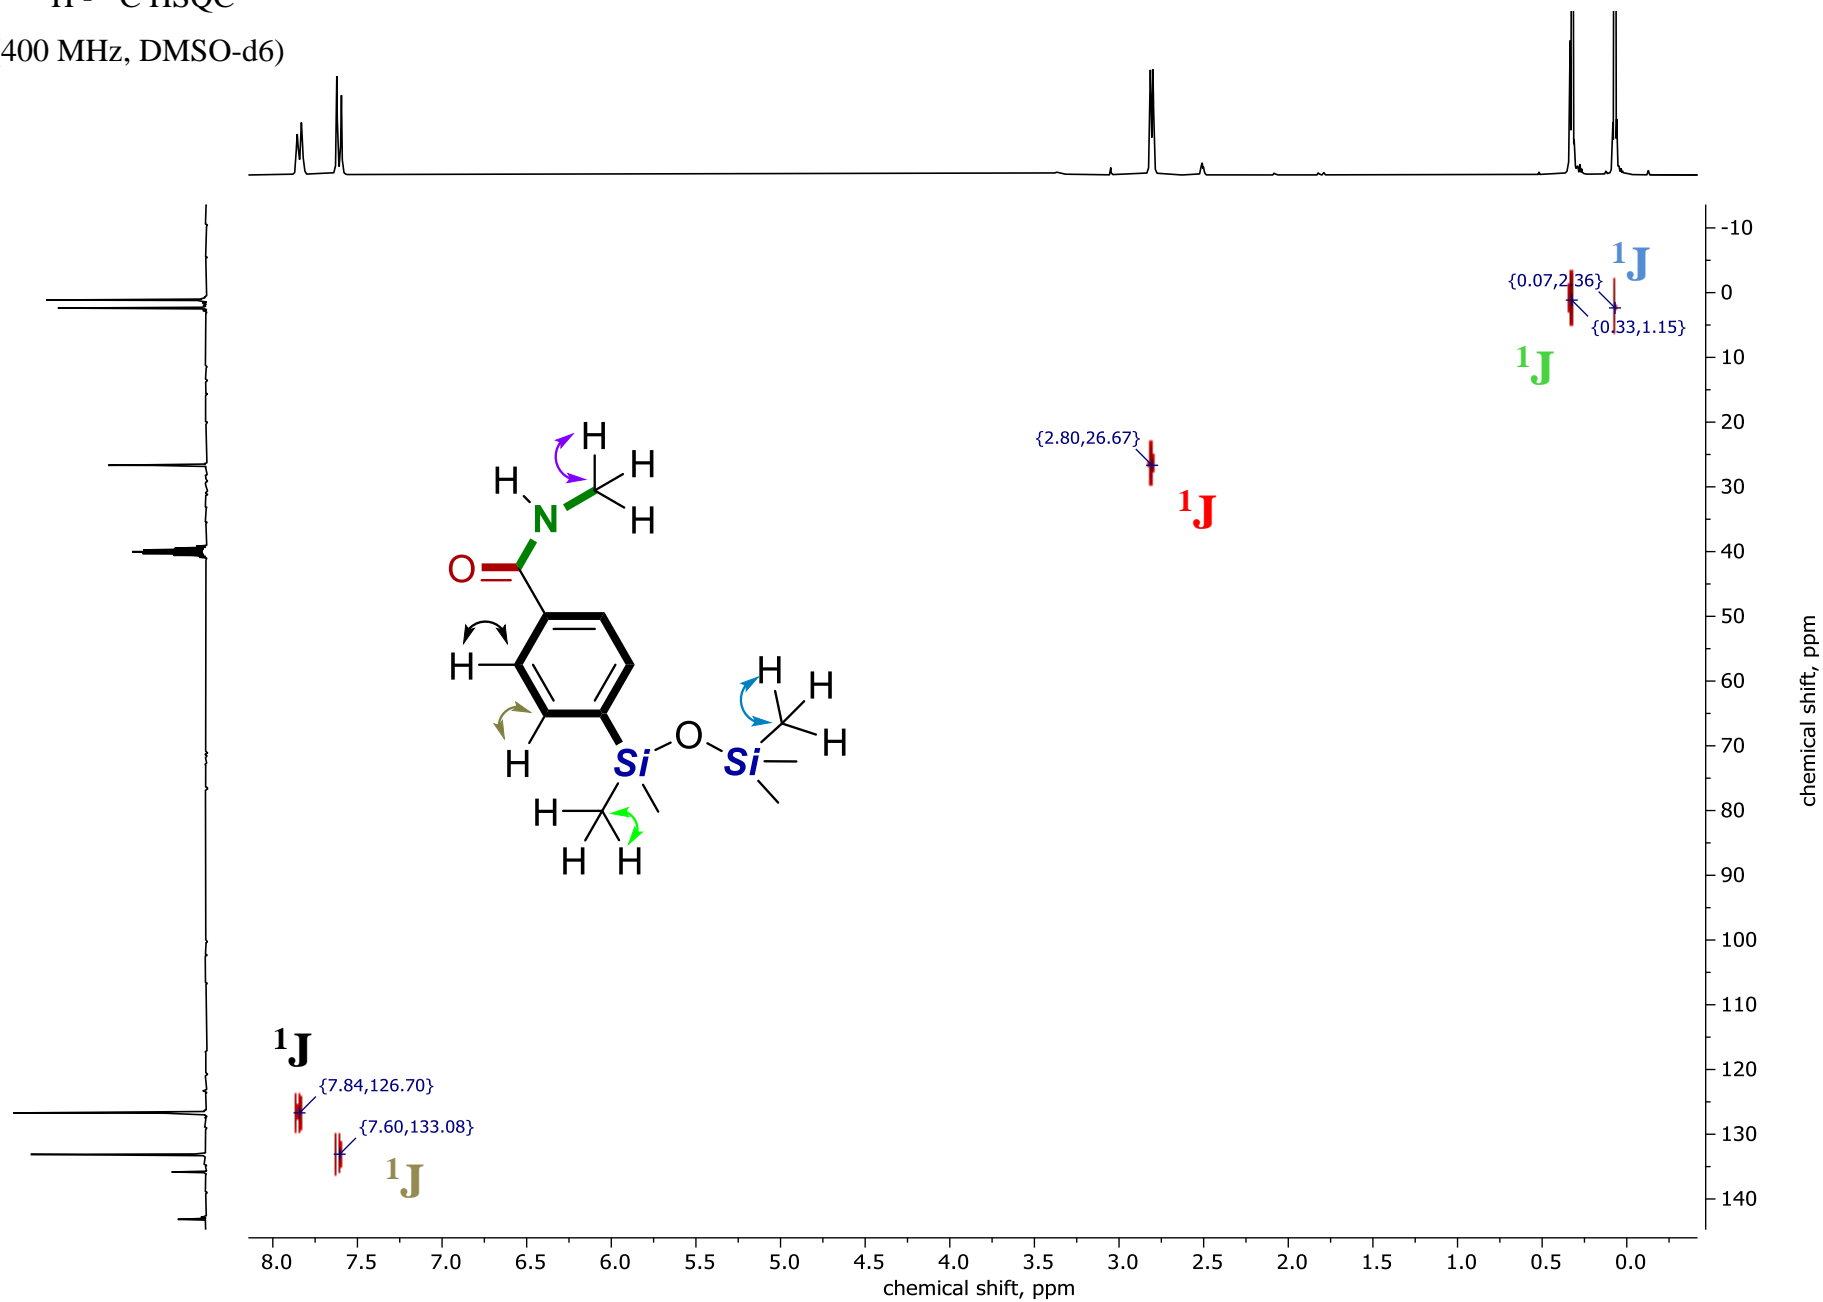

$^1\text{H} - ^{29}\text{Si}$  HMBC

S93

(400 MHz, DMSO-d<sub>6</sub>)

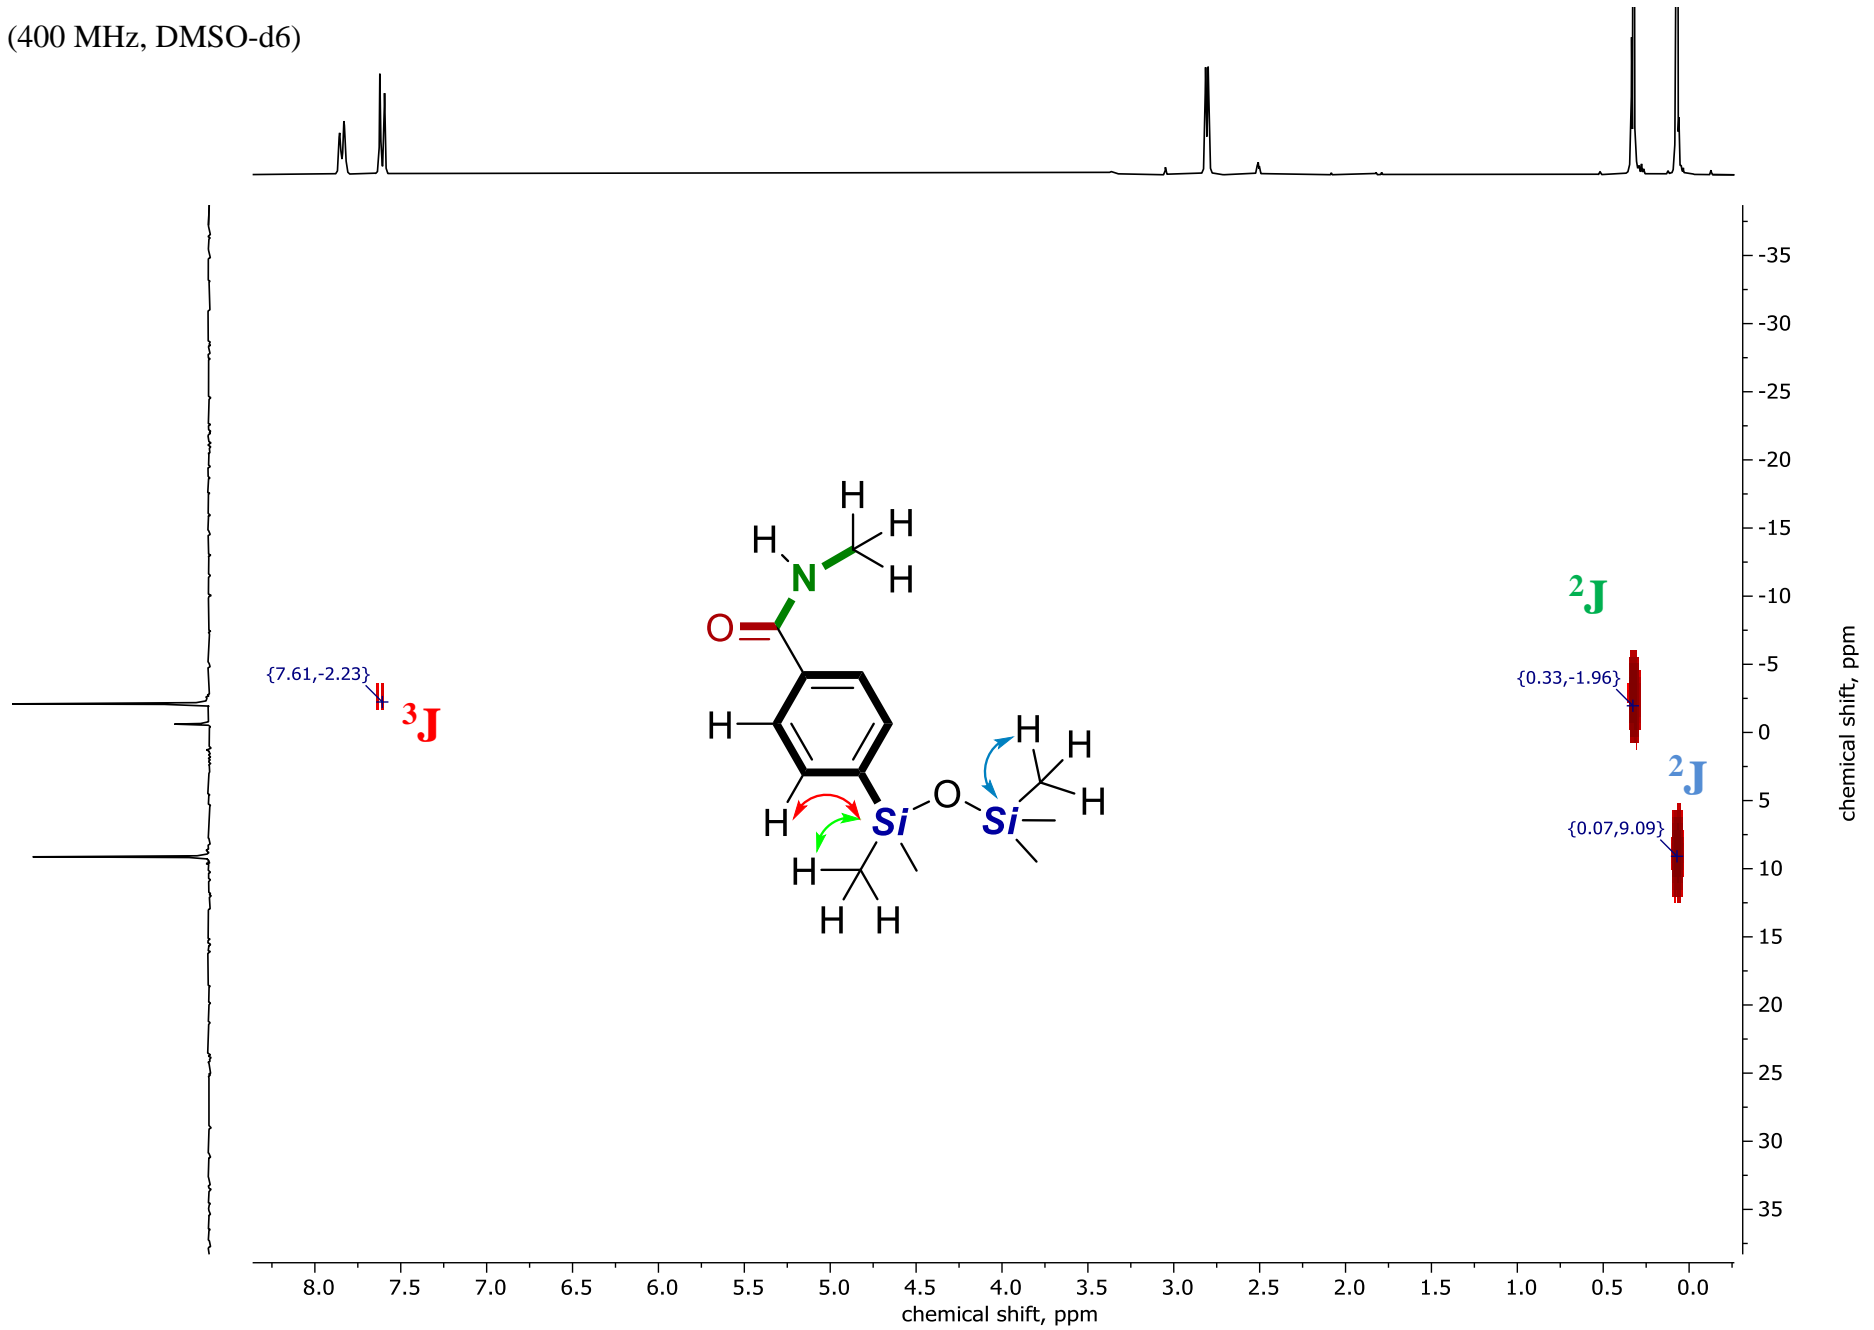

$^1\text{H} - ^{15}\text{N}$  HMBC

S94

(400 MHz, DMSO-d6)

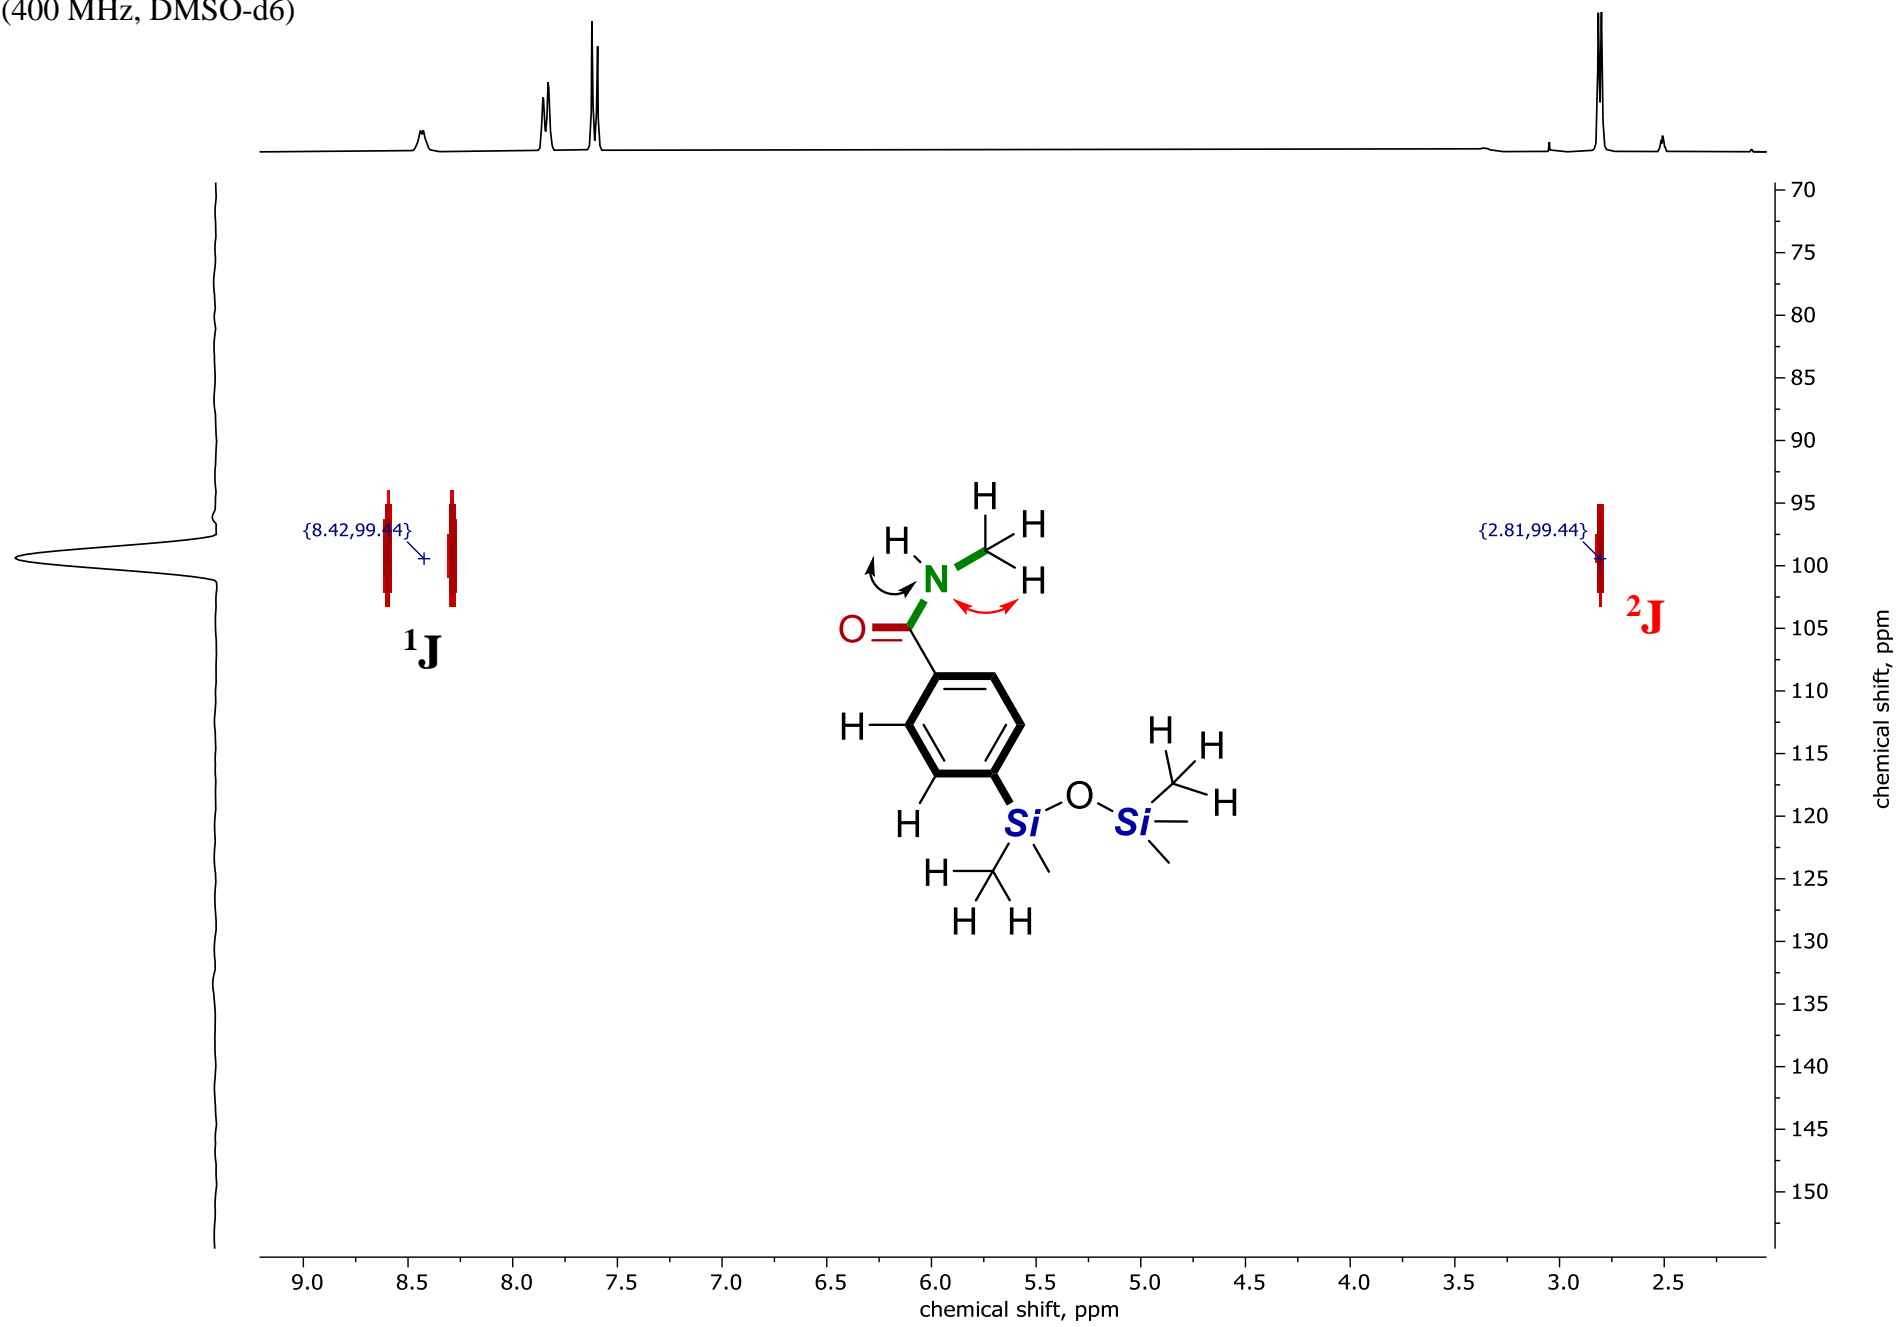

$^1\text{H} - ^{15}\text{N}$  HSQC

(400 MHz, DMSO-d6)

S95

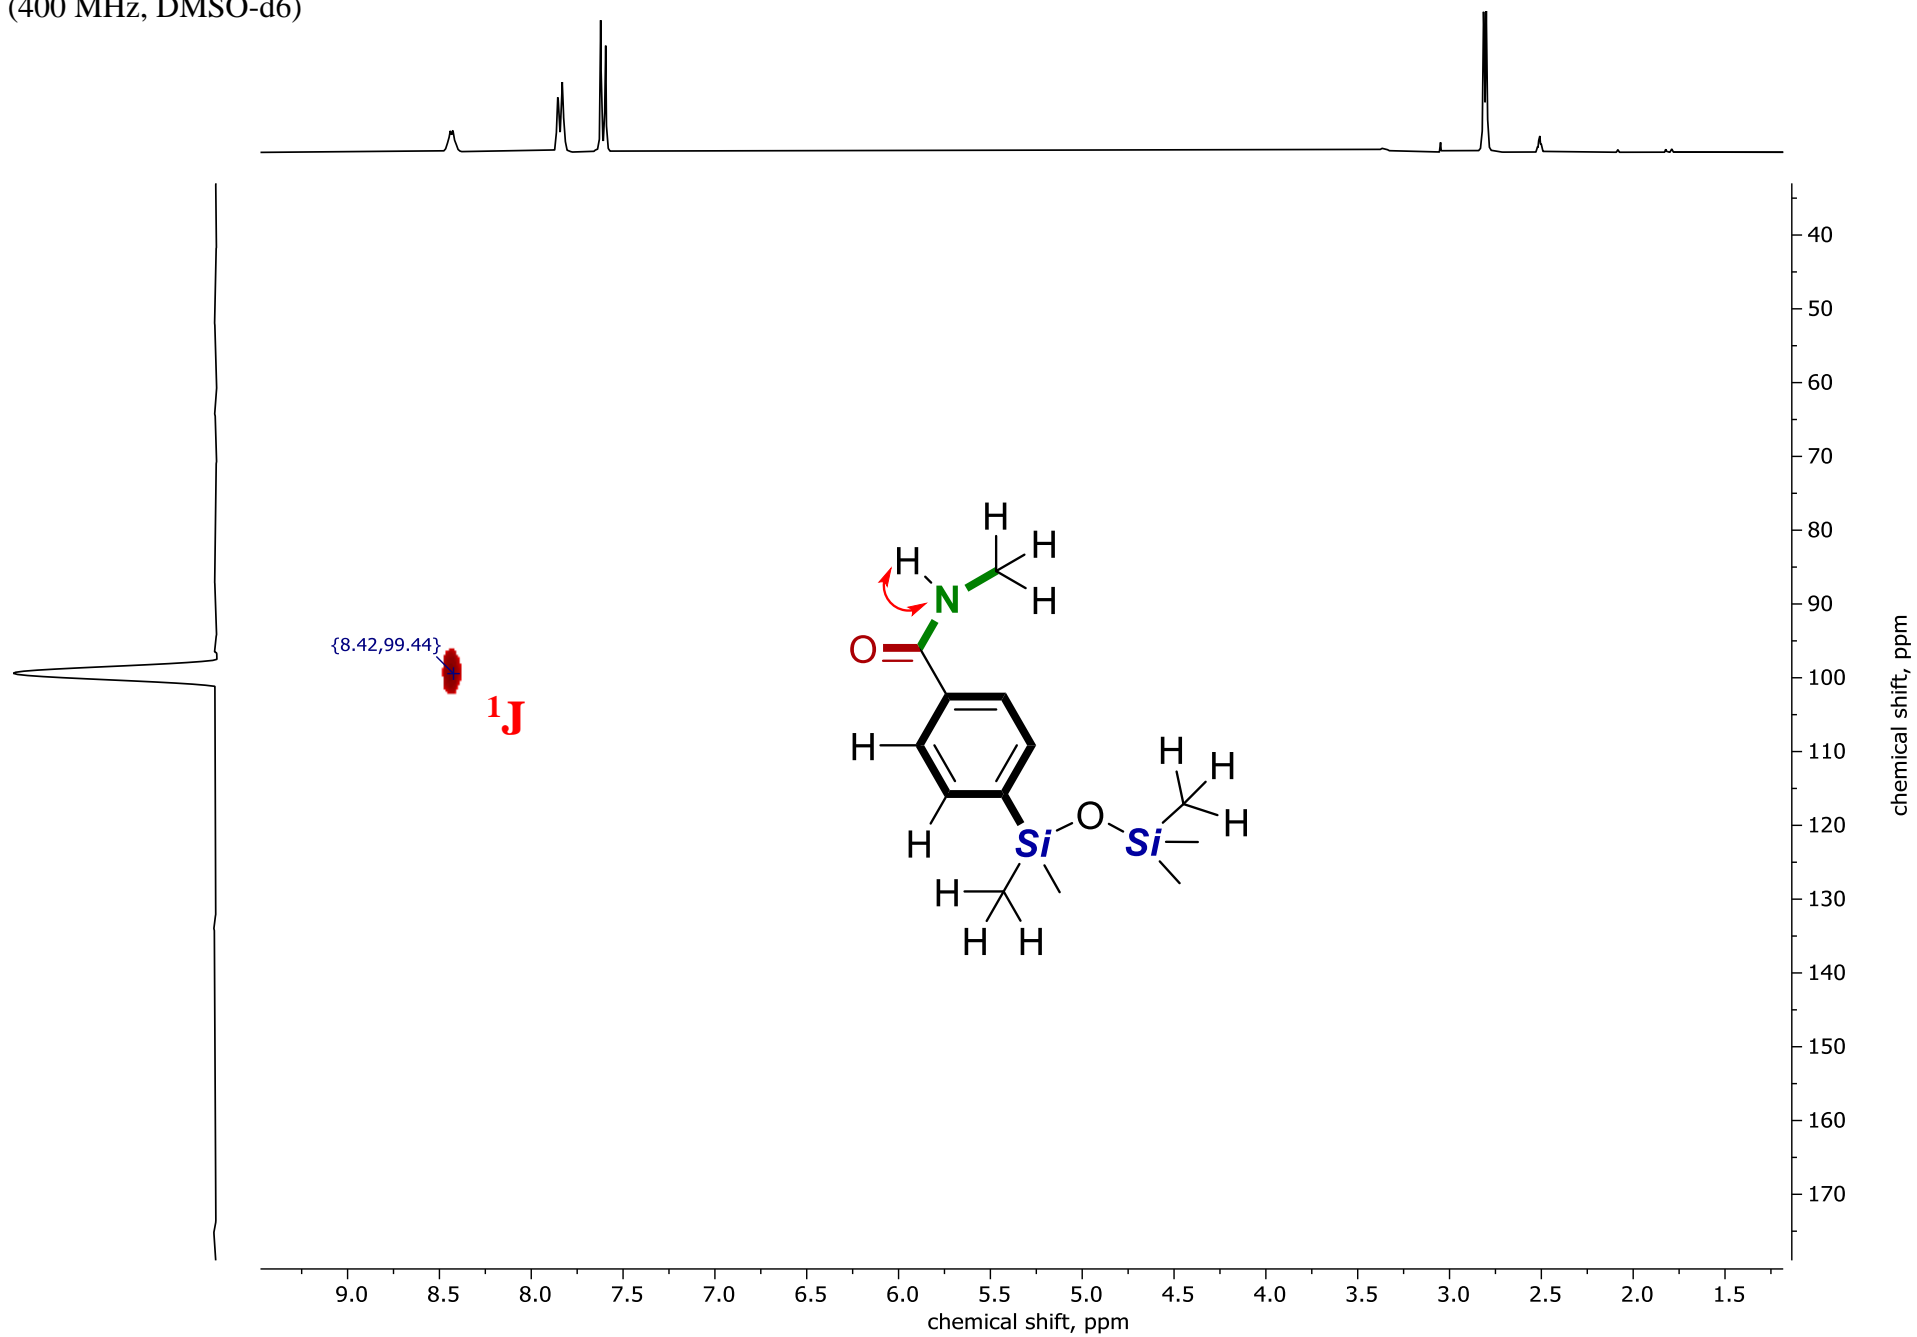

S96

IR spectrum

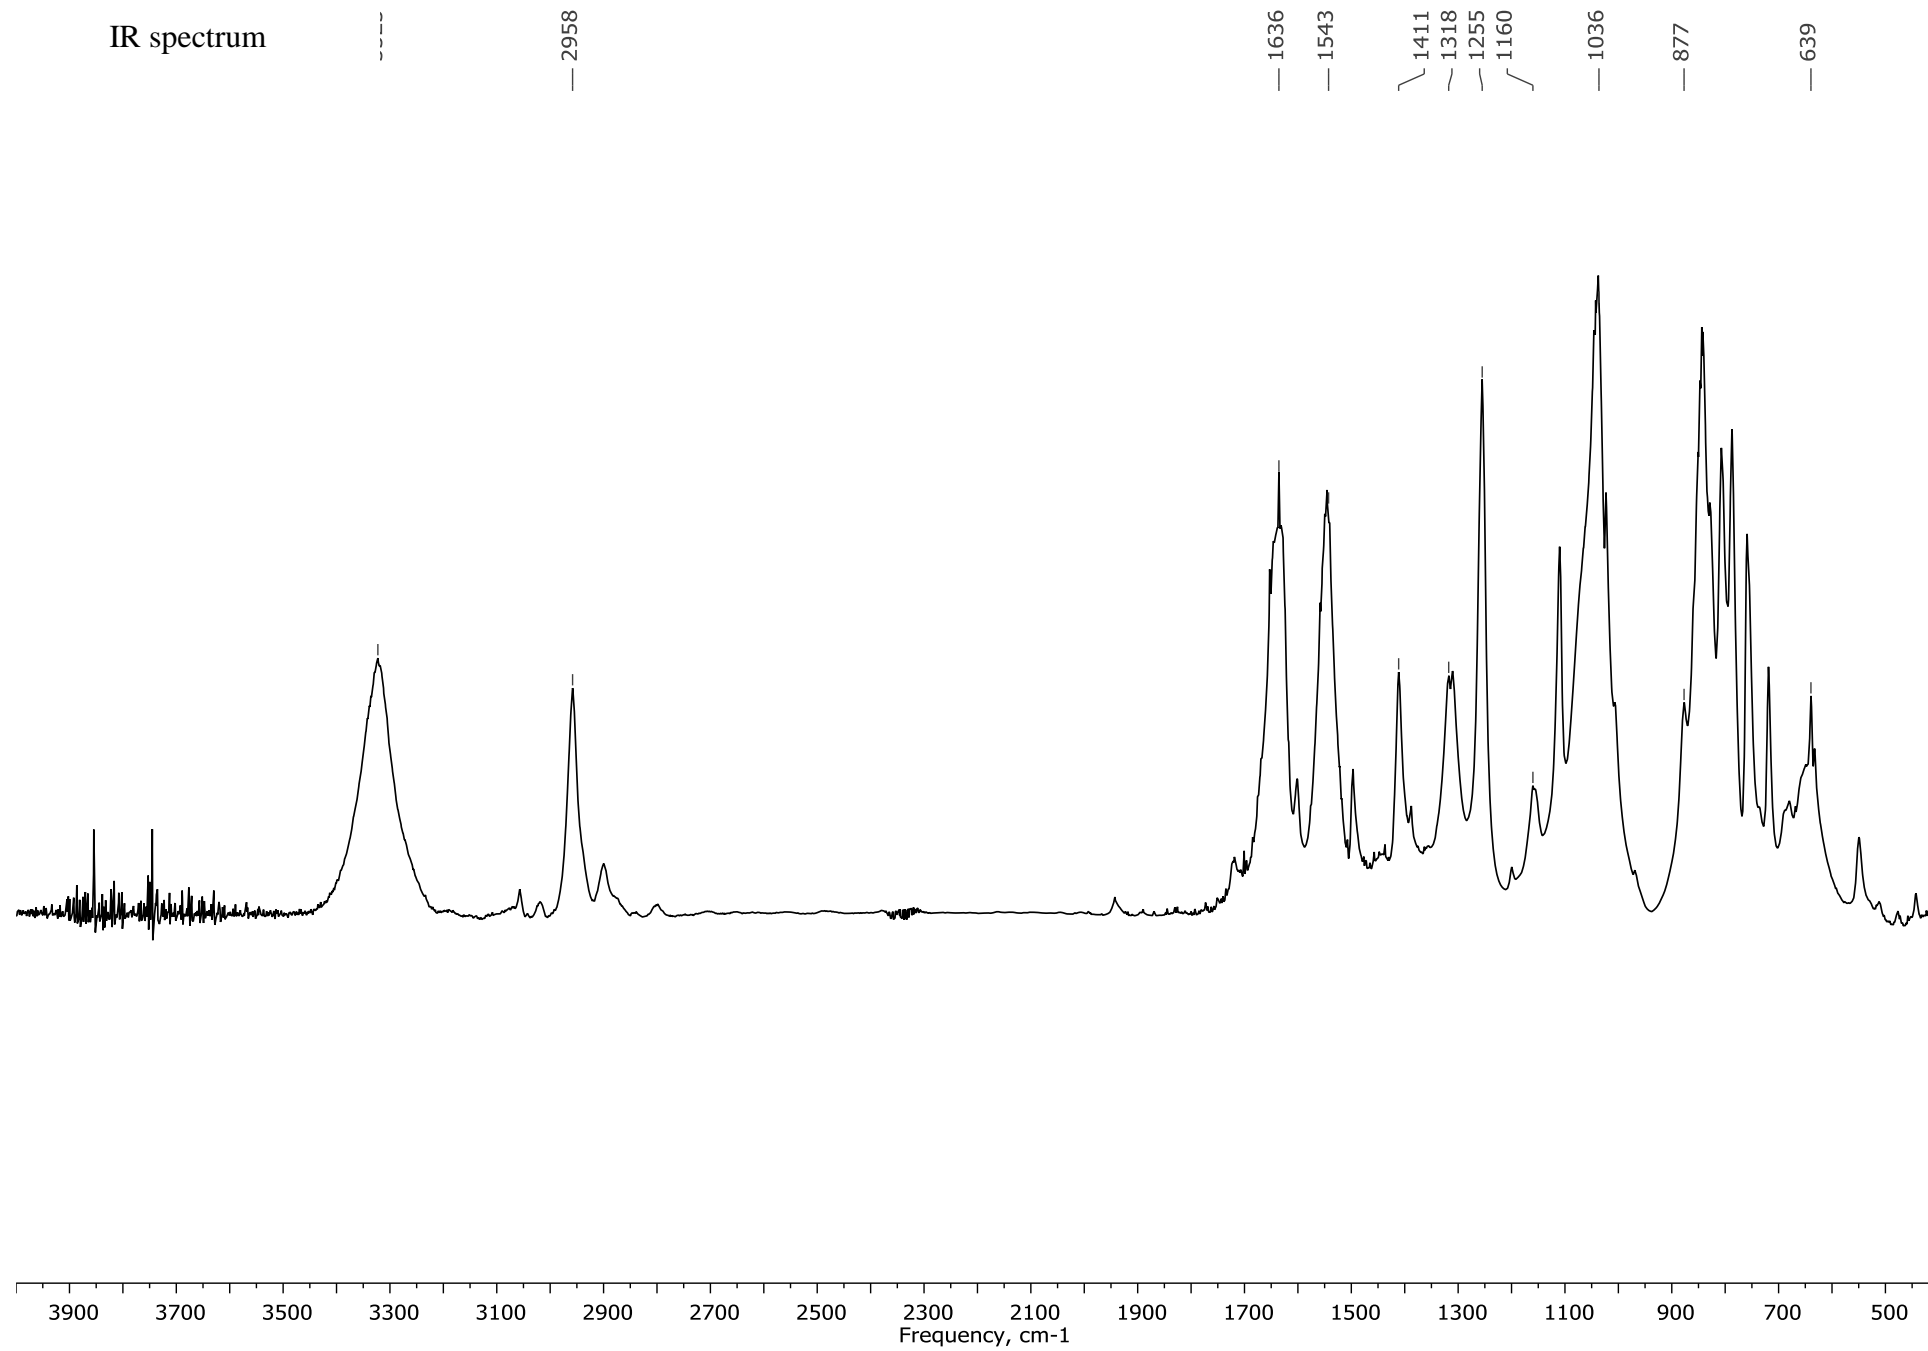



HRMS (ESI)

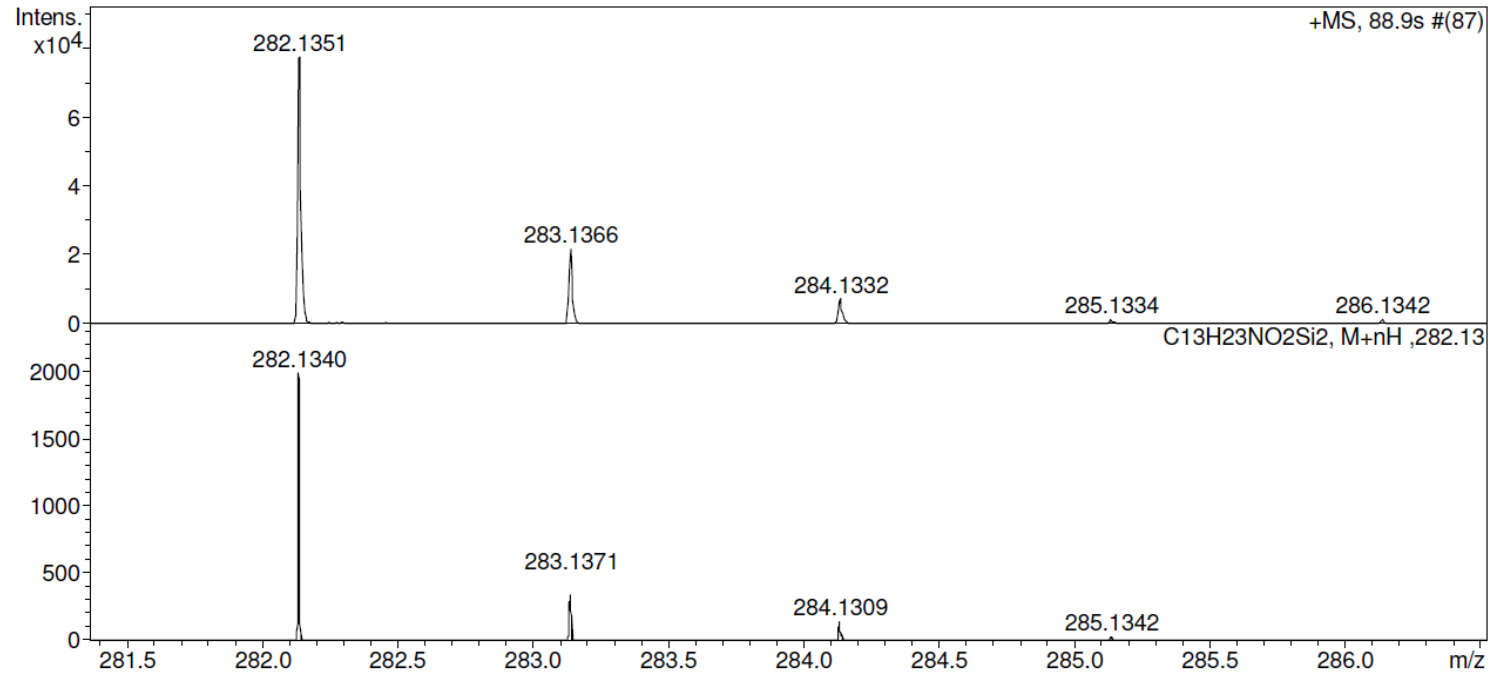

S98

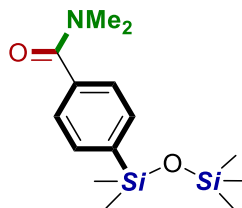

**Characterisation data for N,N-dimethyl-4-(1,1,3,3,3-pentamethyldisiloxanyl)benzamide:**

<sup>1</sup>H NMR (400 MHz, DMSO-d<sub>6</sub>):  $\delta = 7.59$  (d, <sup>3</sup>J=11 Hz, 2H),  $\delta = 7.40$  (d, <sup>3</sup>J=11 Hz, 2H),  $\delta = 2.99$  (s, 3H),  $\delta = 2.89$  (s, 3H),  $\delta = 0.33$  (s, 6H),  $\delta = 0.08$  (s, 9H). <sup>13</sup>C NMR (100 MHz, DMSO-d<sub>6</sub>):  $\delta = 169.96$ , 140.68, 137.38, 132.58, 126.07, 34.60, 1.91, 0.68. <sup>29</sup>Si NMR (80 MHz, DMSO-d<sub>6</sub>):  $\delta = 9.15$ , -2.10. It appeared to be feasible to obtain neither <sup>15</sup>N NMR nor <sup>1</sup>H – <sup>15</sup>N HMBC due to the symmetry of the molecule and <sup>15</sup>N relaxation characteristics. HRMS (ESI) m/z [M + H]<sup>+</sup>: calcd for [C<sub>14</sub>H<sub>25</sub>NO<sub>2</sub>Si<sub>2</sub> + H]<sup>+</sup>, 296.1497; found, 296.1501; [M + Na]<sup>+</sup>: calcd for [C<sub>14</sub>H<sub>25</sub>NO<sub>2</sub>Si<sub>2</sub> + Na]<sup>+</sup>, 318.1316; found, 318.1314; [M + K]<sup>+</sup>: calcd for [C<sub>14</sub>H<sub>25</sub>NO<sub>2</sub>Si<sub>2</sub> + K]<sup>+</sup>, 334.1055; found, 334.1055. IR (cm<sup>-1</sup>): 3620-3189, 2956, 1932, 1720, 1636, 1545-1394, 1257, 1118-1020, 876-676.

<sup>1</sup>H NMR

(400 MHz, DMSO-d6)

S99

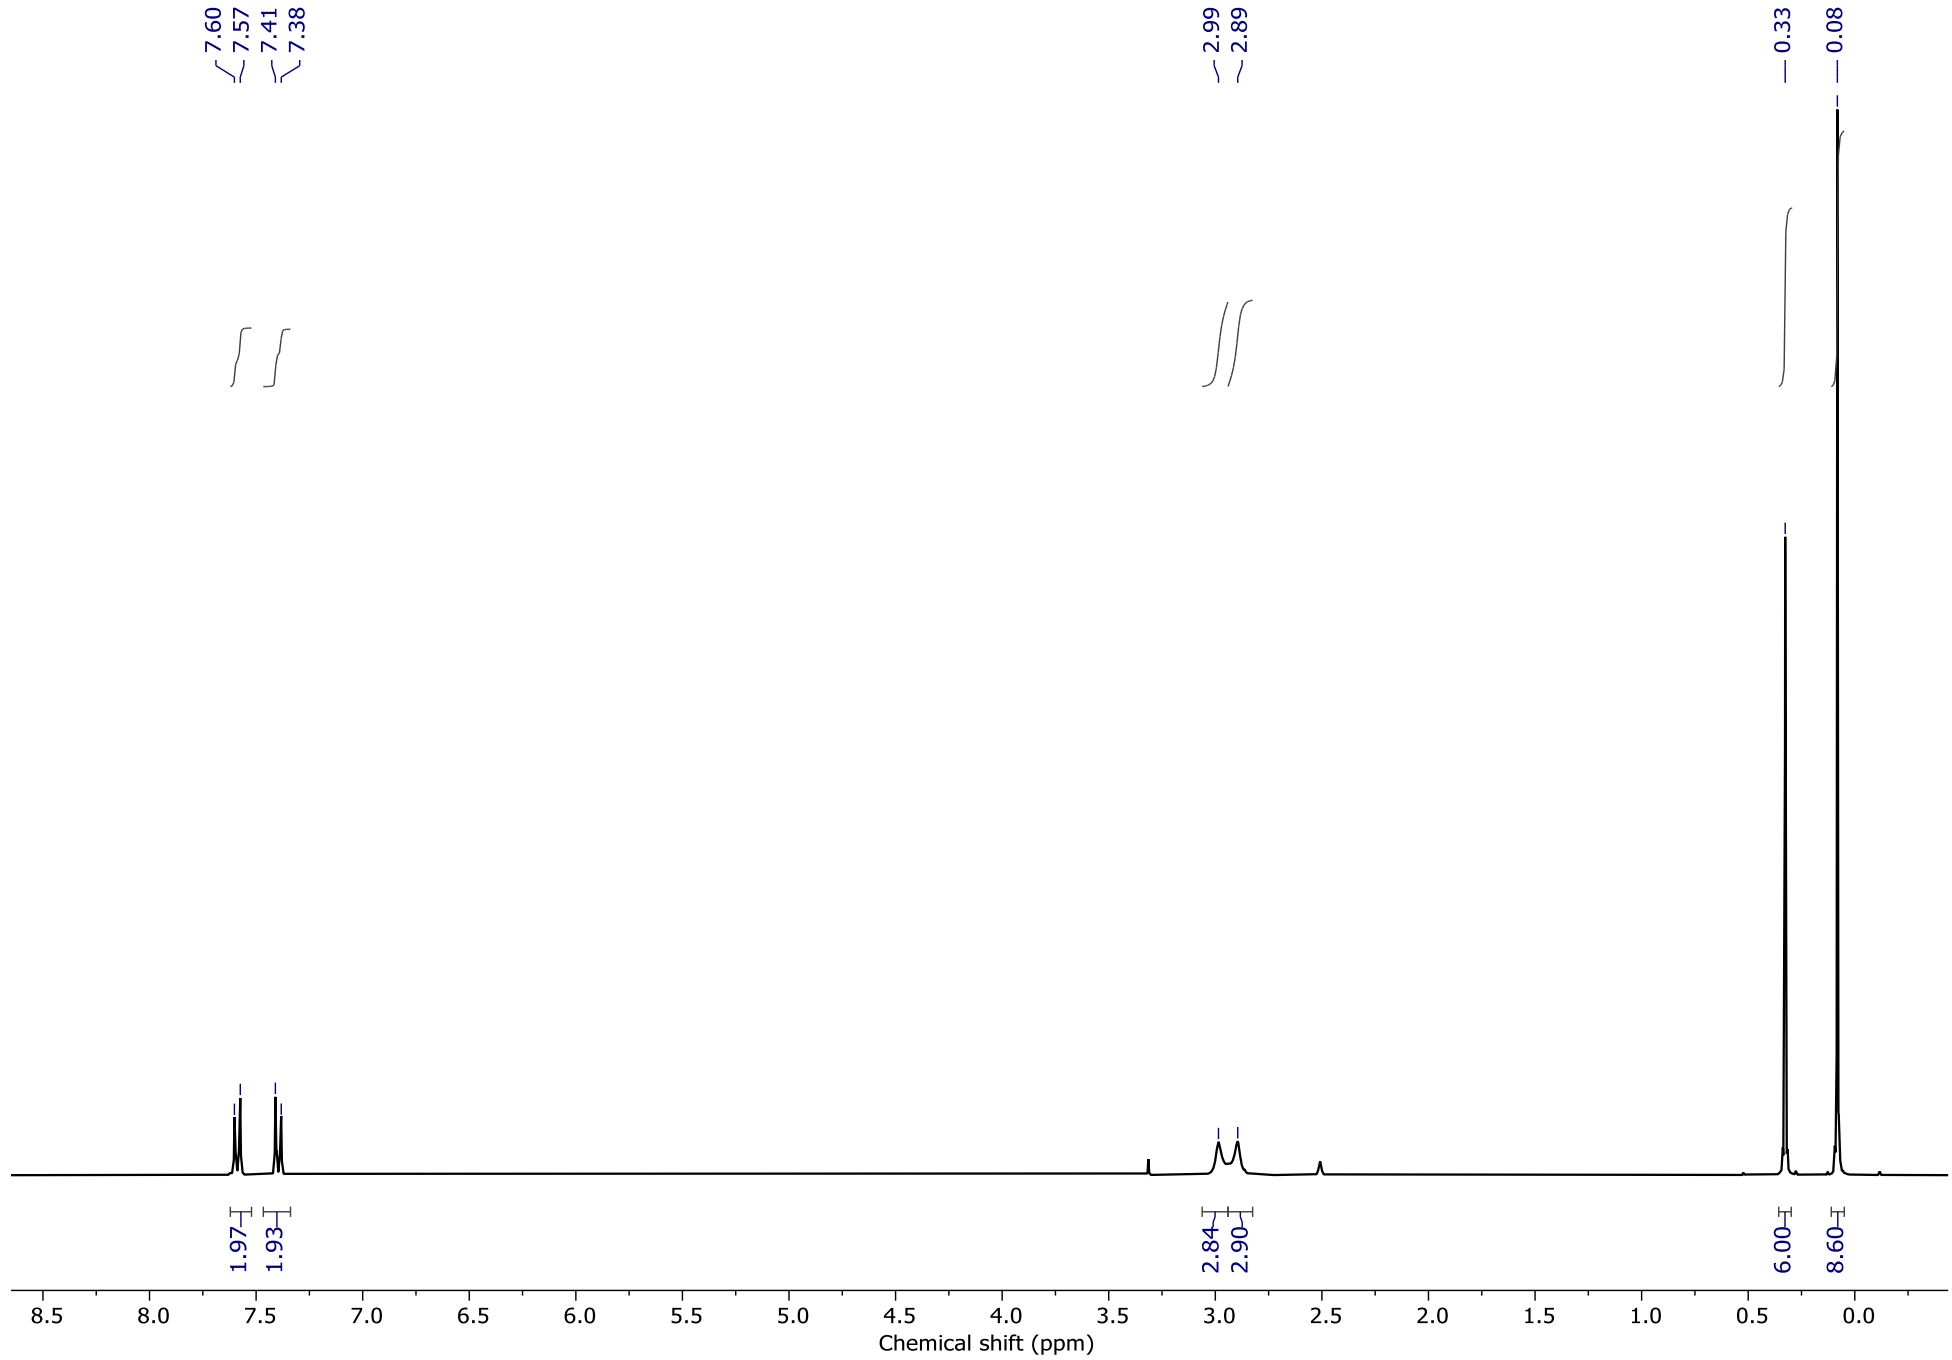

<sup>13</sup>C NMR

(100 MHz, DMSO-d6)

S100

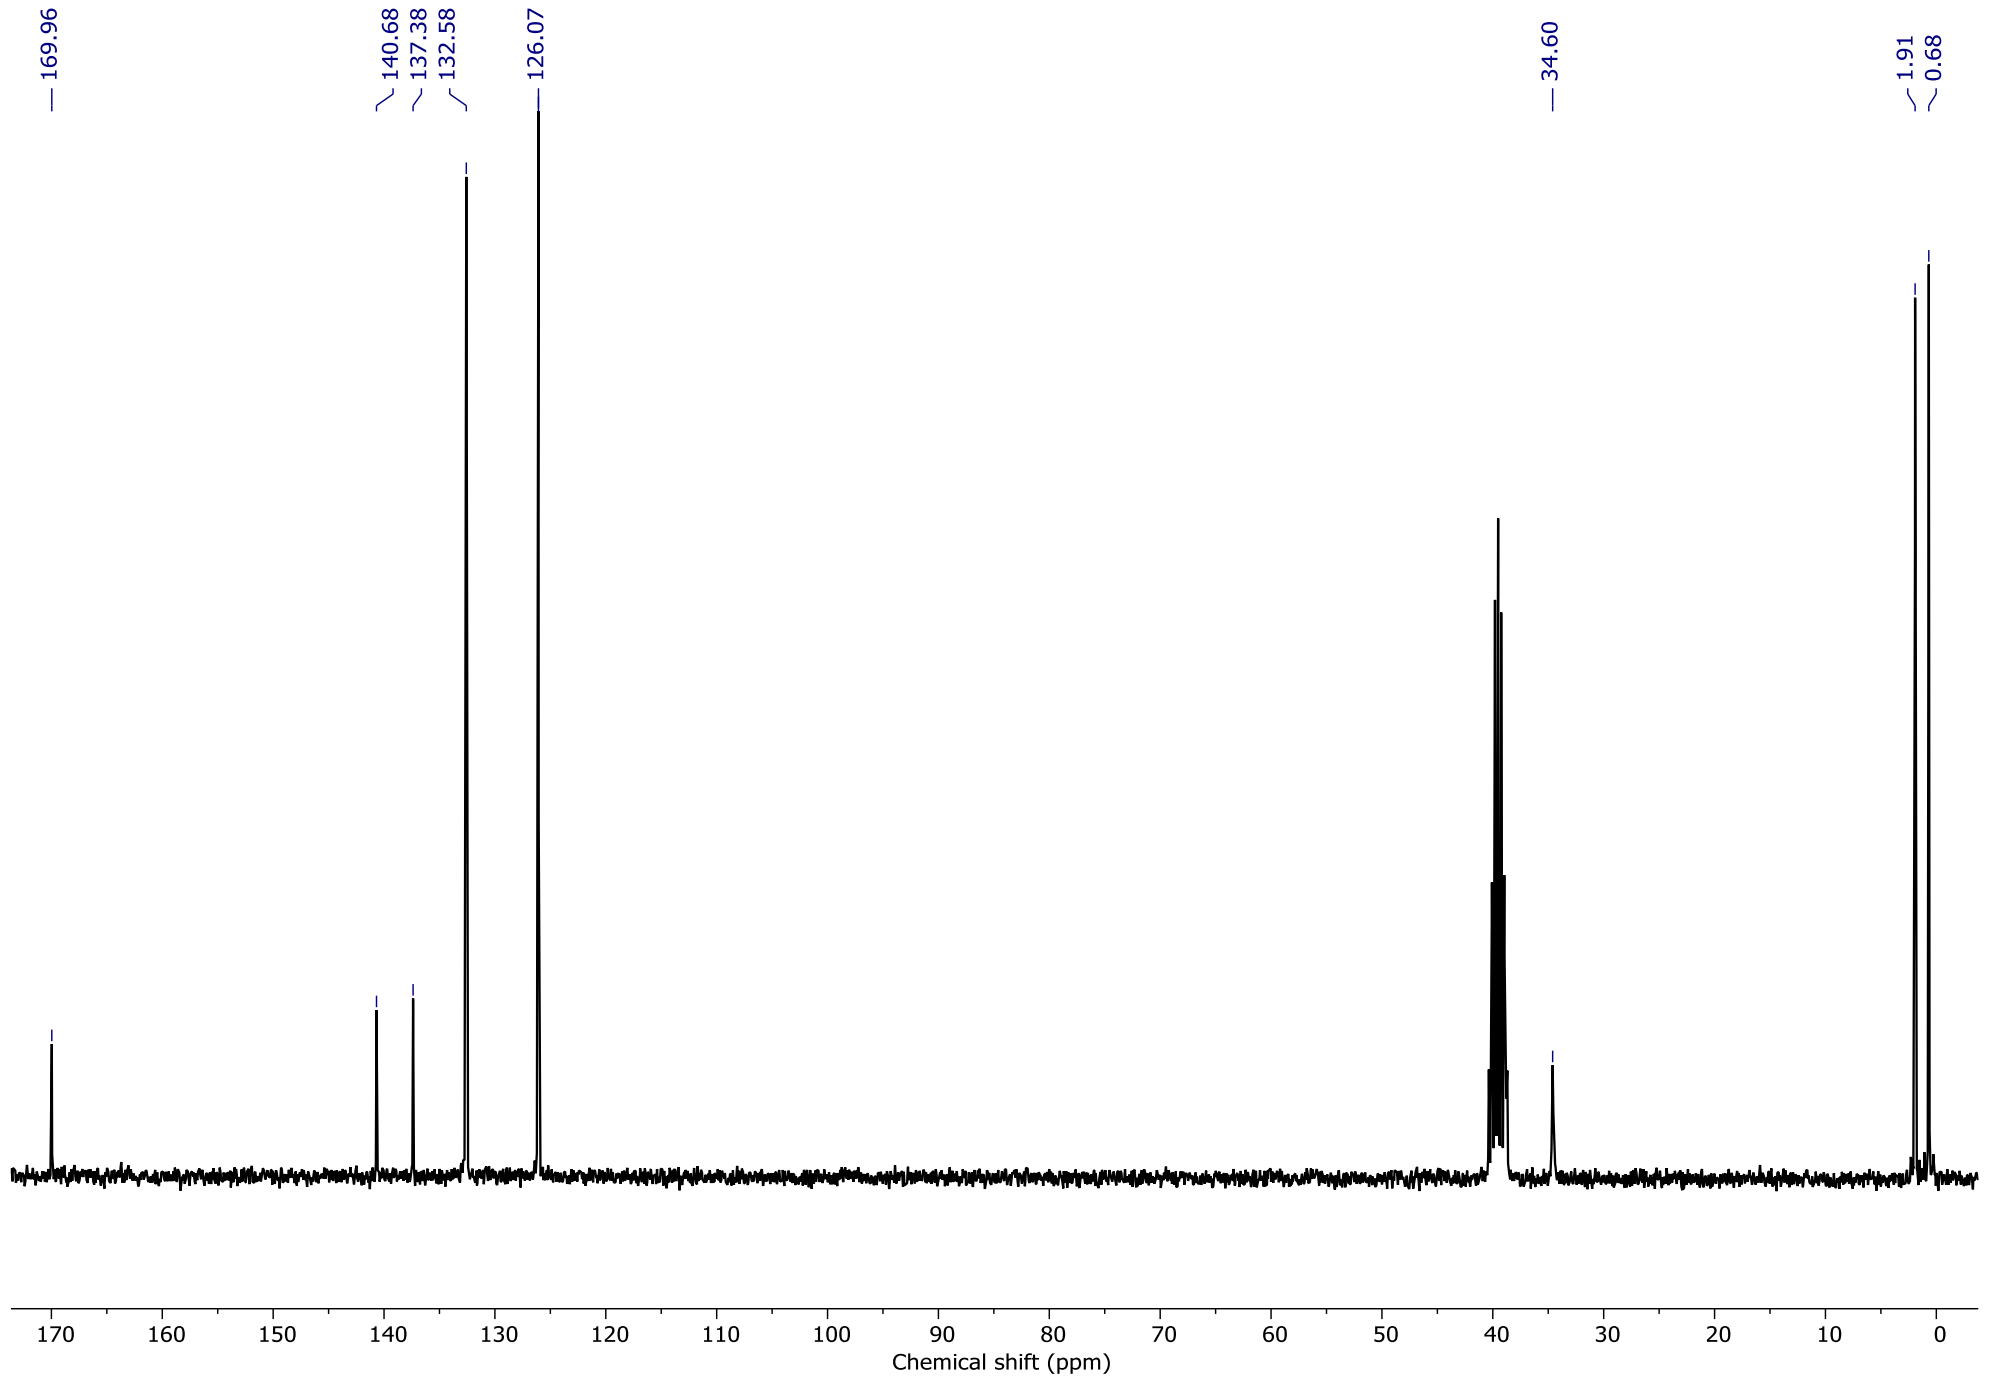

$^{29}\text{Si}$  NMR  
(80 MHz, DMSO-d6)

S101

— 9.15  
- - - 2.10

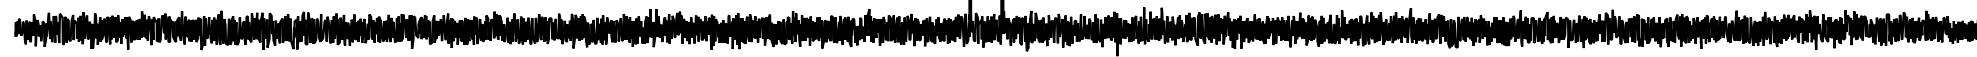

300 250 200 150 100 50 0 -50 -100 -150 -200 -250 -300

Chemical shift (ppm)

S102

$^1\text{H} - ^{13}\text{C}$  HMBC  
(400 MHz, DMSO-d6)

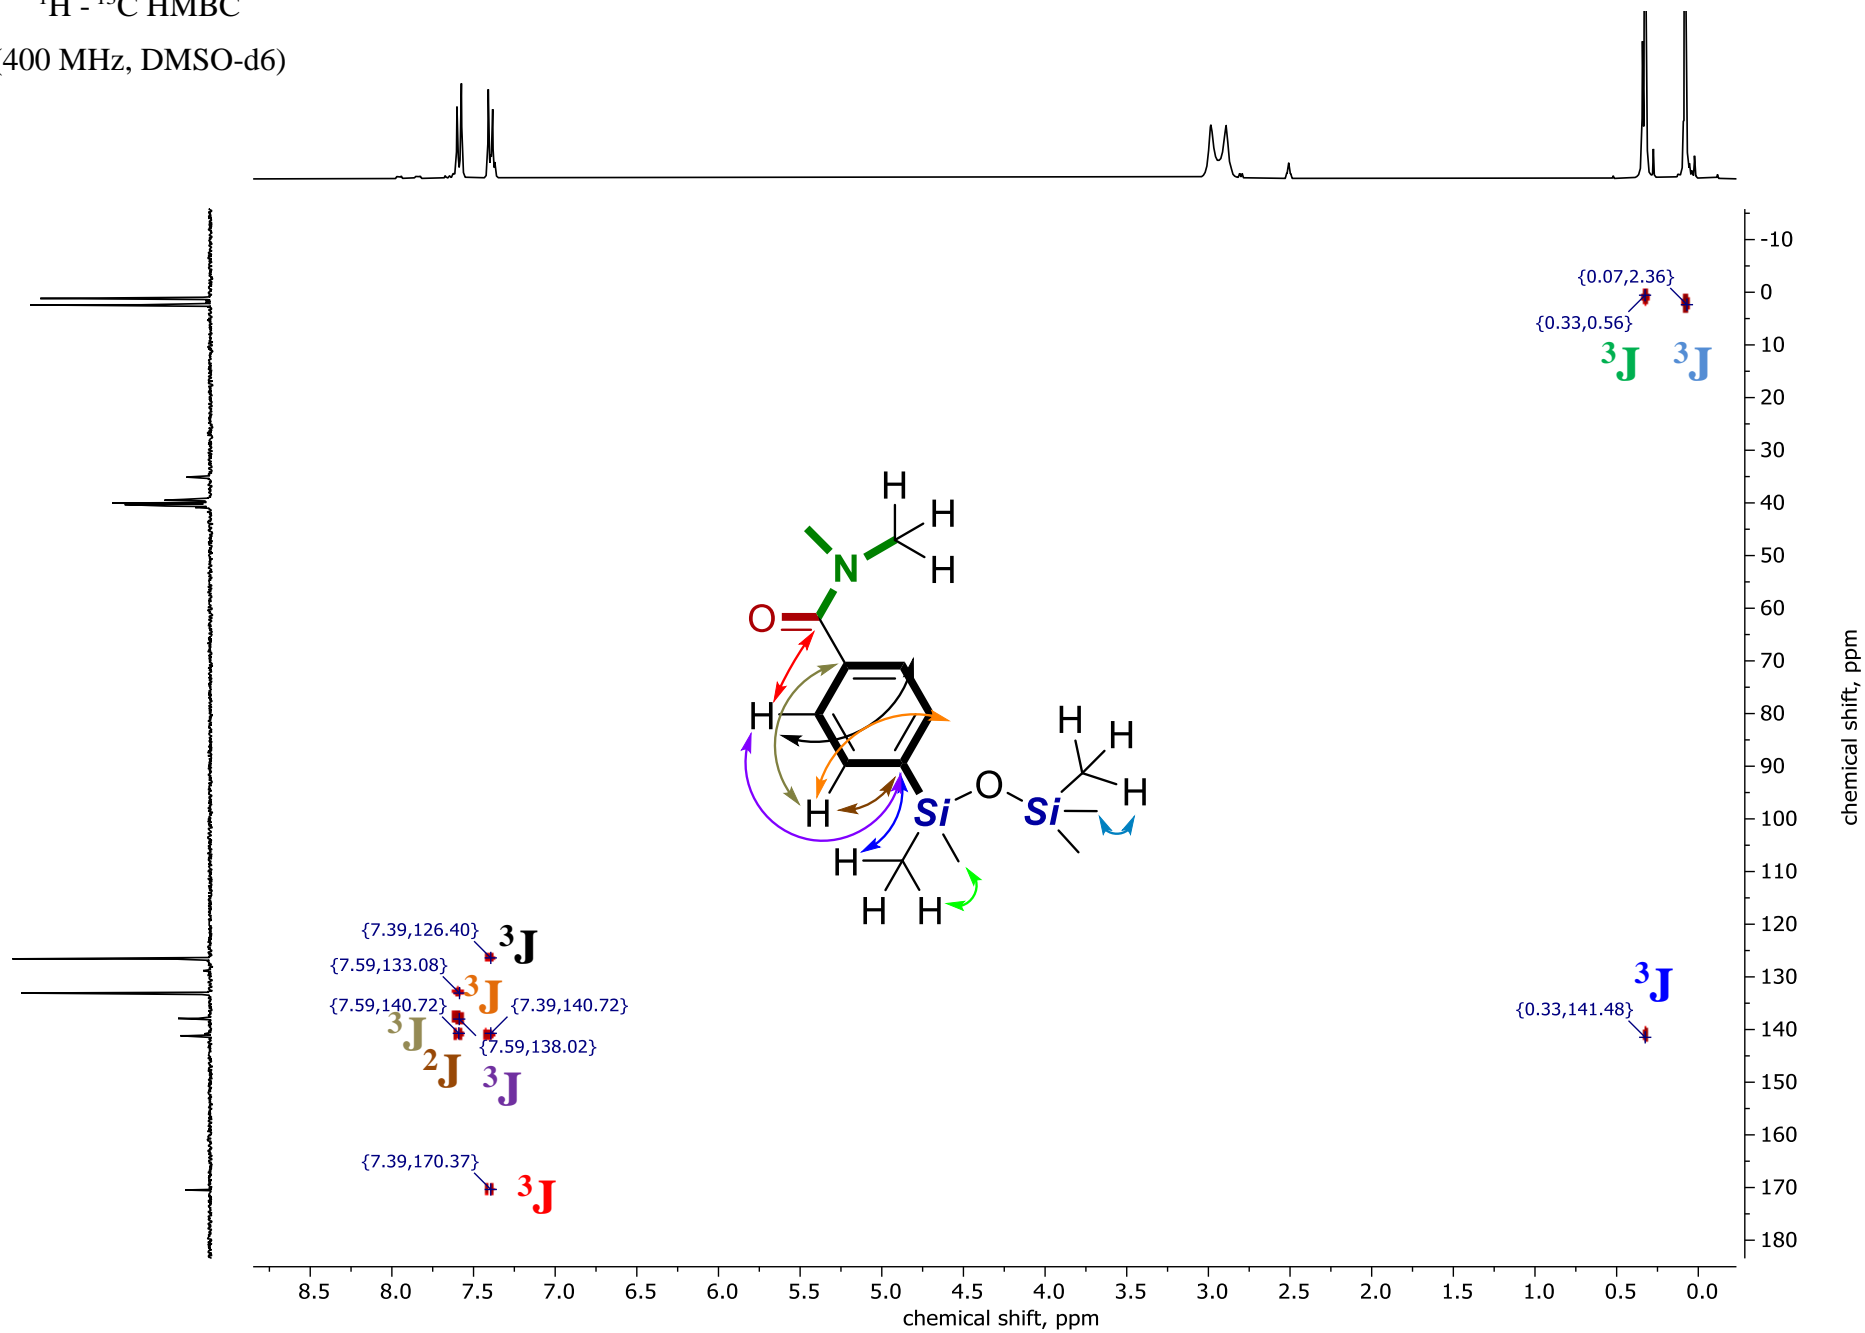

$^1\text{H} - ^{13}\text{C}$  HSQC  
(400 MHz, DMSO-d<sub>6</sub>)

S103

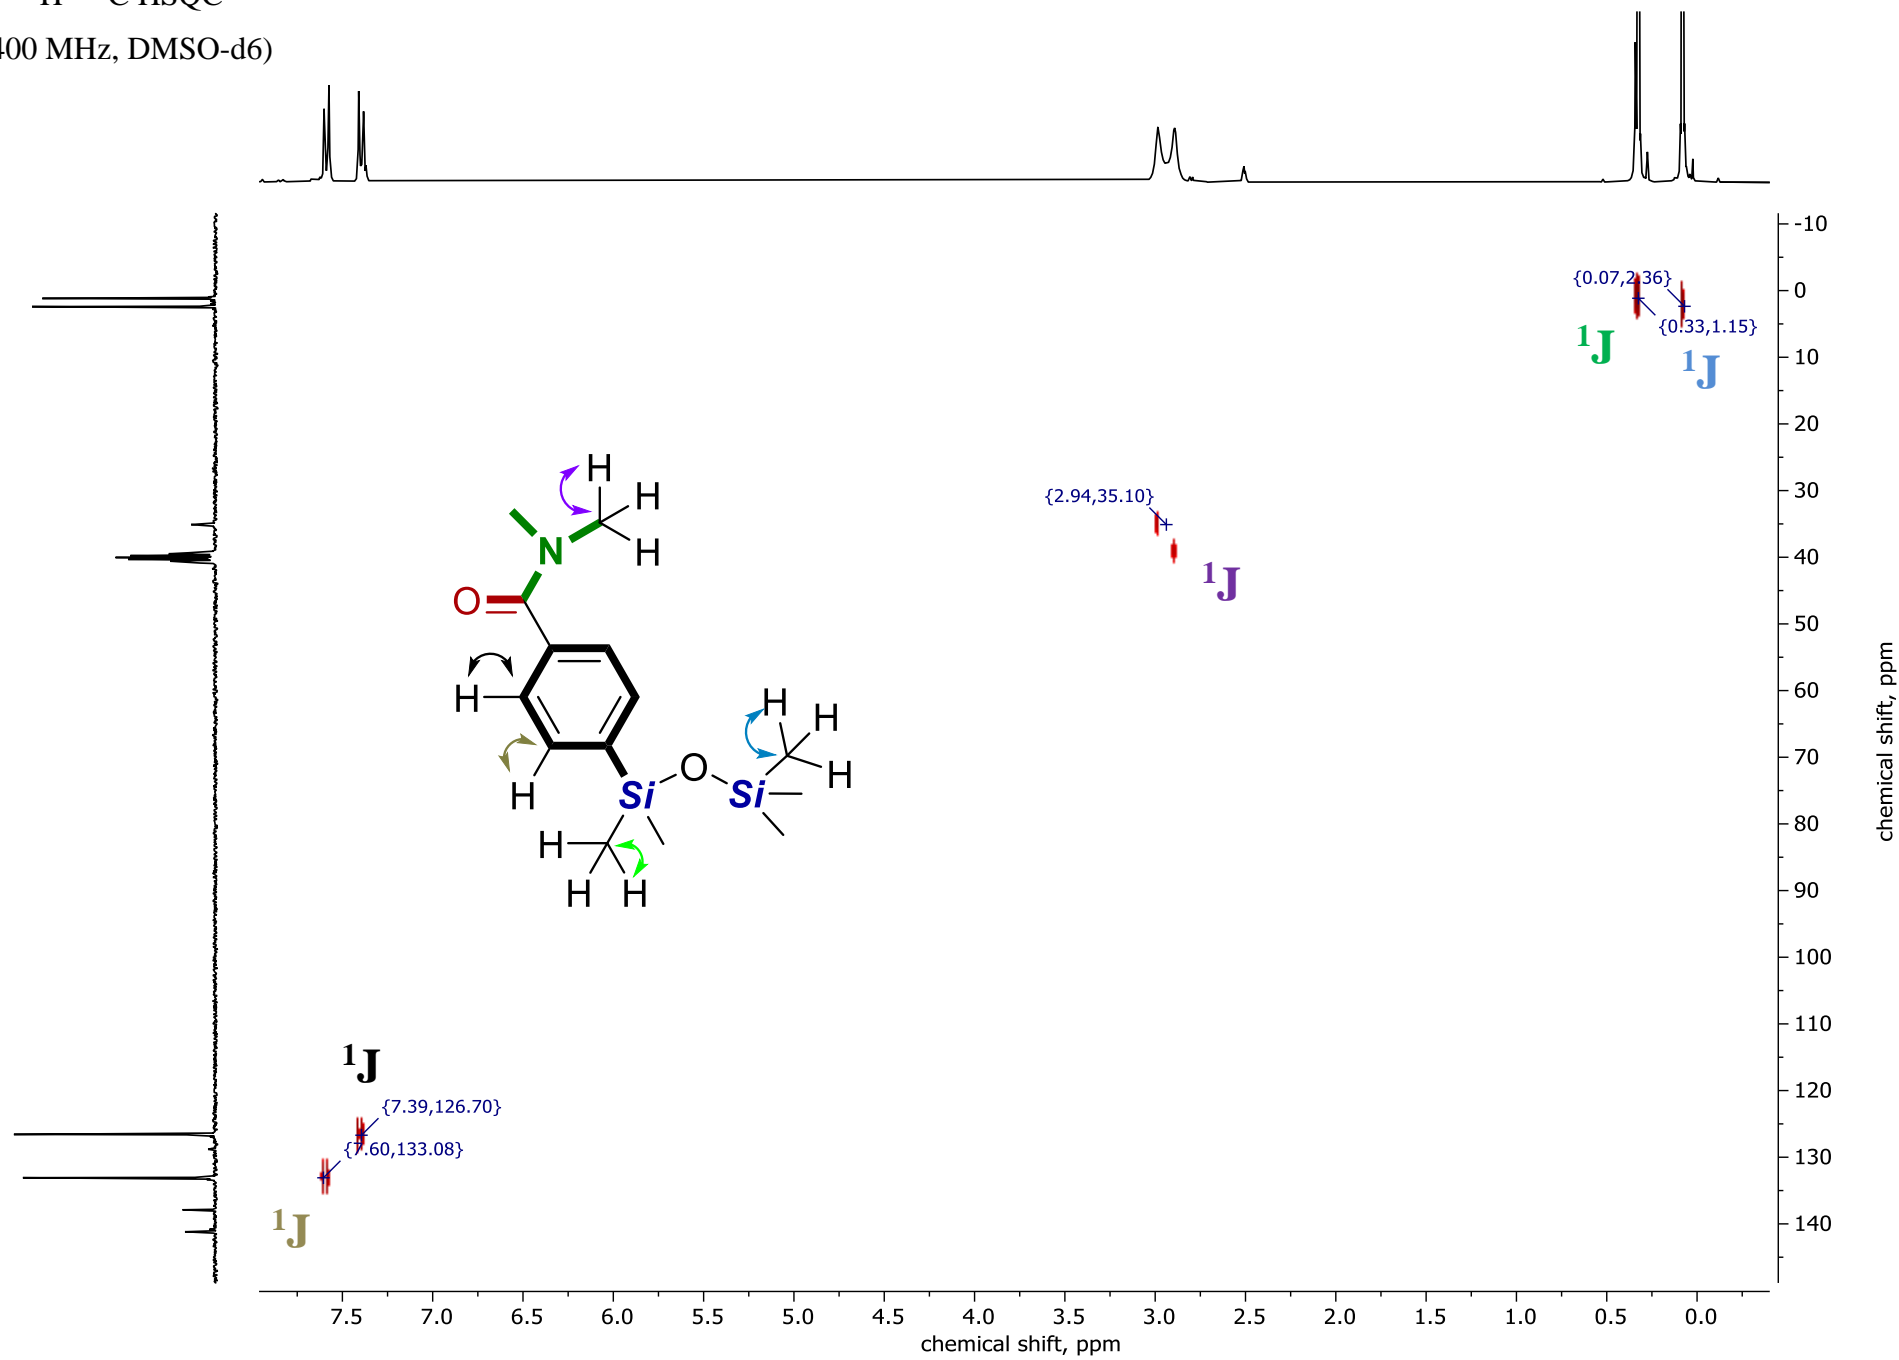

$^1\text{H} - ^{29}\text{Si}$  HMBC  
(400 MHz, DMSO-d<sub>6</sub>)

S104

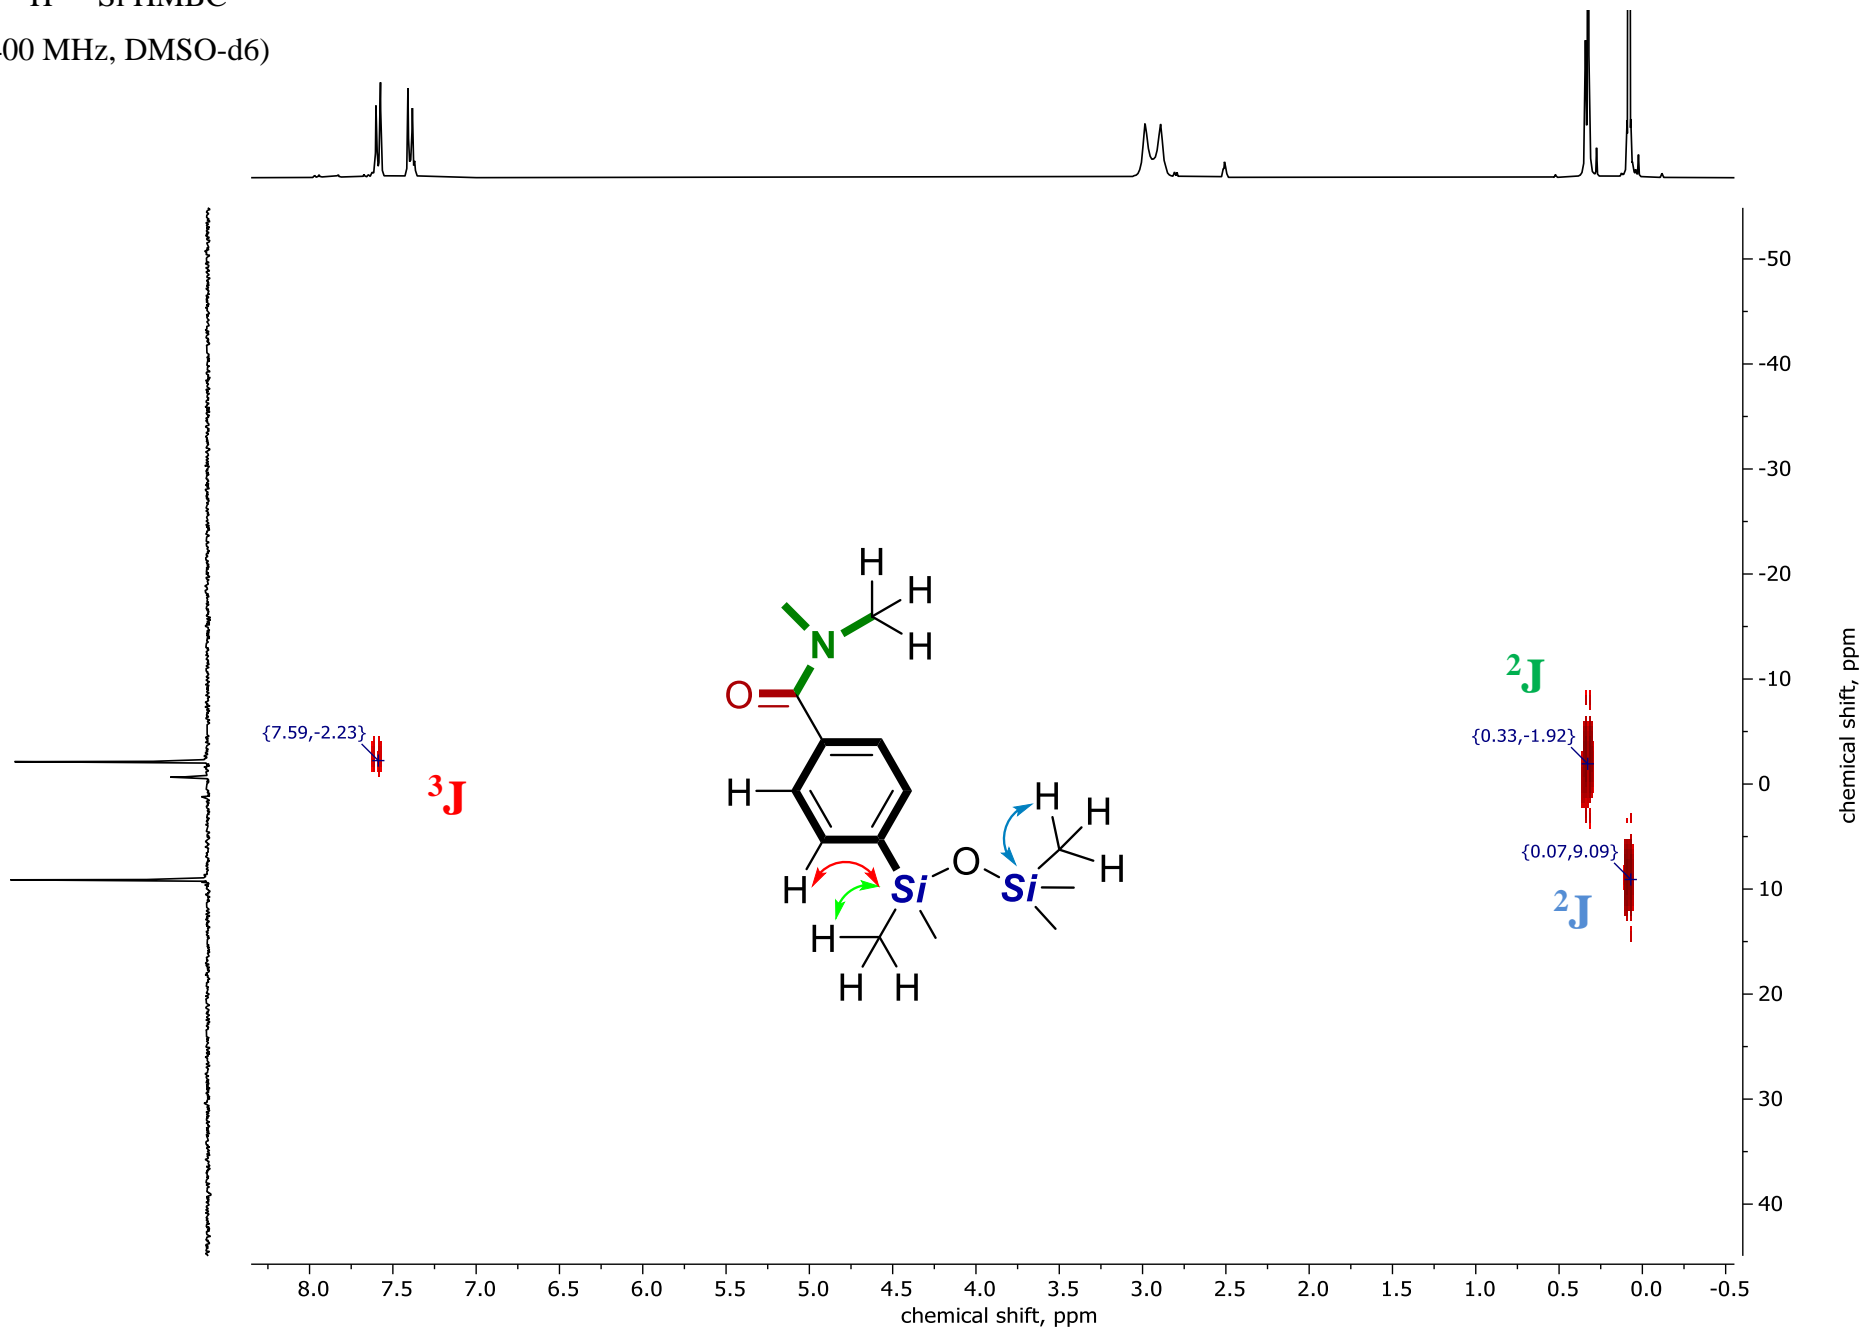



IR spectrum

S105

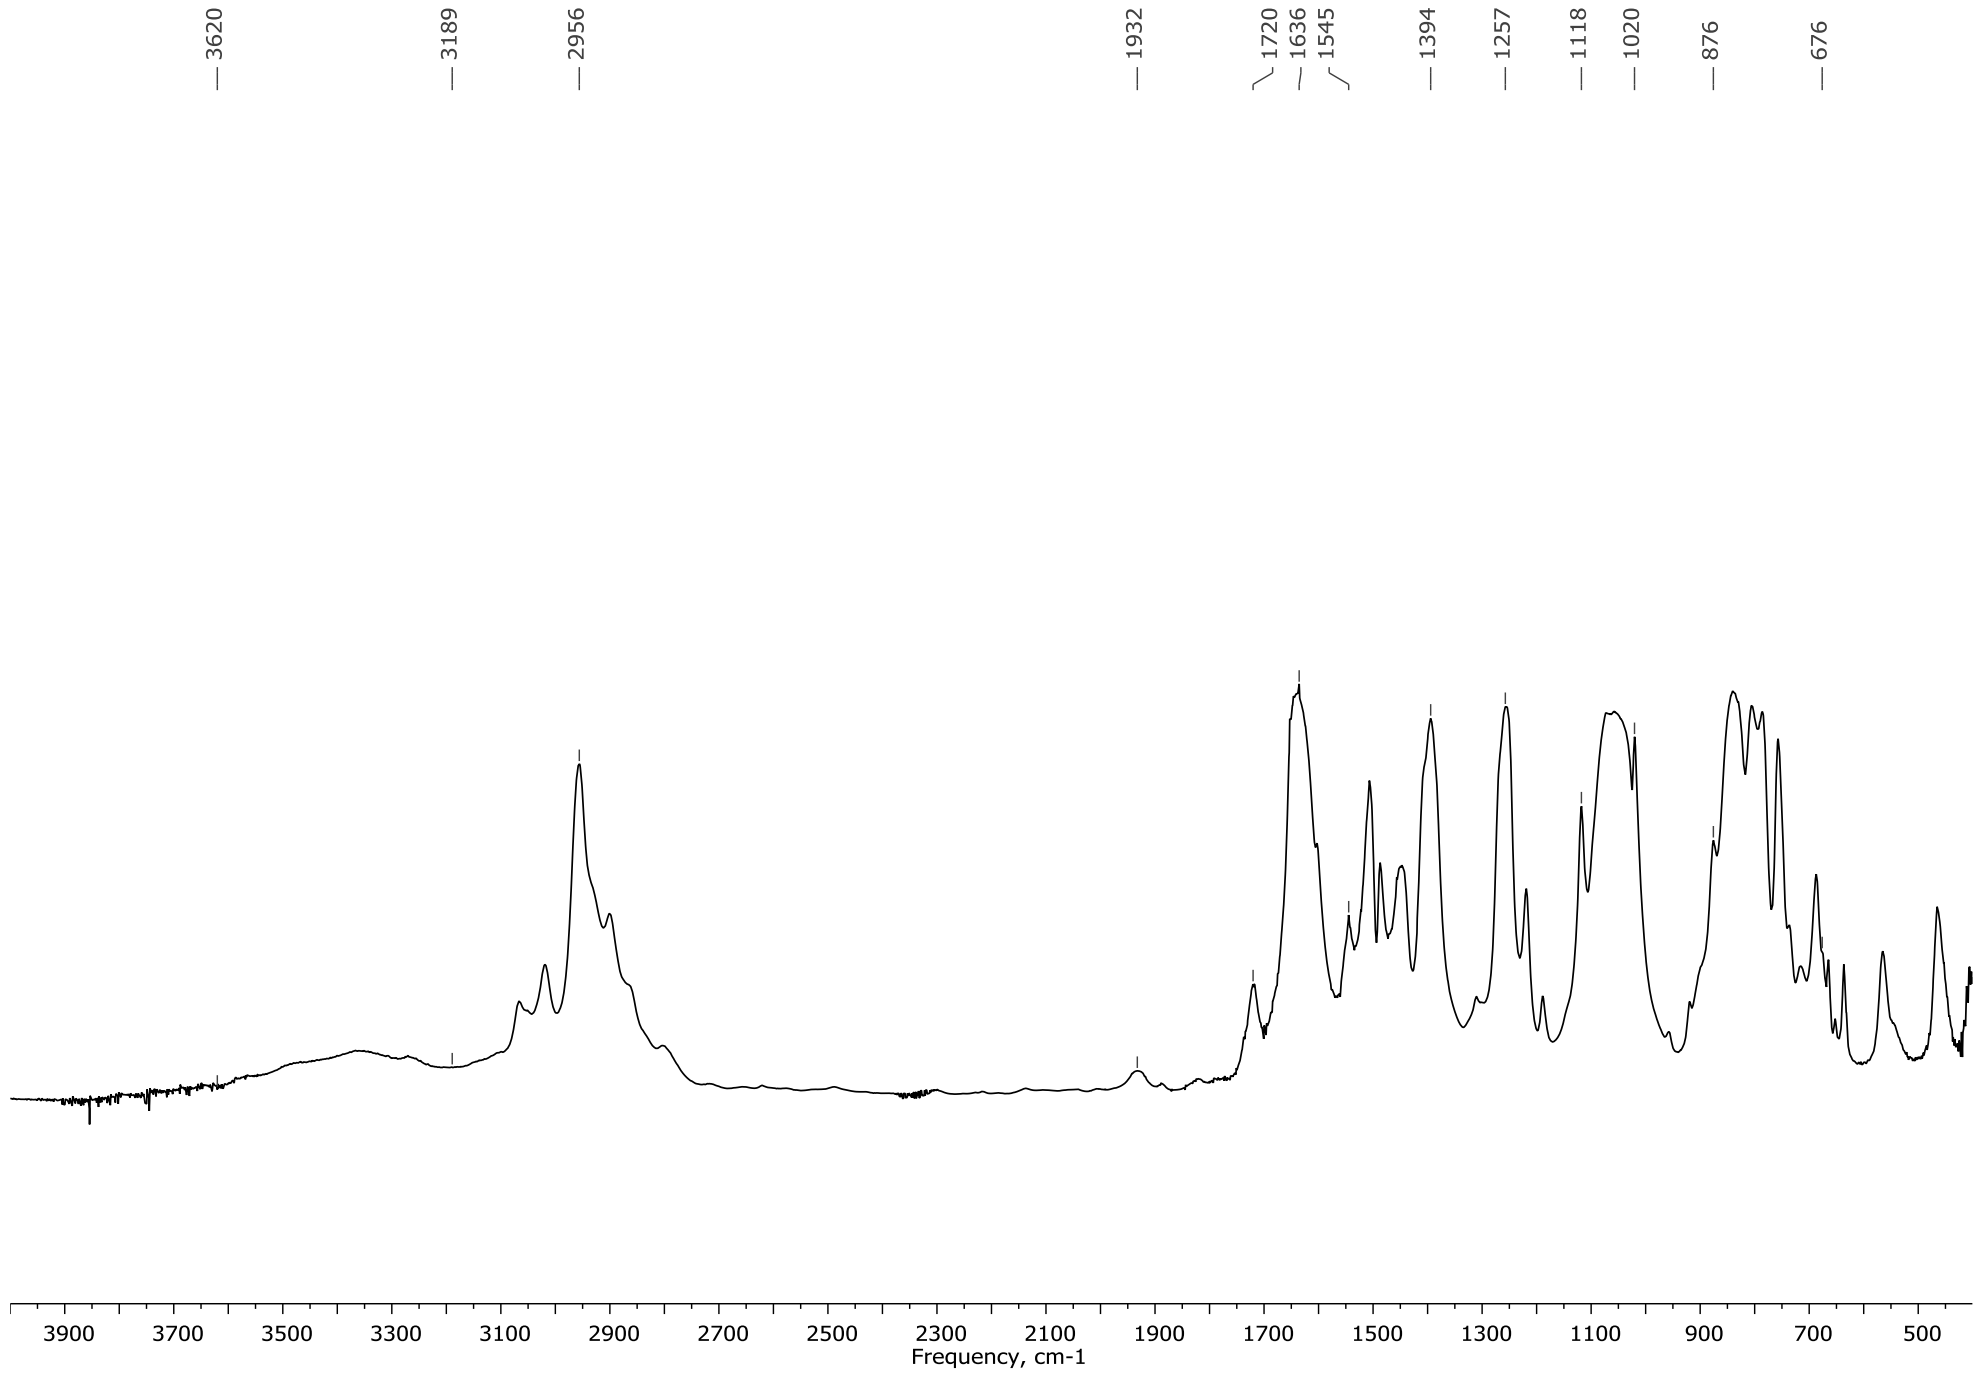

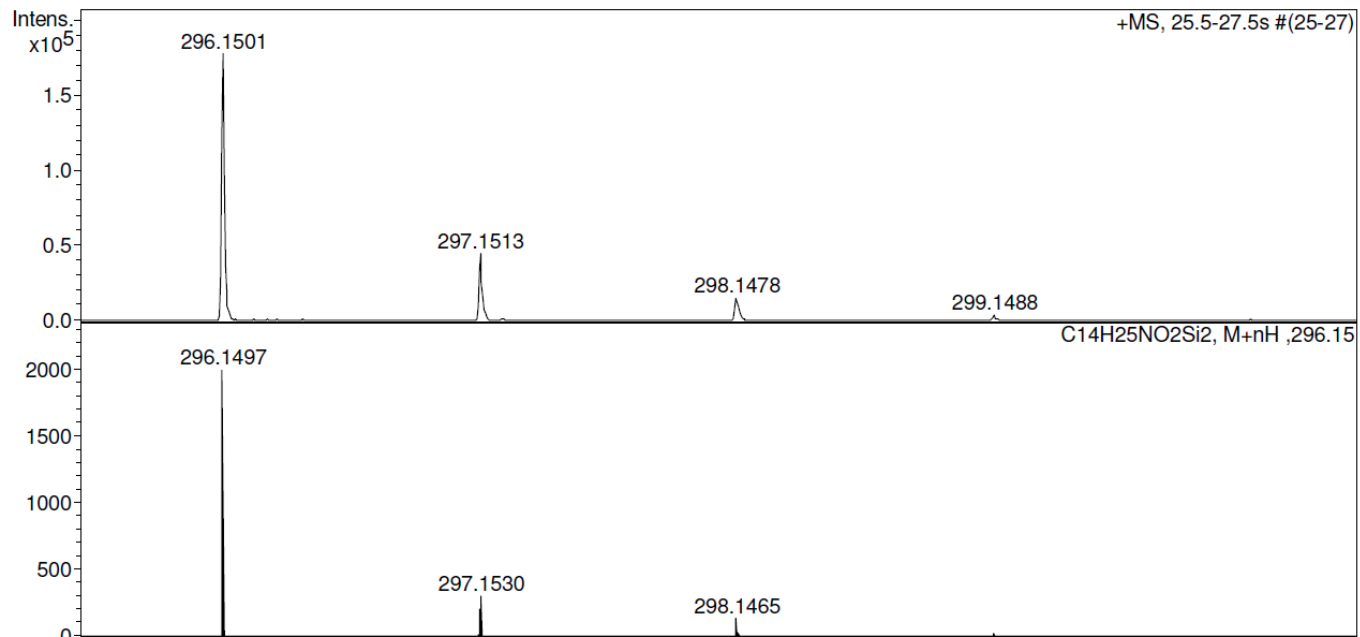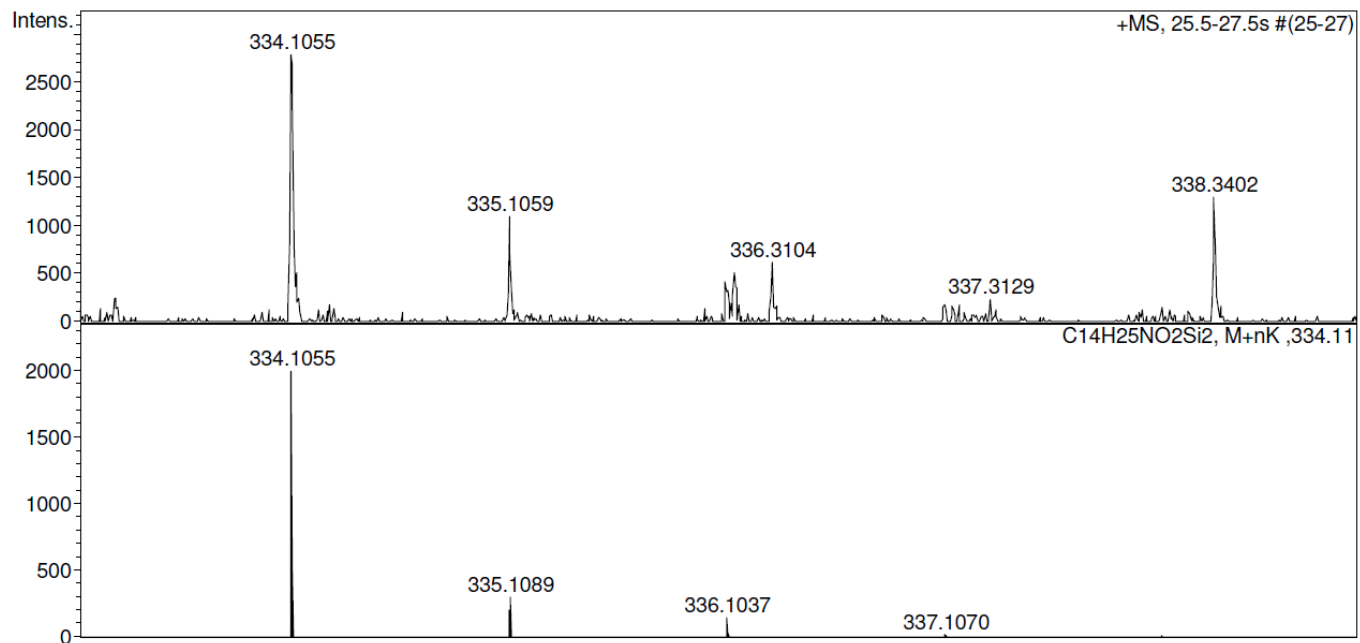

S107

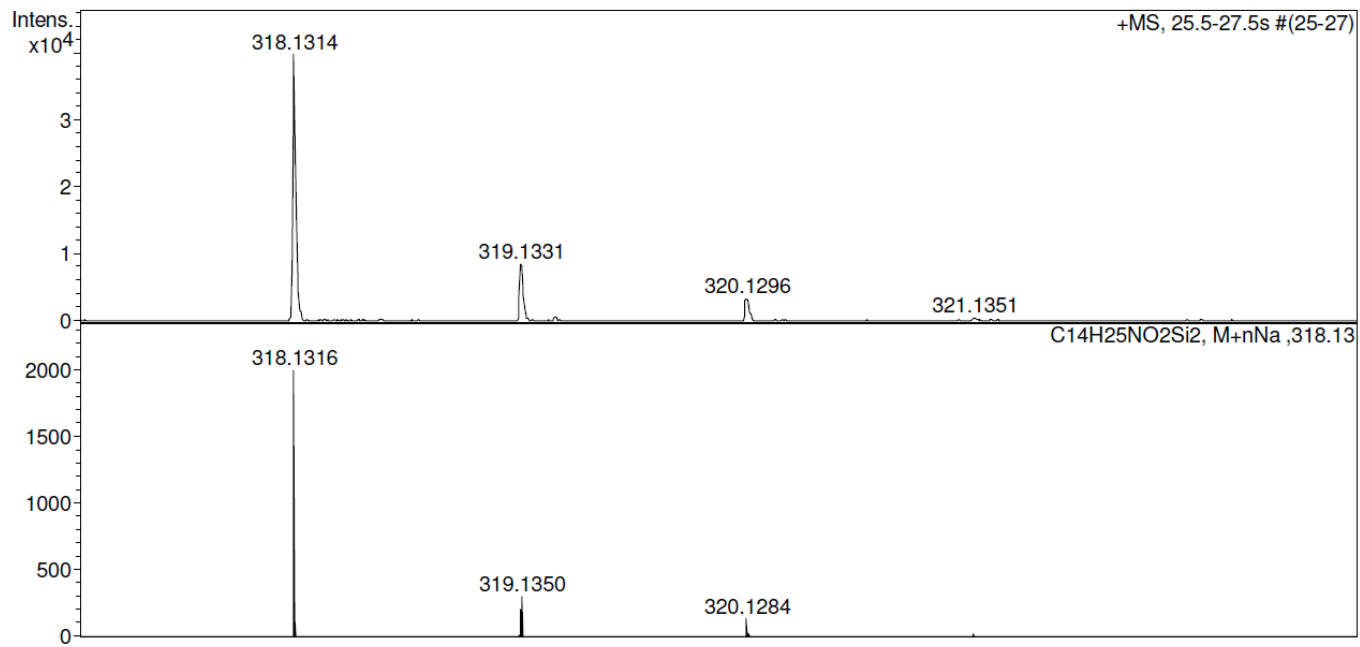

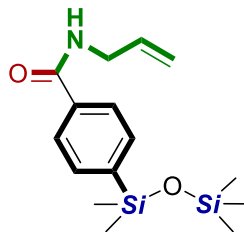

**Characterisation data for N-allyl-4-(1,1,3,3,3-pentamethyldisiloxanyl)benzamide:**

$^1\text{H}$  NMR (400 MHz, DMSO):  $\delta$  = 8.66 (t,  $^3\text{J}=8$ , 1H),  $\delta$  = 7.88 (d,  $^3\text{J}=11$ , 2H),  $\delta$  = 7.62 (d,  $^3\text{J}=11$ , 2H),  $\delta$  = 5.97-5.84 (m, 1H),  $\delta$  = 5.21-5.07 (m, 2H),  $\delta$  = 3.92 (m, 2H),  $\delta$  = 0.33 (s, 6H),  $\delta$  = 0.08 (s, 9H).  $^{13}\text{C}$  NMR (100 MHz, DMSO):  $\delta$  = 165.99, 142.83, 135.38, 135.21, 132.62, 126.36, 115.00, 41.46, 1.90, 0.66.  $^{29}\text{Si}$  NMR (80 MHz, DMSO):  $\delta$  = 9.17, -2.08.  $^{15}\text{N}$  NMR (40 MHz, DMSO):  $\delta$  = 109.66. HRMS (ESI)  $m/z$   $[\text{M} + \text{H}]^+$ : calcd for  $[\text{C}_{15}\text{H}_{25}\text{NO}_2\text{Si}_2 + \text{H}]^+$ , 282.1340; found, 282.1351. IR ( $\text{cm}^{-1}$ ): 3574-3138, 2959, 1934, 1721, 1642, 1543, 1429, 1284, 1057, 920, 816-638.

<sup>1</sup>H NMR

(400 MHz, DMSO-d6)

S109

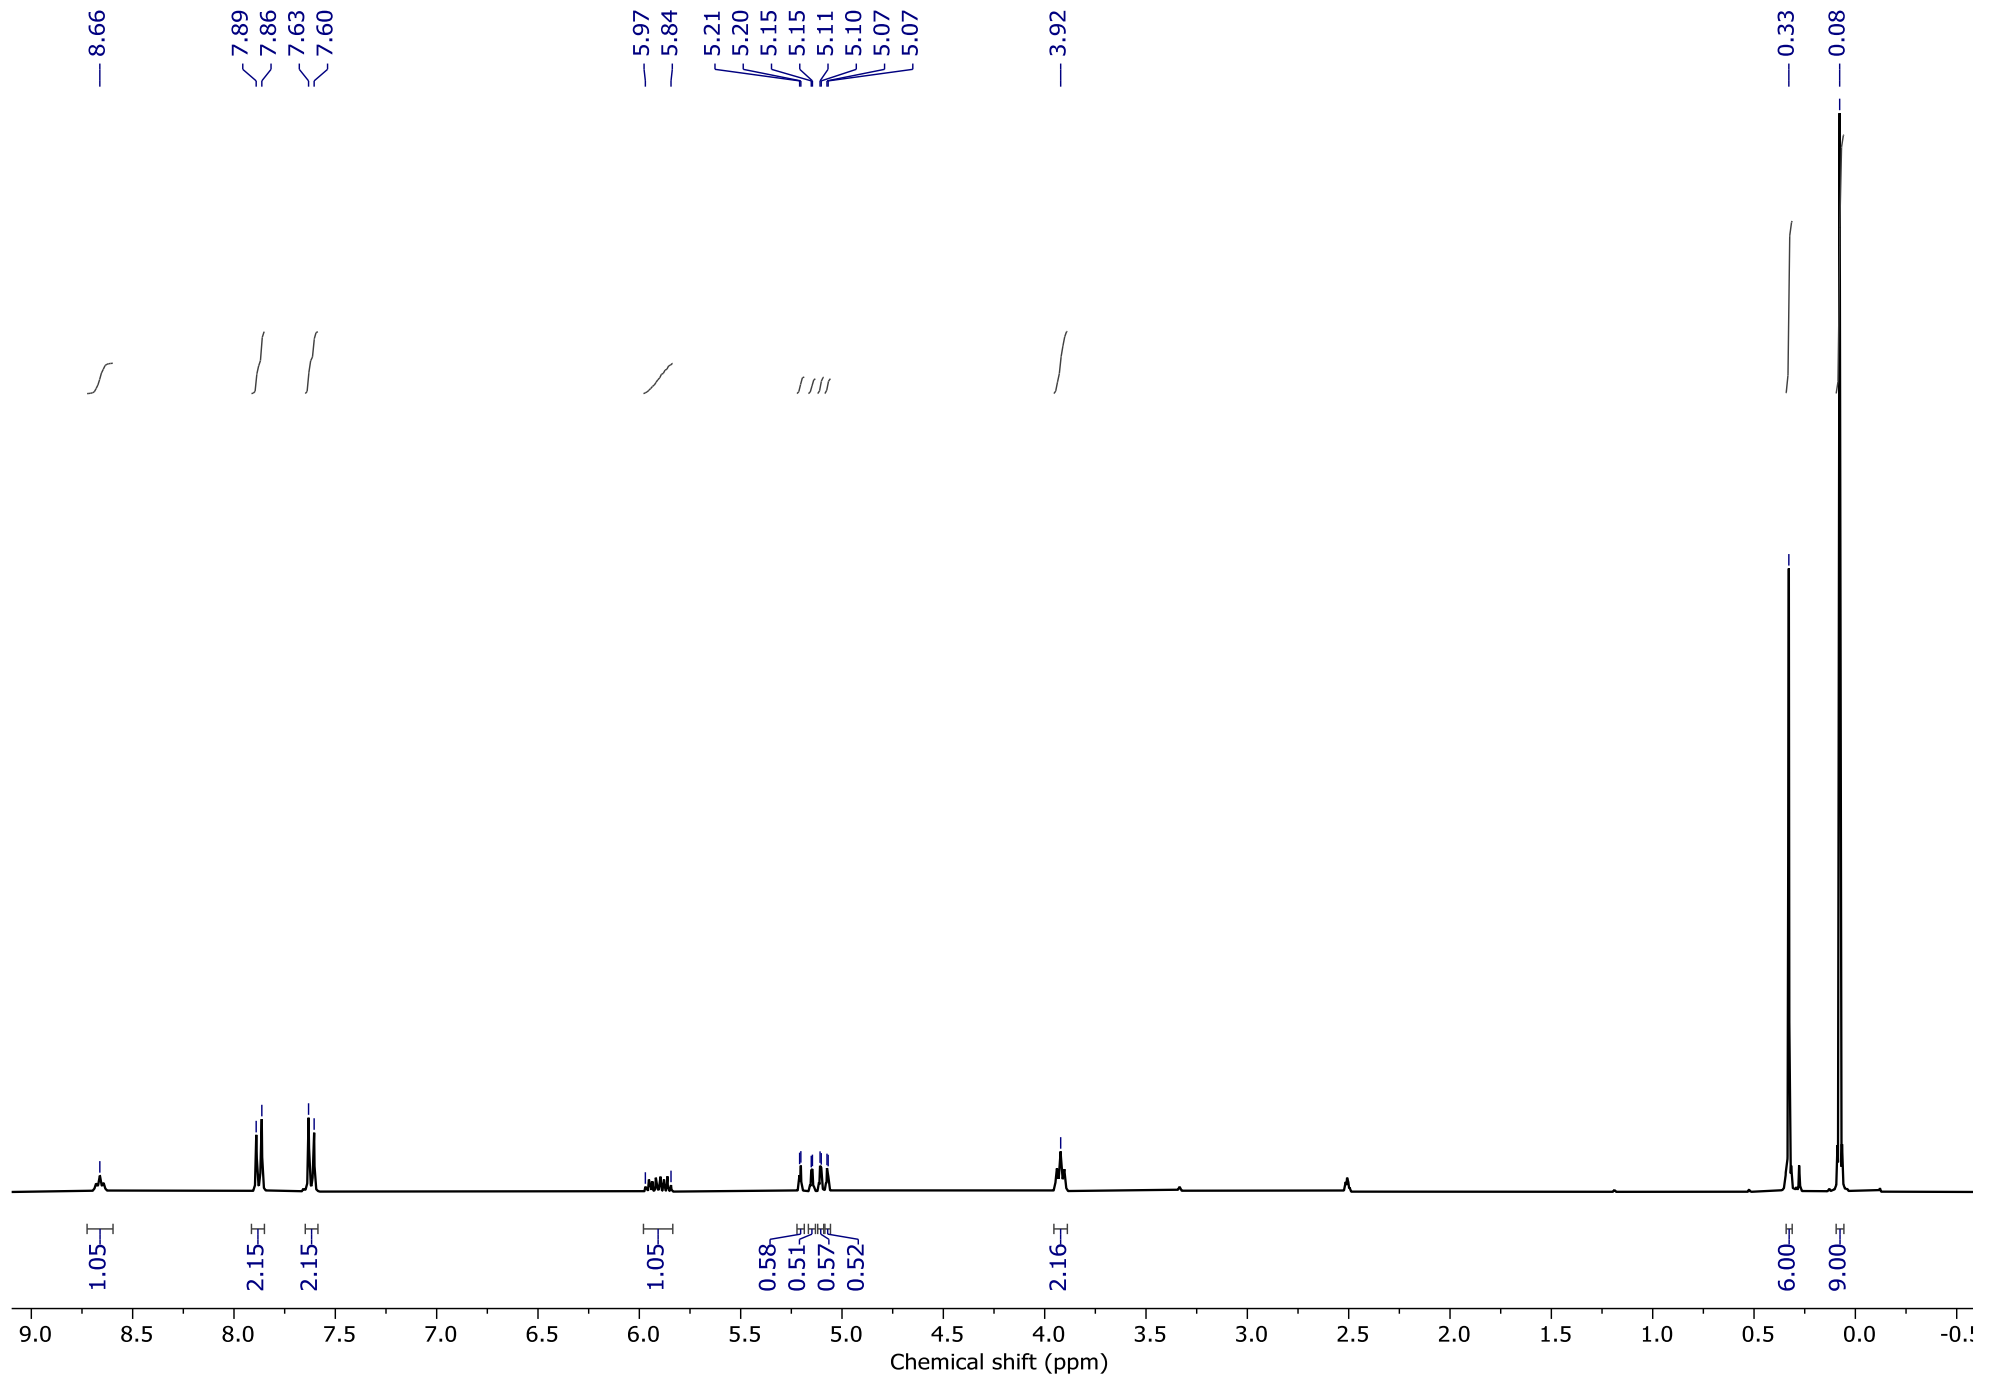

$^{13}\text{C}$  NMR

(100 MHz, DMSO-d<sub>6</sub>)

S110

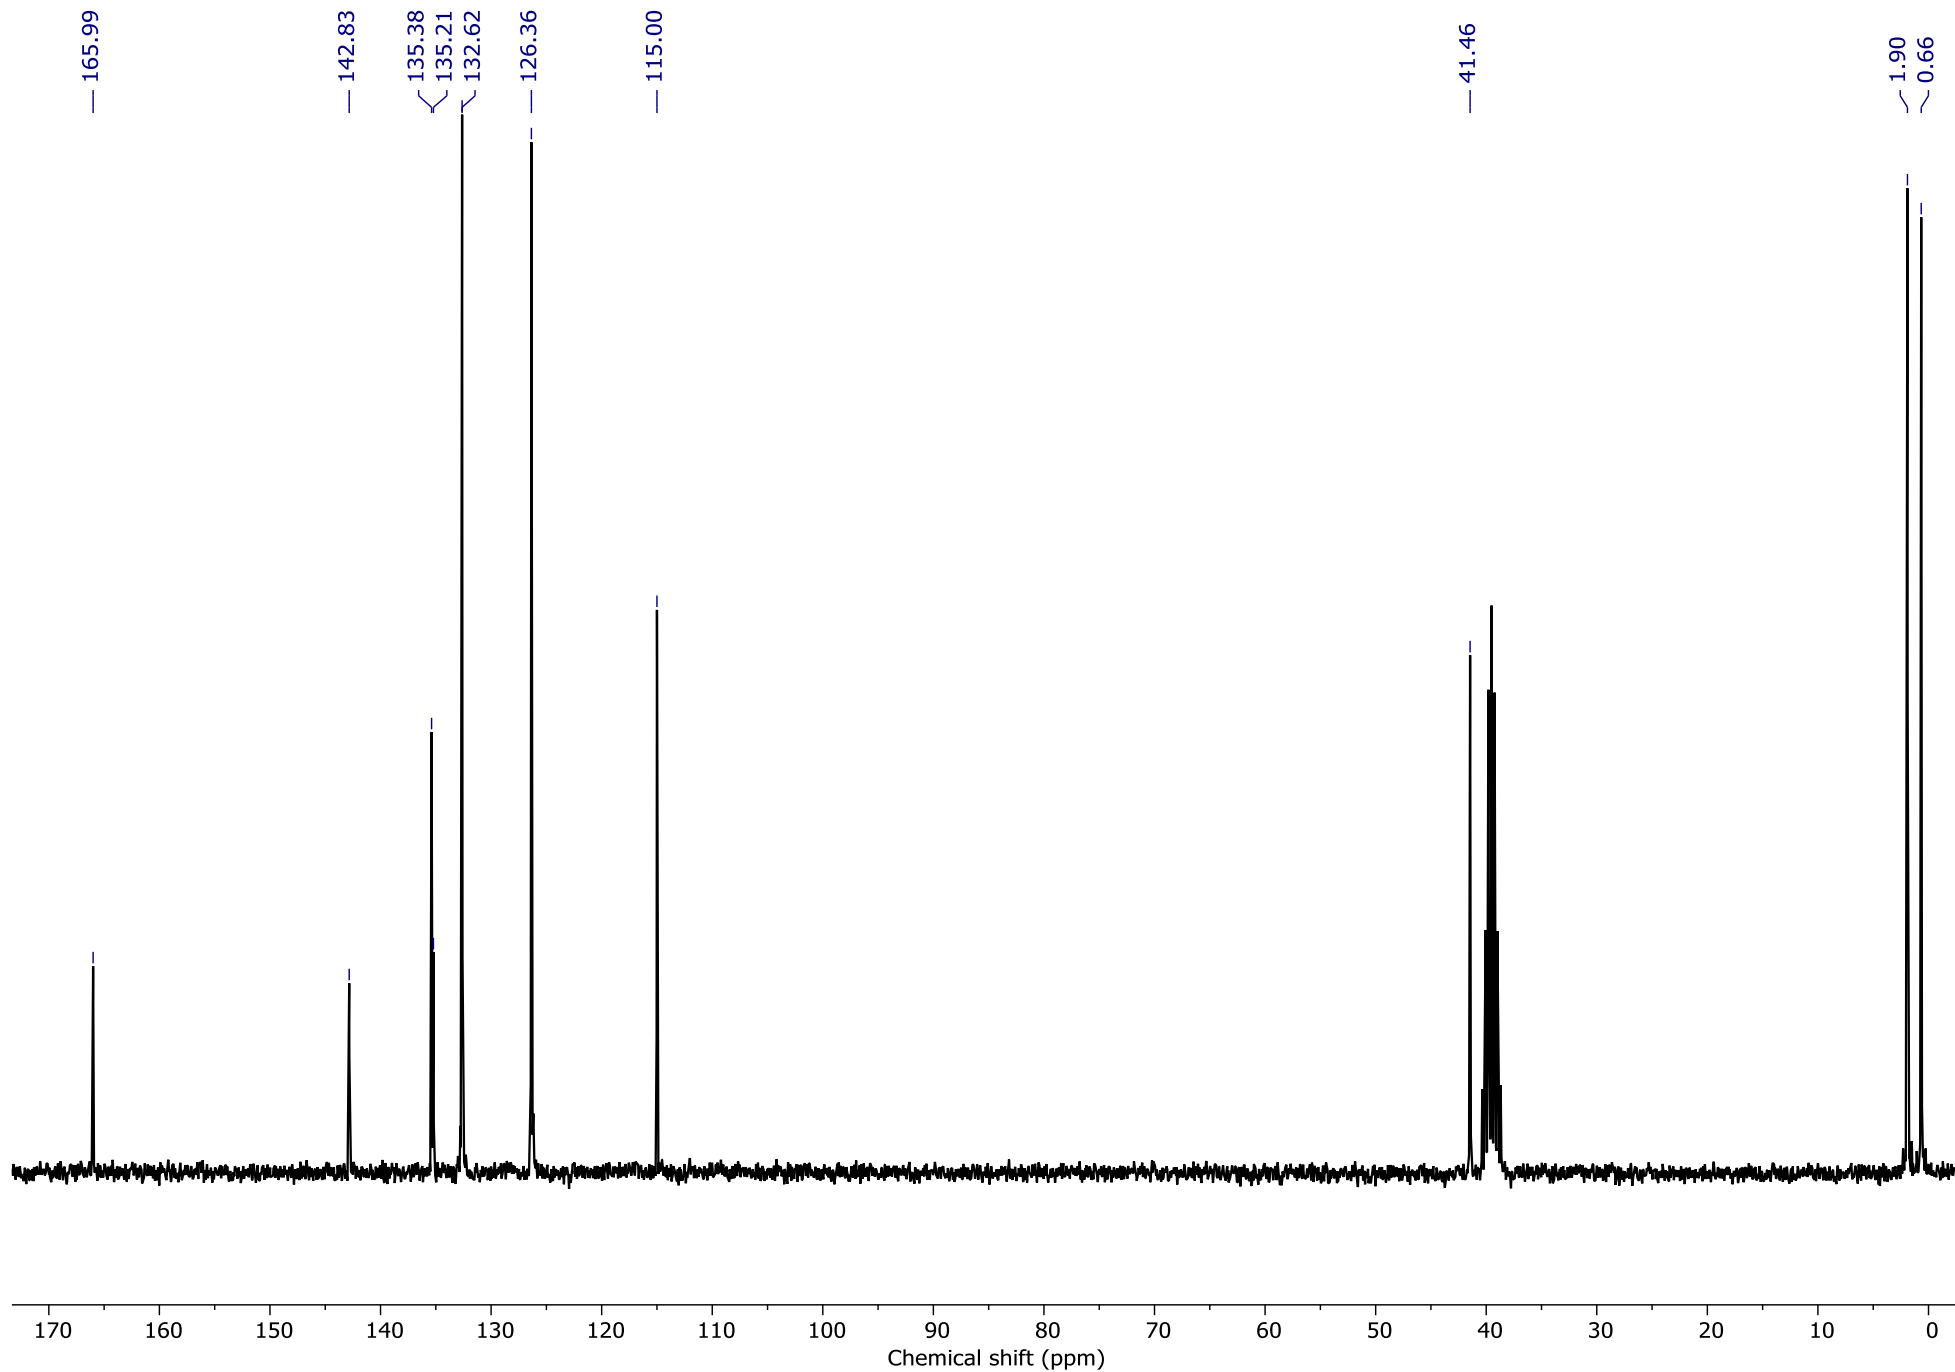

$^{29}\text{Si}$  NMR  
(80 MHz, DMSO-d<sub>6</sub>)

S111

9.17  
-2.08

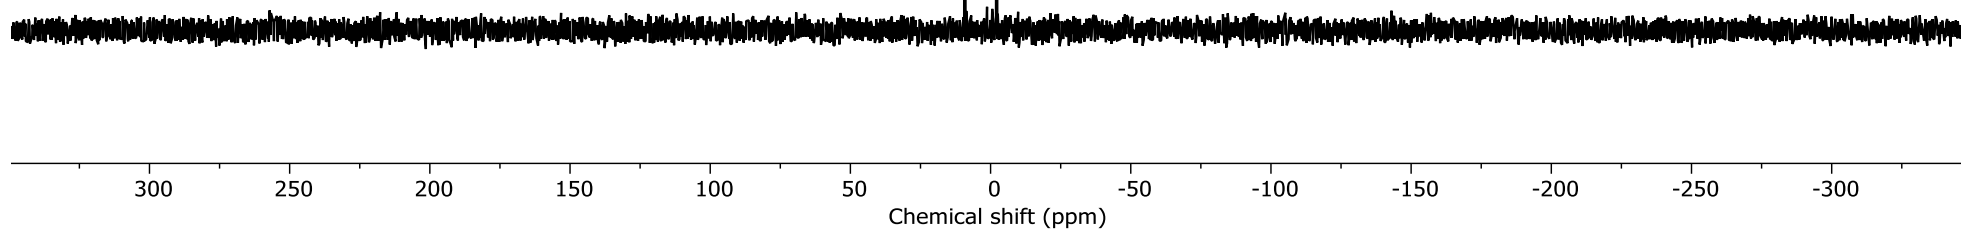

$^{15}\text{N}$  NMR  
(Reconstructed, 40 MHz,  
DMSO-d<sub>6</sub>)

S112

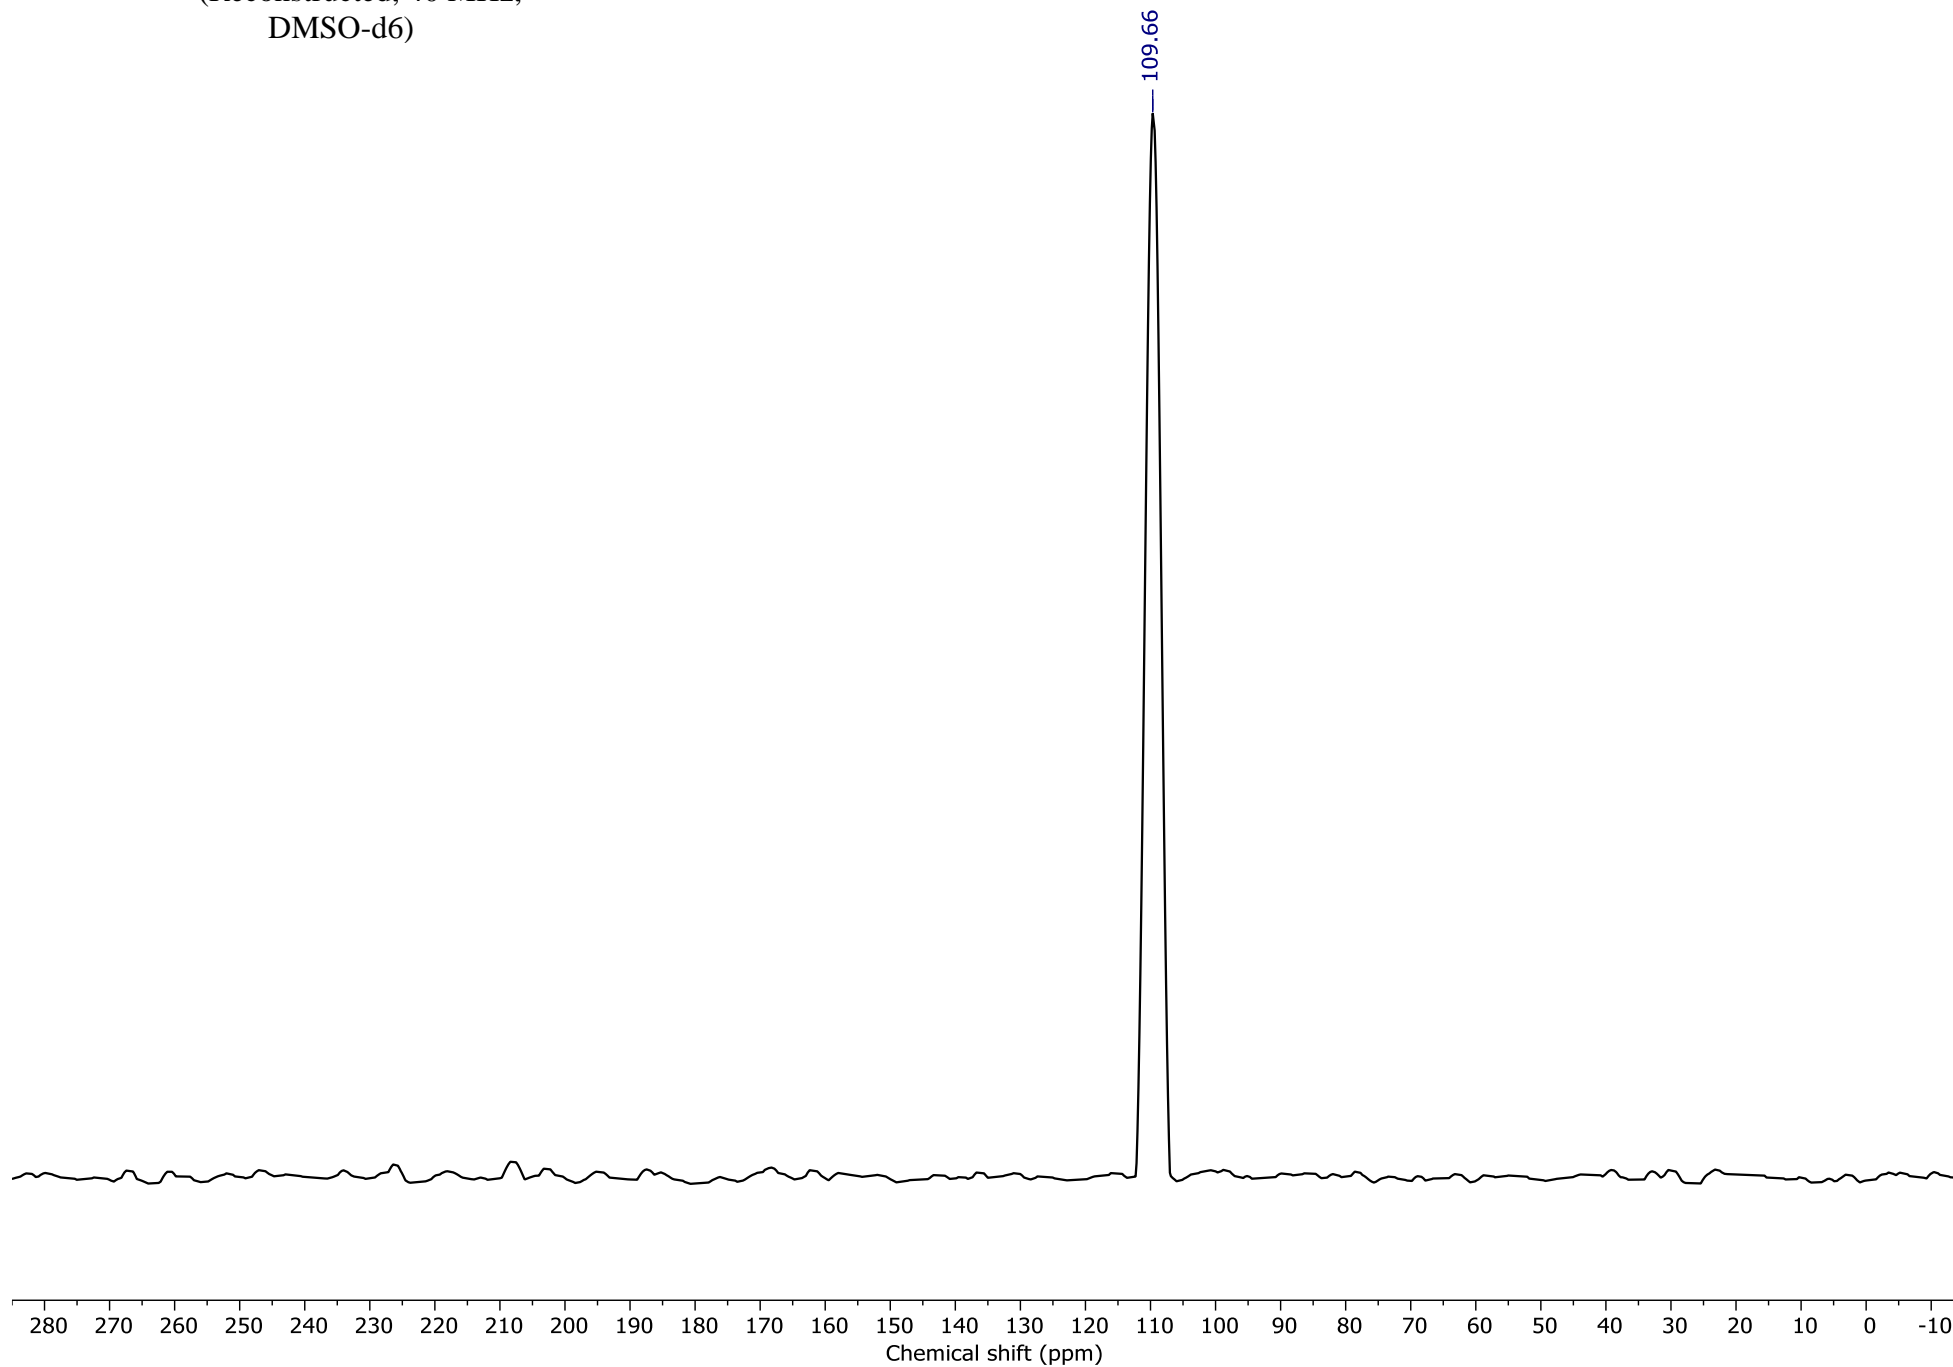



$^1\text{H} - ^{13}\text{C}$  HMBC  
(400 MHz, DMSO-d<sub>6</sub>)

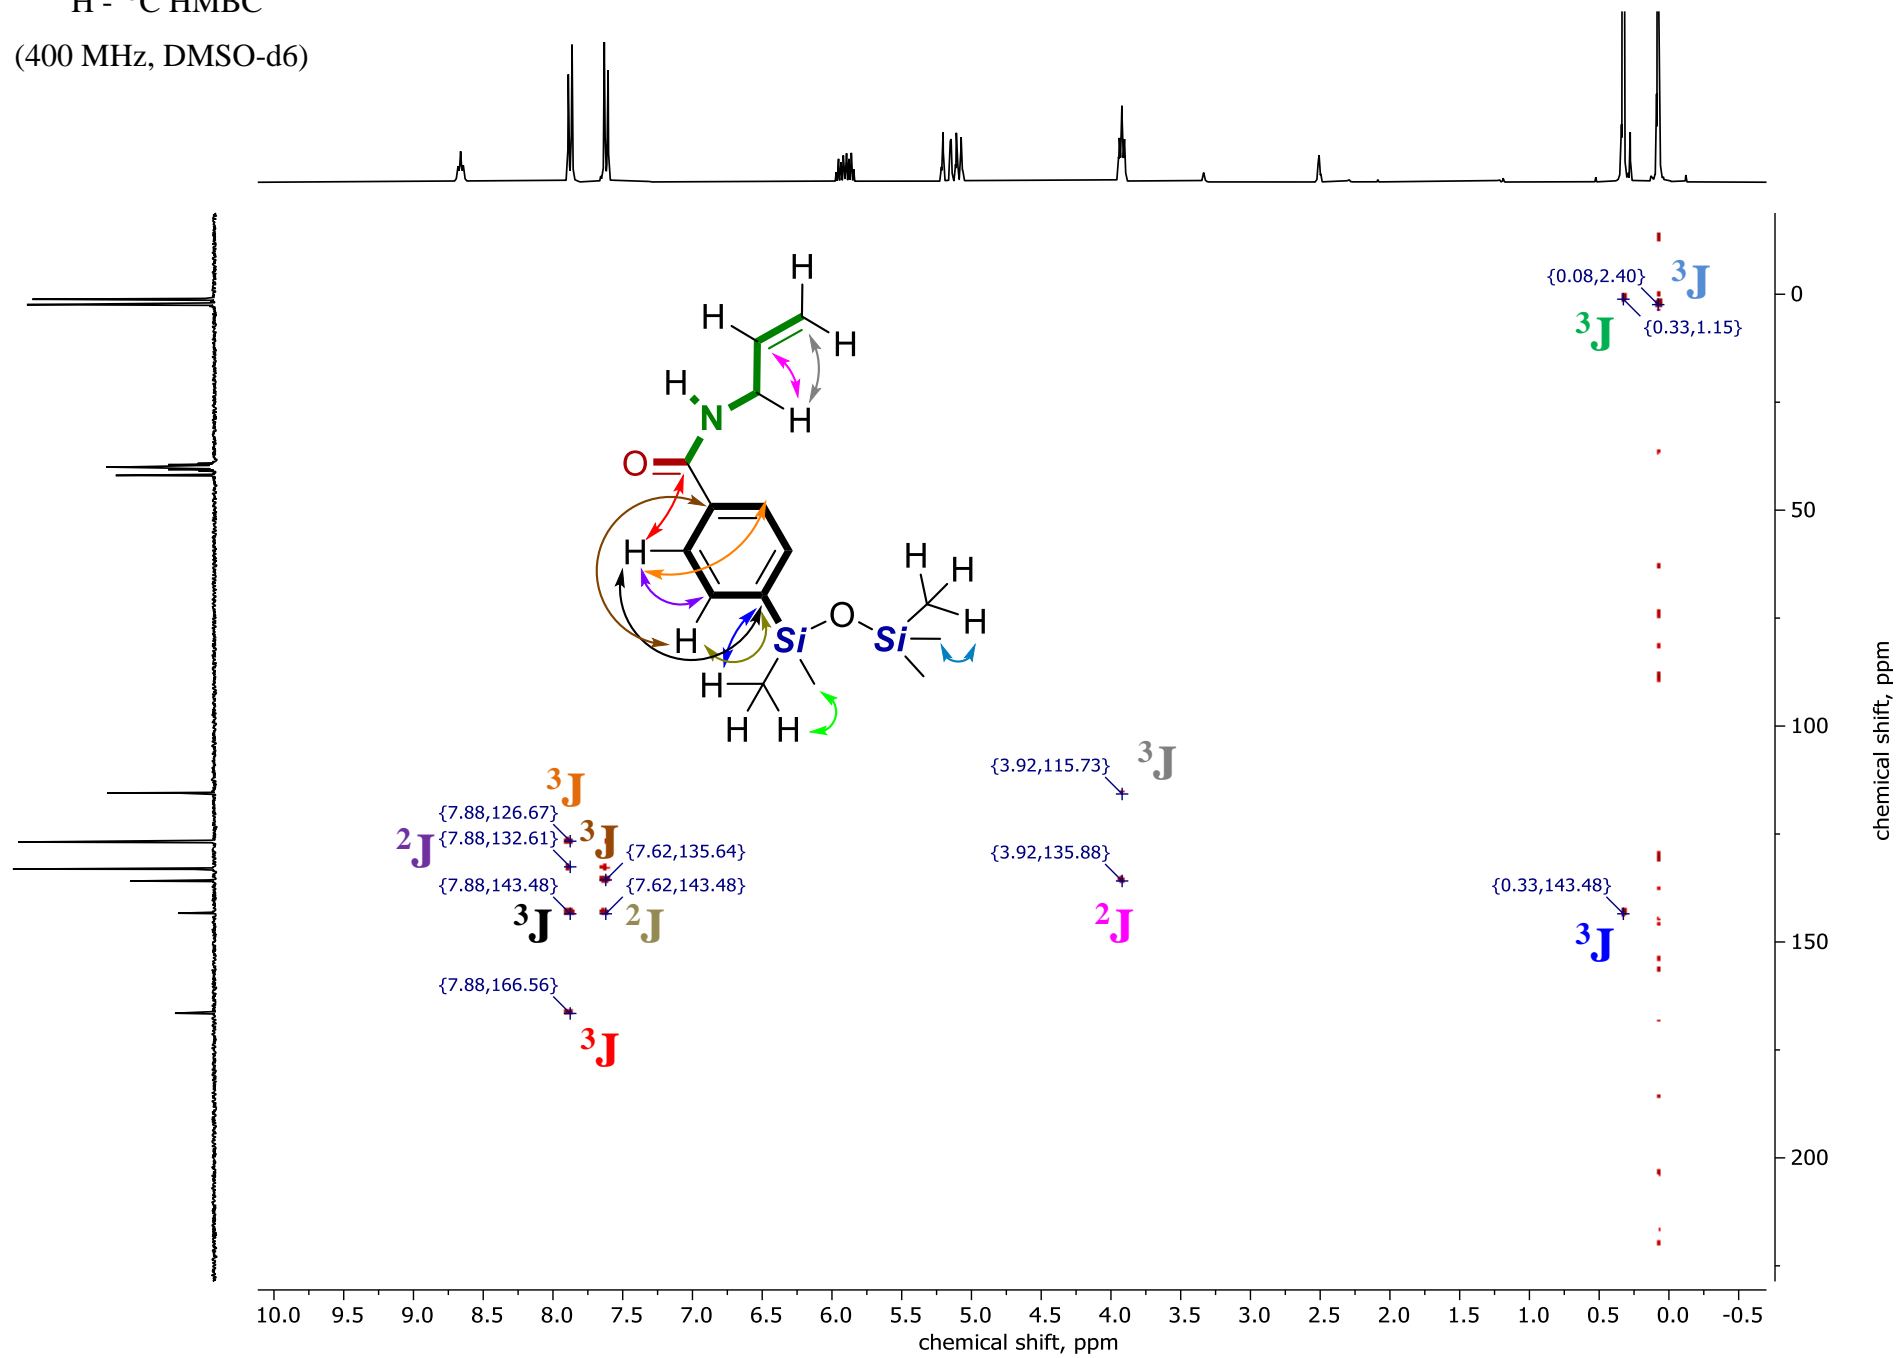

$^1\text{H} - ^{13}\text{C}$  HSQC  
(400 MHz, DMSO-d<sub>6</sub>)

S114

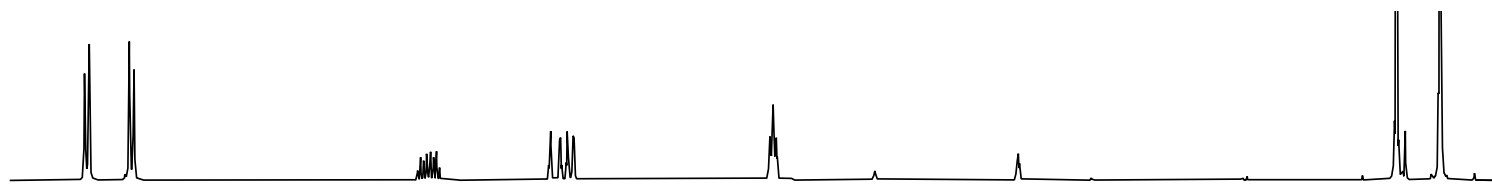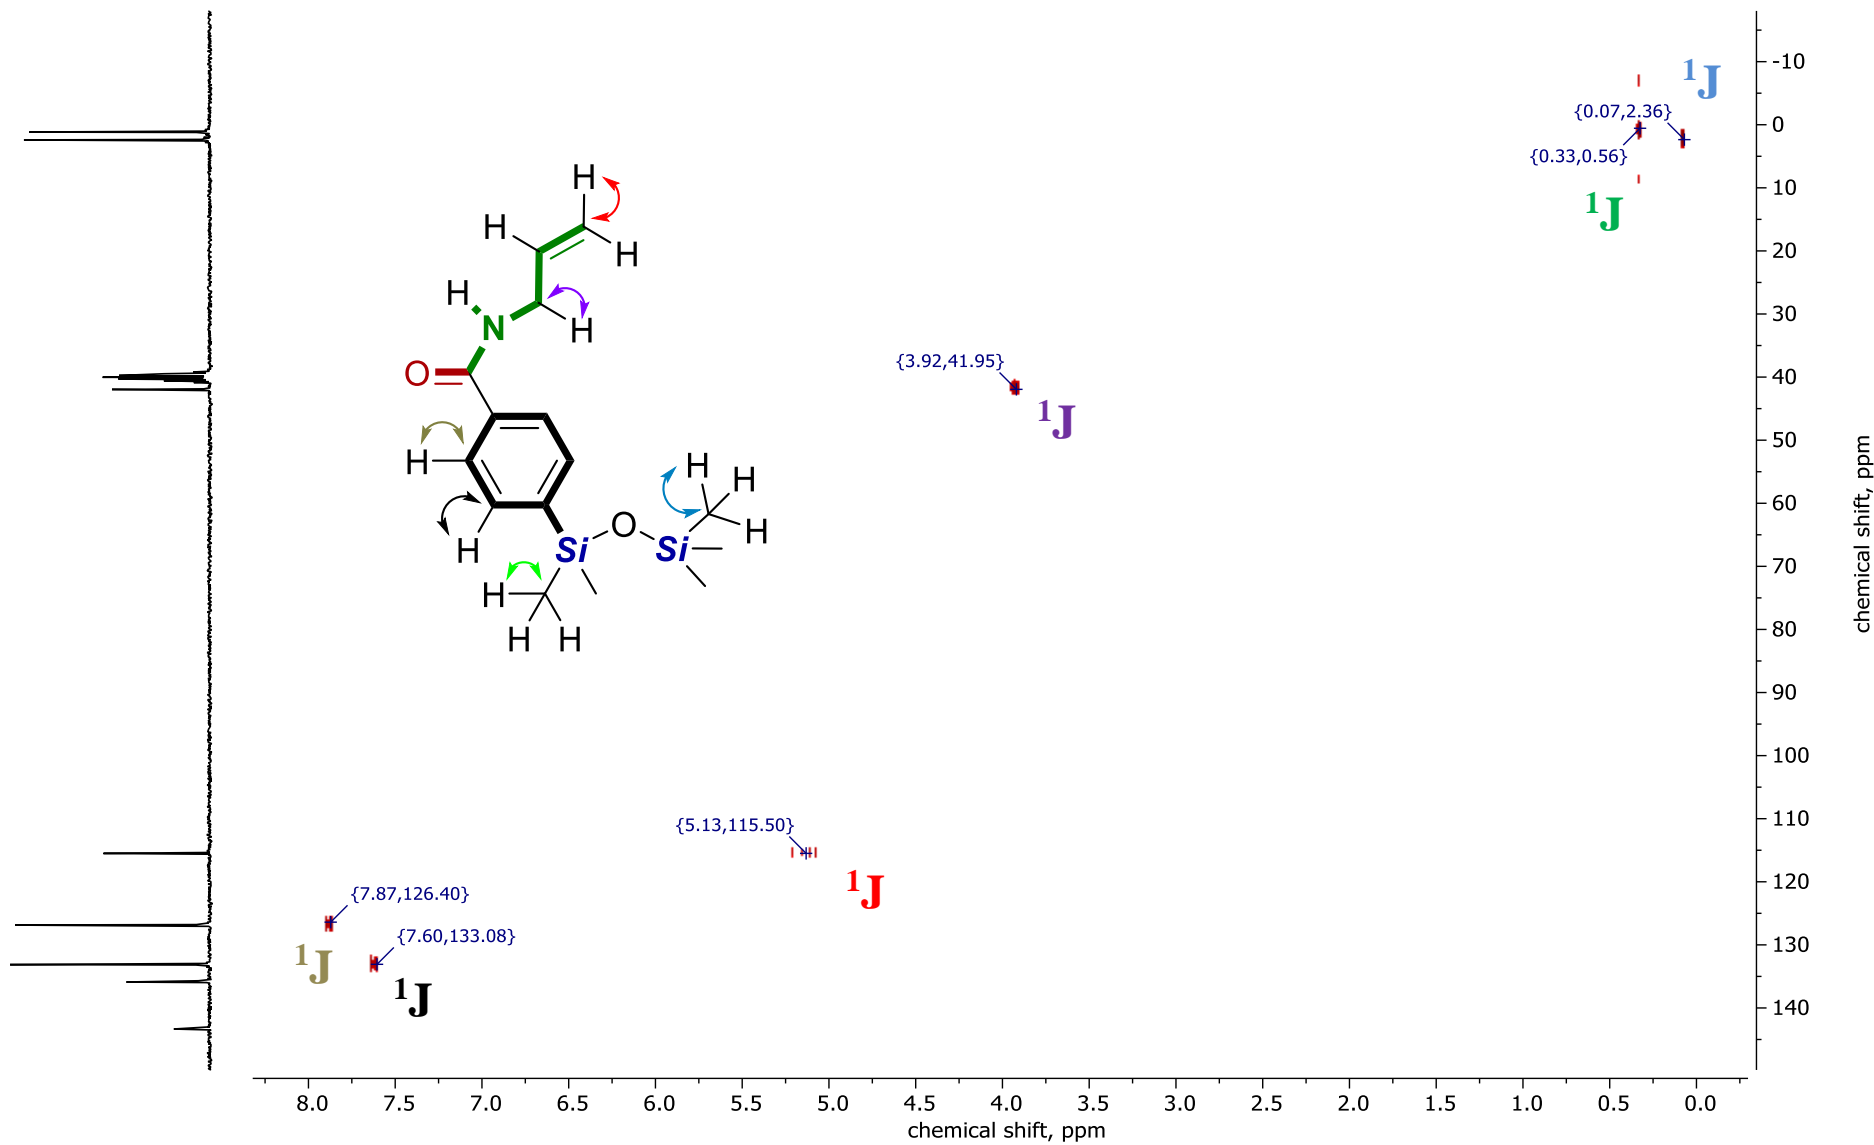

$^1\text{H} - ^{29}\text{Si}$  HMBC  
(400 MHz, DMSO-d<sub>6</sub>)

S115

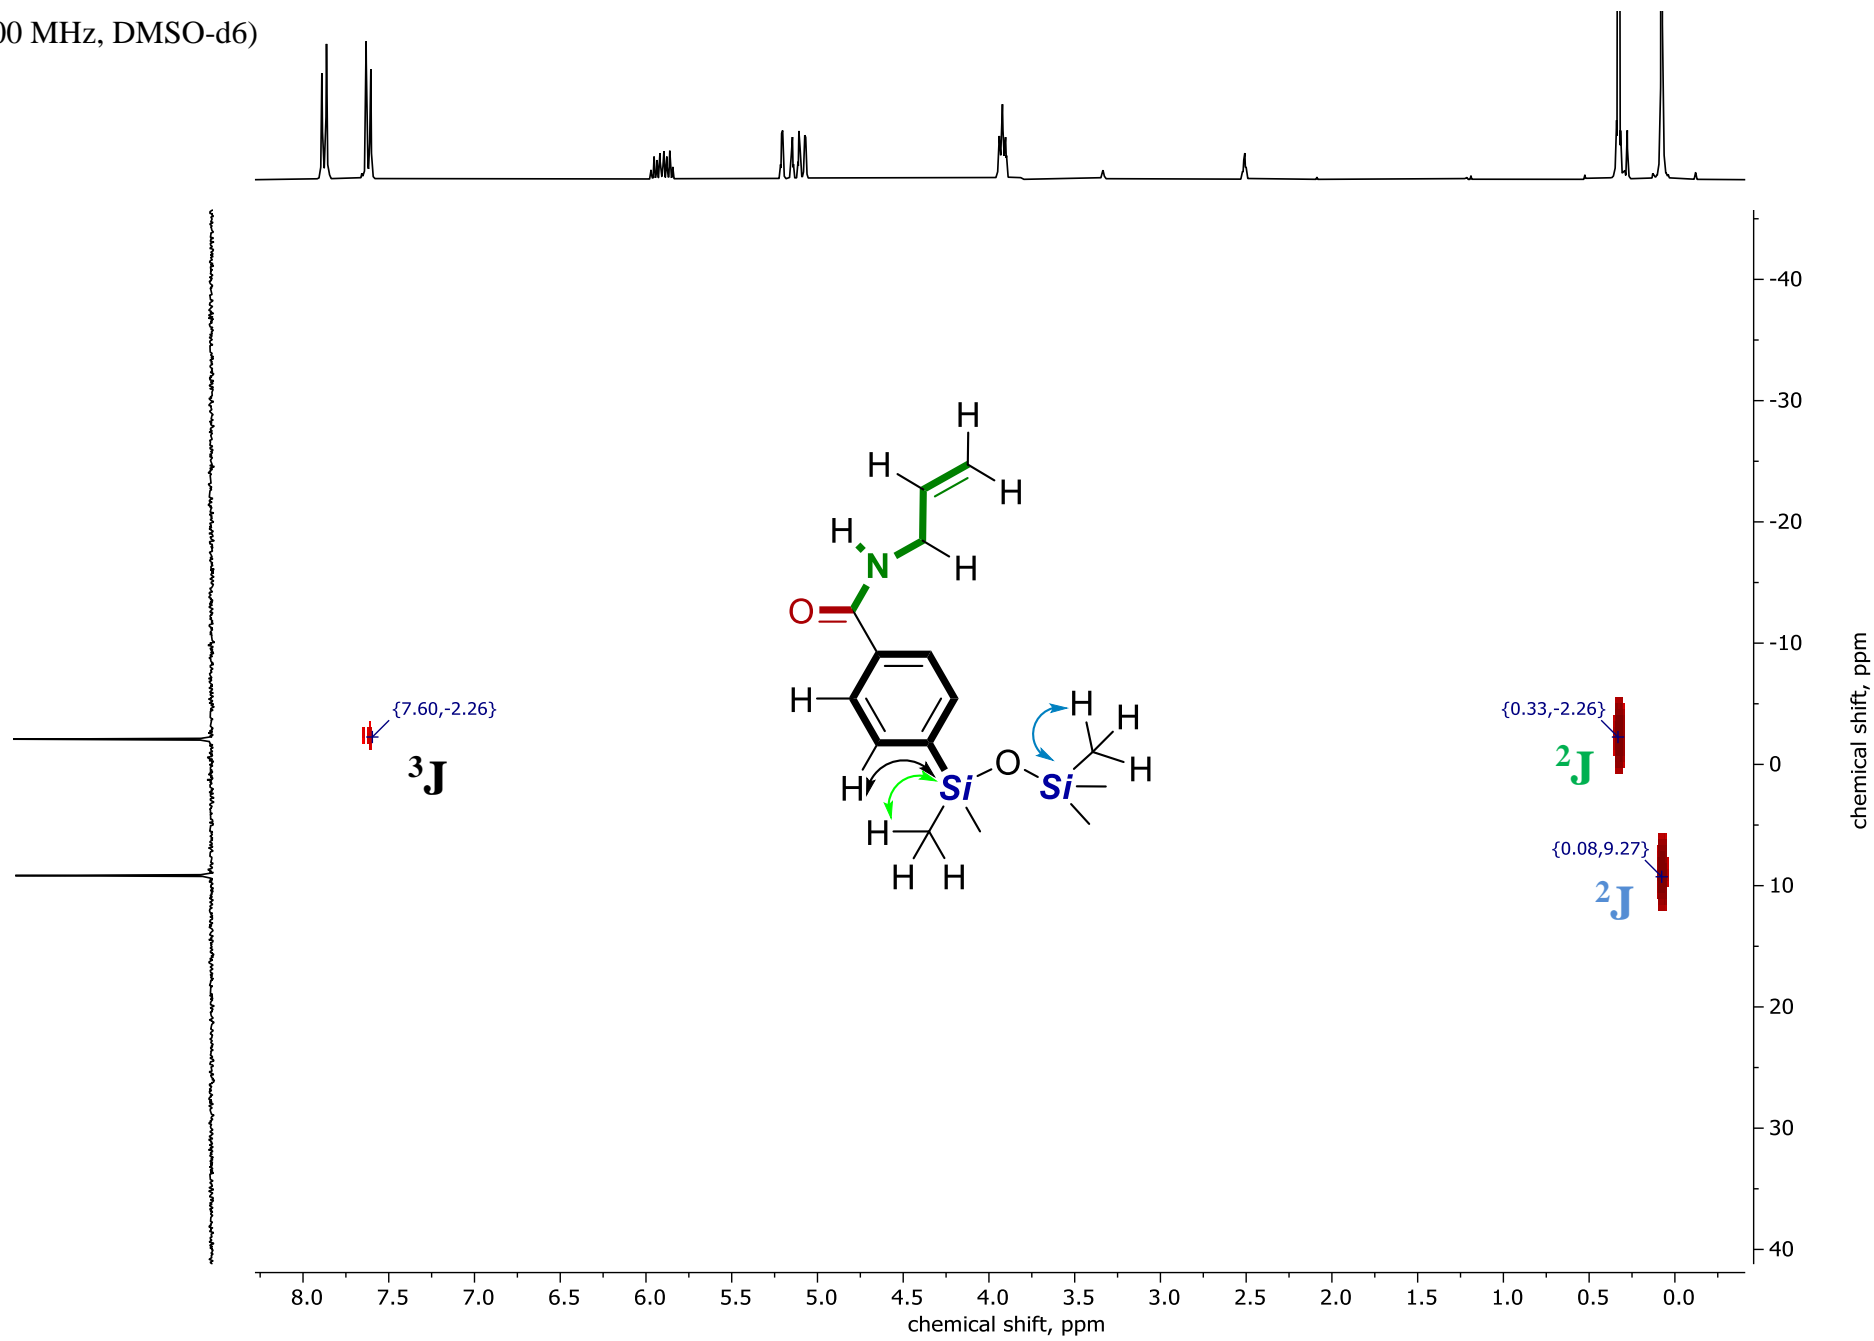

$^1\text{H} - ^{15}\text{N}$  HSQC  
(400 MHz, DMSO-d6)

S116

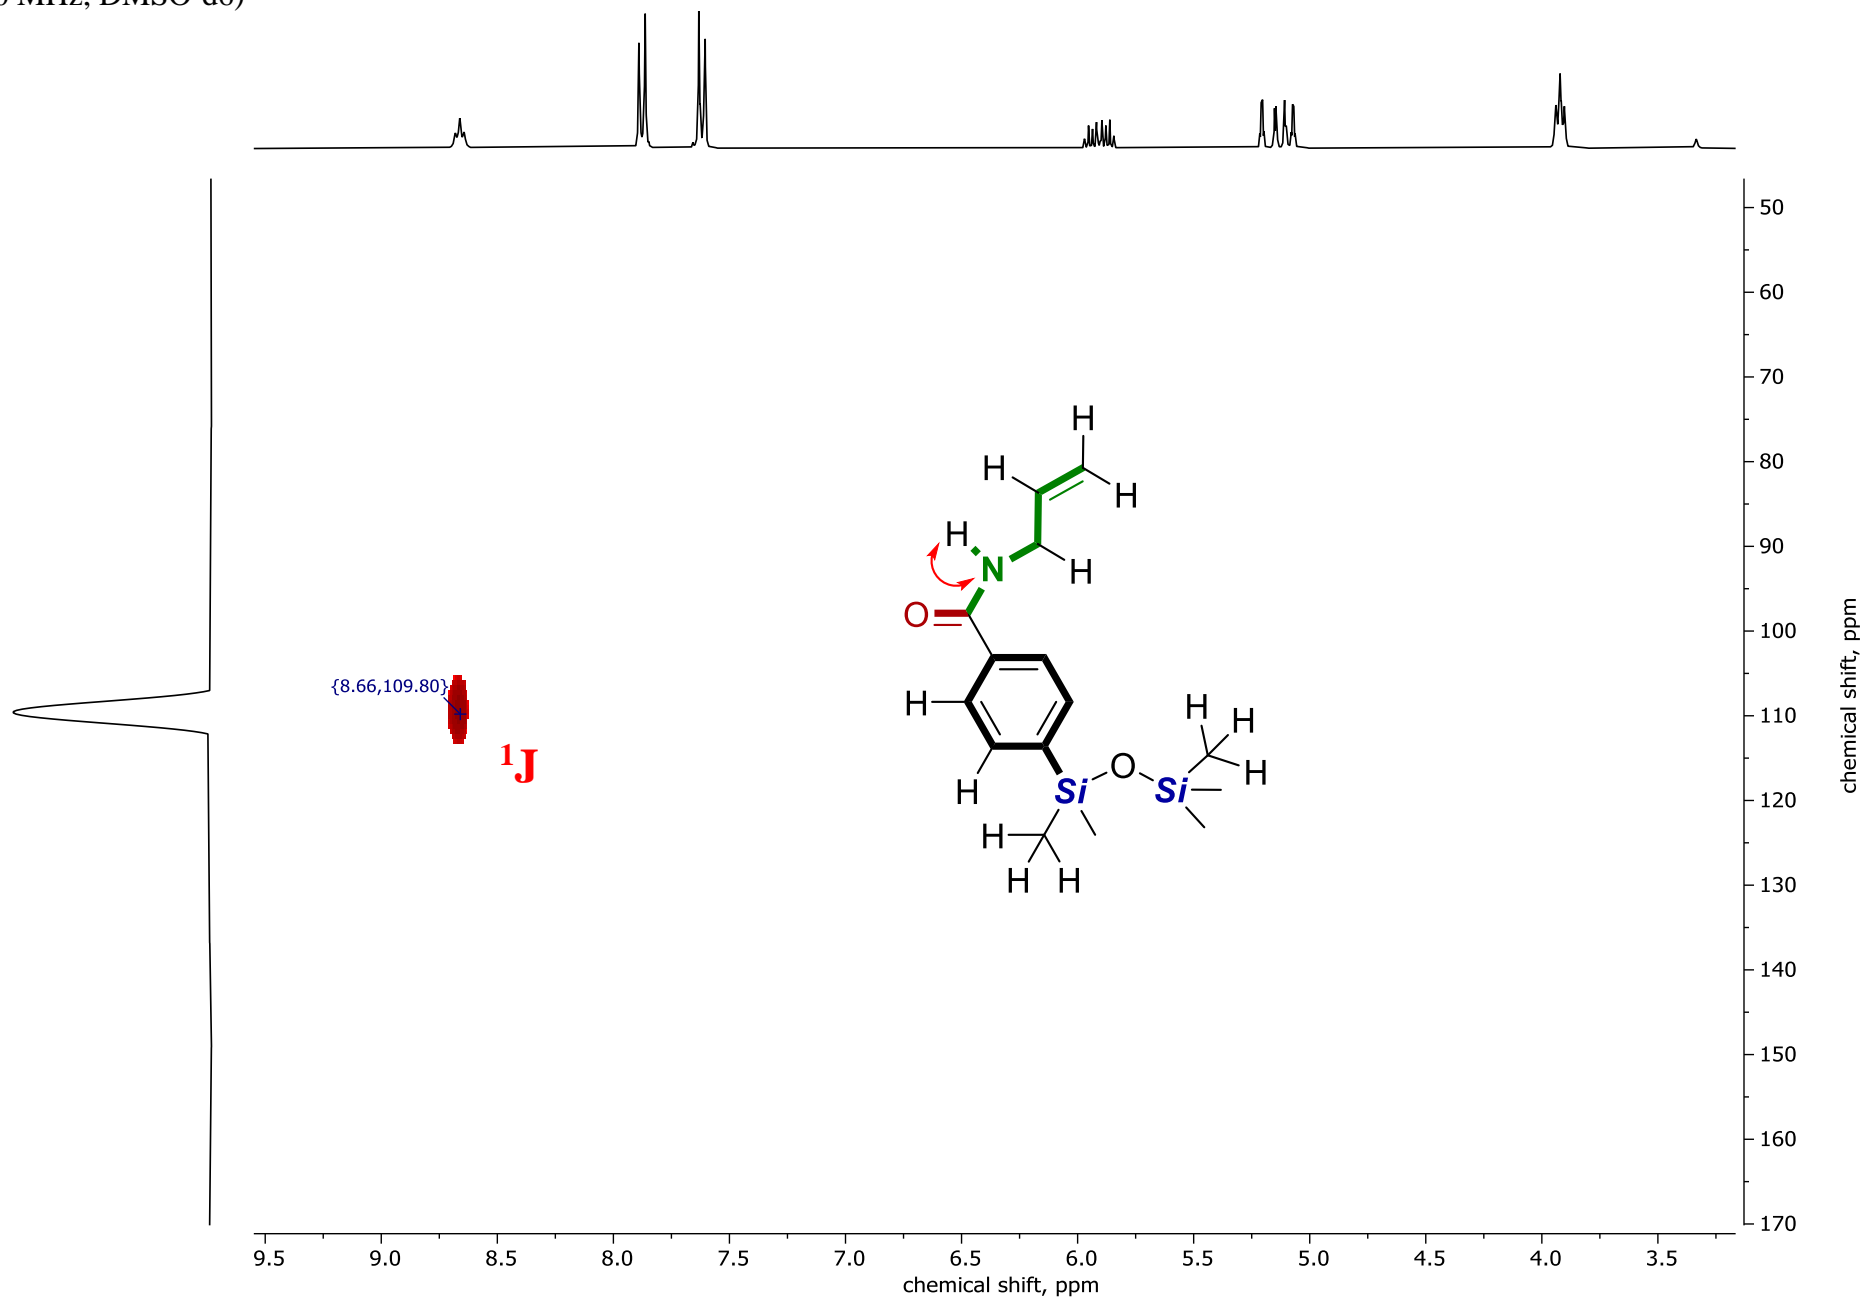

S117

IR spectrum

— 3138

— 2959

— 1934

— 1721

— 1642

— 1543

— 1429

— 1284

— 1057

— 920

— 816

— 638

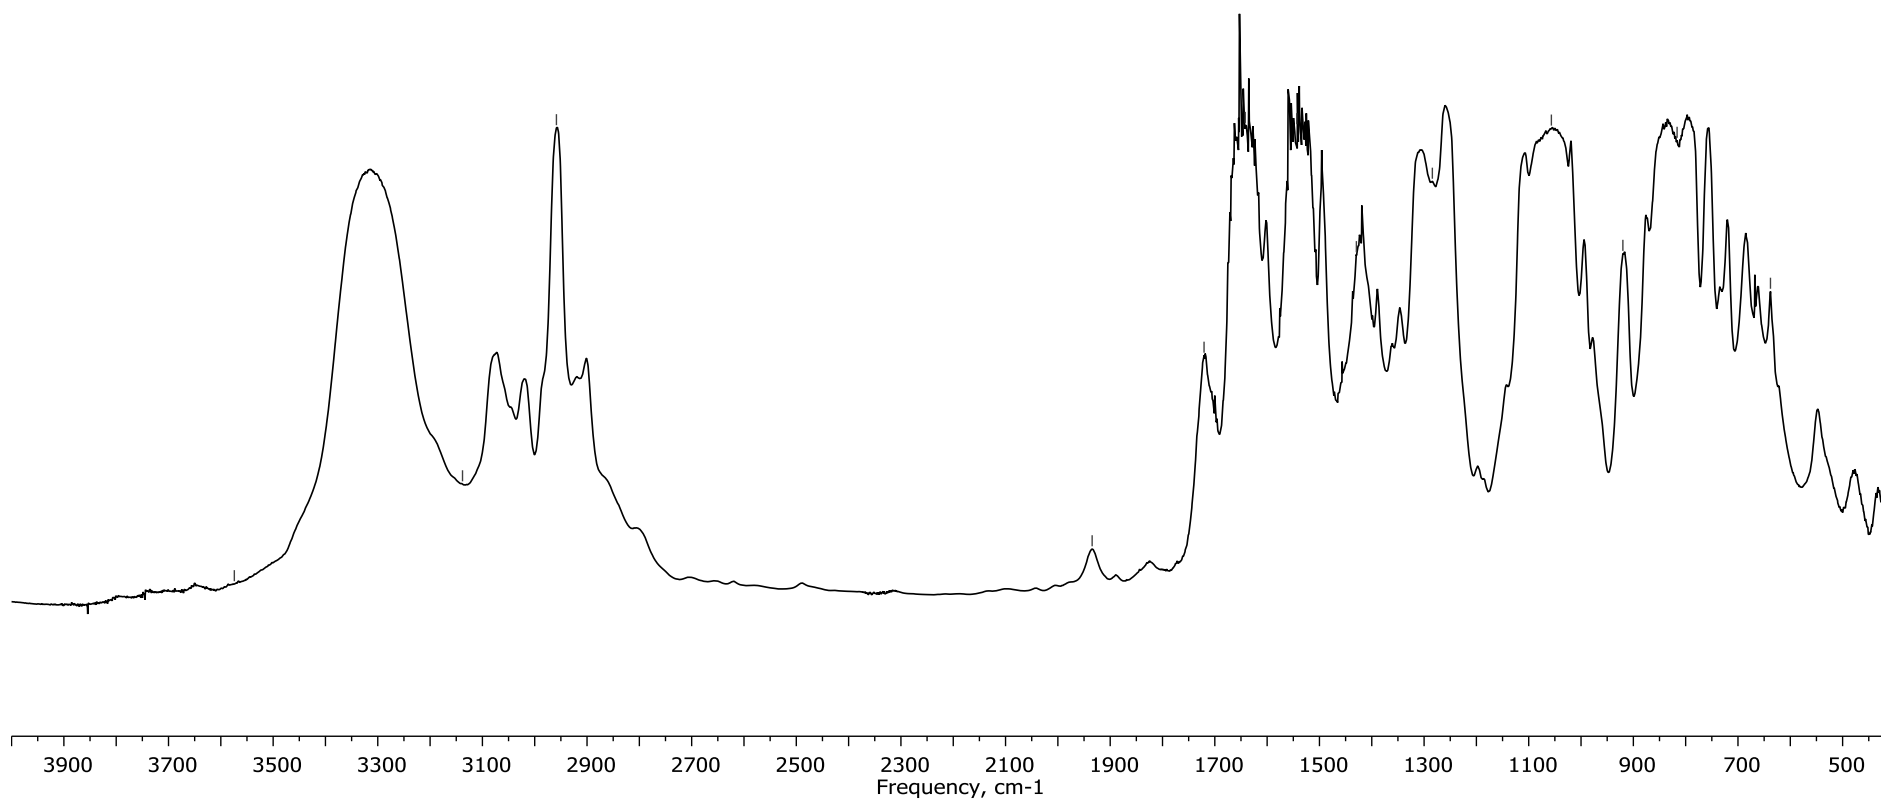

HRMS (ESI)

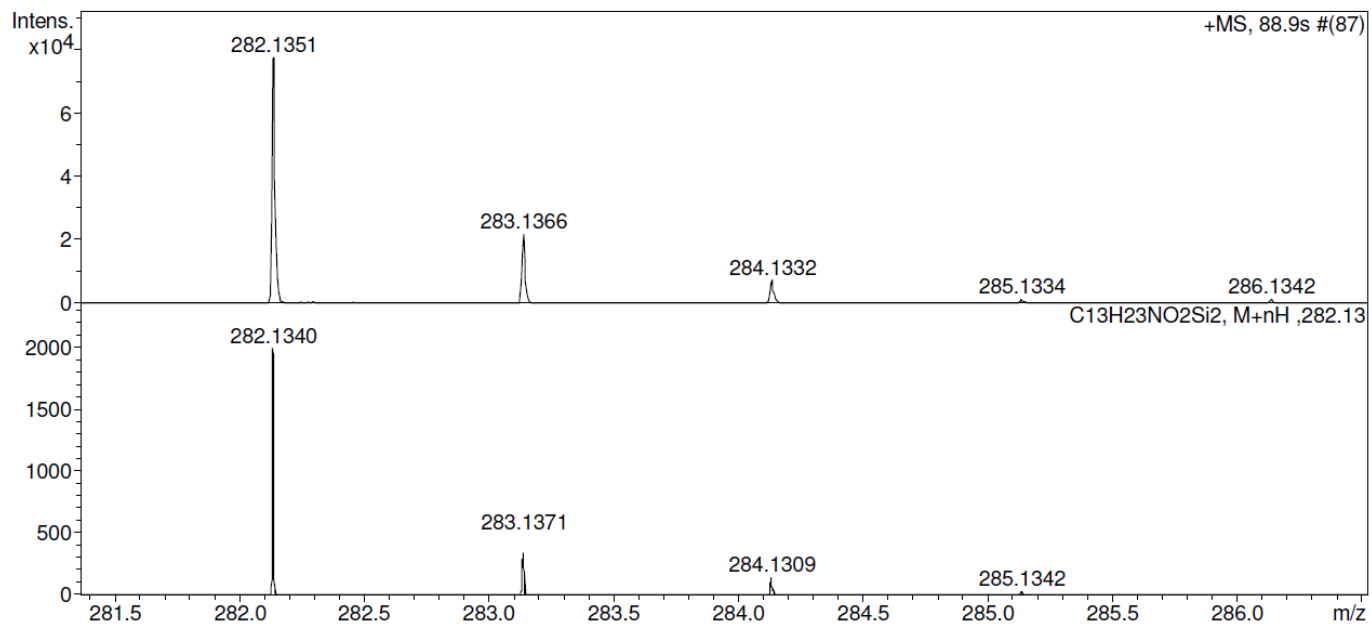

S119

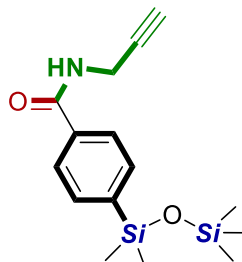

**Characterisation data for 4-(1,1,3,3,3-pentamethyldisiloxanyl)-N-(prop-2-yn-1-yl)benzamide:**

$^1\text{H}$  NMR (400 MHz, DMSO):  $\delta$  = 8.92 (t,  $^3\text{J}=7$ , 1H),  $\delta$  = 7.86 (d,  $^3\text{J}=11$ , 2H),  $\delta$  = 7.62 (d,  $^3\text{J}=11$ , 2H),  $\delta$  = 4.08-4.06 (m, 2H),  $\delta$  = 3.09 (t,  $^4\text{J}=3$ , 1H),  $\delta$  = 0.32 (s, 6H),  $\delta$  = 0.07 (s, 9H).  $^{13}\text{C}$  NMR (100 MHz, DMSO):  $\delta$  = 165.90, 143.22, 134.59, 132.69, 126.40, 81.23, 72.72, 28.45, 1.90, 0.64.  $^{29}\text{Si}$  NMR (80 MHz, DMSO):  $\delta$  = 9.23, -2.06.  $^{15}\text{N}$  NMR (40 MHz, DMSO):  $\delta$  = 107.75. HRMS (ESI)  $m/z$   $[\text{M} + \text{H}]^+$  : calcd for  $[\text{C}_{15}\text{H}_{23}\text{NO}_2\text{Si}_2 + \text{H}]^+$ , 306.1340; found, 306.1340. IR ( $\text{cm}^{-1}$ ): 3327, 3236, 2959, 2120, 1638, 1542, 1423, 1313, 1250, 1112, 1063, 843-639.

<sup>1</sup>H NMR

(400 MHz, DMSO-d6)

S120

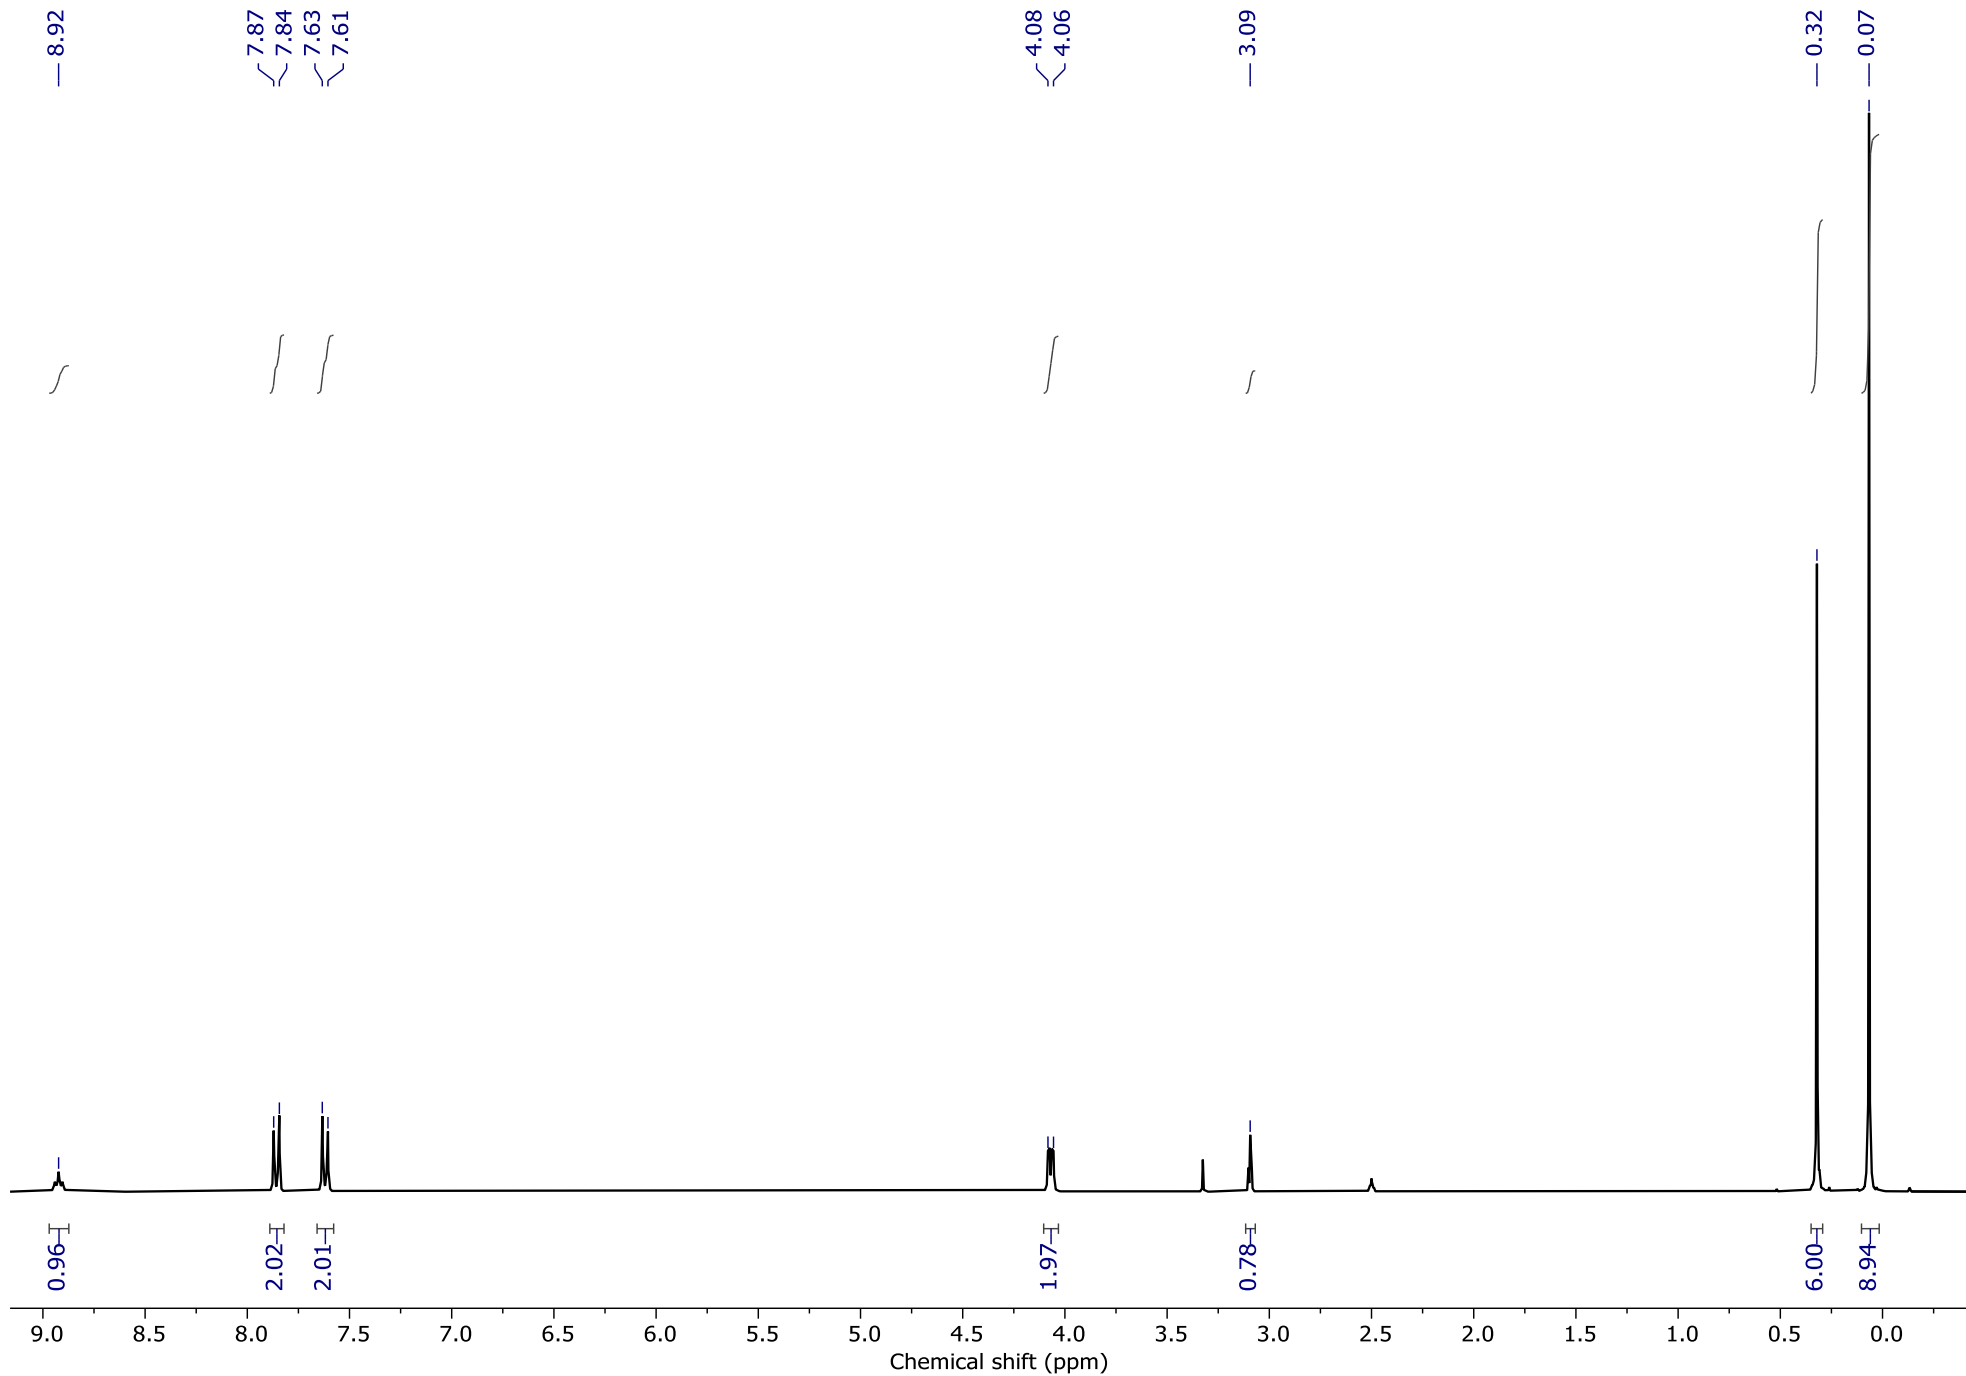



$^{13}\text{C}$  NMR

(100 MHz, DMSO-d6)

S121

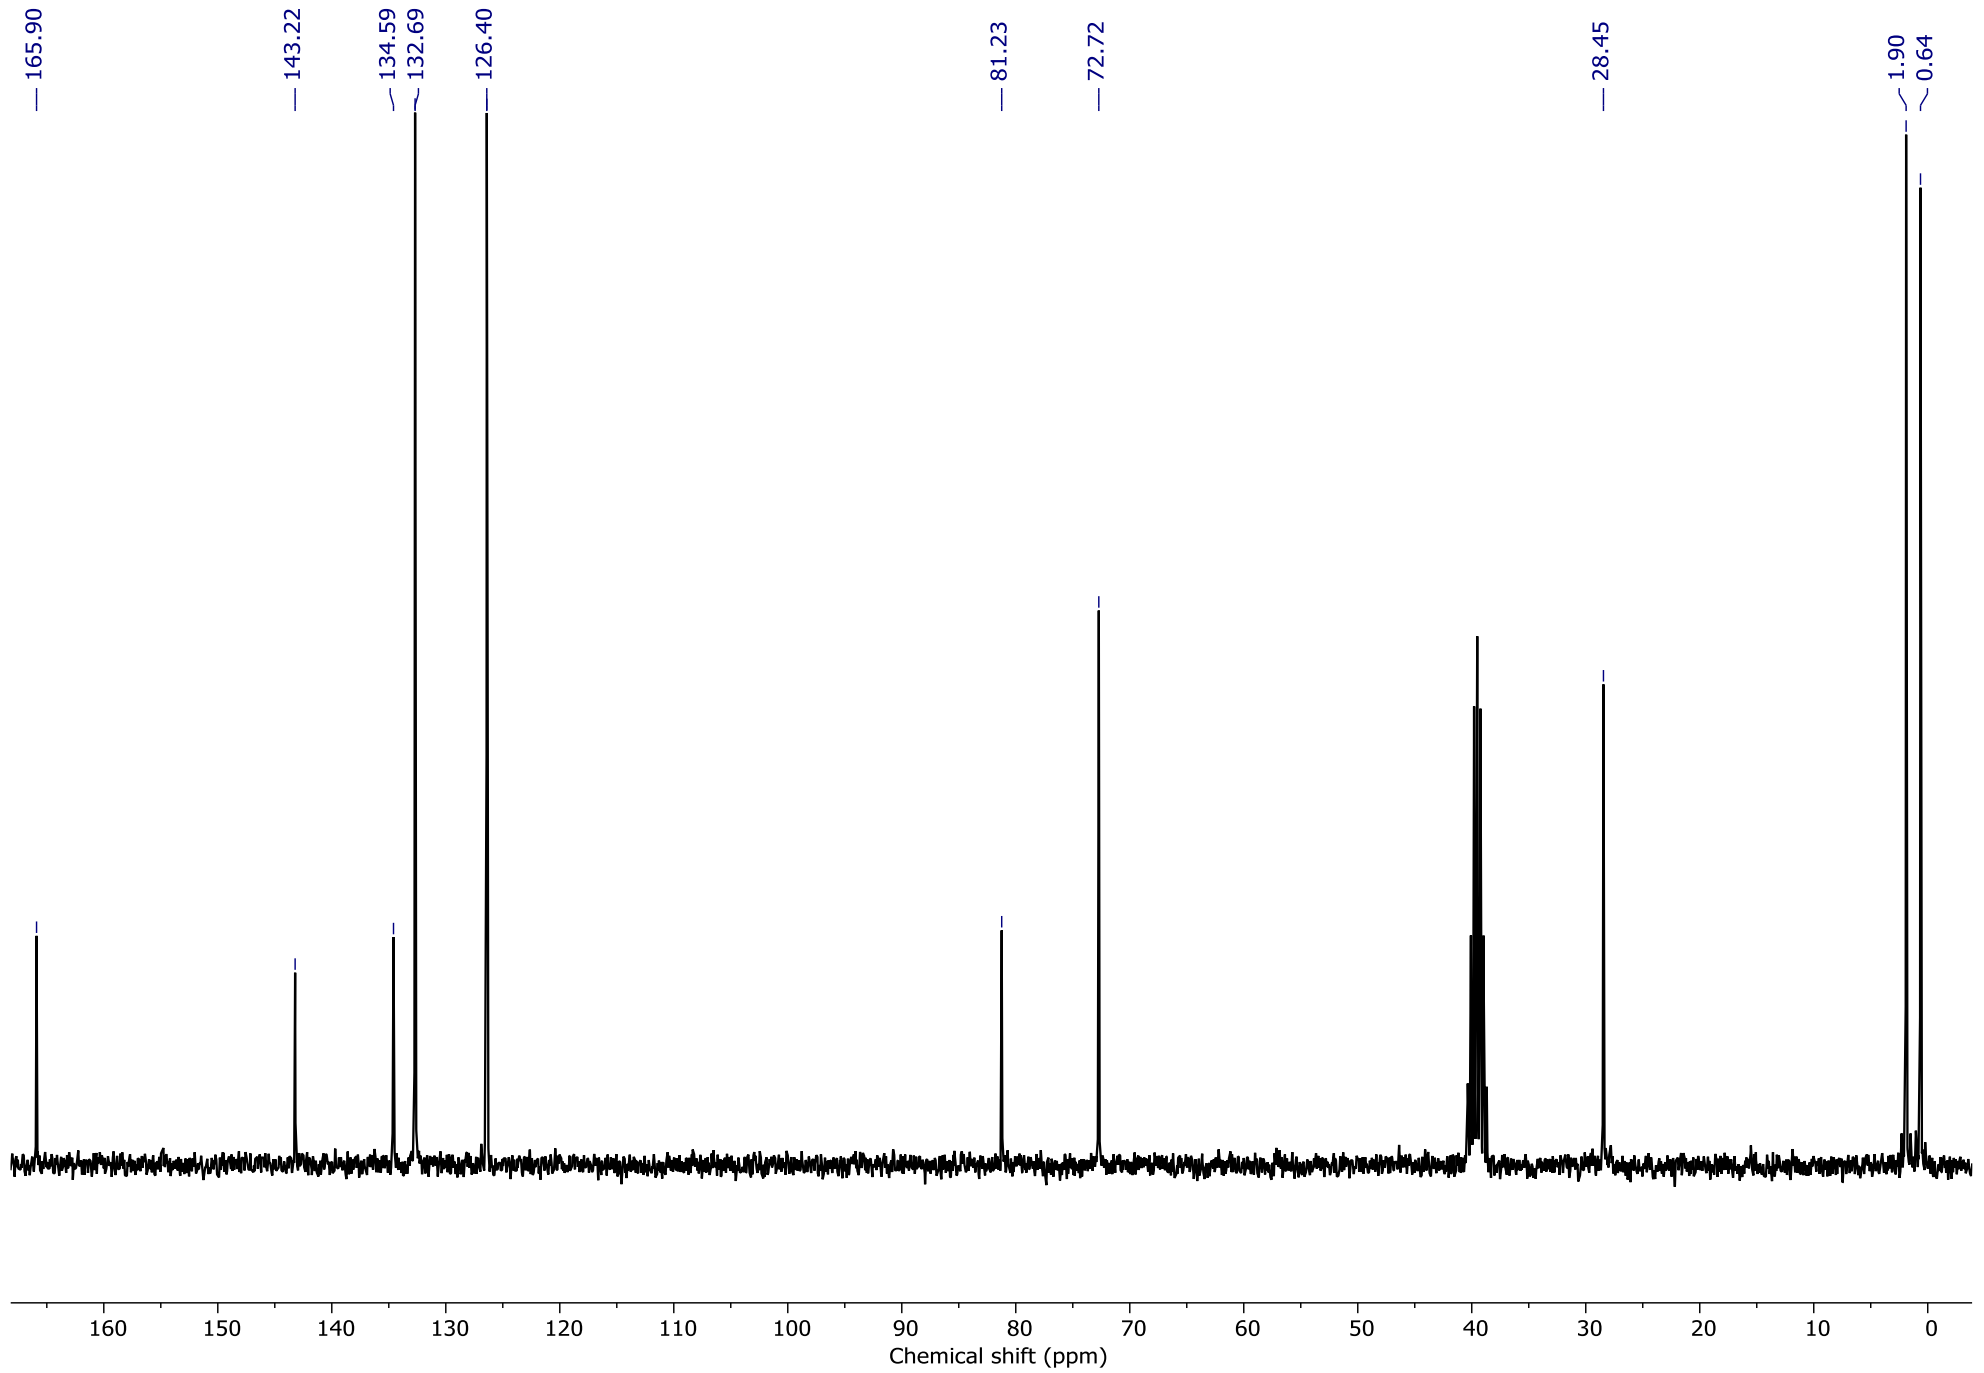

$^{29}\text{Si}$  NMR  
(80 MHz, DMSO-d6)

S122

9.23  
-2.06

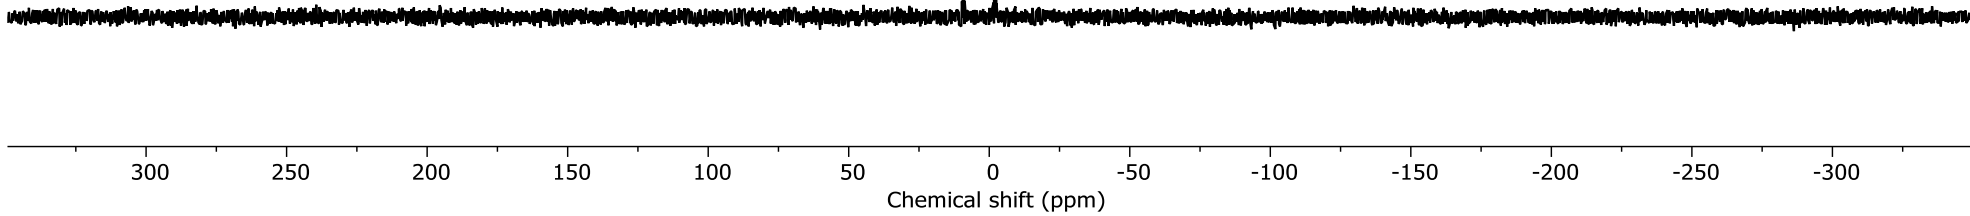

$^{15}\text{N}$  NMR  
(reconstructed, 40 MHz,  
DMSO-d<sub>6</sub>)

S123

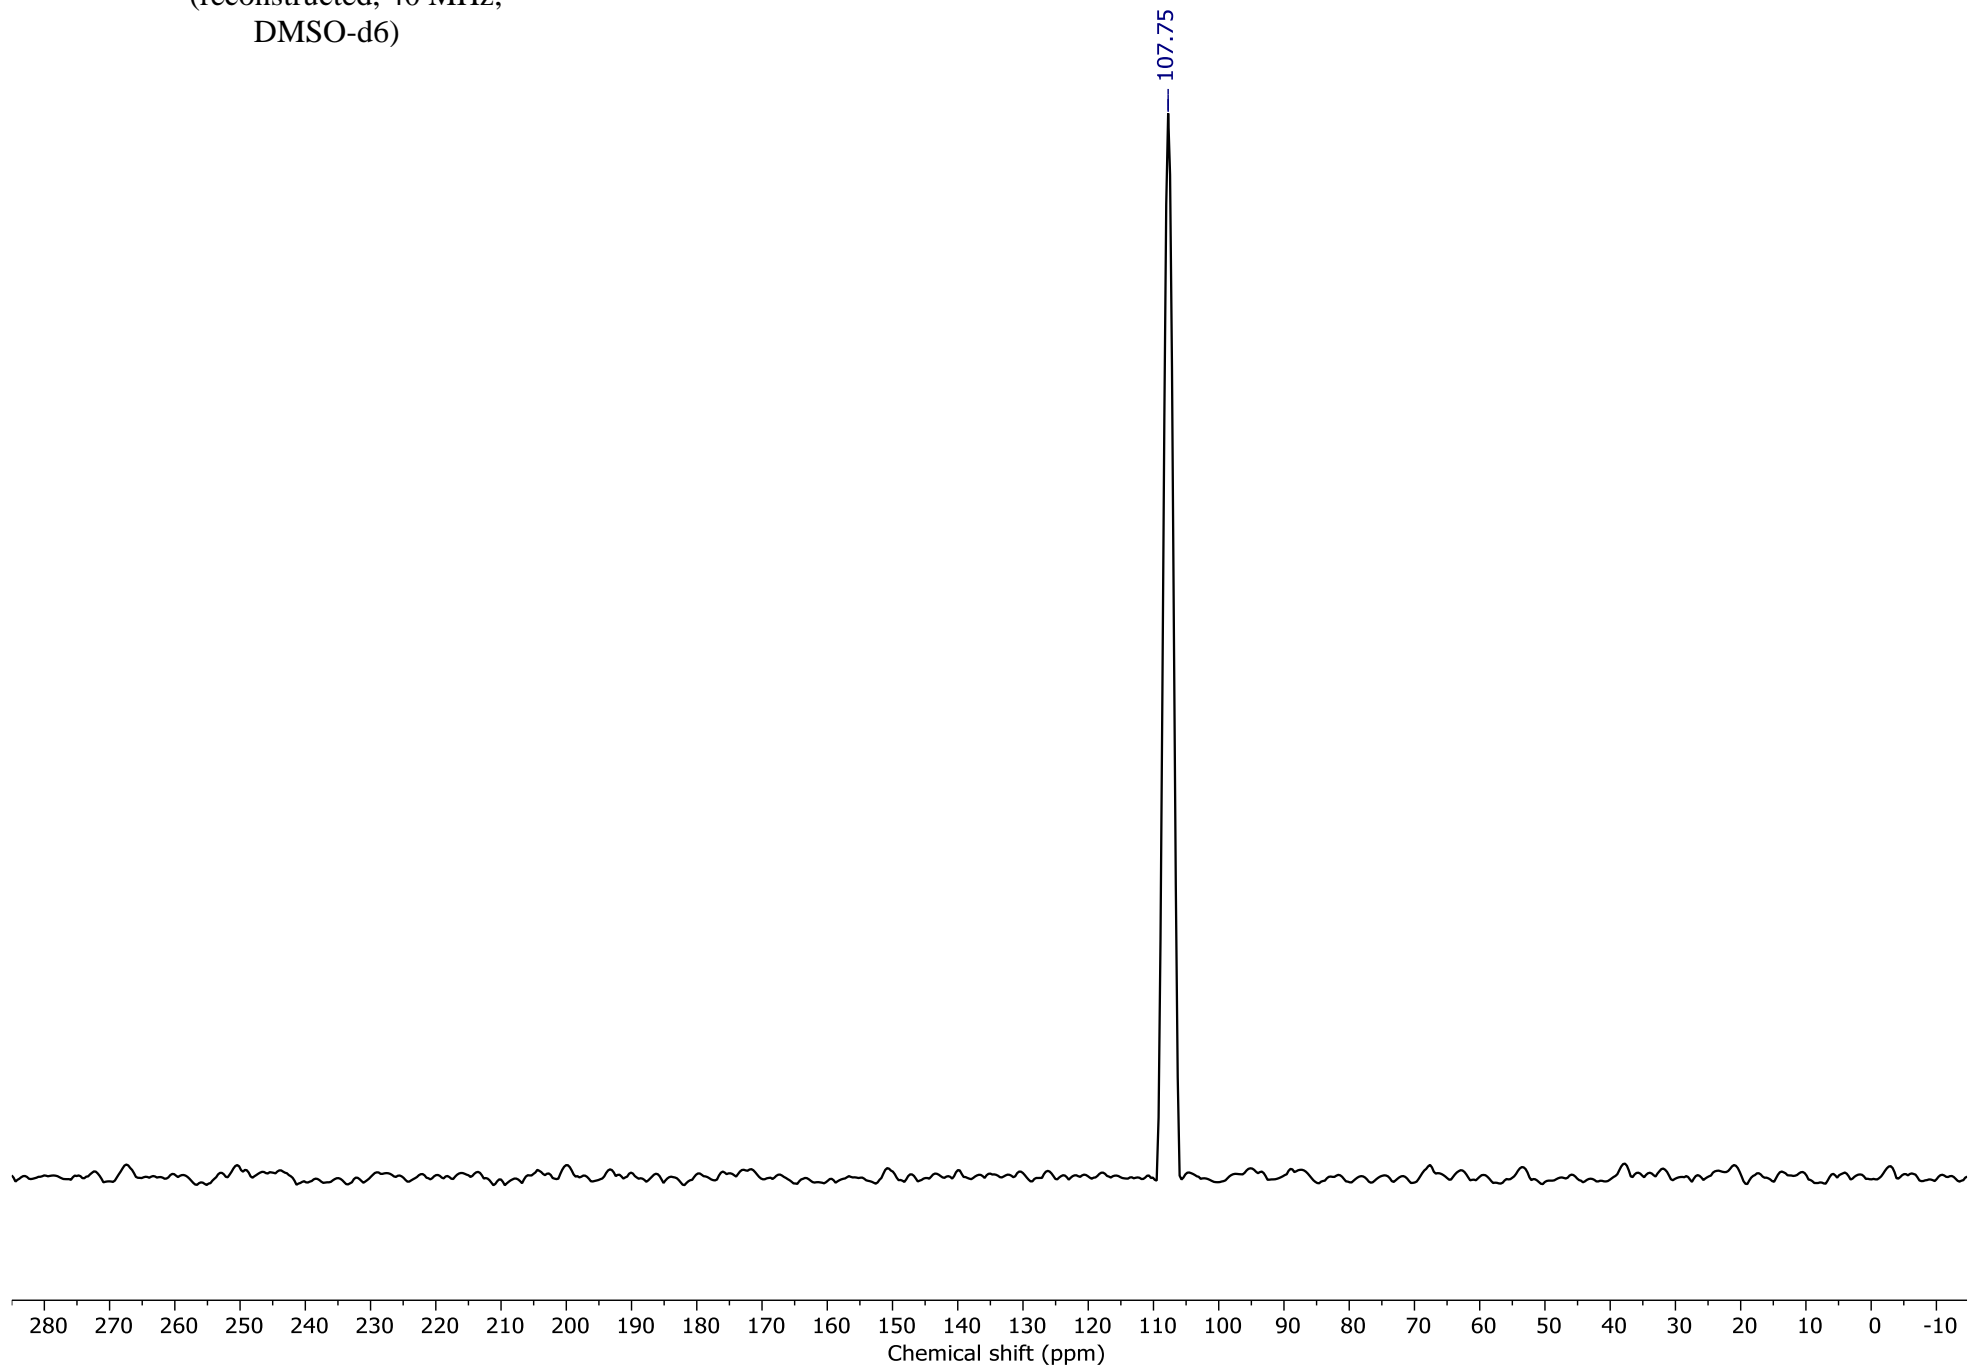

$^1\text{H} - ^{13}\text{C}$  HMBC  
(400 MHz, DMSO- $d_6$ )

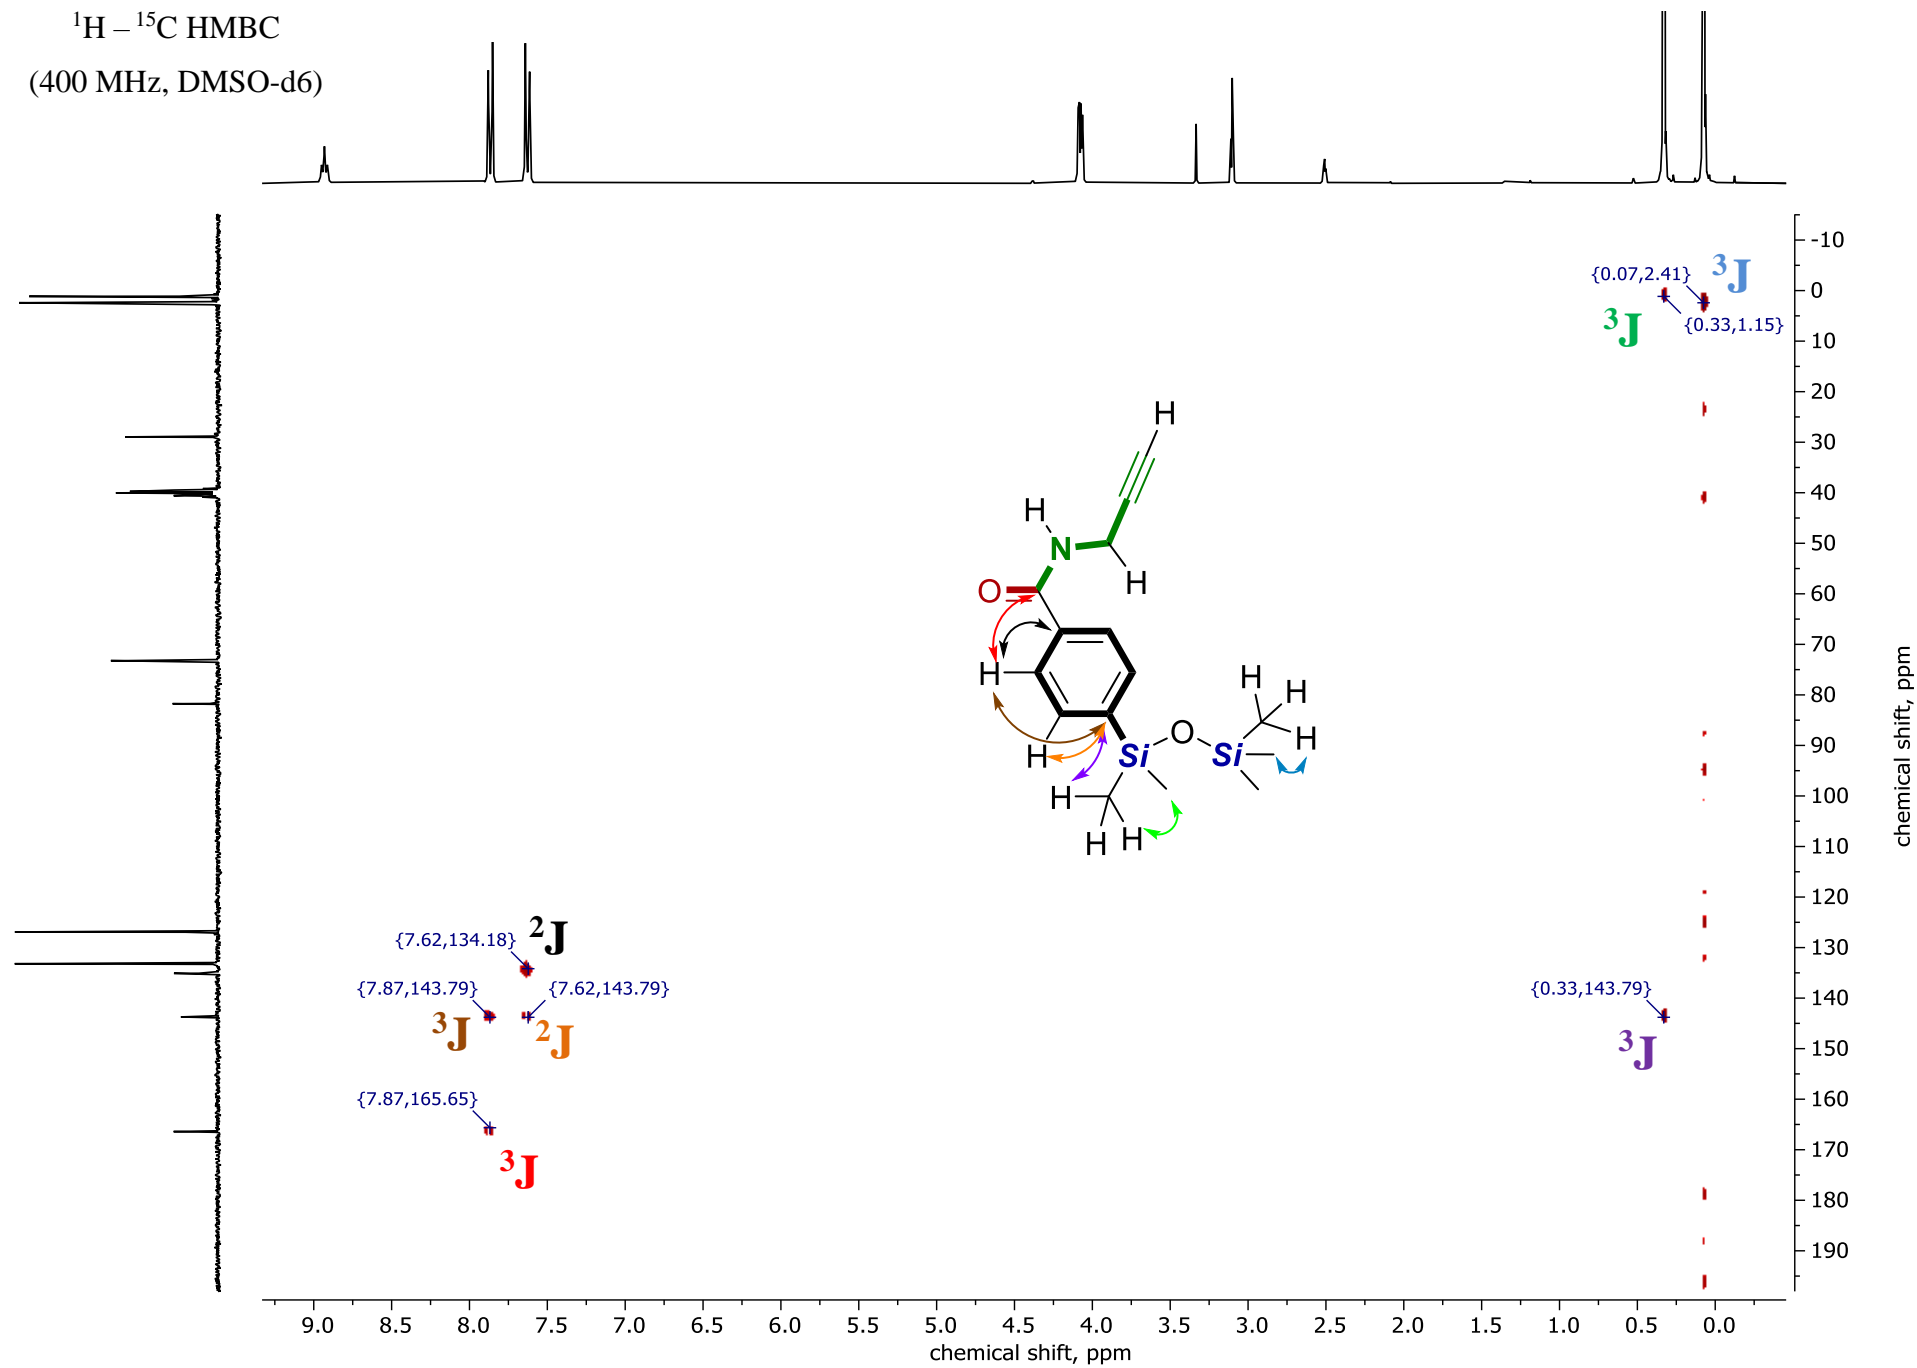

$^1\text{H} - ^{13}\text{C}$  HSQC  
(400 MHz, DMSO-d<sub>6</sub>)

S125

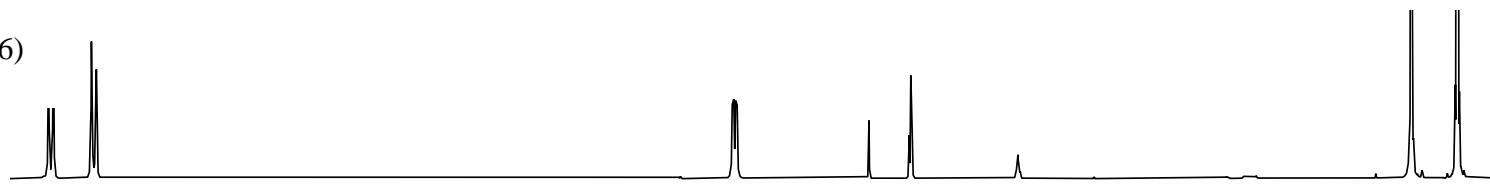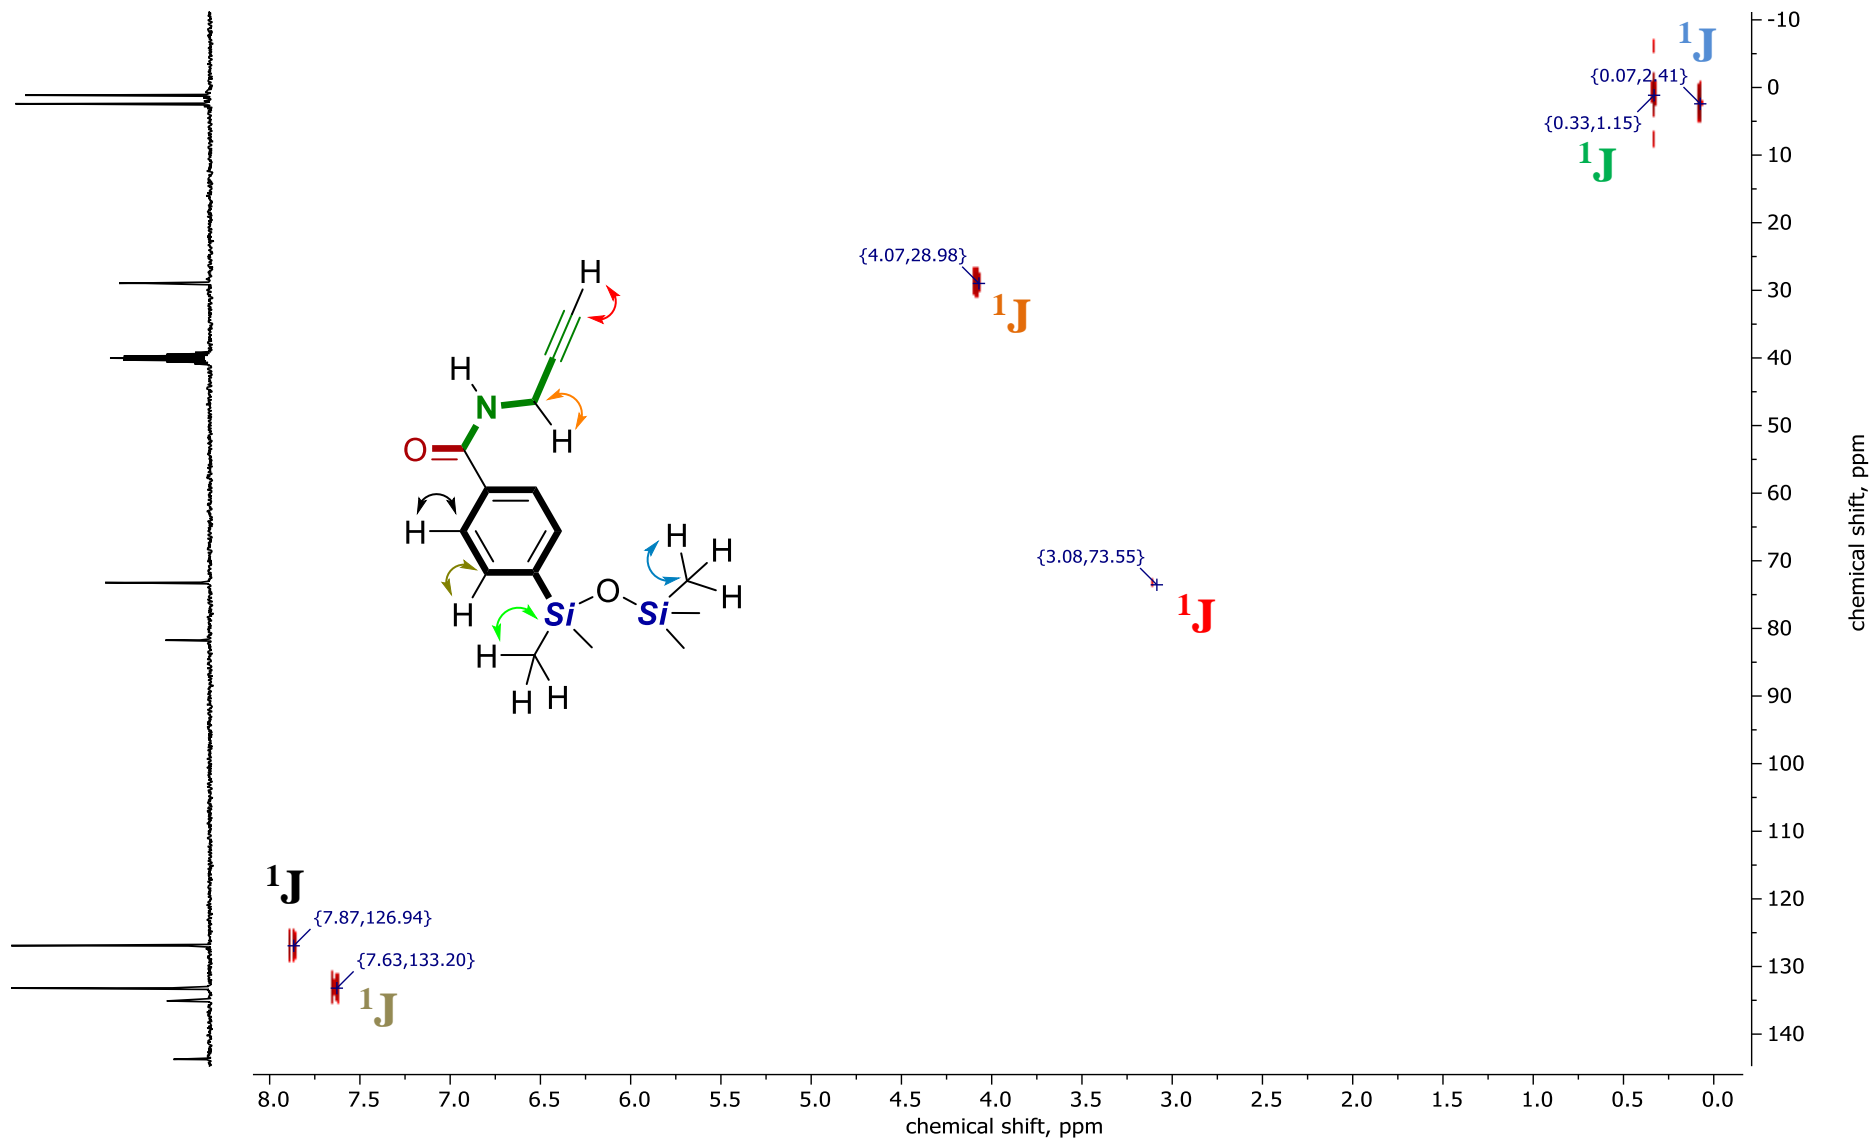

$^1\text{H} - ^{29}\text{Si}$  HMBC

S126

(400 MHz, DMSO-d<sub>6</sub>)

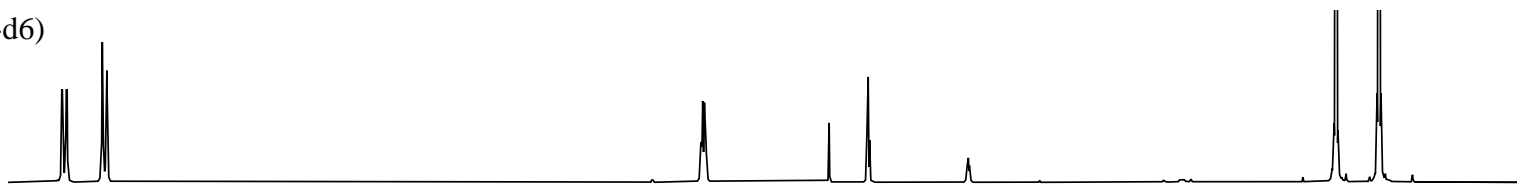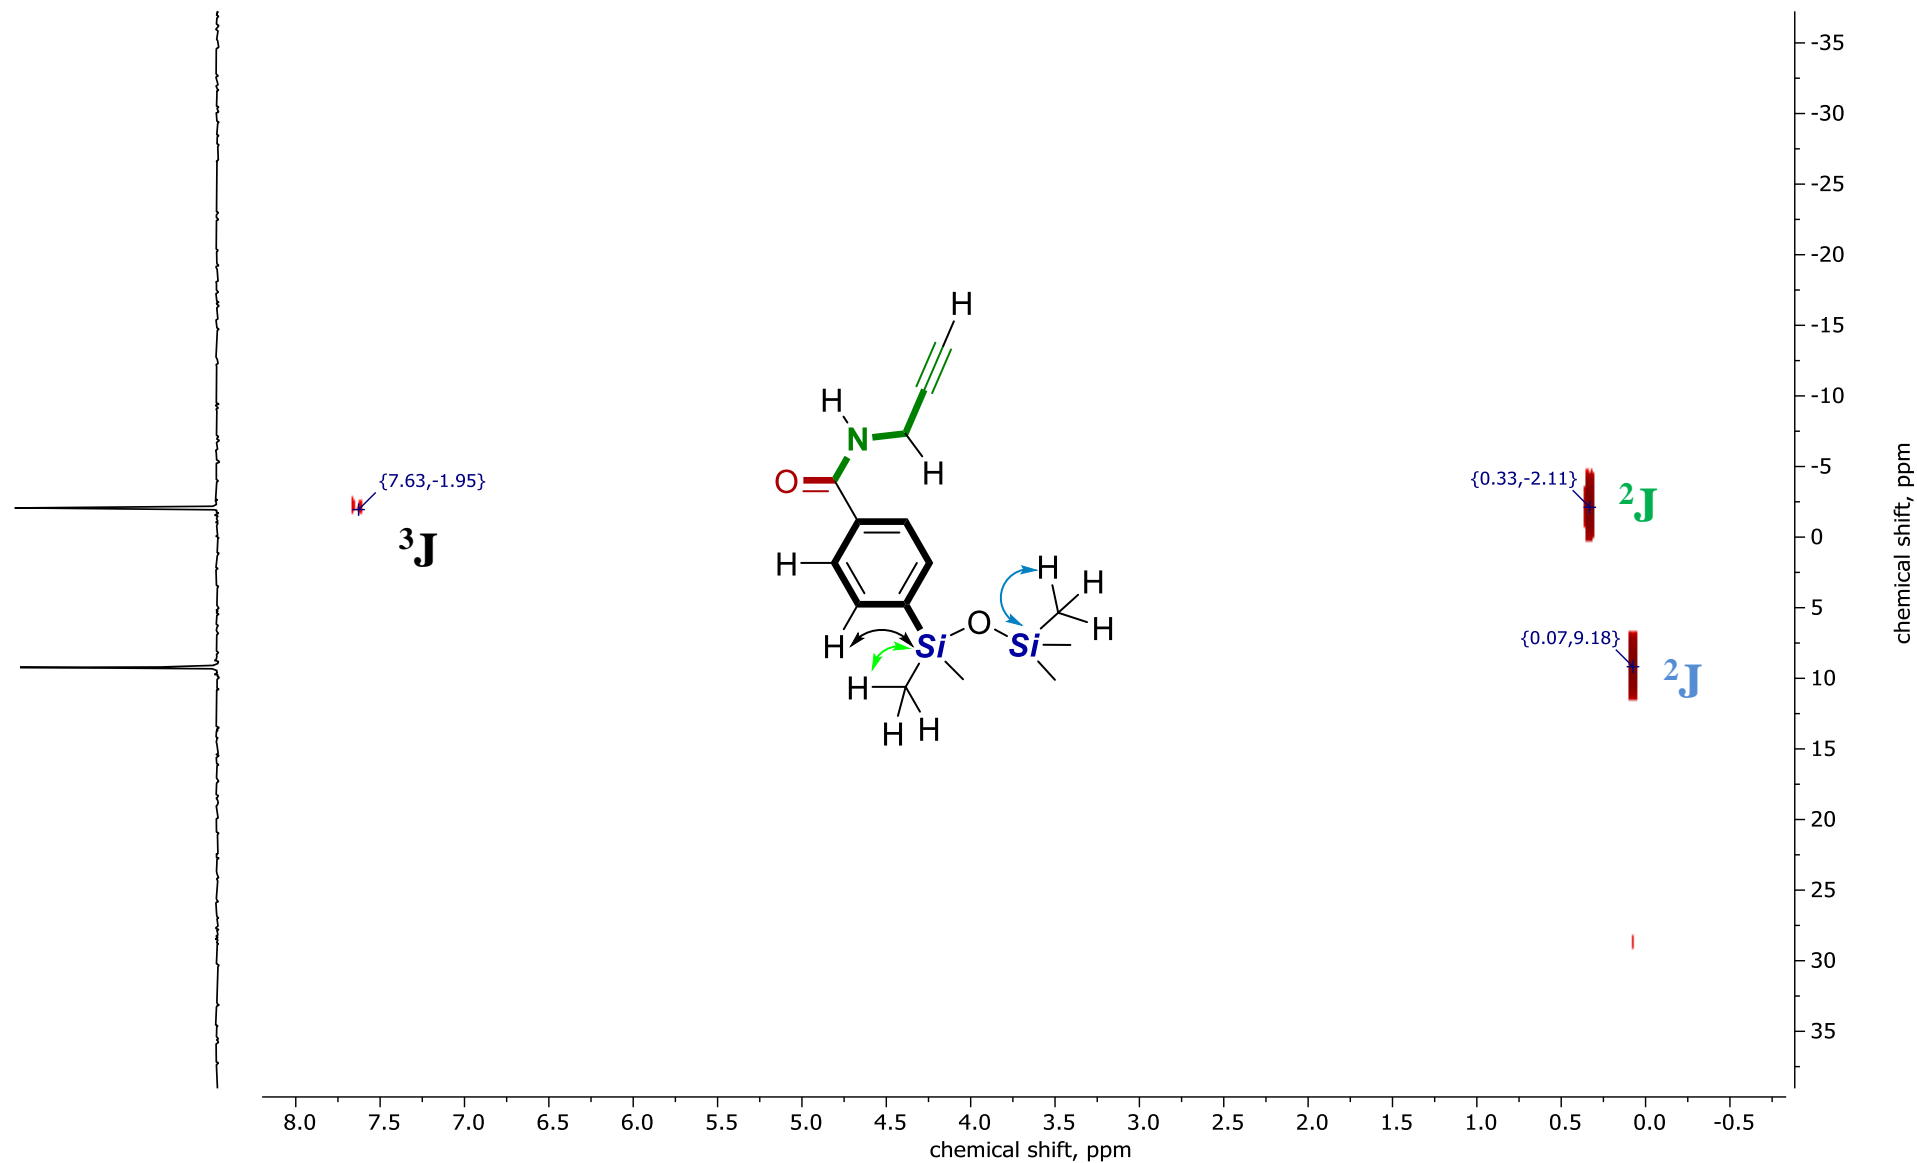

$^1\text{H} - ^{15}\text{N}$  HMBC  
(400 MHz, DMSO-d6)

S127

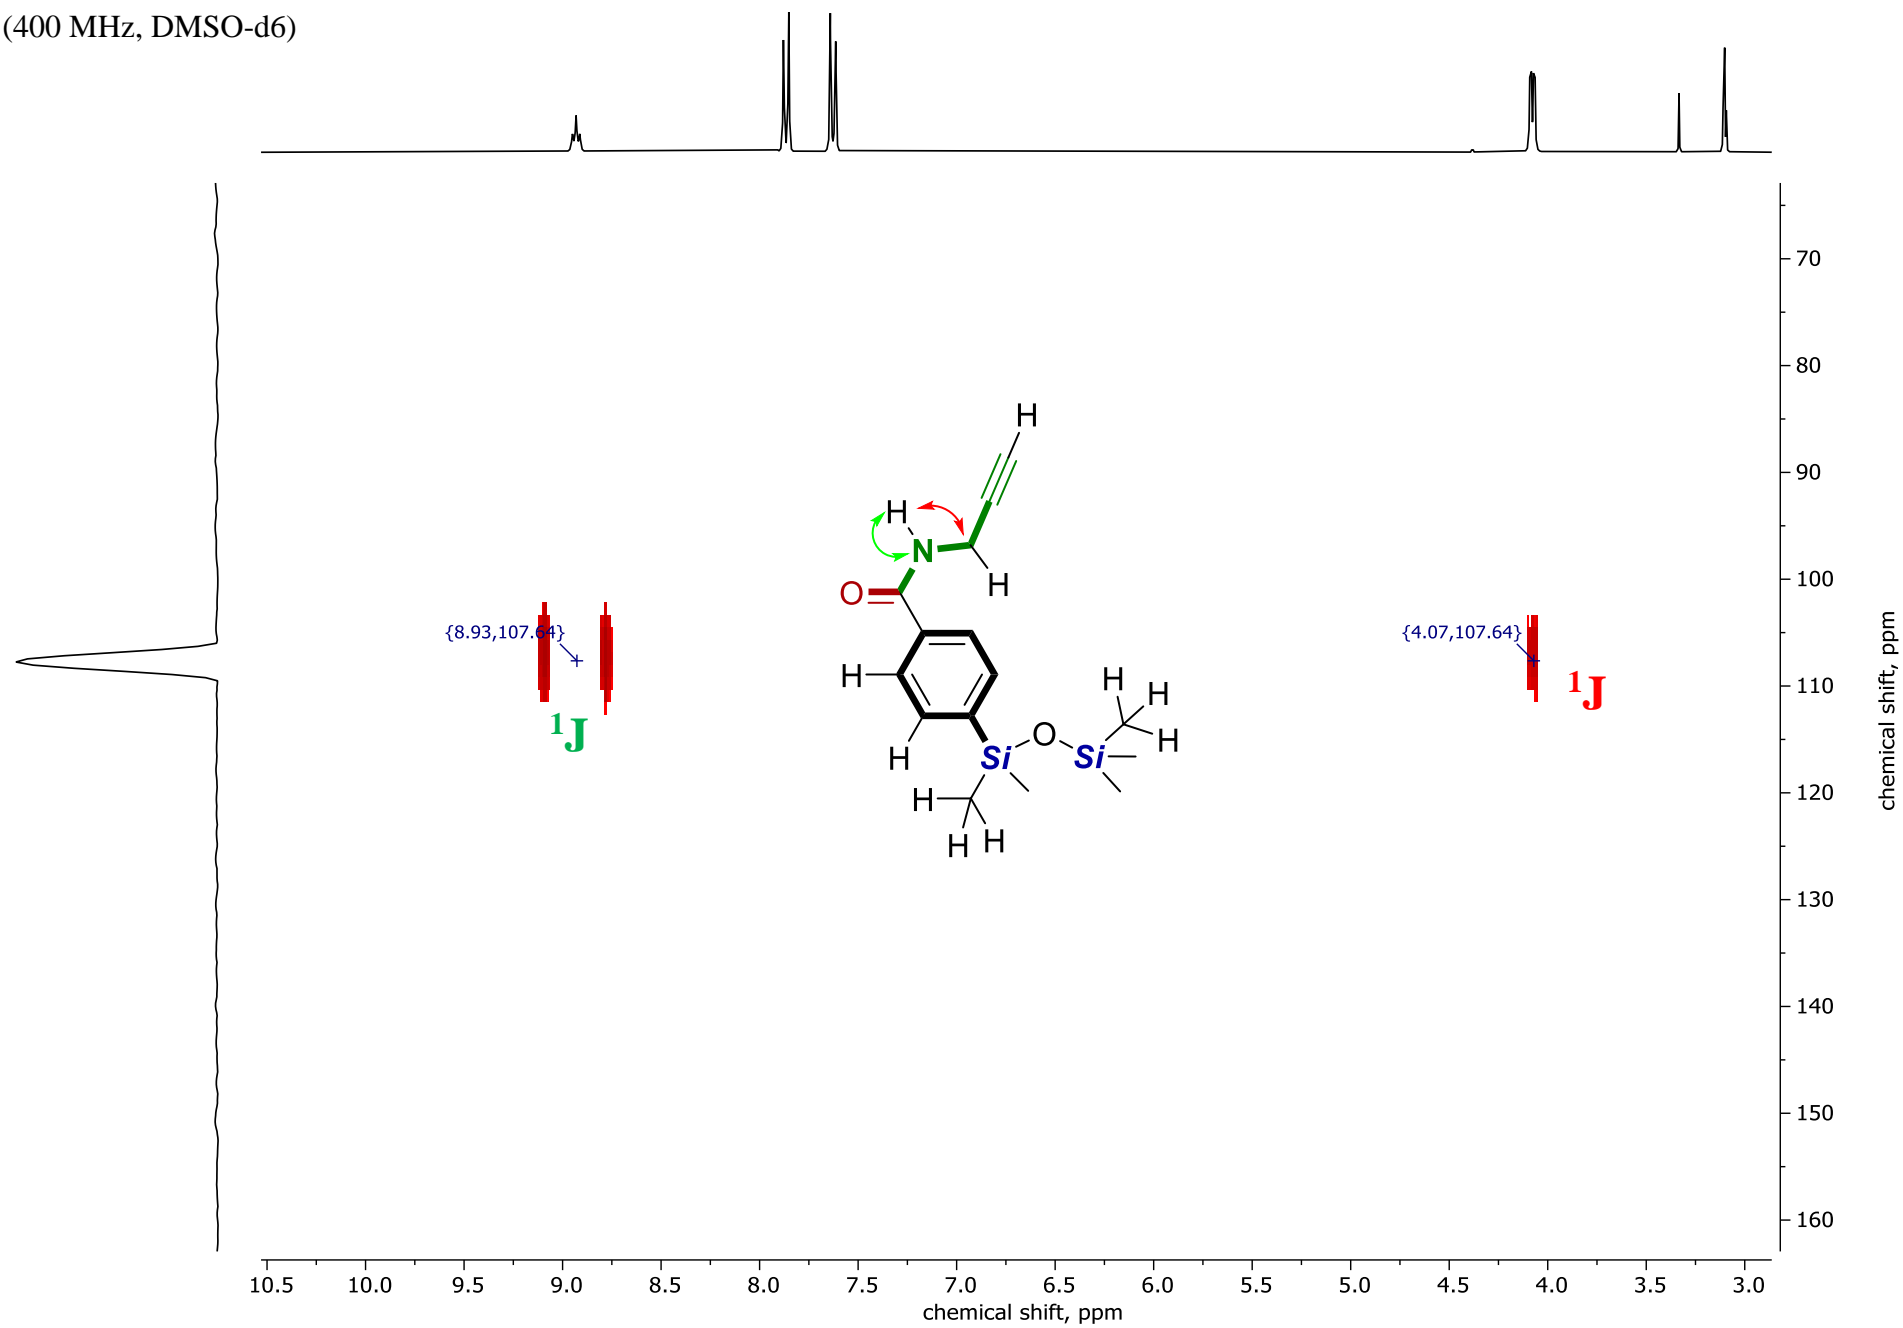

$^1\text{H} - ^{15}\text{N}$  HSQC  
(400 MHz, DMSO-d6)

S128

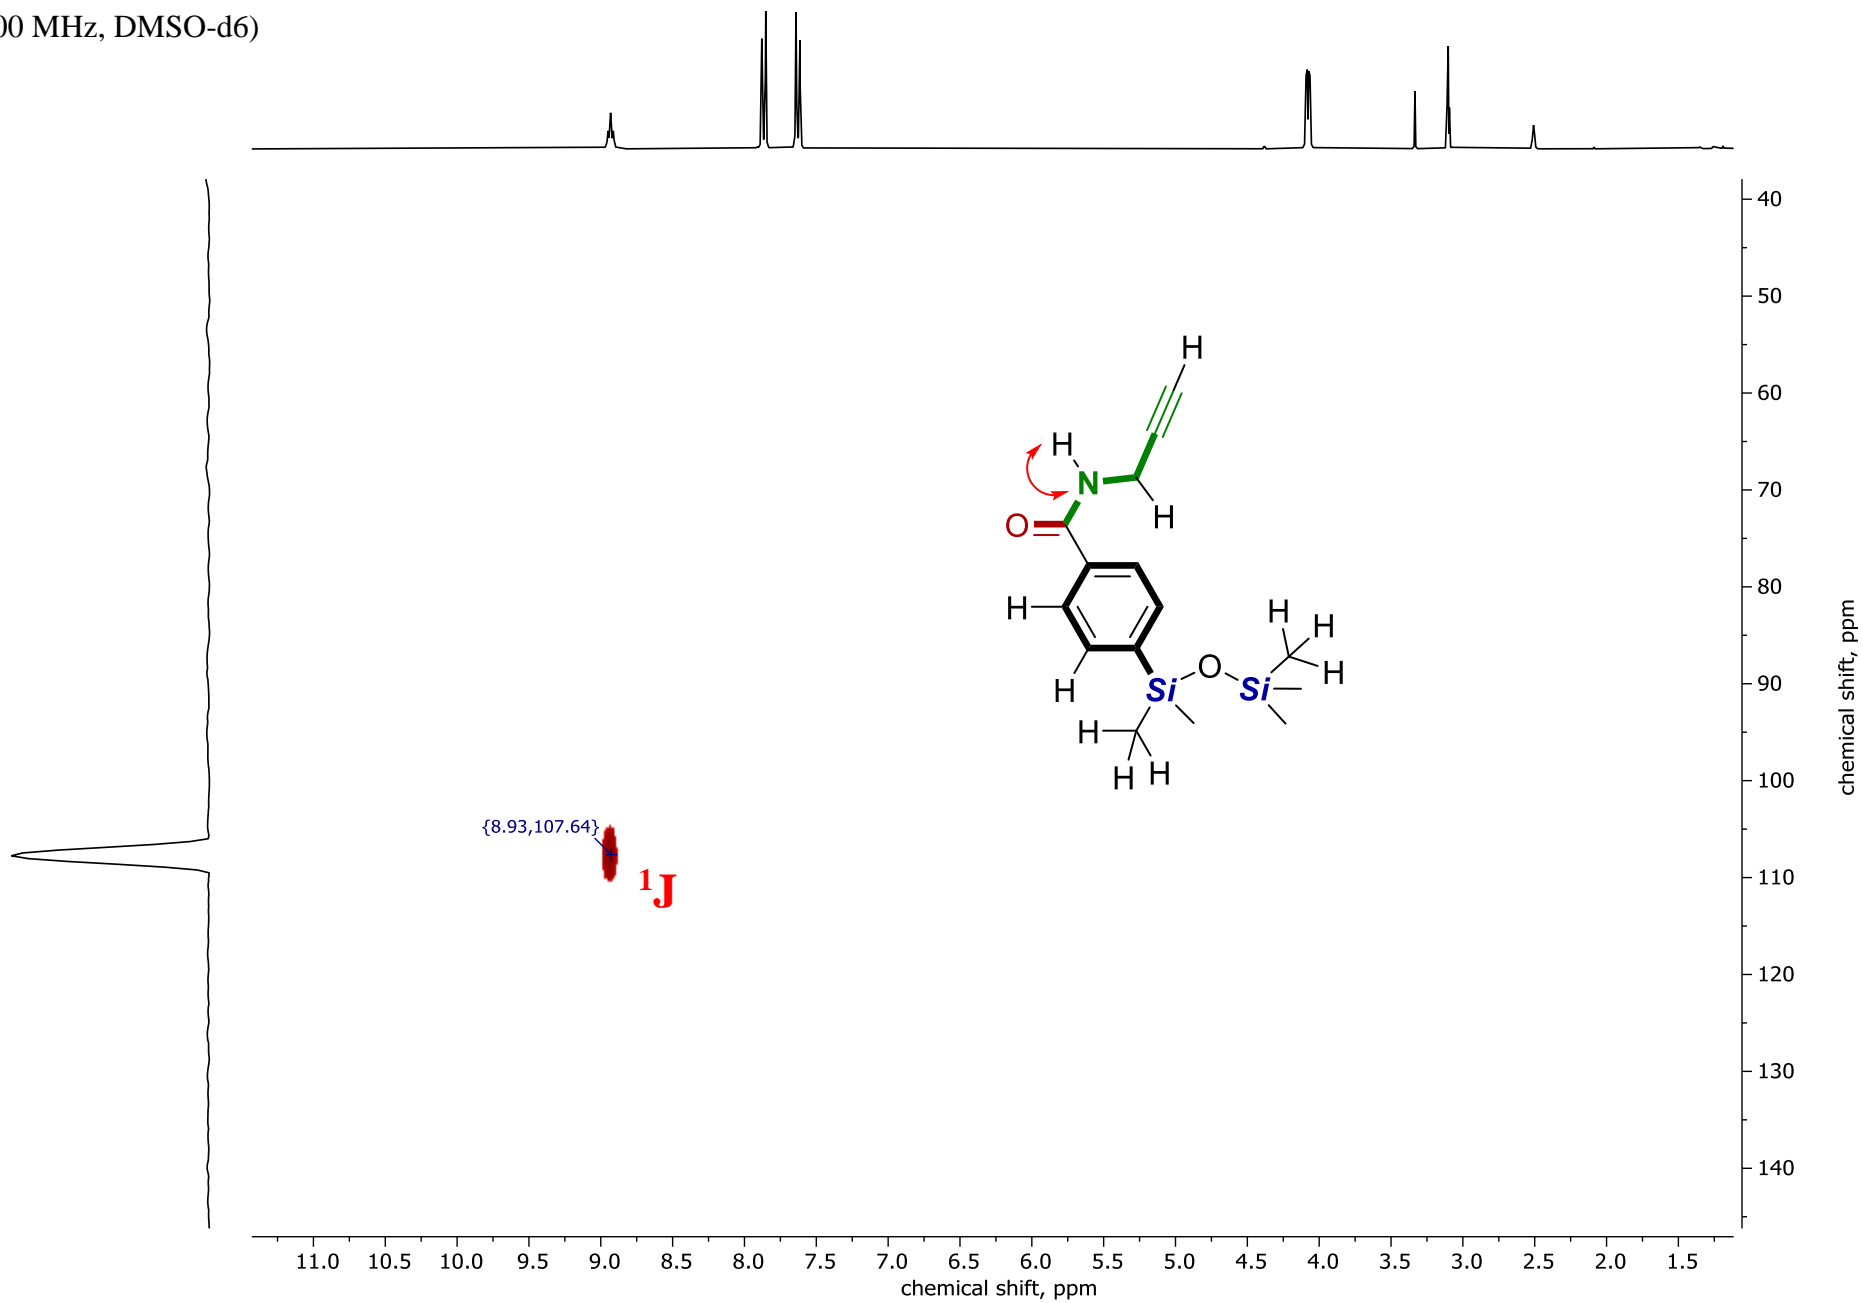



S129

IR spectrum

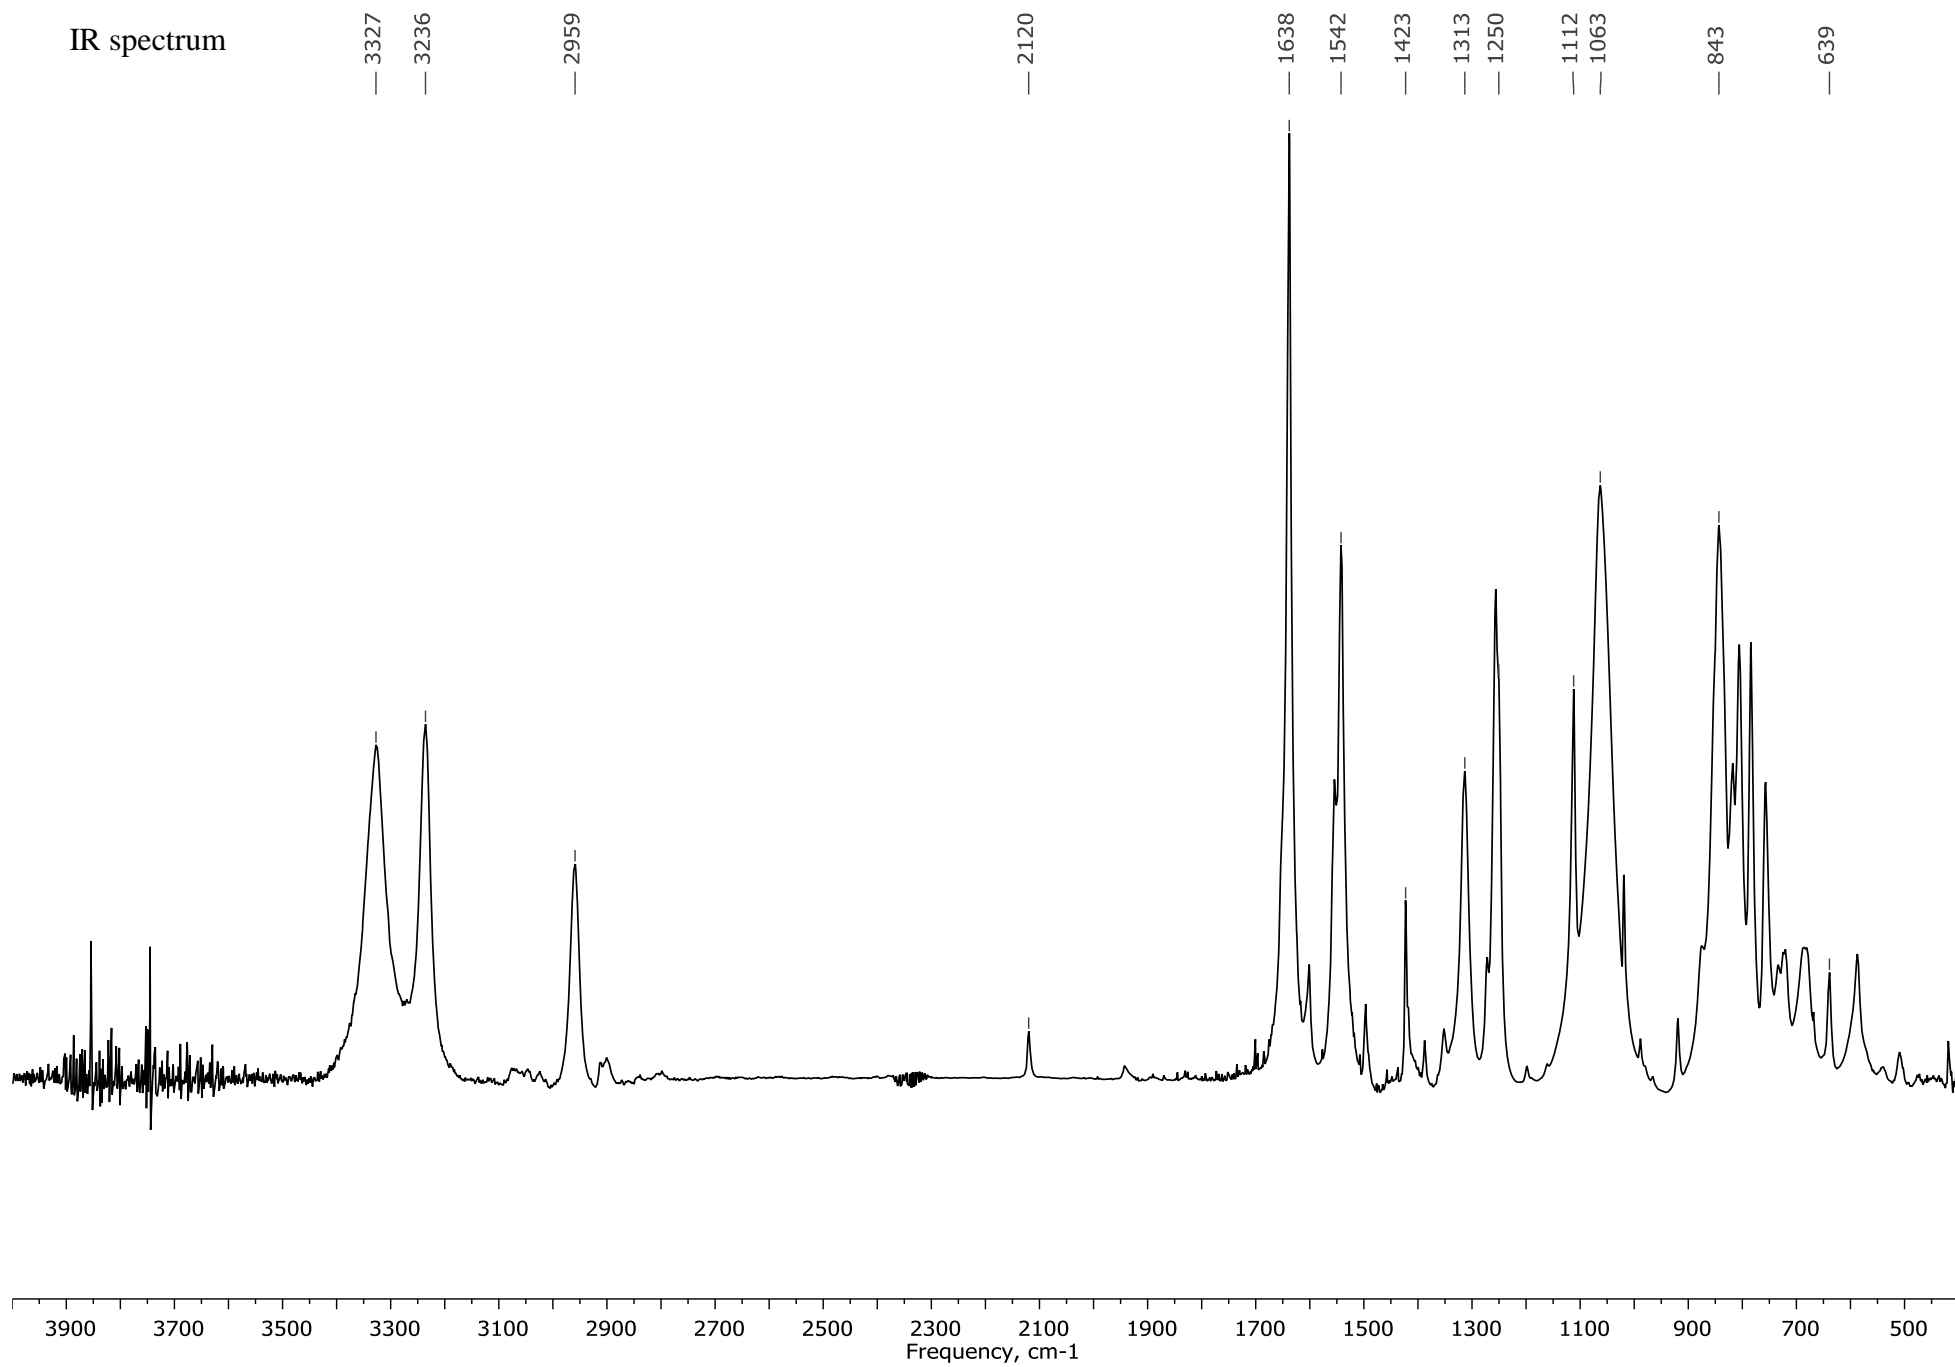

S130

HRMS (ESI)

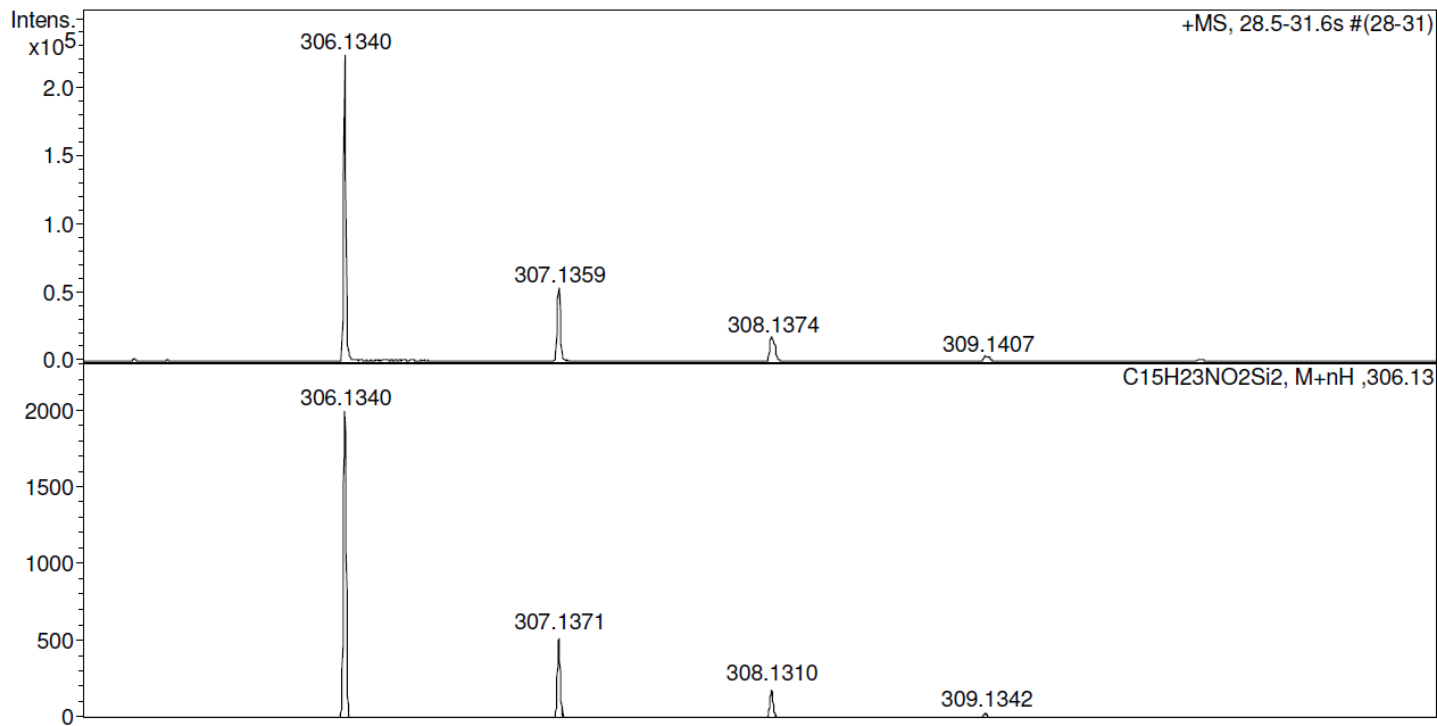

S131

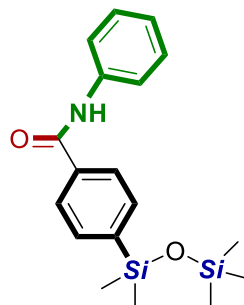

**Characterisation data for 4-(1,1,3,3,3-pentamethyldisiloxanyl)-N-phenylbenzamide:**

$^1\text{H}$  NMR (400 MHz, DMSO):  $\delta = 10.25$  (s, 1H),  $\delta = 7.96$  (d,  $^3J=11$ , 2H),  $\delta = 7.80$  (d,  $^3J=11$ , 2H),  $\delta = 7.69$  (d,  $^3J=11$ , 2H),  $\delta = 7.35$  (t,  $^3J=10$ , 2H),  $\delta = 7.10$  (t,  $^3J=10$ , 1H),  $\delta = 0.35$  (s, 6H),  $\delta = 0.10$  (s, 9H).  $^{13}\text{C}$  NMR (100 MHz, DMSO):  $\delta = 165.56$ , 143.37, 139.16, 135.83, 132.70, 128.53, 126.78, 123.58, 120.27, 1.93, 0.68.  $^{29}\text{Si}$  NMR (80 MHz, DMSO):  $\delta = 9.29$ , -2.07.  $^{15}\text{N}$  NMR (40 MHz, DMSO):  $\delta = 128.85$ . HRMS (ESI)  $m/z$   $[\text{M} + \text{H}]^+$ : calcd for  $[\text{C}_{18}\text{H}_{25}\text{NO}_2\text{Si}_2 + \text{H}]^+$ , 344.1497; found, 344.1505. IR ( $\text{cm}^{-1}$ ): 3305, 2956, 1640, 1602, 1540, 1496, 1444, 1330, 1253, 1082, 840-637.

<sup>1</sup>H NMR

(400 MHz, DMSO-d6)

S132

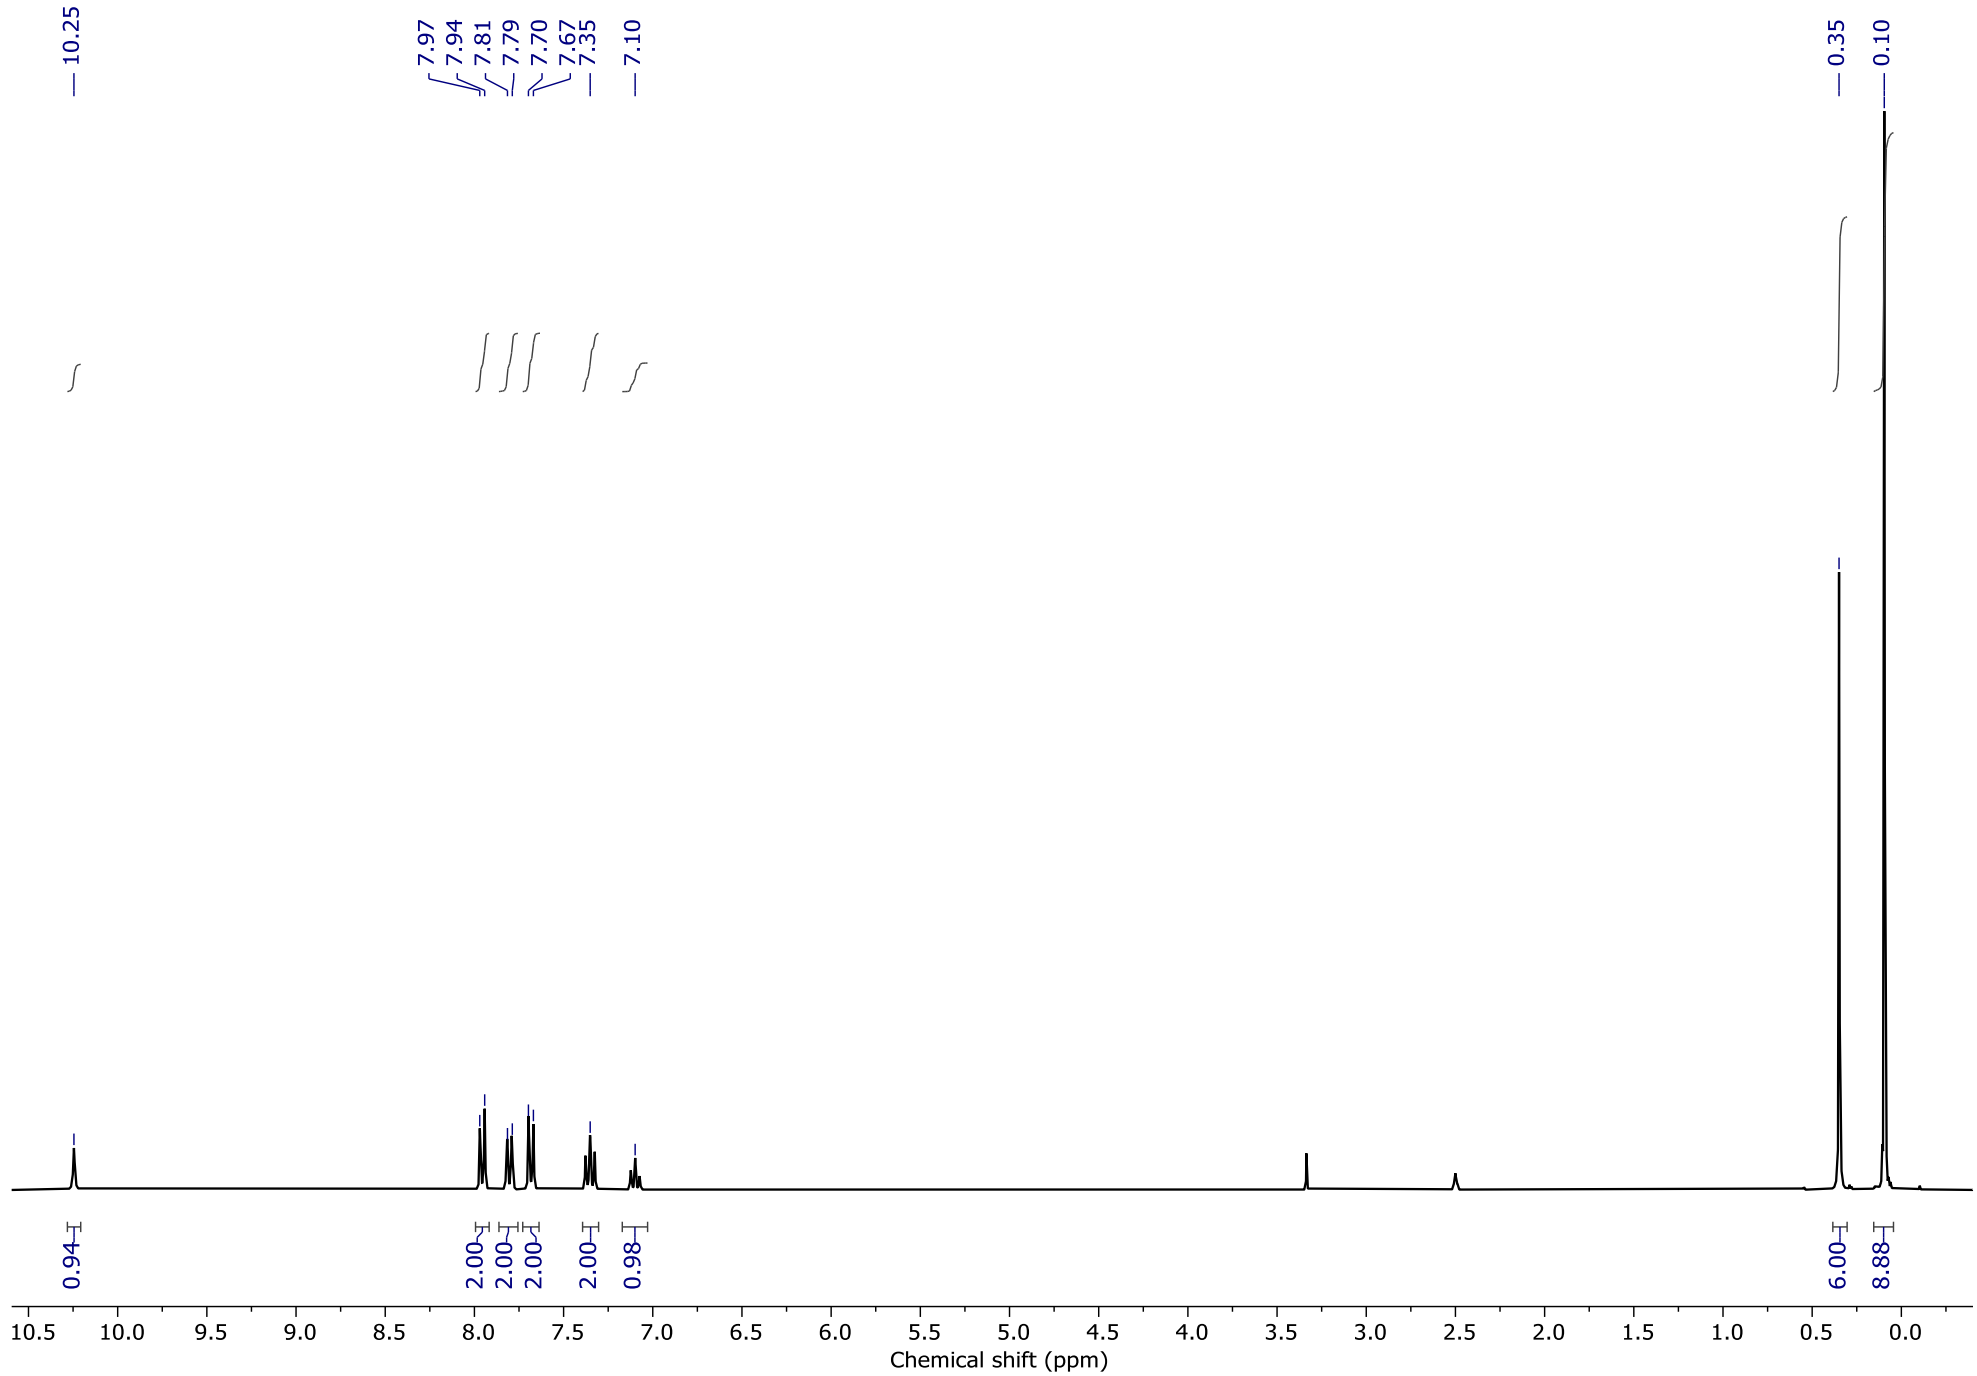

<sup>13</sup>C NMR

(100 MHz, DMSO-d6)

S133

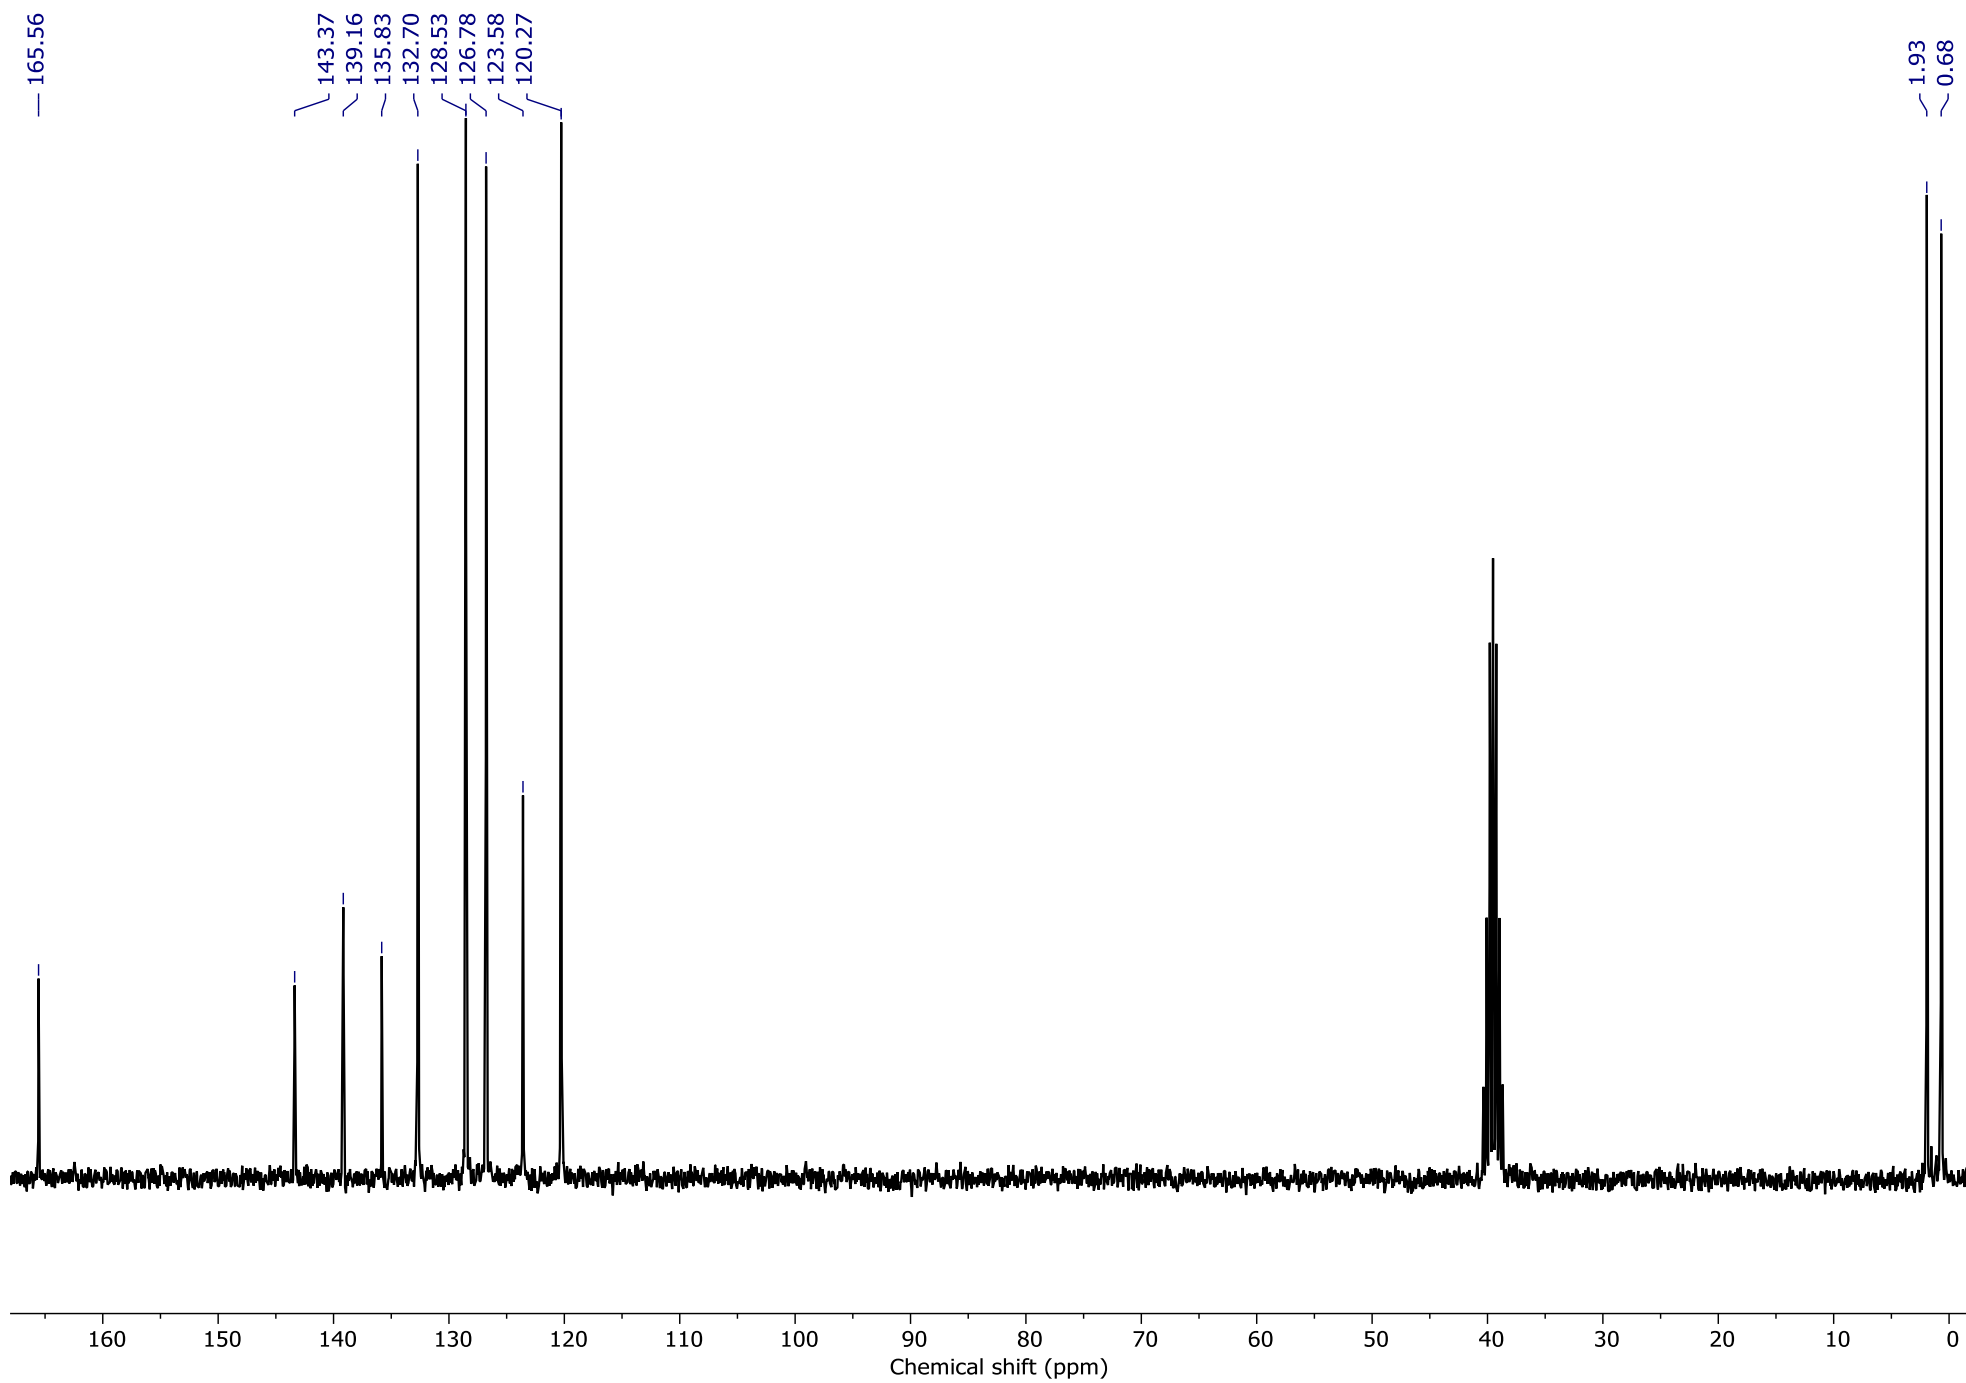

$^{29}\text{Si}$  NMR  
(80 MHz, DMSO-d<sub>6</sub>)

S134

9.29  
-2.07

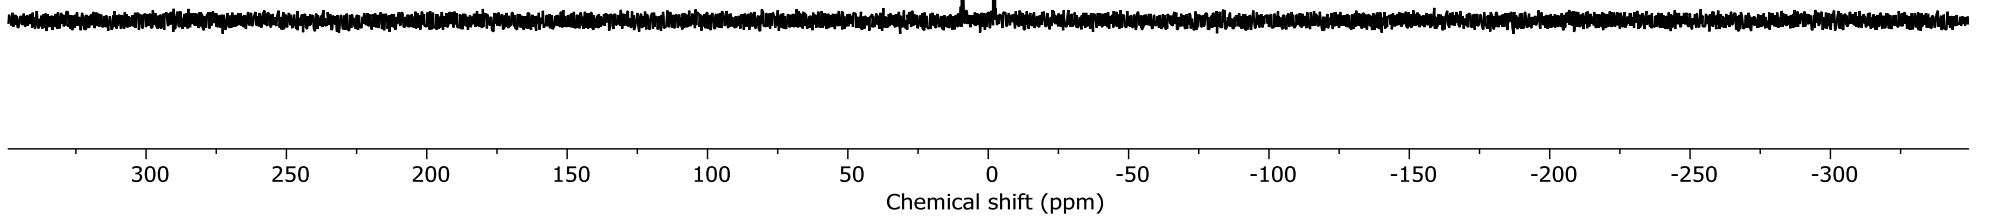

$^{15}\text{N}$  NMR  
(reconstructed, 40 MHz,  
DMSO-d<sub>6</sub>)

S135

128.85

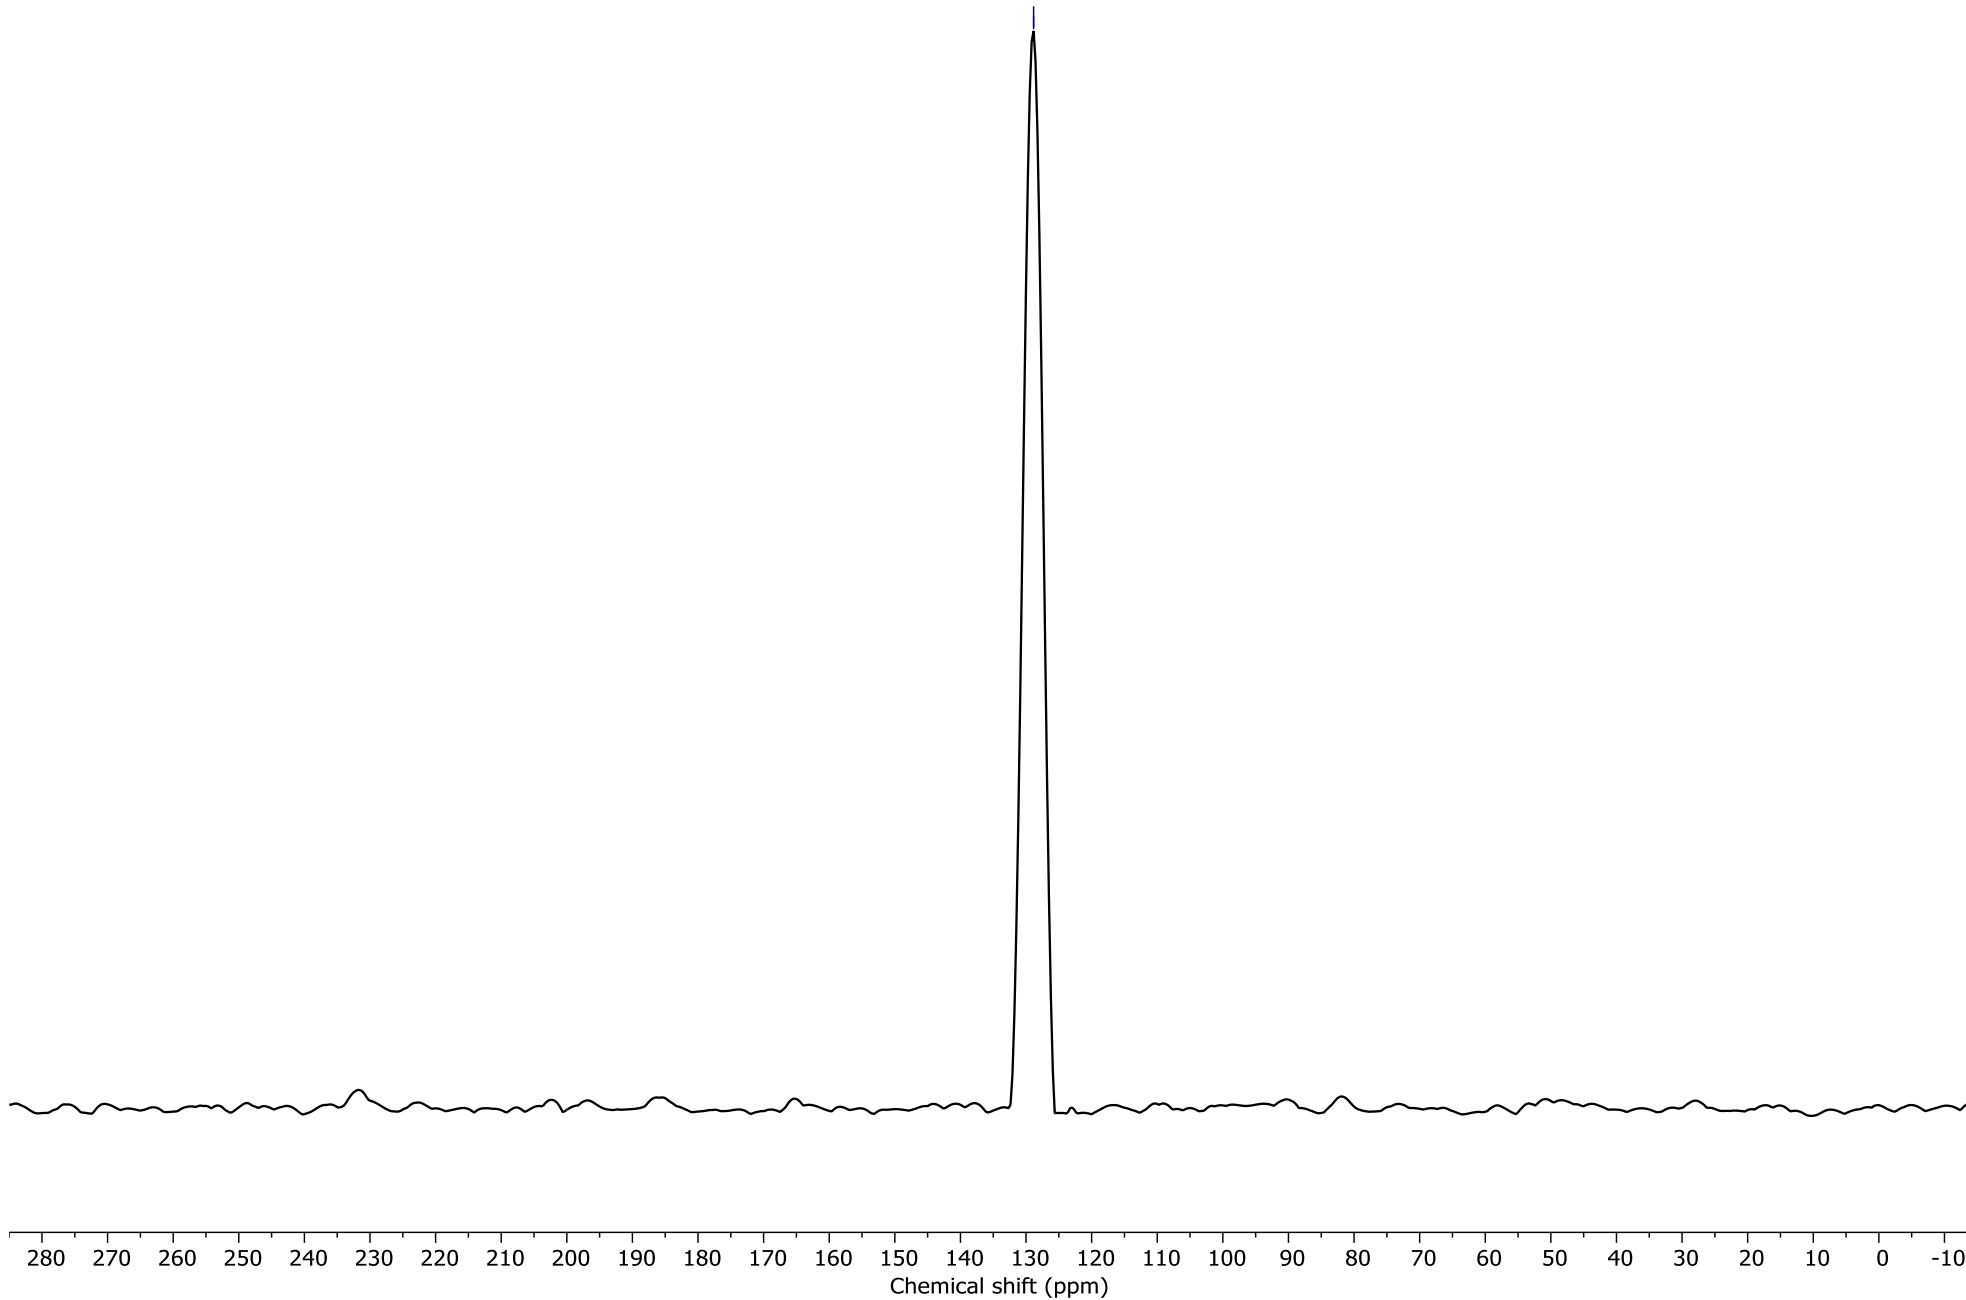

$^1\text{H} - ^{13}\text{C}$  HMBC  
(400 MHz, DMSO-d<sub>6</sub>)

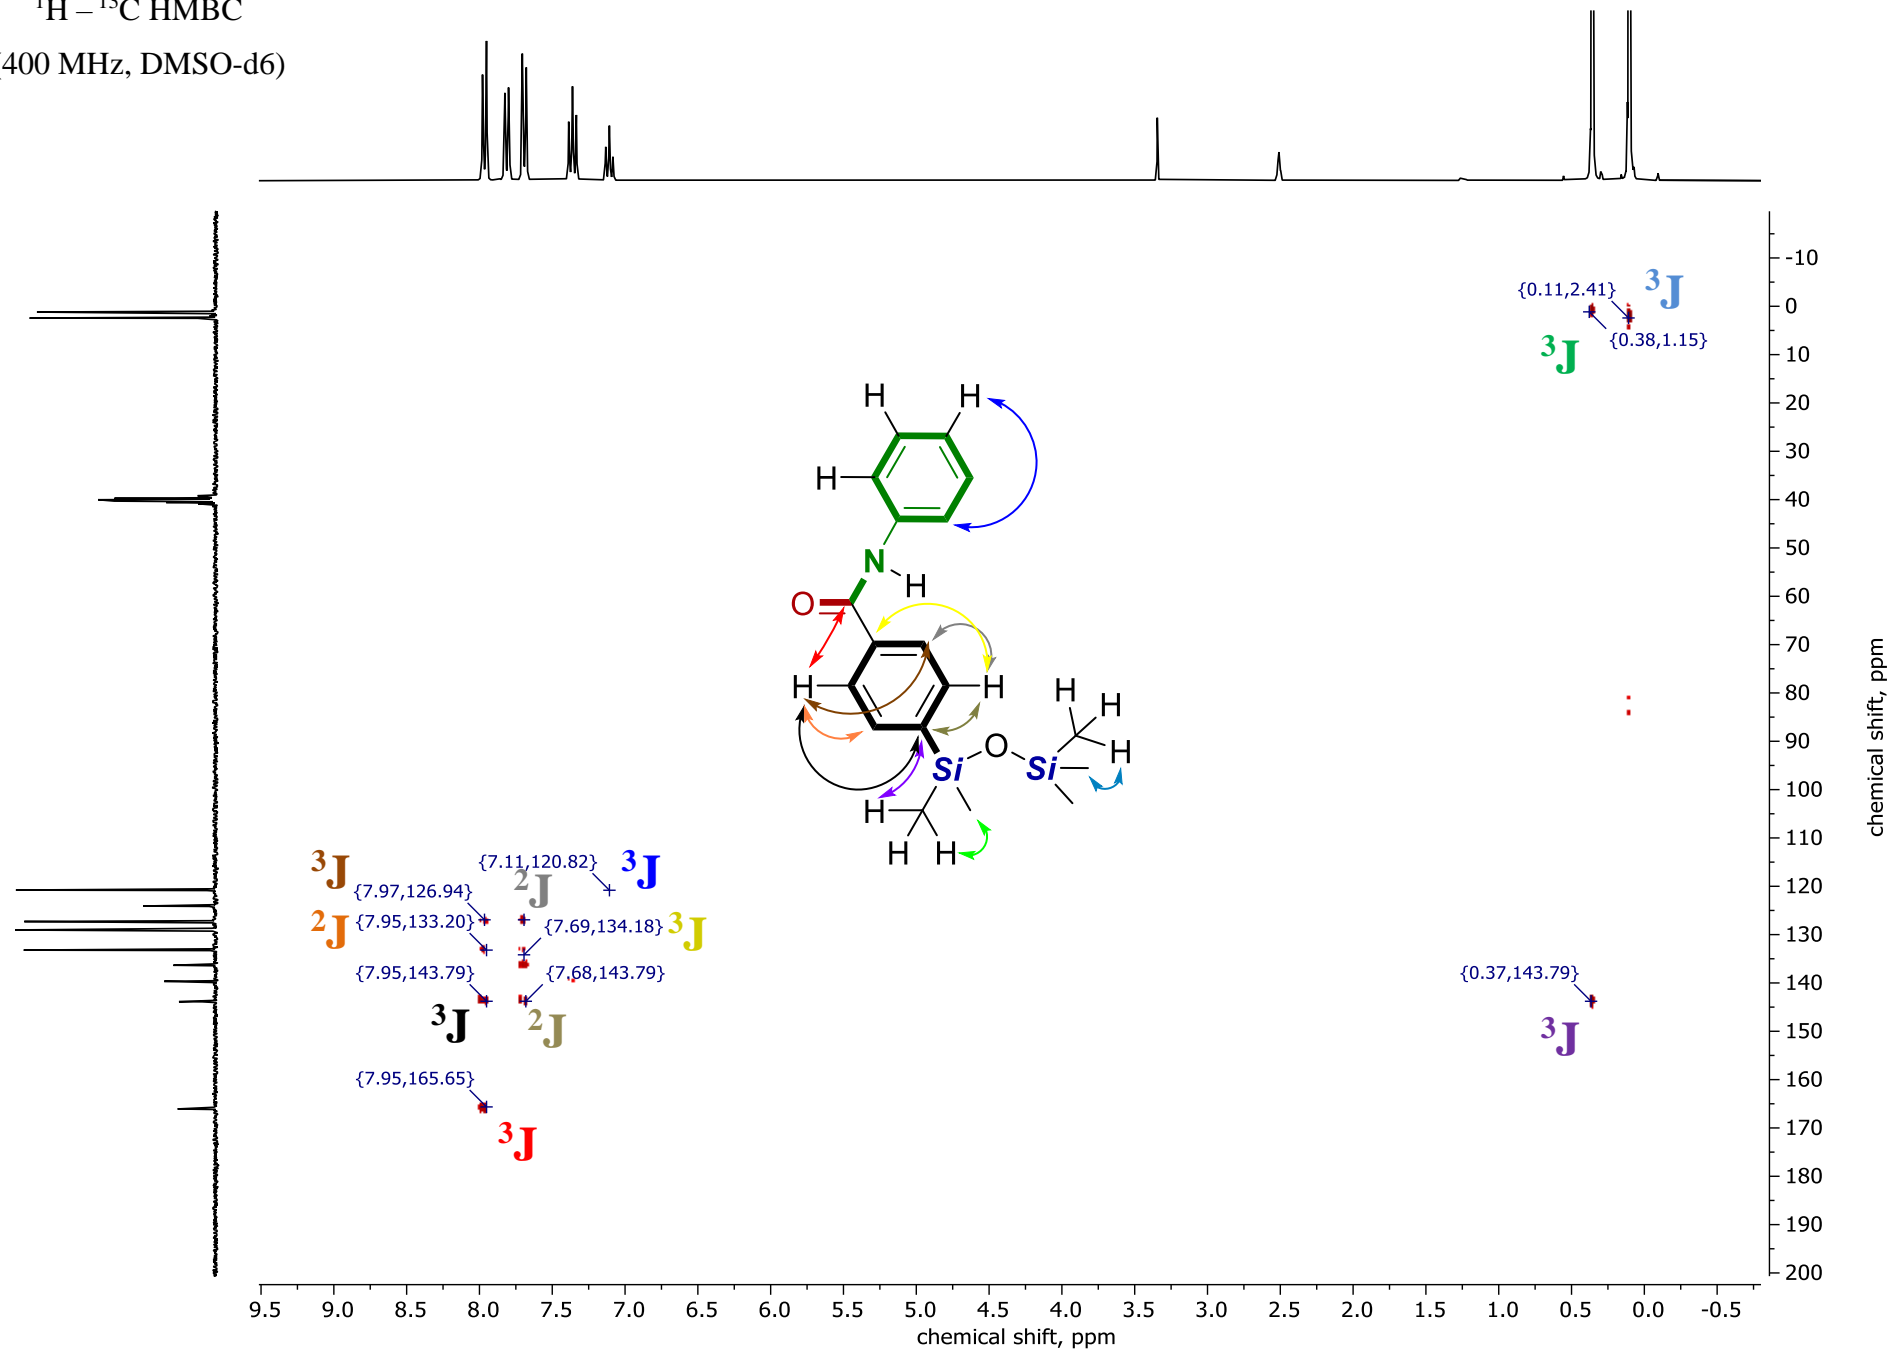



S137

$^1\text{H} - ^{13}\text{C}$  HSQC  
(400 MHz, DMSO-d<sub>6</sub>)

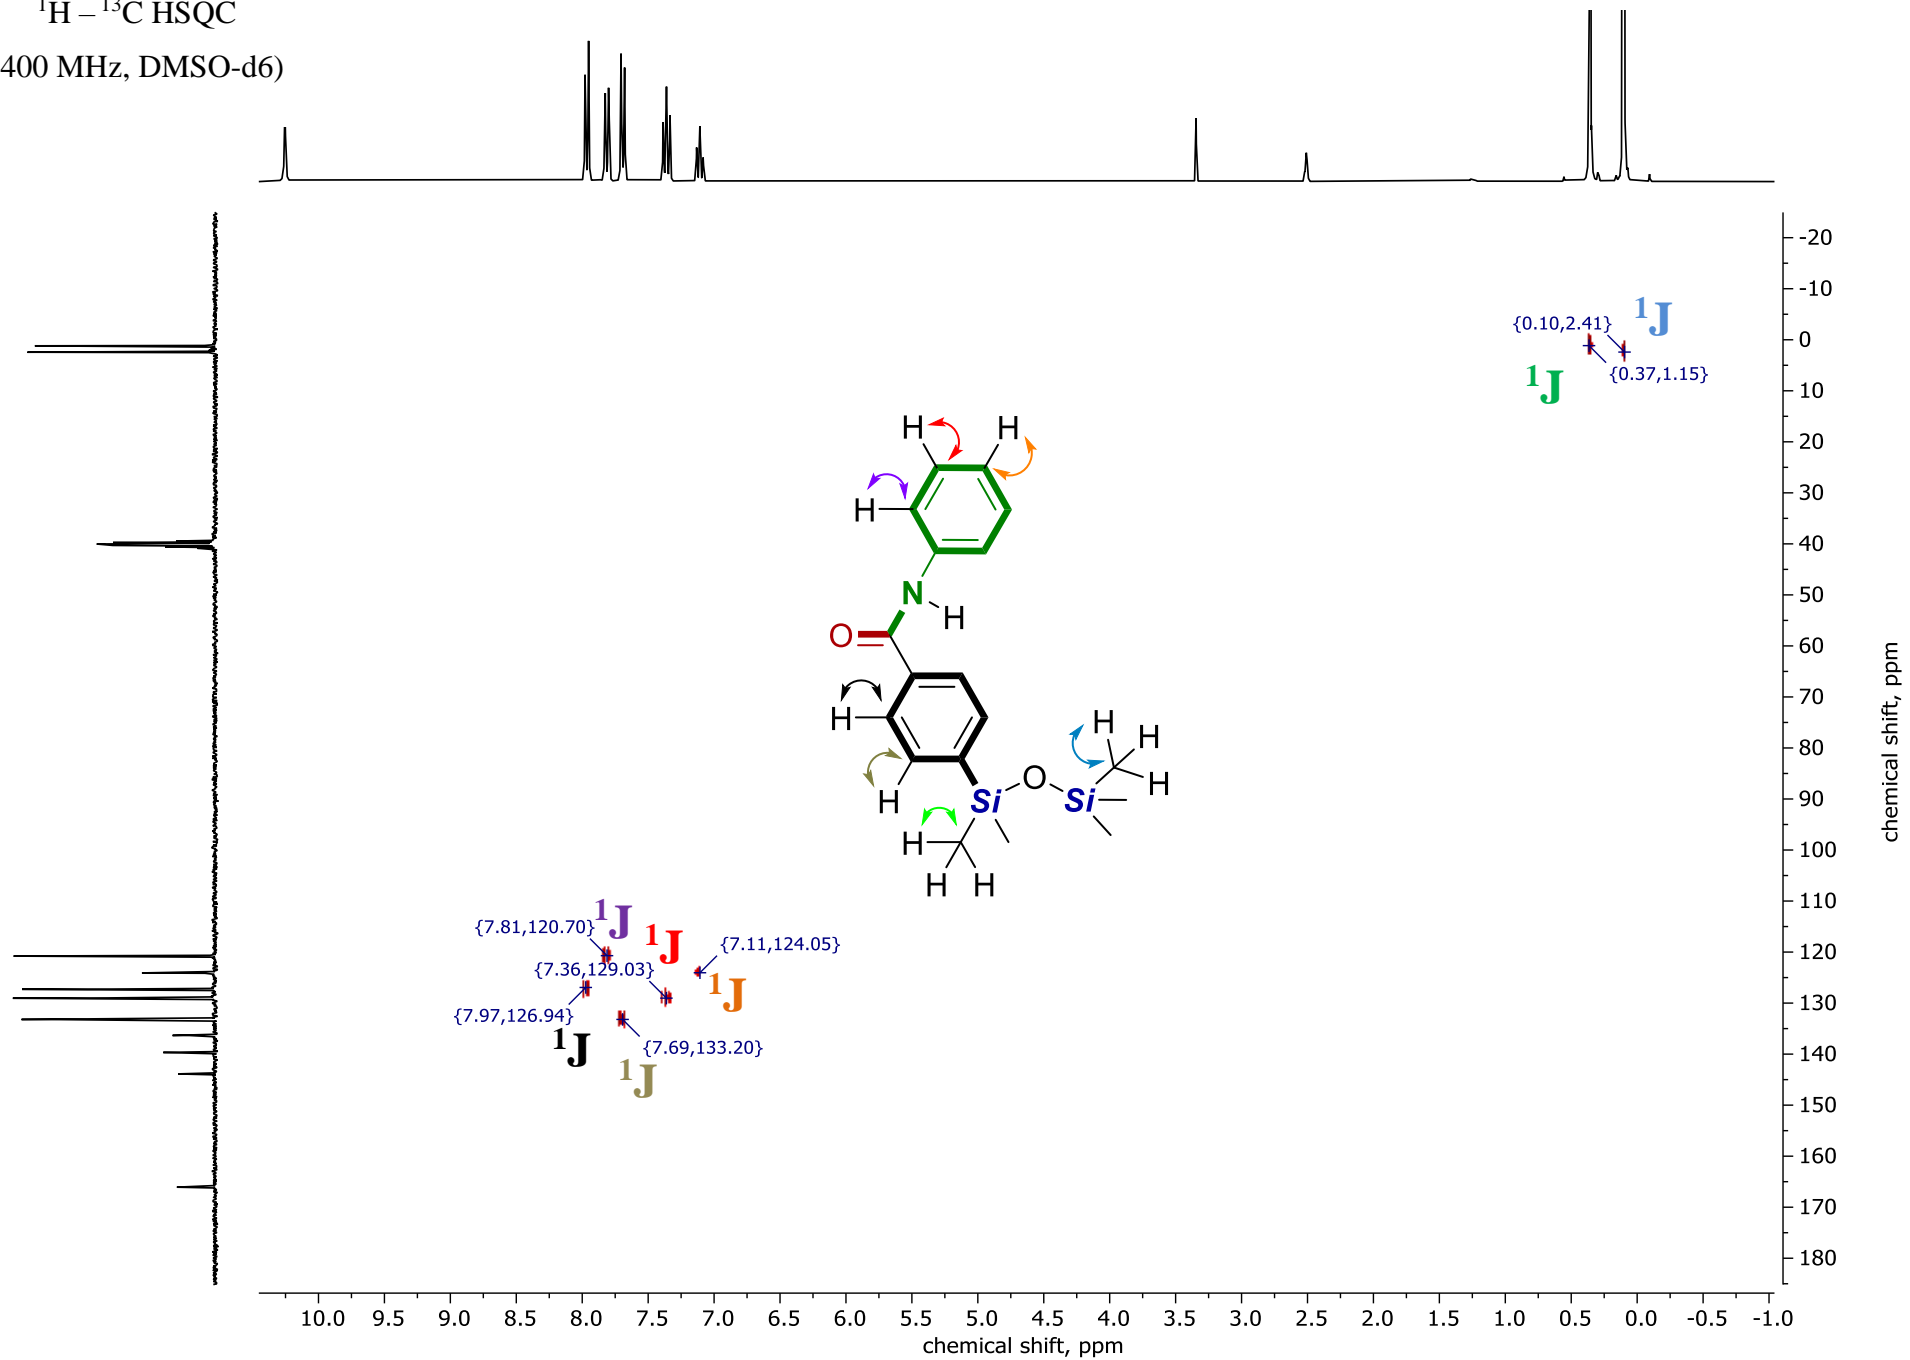

$^1\text{H} - ^{29}\text{Si}$  HMBC

S138

(400 MHz, DMSO-d<sub>6</sub>)

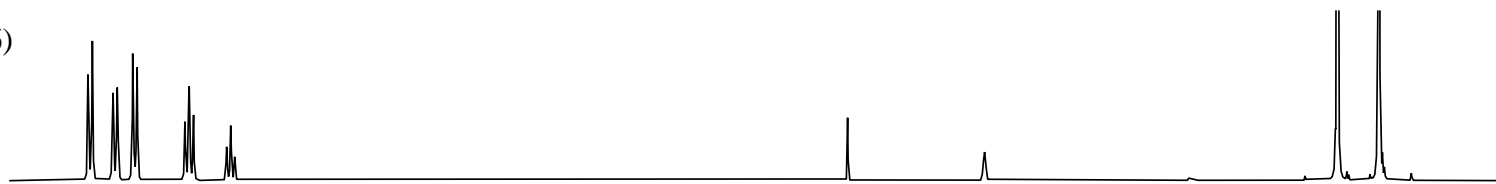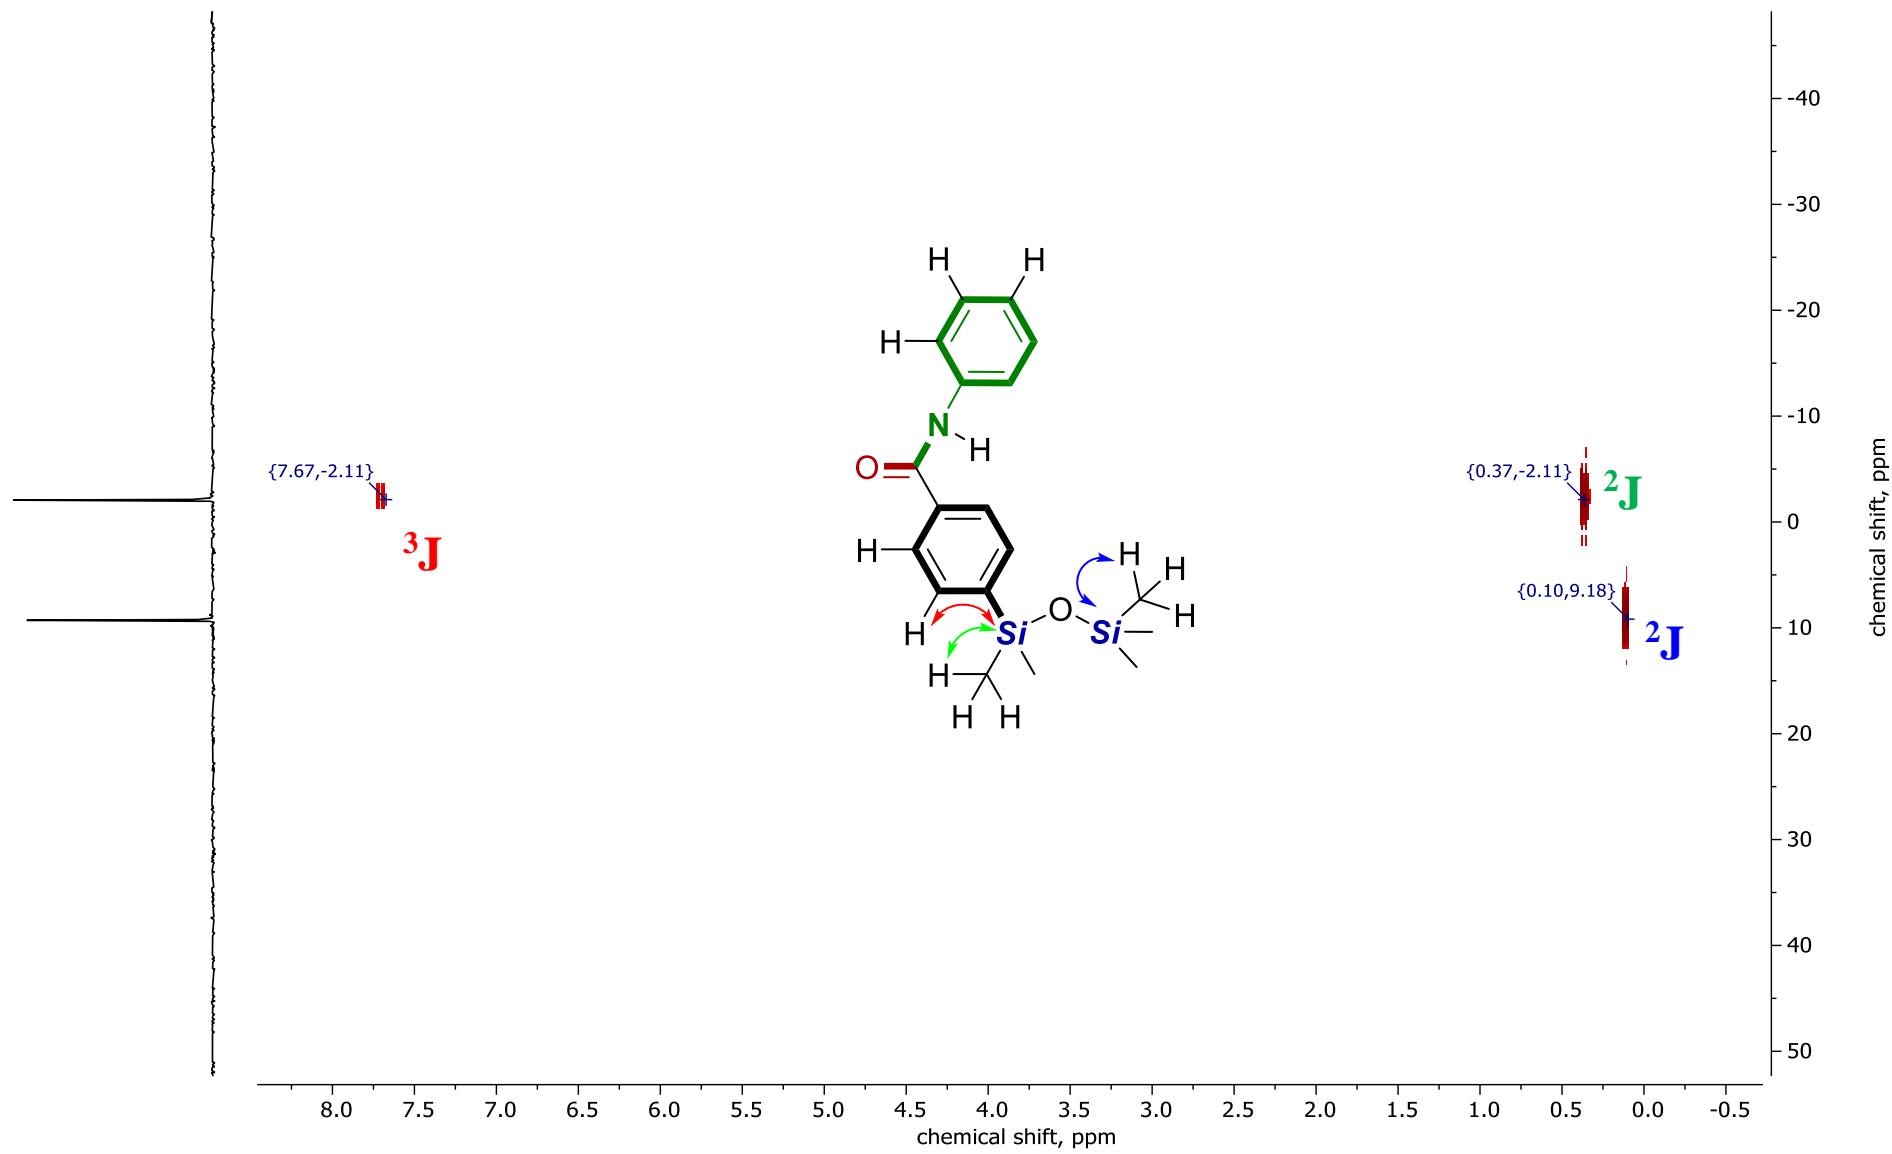

$^1\text{H} - ^{15}\text{N}$  HMBC  
(400 MHz, DMSO-d6)

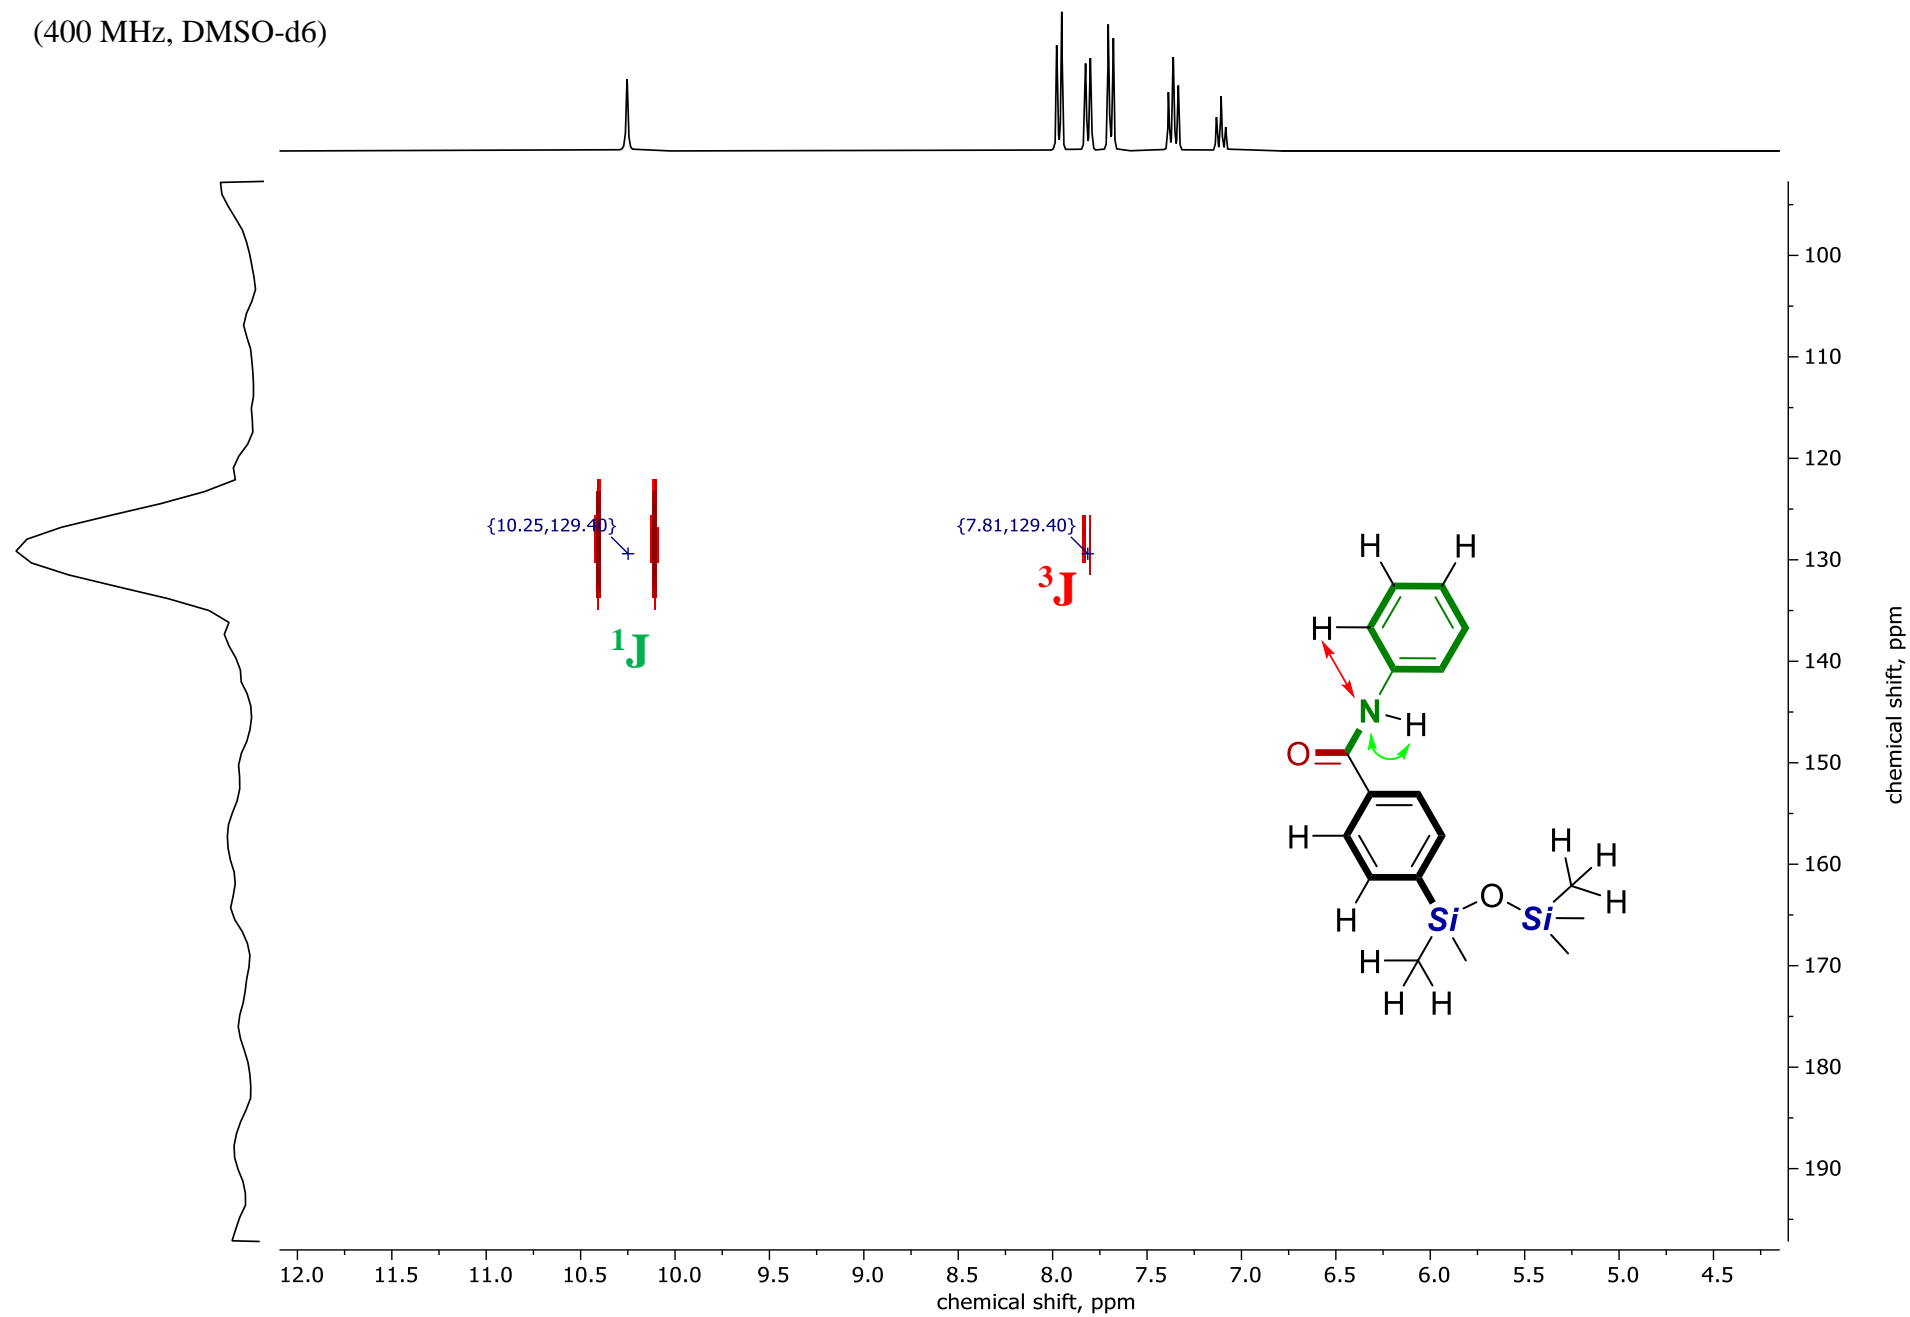

$^1\text{H} - ^{15}\text{N}$  HSQC  
(400 MHz, DMSO-d<sub>6</sub>)

S140

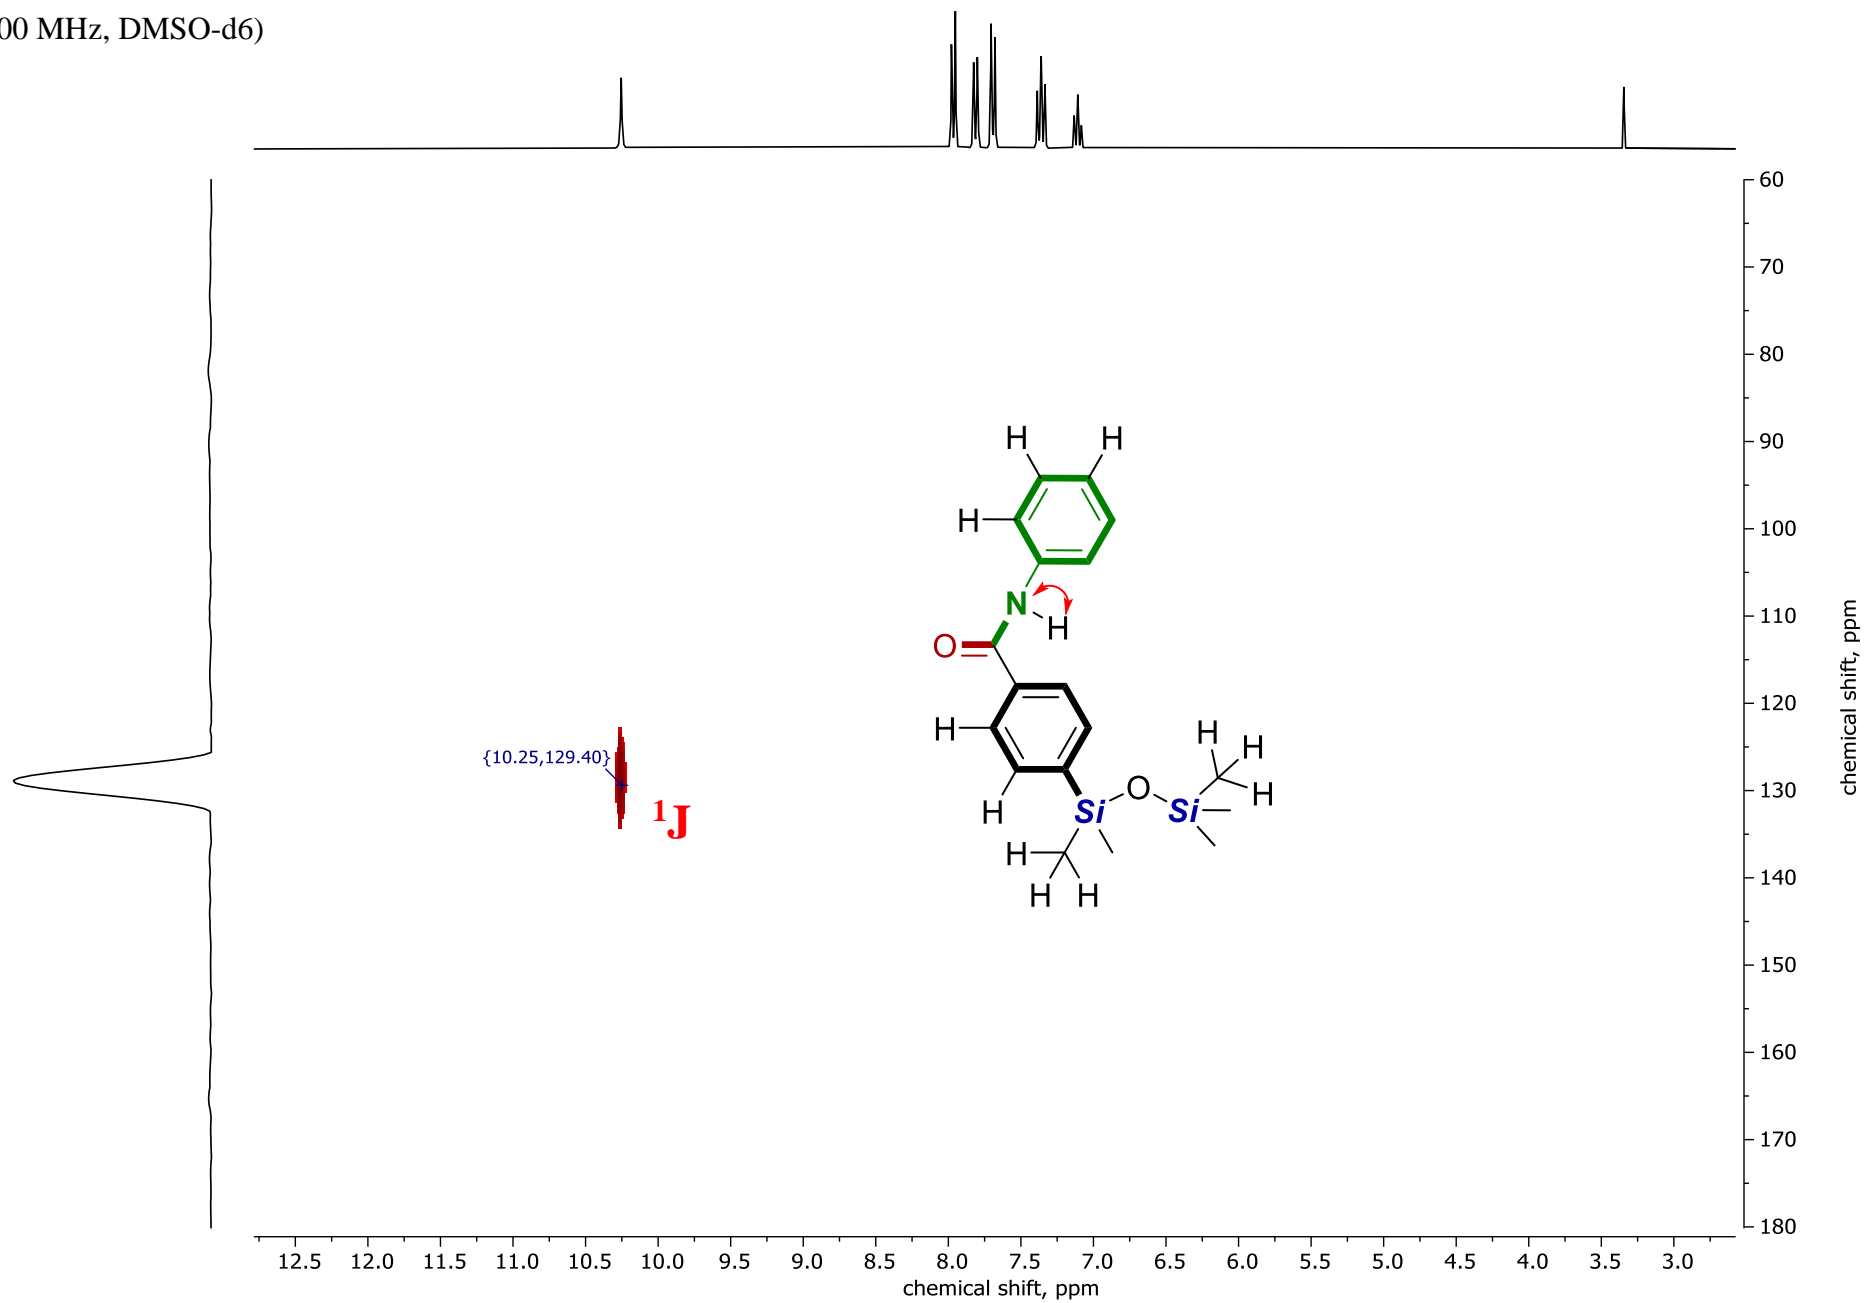

S141

IR spectrum

— 3305

— 2956

~ 1640

~ 1602

~ 1540

~ 1496

~ 1444

— 1330

— 1253

— 1082

— 840

— 637

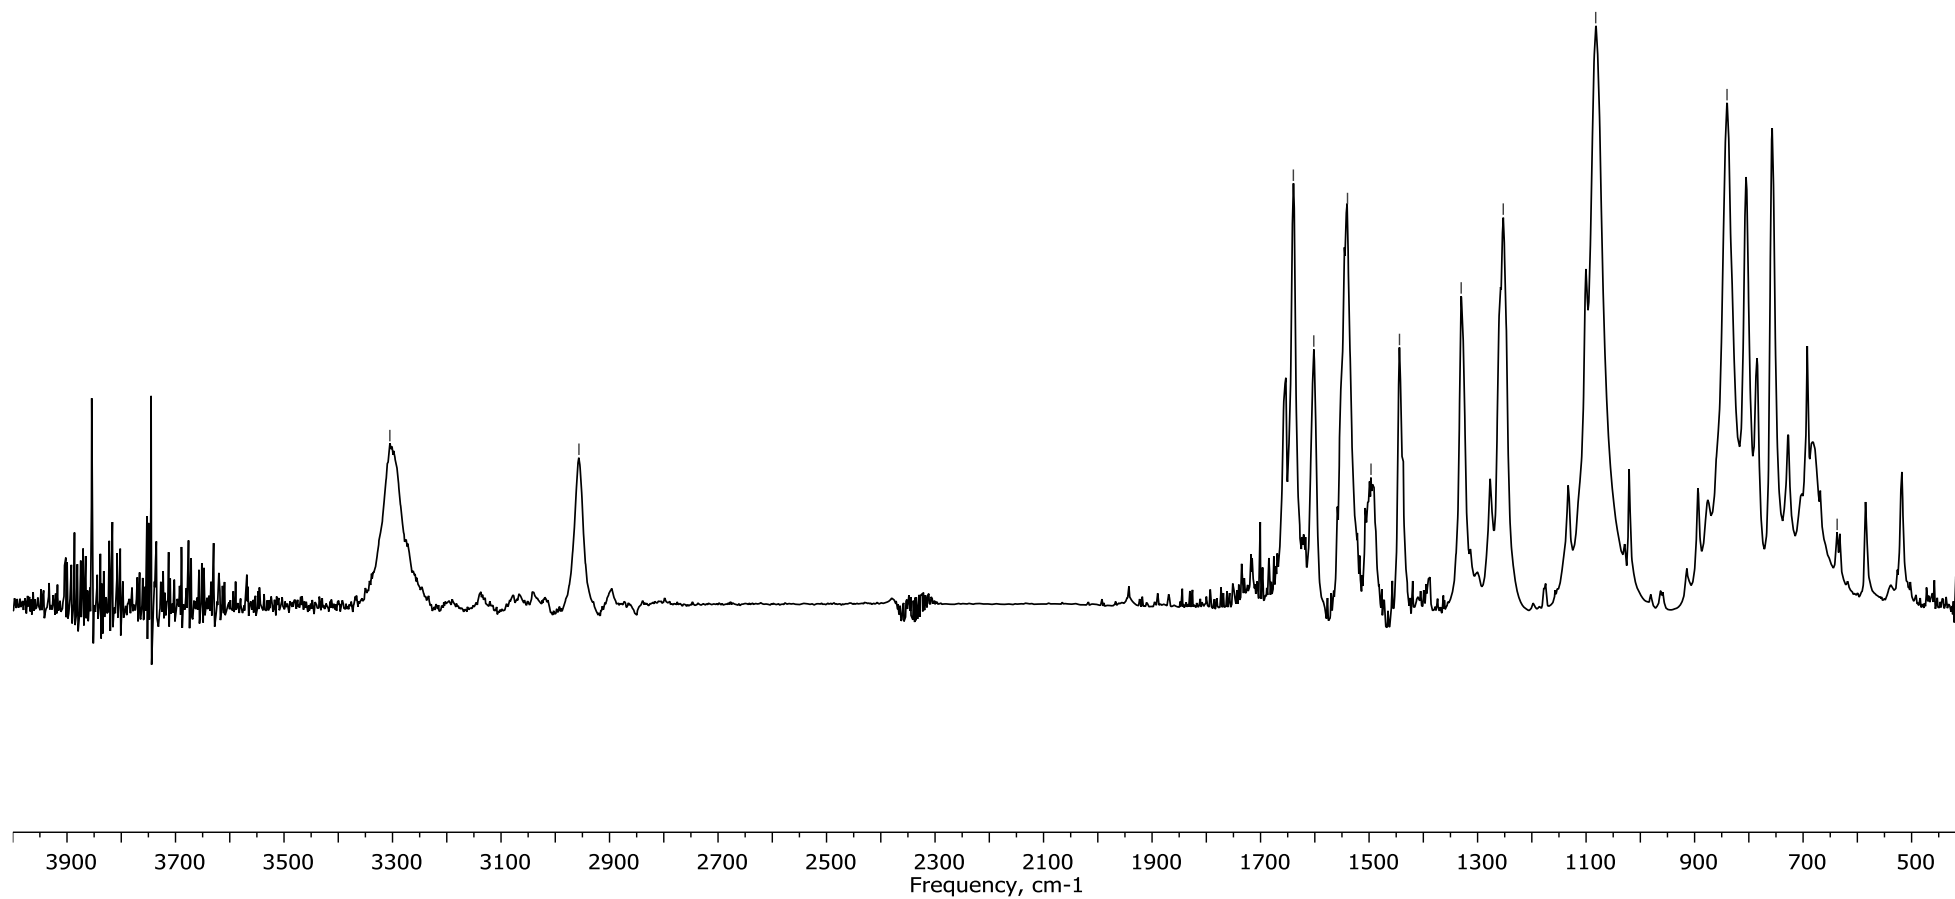

S142

HRMS (ESI)

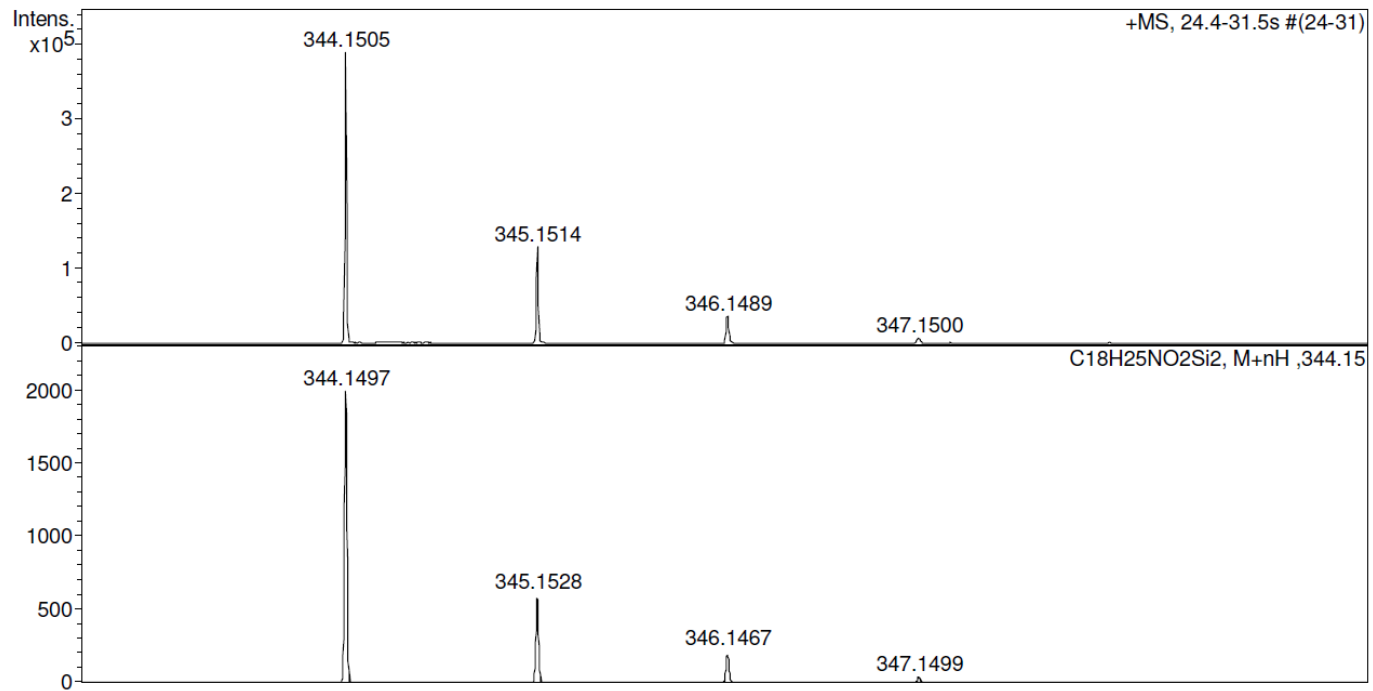

S143

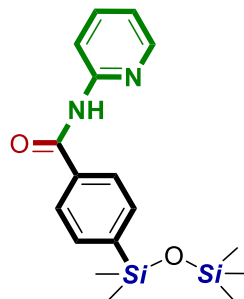

**Characterisation data for 4-(1,1,3,3,3-pentamethyldisiloxanyl)-N-(pyridin-2-yl)benzamide:**

$^1\text{H}$  NMR (400 MHz, DMSO):  $\delta$  = 10.75 (s, 1H),  $\delta$  = 8.35 (m, 1H),  $\delta$  = 8.18 (d,  $^3\text{J}$ =8 Hz, 1H),  $\delta$  = 7.99 (d,  $^3\text{J}$ =8 Hz, 2H),  $\delta$  = 7.80 (t,  $^3\text{J}$ =8 Hz, 1H),  $\delta$  = 7.62 (d,  $^3\text{J}$ =8 Hz, 2H),  $\delta$  = 7.12 (m, 1H),  $\delta$  = 0.30 (s, 6H),  $\delta$  = 0.04 (s, 9H).  $^{13}\text{C}$  NMR (100 MHz, DMSO):  $\delta$  = 166.02, 152.20, 147.93, 143.88, 138.10, 134.90, 132.74, 127.16, 119.82, 114.71, 2.00, 0.74.  $^{29}\text{Si}$  NMR (80 MHz, DMSO):  $\delta$  = 9.31, -2.06. HRMS (ESI)  $m/z$   $[\text{M} + \text{H}]^+$ : calcd for  $[\text{C}_{17}\text{H}_{24}\text{NO}_2\text{Si}_2 + \text{H}]^+$ , 345.1449; found, 345.1452. IR ( $\text{cm}^{-1}$ ): 2958, 1675, 1584, 1539, 1442, 1313, 1253, 1313, 1253, 1077, 840-682.

<sup>1</sup>H NMR

(400 MHz, DMSO-d6)

S144

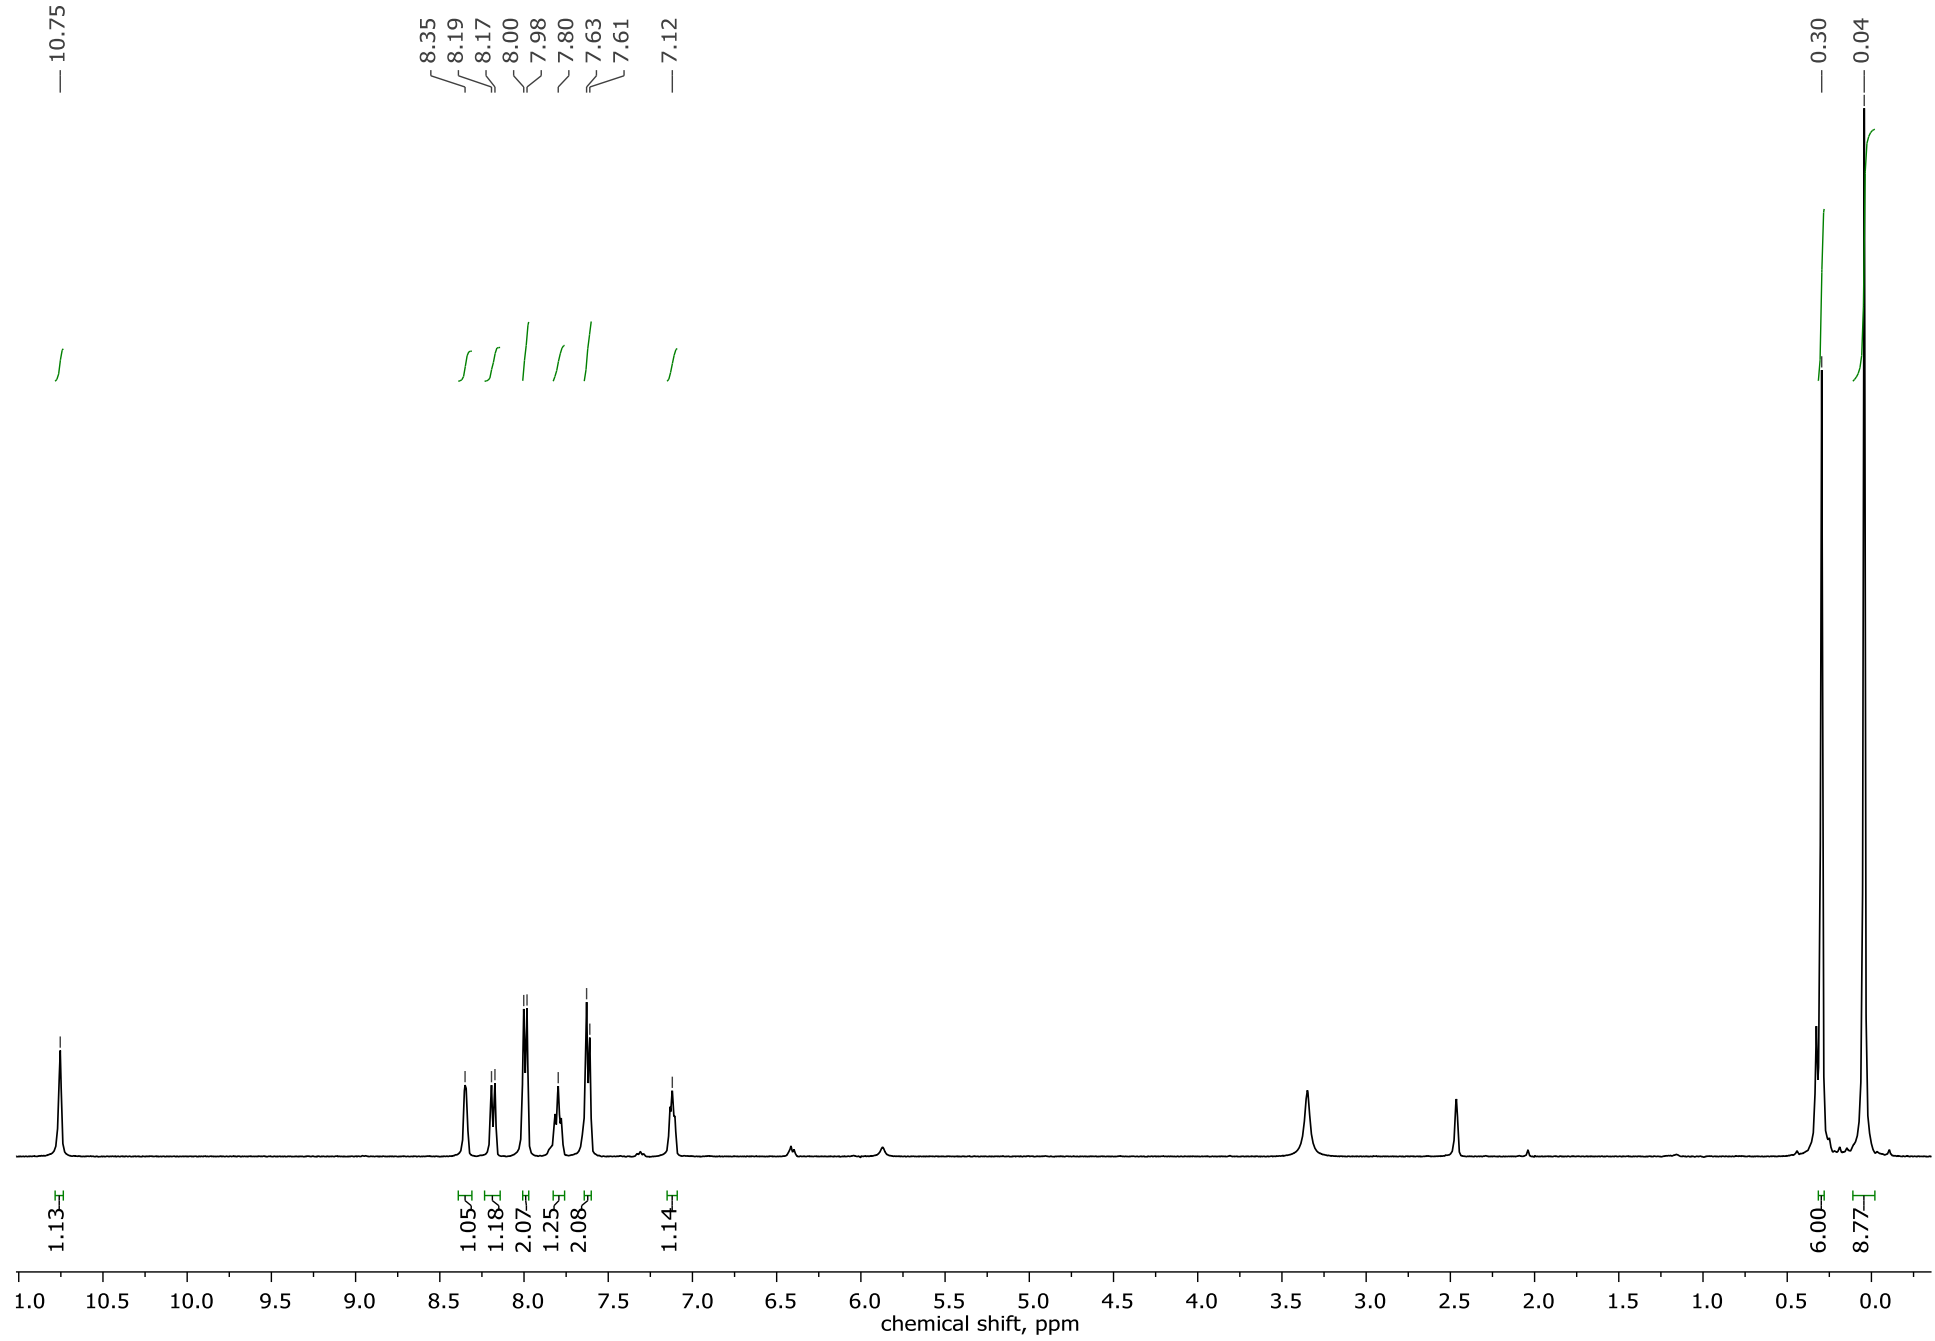



<sup>13</sup>C NMR

(100 MHz, DMSO-d6)

S145

— 166.02

— 152.20

— 147.93

— 143.88

— 138.10

— 134.90

— 132.74

— 127.16

— 119.82

— 114.71

— 2.00

— 0.74

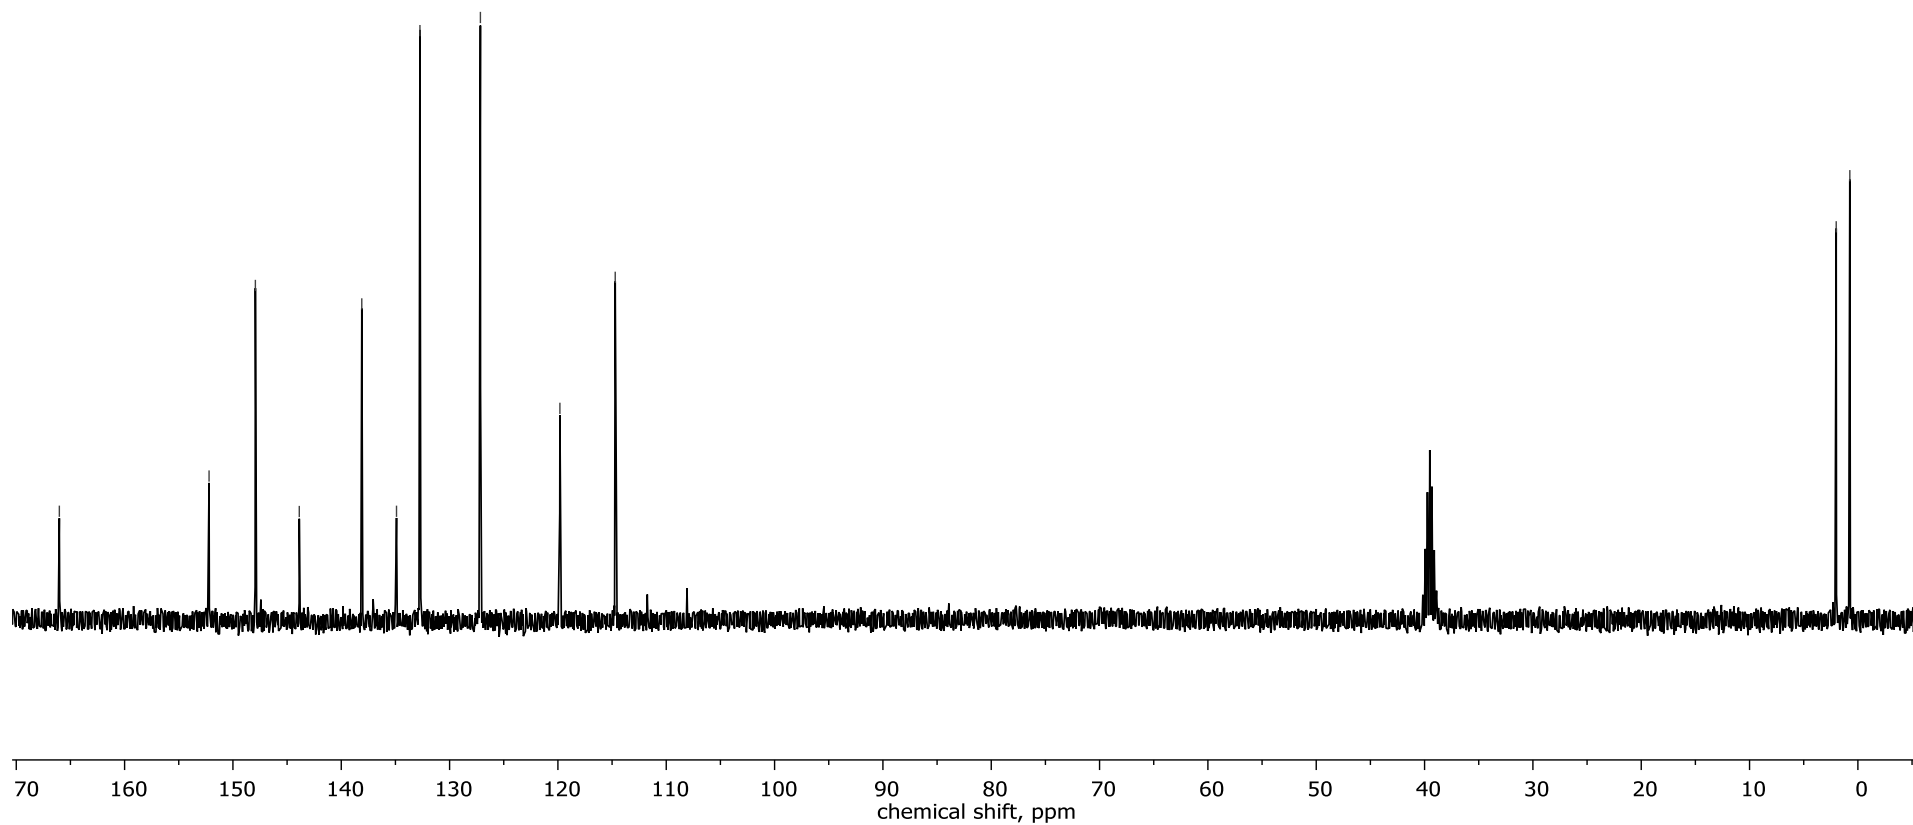

$^{29}\text{Si}$  NMR

(80 MHz, DMSO-d<sub>6</sub>)

S146

— 9.31  
— -2.06

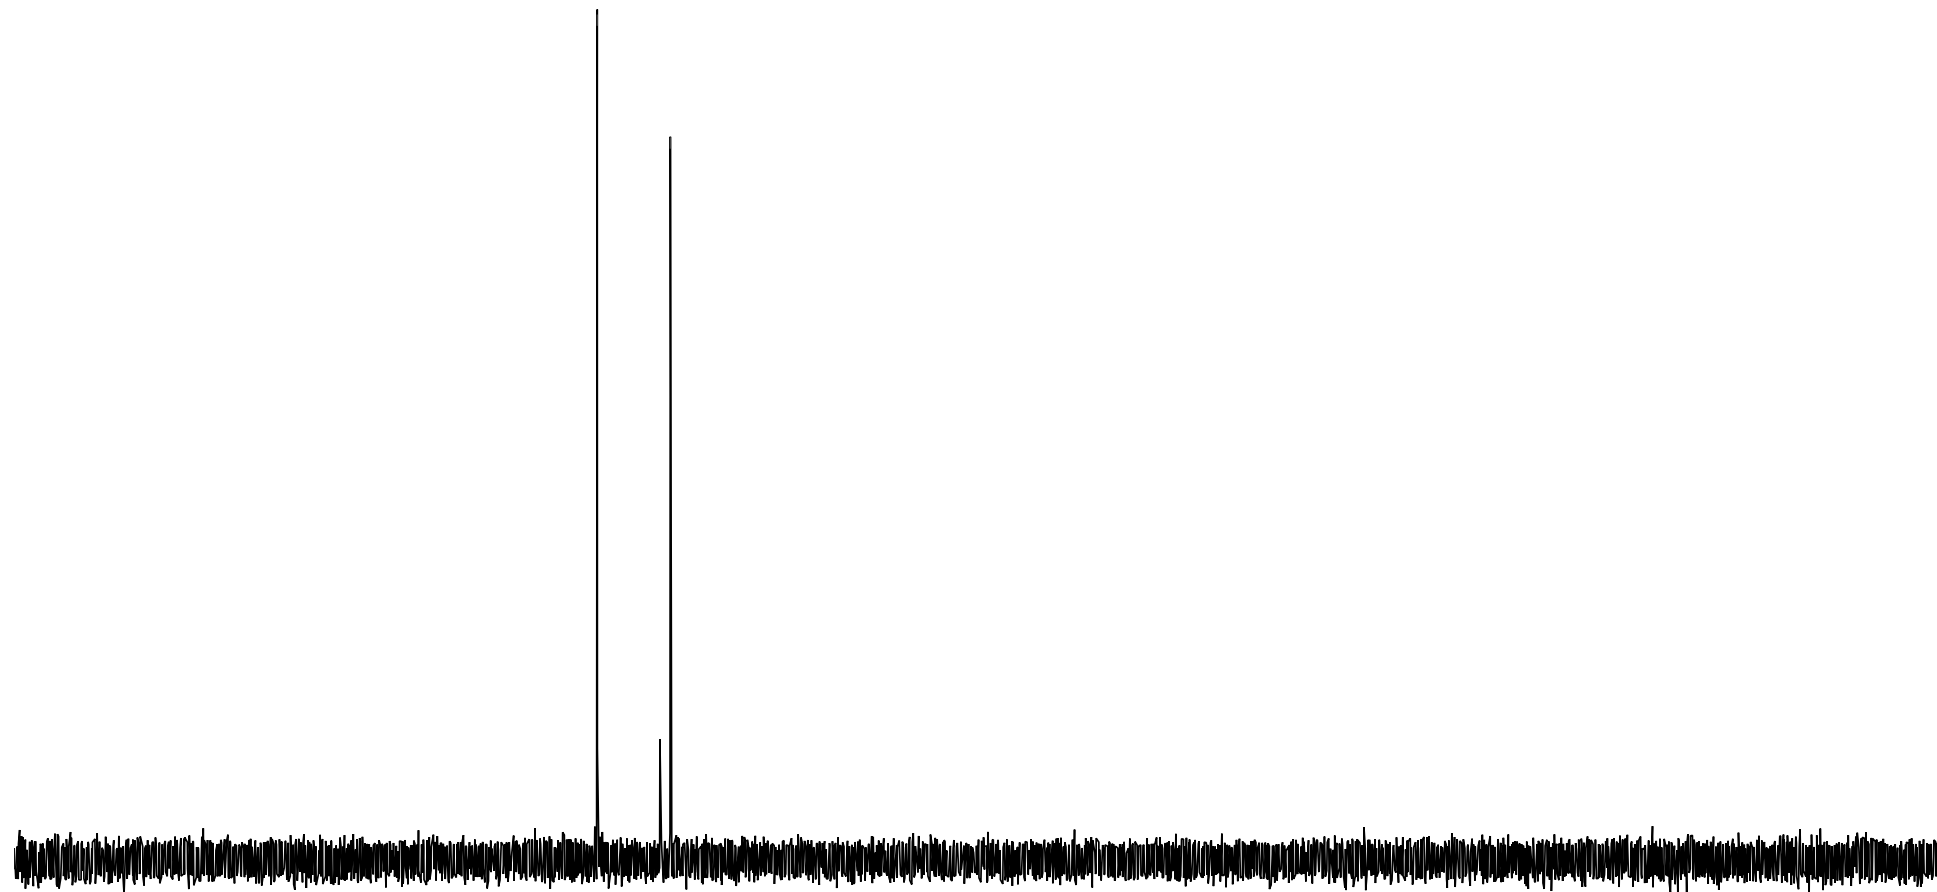

00 90 80 70 60 50 40 30 20 10 0 -10 -20 -30 -40 -50 -60 -70 -80 -90 -100 -110 -120 -130 -140 -150 -160 -170 -180 -190 -2

IR spectrum

S147

— 2958

— 1675  
— 1584  
— 1539  
— 1442

— 1313  
— 1253

— 1077

— 840

— 682

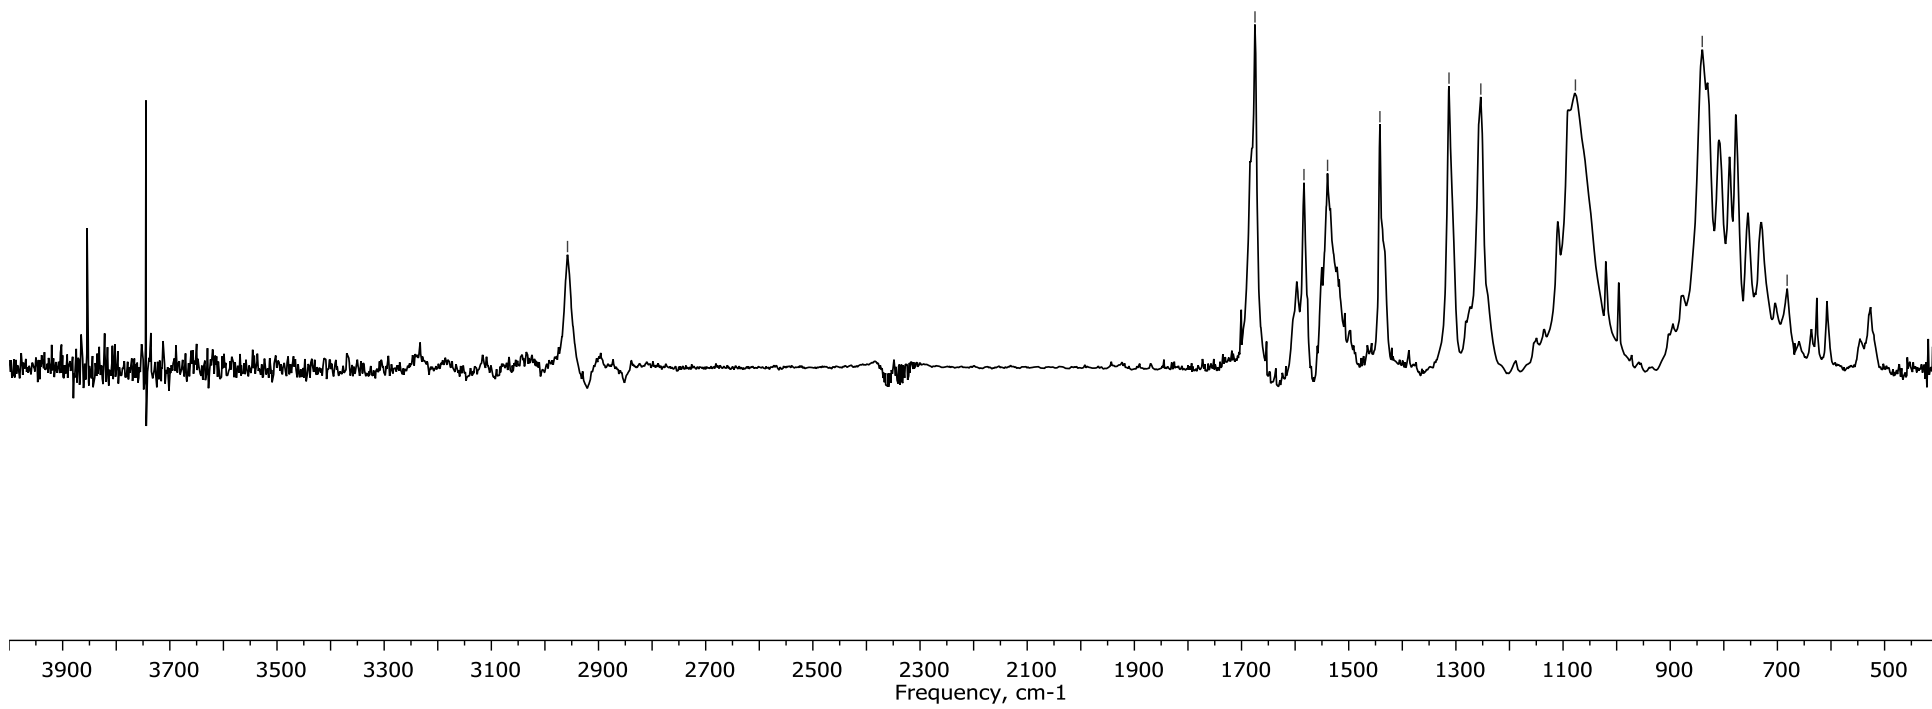

S148

HRMS (ESI)

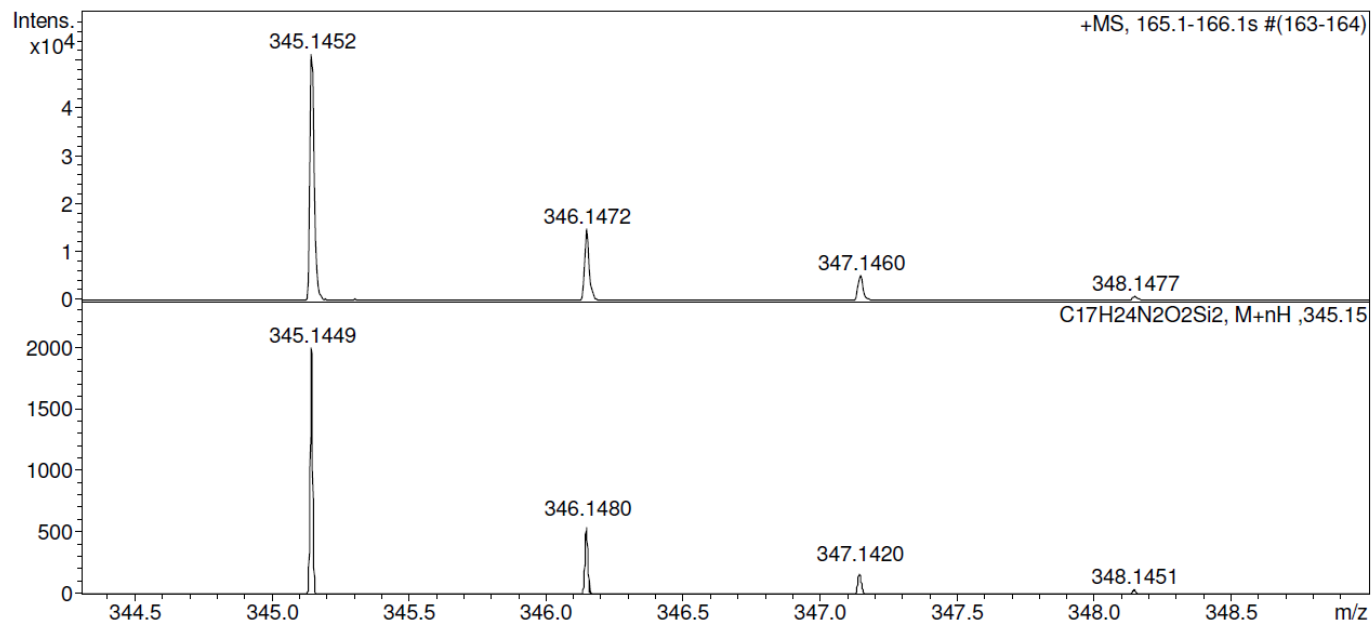

S149

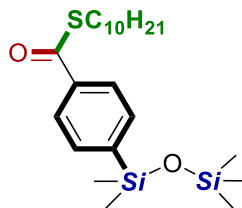

**Characterisation data for S-decyl 4-(1,1,3,3,3-pentamethyldisiloxanyl)benzothioate:**

$^1\text{H}$  NMR (400 MHz,  $\text{CDCl}_3$ ):  $\delta = 7.95$  (d,  $^3J=11$  Hz, 2H),  $\delta = 7.63$  (d,  $^3J=11$  Hz, 2H),  $\delta = 3.08$  (t,  $^3J=10$  Hz, 2H),  $\delta = 1.73$ -1.63 (m, 2H),  $\delta = 1.49$ -1.39 (m, 2H),  $\delta = 1.36$ -1.28 (m, 13H),  $\delta = 0.89$  (m, 3H),  $\delta = 0.34$  (s, 6H),  $\delta = 0.10$  (s, 9H).  $^{13}\text{C}$  NMR (100 MHz,  $\text{CDCl}_3$ ):  $\delta = 192.22$ , 146.64, 137.69, 133.09, 126.11, 31.88, 29.57, 29.53, 29.49, 29.29, 29.15, 28.99, 28.93, 22.66, 14.08, 1.90, 0.74.  $^{29}\text{Si}$  NMR (80 MHz,  $\text{CDCl}_3$ ):  $\delta = 9.45$ , -2.72. HRMS (ESI)  $m/z$   $[\text{M} + \text{H}]^+$ : calcd for  $[\text{C}_{22}\text{H}_{40}\text{O}_2\text{SSi}_2 + \text{H}]^+$ , 425.2360; found, 425.2368;  $[\text{M} + \text{NH}_4]^+$ : calcd for  $[\text{C}_{22}\text{H}_{40}\text{O}_2\text{SSi}_2 + \text{NH}_4]^+$ , 442.2626; found, 442.2624;  $[\text{M} + \text{Na}]^+$ : calcd for  $[\text{C}_{22}\text{H}_{40}\text{O}_2\text{SSi}_2 + \text{Na}]^+$ , 447.2180; found, 447.2161;  $[\text{M} + \text{K}]^+$ : calcd for  $[\text{C}_{22}\text{H}_{40}\text{O}_2\text{SSi}_2 + \text{K}]^+$ , 463.1919; found, 463.1914. IR ( $\text{cm}^{-1}$ ): 2956-2855, 1669, 1457, 1387, 1254, 1212, 1181, 1058, 916, 842-650.

<sup>1</sup>H NMR

(400 MHz, CDCl<sub>3</sub>)

S150

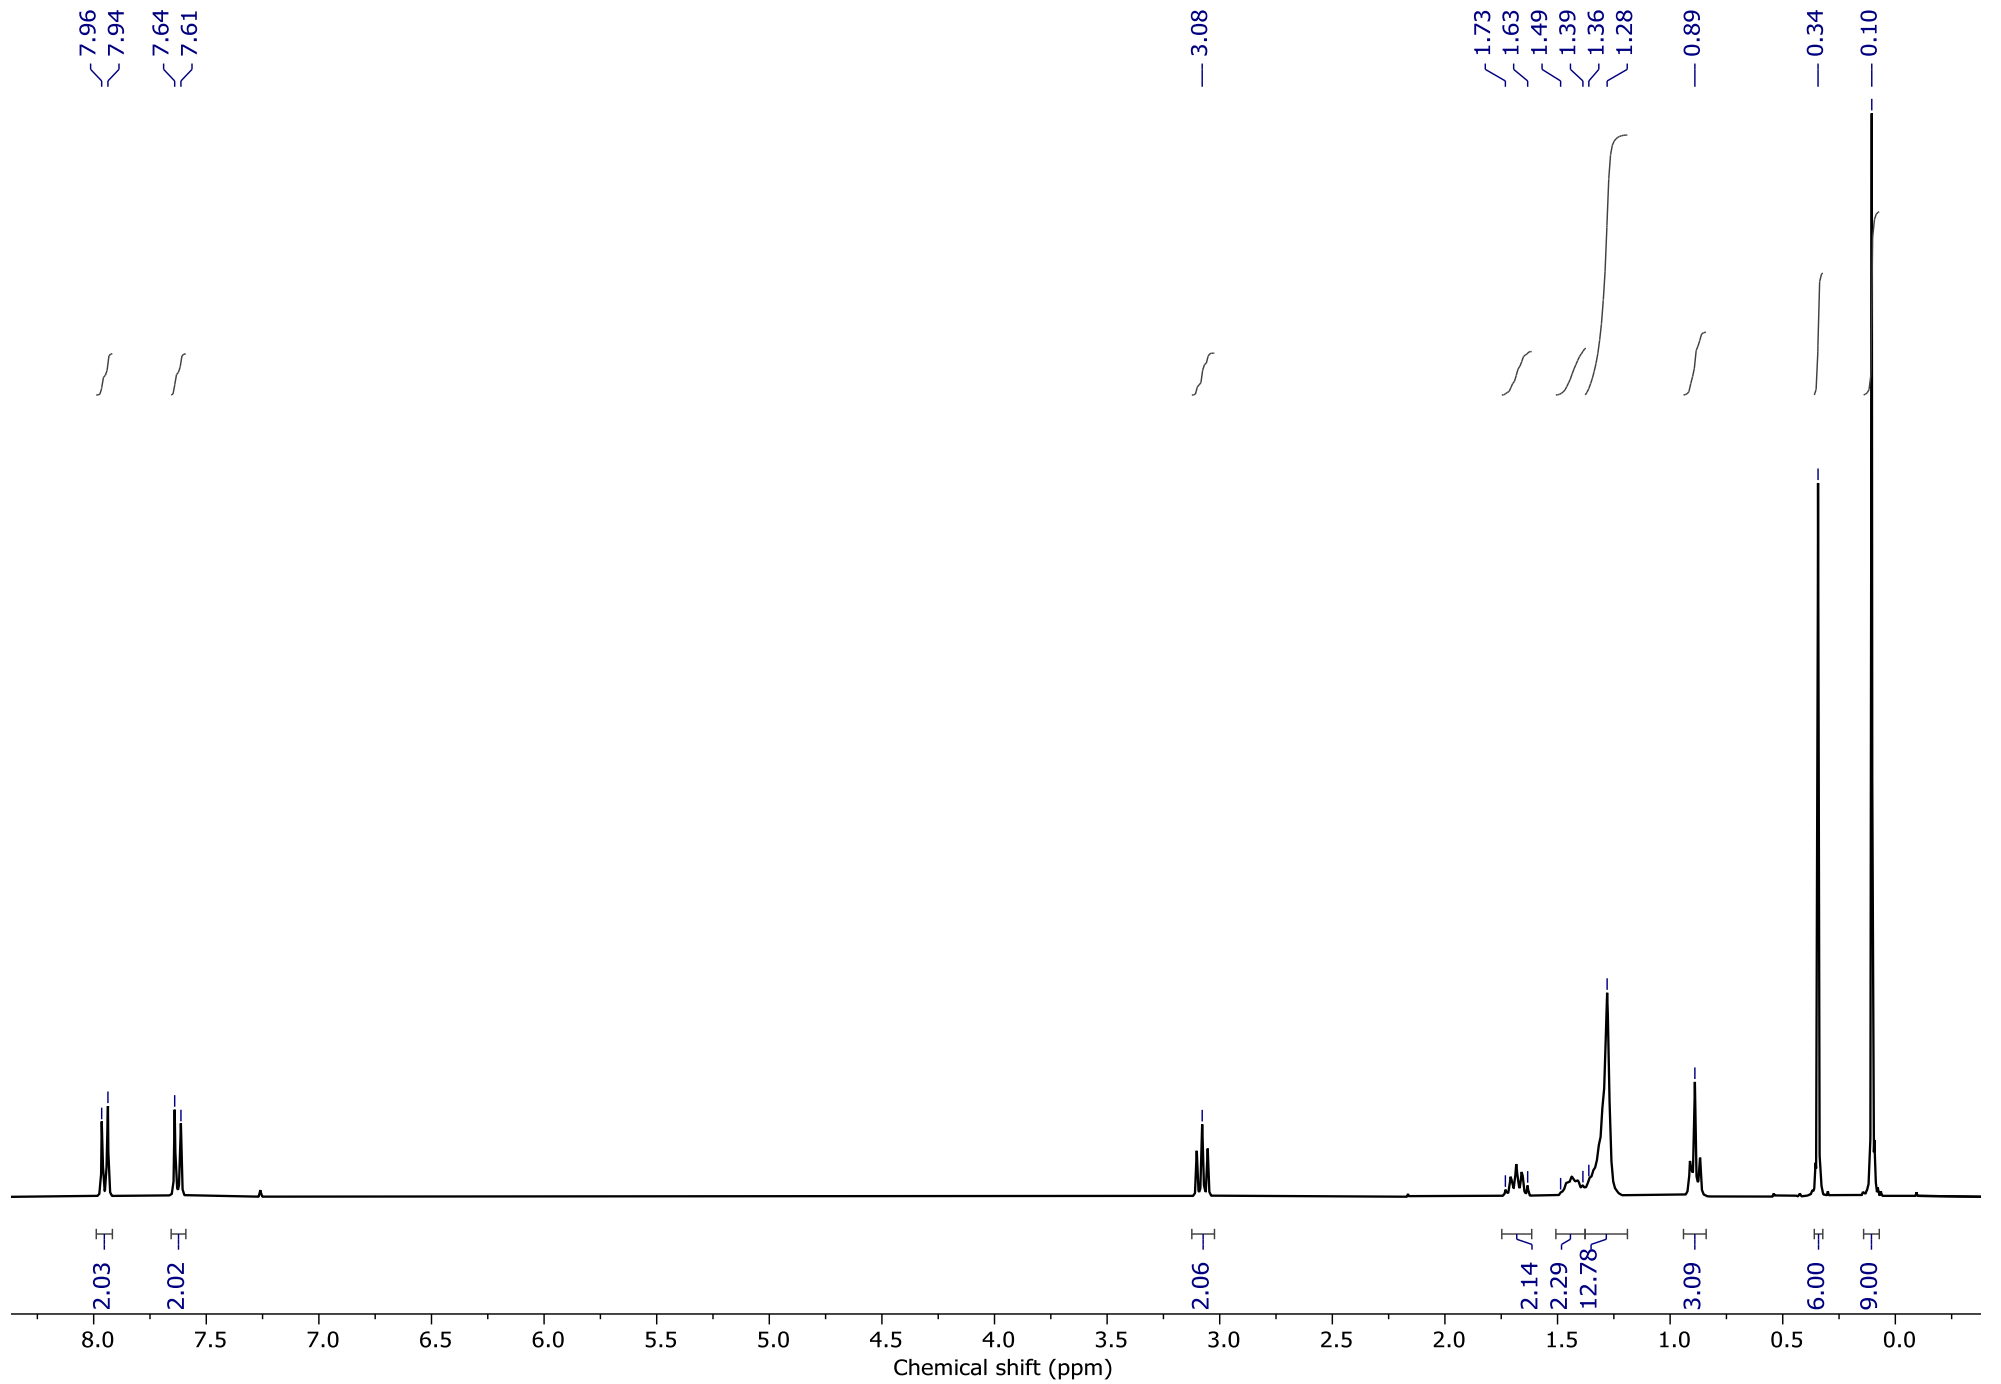

<sup>13</sup>C NMR

(100 MHz, CDCl<sub>3</sub>)

S151

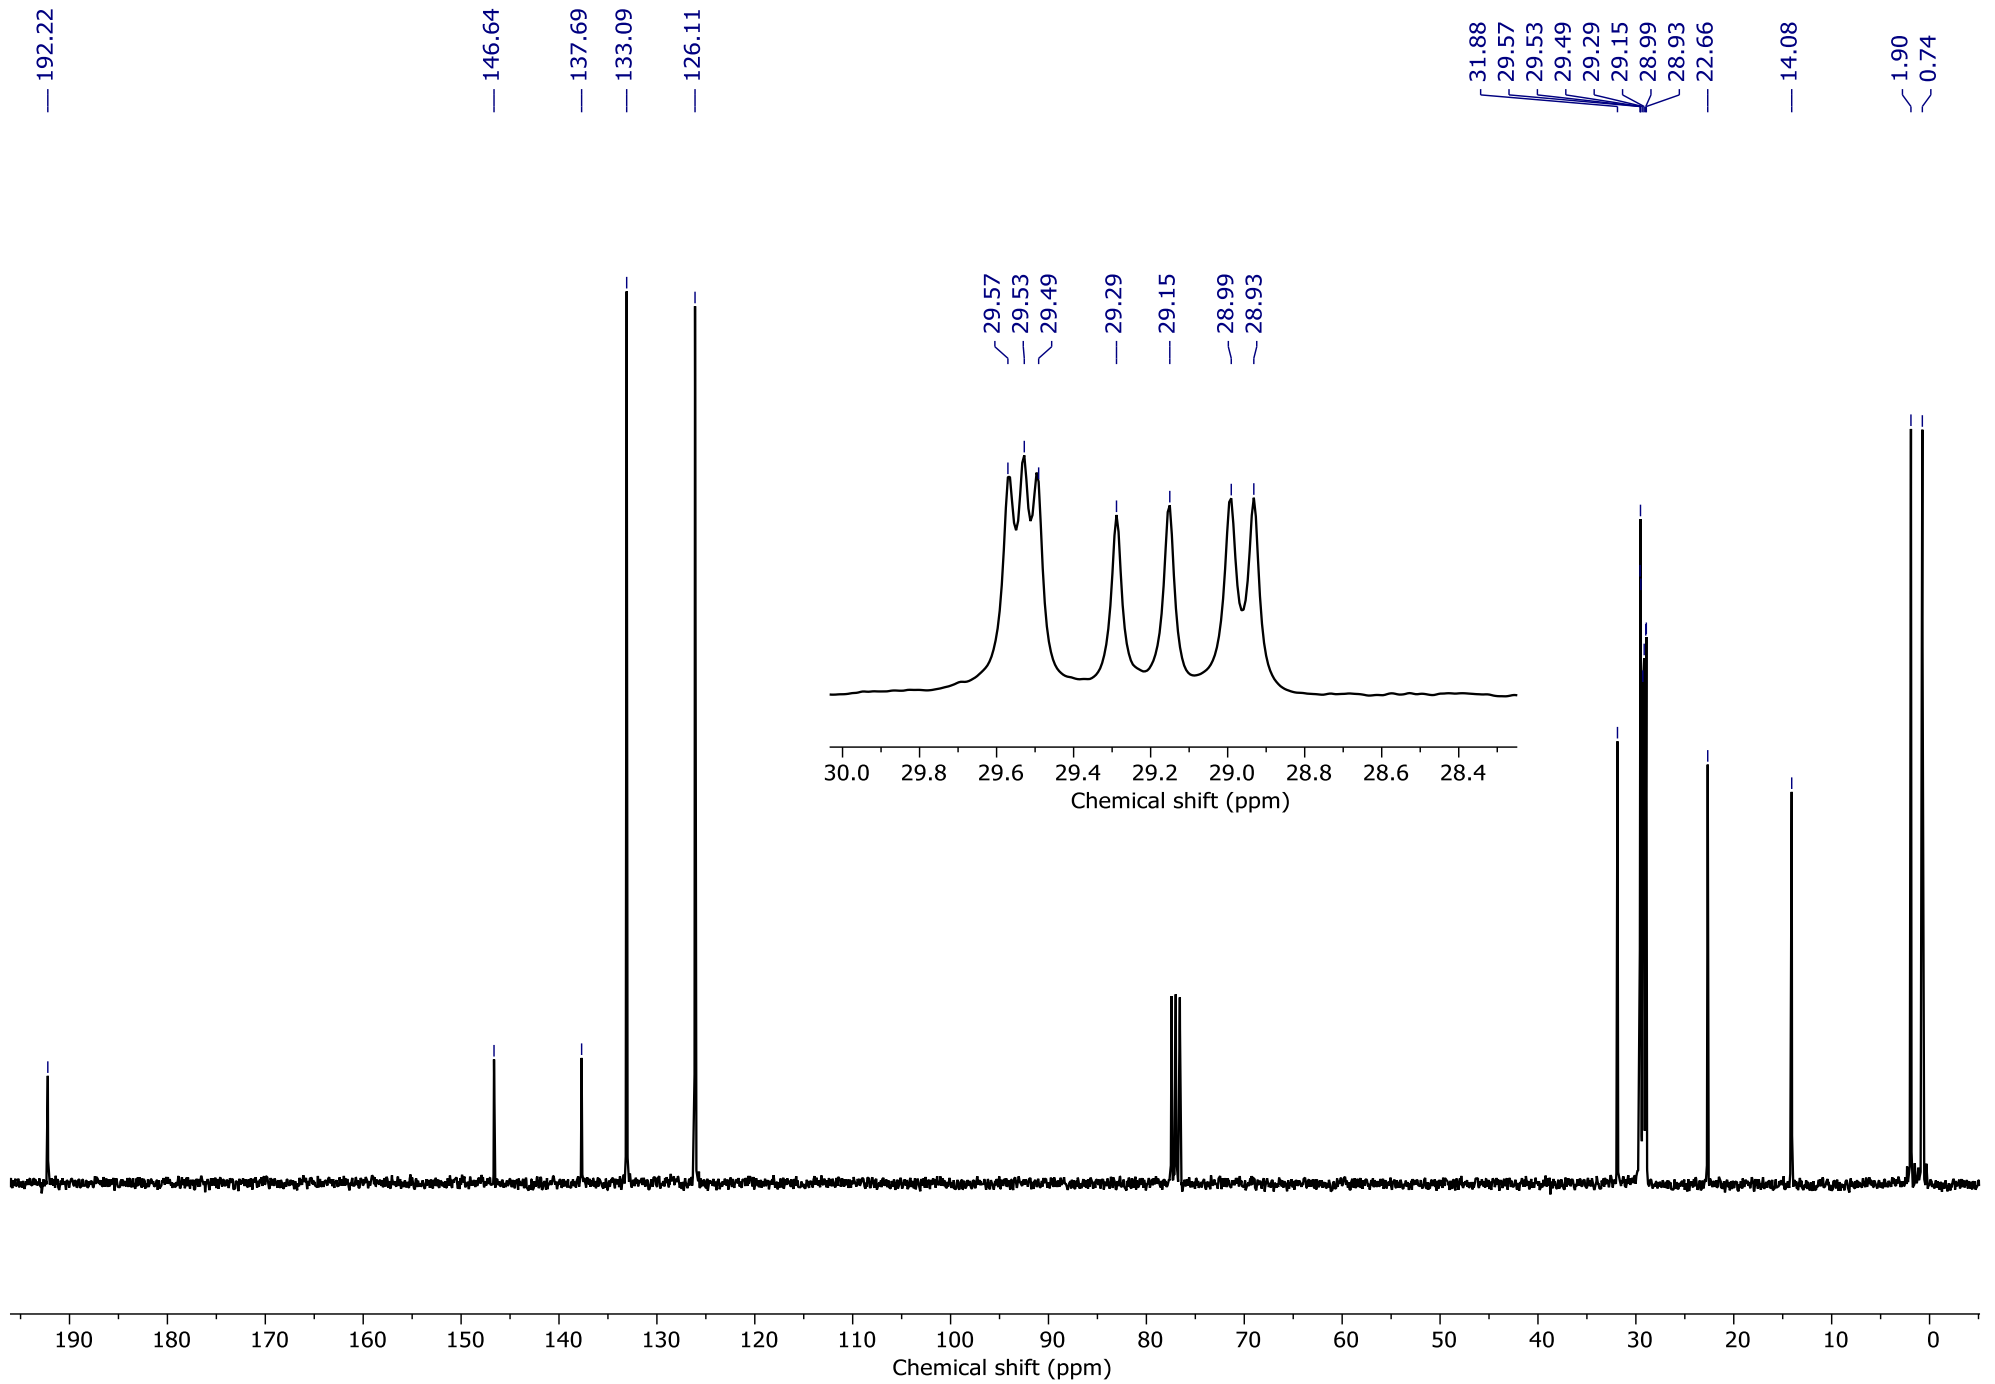

$^{29}\text{Si}$  NMR  
(80 MHz,  $\text{CDCl}_3$ )

S152

9.45

-2.72

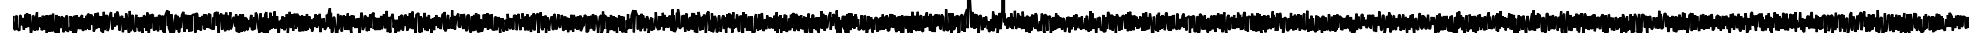

300

250

200

150

100

50

0

-50

-100

-150

-200

-250

-300

Chemical shift (ppm)



$^1\text{H} - ^{13}\text{C}$  HMBC  
(400 MHz,  $\text{CDCl}_3$ )

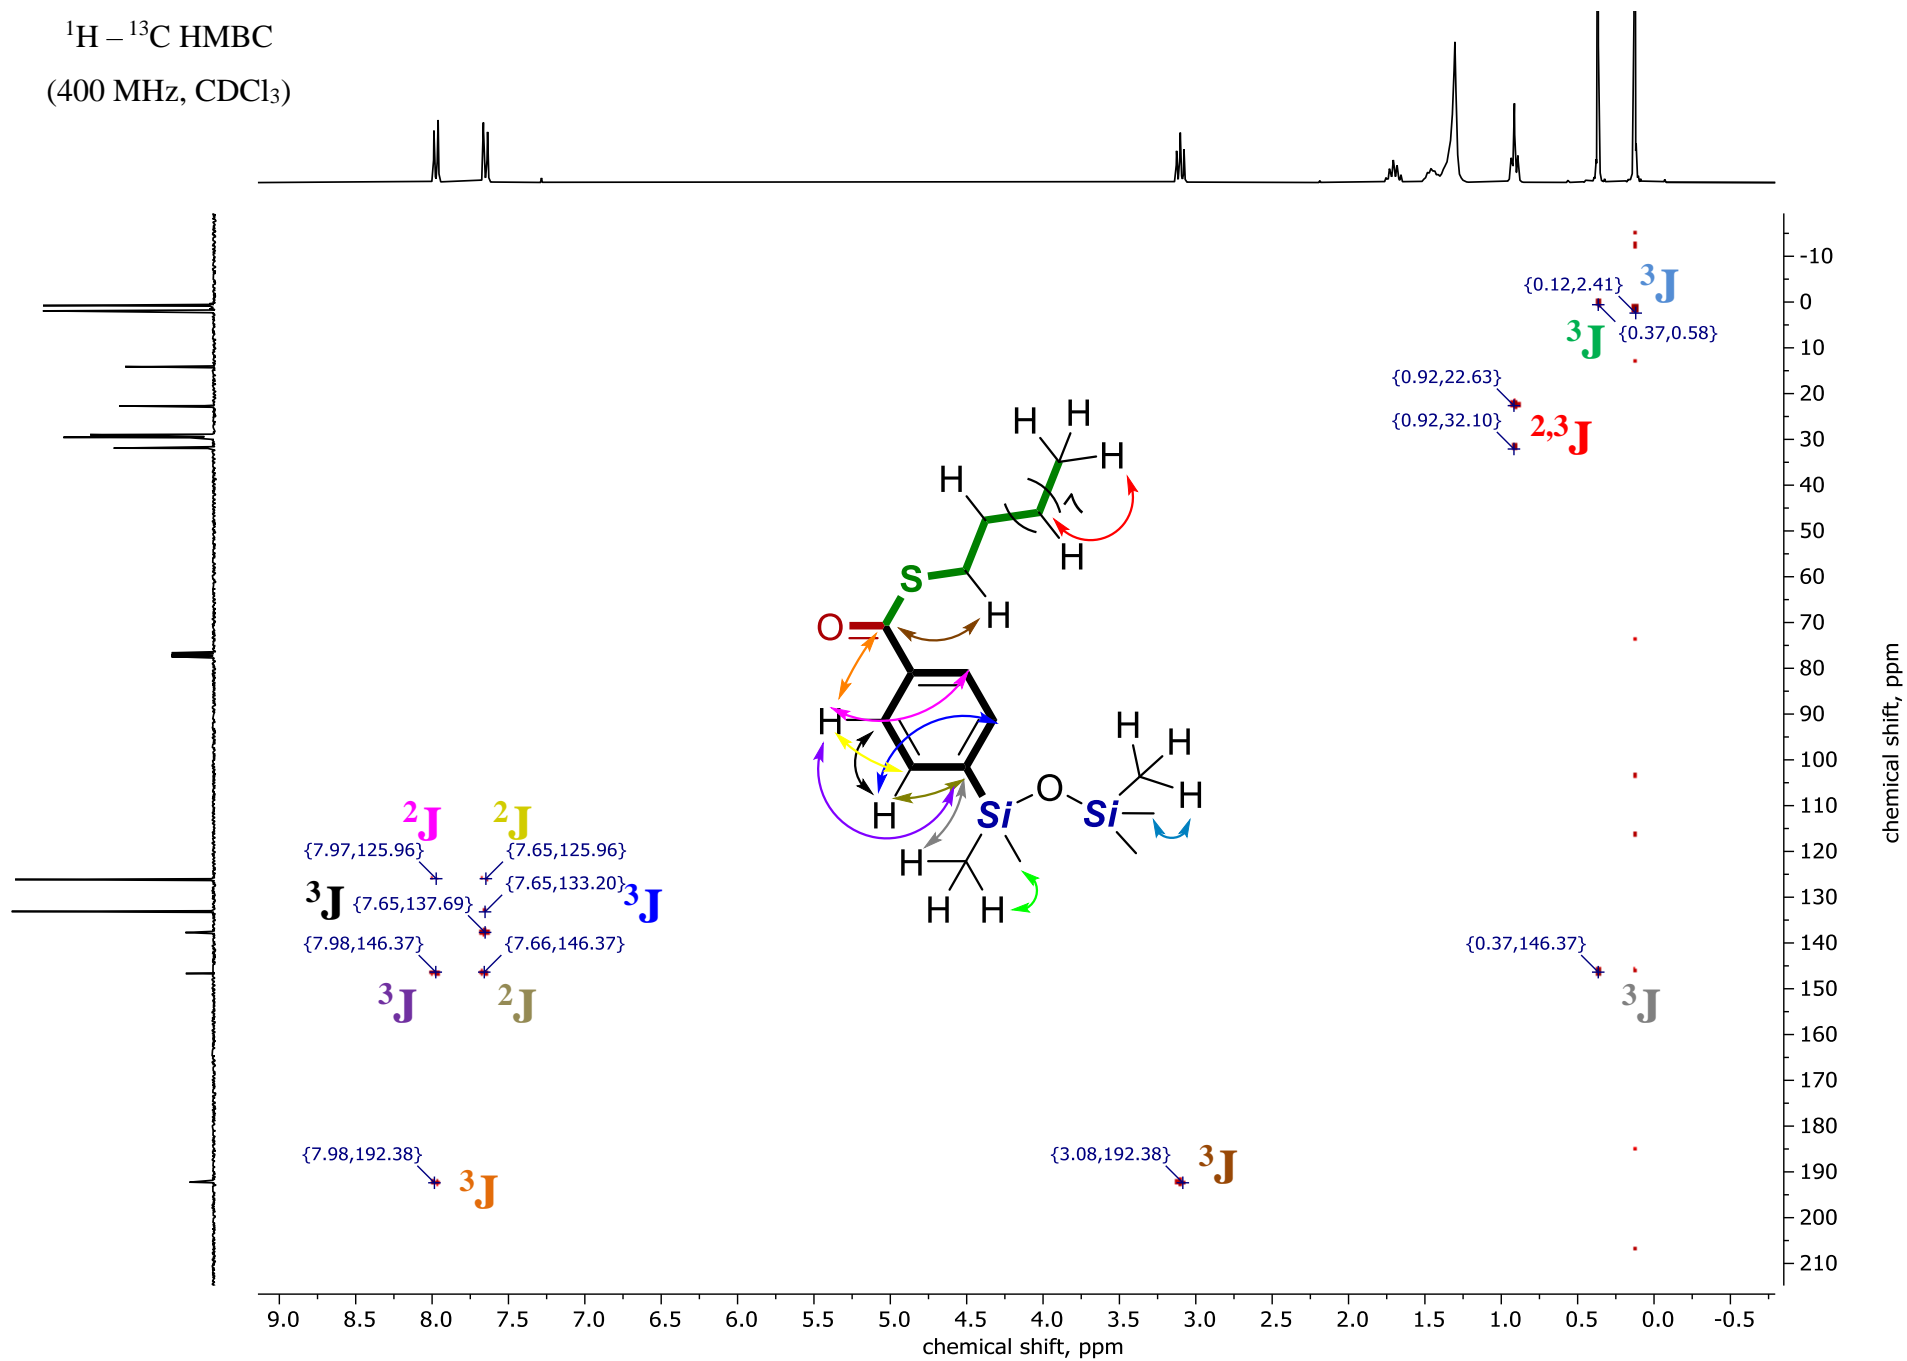

S154

$^1\text{H} - ^{13}\text{C}$  HSQC  
(400 MHz,  $\text{CDCl}_3$ )

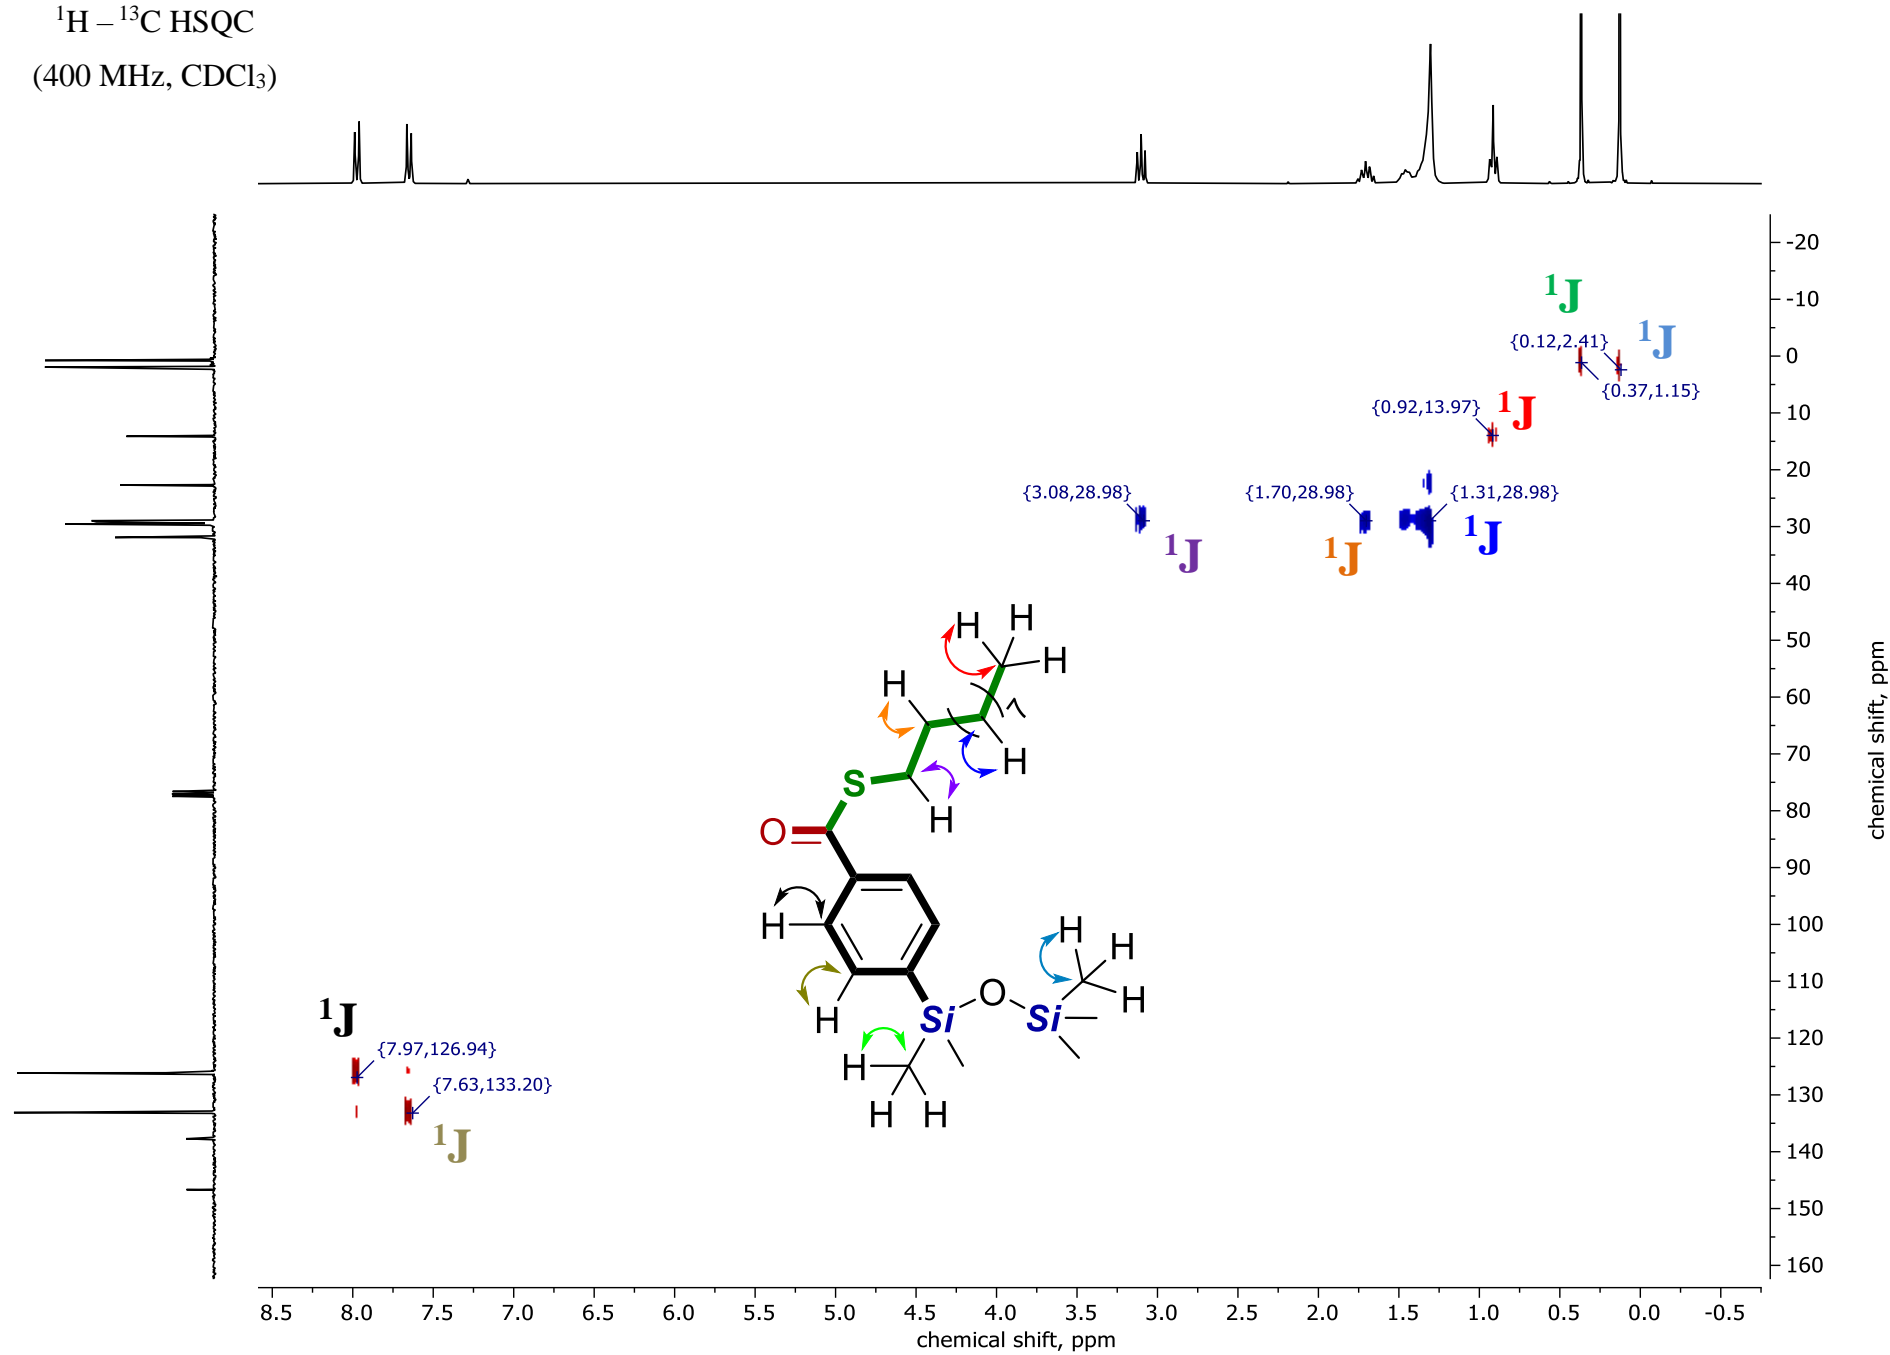

$^1\text{H} - ^{29}\text{Si}$  HMBC  
(400 MHz,  $\text{CDCl}_3$ )

S155

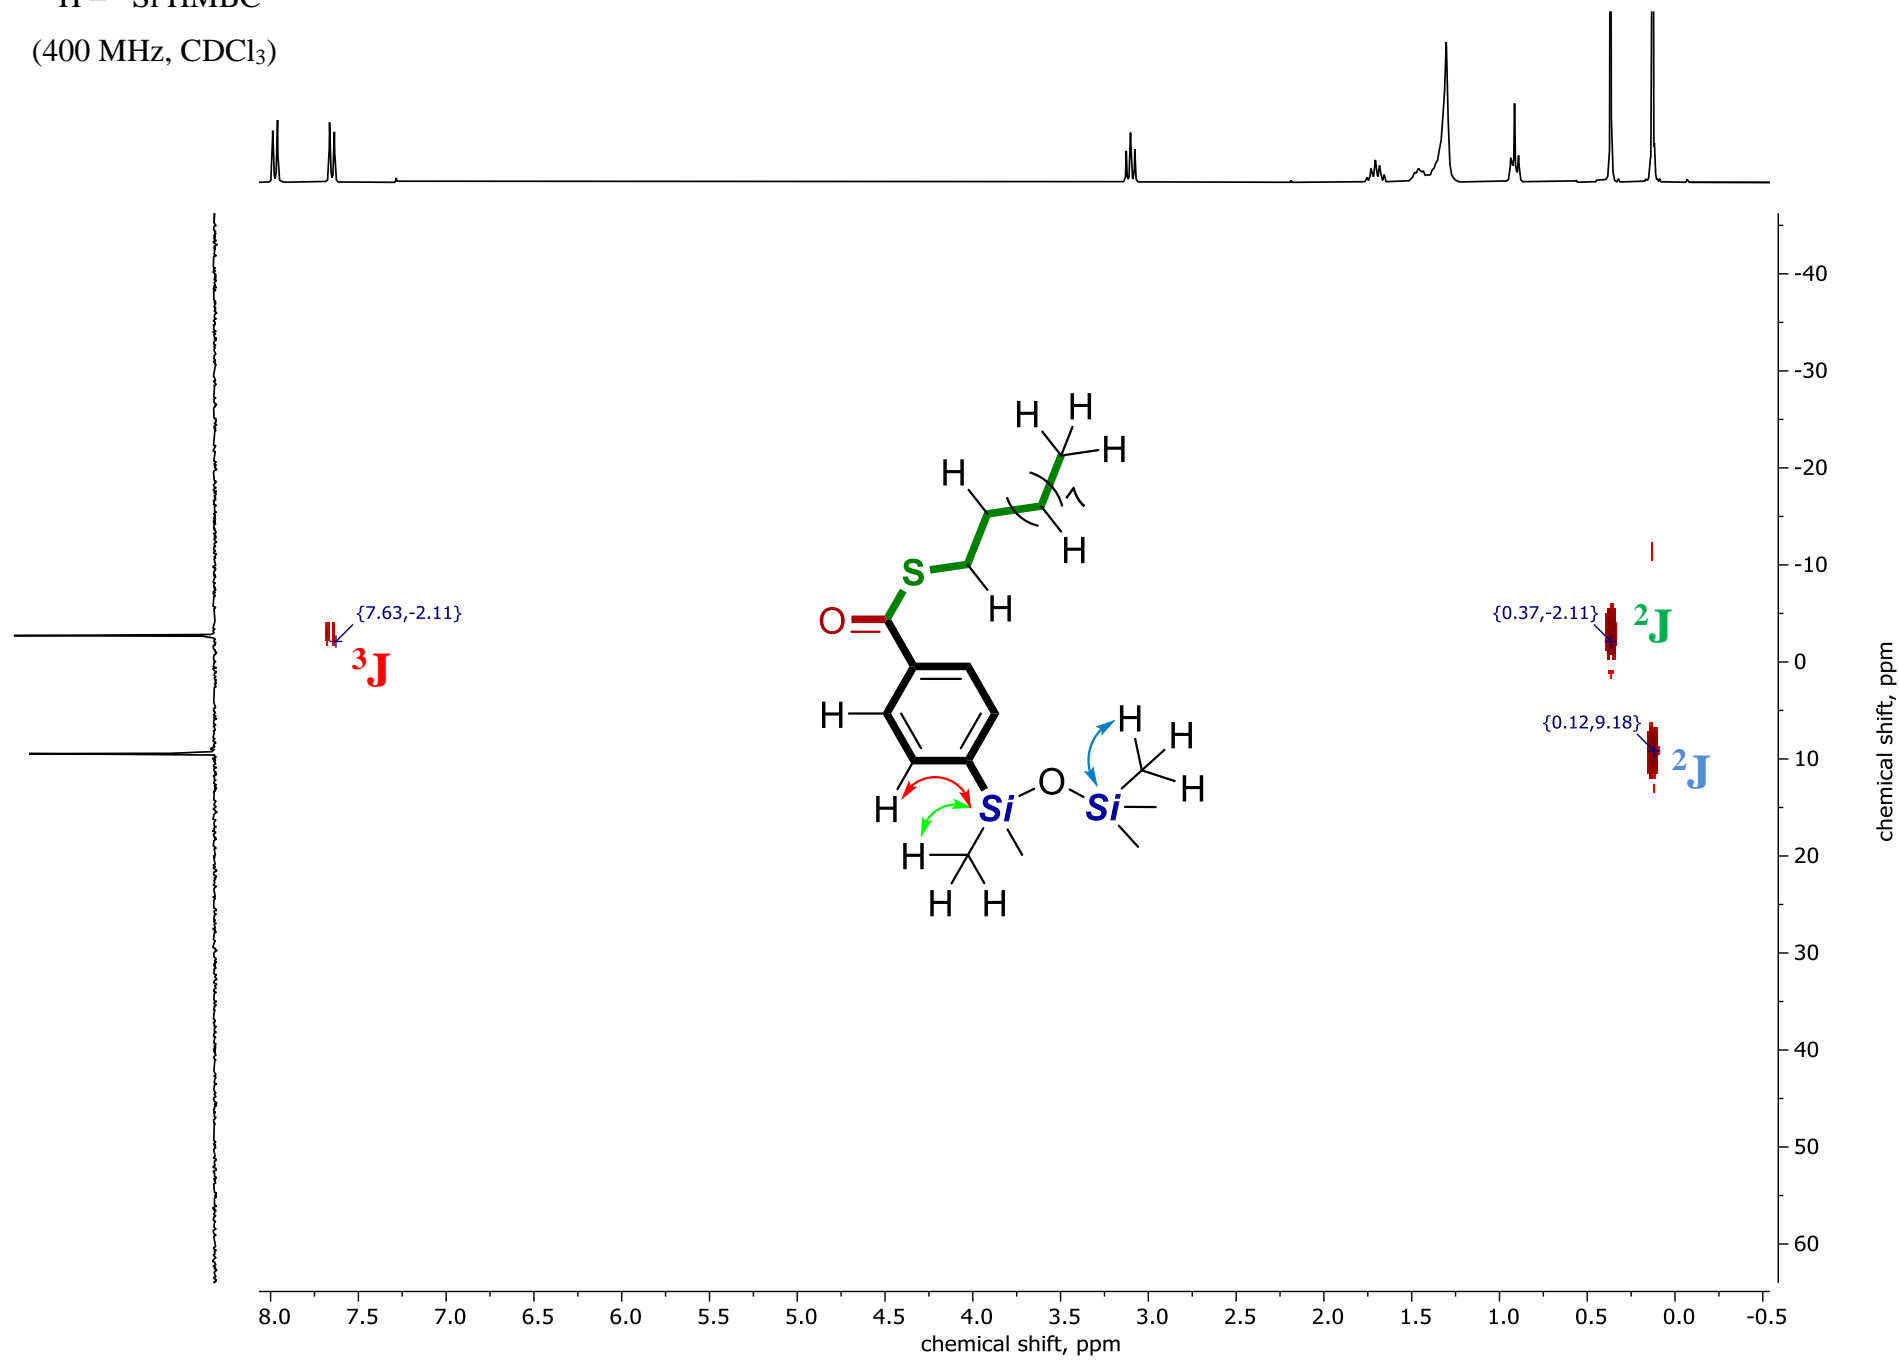

HRMS (ESI)

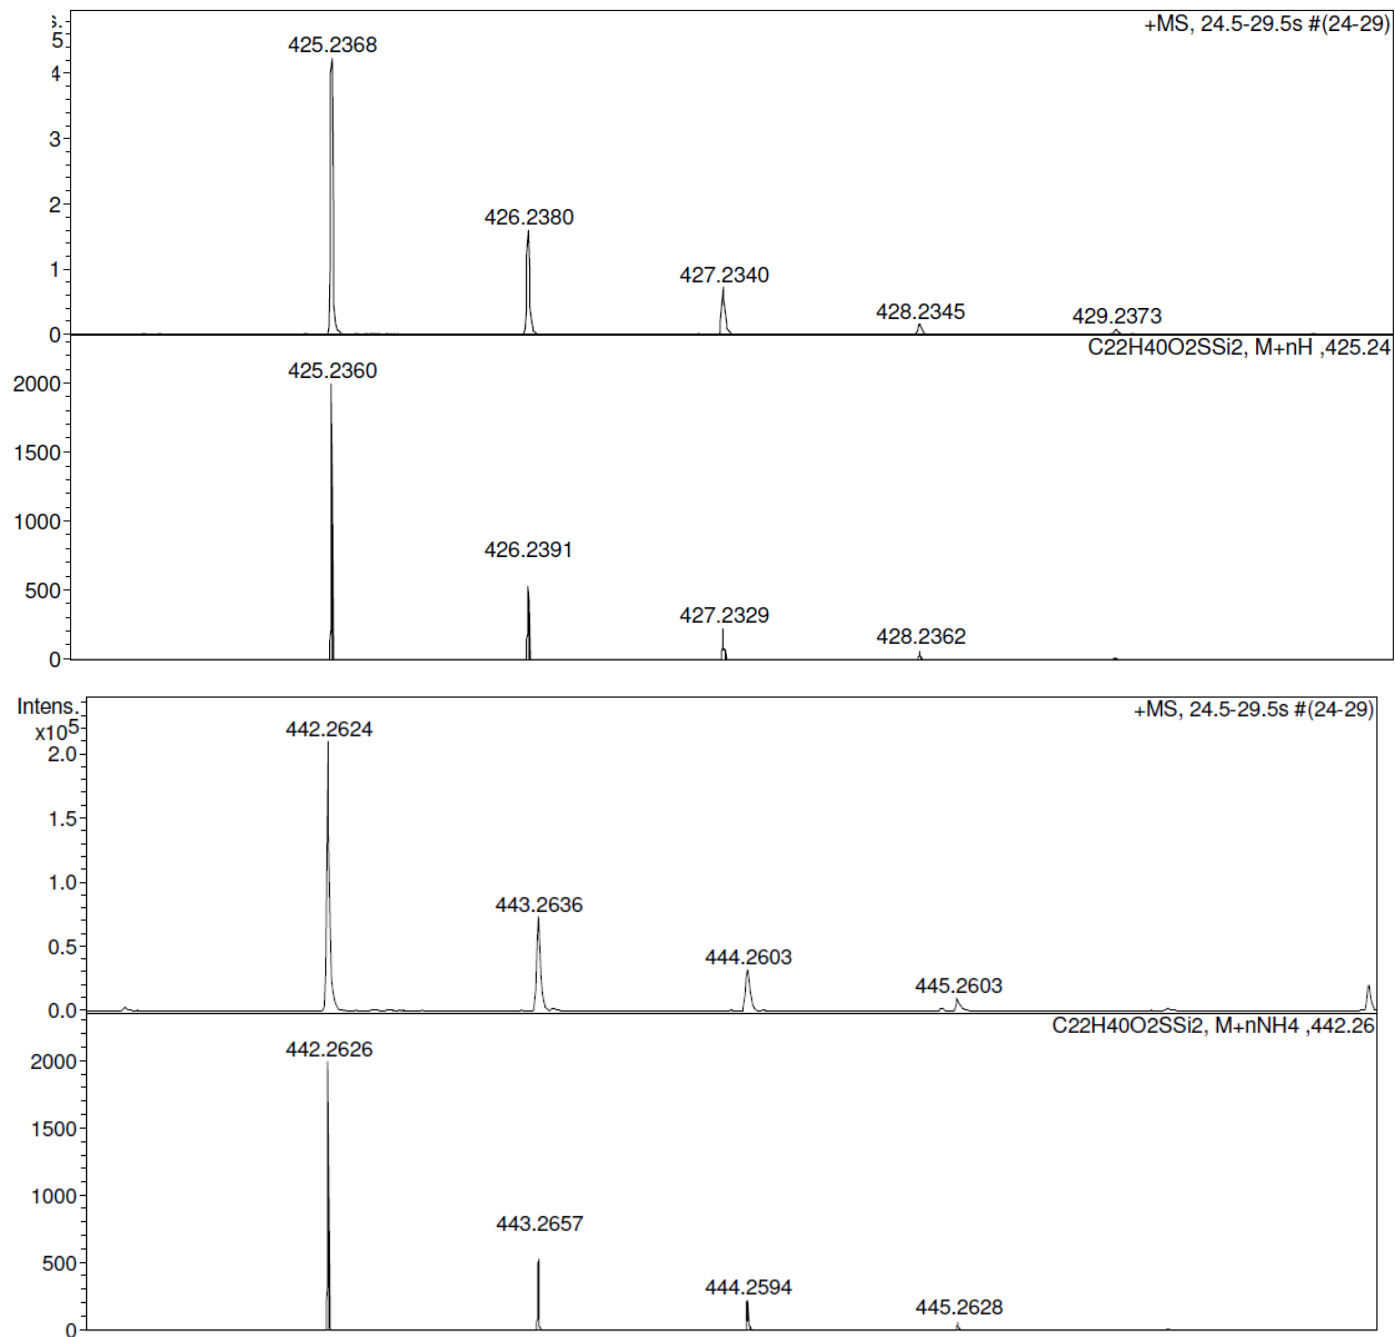

S157

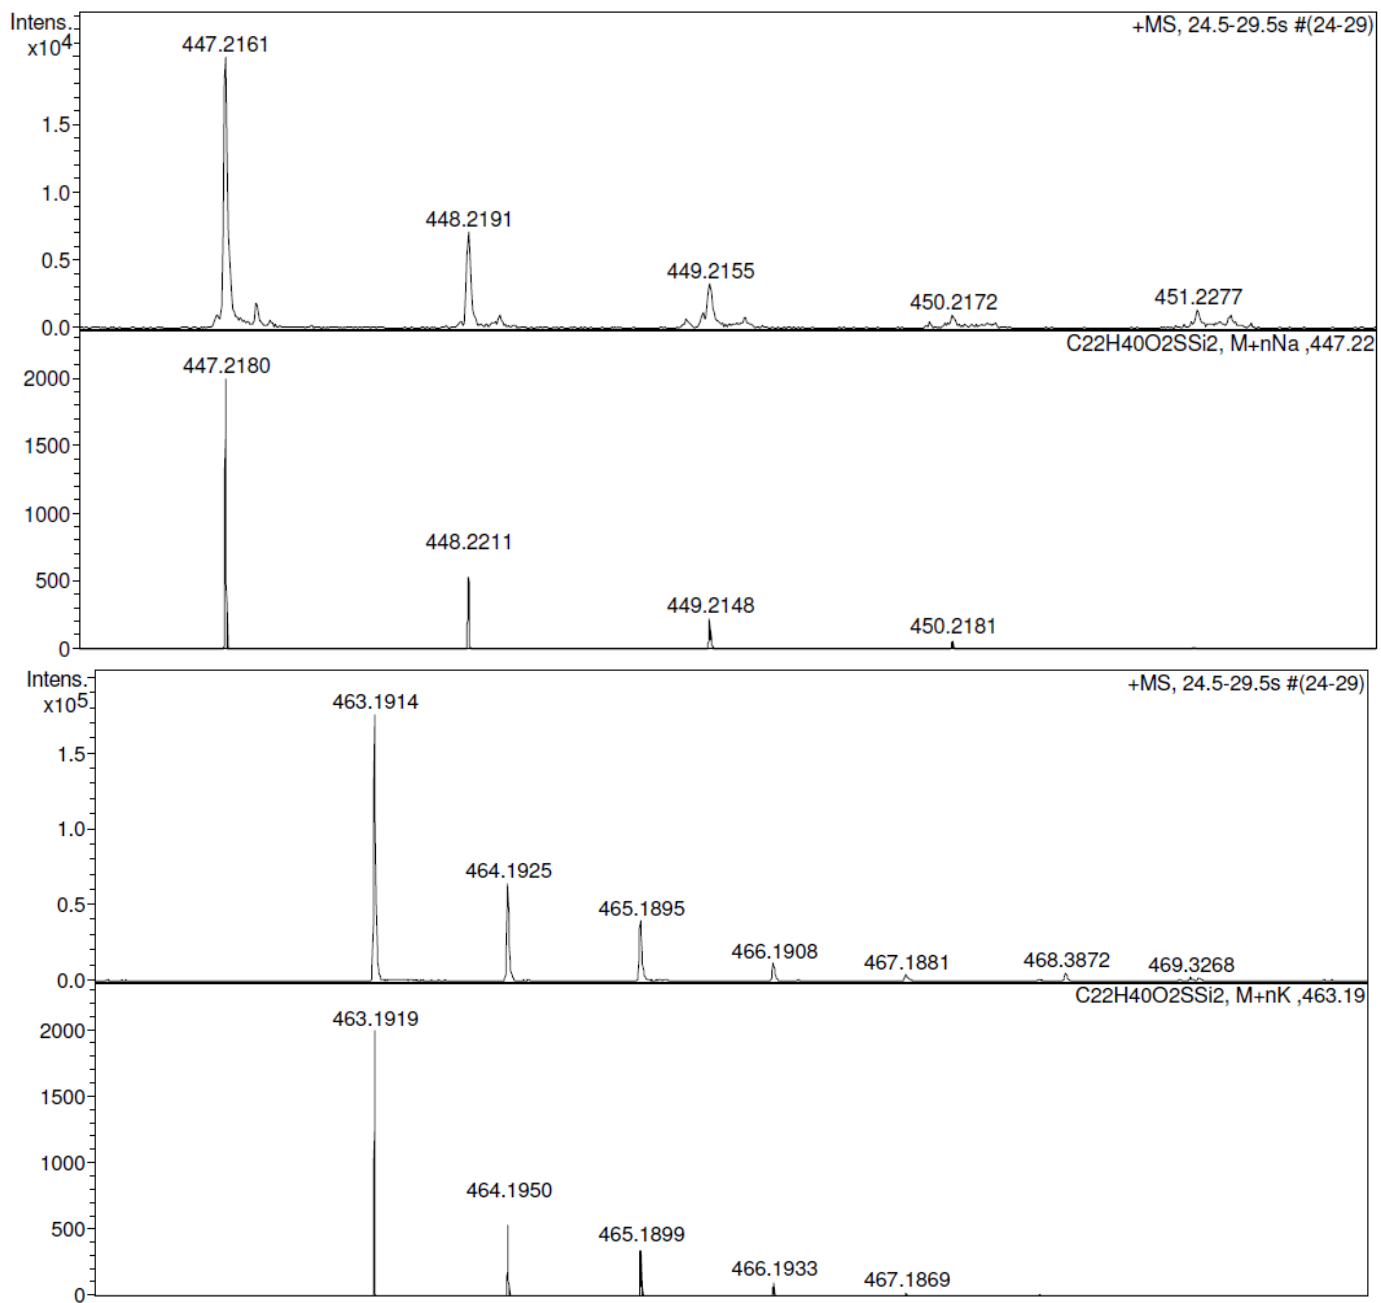

S158

IR spectrum

— 2956

— 2855

— 1669

— 1457

— 1387

— 1254

— 1212

— 1181

— 1058

— 916

— 842

— 650

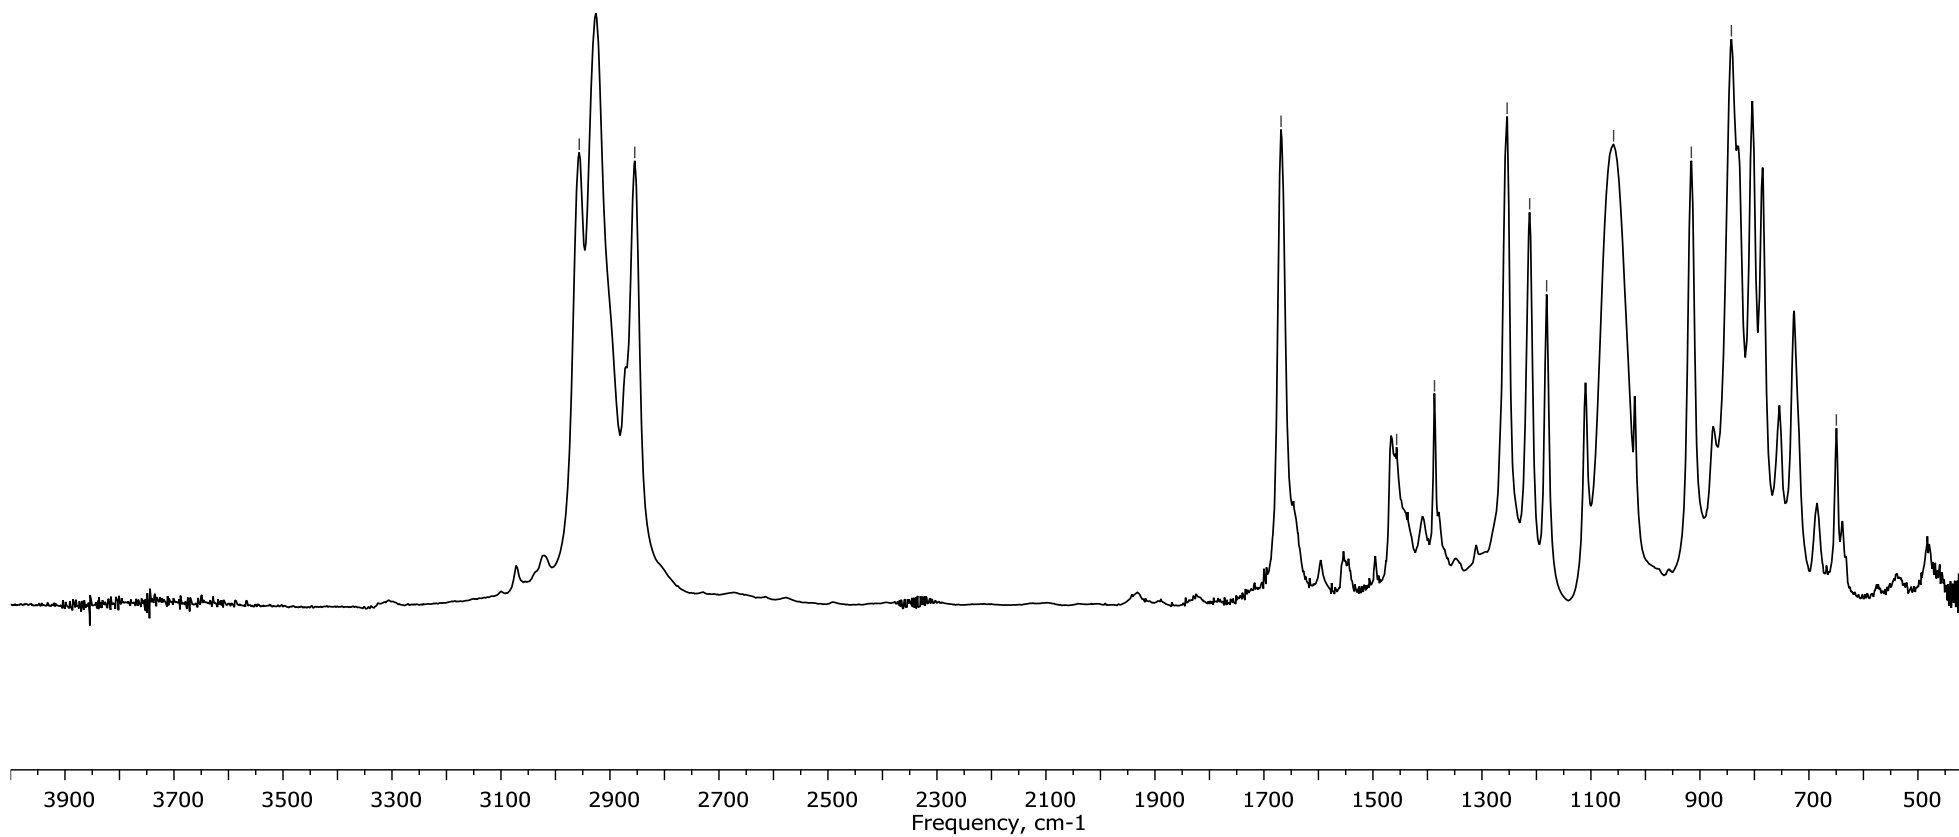

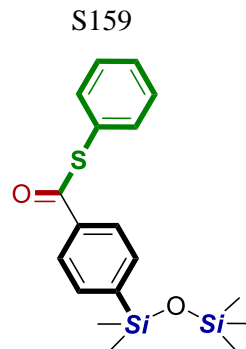

**Characterisation data for S-phenyl 4-(1,1,3,3,3-pentamethyldisiloxanyl)benzothioate:**

$^1\text{H}$  NMR (400 MHz,  $\text{CDCl}_3$ ):  $\delta = 8.08$  (d,  $^3J=11$  Hz, 2H),  $\delta = 7.74$  (d,  $^3J=11$  Hz, 2H),  $\delta = 7.61$ -7.51 (m, 6H),  $\delta = 0.43$  (s, 6H),  $\delta = 0.19$  (s, 9H).  $^{13}\text{C}$  NMR (100 MHz,  $\text{CDCl}_3$ ):  $\delta = 190.20$ , 147.29, 137.02, 135.04, 133.26, 126.38, 1.93, 0.75.  $^{29}\text{Si}$  NMR (80 MHz,  $\text{CDCl}_3$ ):  $\delta = 9.63$ , -2.67. HRMS (ESI)  $m/z$   $[\text{M} + \text{H}]^+$ : calcd for  $[\text{C}_{18}\text{H}_{24}\text{O}_2\text{SSi}_2 + \text{H}]^+$ , 361.1108; found, 361.1127;  $[\text{M} + \text{NH}_4]^+$ : calcd for  $[\text{C}_{18}\text{H}_{24}\text{O}_2\text{SSi}_2 + \text{NH}_4]^+$ , 378.1374; found, 378.1376;  $[\text{M} + \text{Na}]^+$ : calcd for  $[\text{C}_{18}\text{H}_{24}\text{O}_2\text{SSi}_2 + \text{Na}]^+$ , 383.0928; found, 383.0924;  $[\text{M} + \text{K}]^+$ : calcd for  $[\text{C}_{18}\text{H}_{24}\text{O}_2\text{SSi}_2 + \text{K}]^+$ , 399.0667; found, 399.0666. IR ( $\text{cm}^{-1}$ ): 3063, 2899, 1685, 1579, 1479, 1441, 1387, 1254, 1209, 1182, 1052, 903, 842-646.

S160

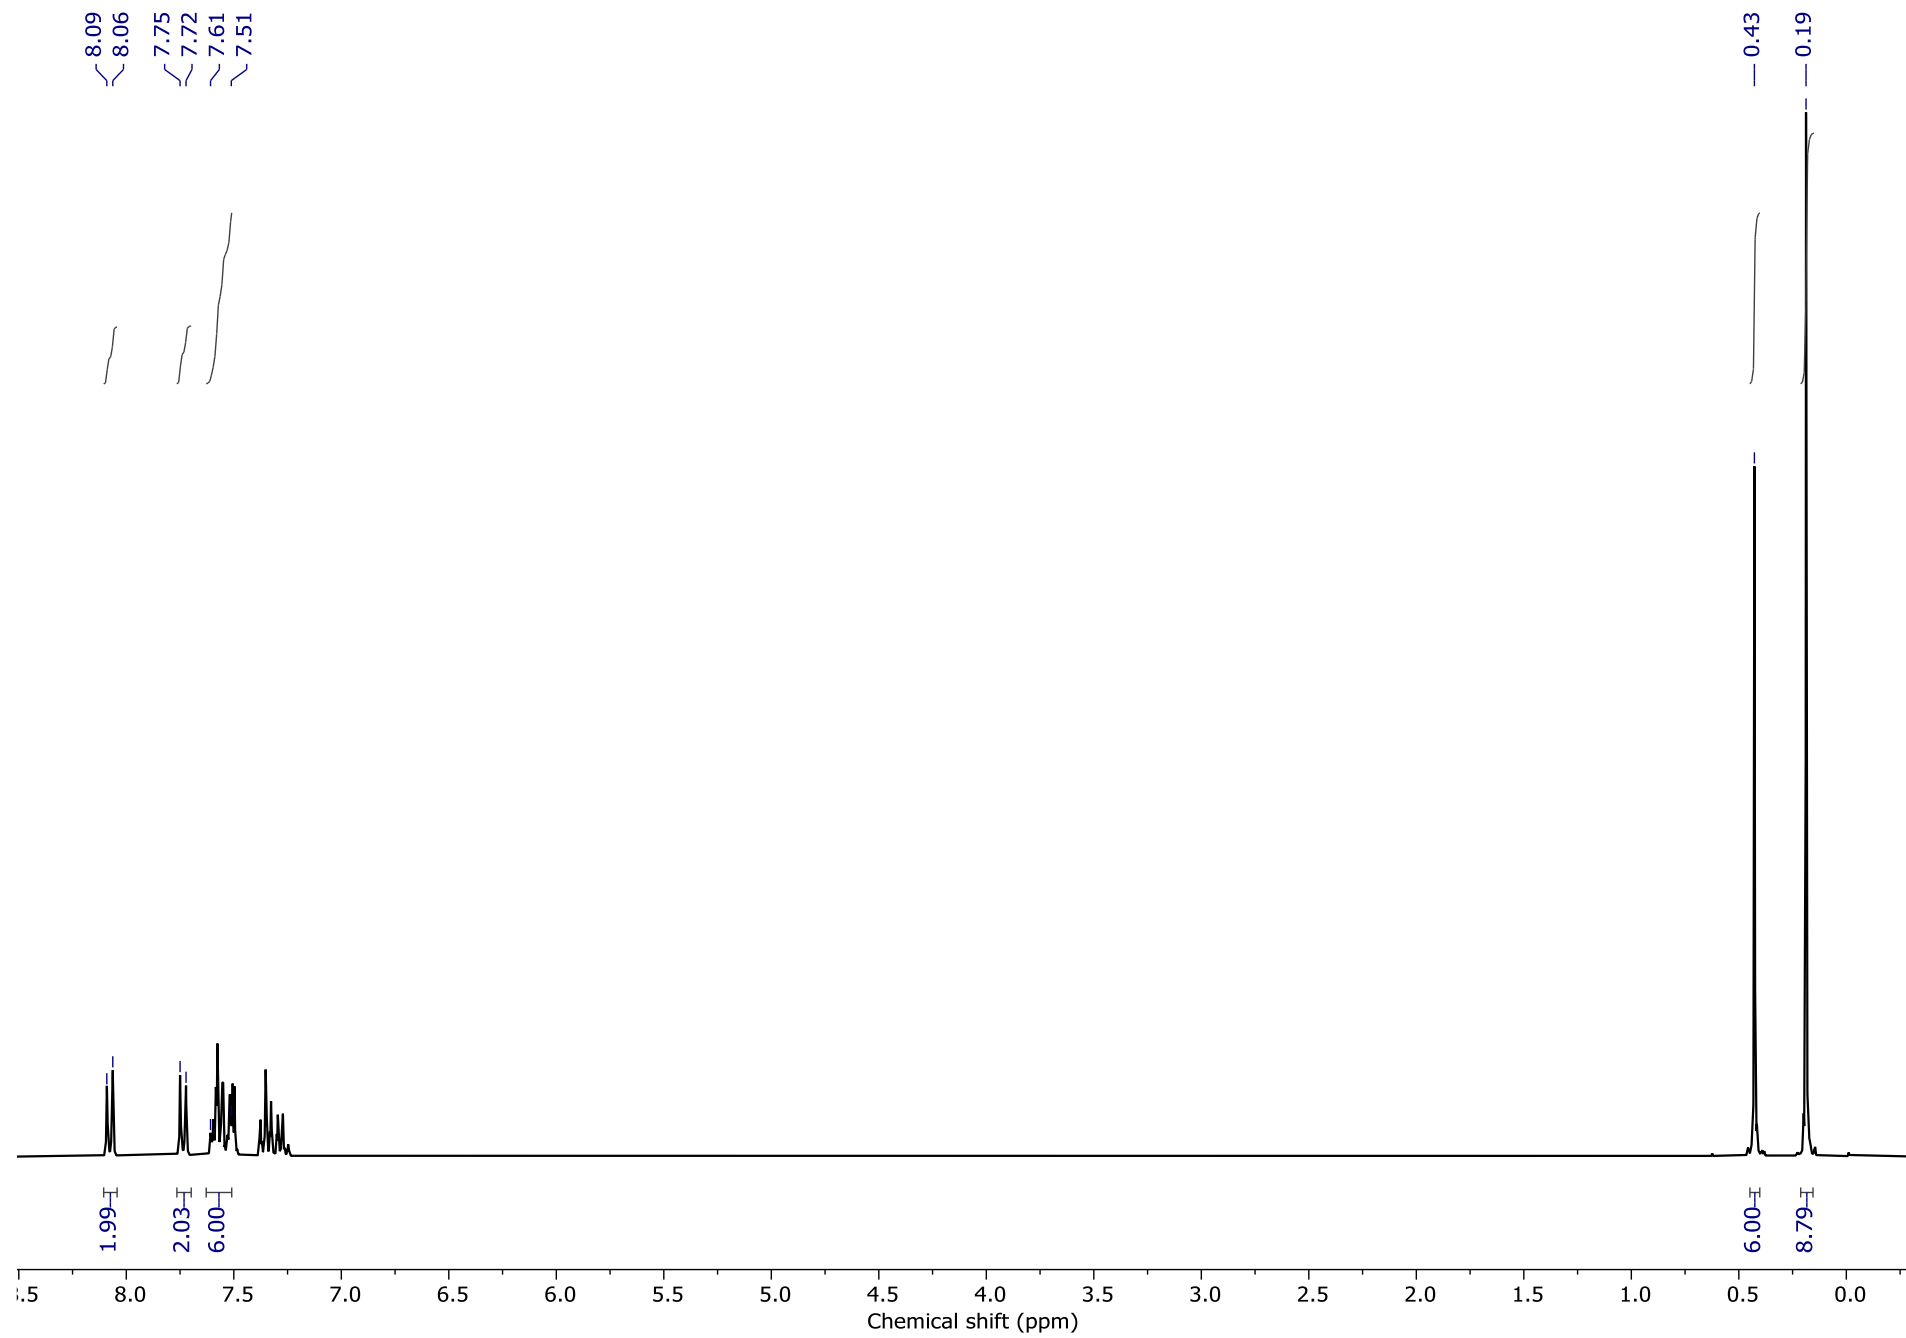



S161

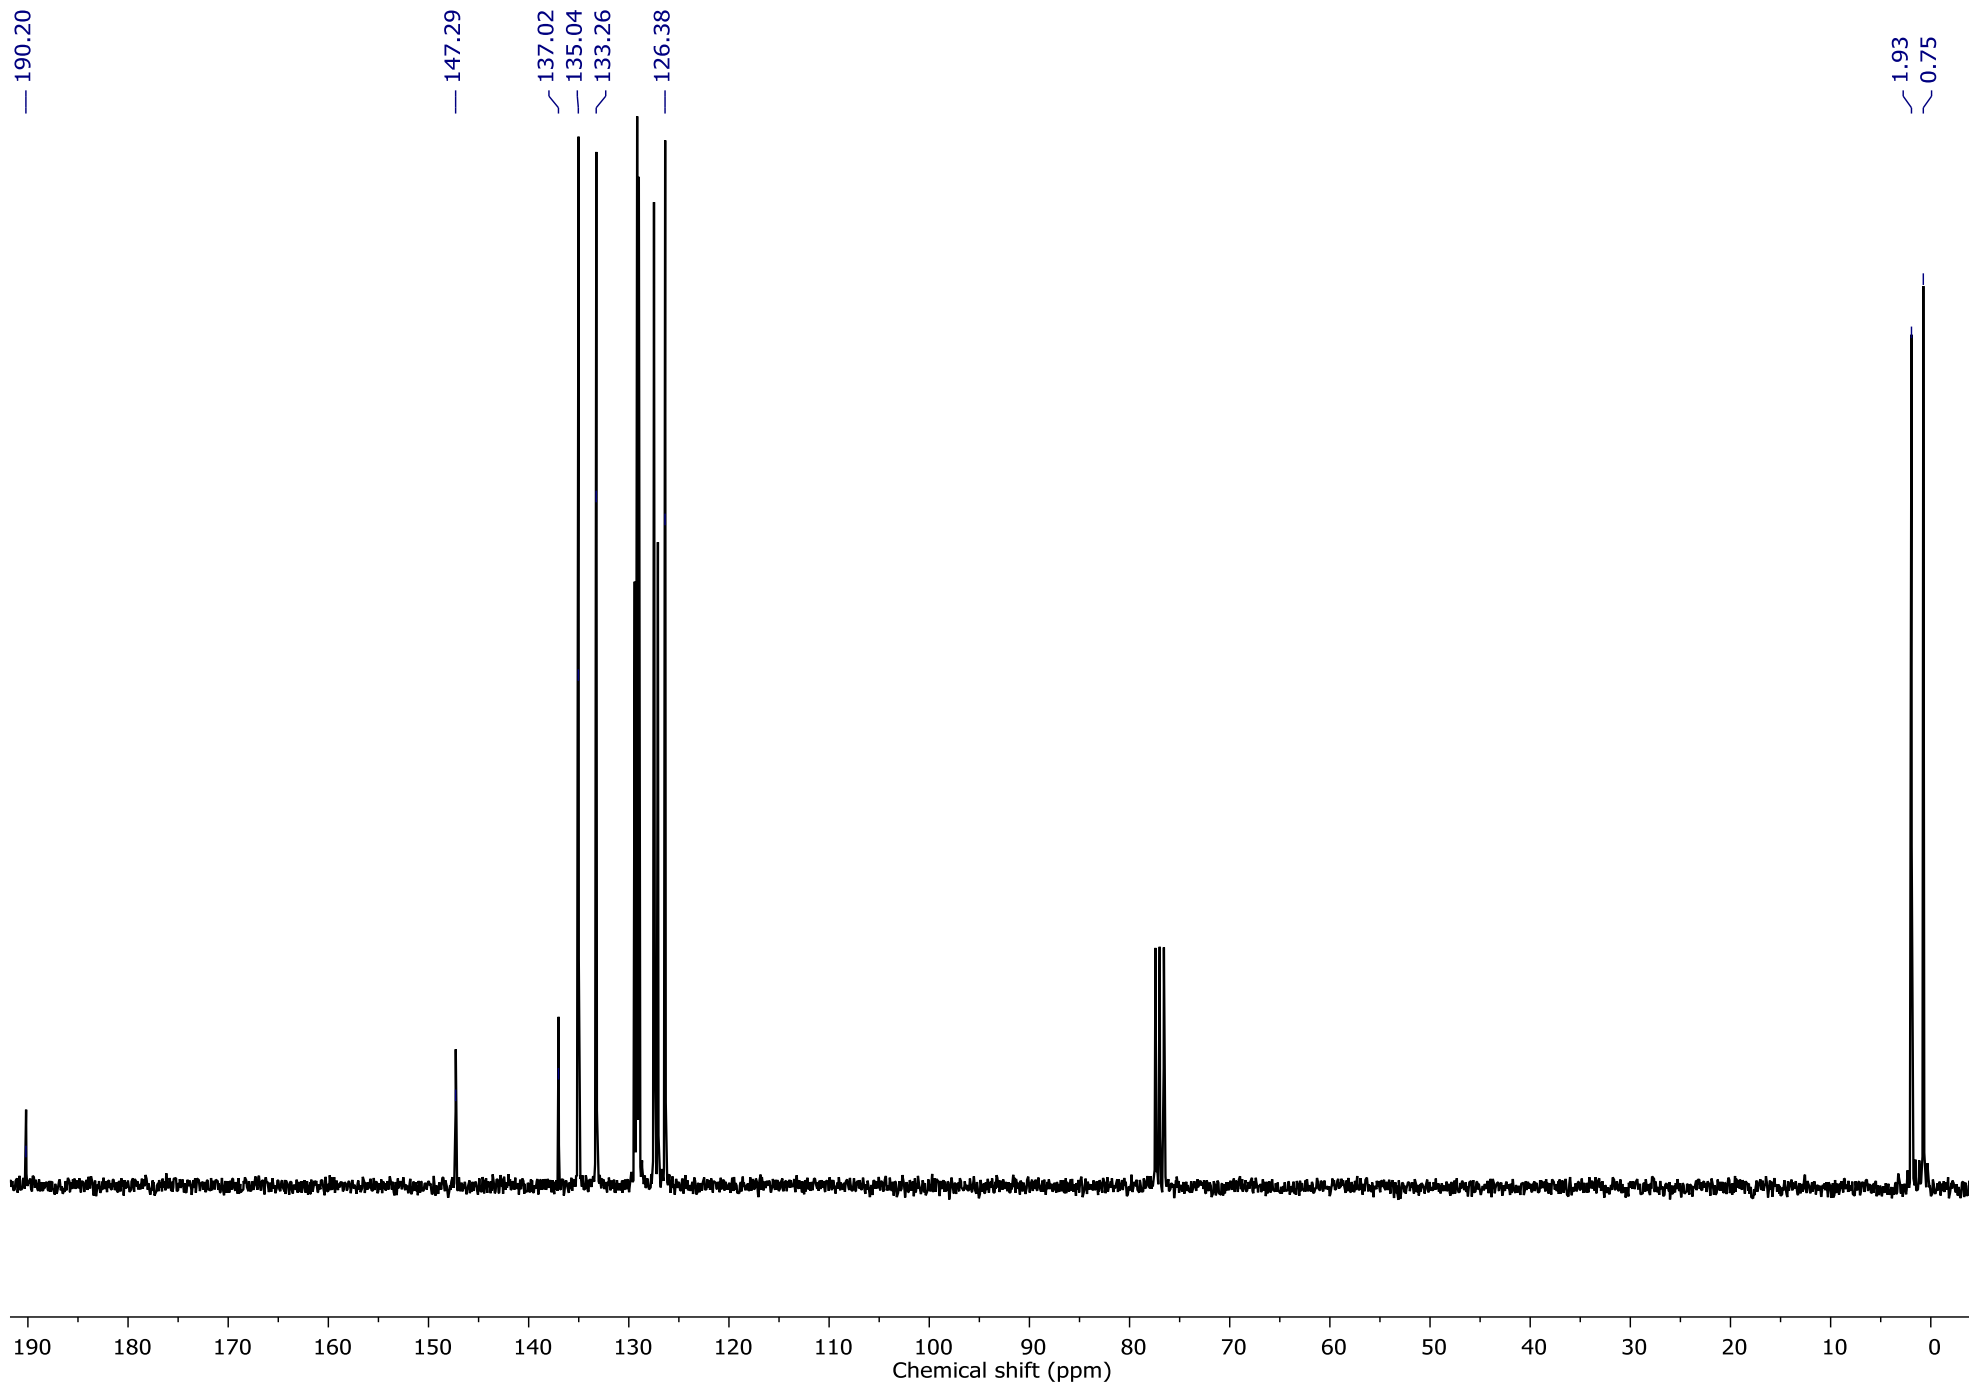

S162

9.63

-2.67

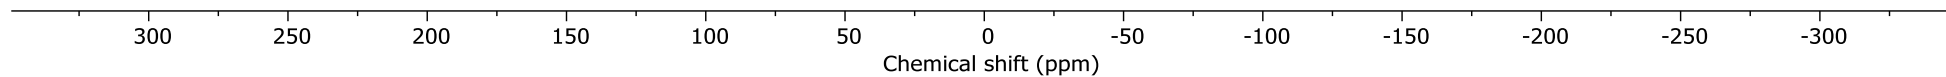

HRMS (ESI)

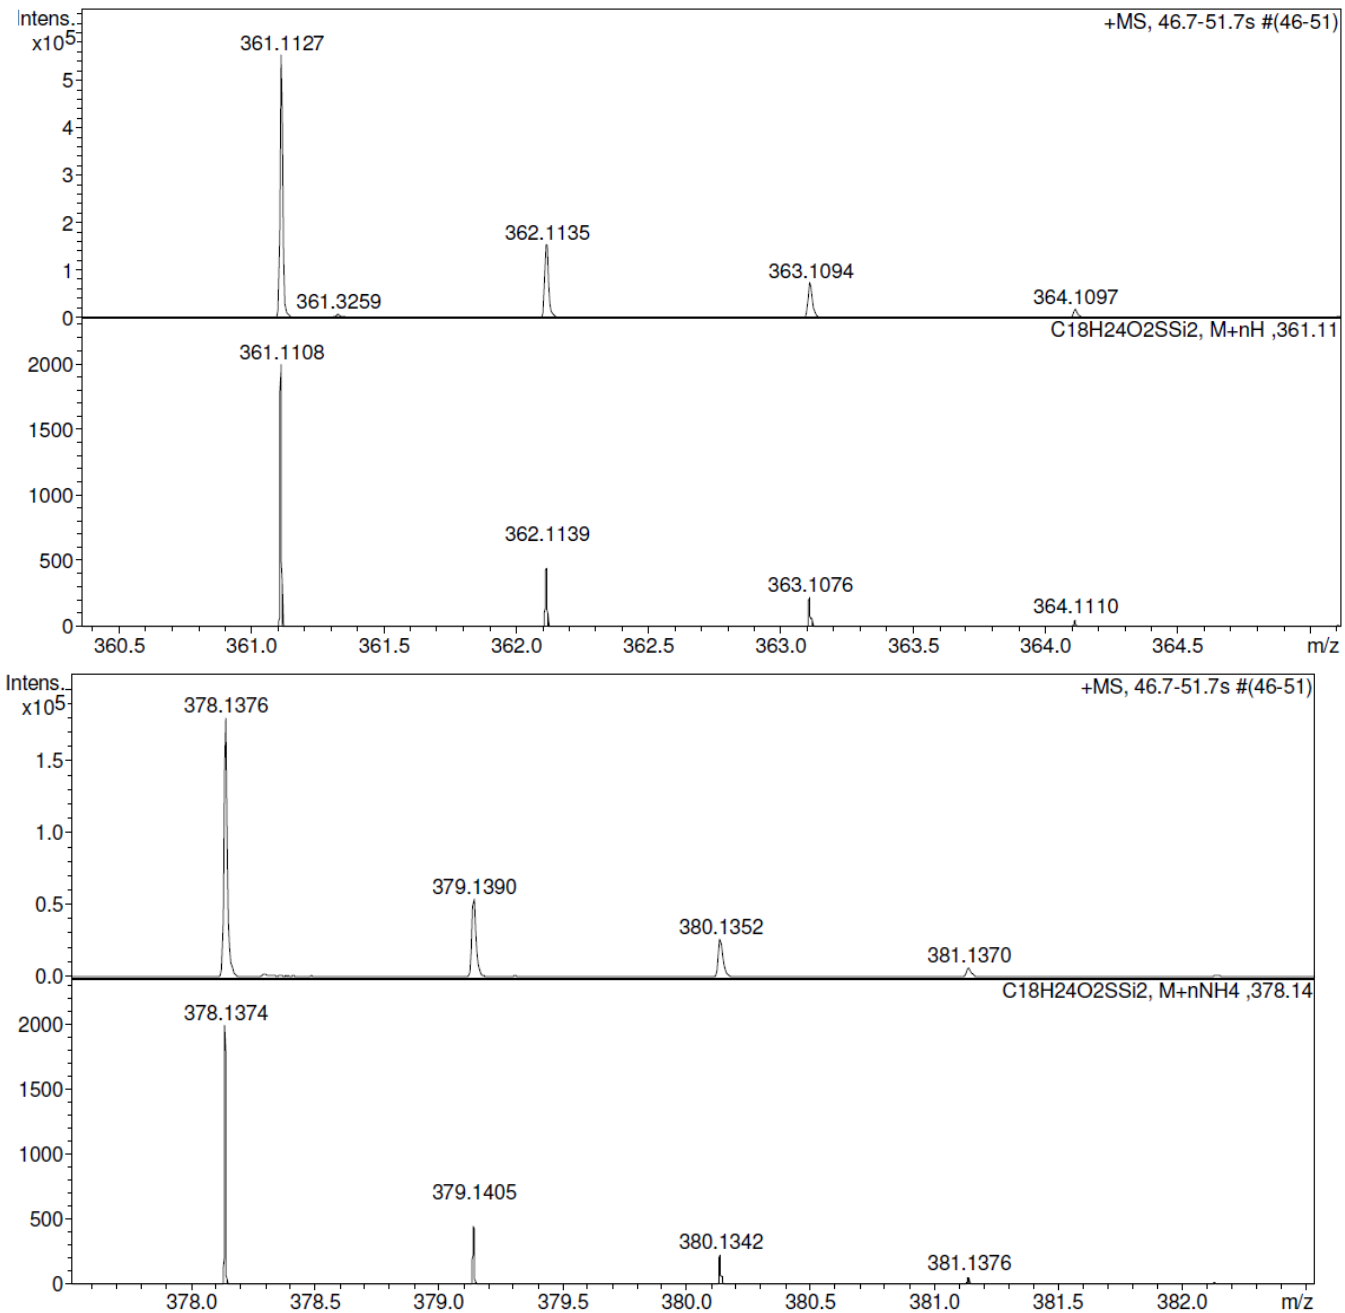

S164

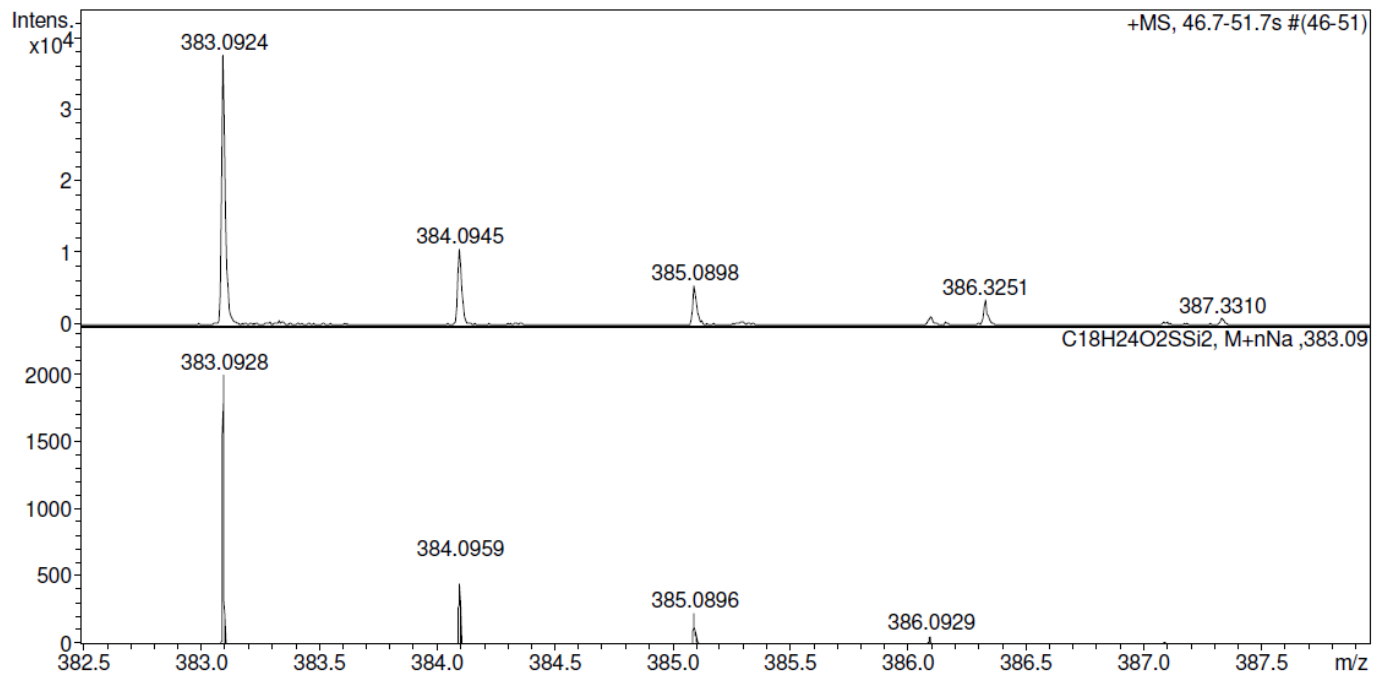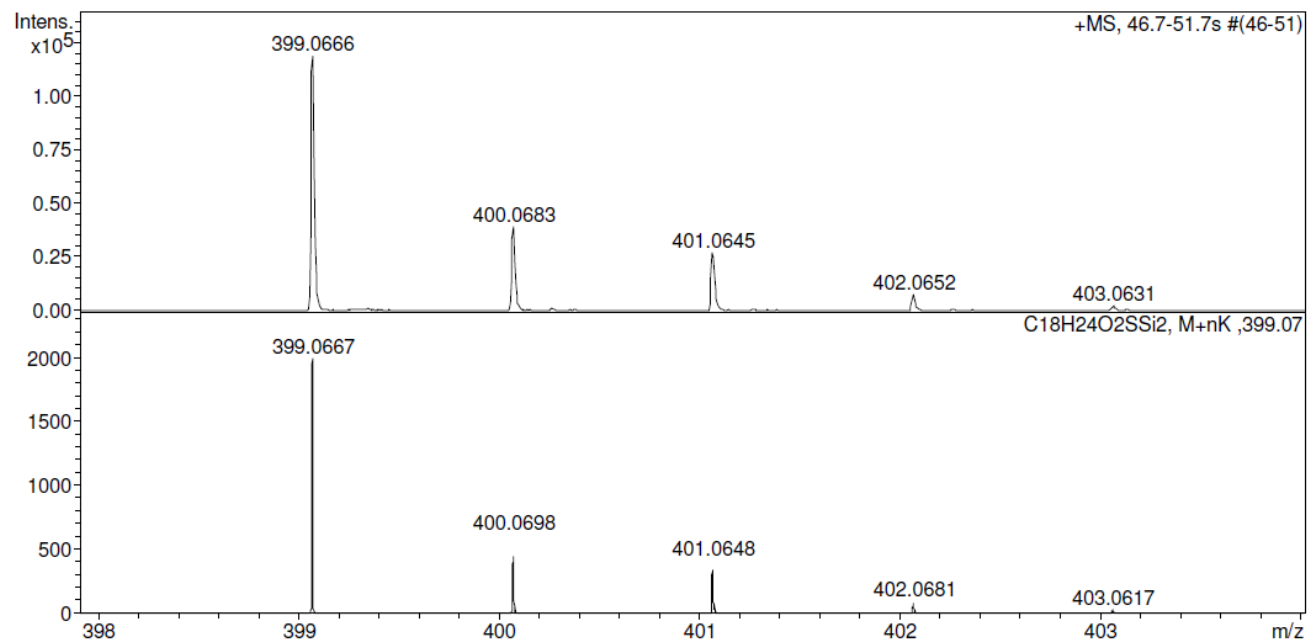

S165

IR spectrum

— 3063

— 2899

— 1685

~ 1579

~ 1479

~ 1441

~ 1387

~ 1254

~ 1209

~ 1182

— 1052

— 903

— 842

— 646

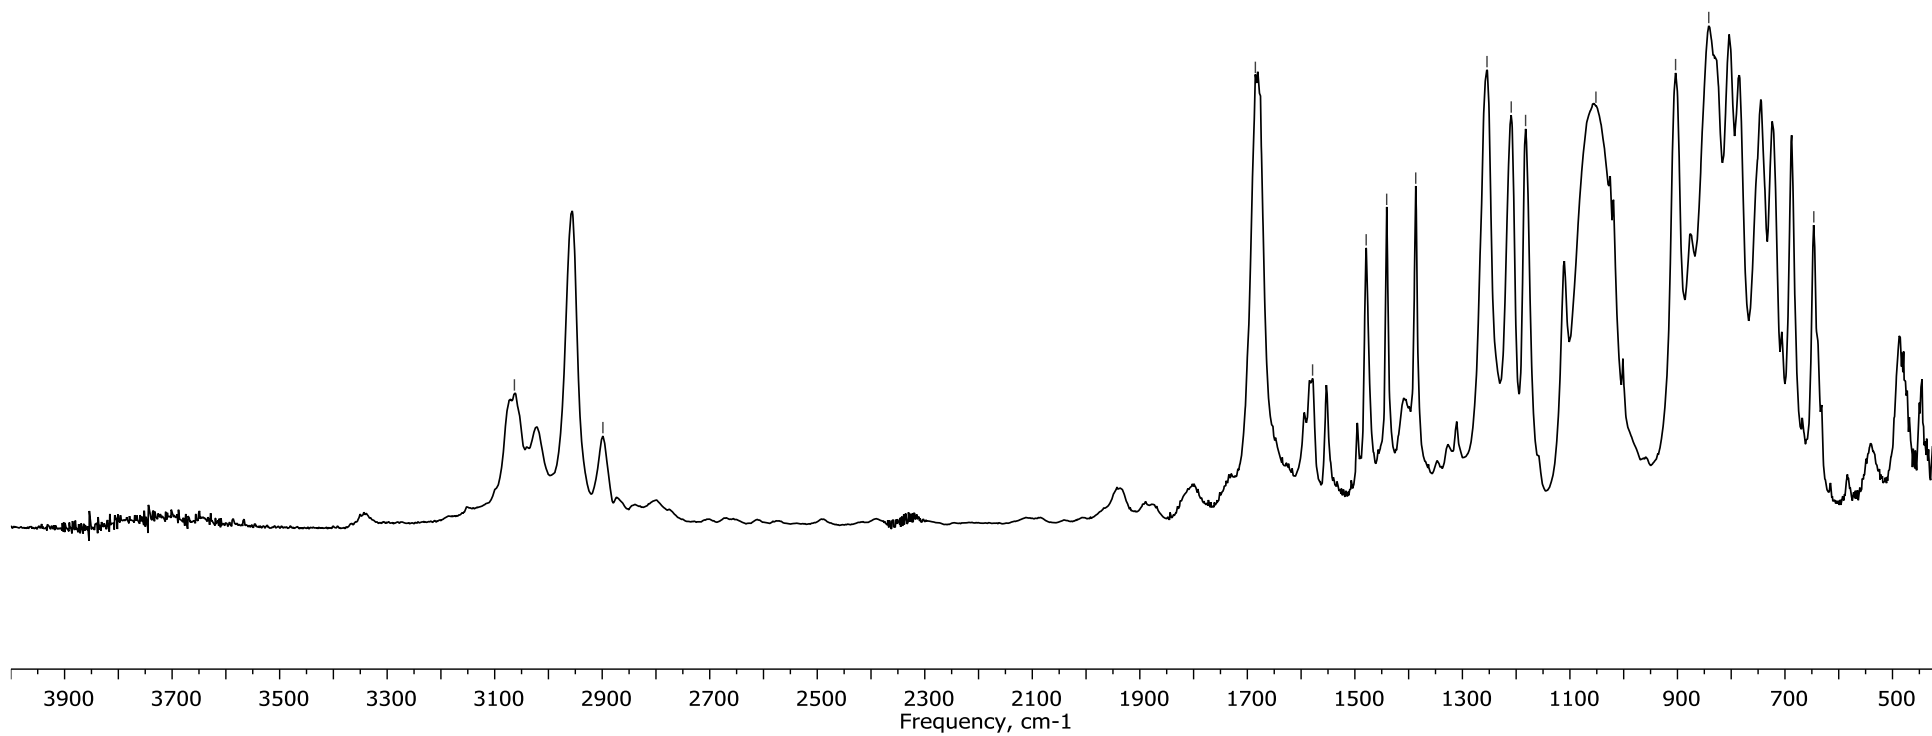

Supplement: d2nj03872b2.pdf [file d2nj03872b2.pdf]
