# Supplementary material for: Siloxane-containing derivatives of benzoic acid: chemical transformation of the carboxyl group
Source: Royal Society of Chemistry journal article supplement (doi:10.1039/d2nj03872b), 2022-01-01

## SUPPORTING INFORMATION

### **Siloxane-Containing Derivatives of Benzoic Acid: Chemical Transformation of the Carboxyl Group.**

#### **Supp.Inf.3: NMR, ESI HRMS and IR spectra for 3ba-bm**

Irina K. Goncharova,<sup>\*a,b</sup> Eva A. Ulianova,<sup>a,c</sup> Roman A. Novikov,<sup>d</sup> Alexander D. Volodin,<sup>a</sup> Alexander A. Korlyukov,<sup>a</sup> Ashot V. Arzumanyan<sup>\*a,b</sup>

#### AUTHOR ADDRESS

<sup>a</sup> A. N. Nesmeyanov Institute of Organoelement Compounds, Russian Academy of Sciences, 28 Vavilov St., Moscow 119991, Russian Federation

<sup>b</sup> A.V. Topchiev Institute of Petrochemical Synthesis, Russian Academy of Sciences, 119991 Moscow, Russian Federation

<sup>c</sup> HZ University of Applied Sciences, 4382 NW Middelburg, The Netherlands

<sup>d</sup> N.D. Zelinsky Institute of Organic Chemistry, Russian Academy of Sciences, 119991 Moscow, Russian Federation

S2

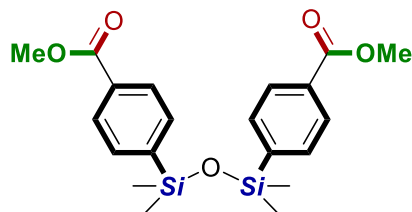

**Characterisation data for dimethyl 4,4'-(1,1,3,3-tetramethyldisiloxane-1,3-diyl)dibenzoate:**

$^1\text{H}$  NMR (400 MHz, DMSO- $d_6$ ):  $\delta = 7.93$  (d,  $^3J=11$  Hz, 4H),  $\delta = 7.65$  (d,  $^3J=11$  Hz, 4H),  $\delta = 3.84$  (s, 6H),  $\delta = 0.32$  (s, 12H).  
 $^{13}\text{C}$  NMR (100 MHz, DMSO- $d_6$ ):  $\delta = 166.17, 145.04, 133.03, 130.38, 128.14, 52.03, 0.42$ .  $^{29}\text{Si}$  NMR (80 MHz, DMSO- $d_6$ ):  $\delta = -0.30$ .  
HRMS (ESI)  $m/z$   $[\text{M} + \text{NH}_4]^+$  : calcd for  $[\text{C}_{20}\text{H}_{26}\text{O}_5\text{Si}_2 + \text{NH}_4]^+$ , 420.1657; found, 420.1656;  $[\text{M} + \text{Na}]^+$  : calcd for  $[\text{C}_{20}\text{H}_{26}\text{O}_5\text{Si}_2 + \text{Na}]^+$ , 425.1211; found, 425.1214;  $[\text{M} + \text{K}]^+$  : calcd for  $[\text{C}_{20}\text{H}_{26}\text{O}_5\text{Si}_2 + \text{K}]^+$ , 441.0950; found, 441.0948. IR (cm $^{-1}$ ): 3424, 2955, 1723, 1282, 1098.

<sup>1</sup>H NMR

(400 MHz, DMSO-d6)

S3

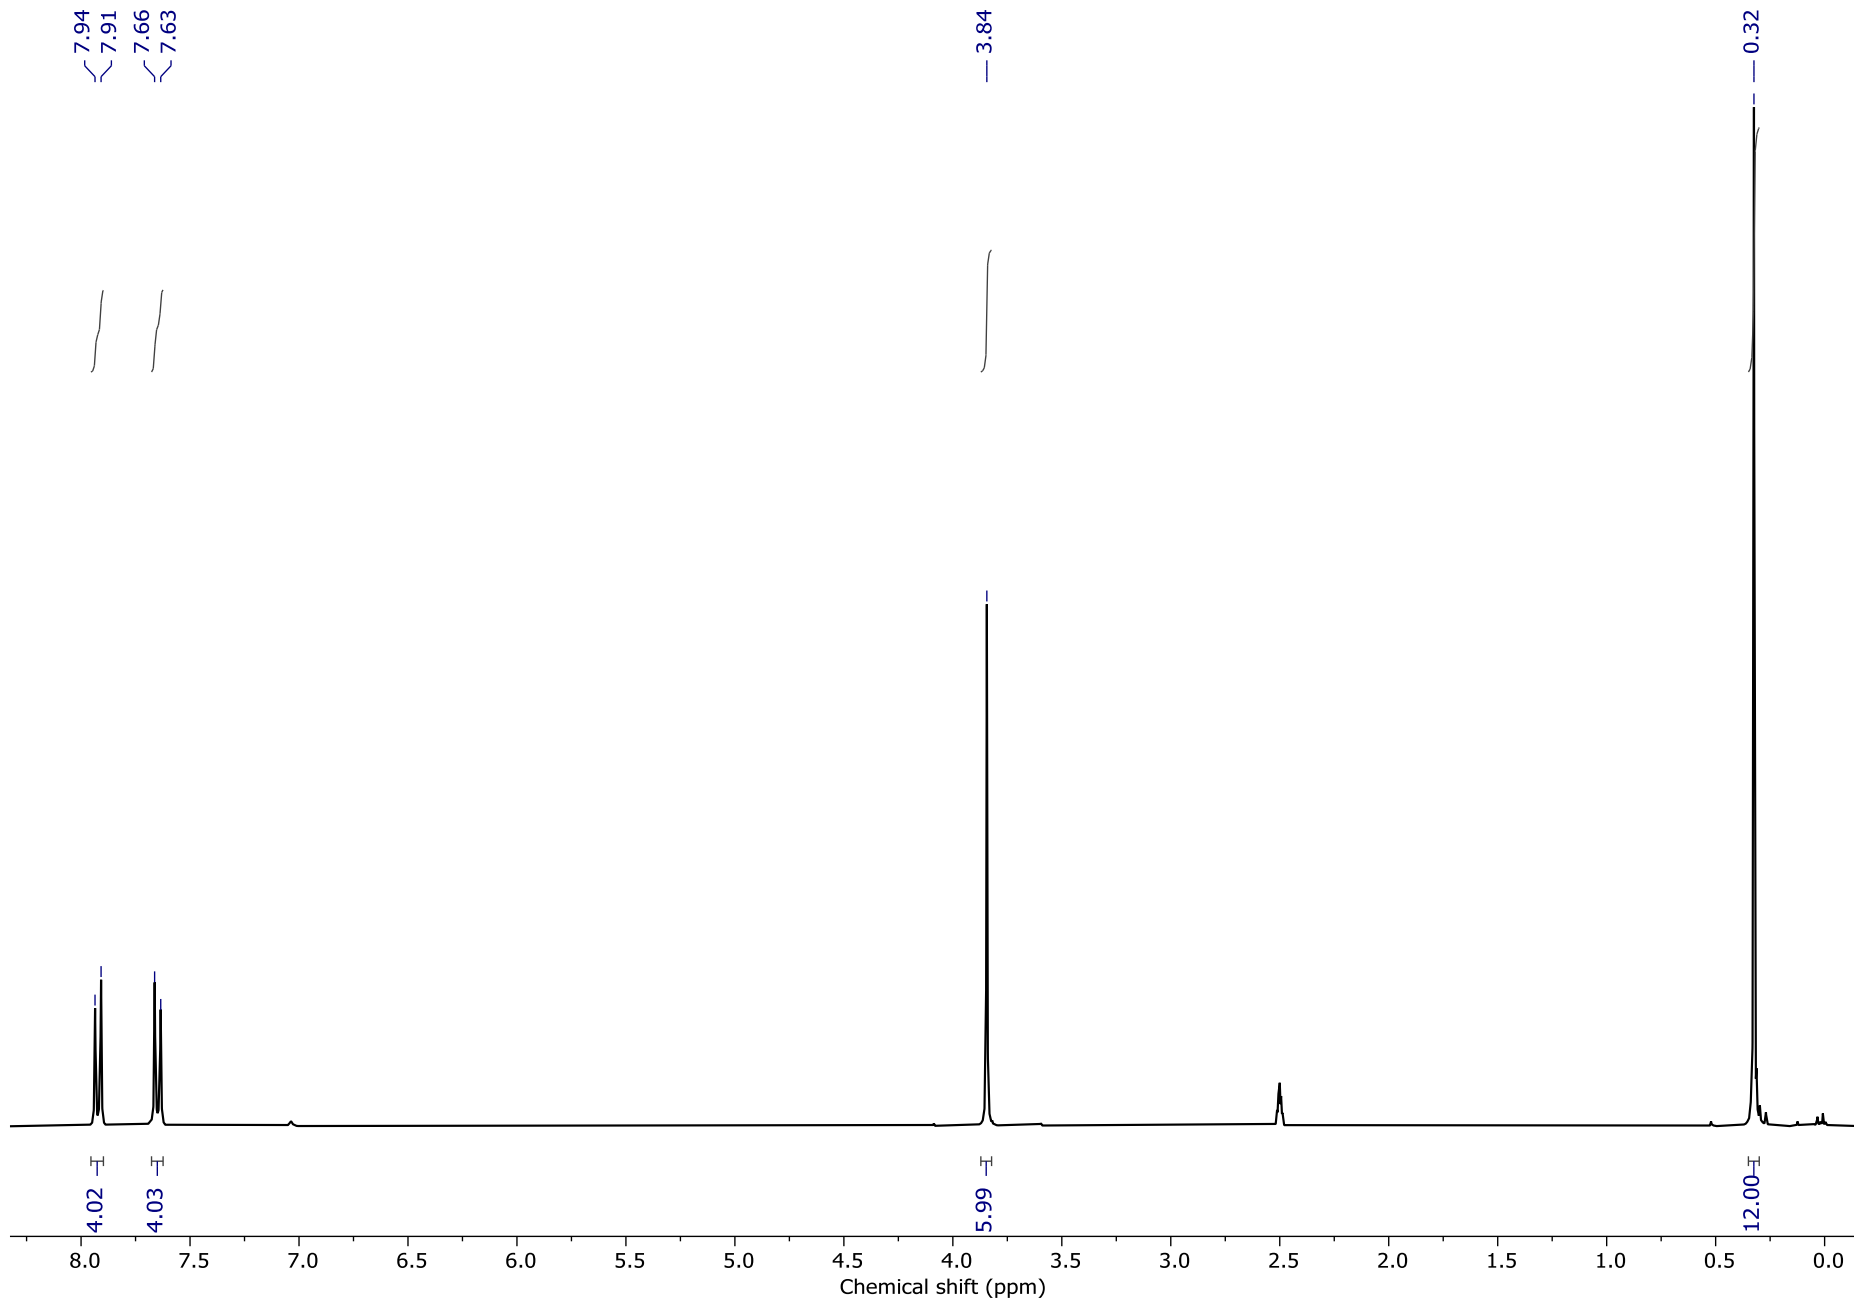

<sup>13</sup>C NMR

(100 MHz, DMSO-d<sub>6</sub>)

S4

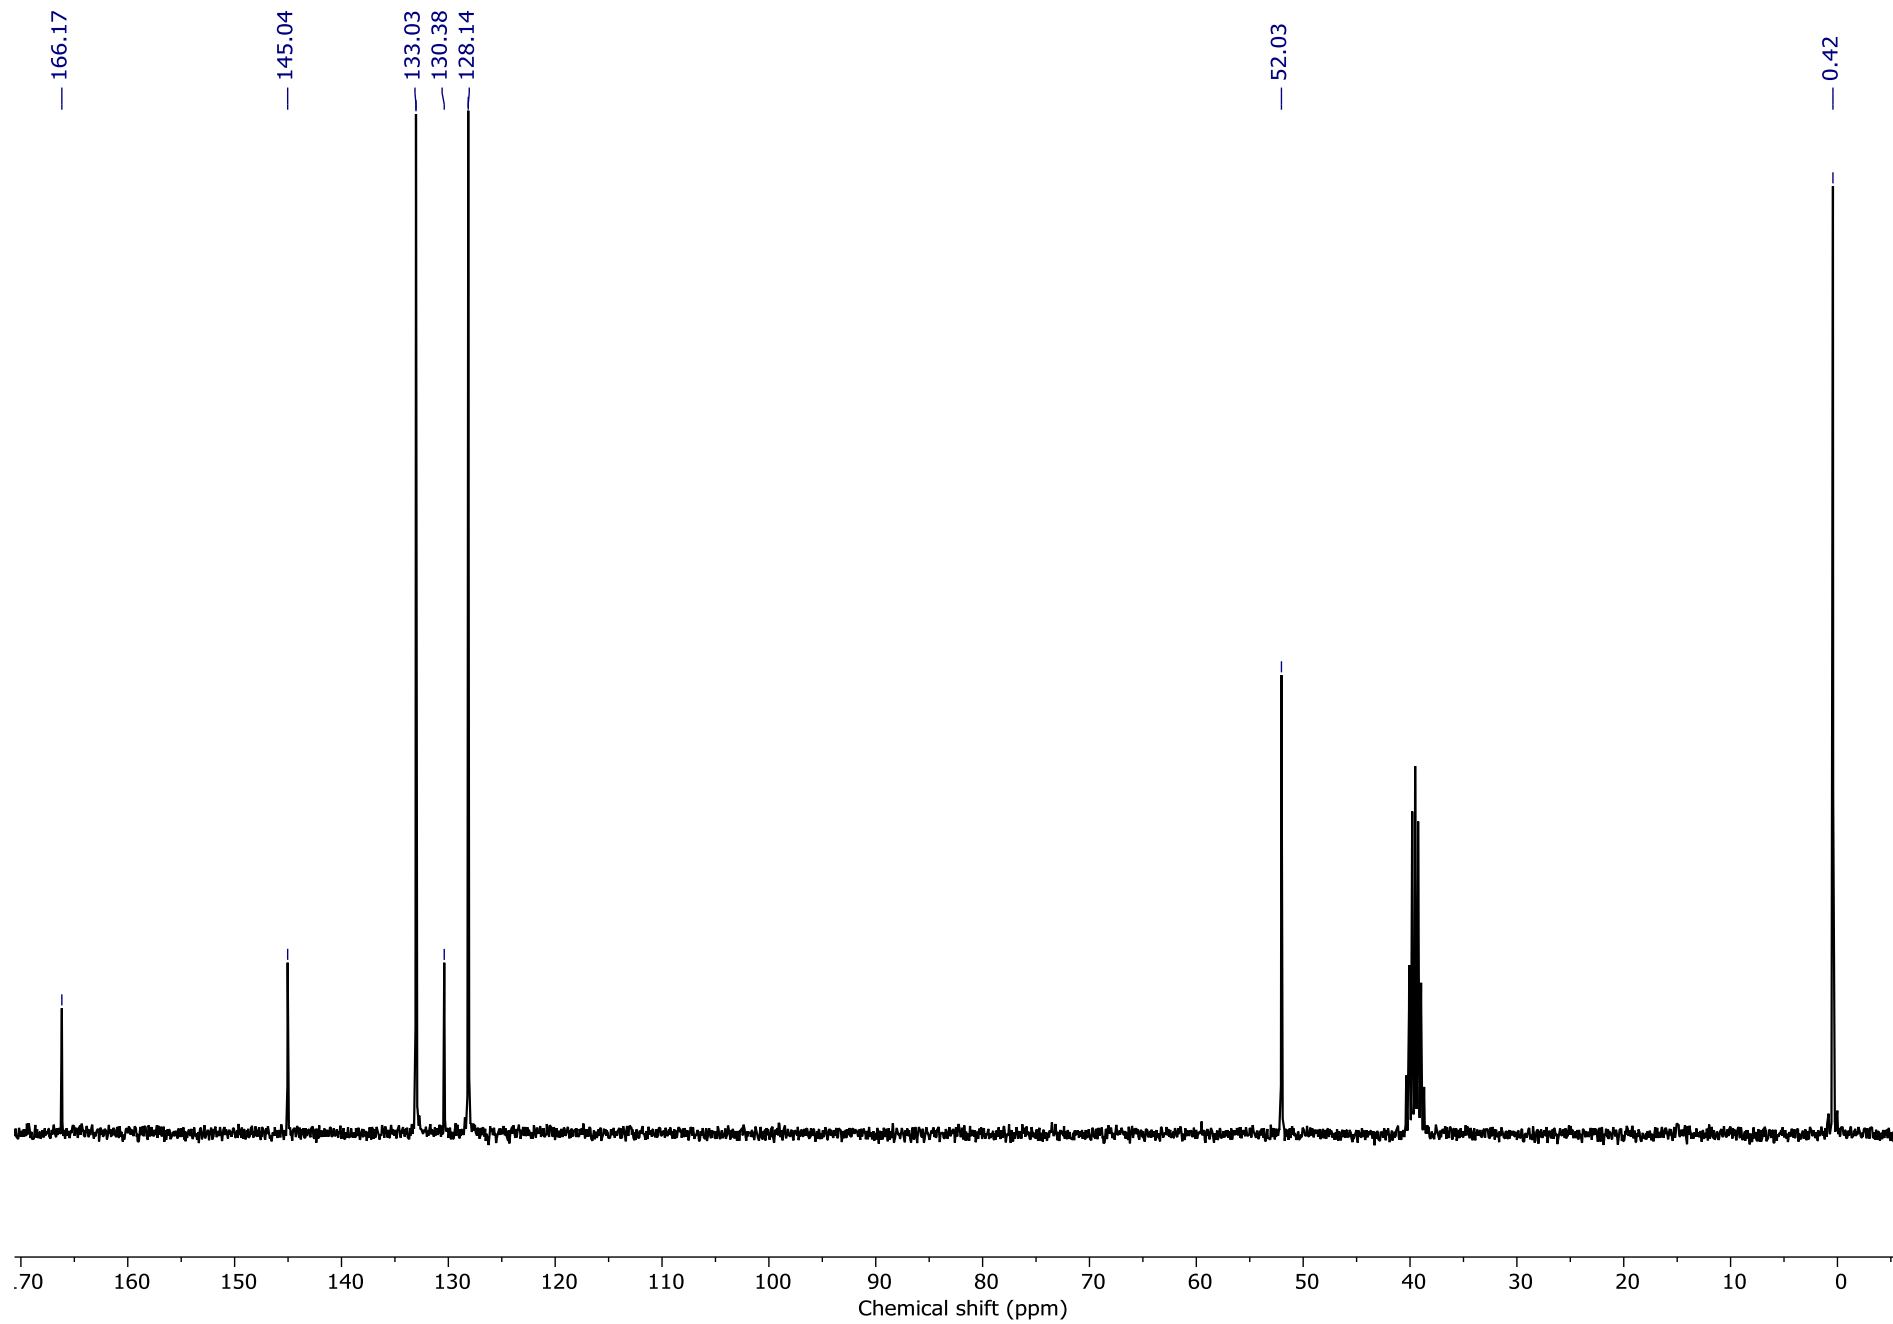

$^{29}\text{Si}$  NMR  
(80 MHz, DMSO-d6)

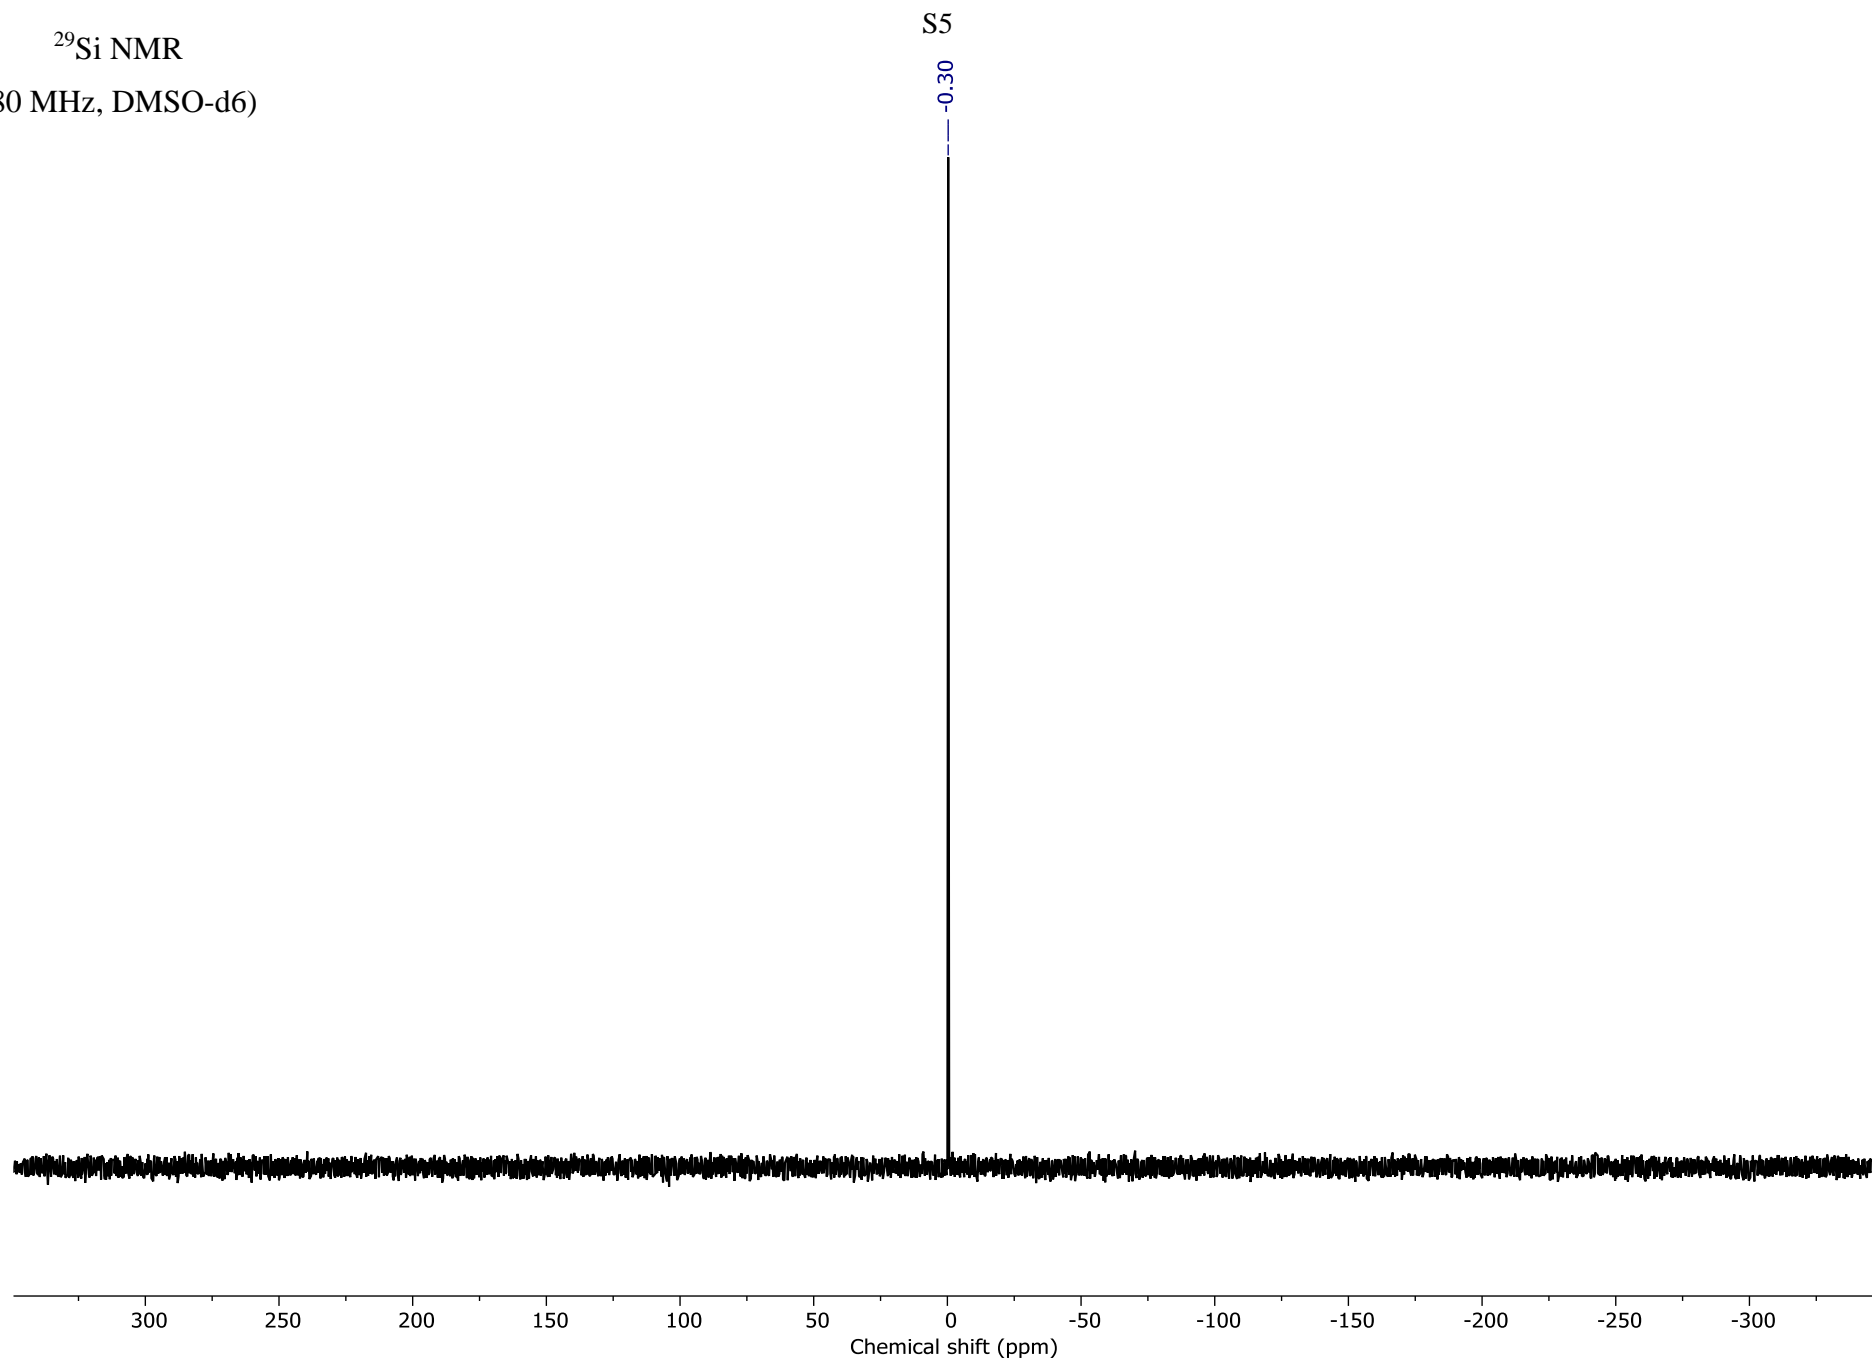

$^1\text{H} - ^{13}\text{C}$  HMBC  
(400 MHz, DMSO-d<sub>6</sub>)

S6

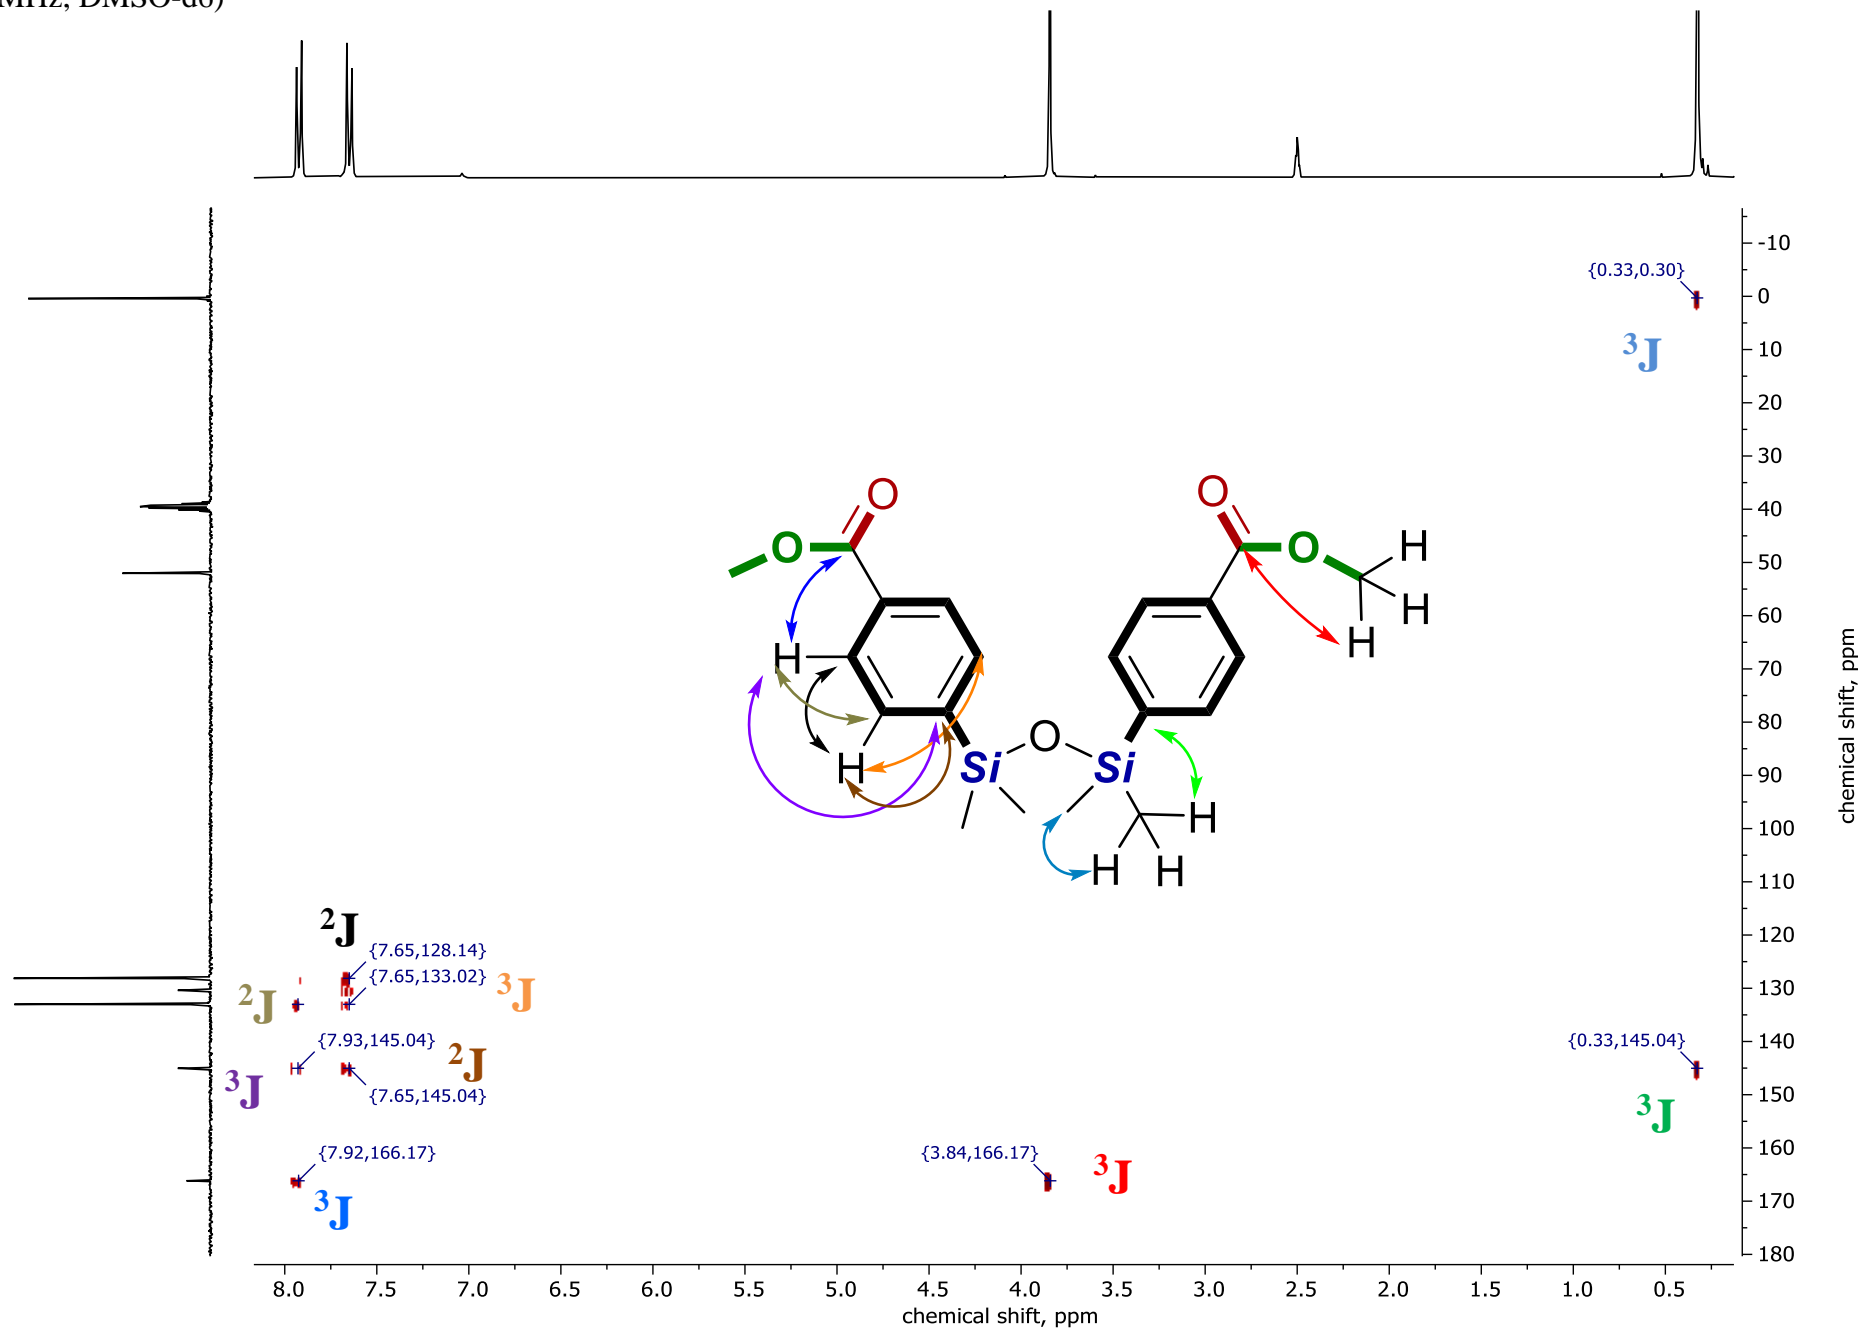

$^1\text{H} - ^{13}\text{C}$  HSQC  
(400 MHz, DMSO-d<sub>6</sub>)

S7

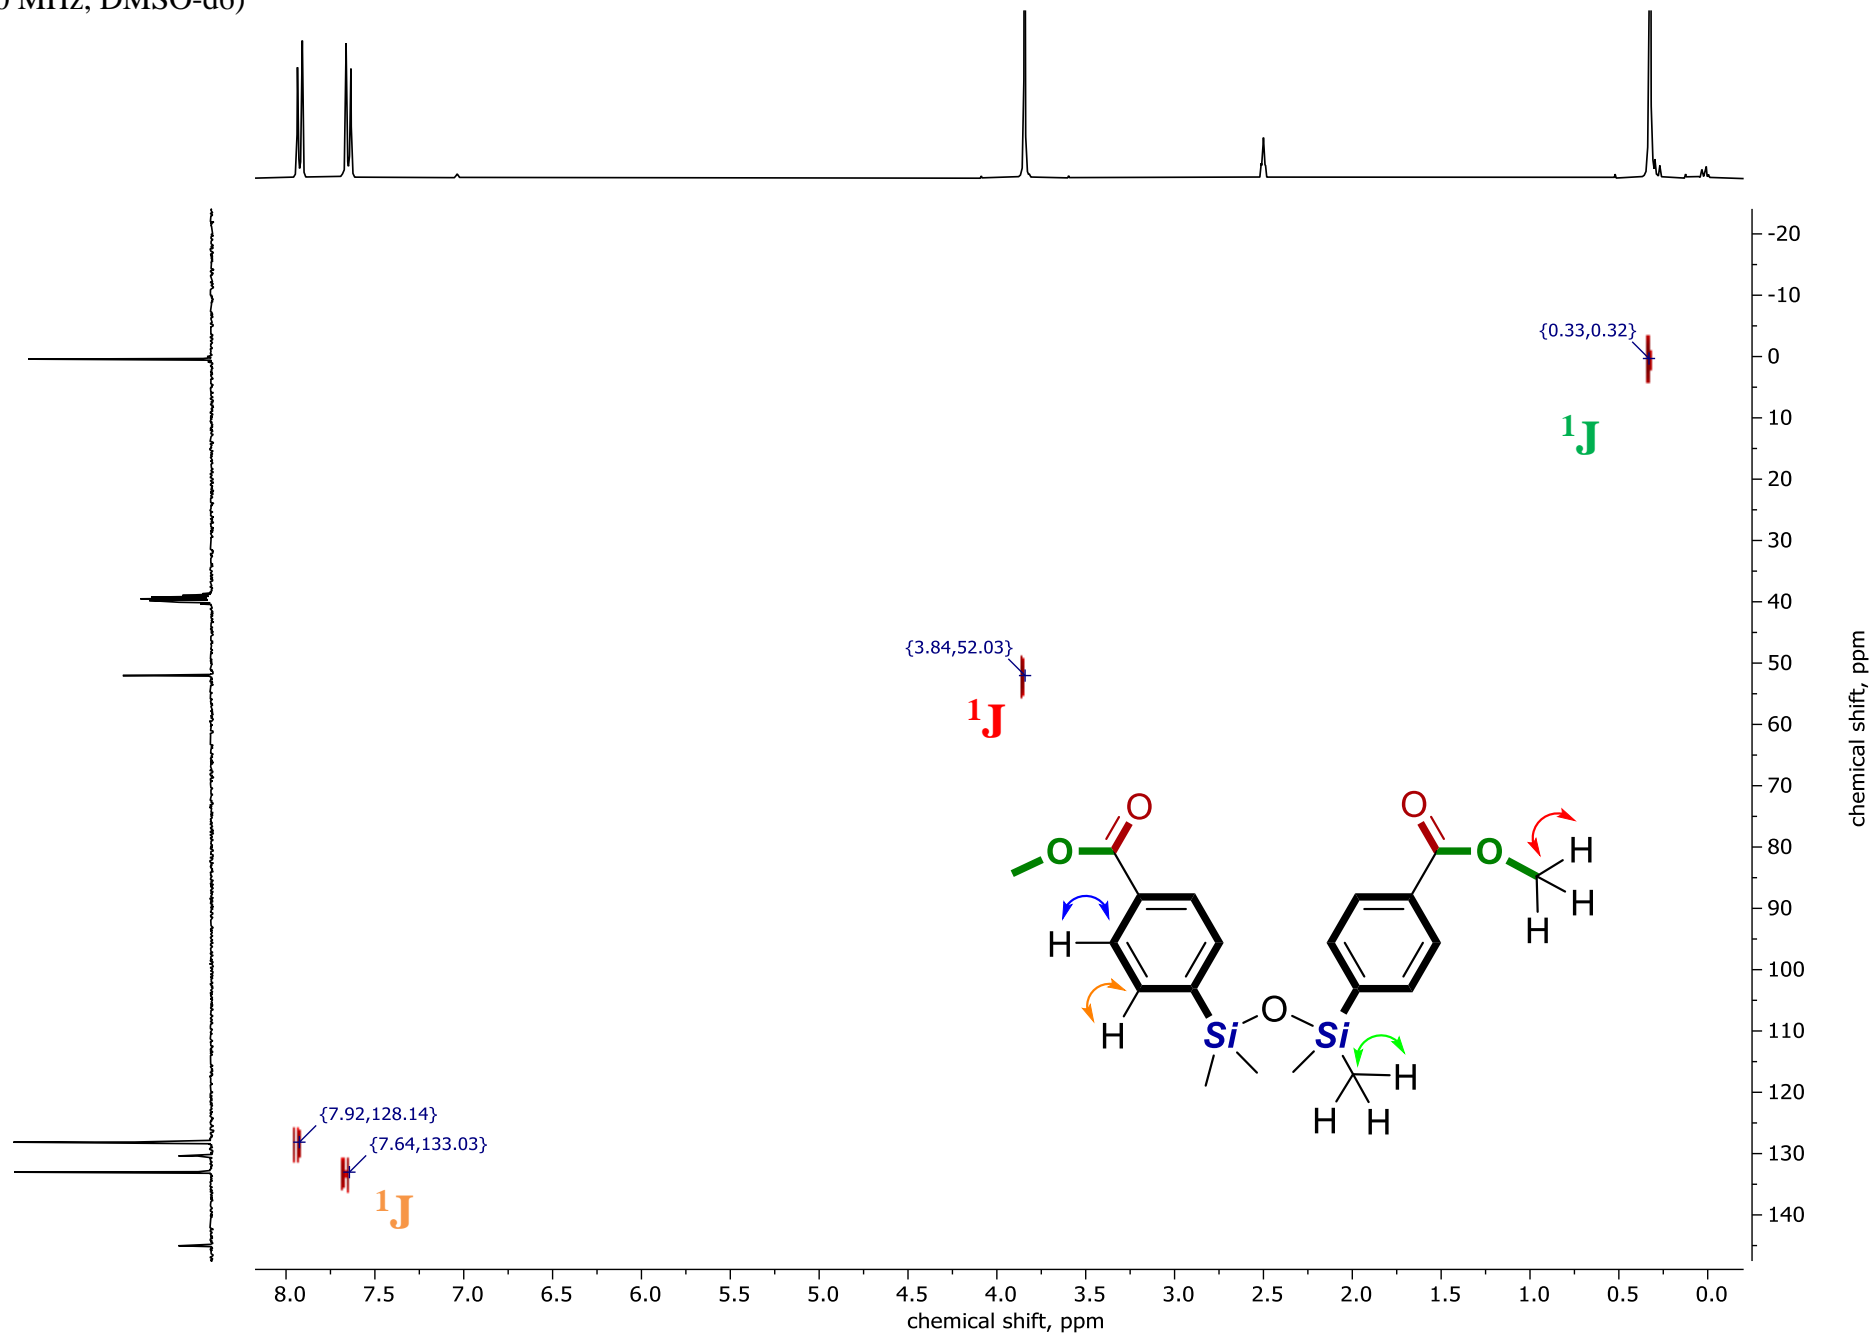

$^1\text{H} - ^{29}\text{Si}$  HMBC  
(400 MHz, DMSO-d6)

S8

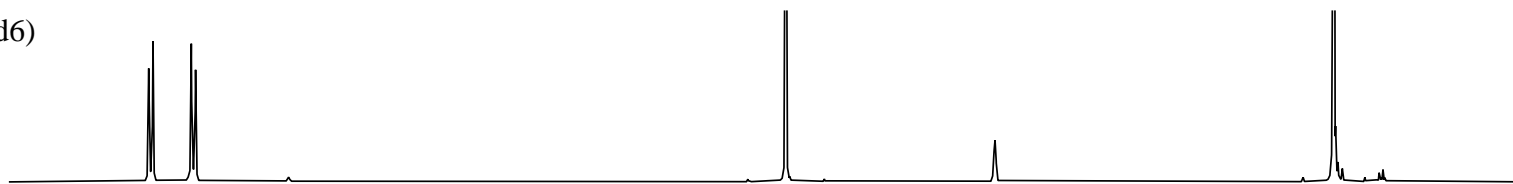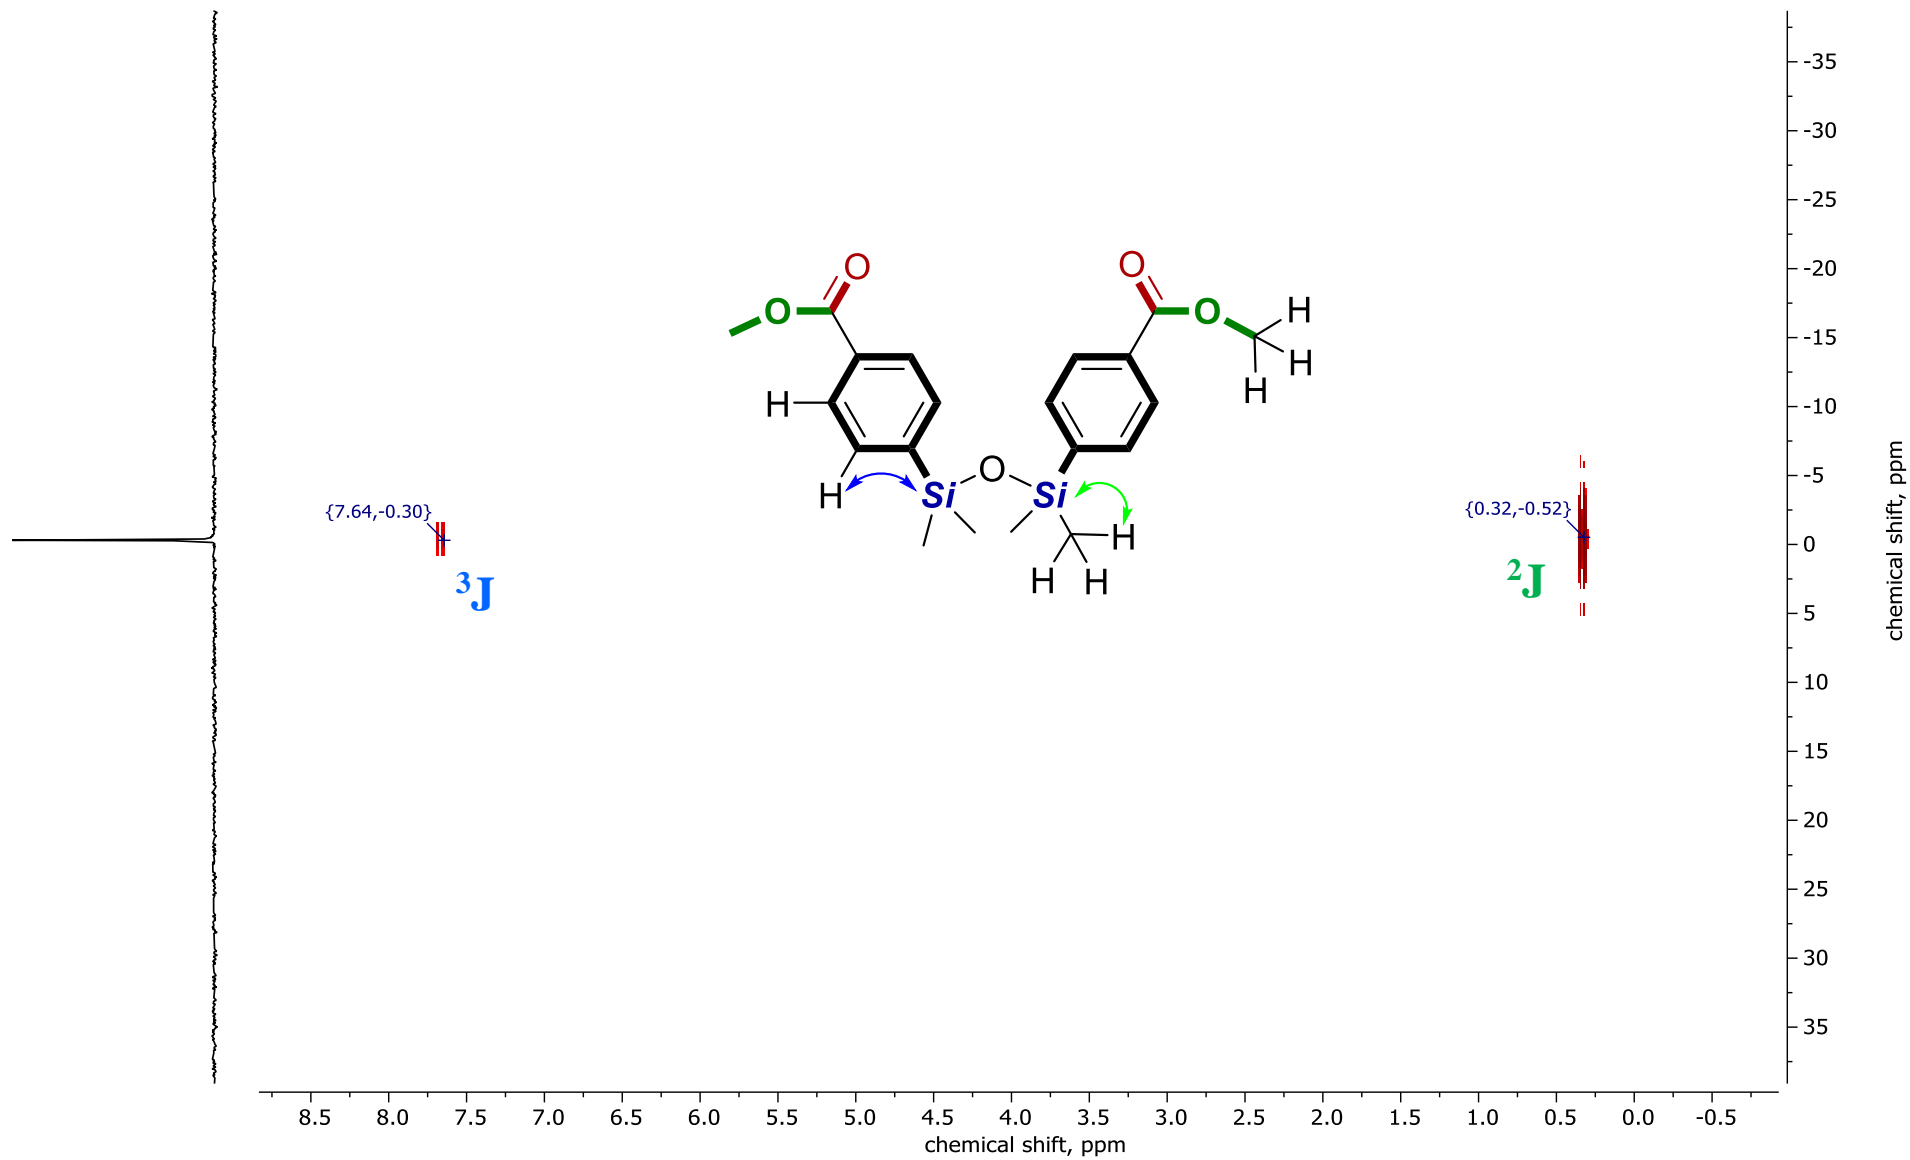



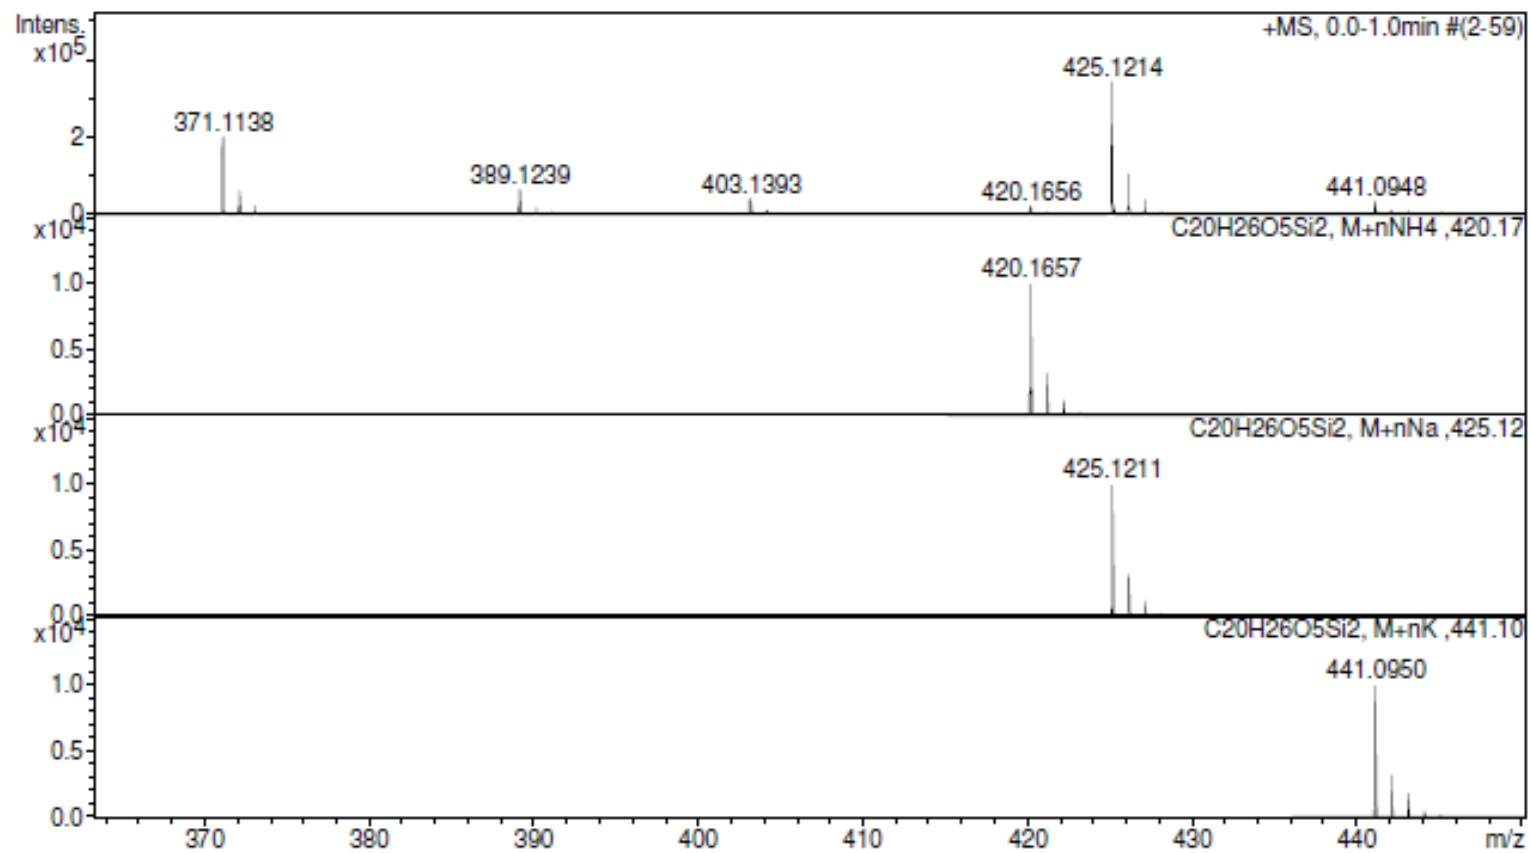

IR Spectrum

S10

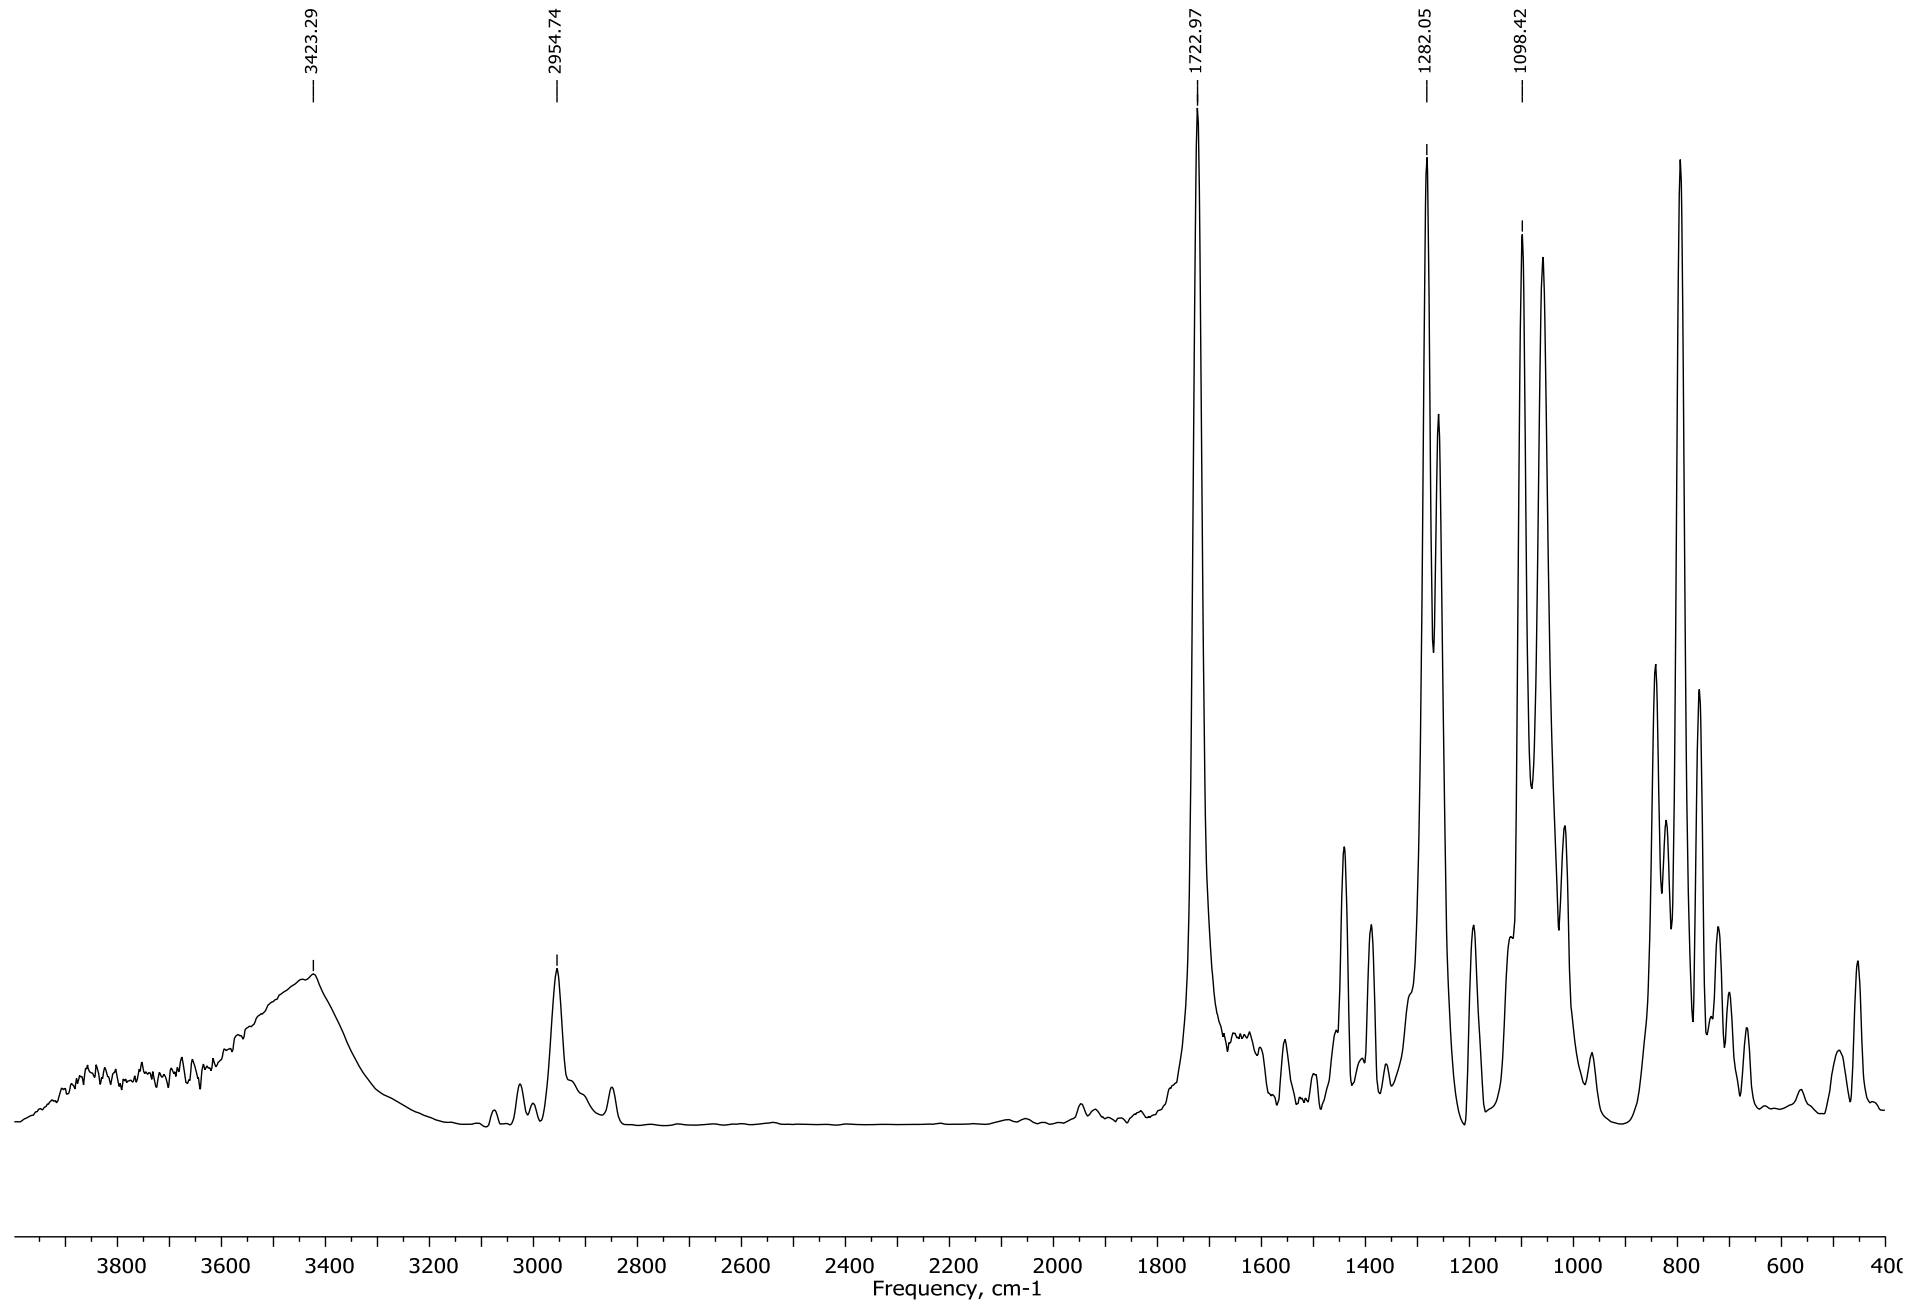

S11

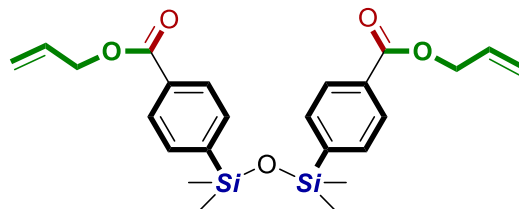

**Characterisation data for diallyl 4,4'-(1,1,3,3-tetramethyldisiloxane-1,3-diyl)dibenzoate:**

$^1\text{H}$  NMR (400 MHz, acetone- $d_6$ ):  $\delta$  = 8.03 (d,  $^3J=6$  Hz, 4H),  $\delta$  = 7.74 (d,  $^3J=6$  Hz, 4H),  $\delta$  = 6.13-6.03 (m, 2H),  $\delta$  = 5.45-5.26 (m, 4H),  $\delta$  = 4.83 (m, 4H),  $\delta$  = 0.39 (s, 12H).  $^{13}\text{C}$  NMR (100 MHz, acetone- $d_6$ ):  $\delta$  = 166.39, 146.37, 134.02, 133.56, 131.81, 129.25, 118.13, 65.96, 0.77.  $^{29}\text{Si}$  NMR (80 MHz, acetone- $d_6$ ):  $\delta$  = -0.31. HRMS (ESI)  $m/z$   $[\text{M} + \text{H}]^+$ : calcd for  $[\text{C}_{24}\text{H}_{30}\text{O}_5\text{Si}_2 + \text{H}]^+$ , 455.1705; found, 455.1710. IR ( $\text{cm}^{-1}$ ): 3429, 3080-2900, 1942, 1717, 1649, 1601, 1557, 1498, 1455-1361, 1313-1260, 1186, 1128-663.

<sup>1</sup>H NMR

(400 MHz, acetone-d6)

S12

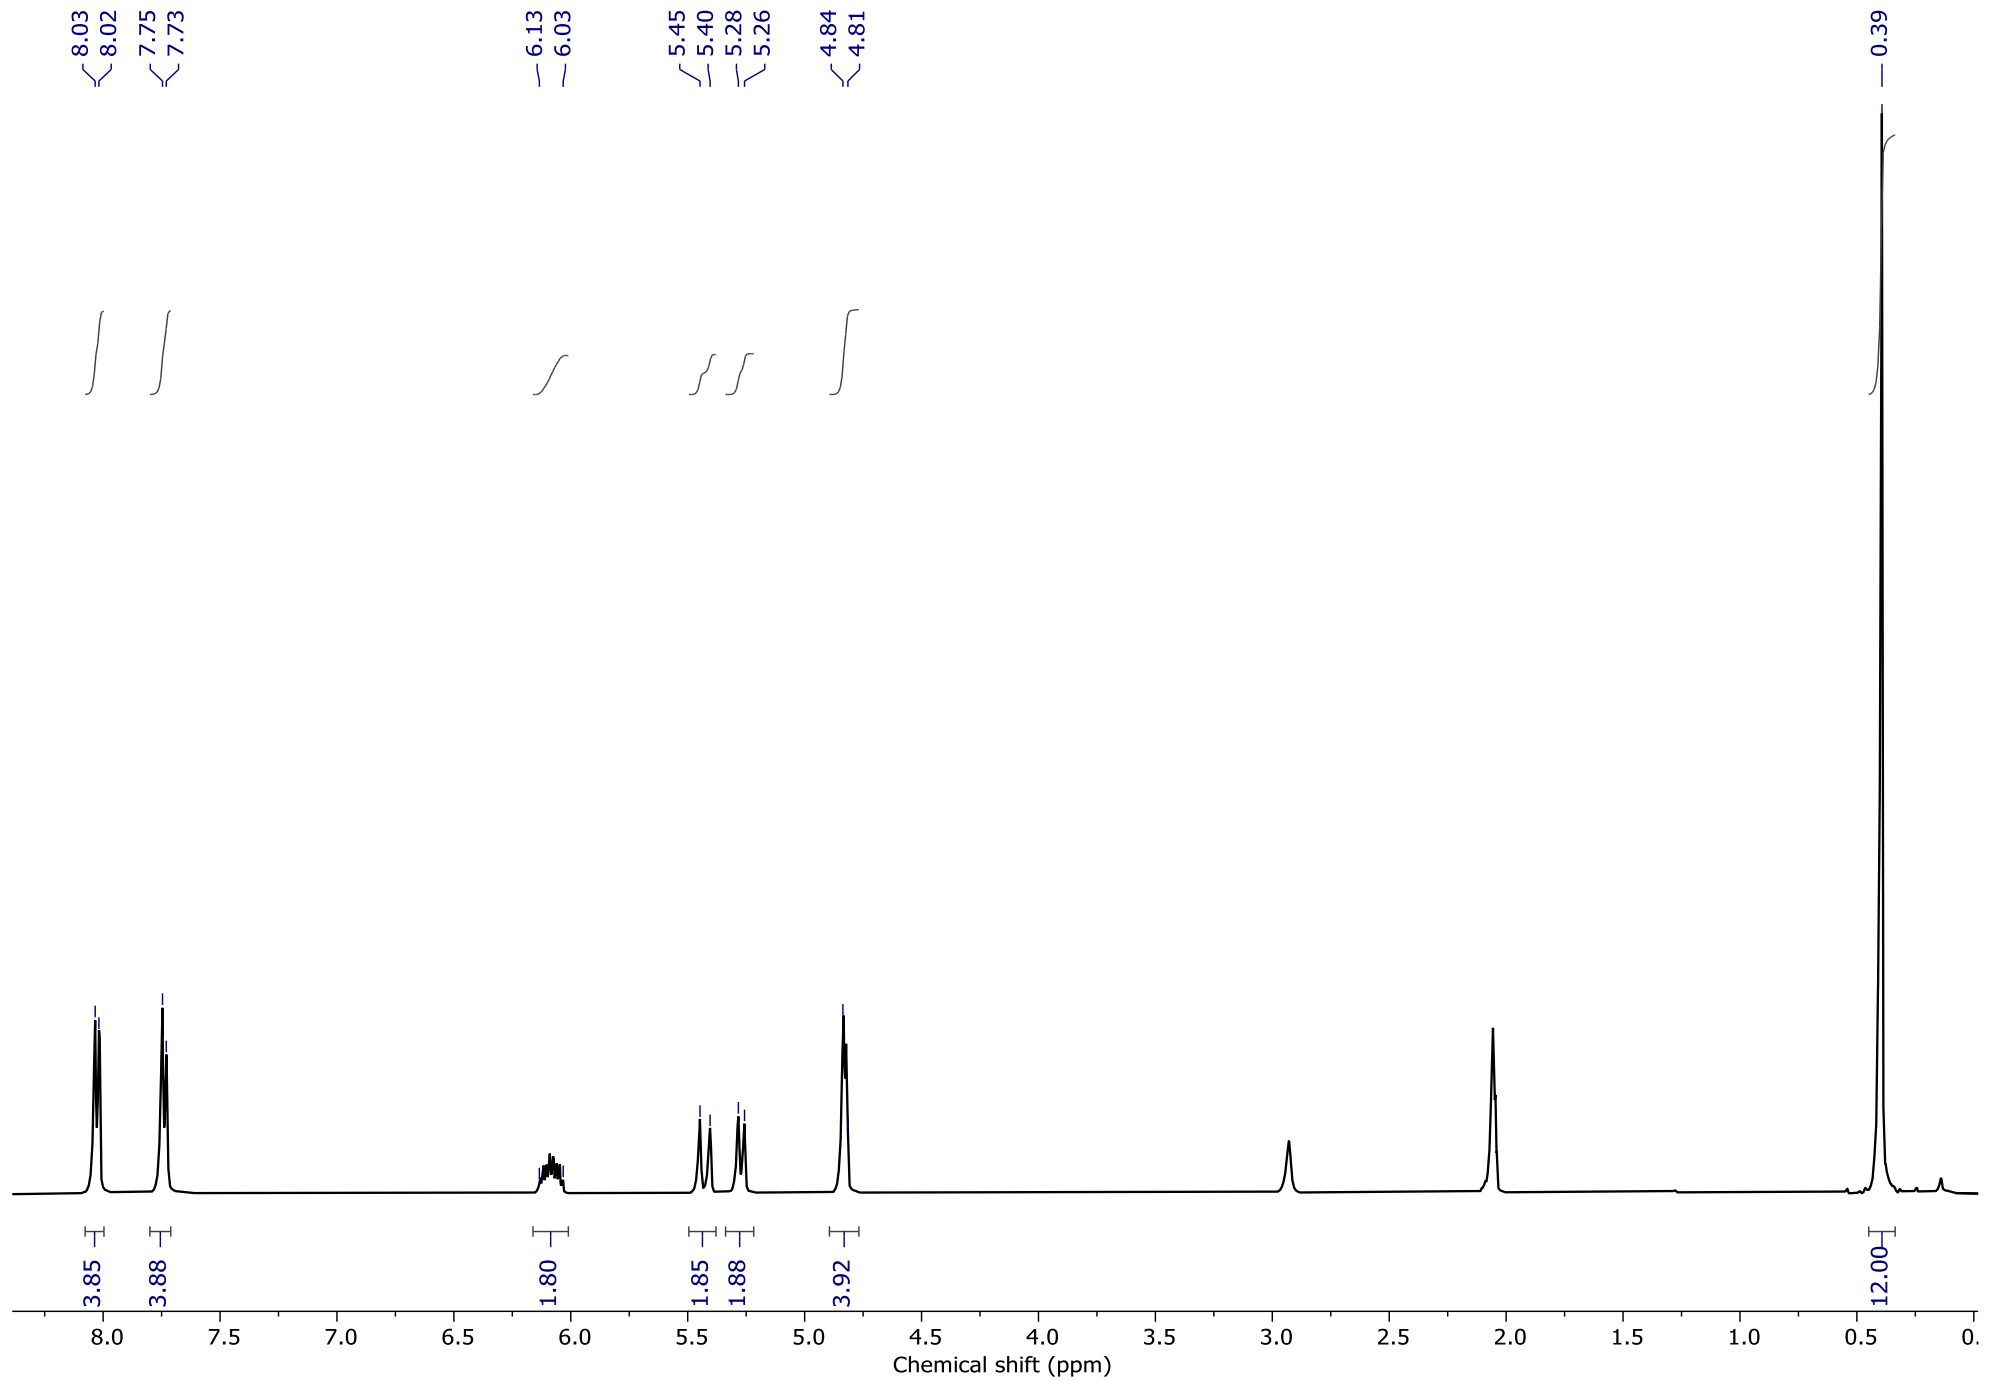

<sup>13</sup>C NMR

(100 MHz, acetone-d<sub>6</sub>)

S13

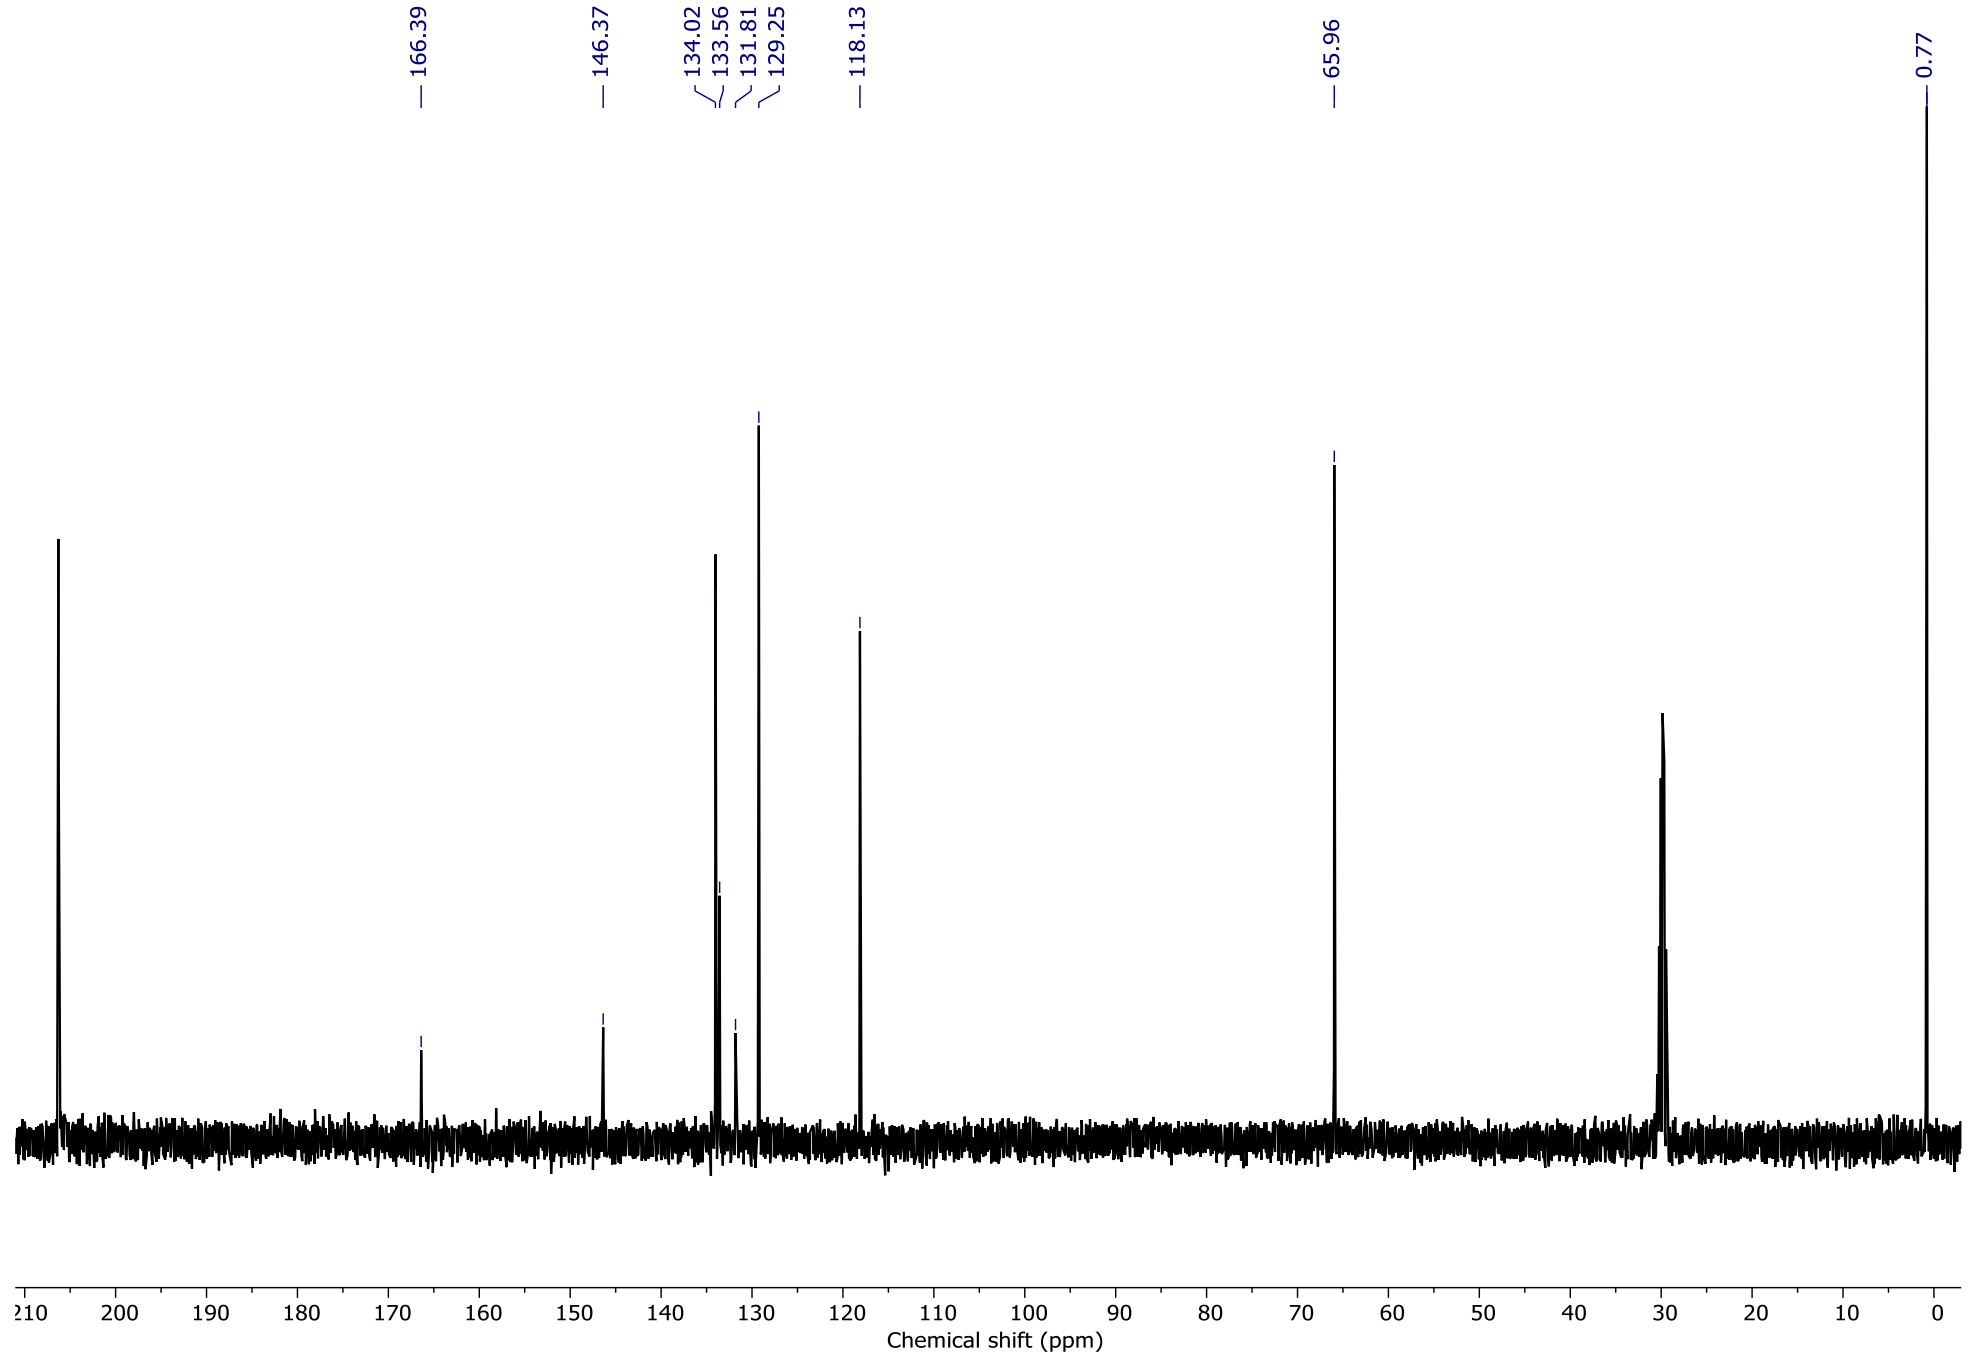

$^{29}\text{Si}$  NMR  
(80 MHz, DMSO-d<sub>6</sub>)

S14

-0.31

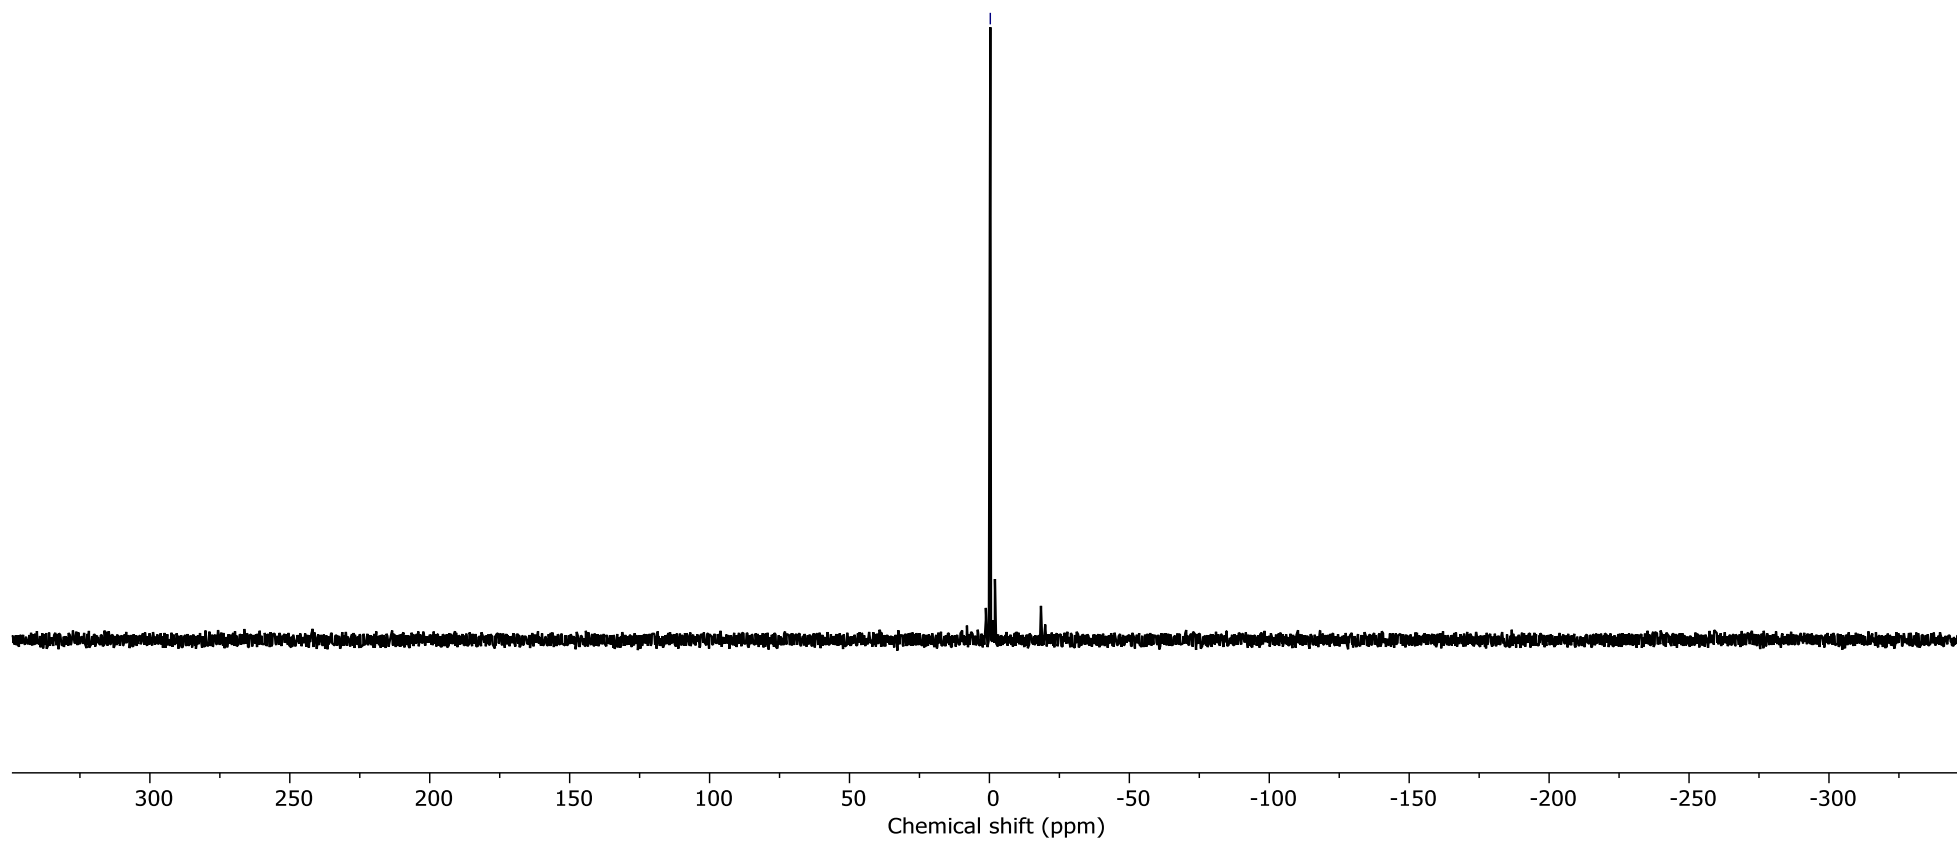

S15

$^1\text{H} - ^{13}\text{C}$  HMBC  
(400 MHz, DMSO-d<sub>6</sub>)

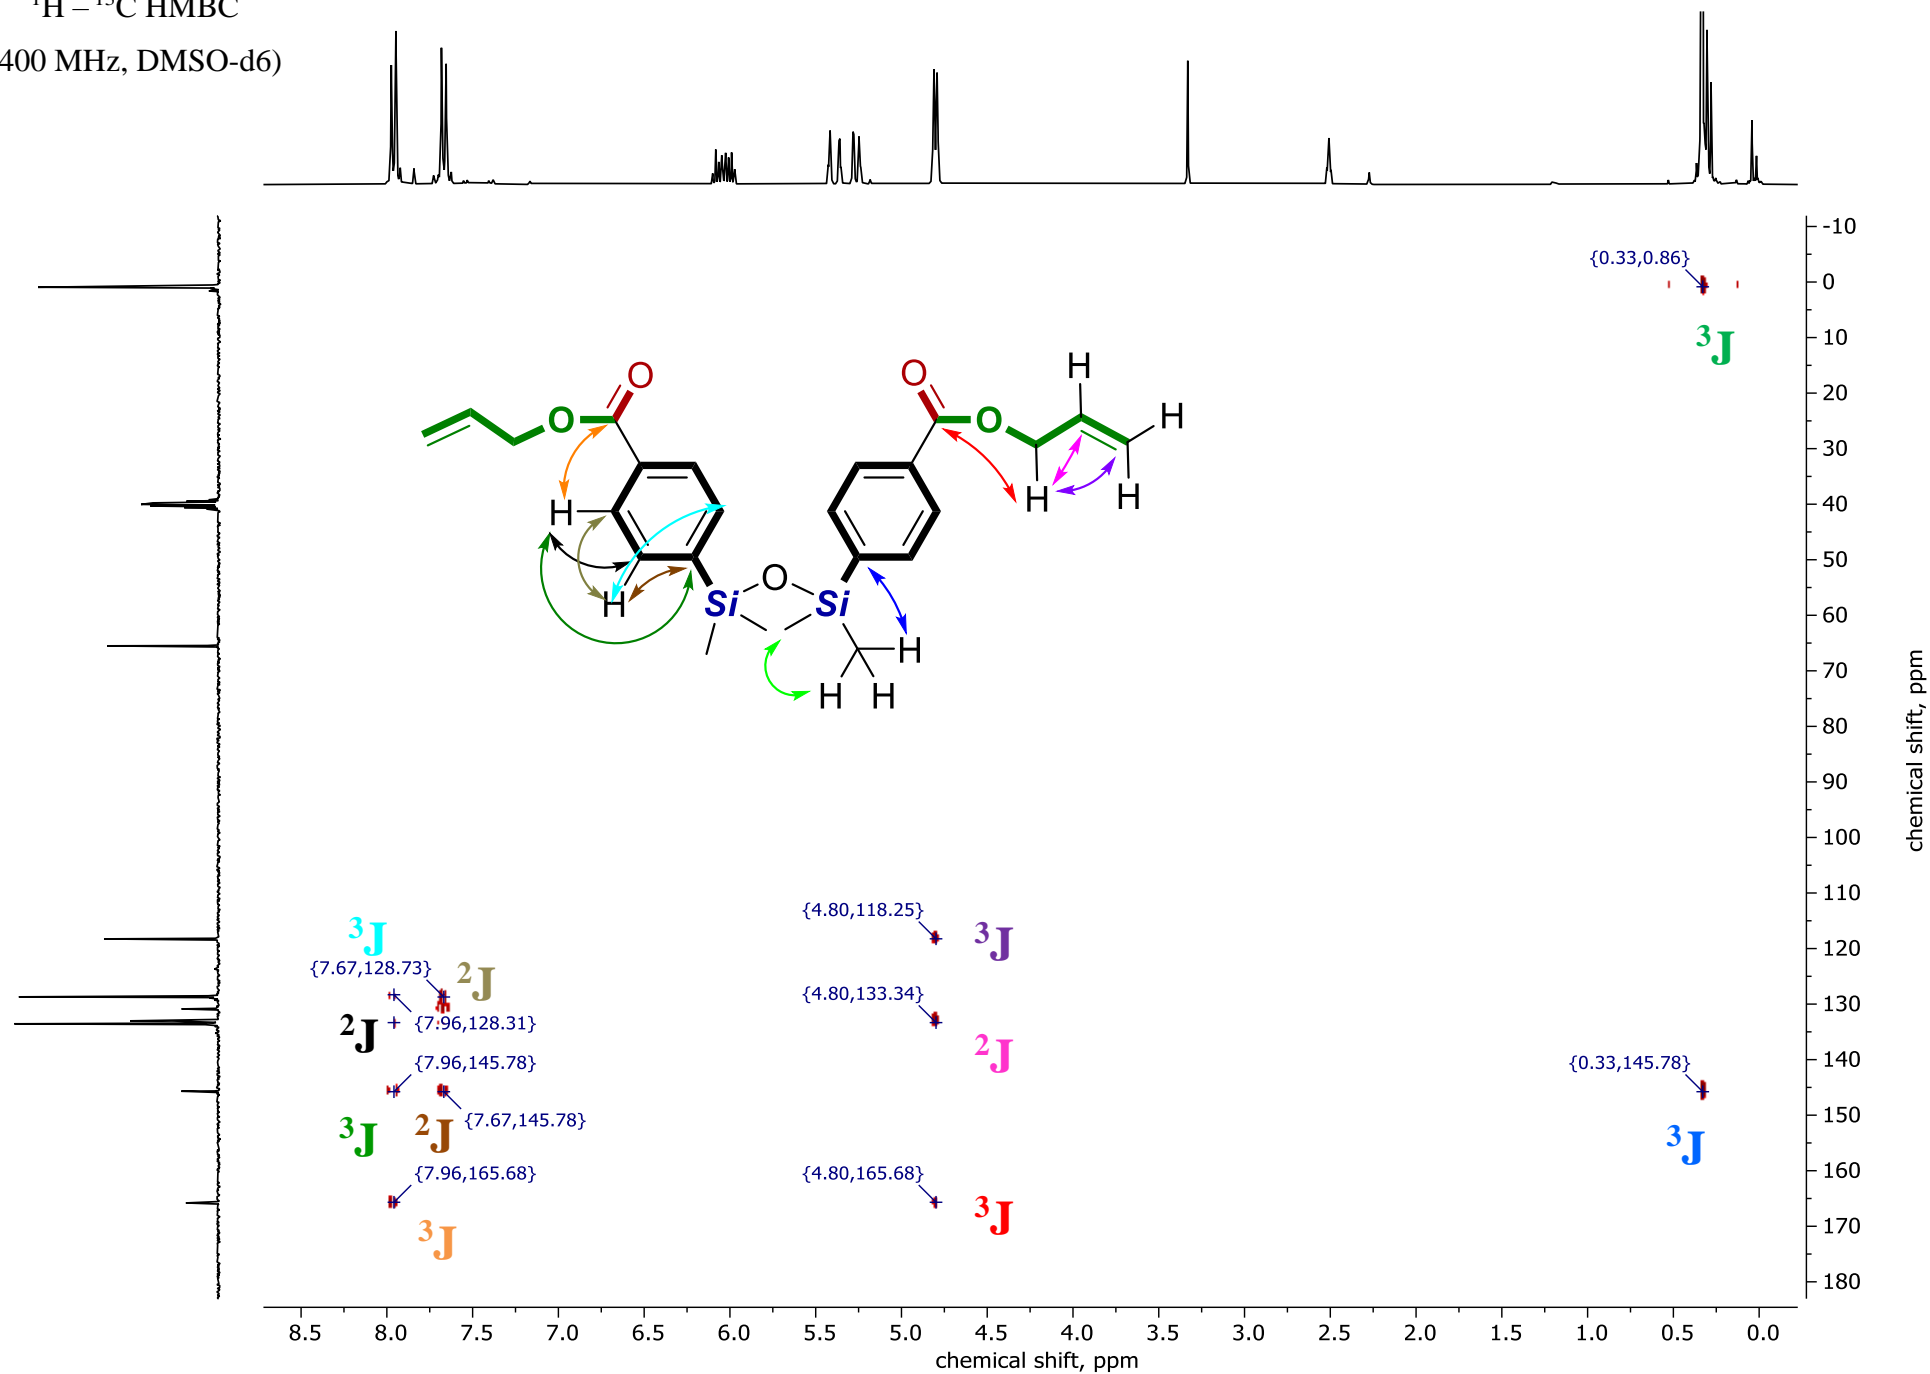

$^1\text{H} - ^{13}\text{C}$  HSQC  
(400 MHz, DMSO-d<sub>6</sub>)

S16

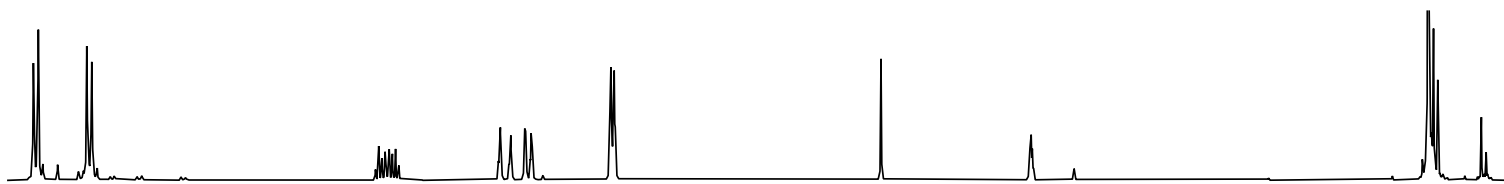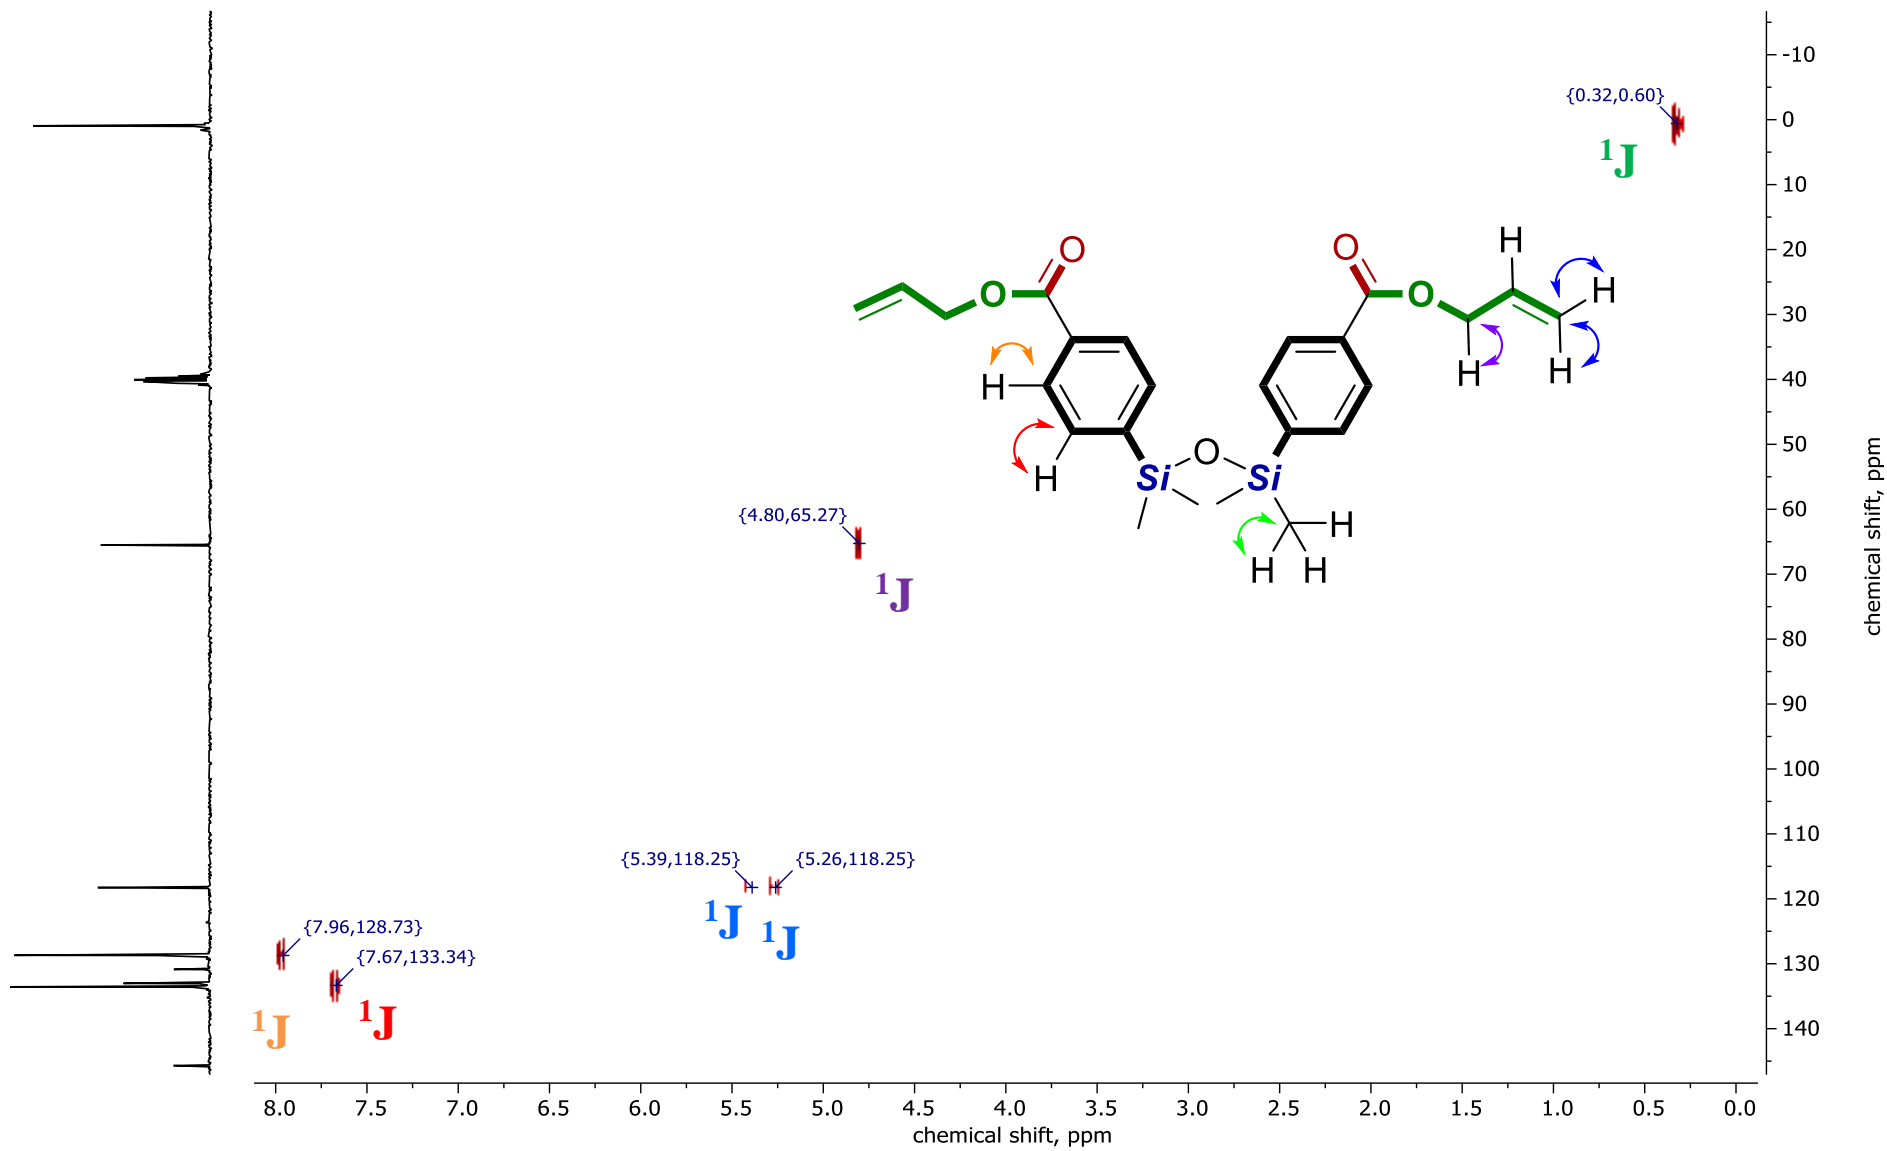



S17

$^1\text{H} - ^{29}\text{Si}$  HMBC  
(400 MHz, DMSO-d6)

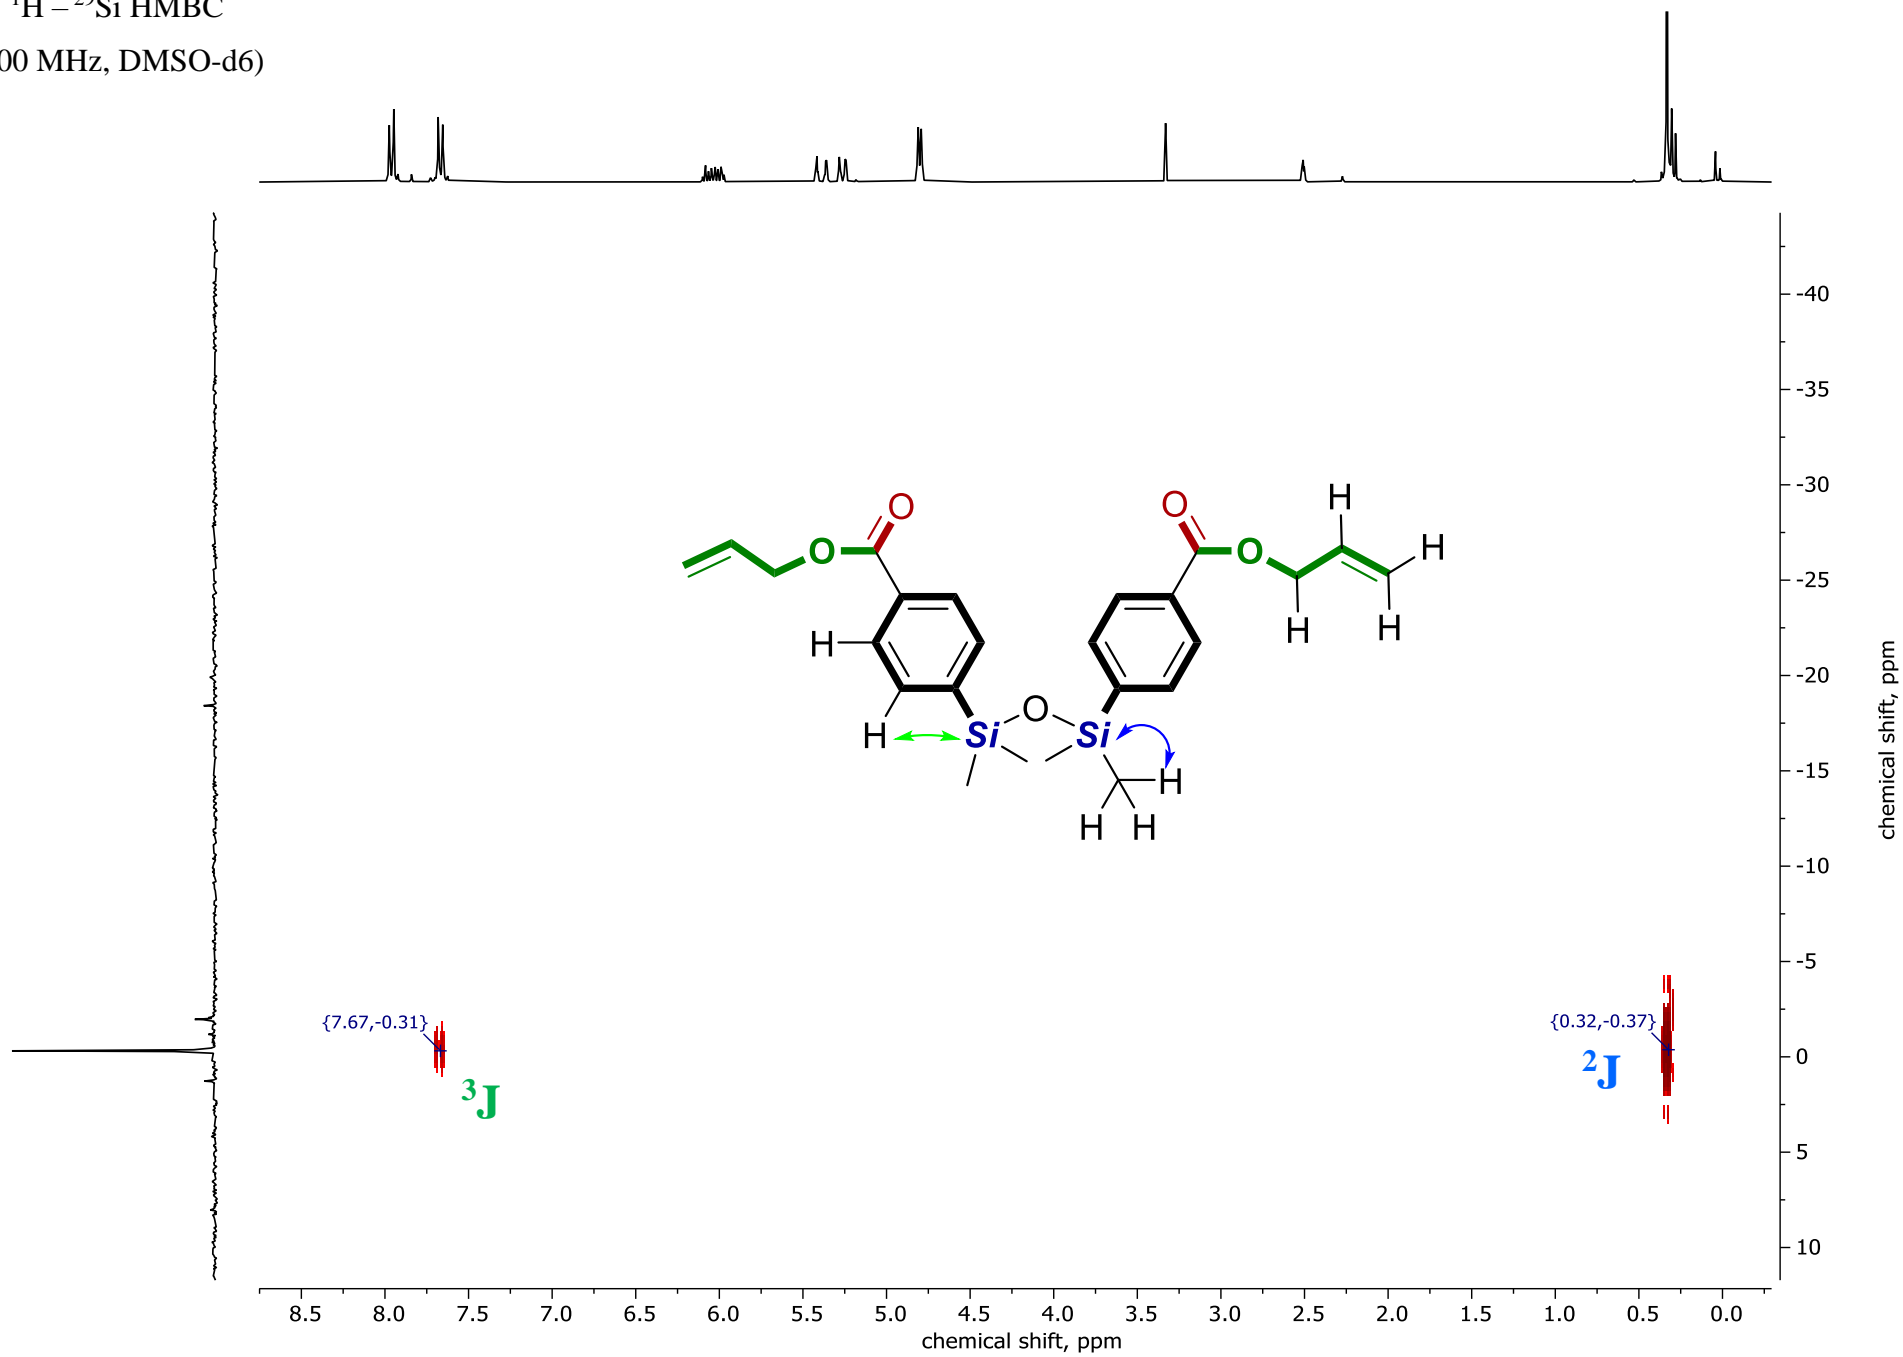

IR-spectrum

— 3429

— 3080

— 3026

— 2900

— 1942

— 1717

— 1649

— 1601

— 1557

— 1498

— 1455

— 1361

— 1313

— 1260

— 1186

— 1128

— 663

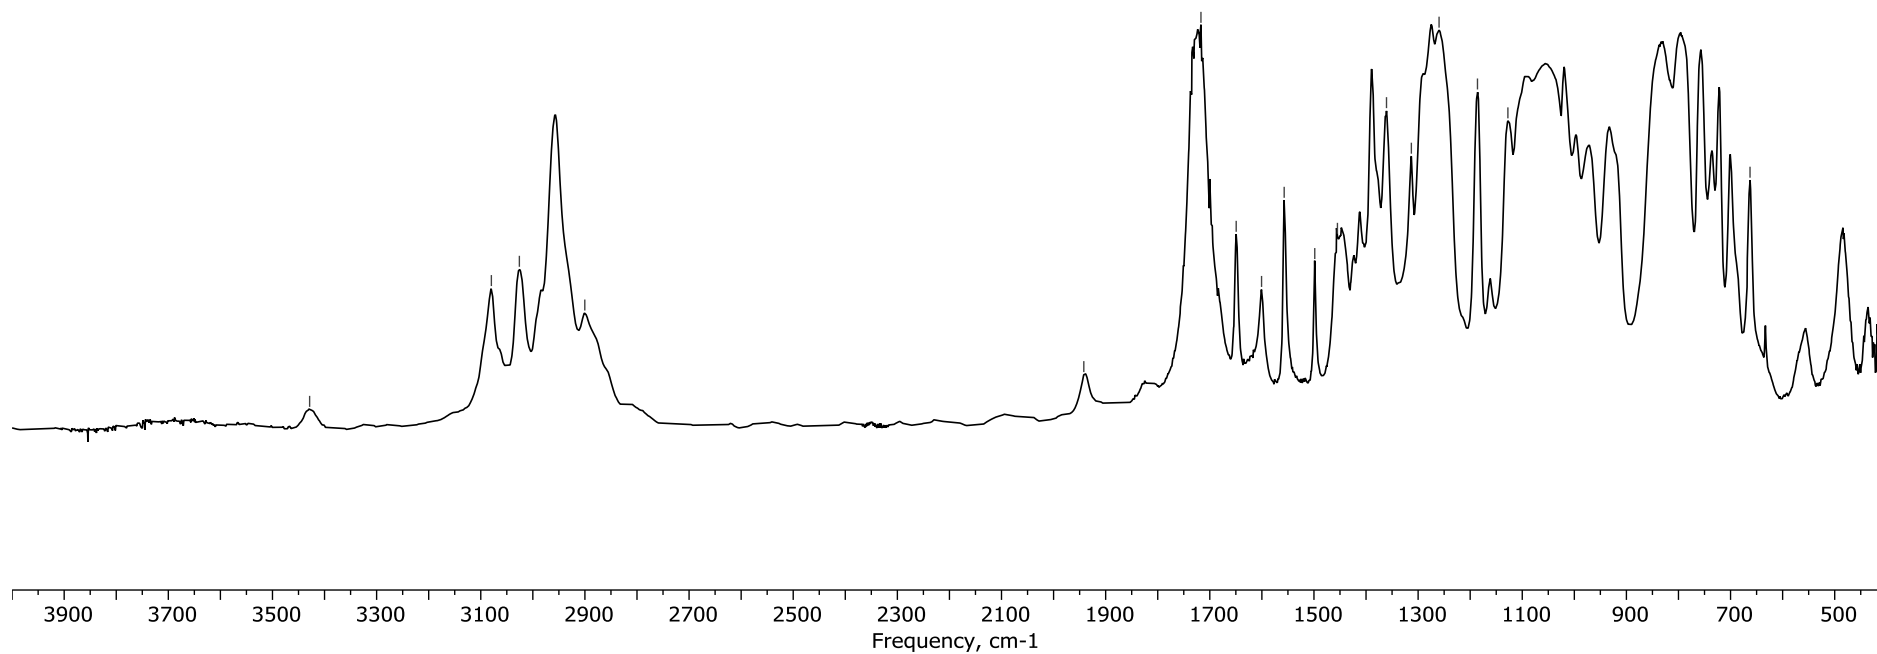

HRMS (ESI)

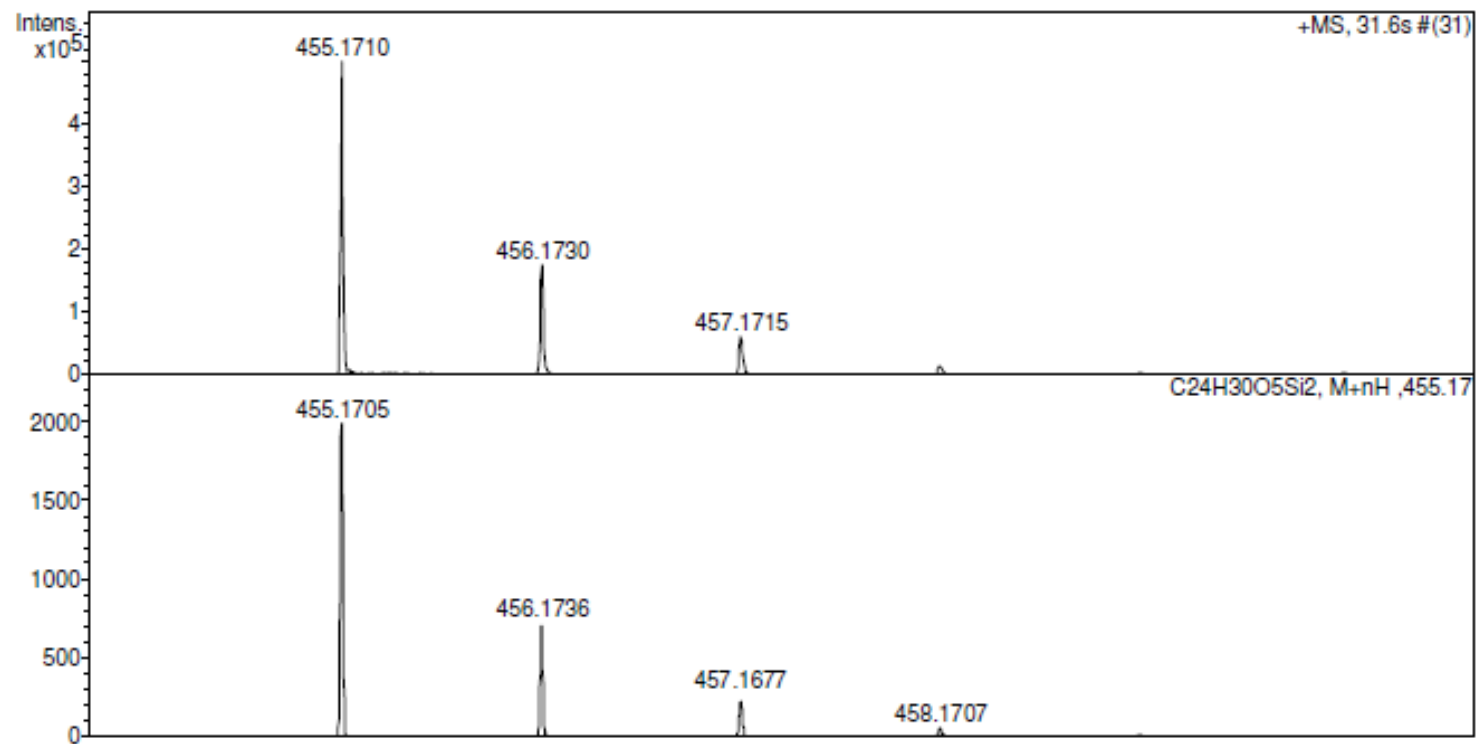

S20

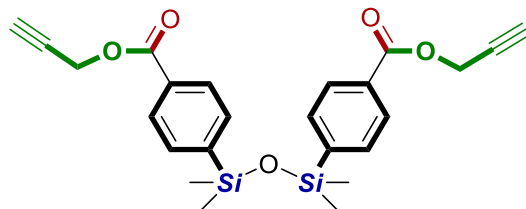

**Characterisation data for di(prop-2-yn-1-yl) 4,4'-(1,1,3,3-tetramethyldisiloxane-1,3-diyl)dibenzoate:**

$^1\text{H}$  NMR (400 MHz, DMSO- $d_6$ ):  $\delta = 7.95$  (d,  $^3J=11$  Hz, 4H),  $\delta = 7.69$  (d,  $^3J=11$  Hz, 4H),  $\delta = 4.96$  (d,  $^3J=3$ , 4H),  $\delta = 3.59$  (m, 1H),  $\delta = 0.33$  (s, 12H).  $^{13}\text{C}$  NMR (100 MHz, DMSO- $d_6$ ):  $\delta = 165.46$ , 146.07, 133.66, 130.25, 128.78, 78.77, 78.39, 52.96, 0.95.  $^{29}\text{Si}$  NMR (80 MHz, DMSO):  $\delta = -0.21$ . HRMS (ESI)  $m/z$   $[\text{M} + \text{H}]^+$ : calcd for  $[\text{C}_{24}\text{H}_{26}\text{O}_5\text{Si}_2 + \text{H}]^+$ , 451.1392; found, 451.1391;  $[\text{M} + \text{K}]^+$ : calcd for  $[\text{C}_{24}\text{H}_{26}\text{O}_5\text{Si}_2 + \text{K}]^+$ , 489.0950; found, 489.0953;  $[\text{M} + \text{Na}]^+$ : calcd for  $[\text{C}_{24}\text{H}_{26}\text{O}_5\text{Si}_2 + \text{Na}]^+$ , 473.1211; found, 473.1206. IR ( $\text{cm}^{-1}$ ): 3291, 2964, 1715, 1281, 1100, 825-651.

<sup>1</sup>H NMR

(400 MHz, DMSO-d6)

S21

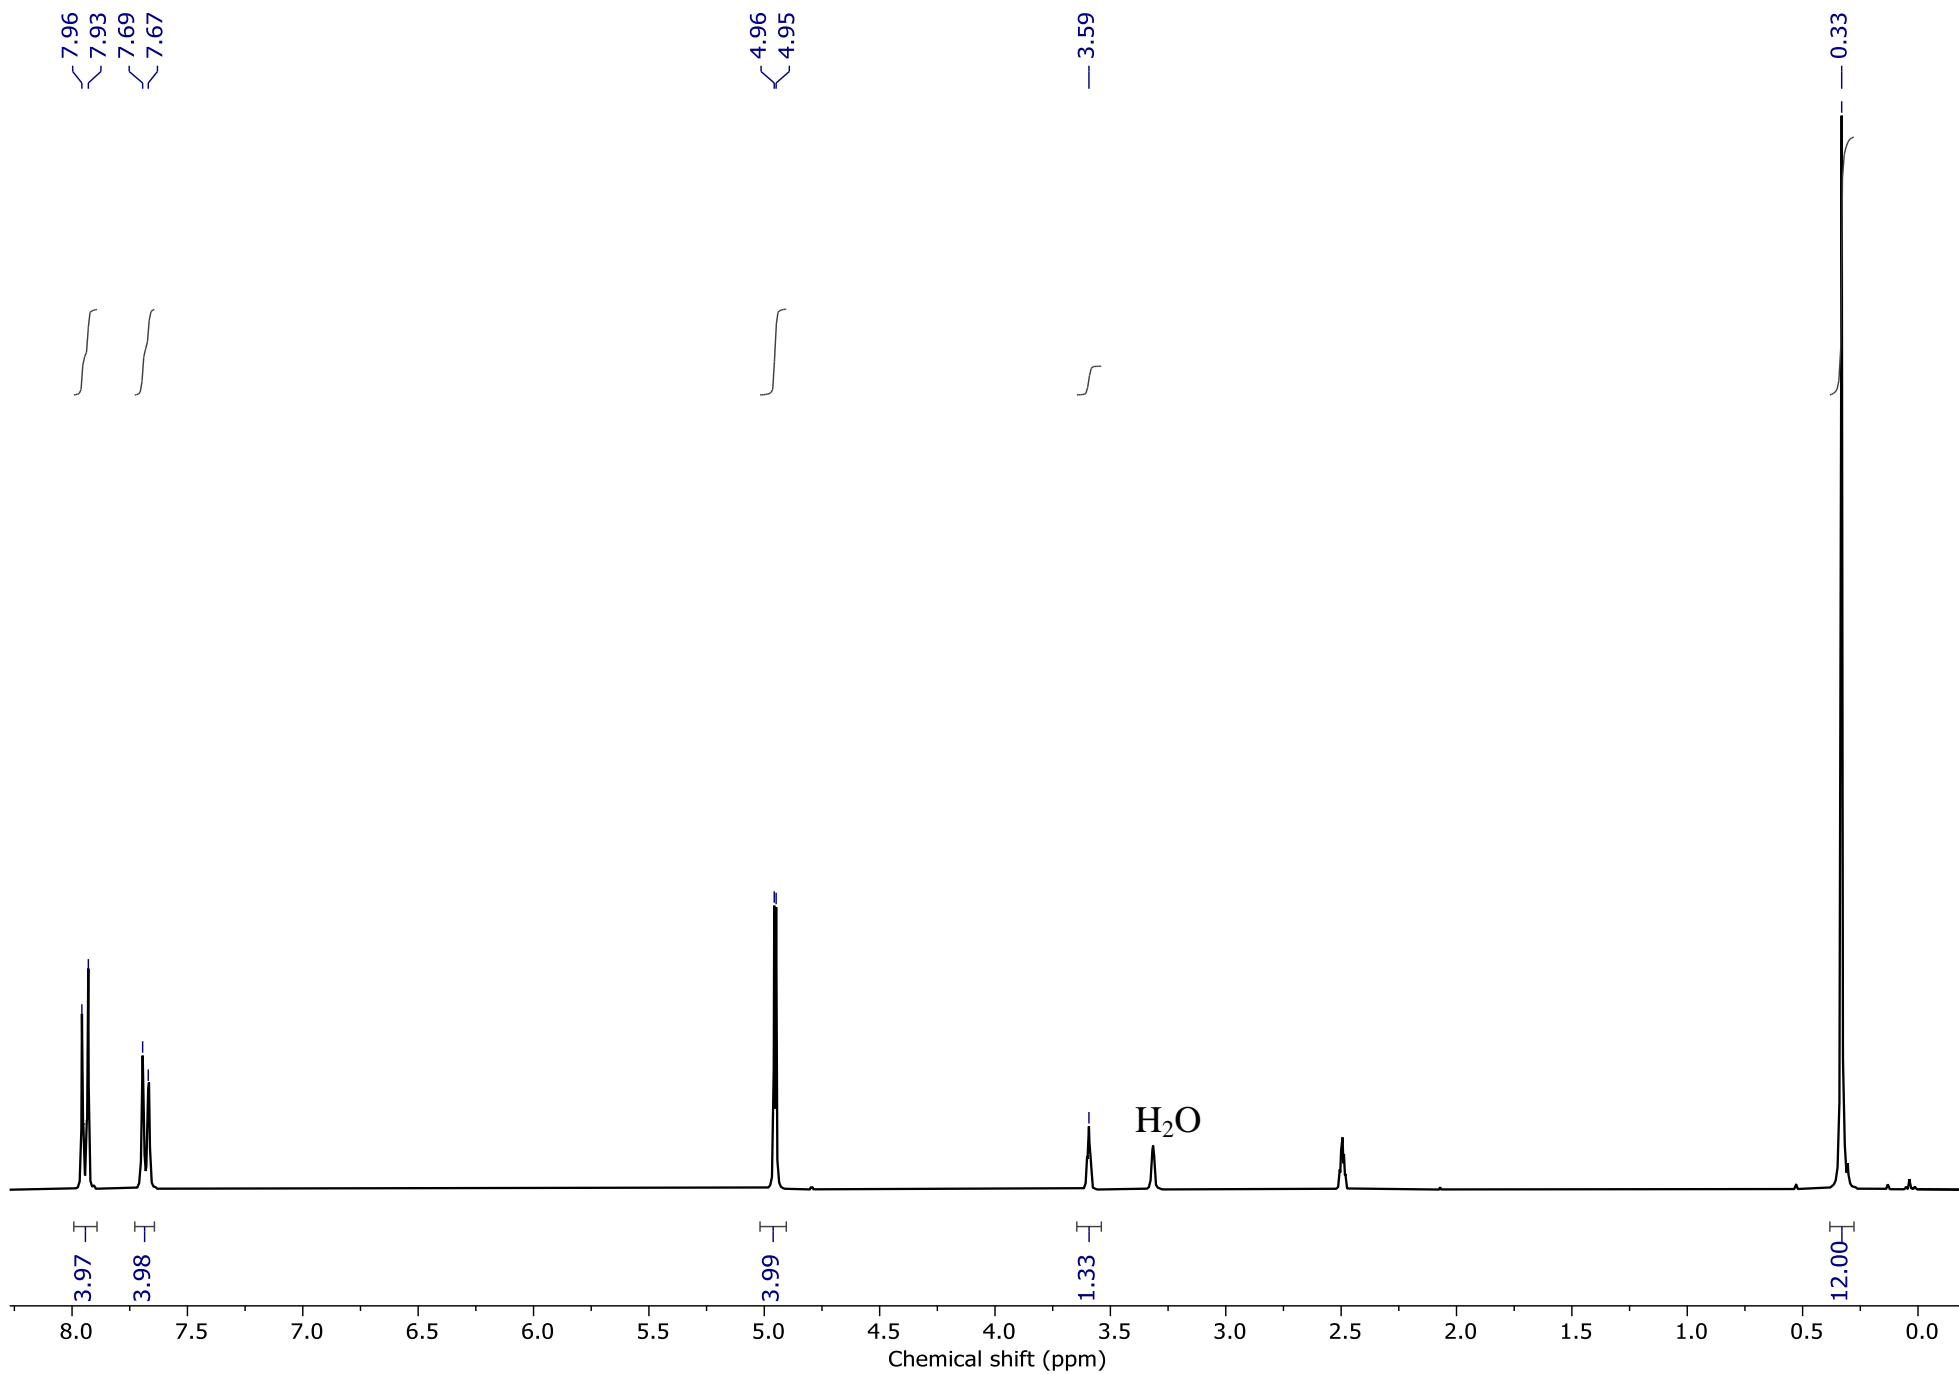

<sup>13</sup>C NMR

(100 MHz, DMSO-d6)

S22

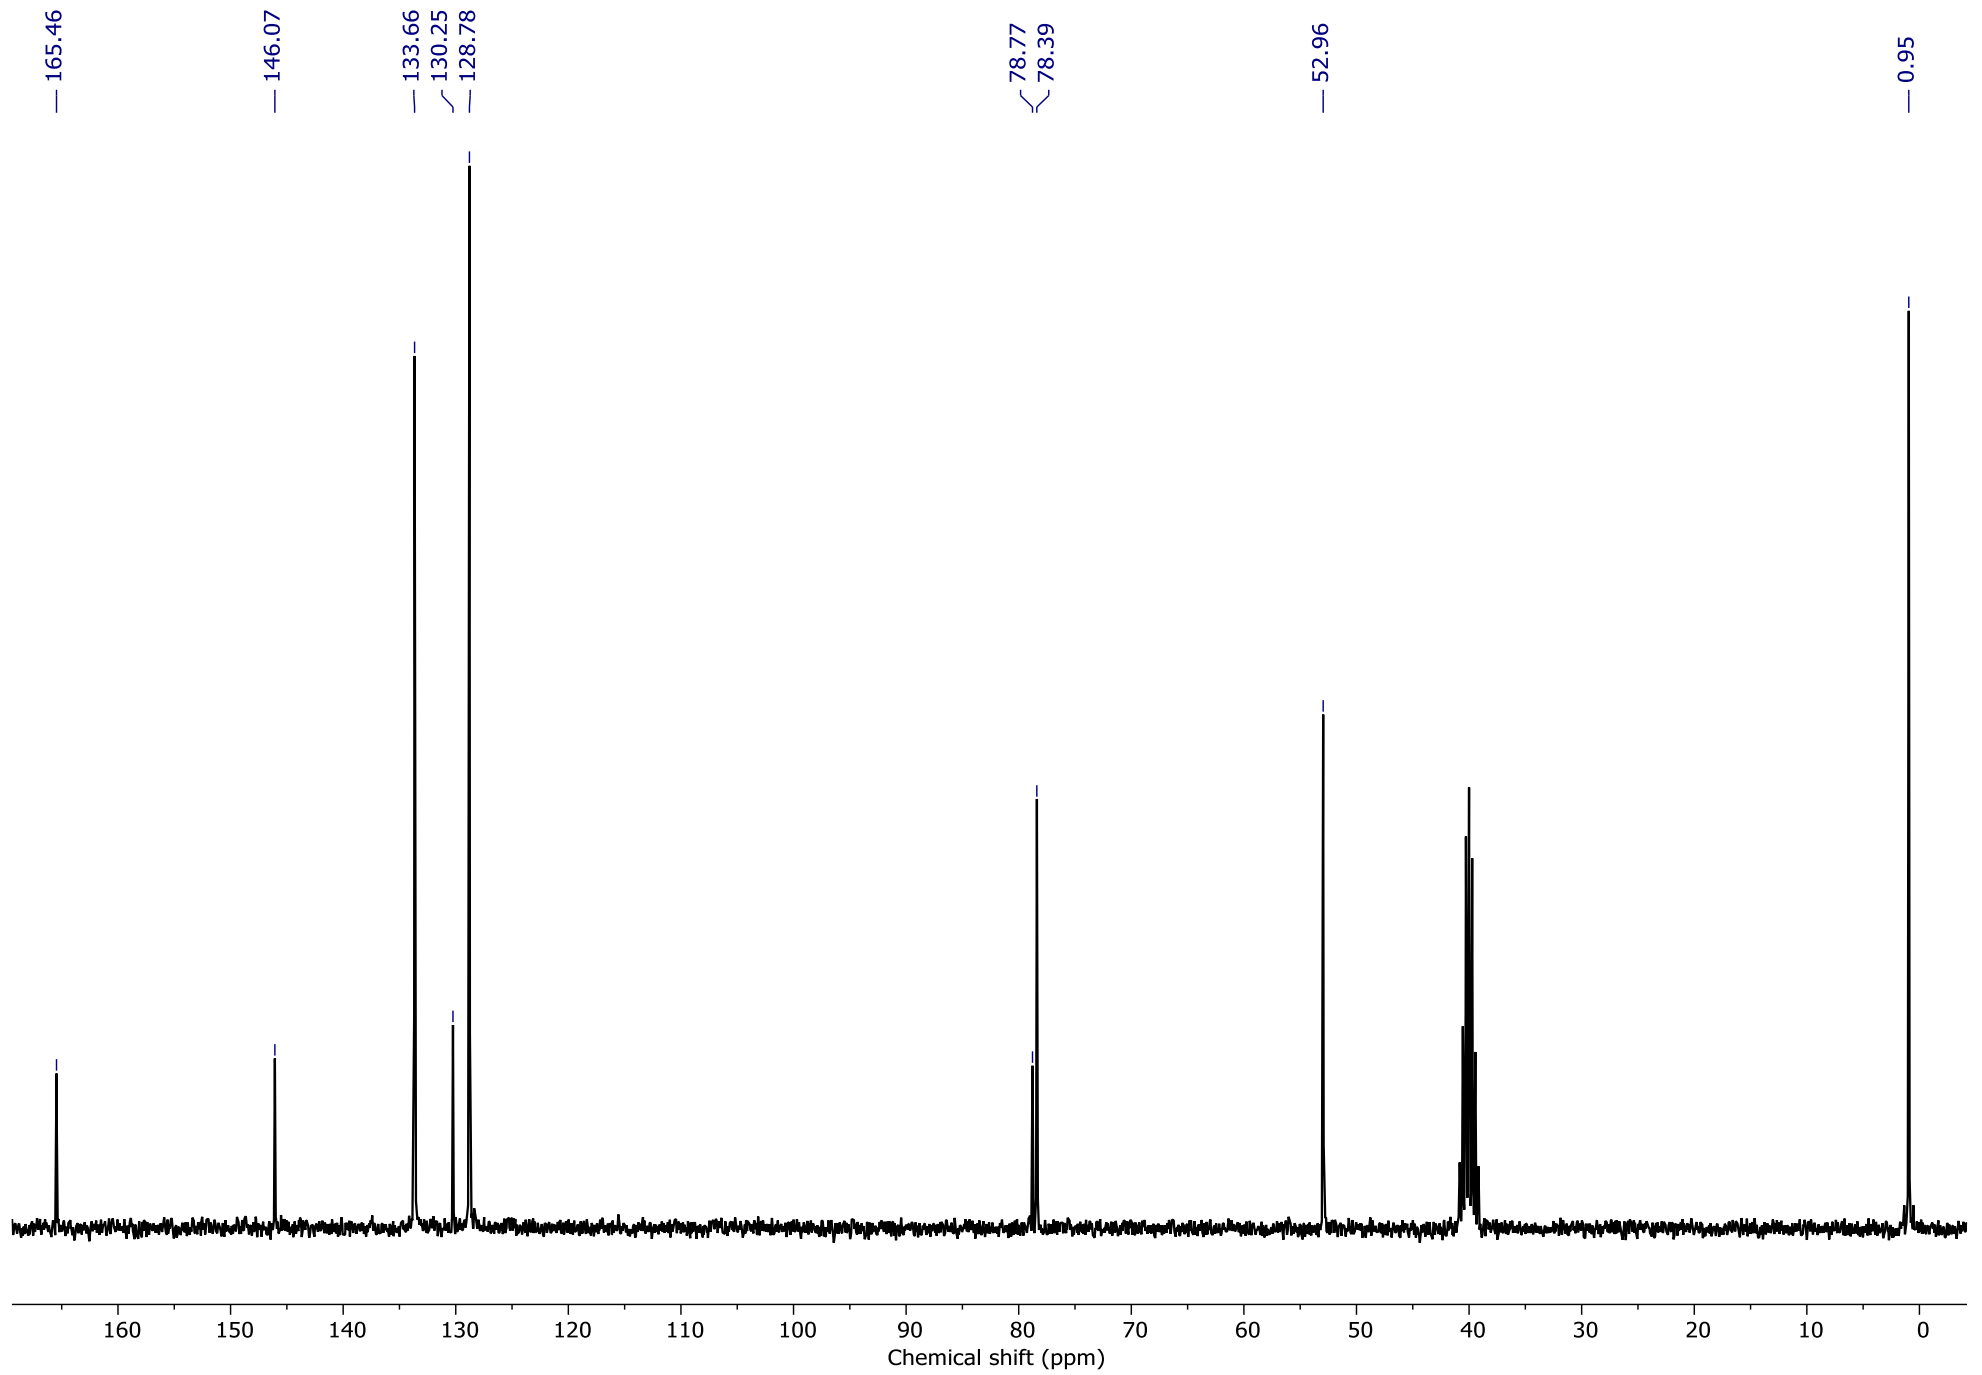

$^{29}\text{Si}$  NMR  
(80 MHz, DMSO-d<sub>6</sub>)

S23

— -0.21

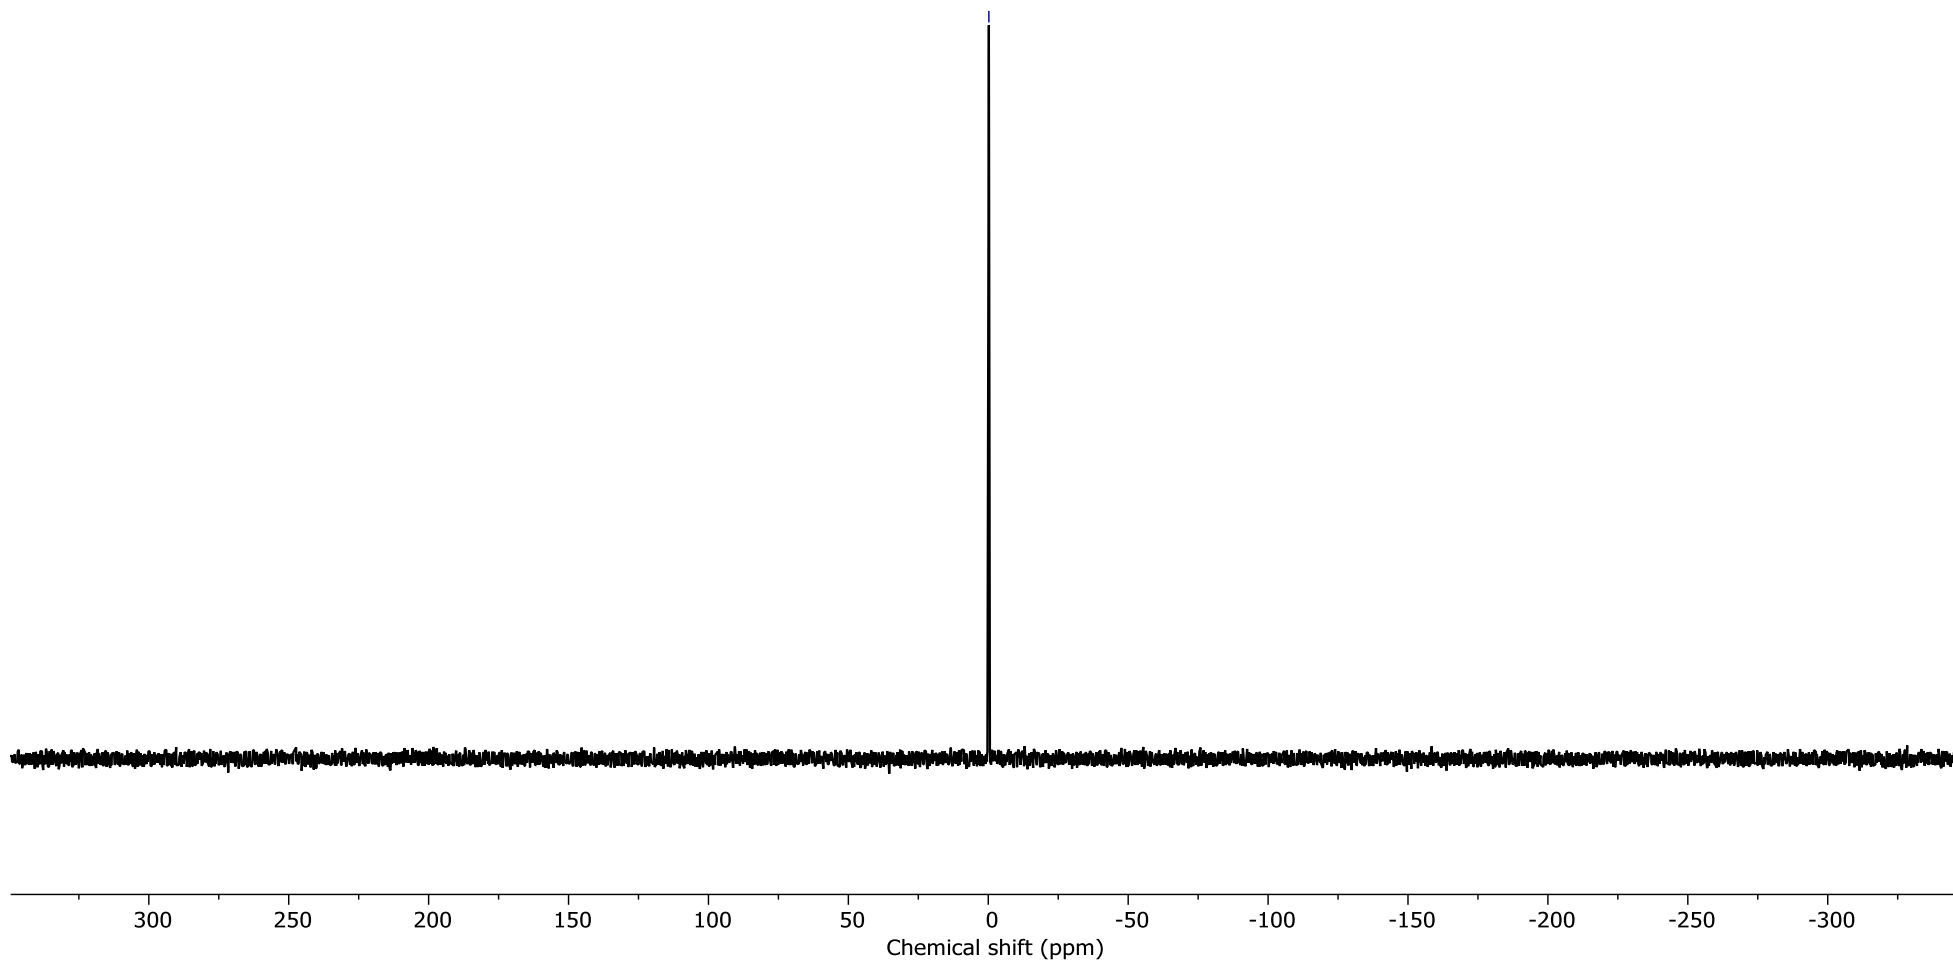

$^1\text{H} - ^{13}\text{C}$  HMBC  
(400 MHz, DMSO-d6)

S24

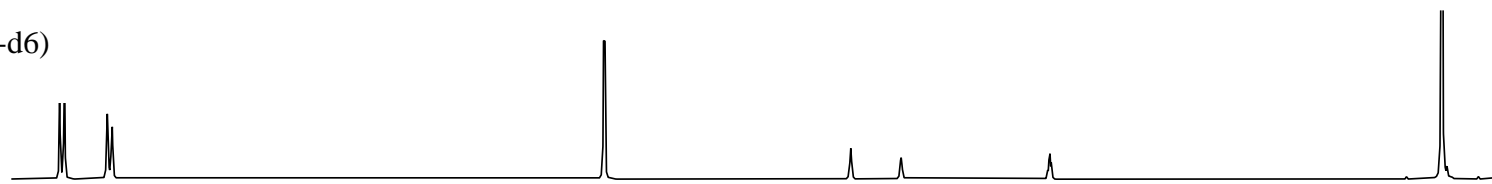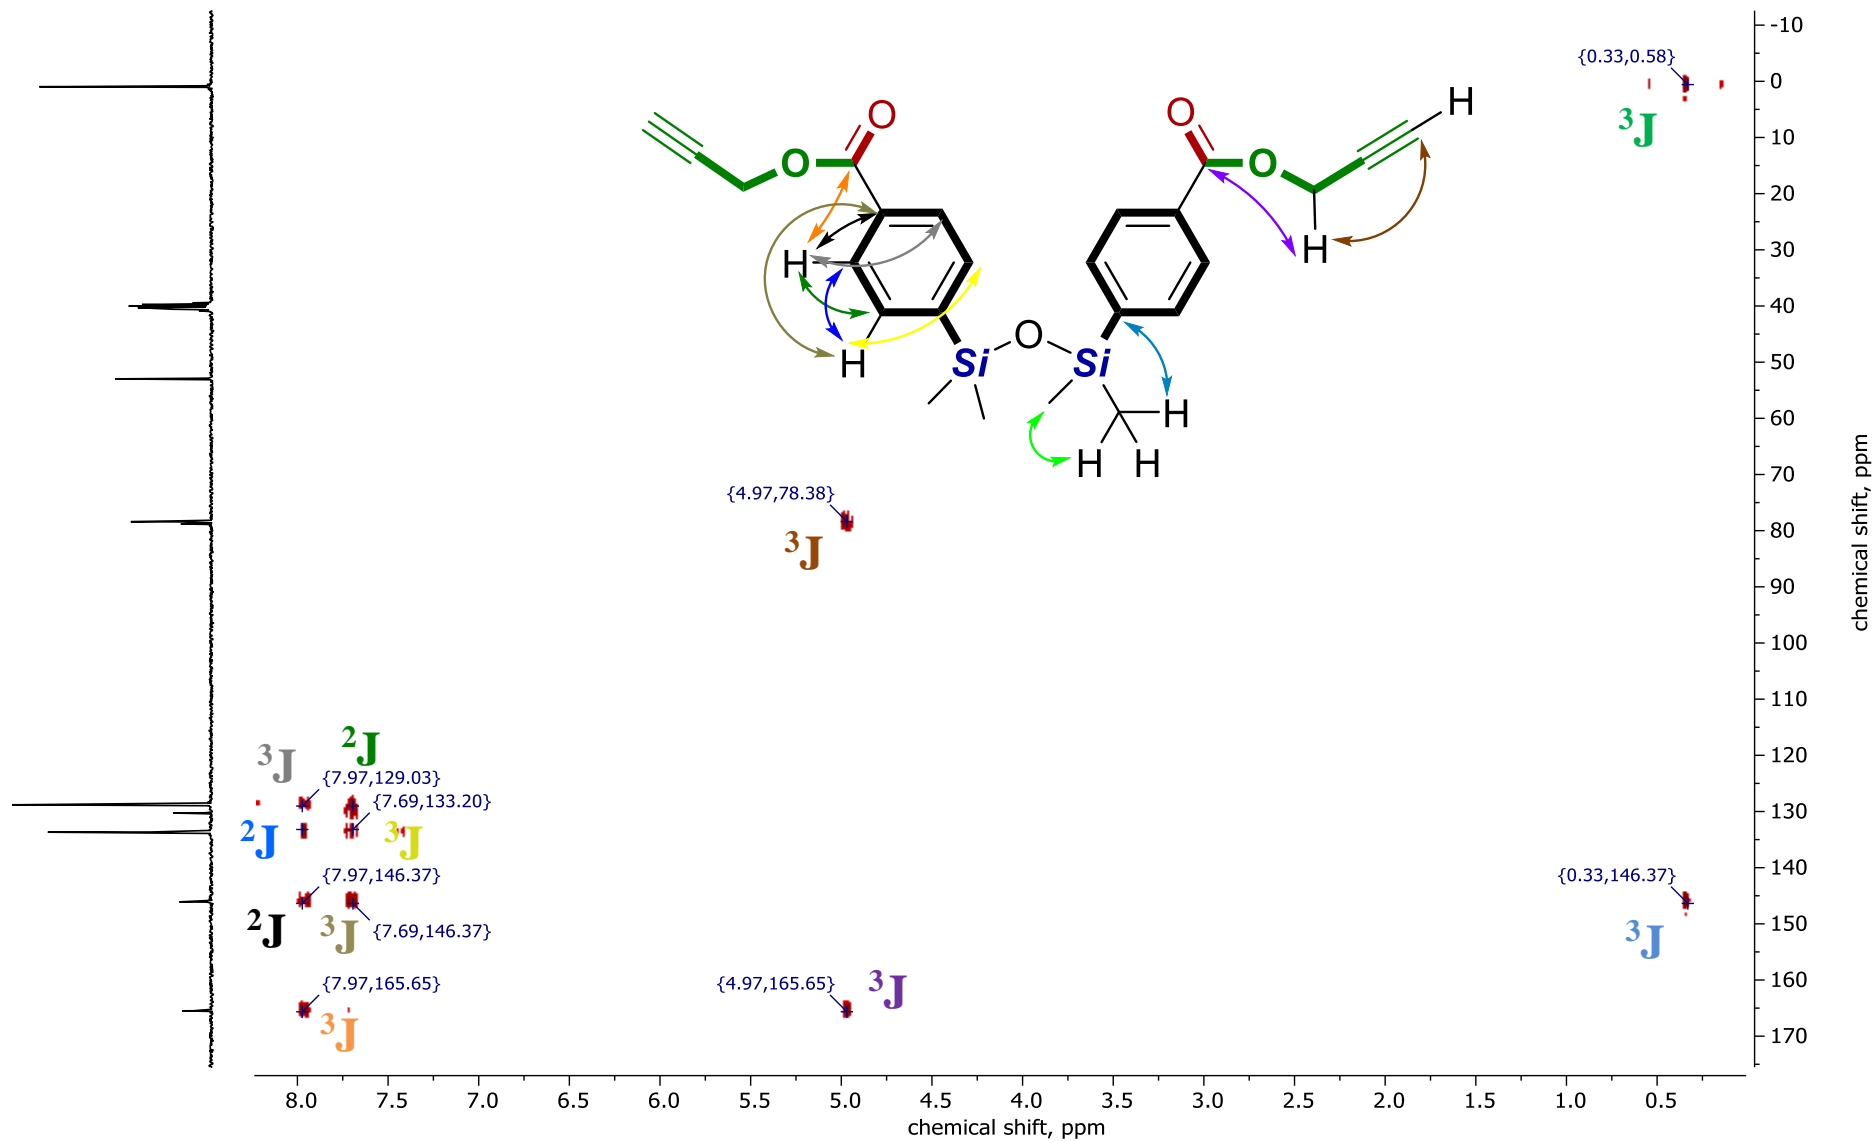



$^1\text{H} - ^{13}\text{C}$  HSQC  
(400 MHz, DMSO-d<sub>6</sub>)

S25

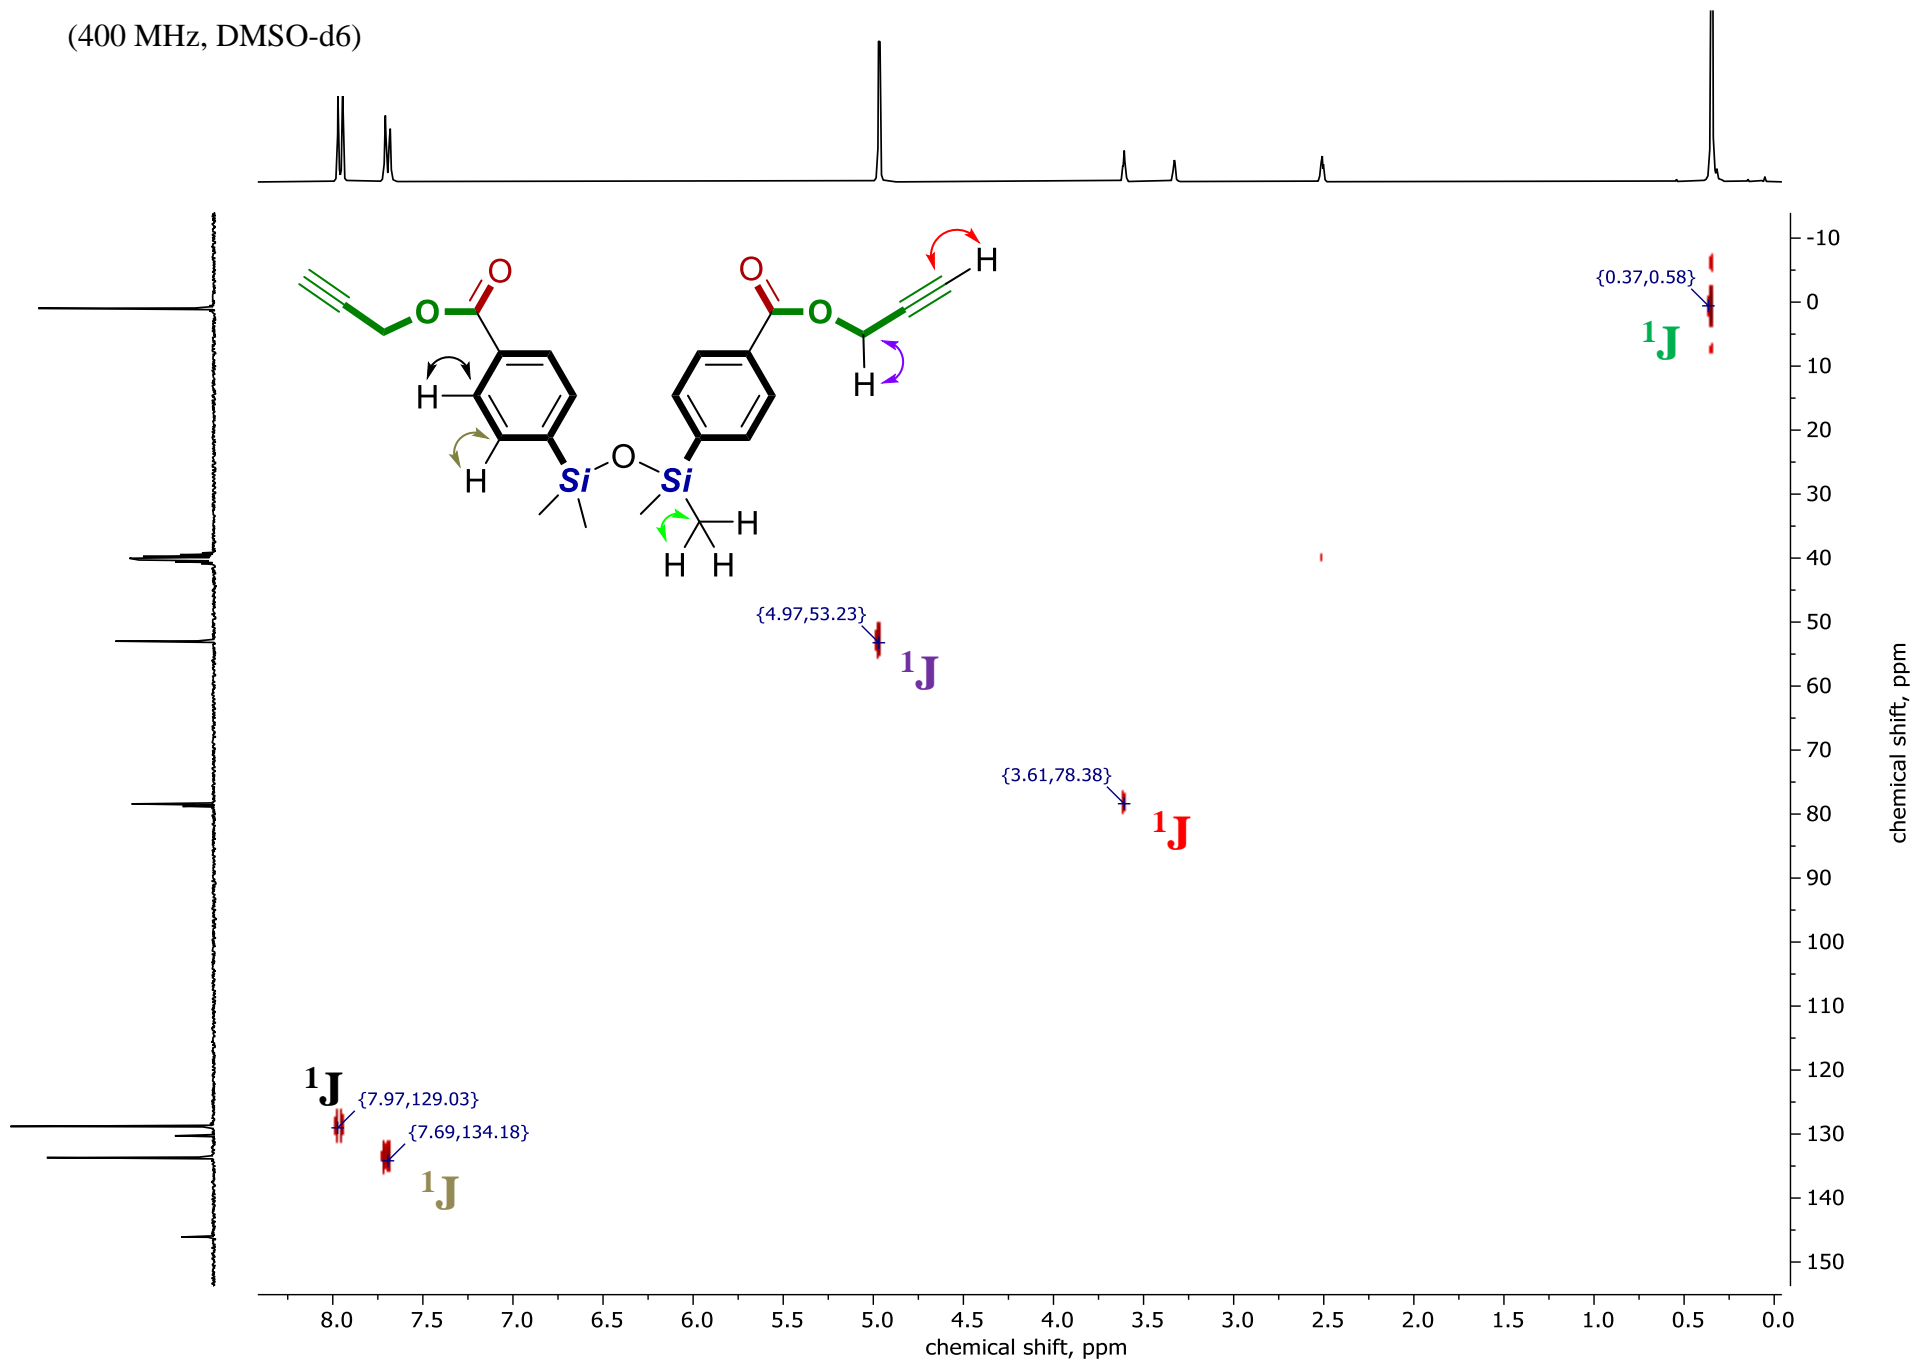

$^1\text{H} - ^{29}\text{Si}$  HMBC  
(400 MHz, DMSO-d6)

S26

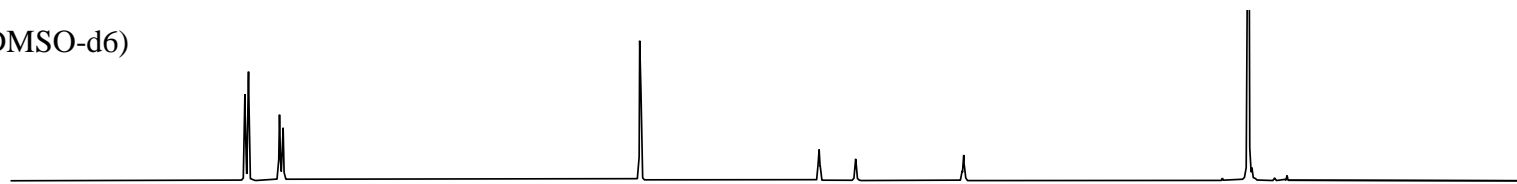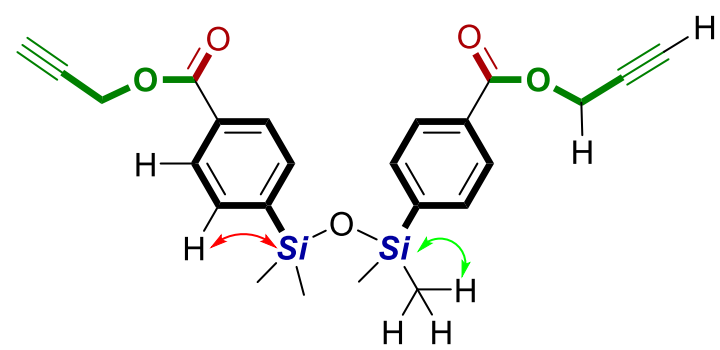

{7.69, -1.55} **3J**

{0.37, -1.95} **2J**

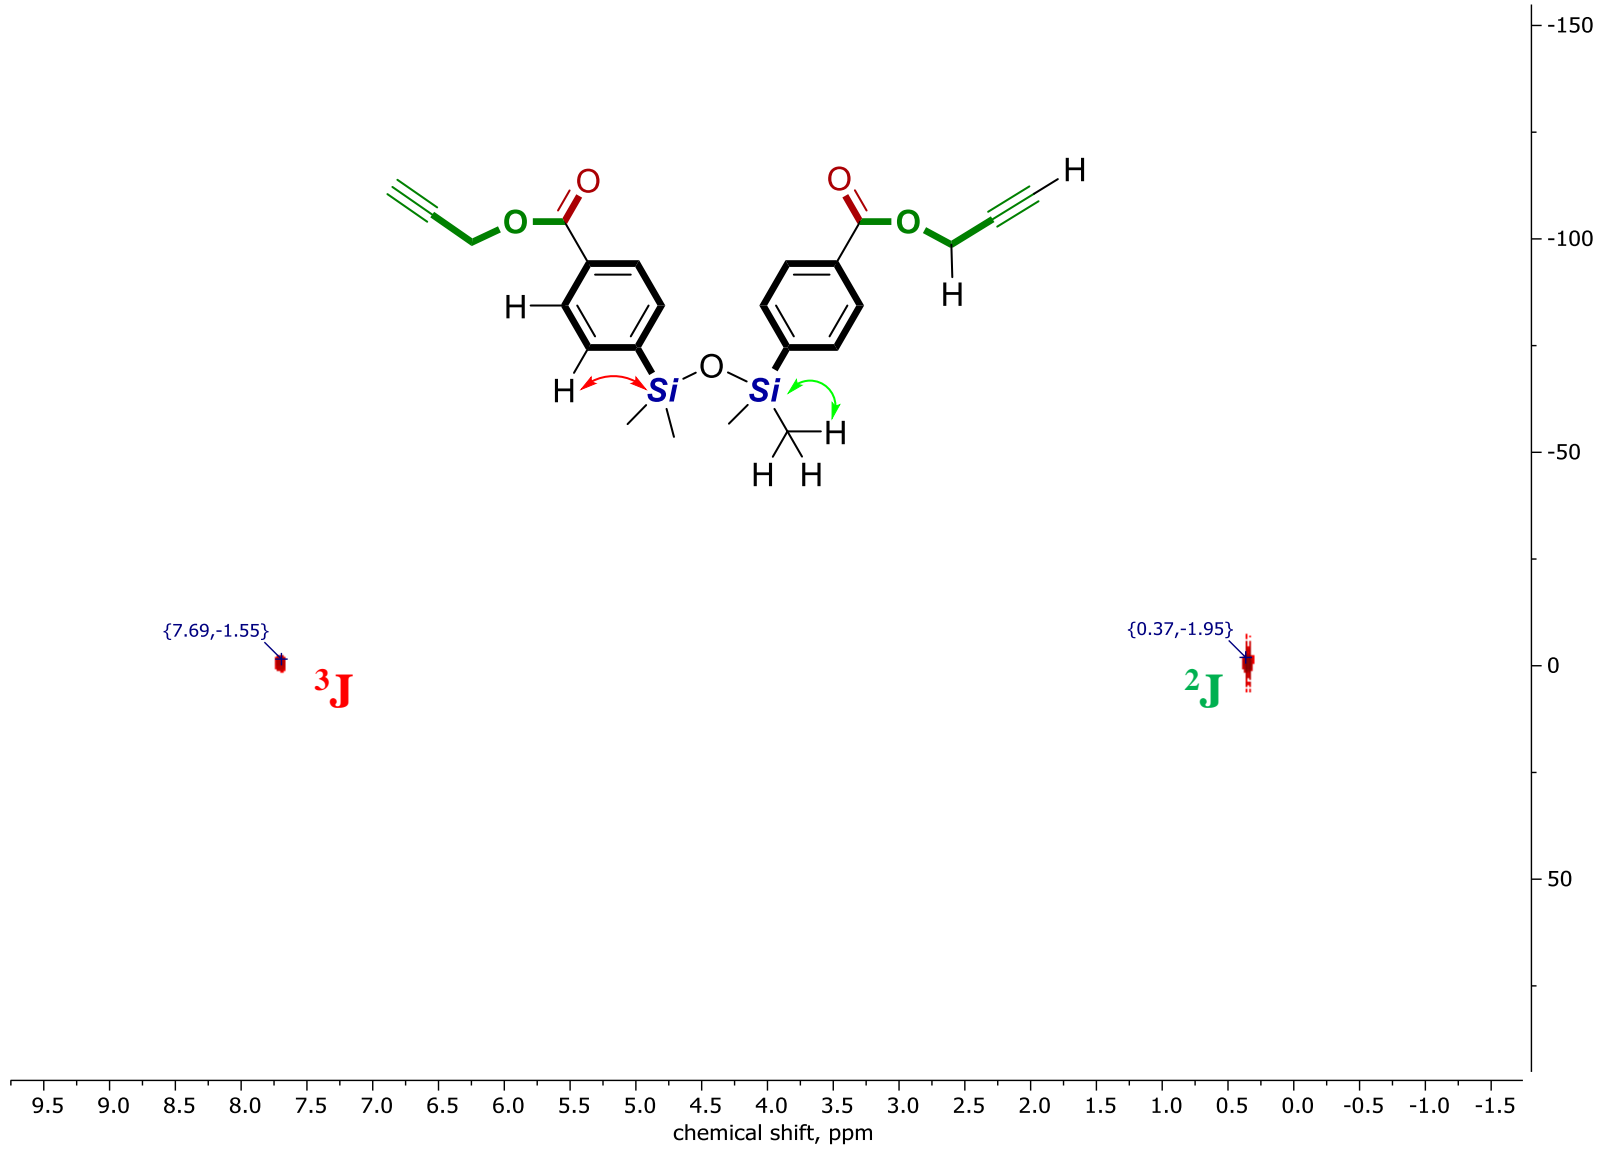

S27

IR-spectrum

— 3291

— 2964

— 1715

— 1281

— 1100

— 825

— 651

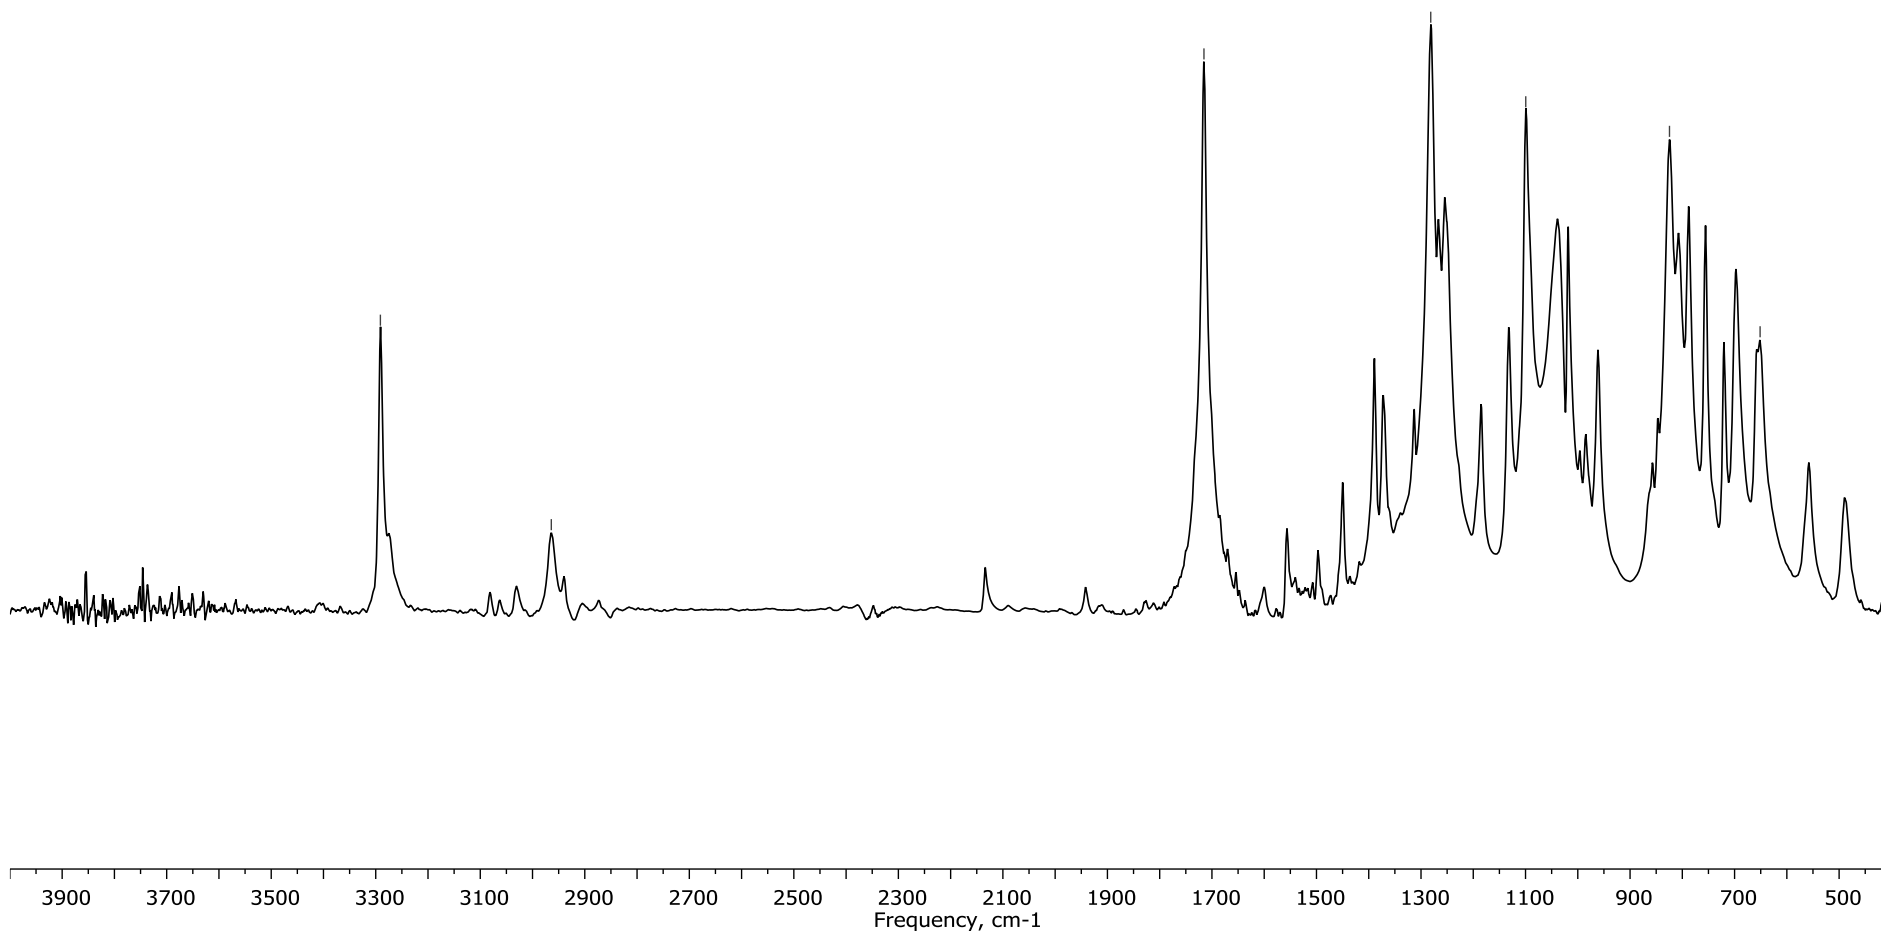

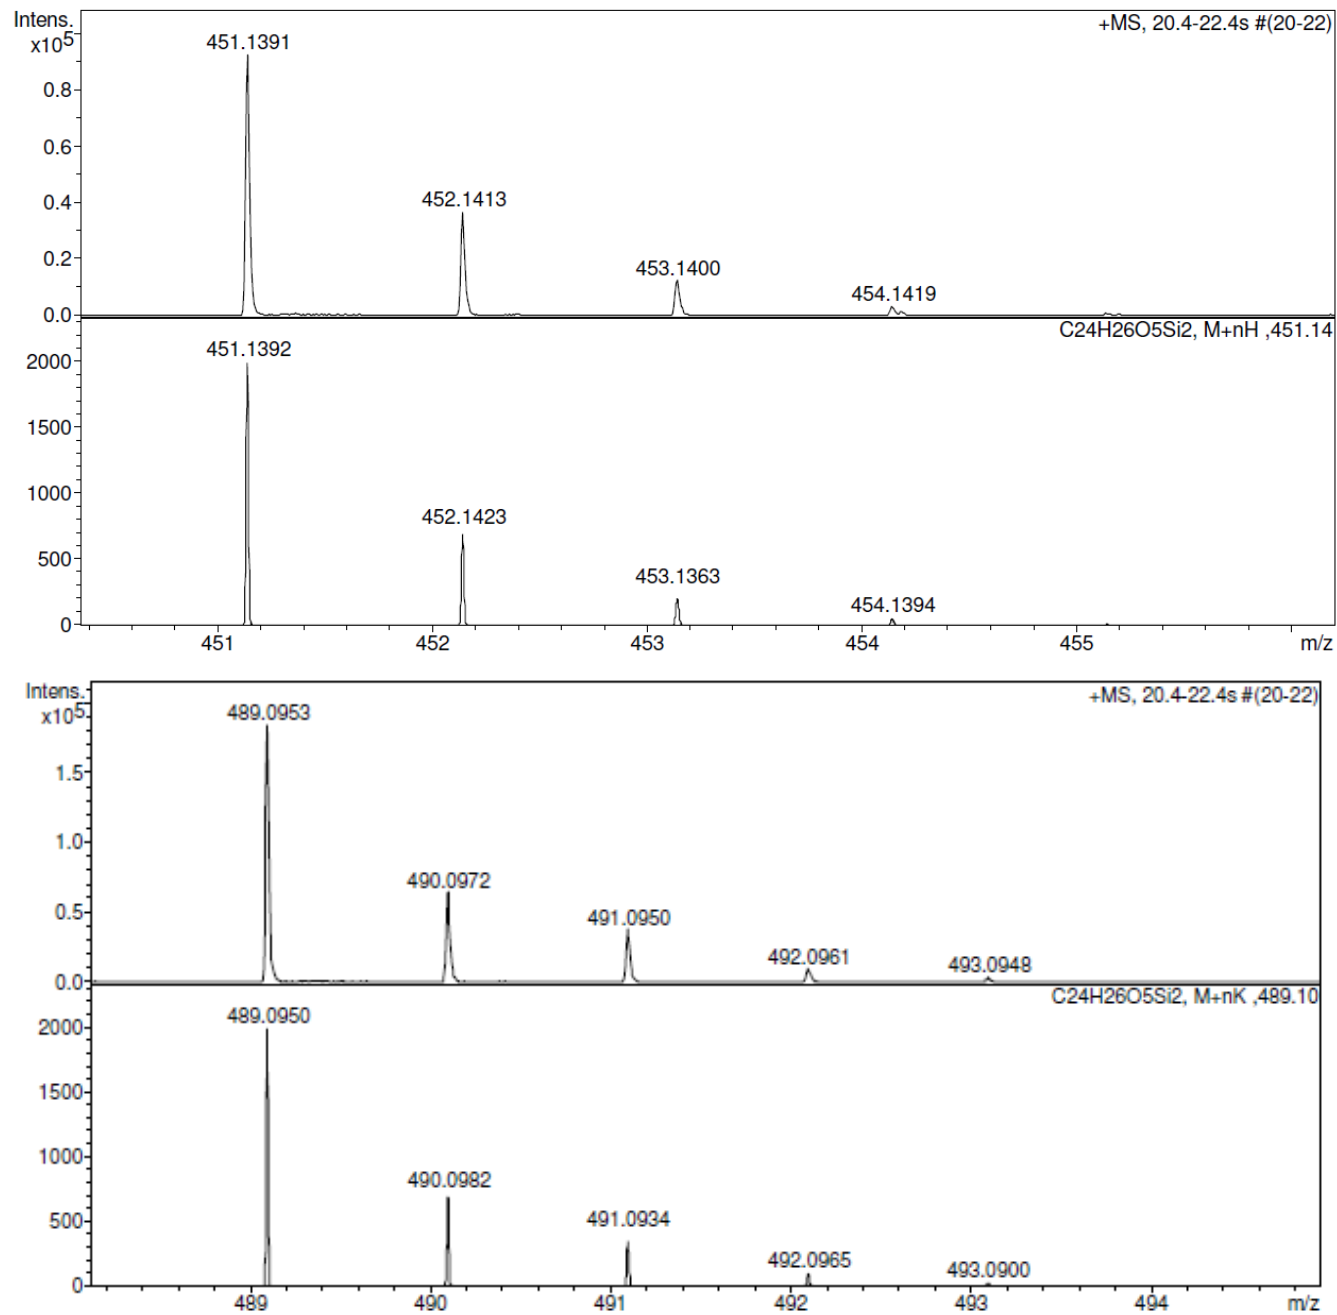

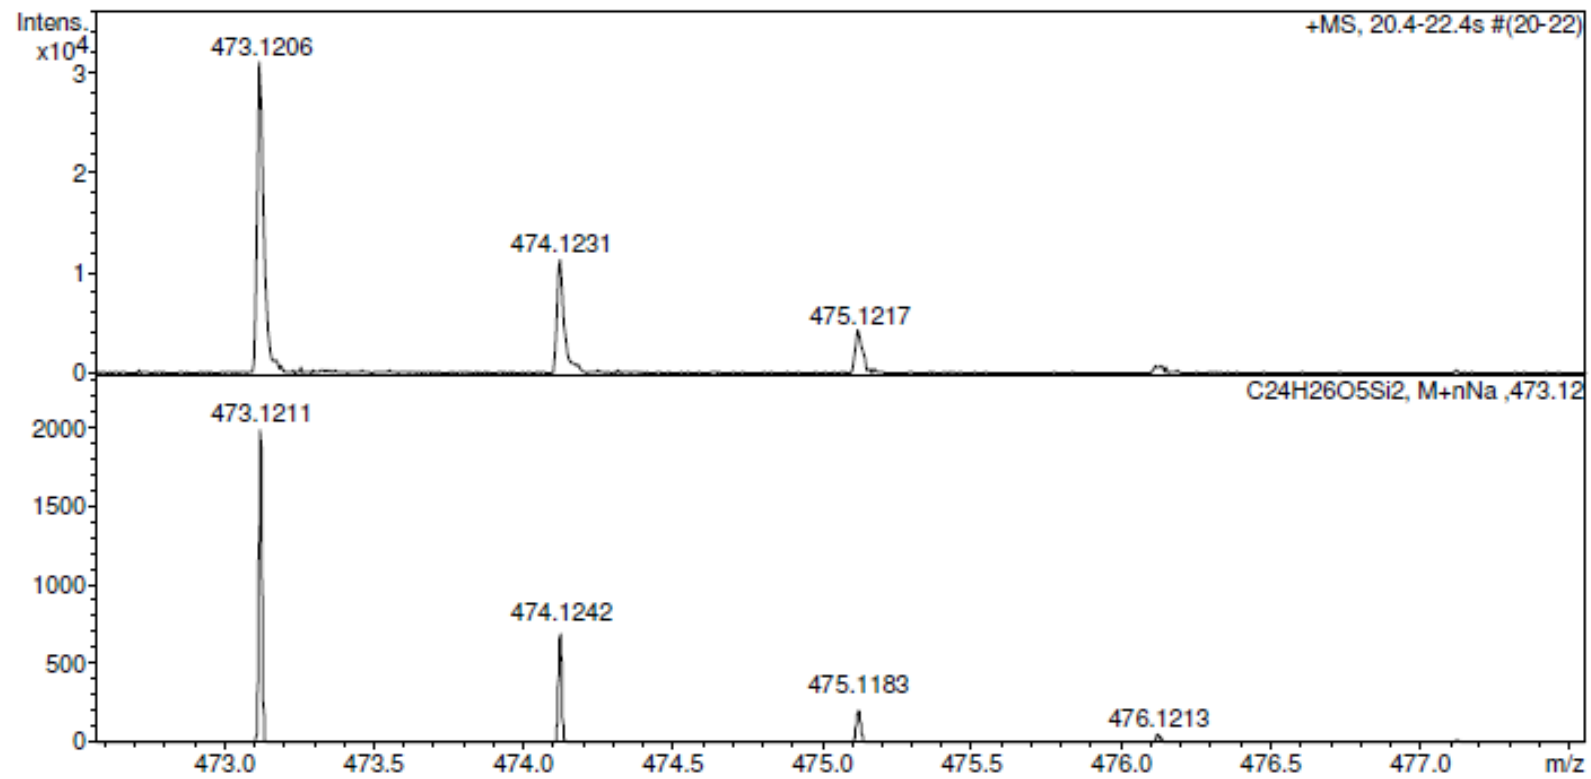

S30

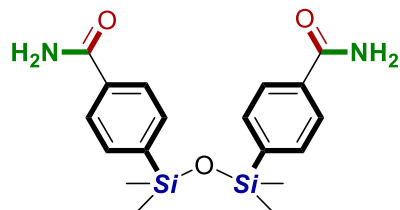

**Characterisation data for 4,4'-(1,1,3,3-tetramethyldisiloxane-1,3-diyl)dibenzamide:**

$^1\text{H}$  NMR (400 MHz, DMSO- $d_6$ ):  $\delta = 7.98$  (br s, 2H),  $\delta = 7.87$  (d,  $^3J=11$  Hz, 4H),  $\delta = 7.61$  (d,  $^3J=11$  Hz, 4H),  $\delta = 7.38$  (br s, 2H),  $\delta = 0.34$  (s, 12H).  $^{13}\text{C}$  NMR (100 MHz, DMSO- $d_6$ ):  $\delta = 167.95, 142.63, 135.18, 132.66, 126.67, 0.67$ .  $^{29}\text{Si}$  NMR (80 MHz, DMSO- $d_6$ ):  $\delta = -0.56$ .  $^{15}\text{N}$  NMR (40 MHz, DMSO- $d_6$ ):  $\delta = 103.21$ .

<sup>1</sup>H NMR

(400 MHz, DMSO-d6)

S31

7.98  
7.88  
7.86  
7.62  
7.60  
7.38

s | s

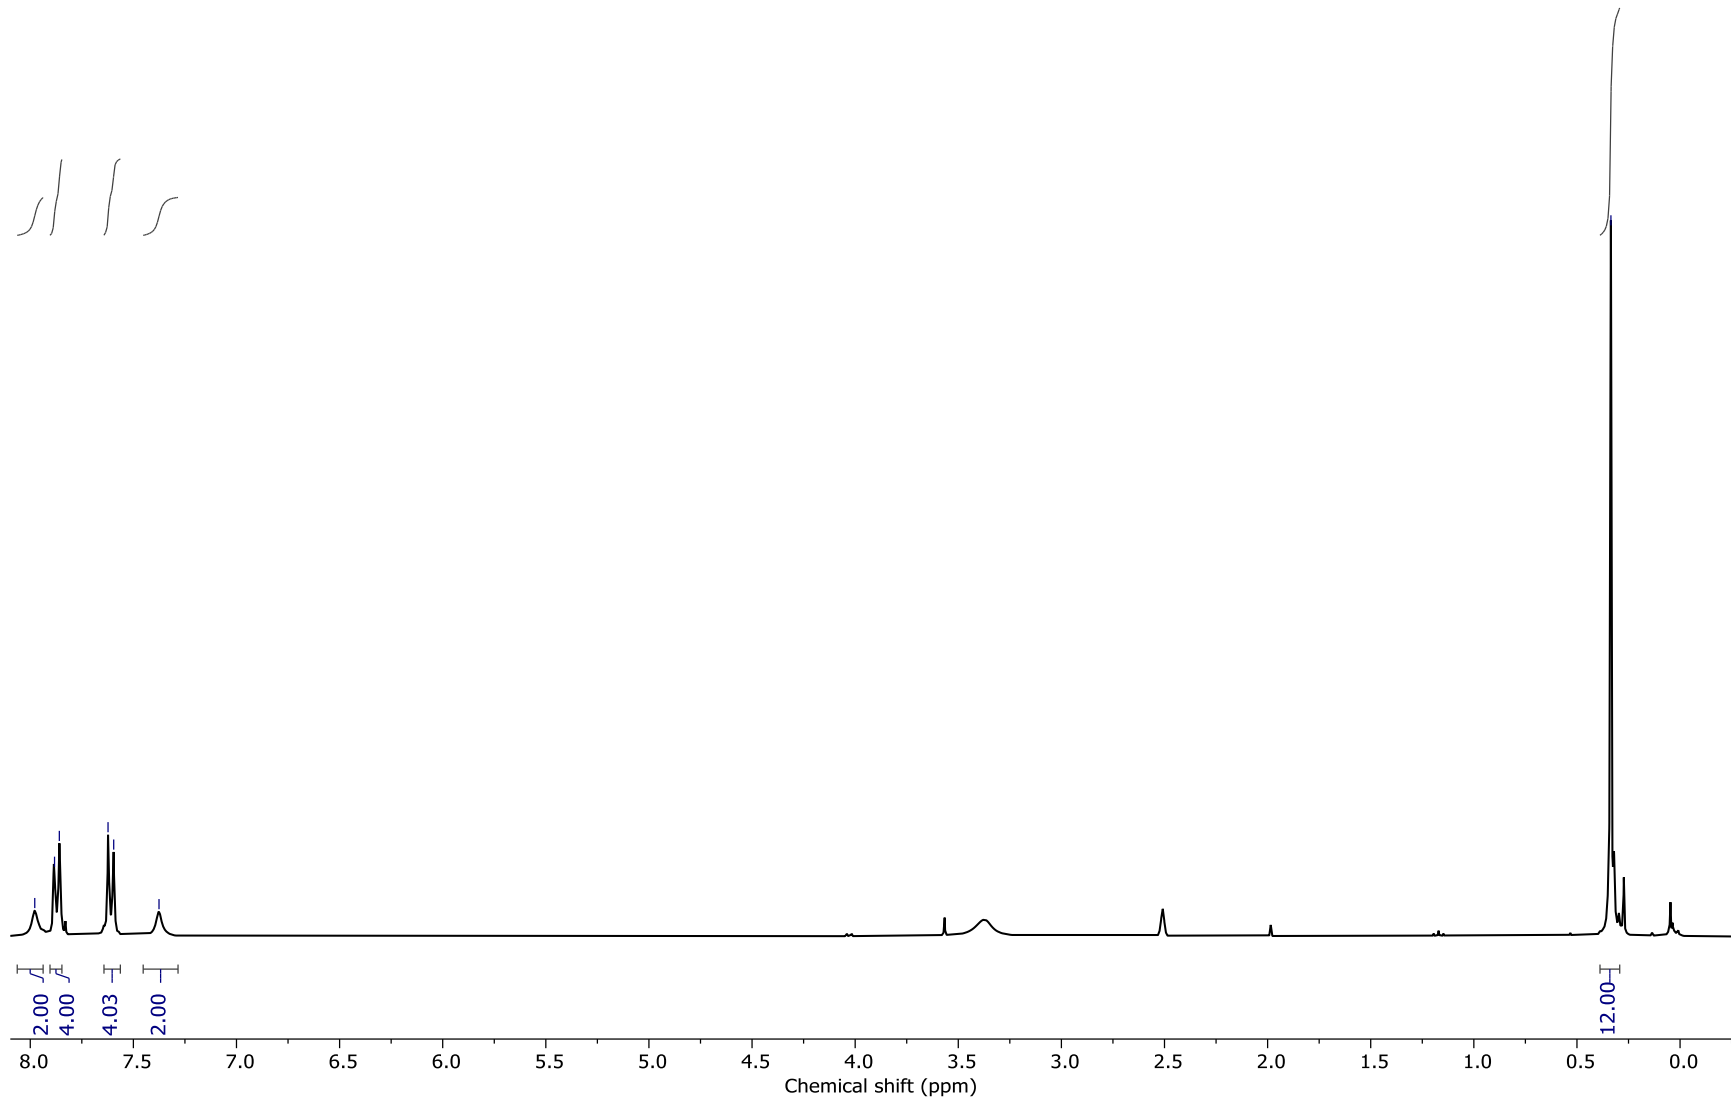

$^{13}\text{C}$  NMR  
(100 MHz, DMSO- $d_6$ )

S32

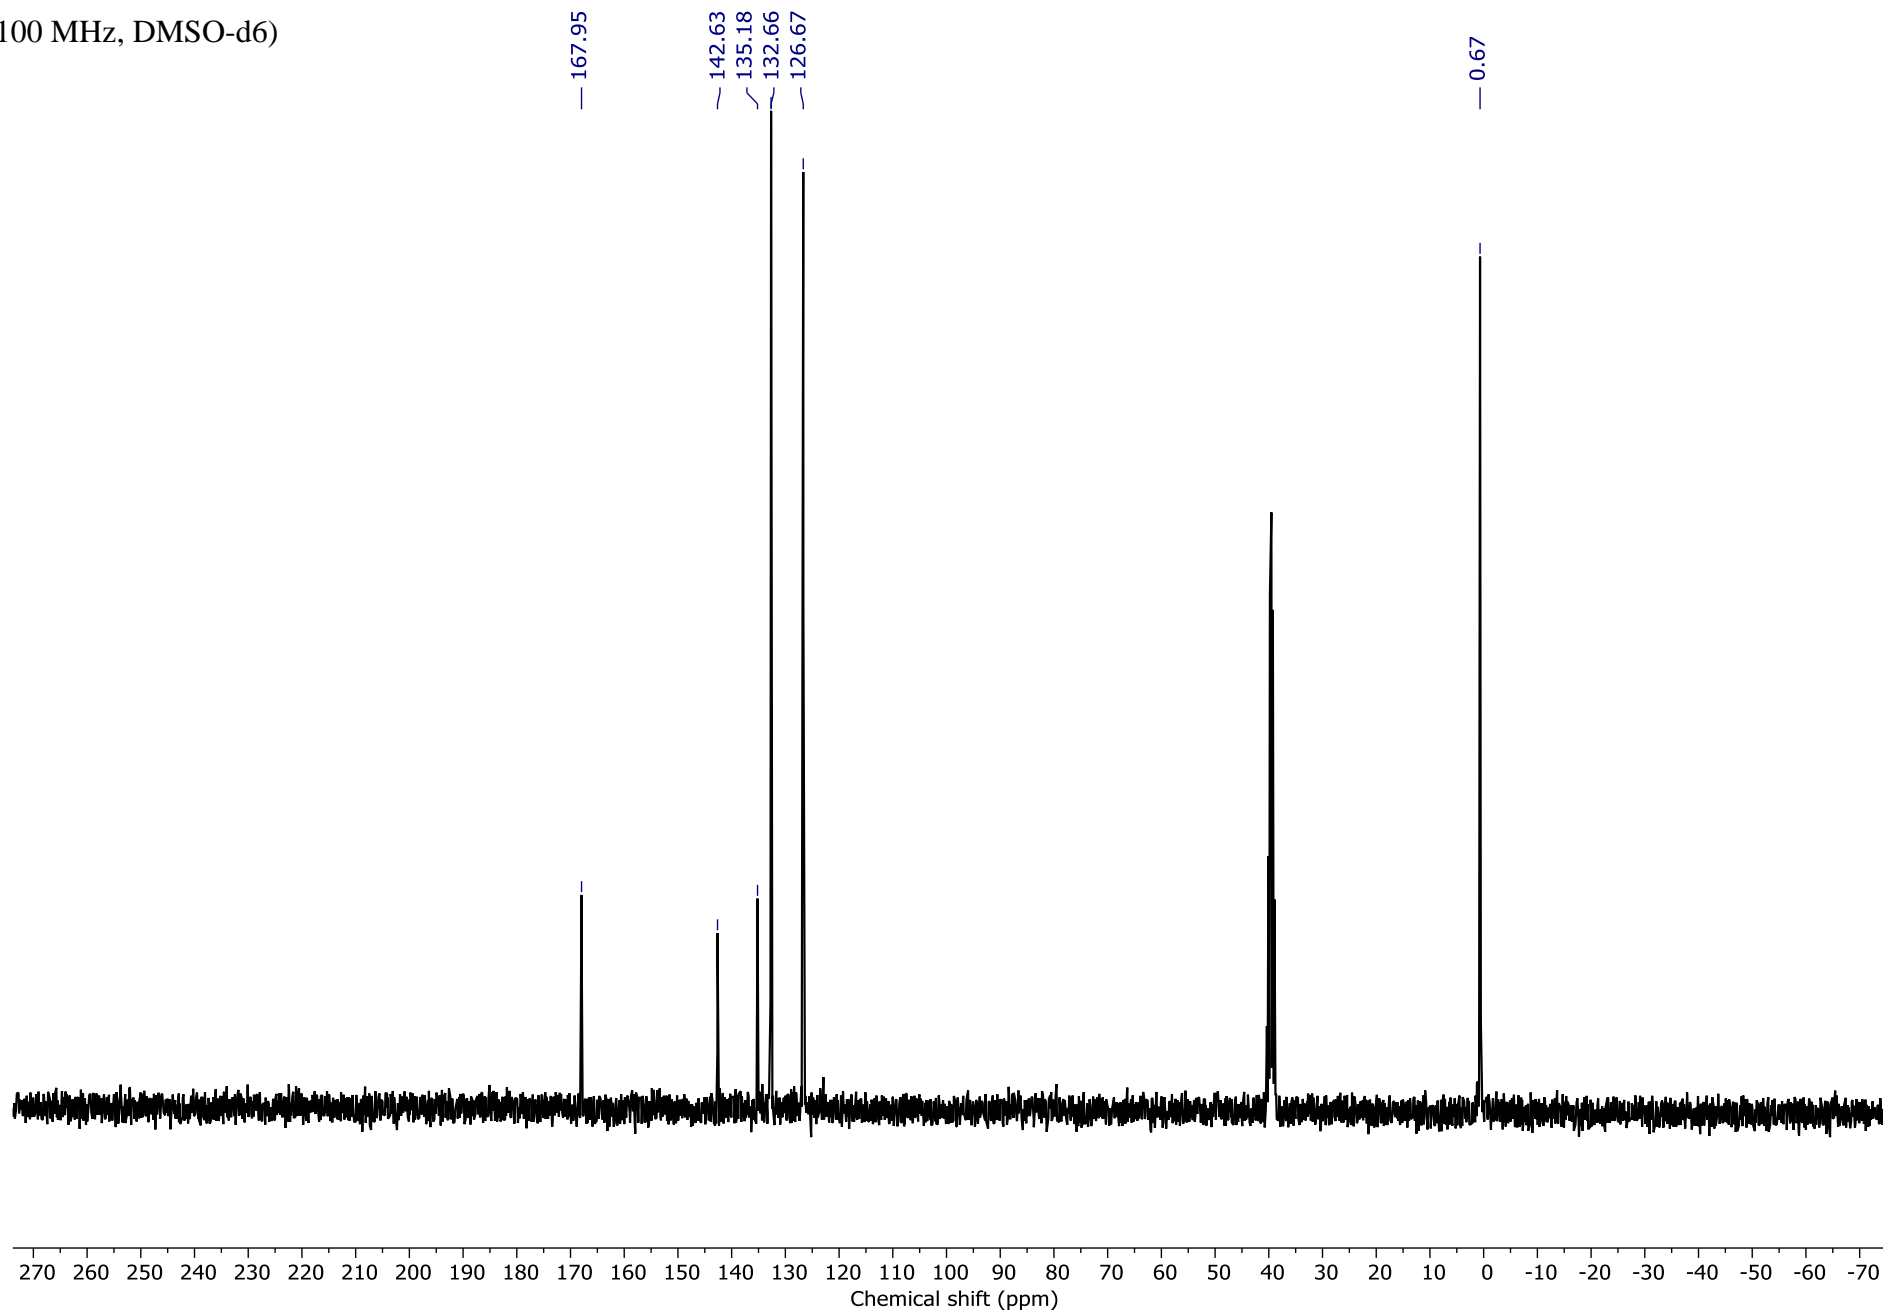



$^{29}\text{Si}$  NMR  
(80 MHz, DMSO-d<sub>6</sub>)

S33

-0.56

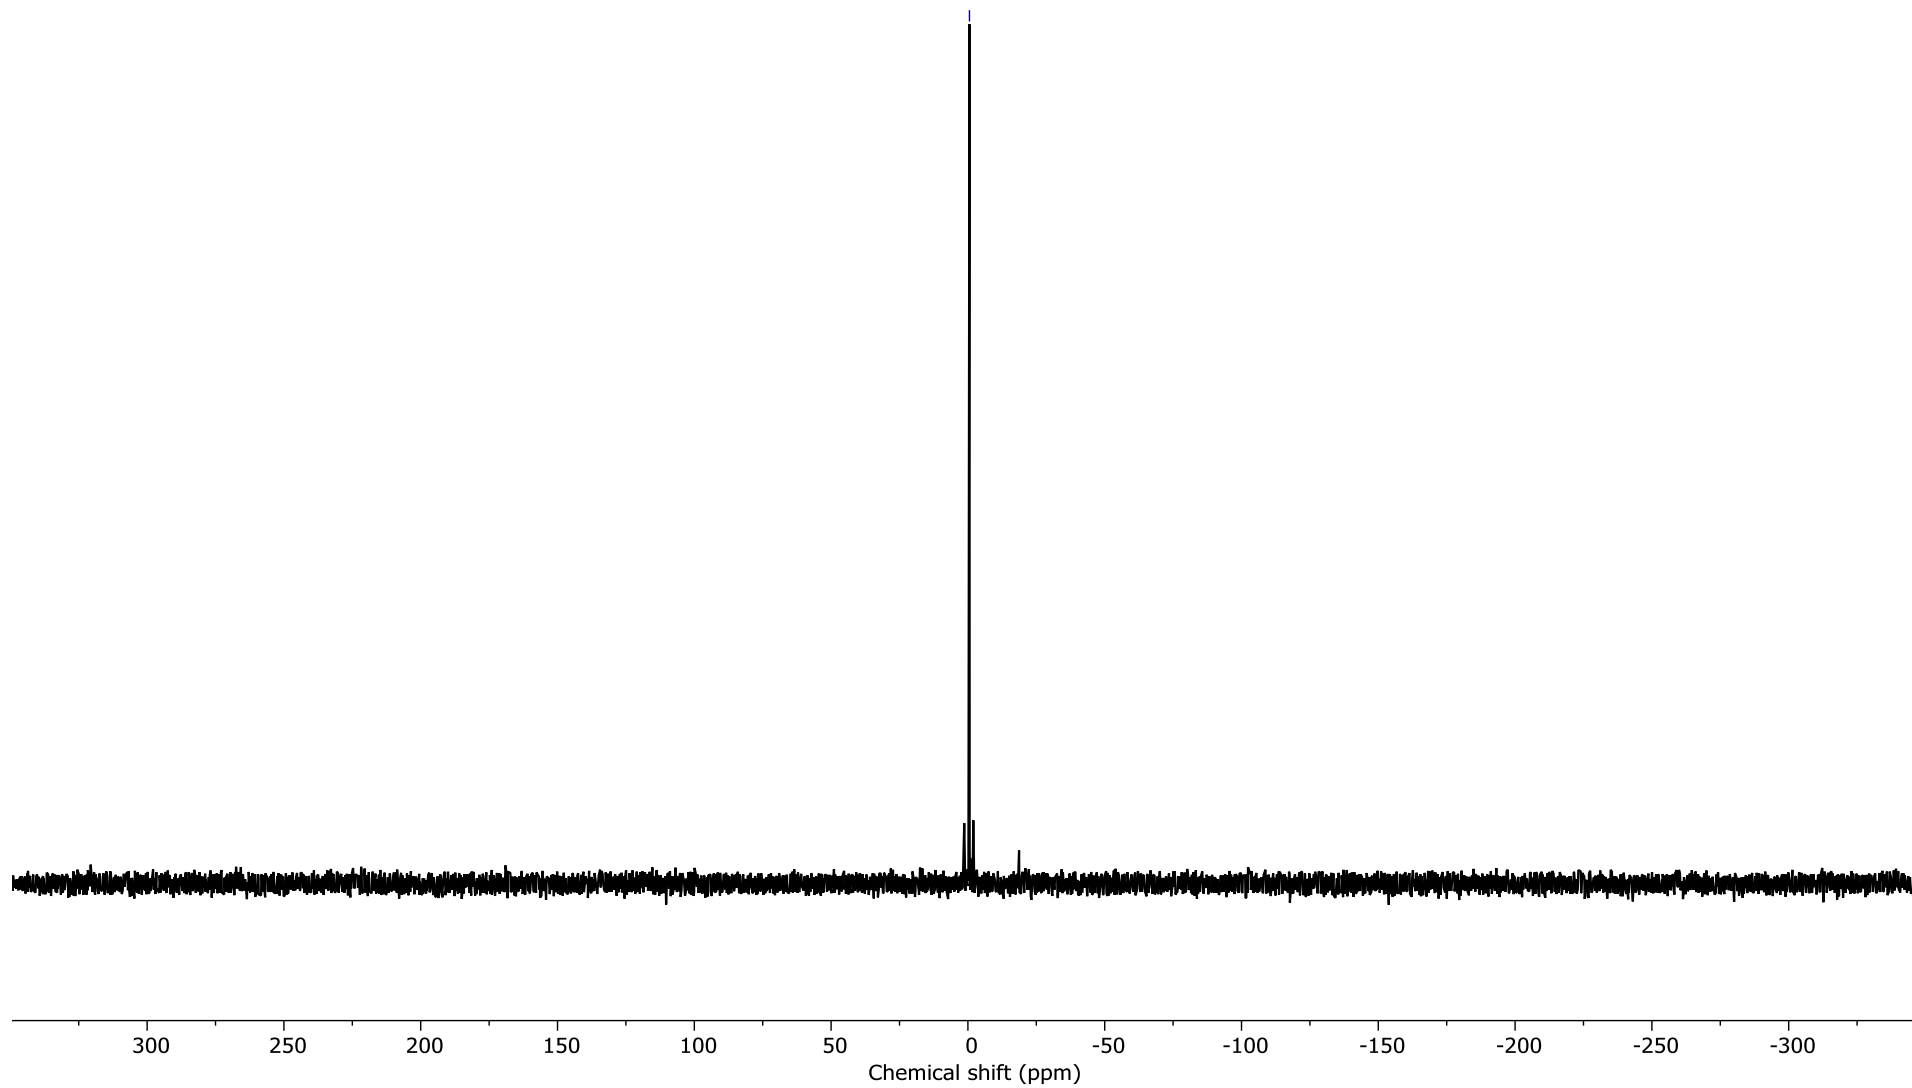

S34

$^{15}\text{N}$  NMR  
(reconstructed, 40 MHz,  
DMSO-d<sub>6</sub>)

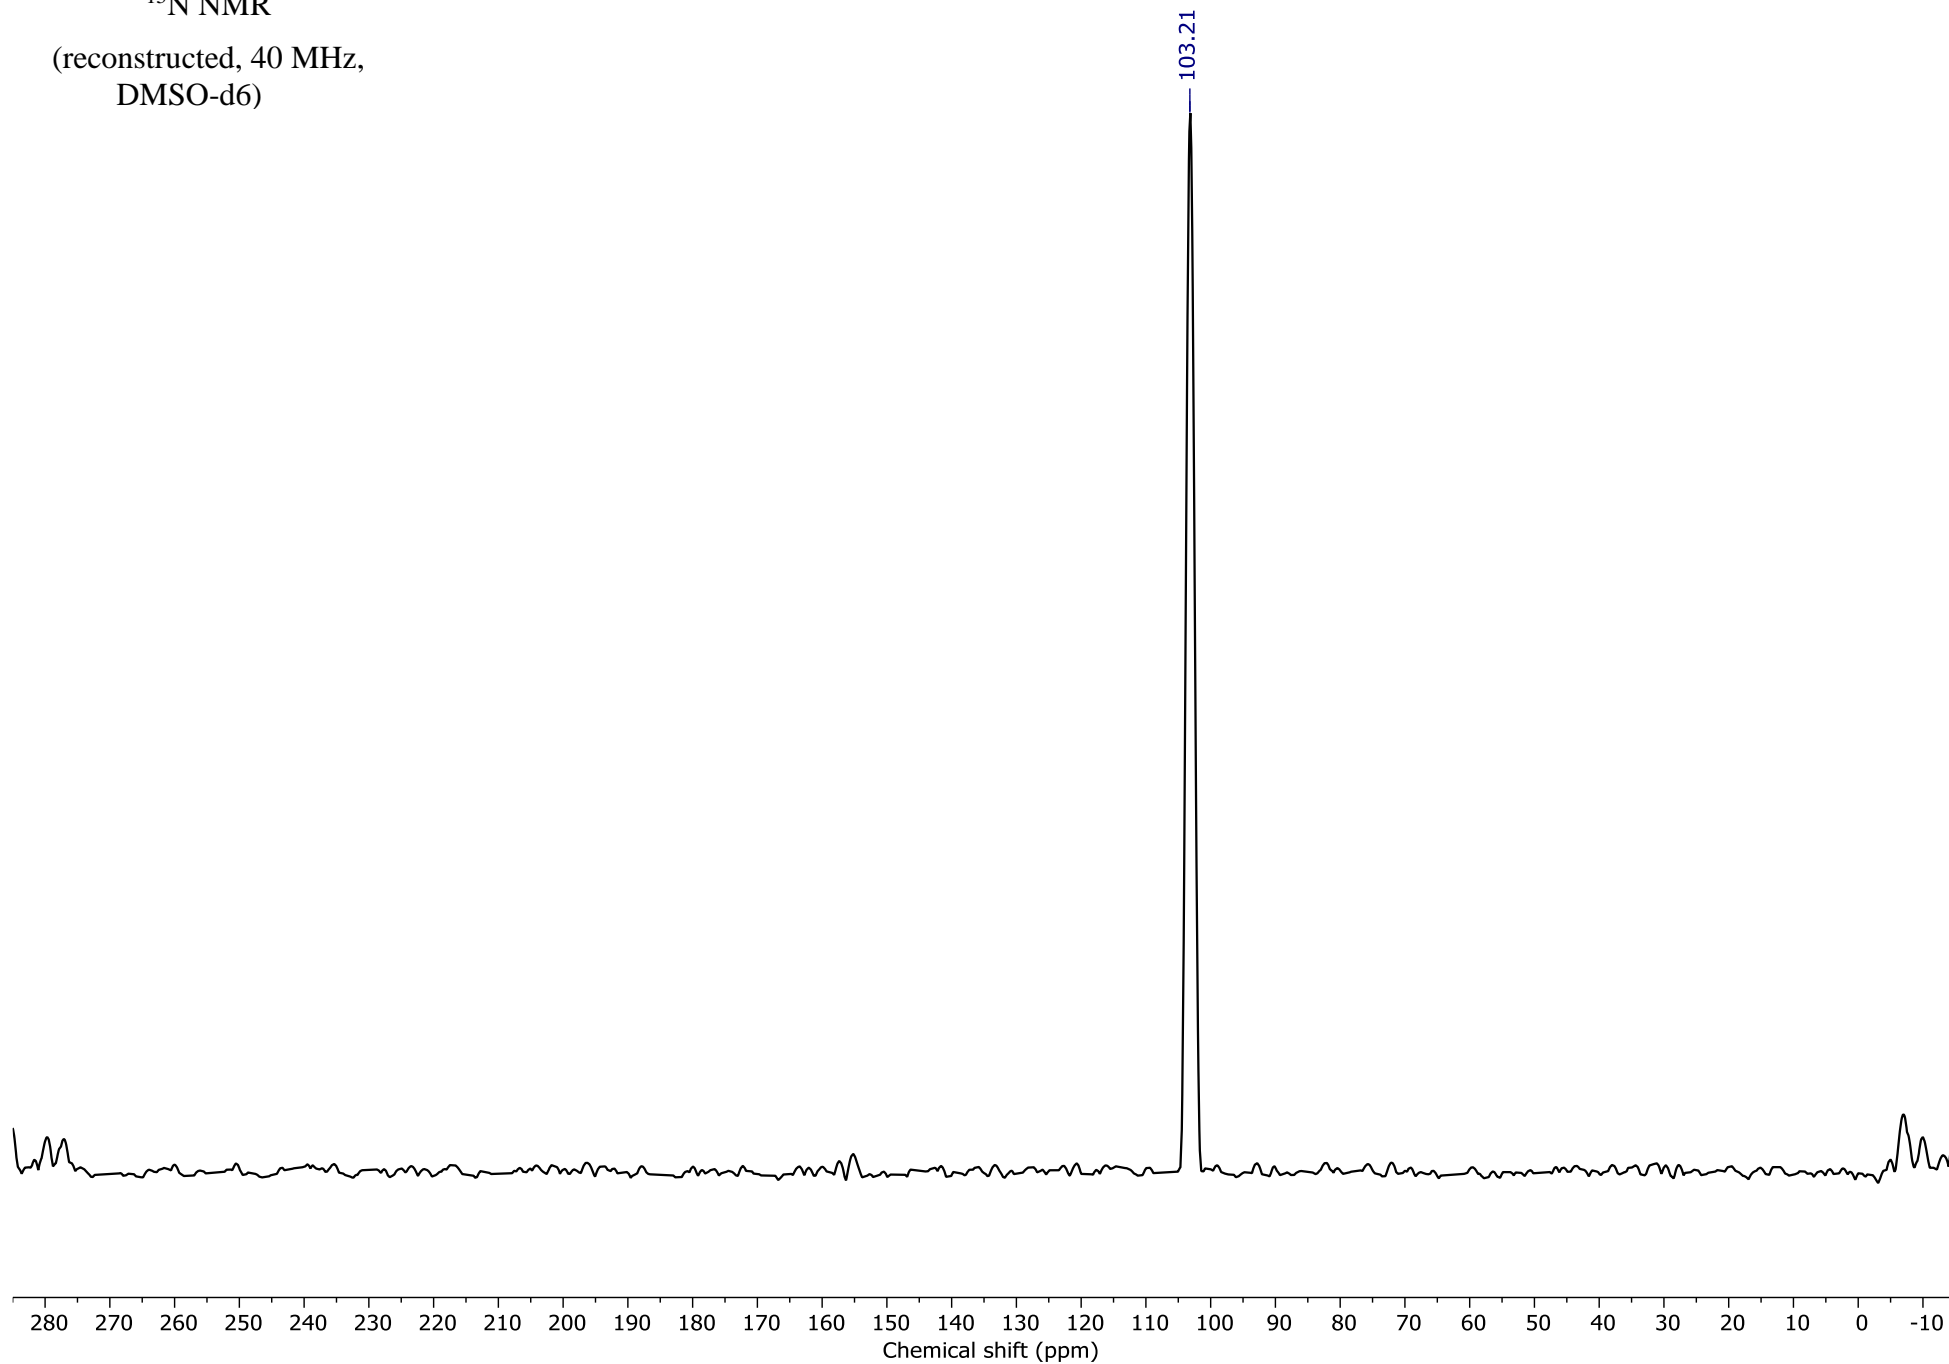

S35

$^1\text{H} - ^{15}\text{N}$  HMBC  
(400 MHz, DMSO-d6)

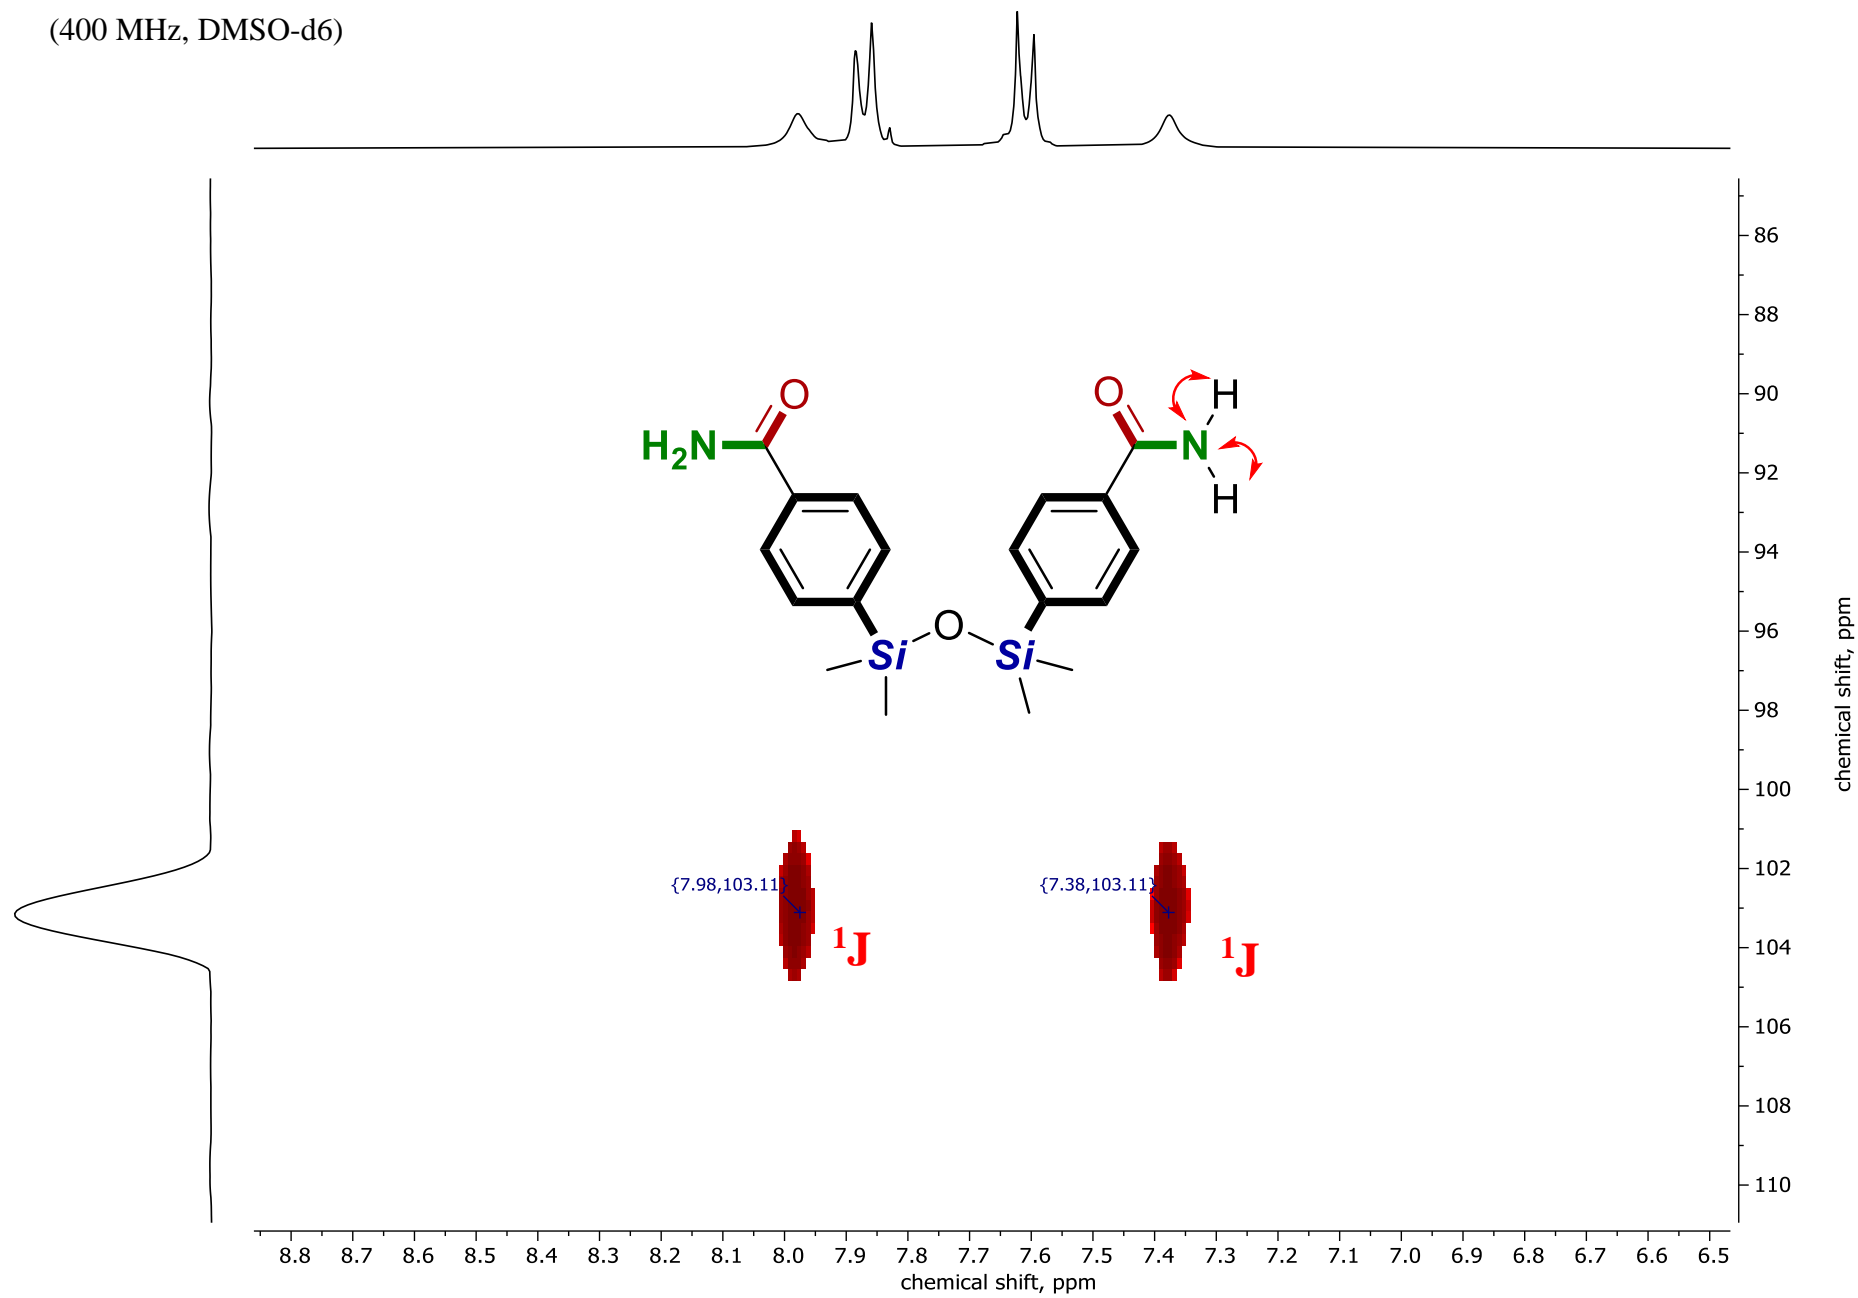

$^1\text{H} - ^{13}\text{C}$  HMBC  
(400 MHz, DMSO-d<sub>6</sub>)

S36

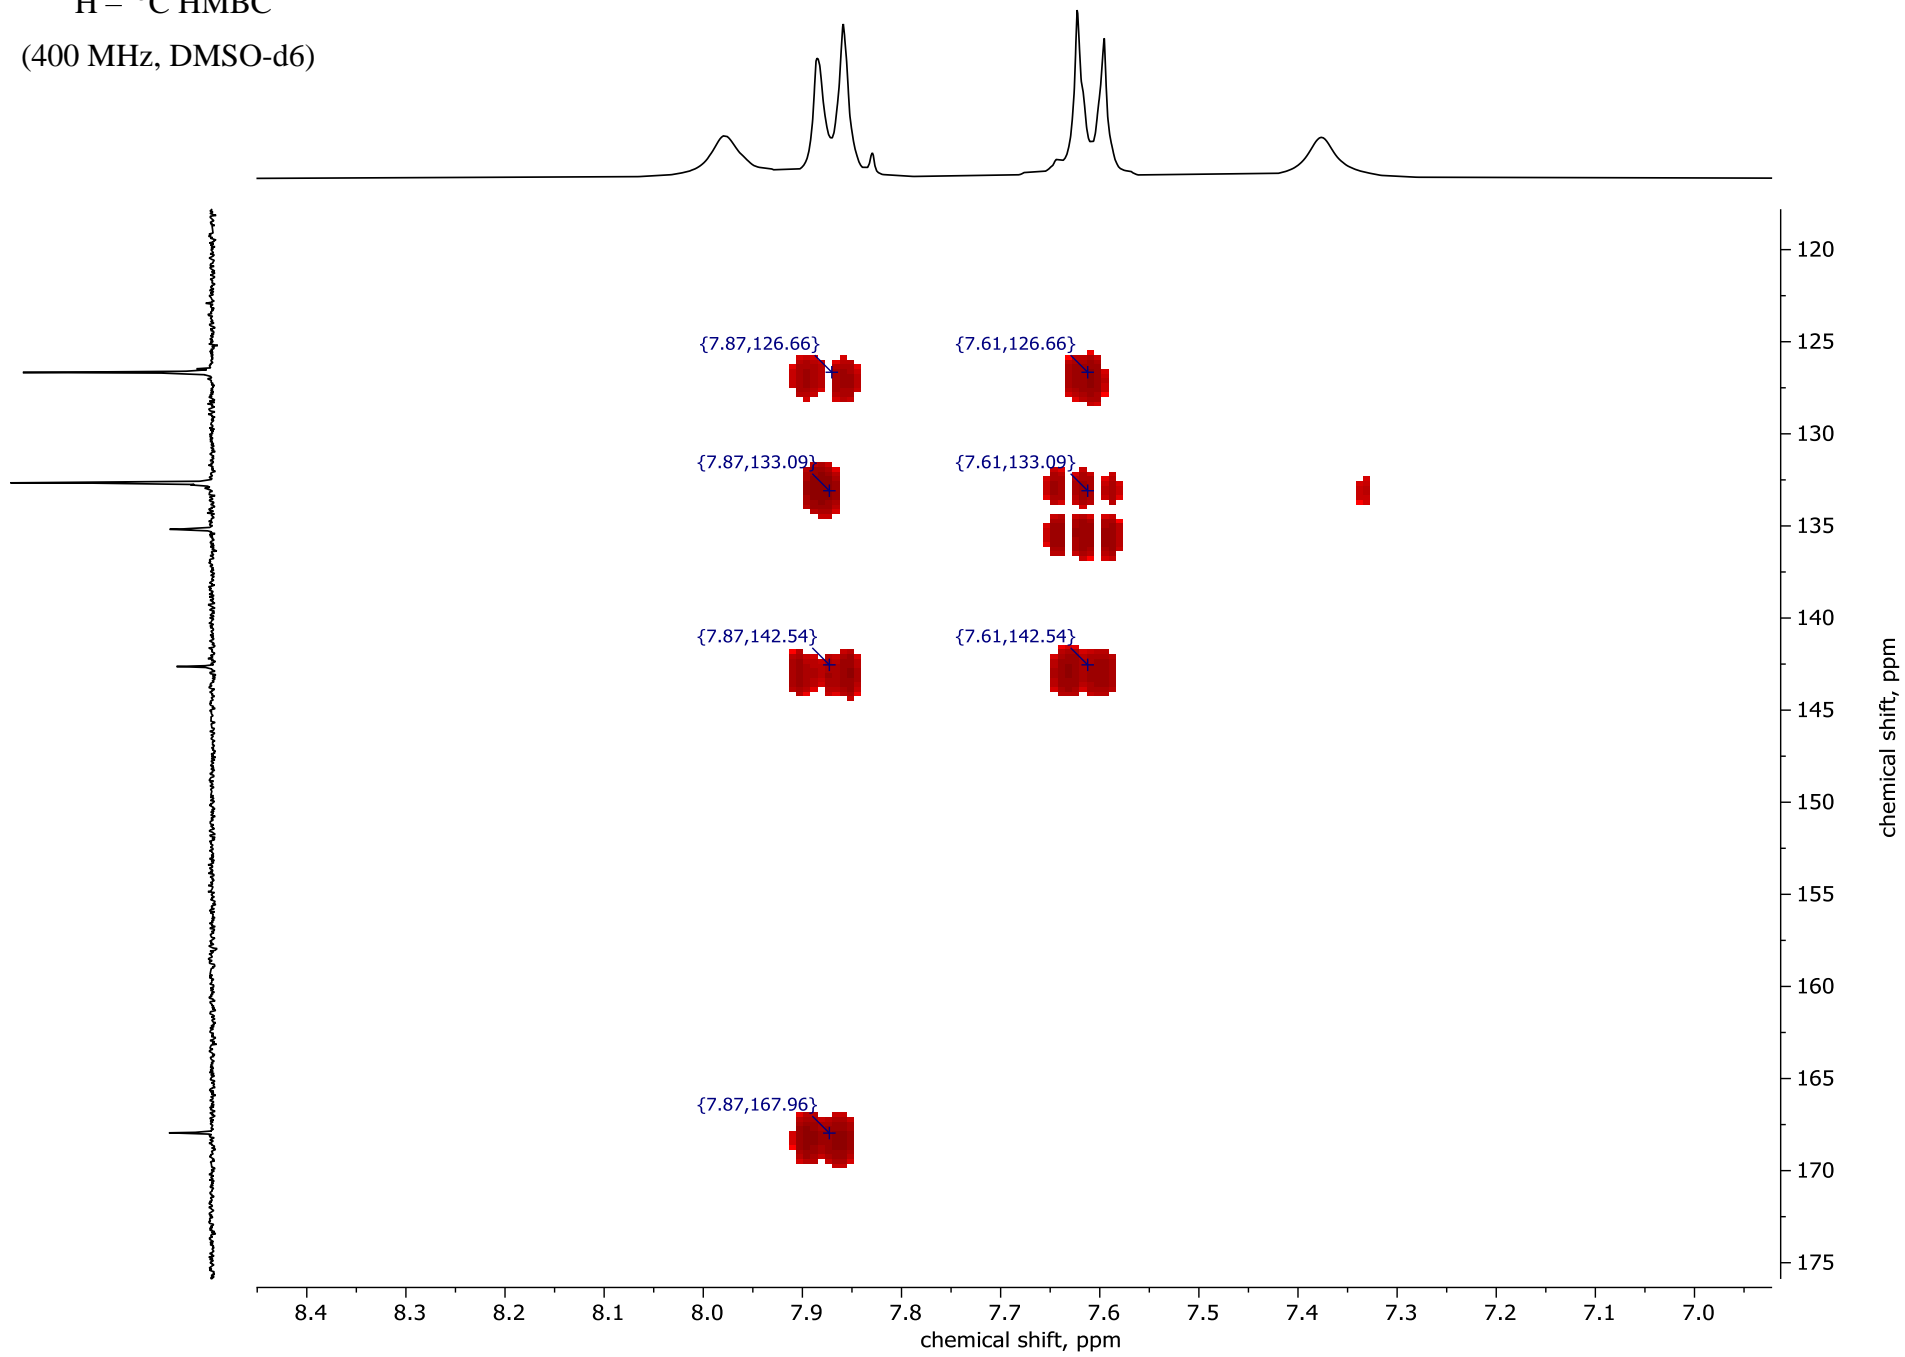

$^1\text{H} - ^{13}\text{C}$  HSQC

S37

(400 MHz, DMSO-d<sub>6</sub>)

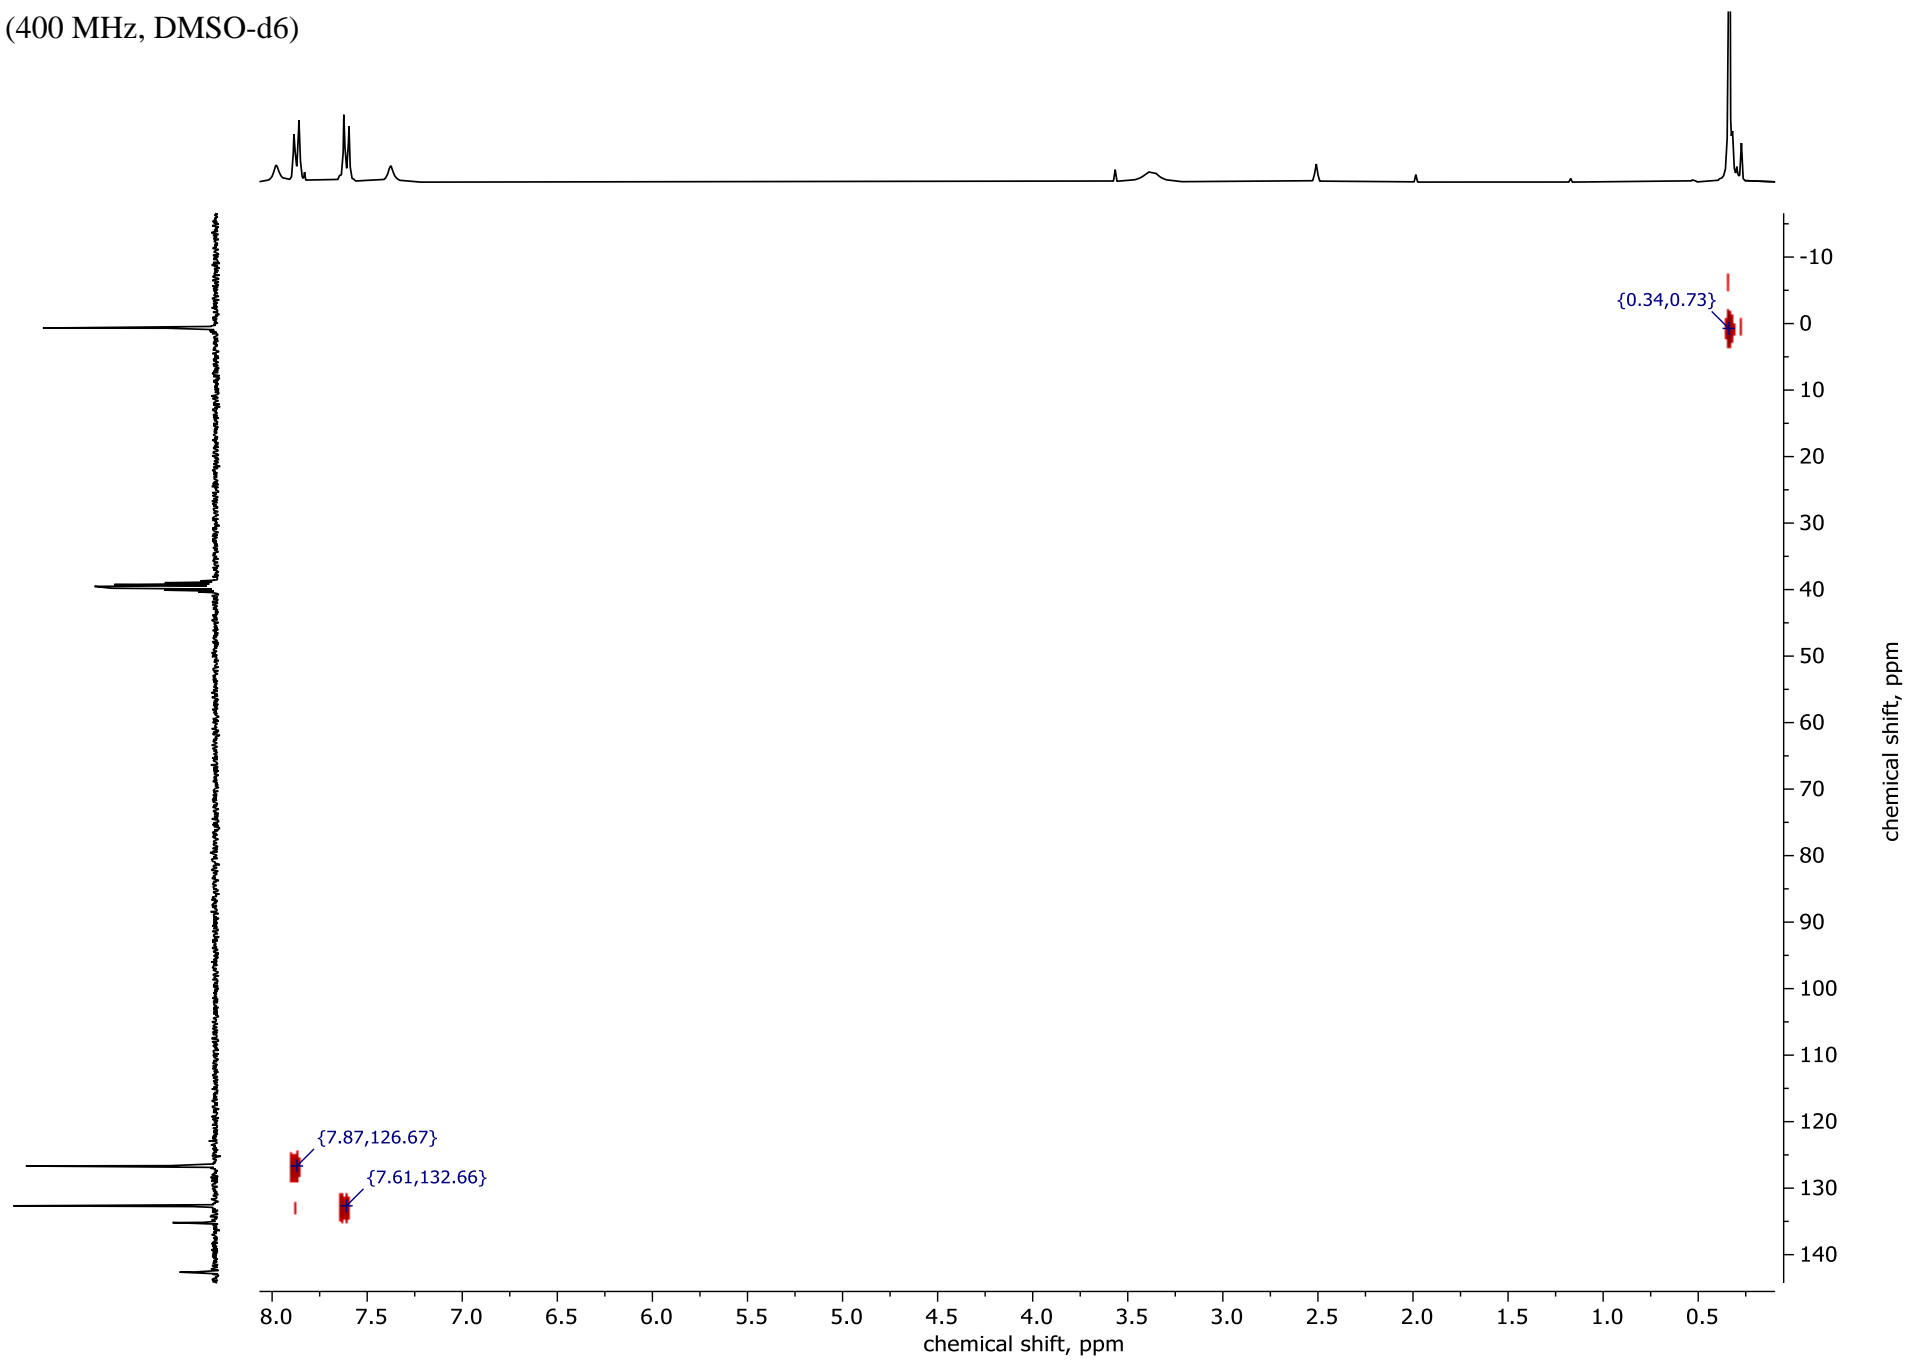

$^1\text{H} - ^{29}\text{Si}$  HMBC

S38

(400 MHz, DMSO-d<sub>6</sub>)

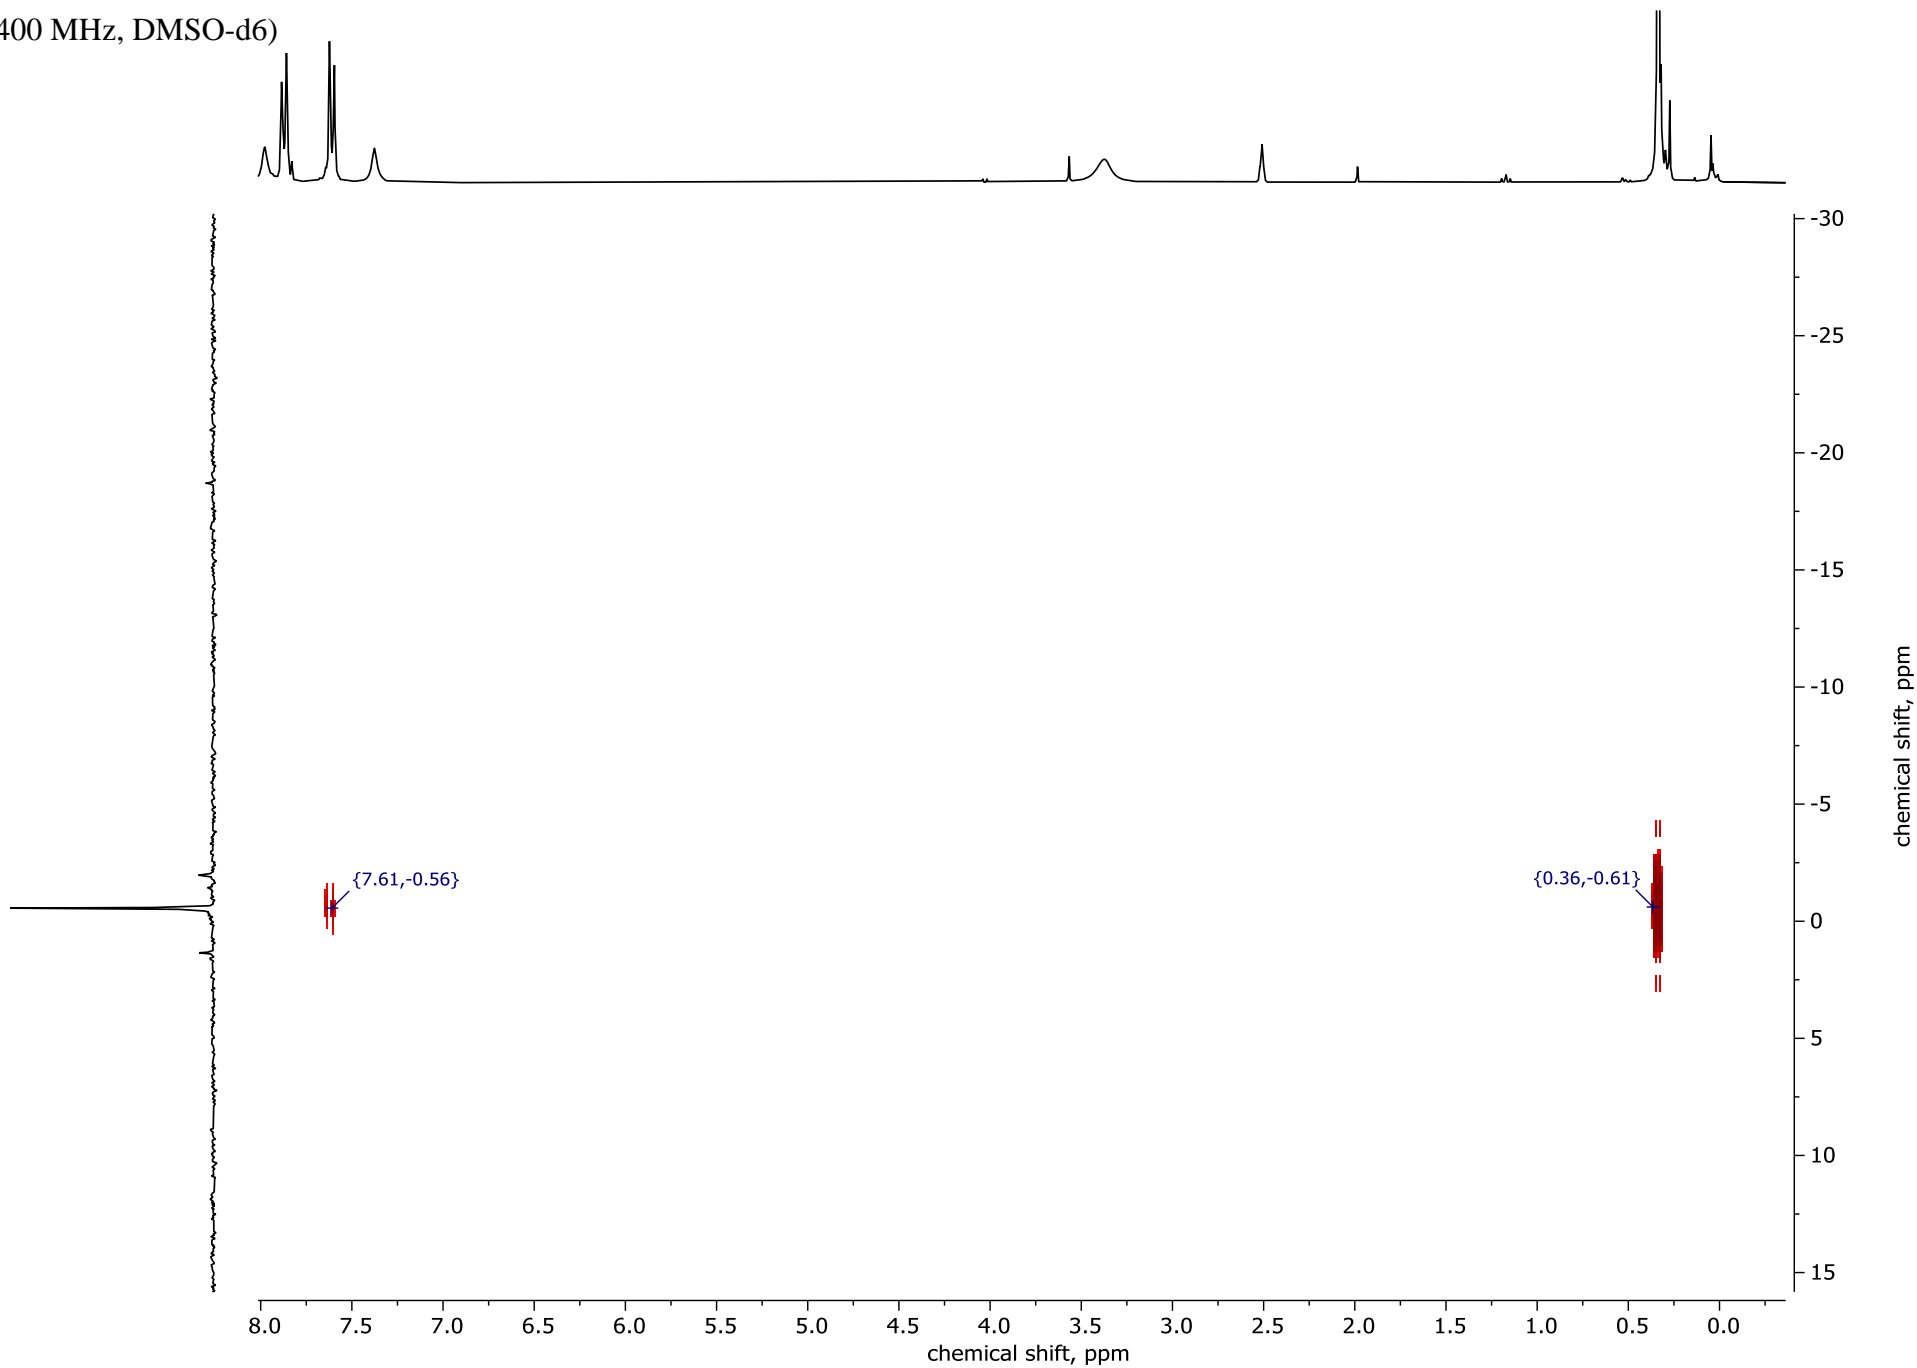

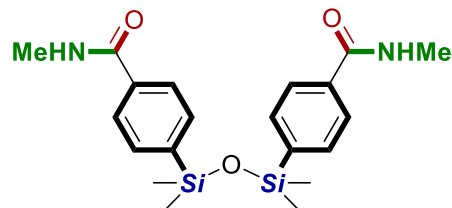

**Characterisation data for 4,4'-(1,1,3,3-tetramethyldisiloxane-1,3-diyl)bis(N-methylbenzamide):**

$^1\text{H}$  NMR (400 MHz, DMSO- $d_6$ ):  $\delta$  = 8.44 (m, 2H),  $\delta$  = 7.83 (d,  $^3J$  = 8 Hz, 4H),  $\delta$  = 7.60 (d,  $^3J$  = 8Hz, 4H),  $\delta$  = 2.80 (d,  $^3J$  = 4.6 Hz, 6H),  $\delta$  = 0.33 (s, 12H).  $^{13}\text{C}$  NMR (100 MHz, DMSO- $d_6$ ):  $\delta$  = 167.09, 142.82, 135.90, 133.18, 126.74, 26.68, 1.10.  $^{29}\text{Si}$  NMR (80 MHz, DMSO- $d_6$ ):  $\delta$  = -0.57.  $^{15}\text{N}$  NMR (40 MHz, DMSO- $d_6$ ):  $\delta$  = 99.46. HRMS (ESI)  $m/z$   $[\text{M} + \text{H}]^+$  : calcd for  $[\text{C}_{20}\text{H}_{28}\text{N}_2\text{O}_3\text{Si}_2 + \text{H}]^+$ , 401.1711; found, 401.1706;  $[\text{M} + \text{Na}]^+$  : calcd for  $[\text{C}_{20}\text{H}_{28}\text{N}_2\text{O}_3\text{Si}_2 + \text{Na}]^+$ , 423.1531; found, 423.1526;  $[\text{M} + \text{K}]^+$  : calcd for  $[\text{C}_{20}\text{H}_{28}\text{N}_2\text{O}_3\text{Si}_2 + \text{K}]^+$ , 439.1270; found, 439.1263. IR ( $\text{cm}^{-1}$ ): 3325, 2958, 1635, 1545, 1411, 1319, 1254, 1111, 1067, 830, 791.

<sup>1</sup>H NMR

(400 MHz, DMSO-d6)

S40

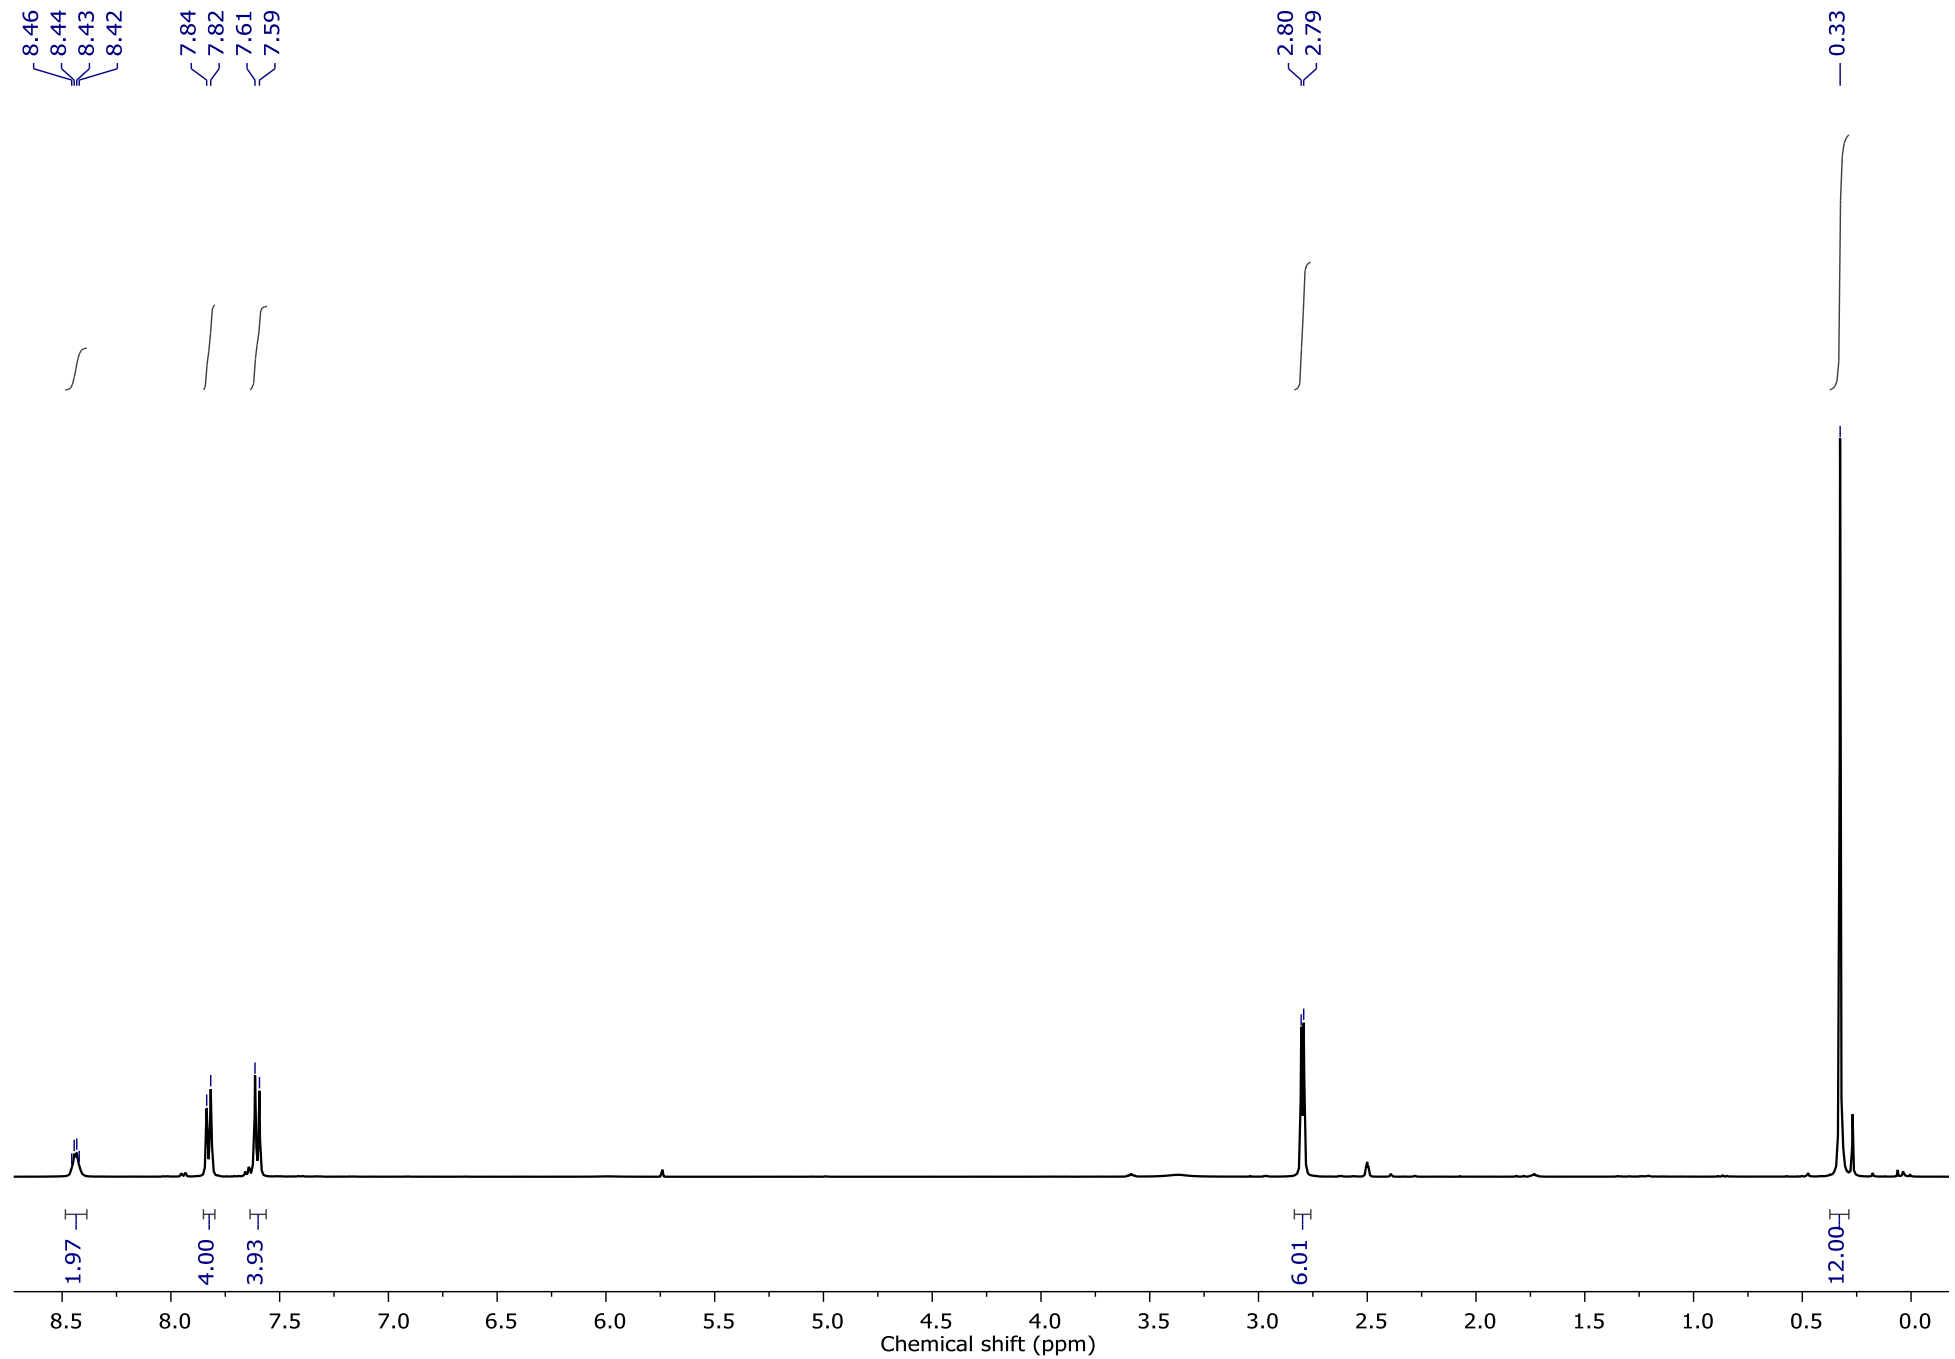



<sup>13</sup>C NMR

(100 MHz, DMSO-d6)

S41

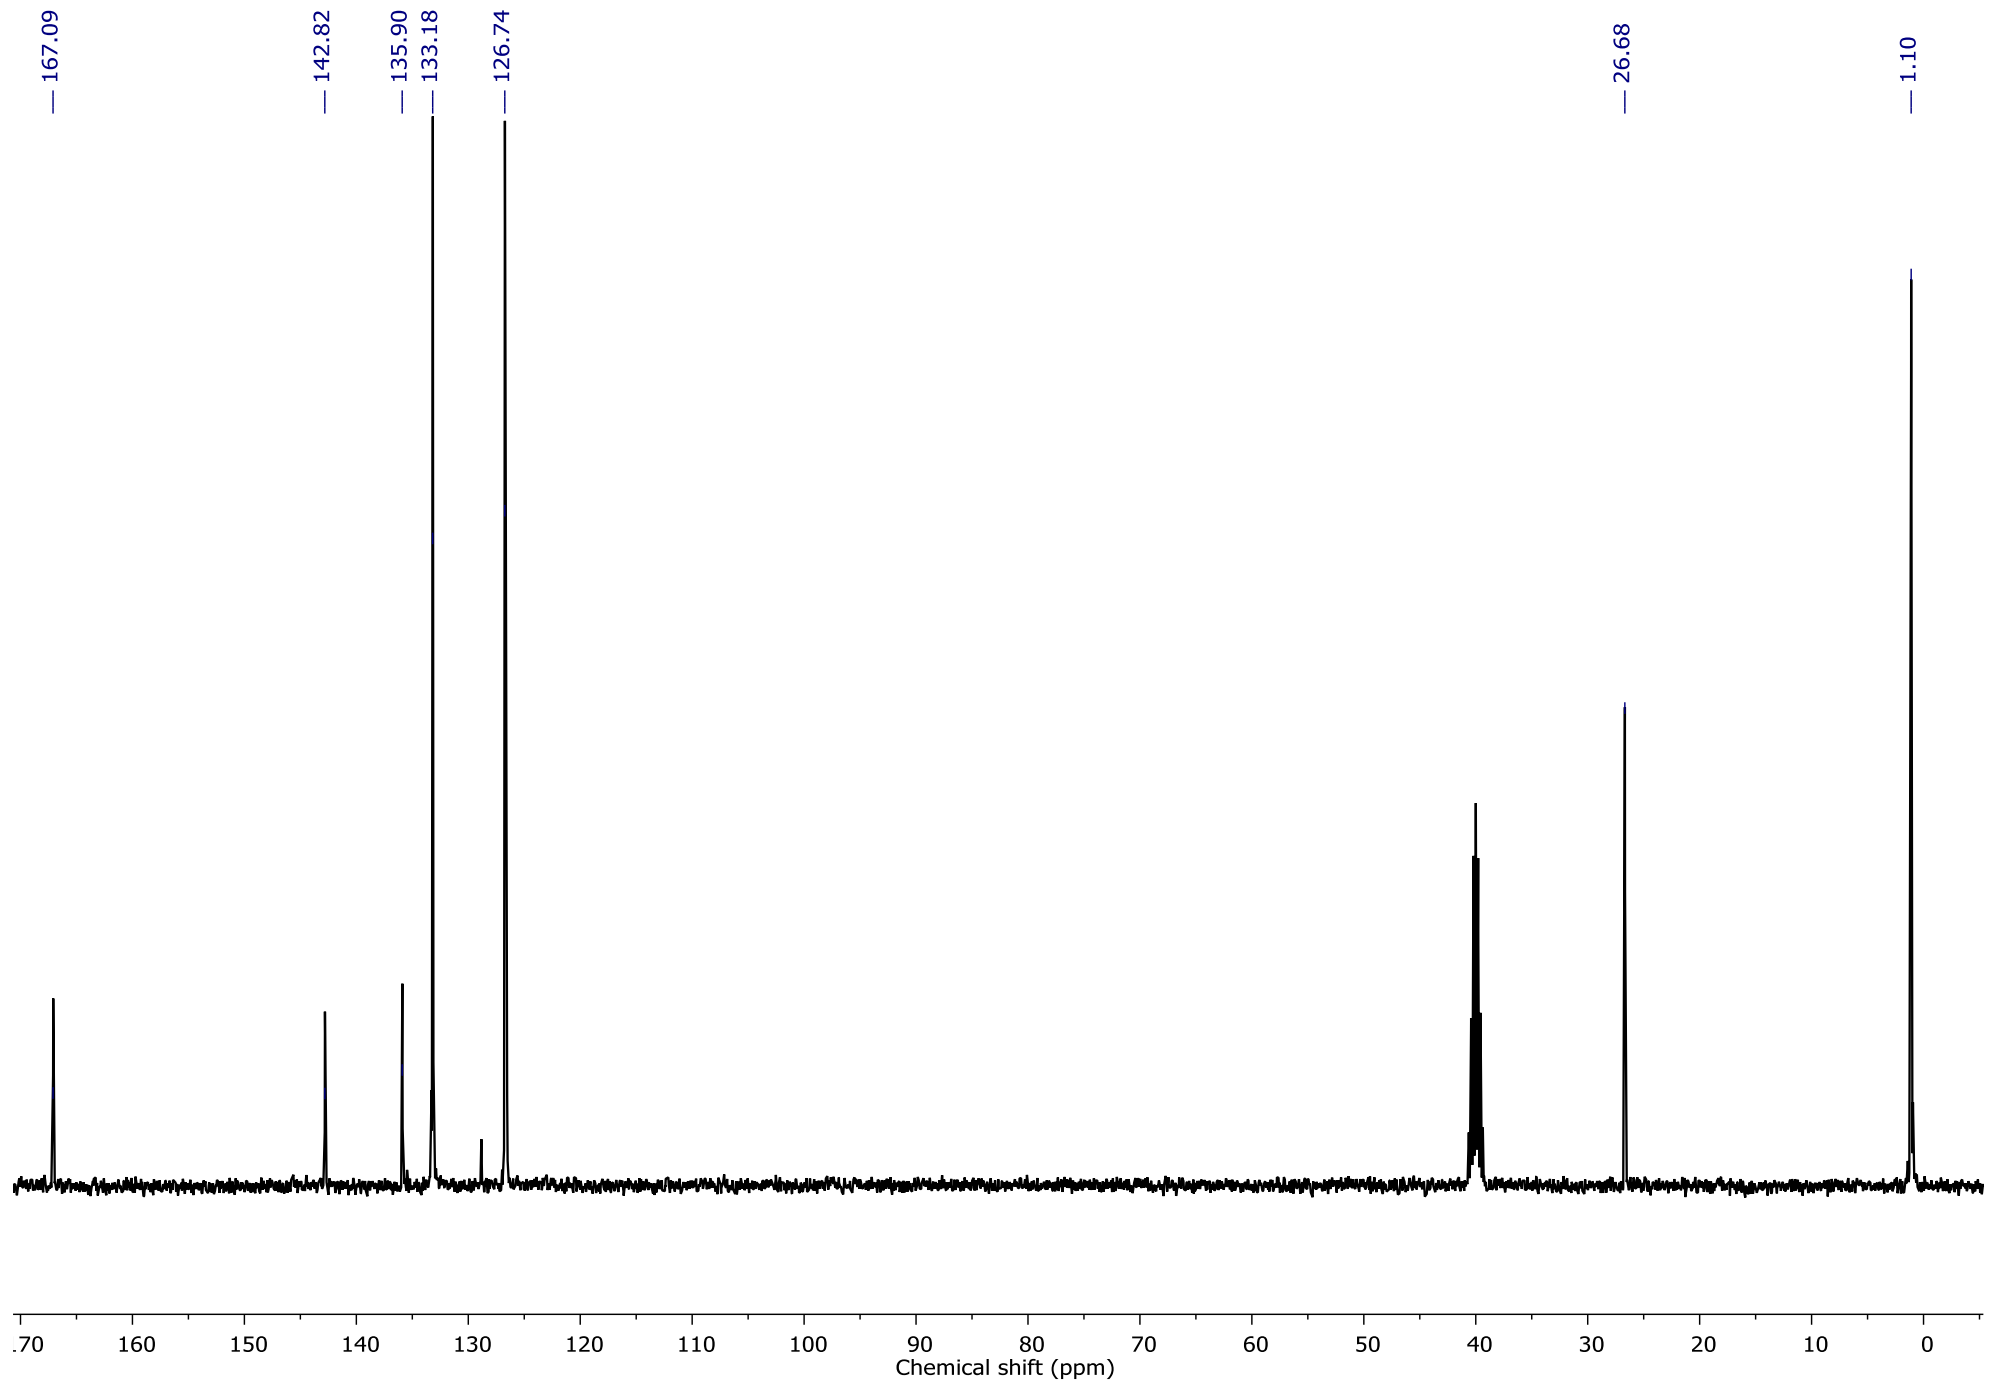

$^{29}\text{Si}$  NMR  
(80 MHz, DMSO-d<sub>6</sub>)

S42

-0.57

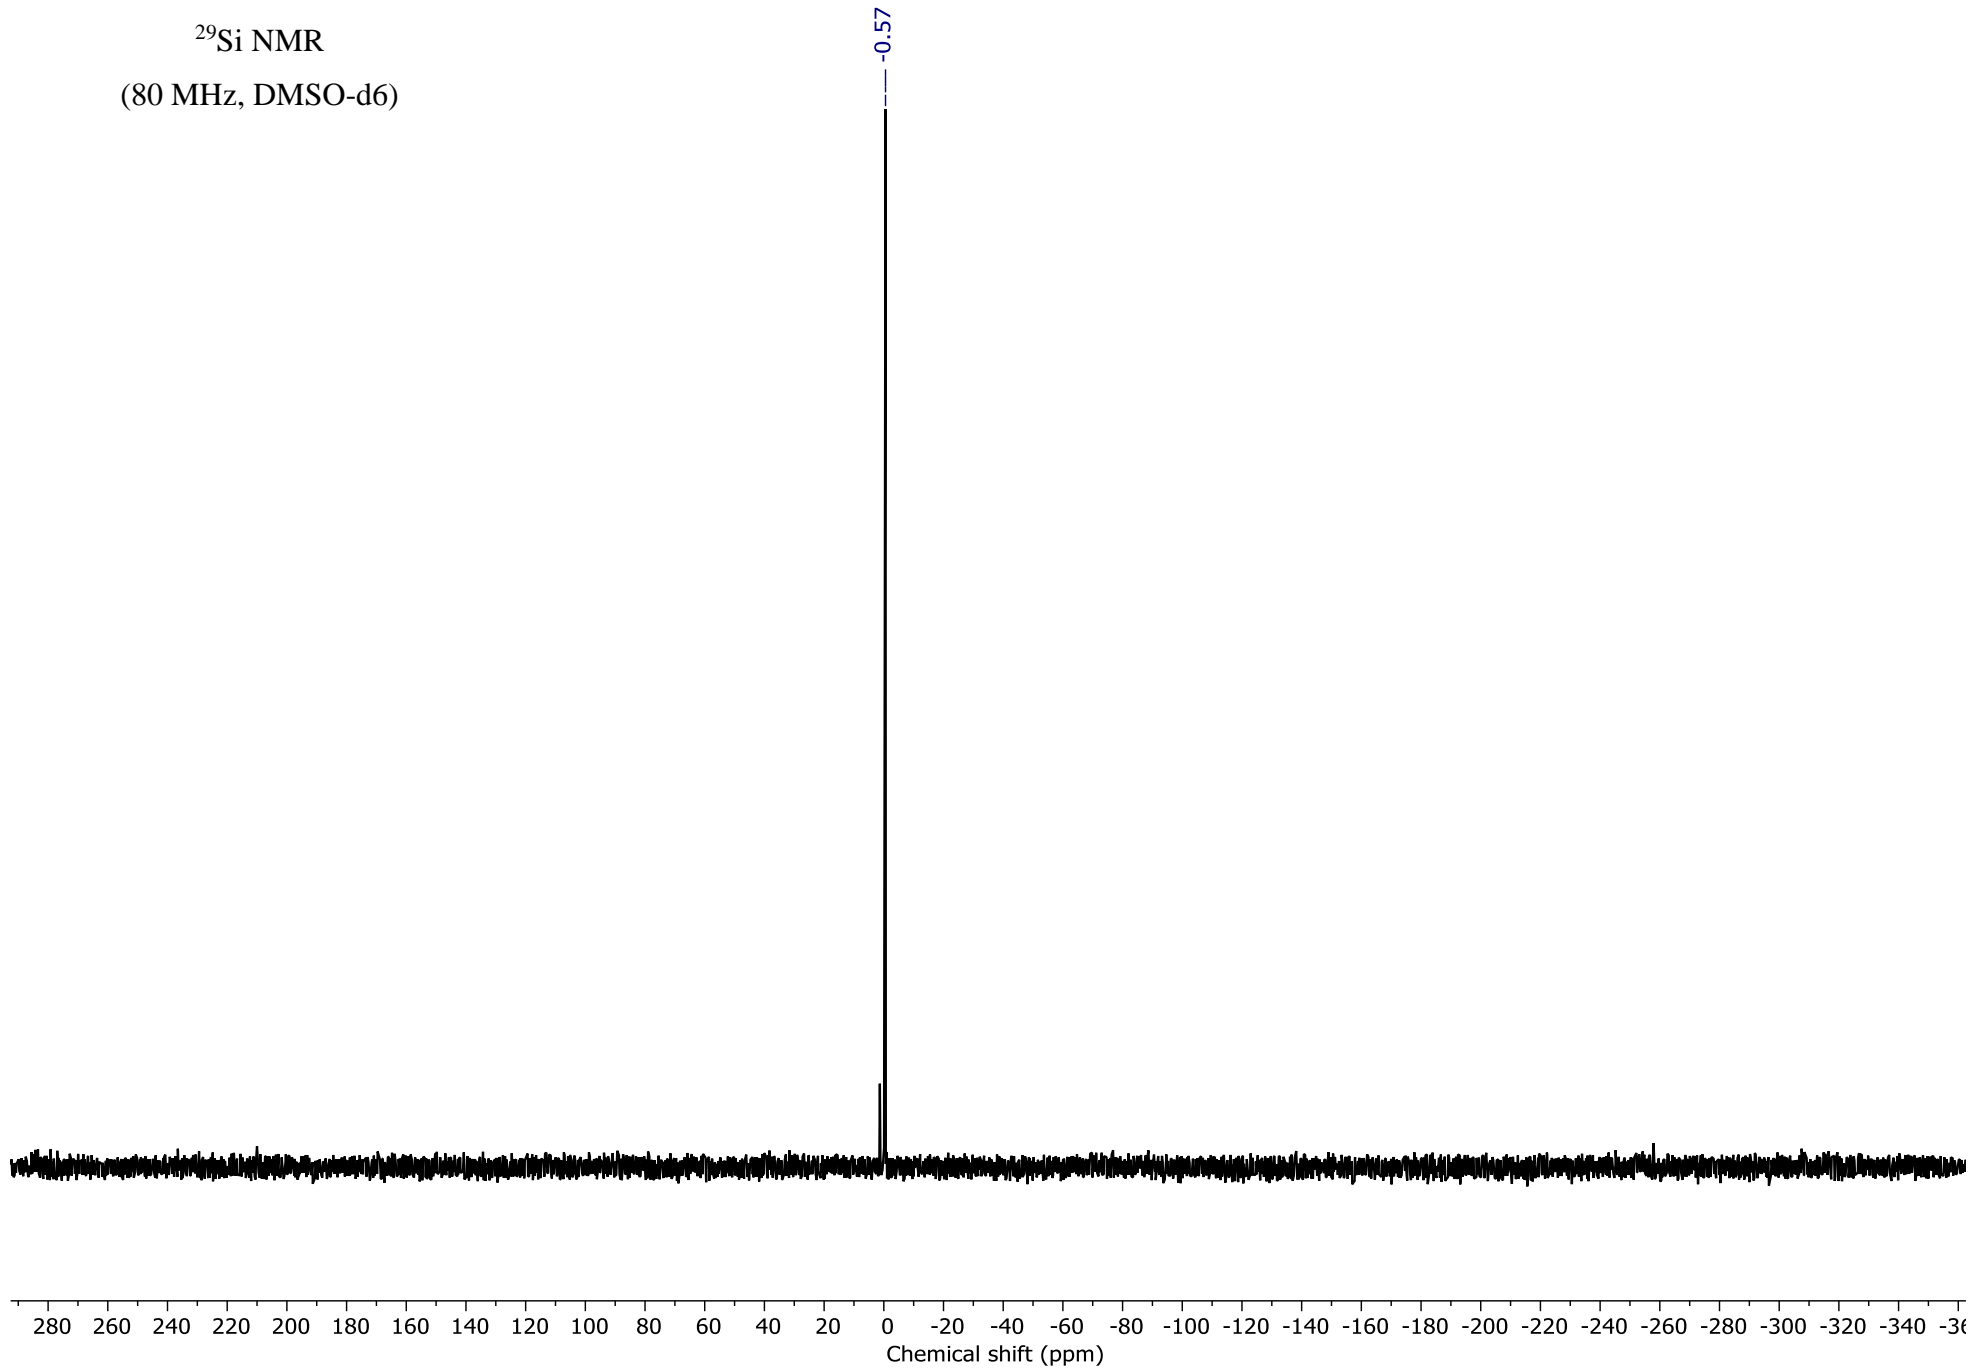

$^{15}\text{N}$  NMR  
(reconstructed, 40 MHz,  
DMSO-d<sub>6</sub>)

S43

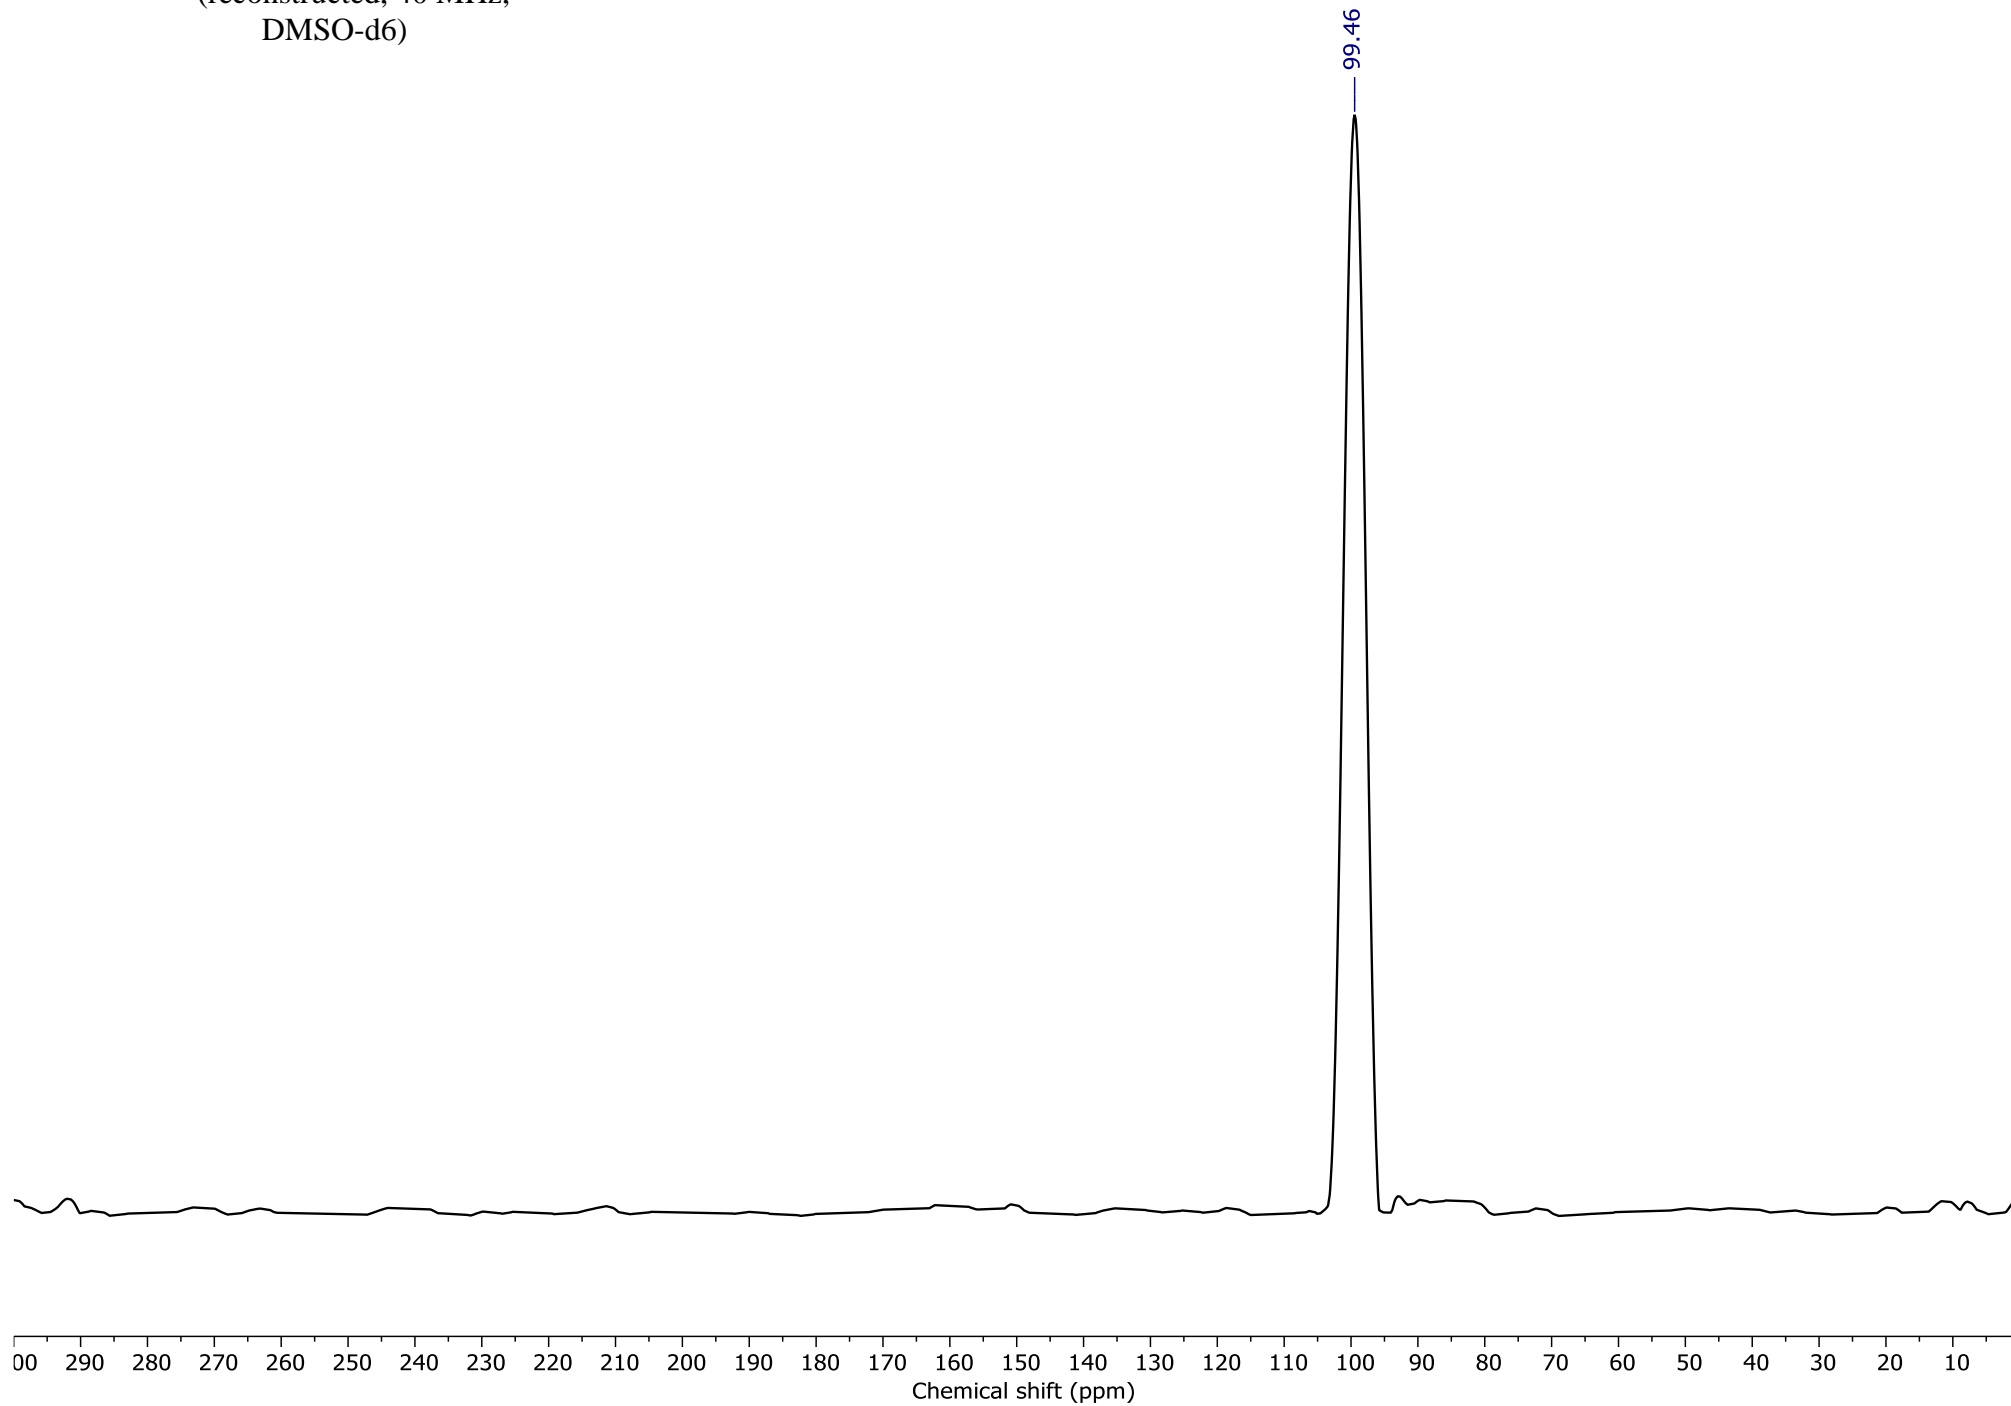

$^1\text{H} - ^{13}\text{C}$  HMBC  
(400 MHz, DMSO-d<sub>6</sub>)

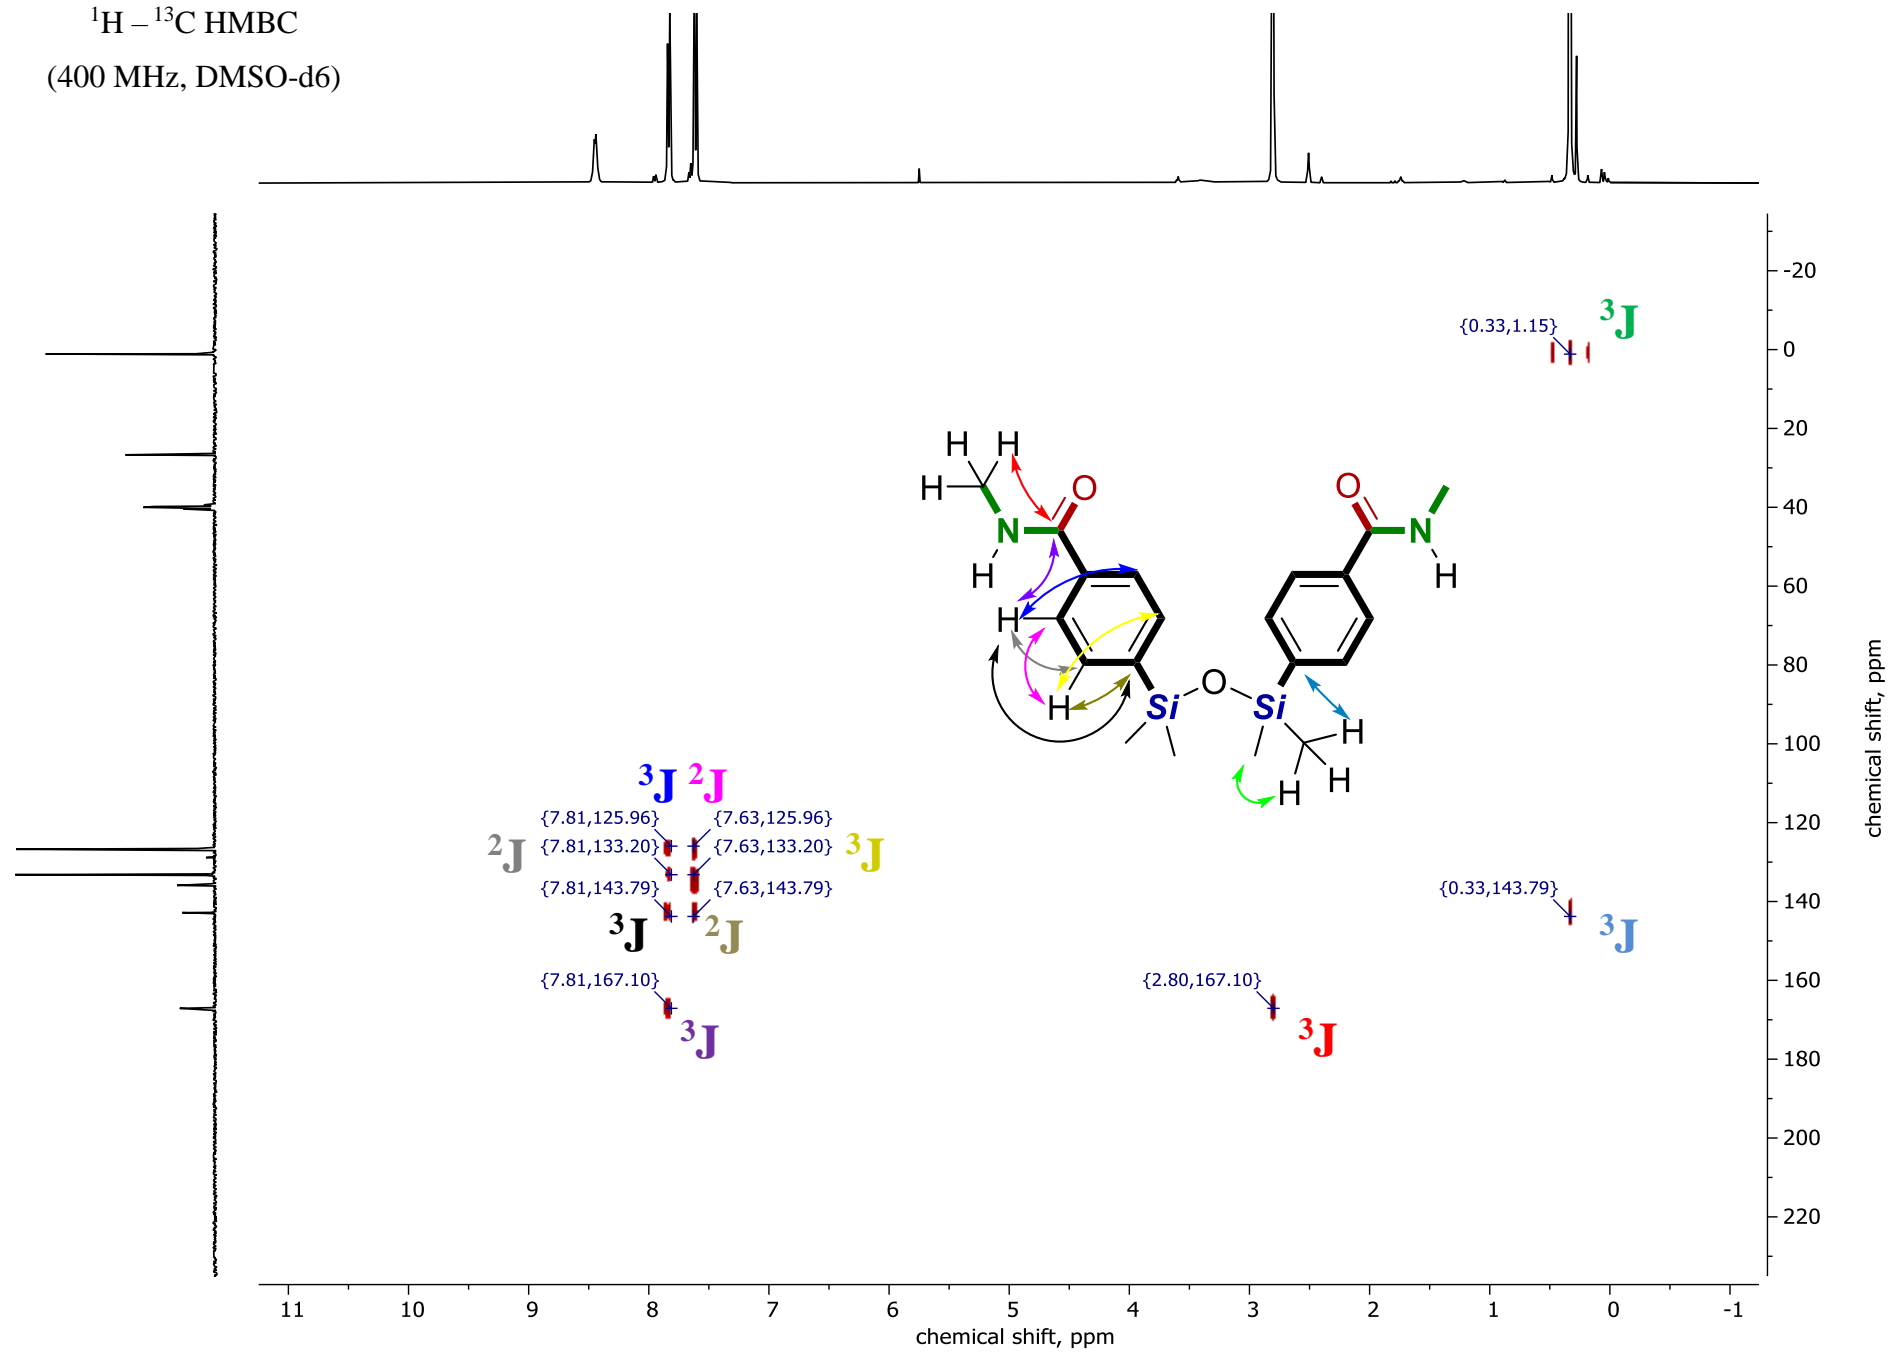

$^1\text{H} - ^{13}\text{C}$  HSQC  
(400 MHz, DMSO-d<sub>6</sub>)

S45

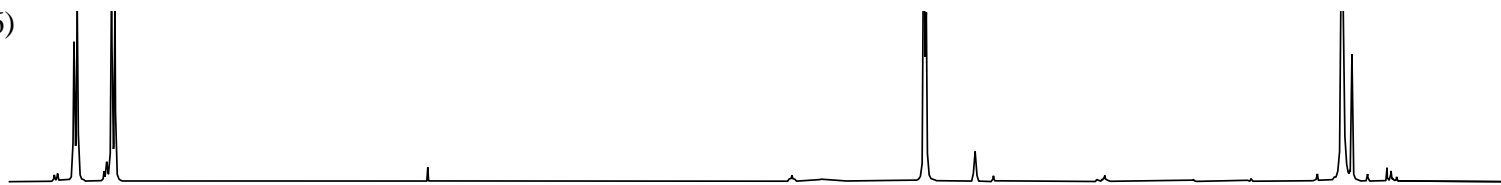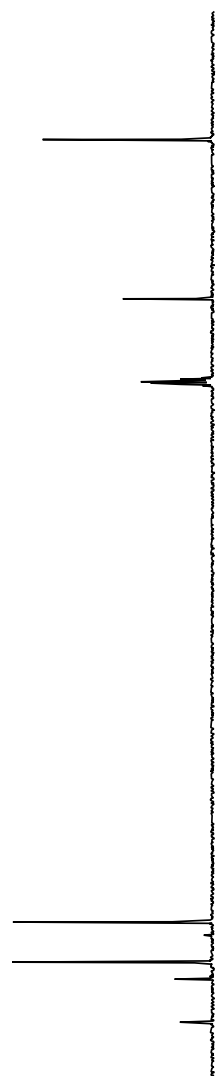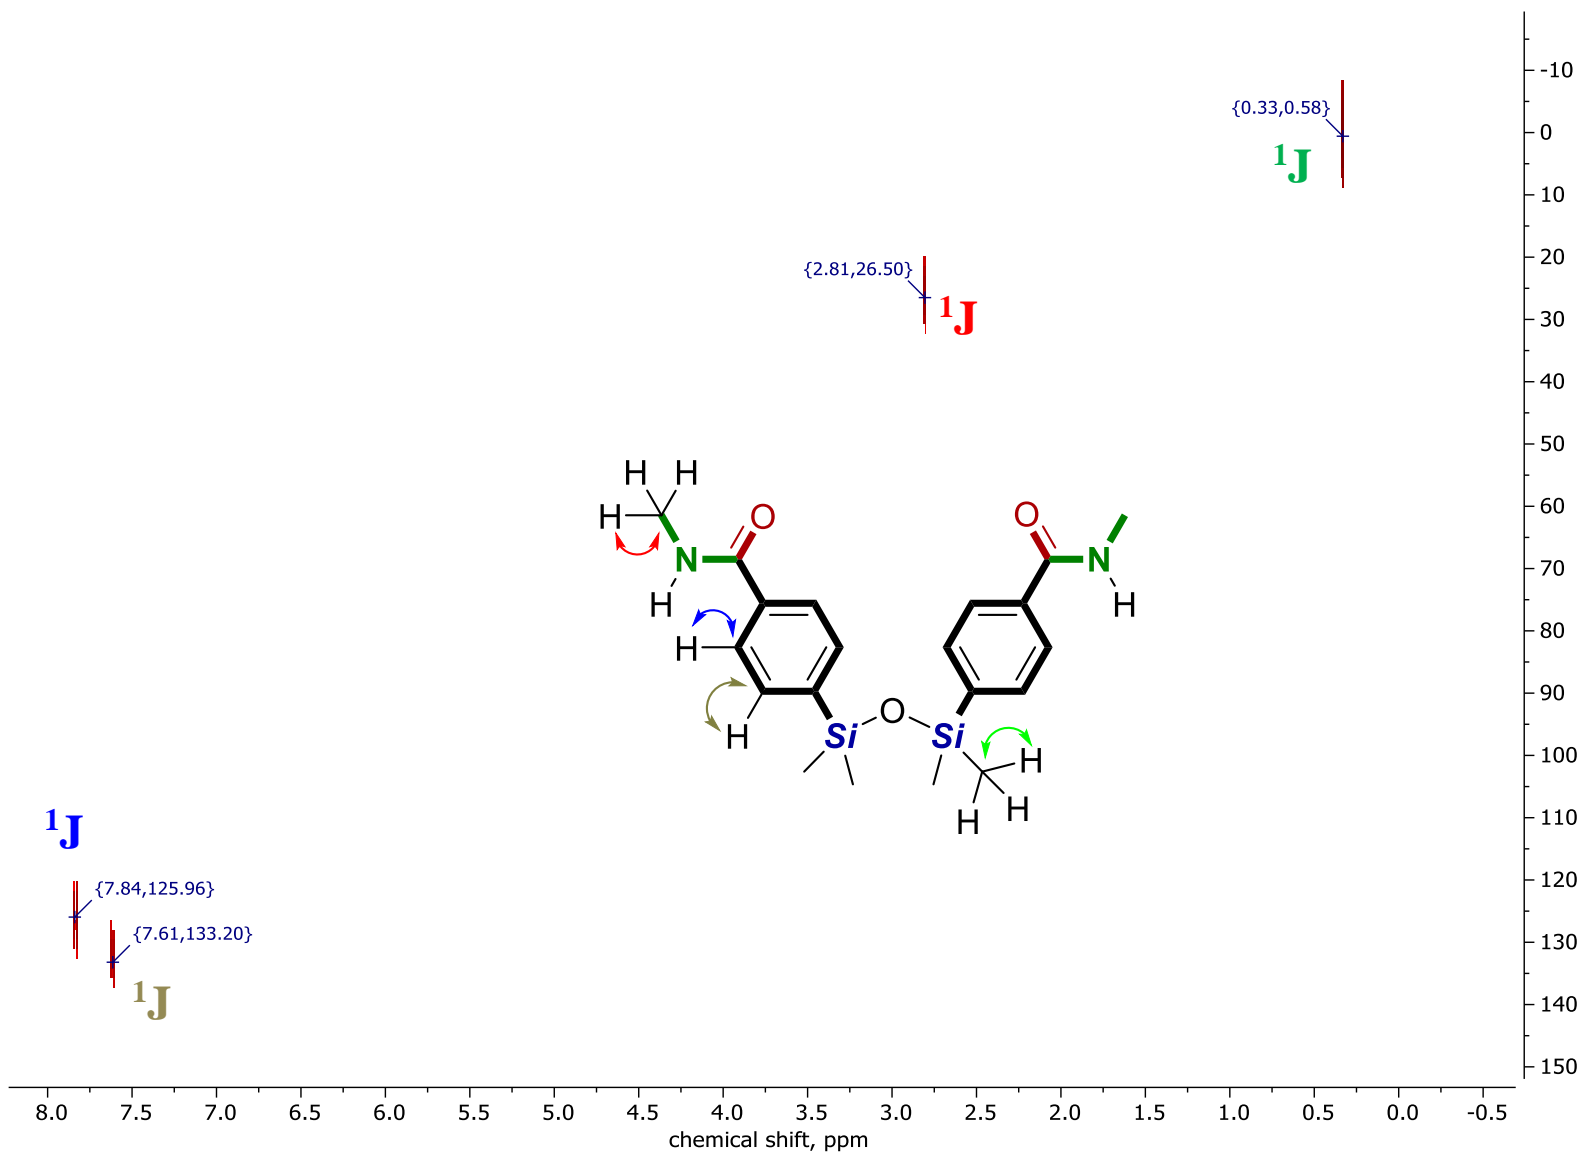

S46

$^1\text{H} - ^{29}\text{Si}$  HMBC  
(400 MHz, DMSO-d<sub>6</sub>)

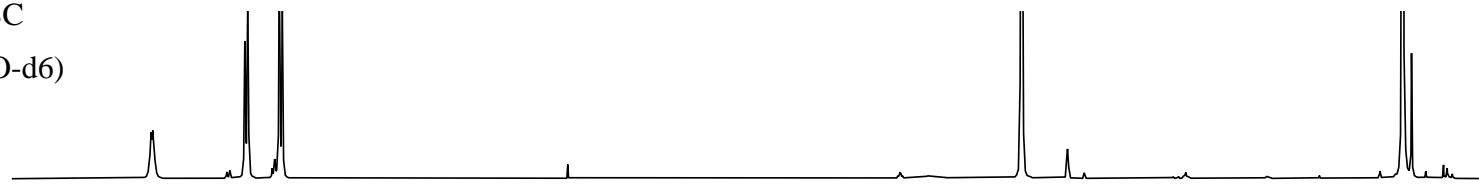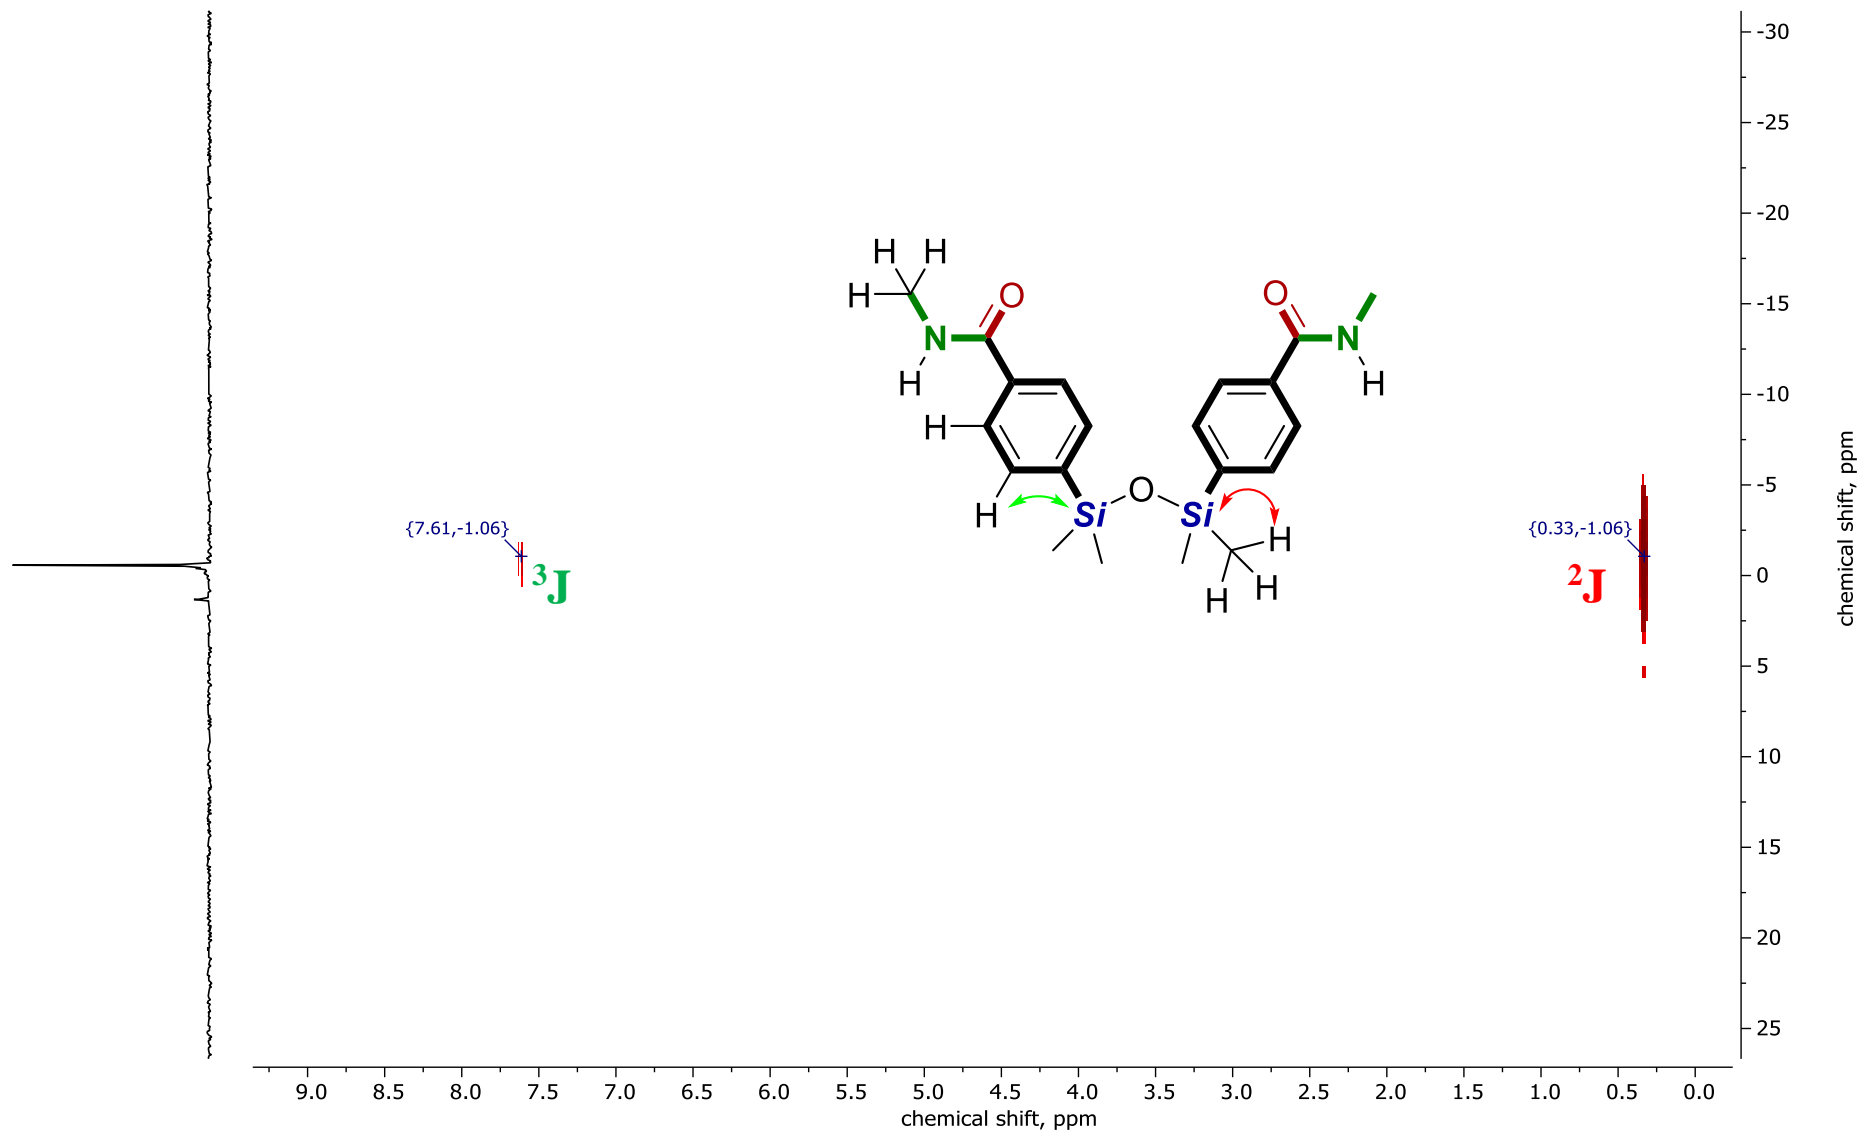

S47

$^1\text{H} - ^{15}\text{N}$  HMBC  
(400 MHz, DMSO-d6)

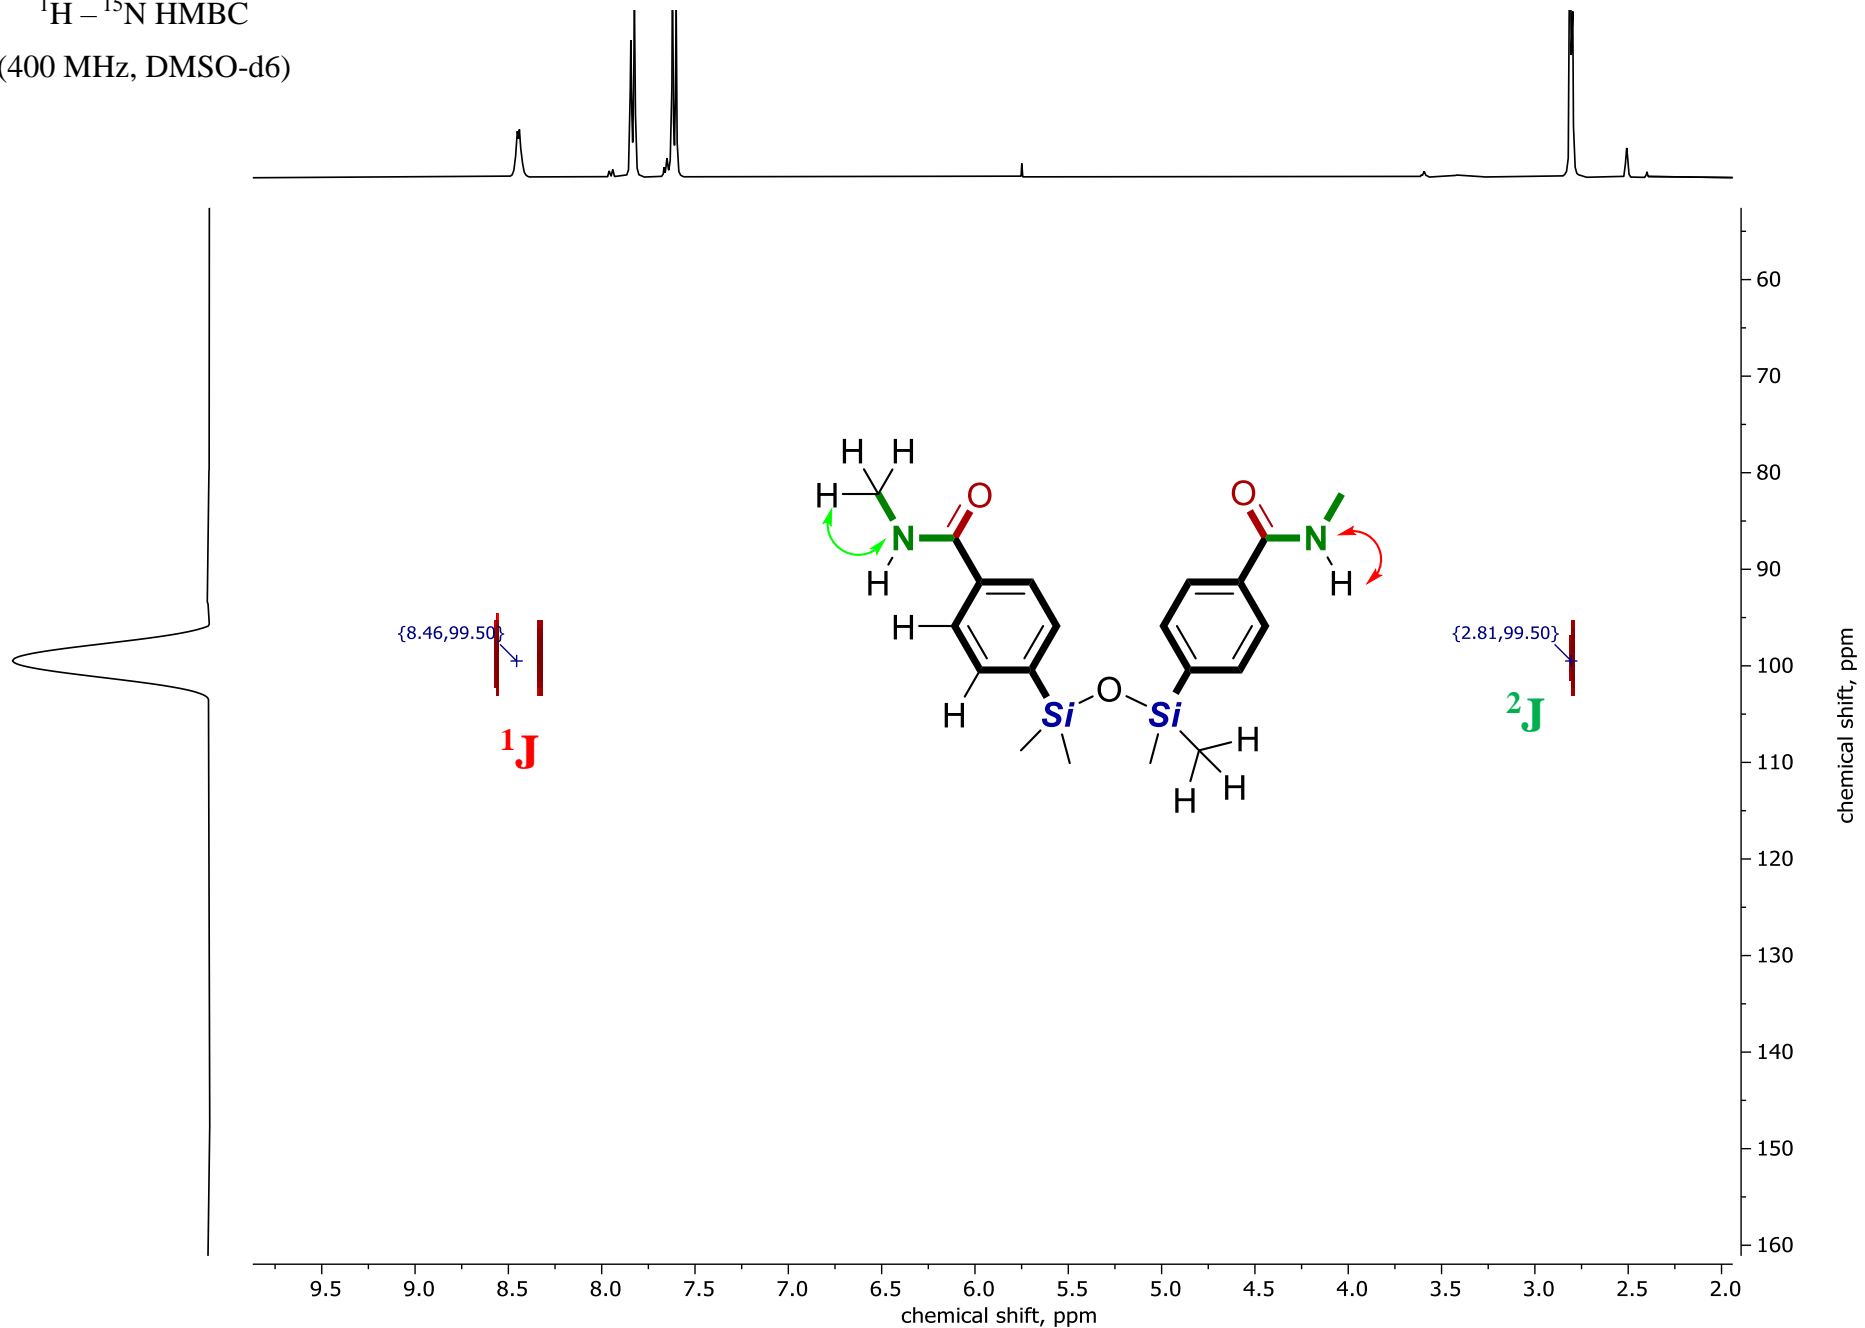

S48

$^1\text{H} - ^{15}\text{N}$  HSQC  
(400 MHz, DMSO-d6)

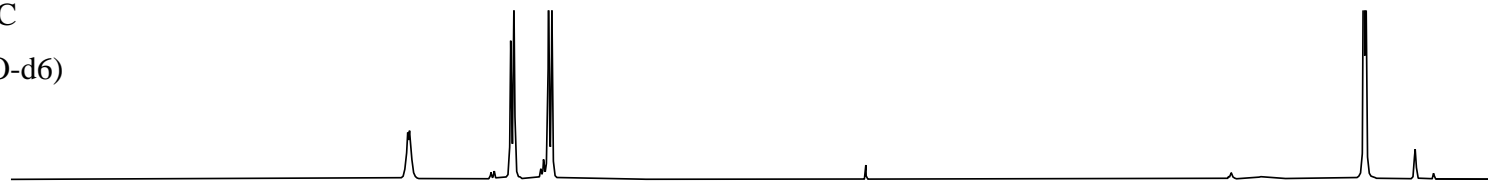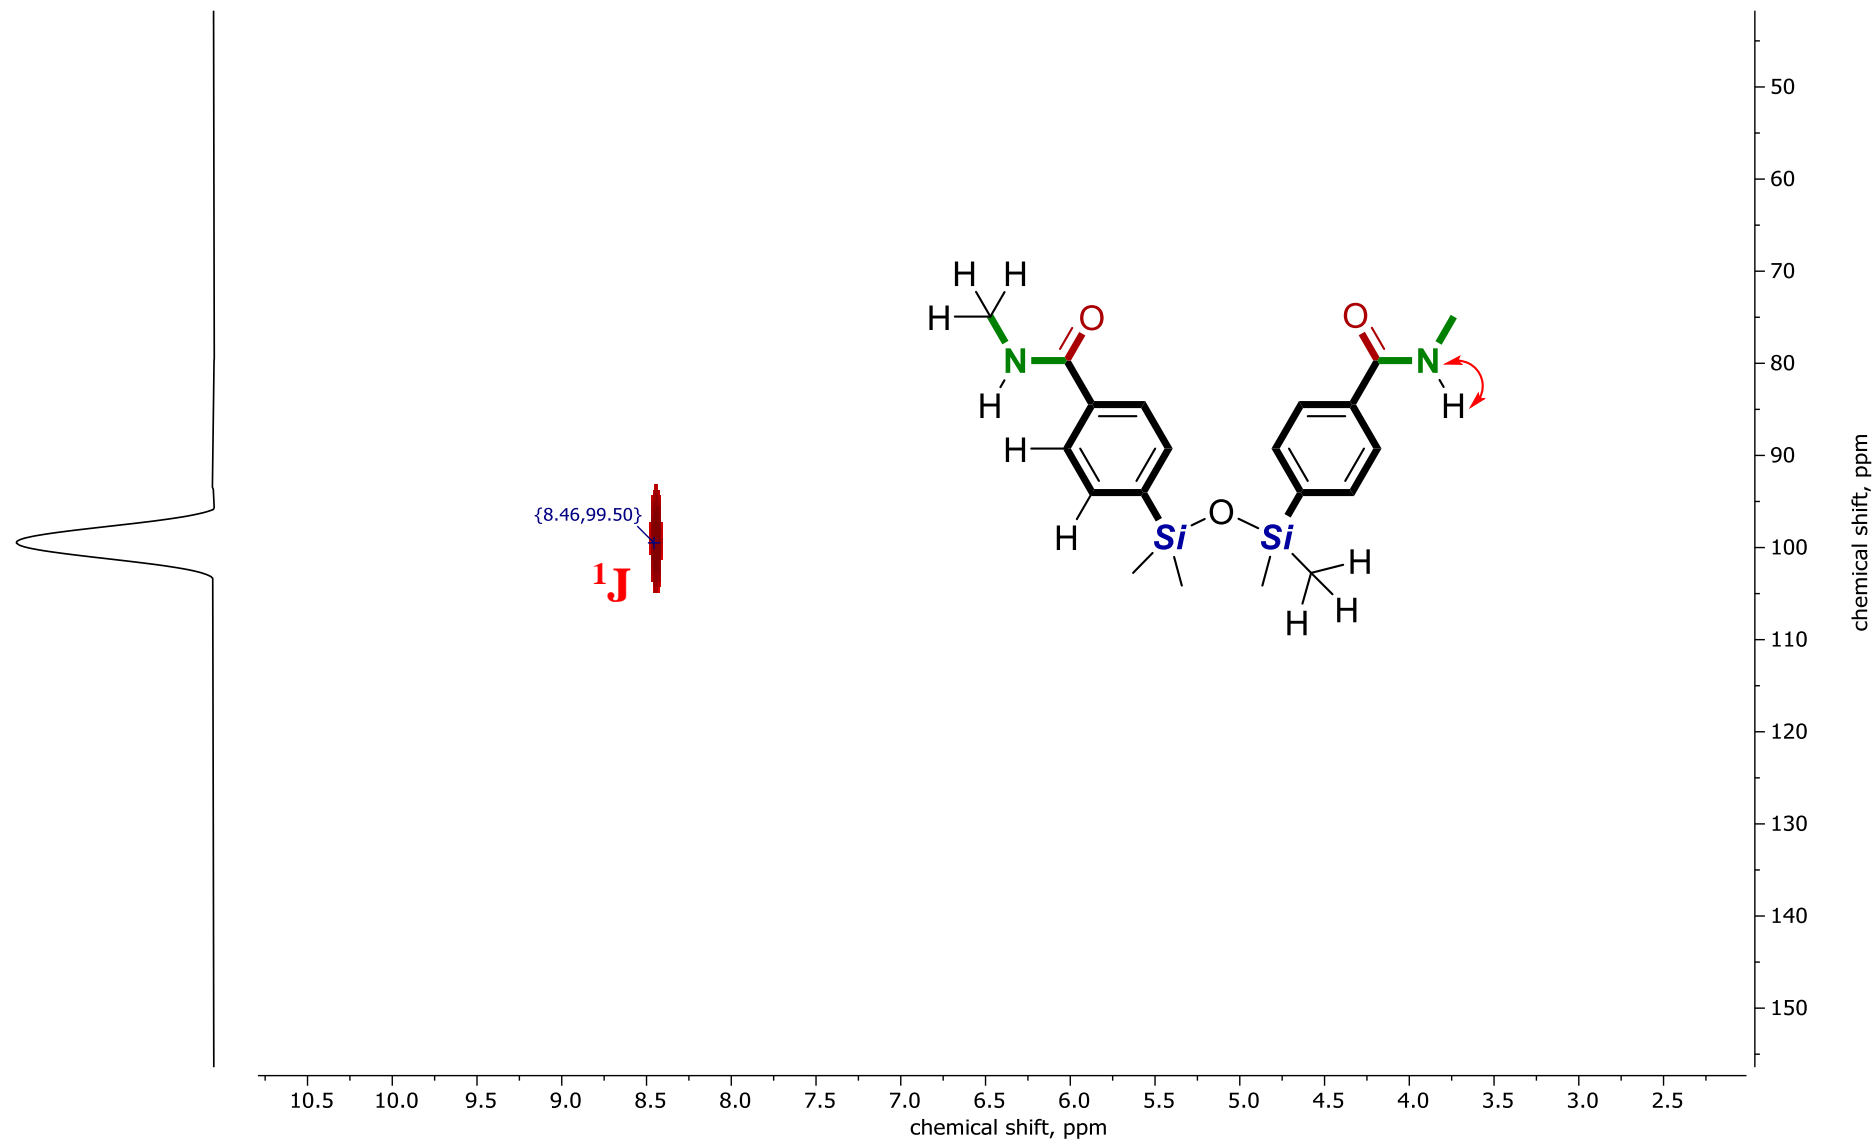



S49

IR-spectrum

— 3325

— 2958

— 1635

— 1545

— 1411

— 1319

— 1254

— 1111

— 1067

— 830

— 791

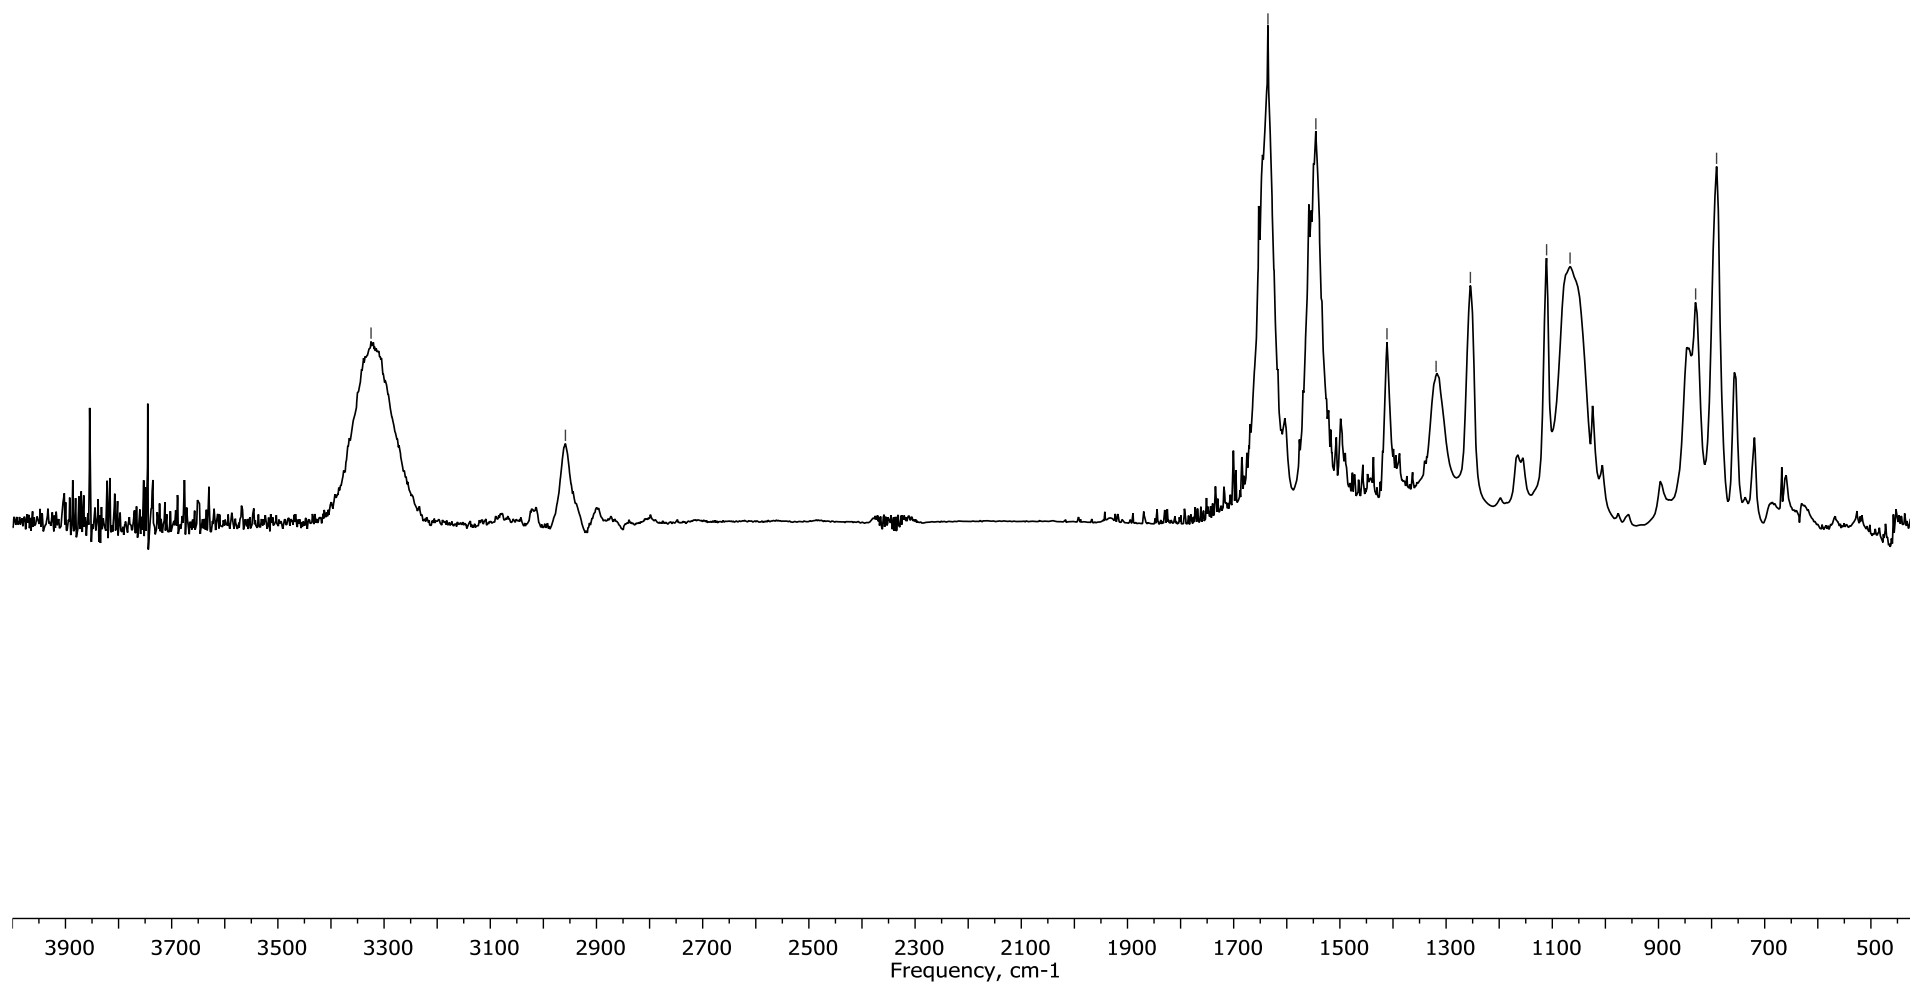

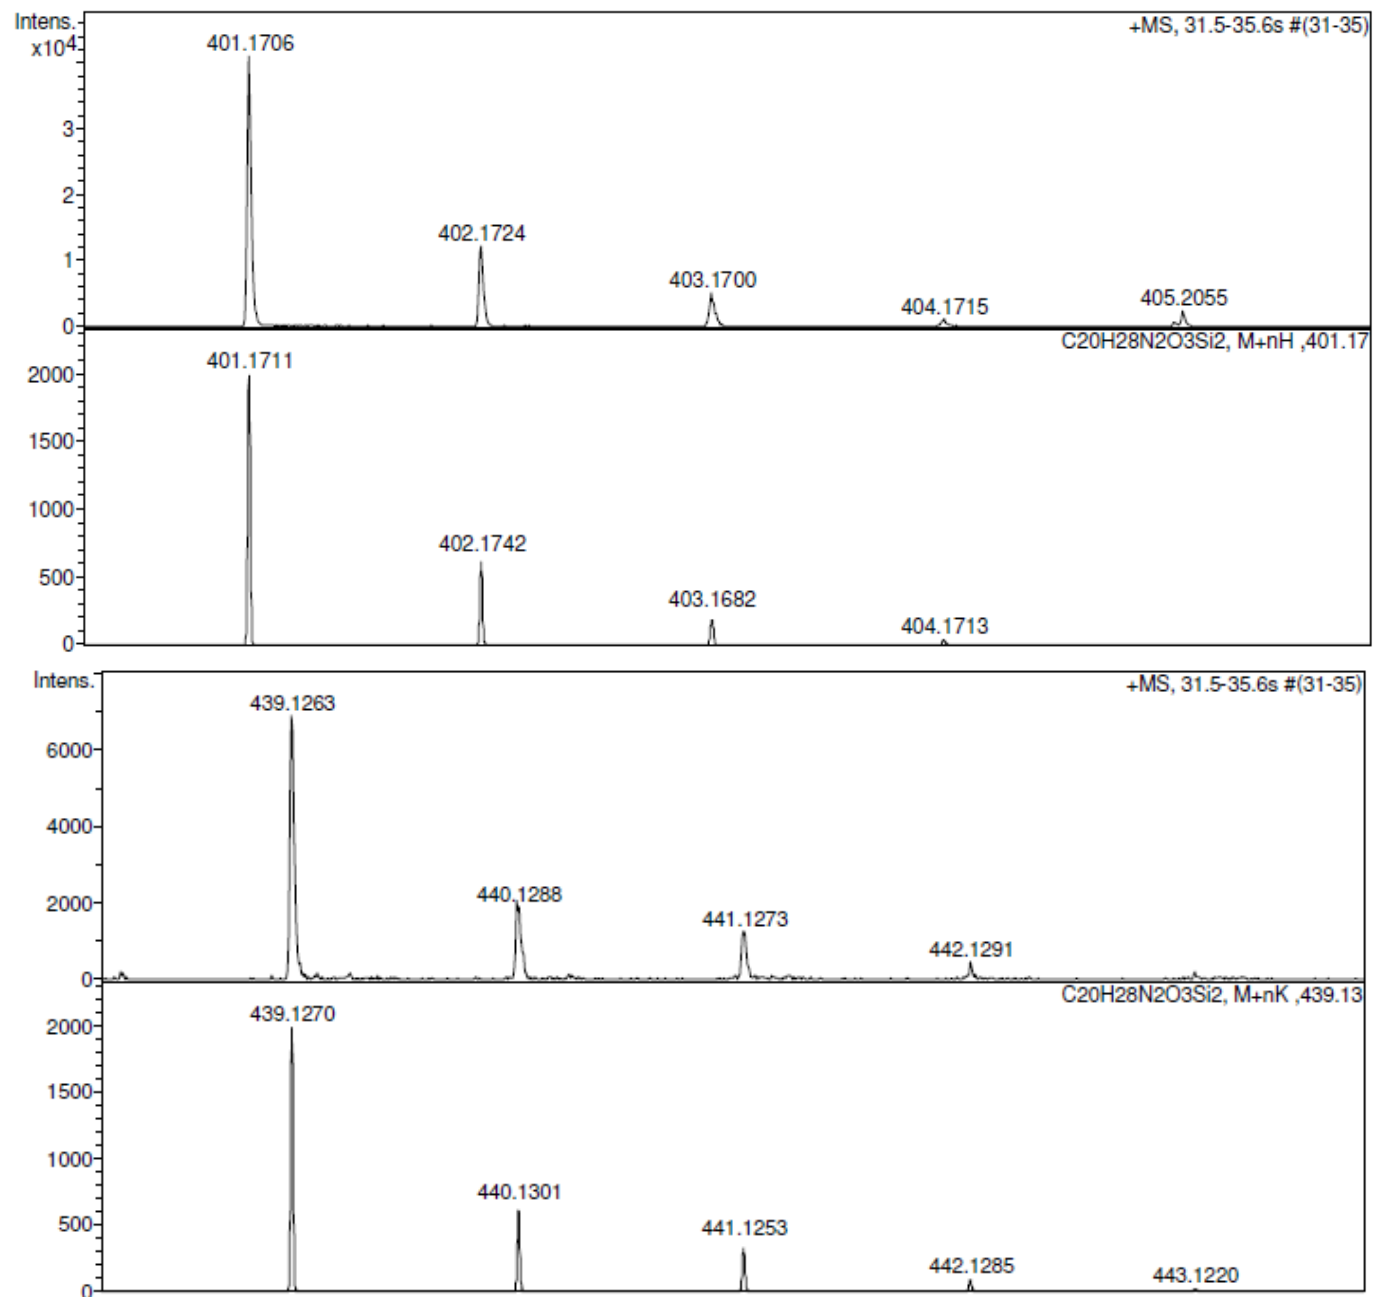

S51

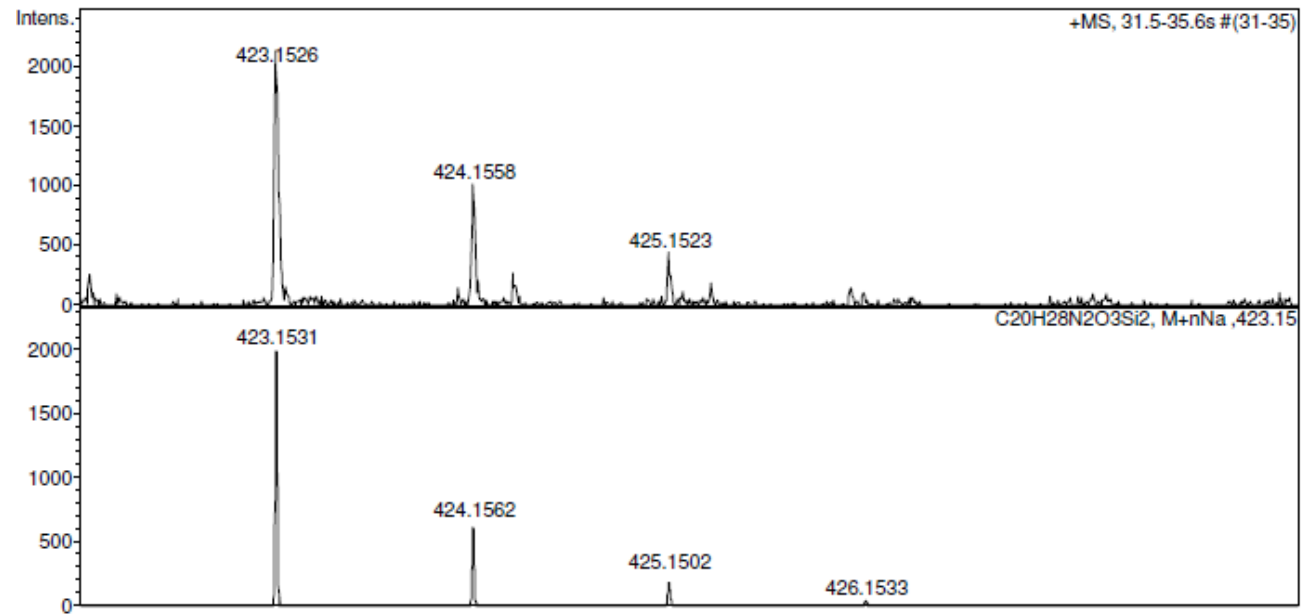

S52

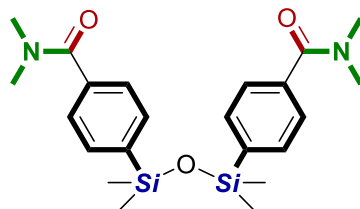

**Characterisation data for 4,4'-(1,1,3,3-tetramethyldisiloxane-1,3-diyl)bis(N,N-dimethylbenzamide):**

$^1\text{H}$  NMR (400 MHz, DMSO- $d_6$ ):  $\delta$  = 7.58 (d,  $^3J$ =8 Hz, 4H);  $\delta$  = 7.37 (d,  $^3J$ =8 Hz, 4H);  $\delta$  = 2.98 (s, 6H);  $\delta$  = 2.88 (s, 6H);  $\delta$  = 0.33 (s, 12H).  $^{13}\text{C}$  NMR (100 MHz, DMSO- $d_6$ ):  $\delta$  = 170.43, 140.82, 137.97, 133.13, 126.60, 35.11, 1.44.  $^{29}\text{Si}$  NMR (80 MHz, DMSO- $d_6$ ):  $\delta$  = -0.61.  $^{15}\text{N}$  NMR (40 MHz, DMSO- $d_6$ ):  $\delta$  = HRMS (ESI)  $m/z$   $[\text{M} + \text{H}]^+$ : calcd for  $[\text{C}_{22}\text{H}_{32}\text{N}_2\text{O}_3\text{Si}_2 + \text{H}]^+$ , 429.2024; found, 429.2024;  $[\text{M} + \text{Na}]^+$ : calcd for  $[\text{C}_{22}\text{H}_{32}\text{N}_2\text{O}_3\text{Si}_2 + \text{Na}]^+$ , 451.1844; found, 451.1840;  $[\text{M} + \text{K}]^+$ : calcd for  $[\text{C}_{22}\text{H}_{32}\text{N}_2\text{O}_3\text{Si}_2 + \text{K}]^+$ , 467.158; found, 467.1588. IR ( $\text{cm}^{-1}$ ): 2955, 1628, 1507-1398, 1254, 1074, 833, 790.

<sup>1</sup>H NMR

(400 MHz, DMSO-d6)

S53

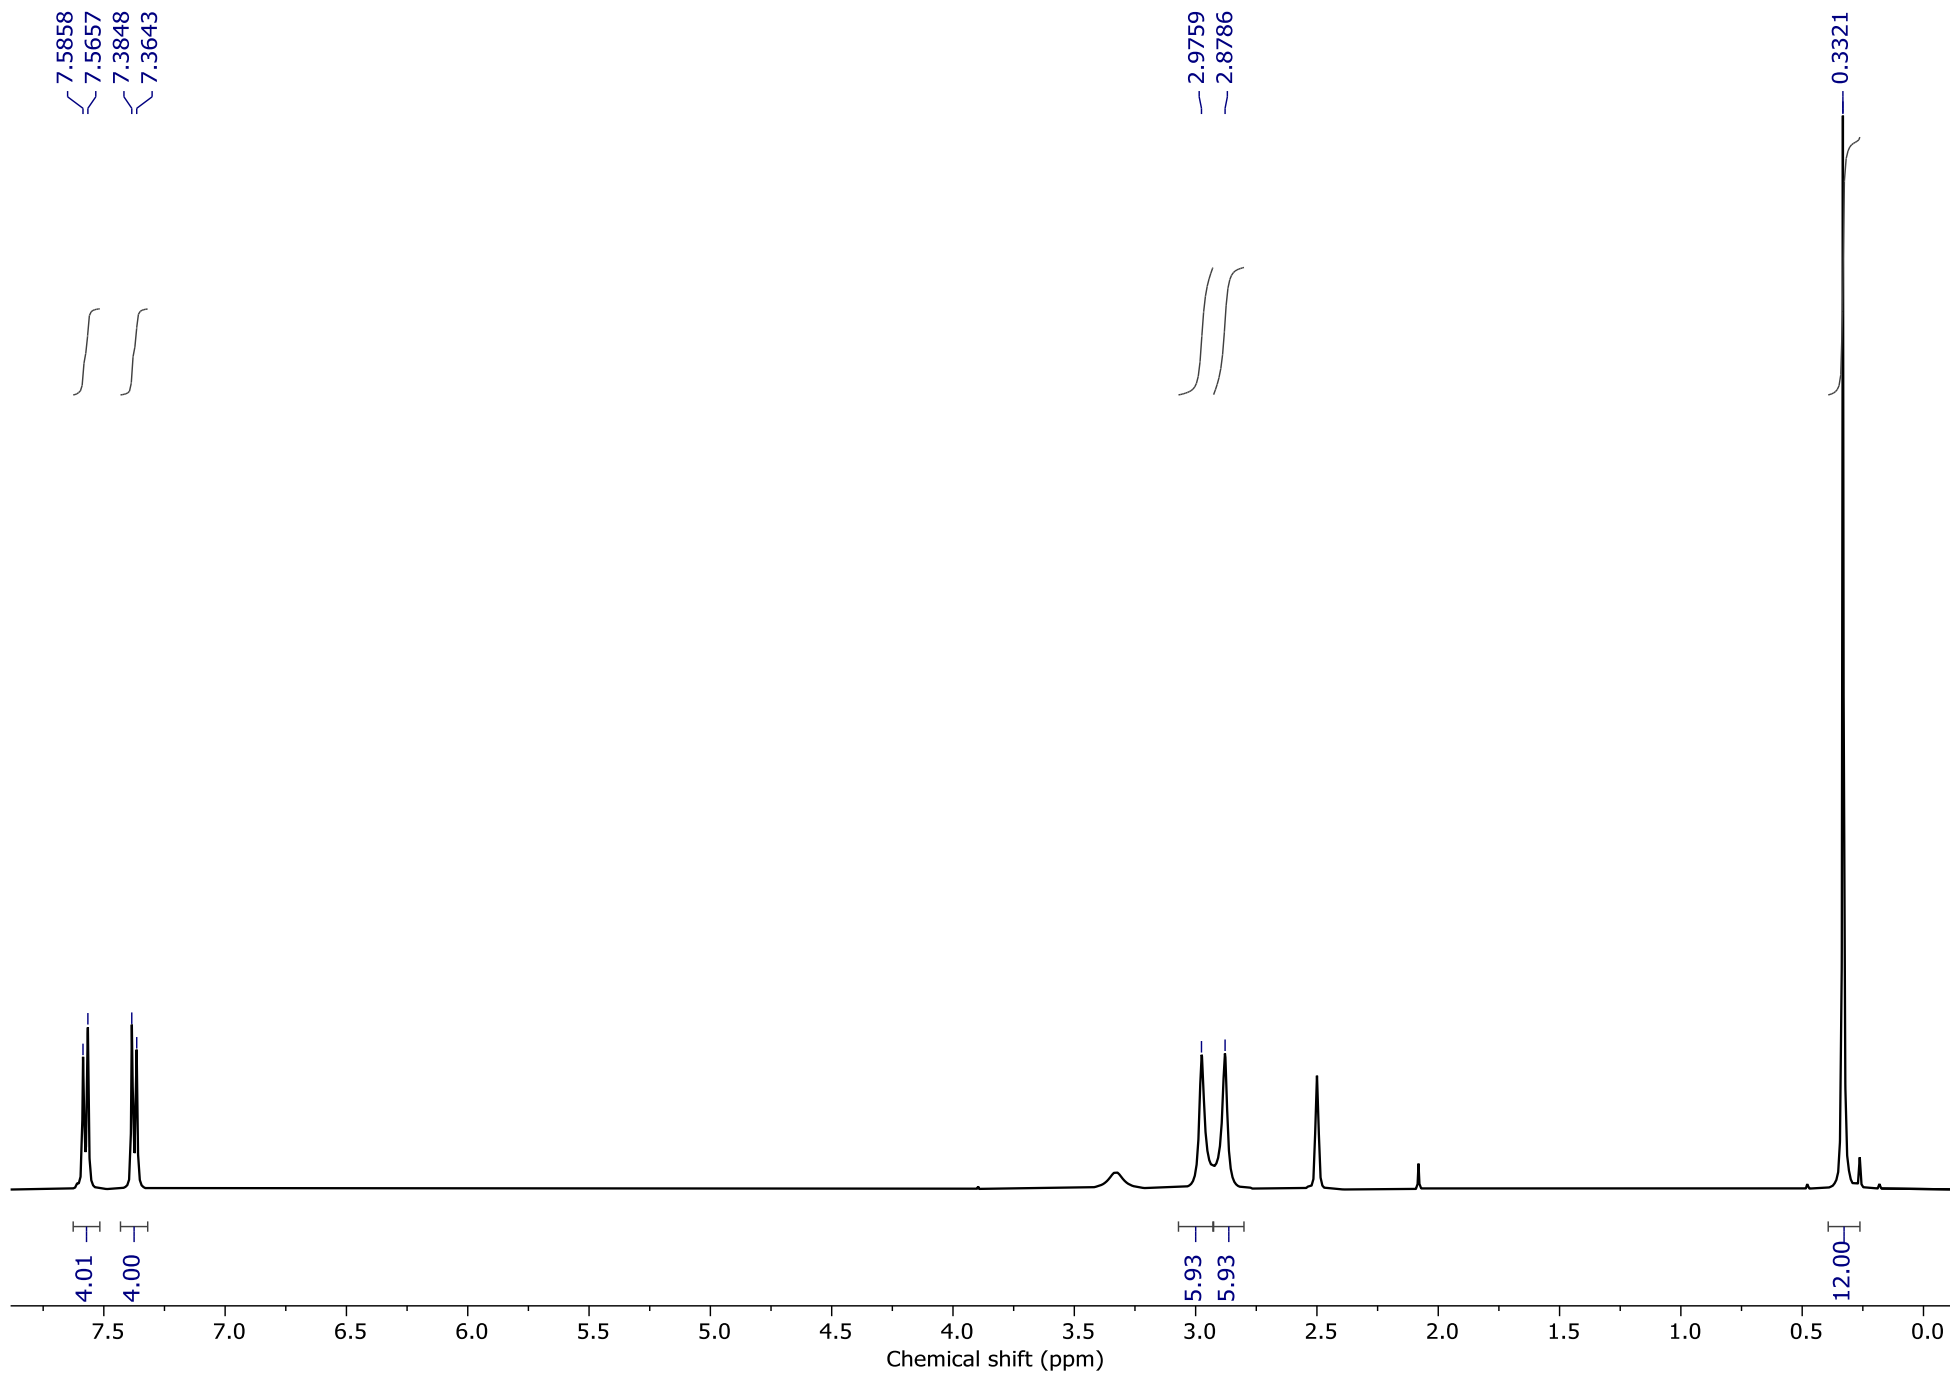

<sup>13</sup>C NMR

(100 MHz, DMSO-d6)

S54

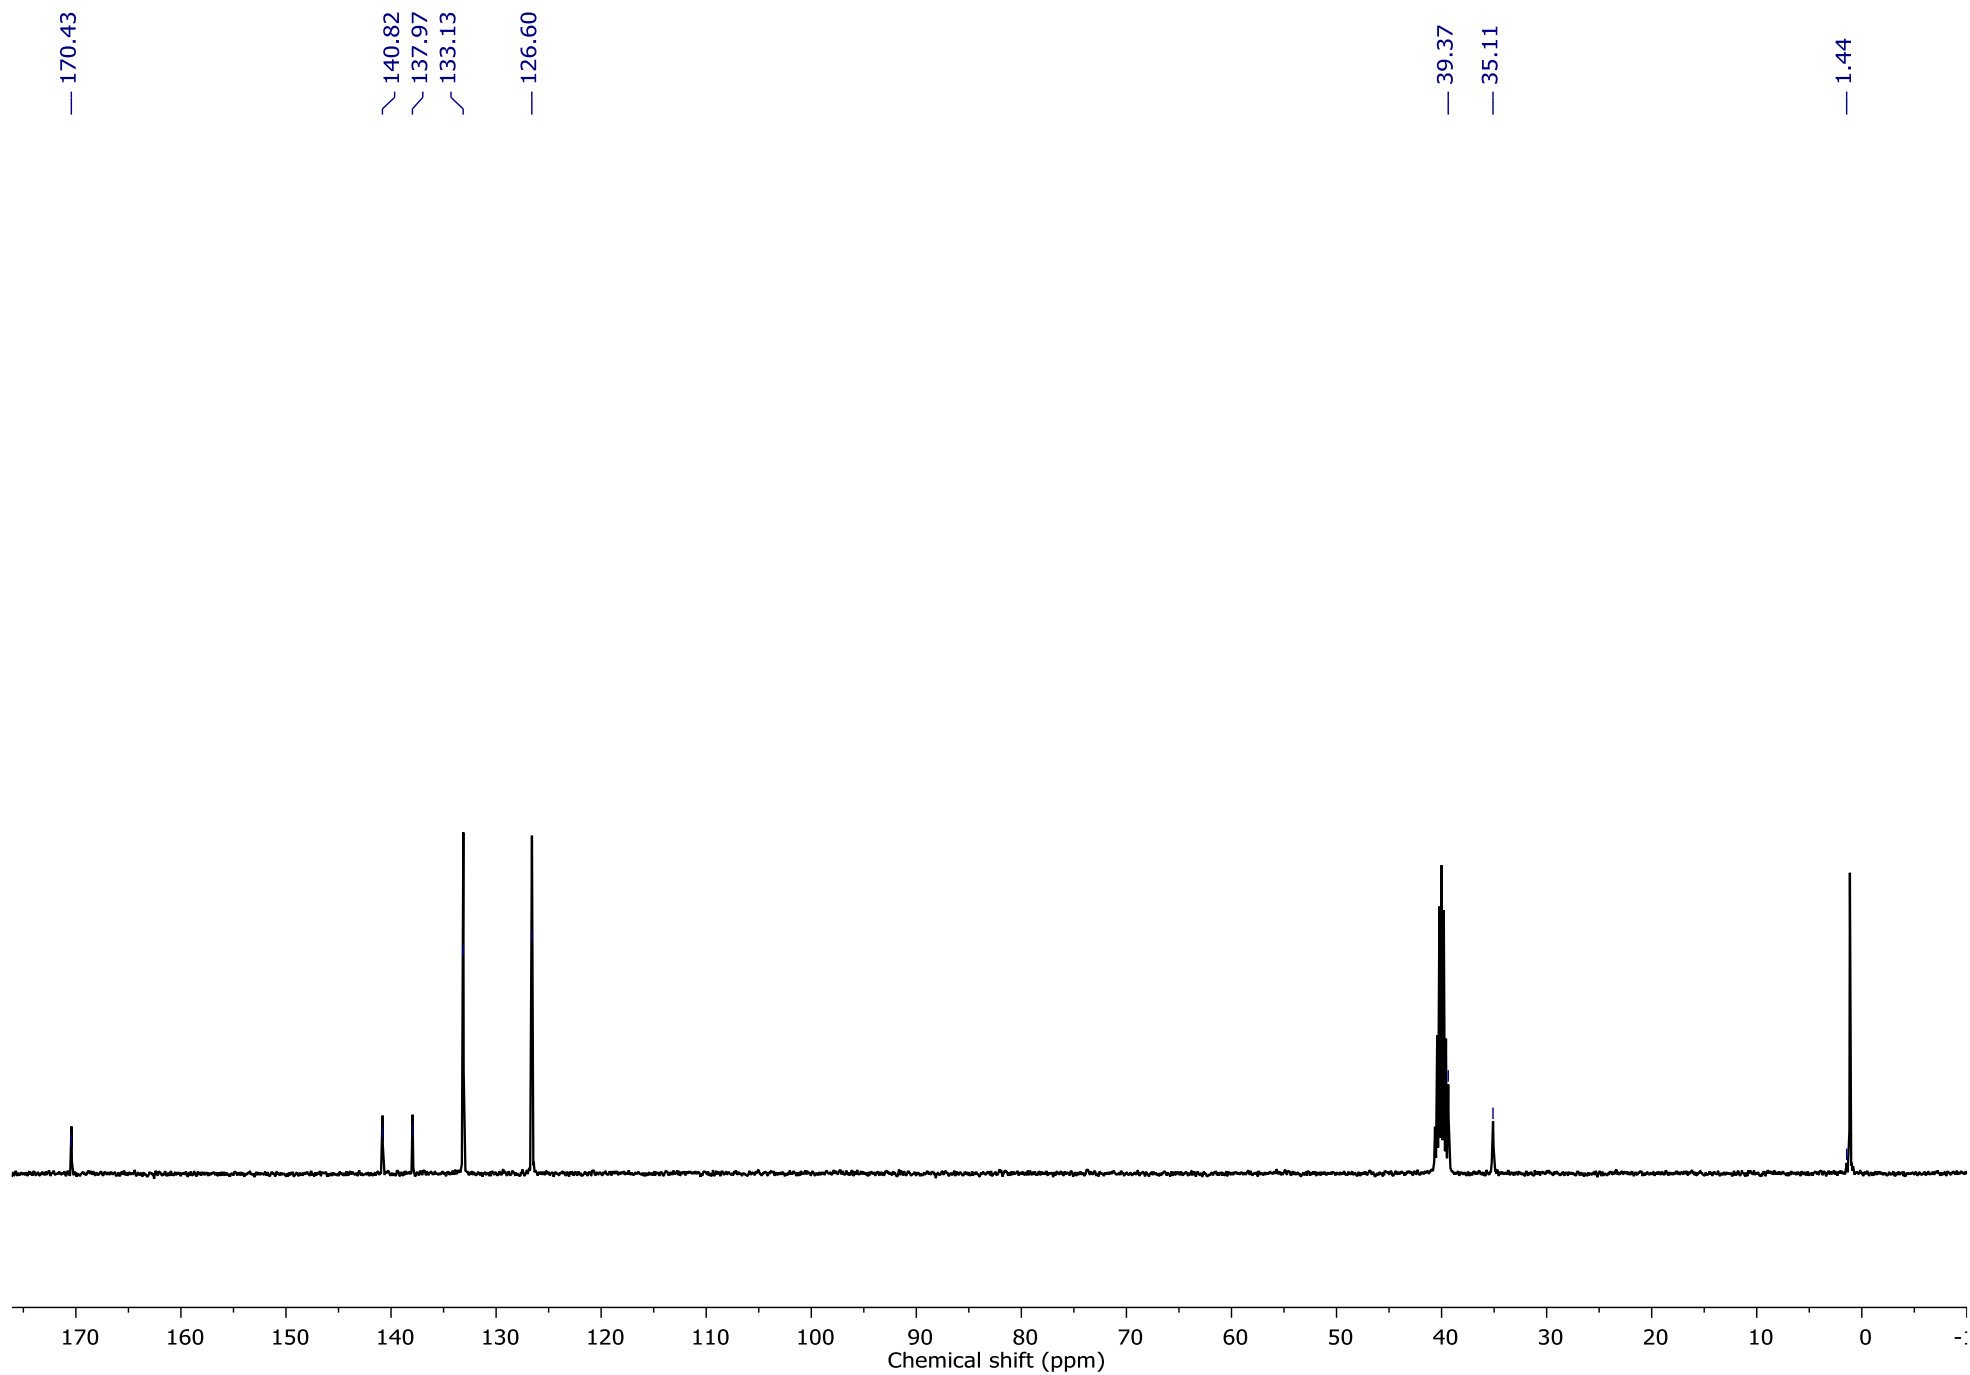

$^{29}\text{Si}$  NMR  
(80 MHz, DMSO-d6)

S55

-0.61

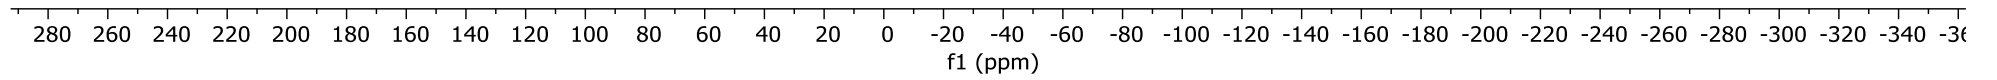

$^1\text{H} - ^{13}\text{C}$  HSQC  
(400 MHz, DMSO-d<sub>6</sub>)

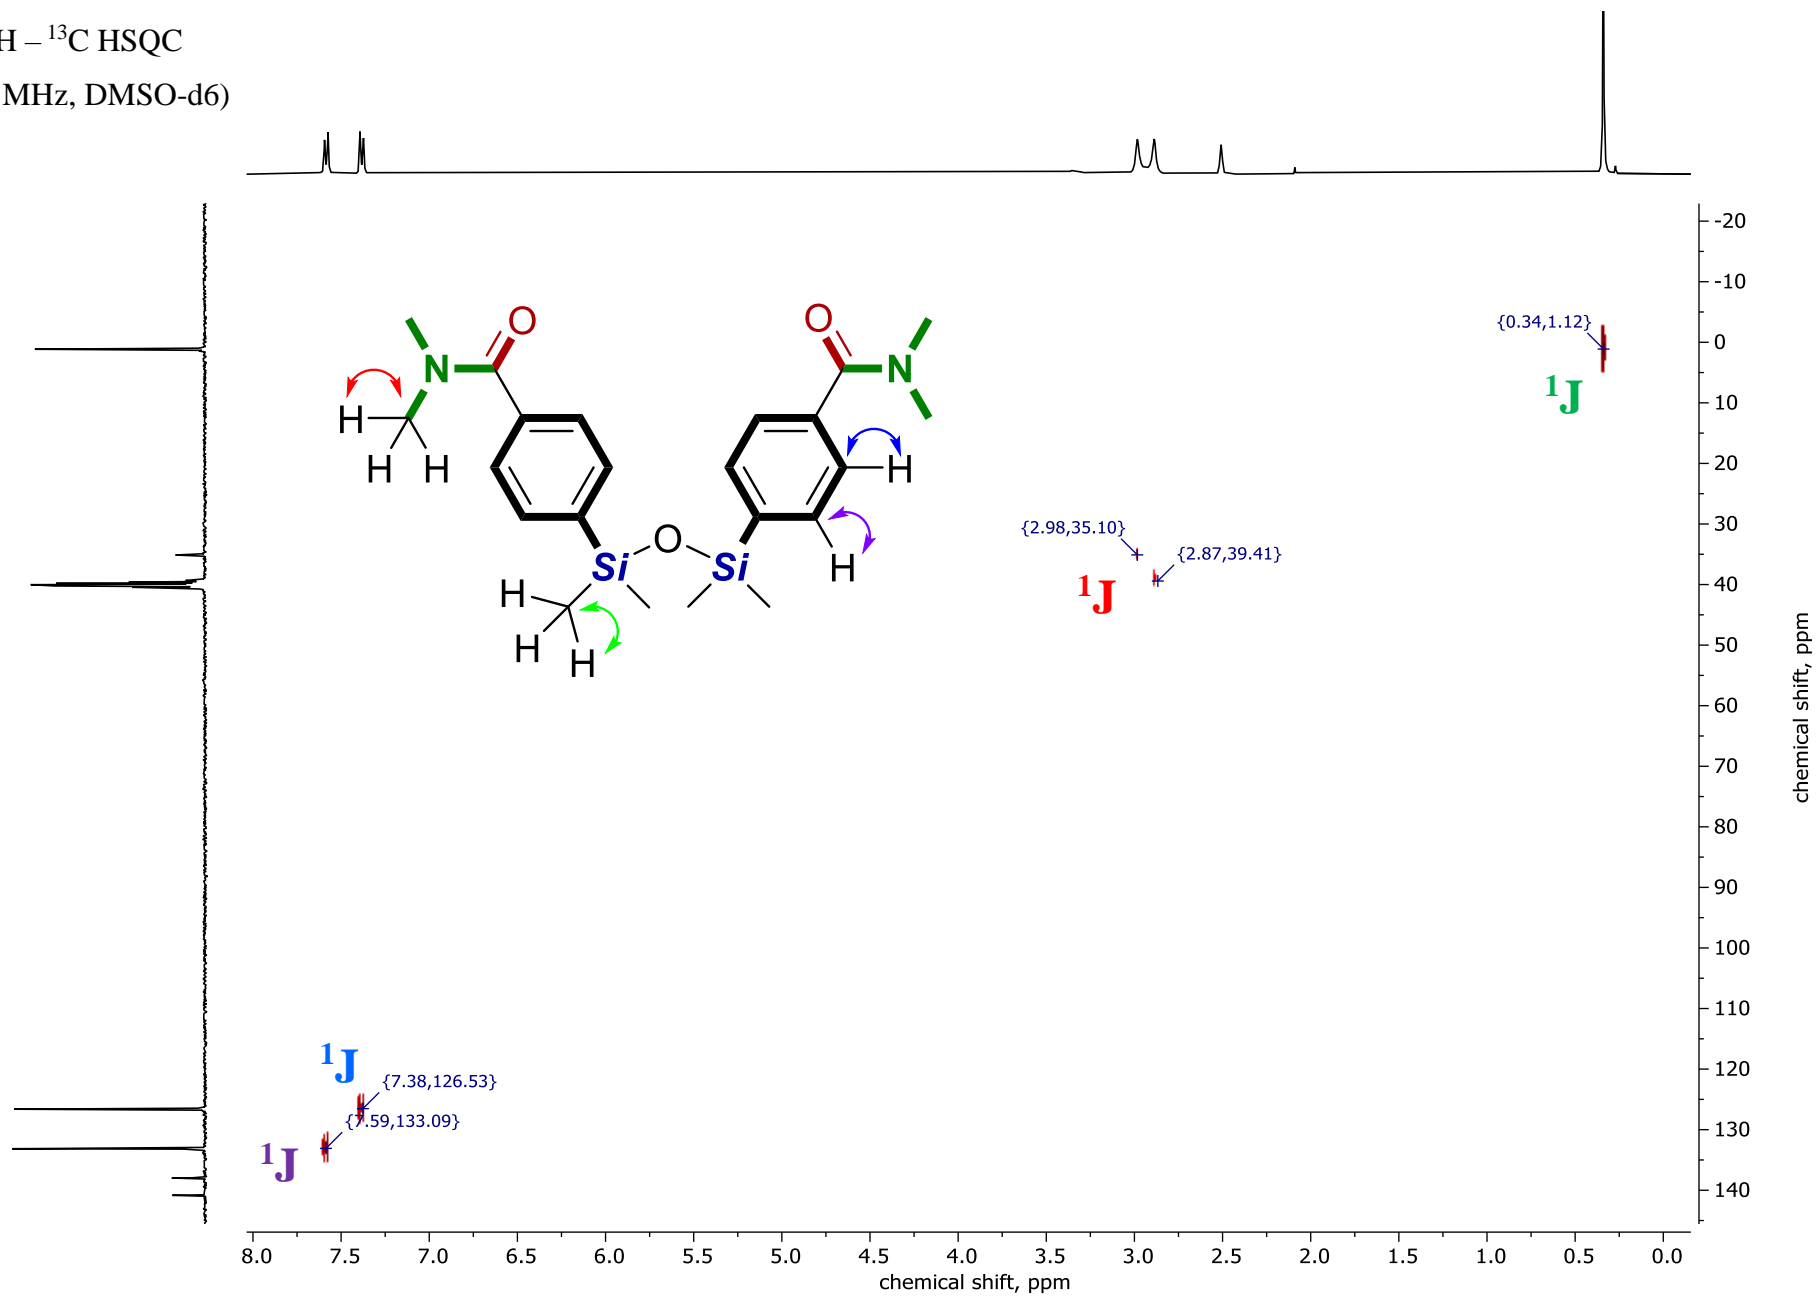



$^1\text{H} - ^{13}\text{C}$  HMBC  
(400 MHz, DMSO-d6)

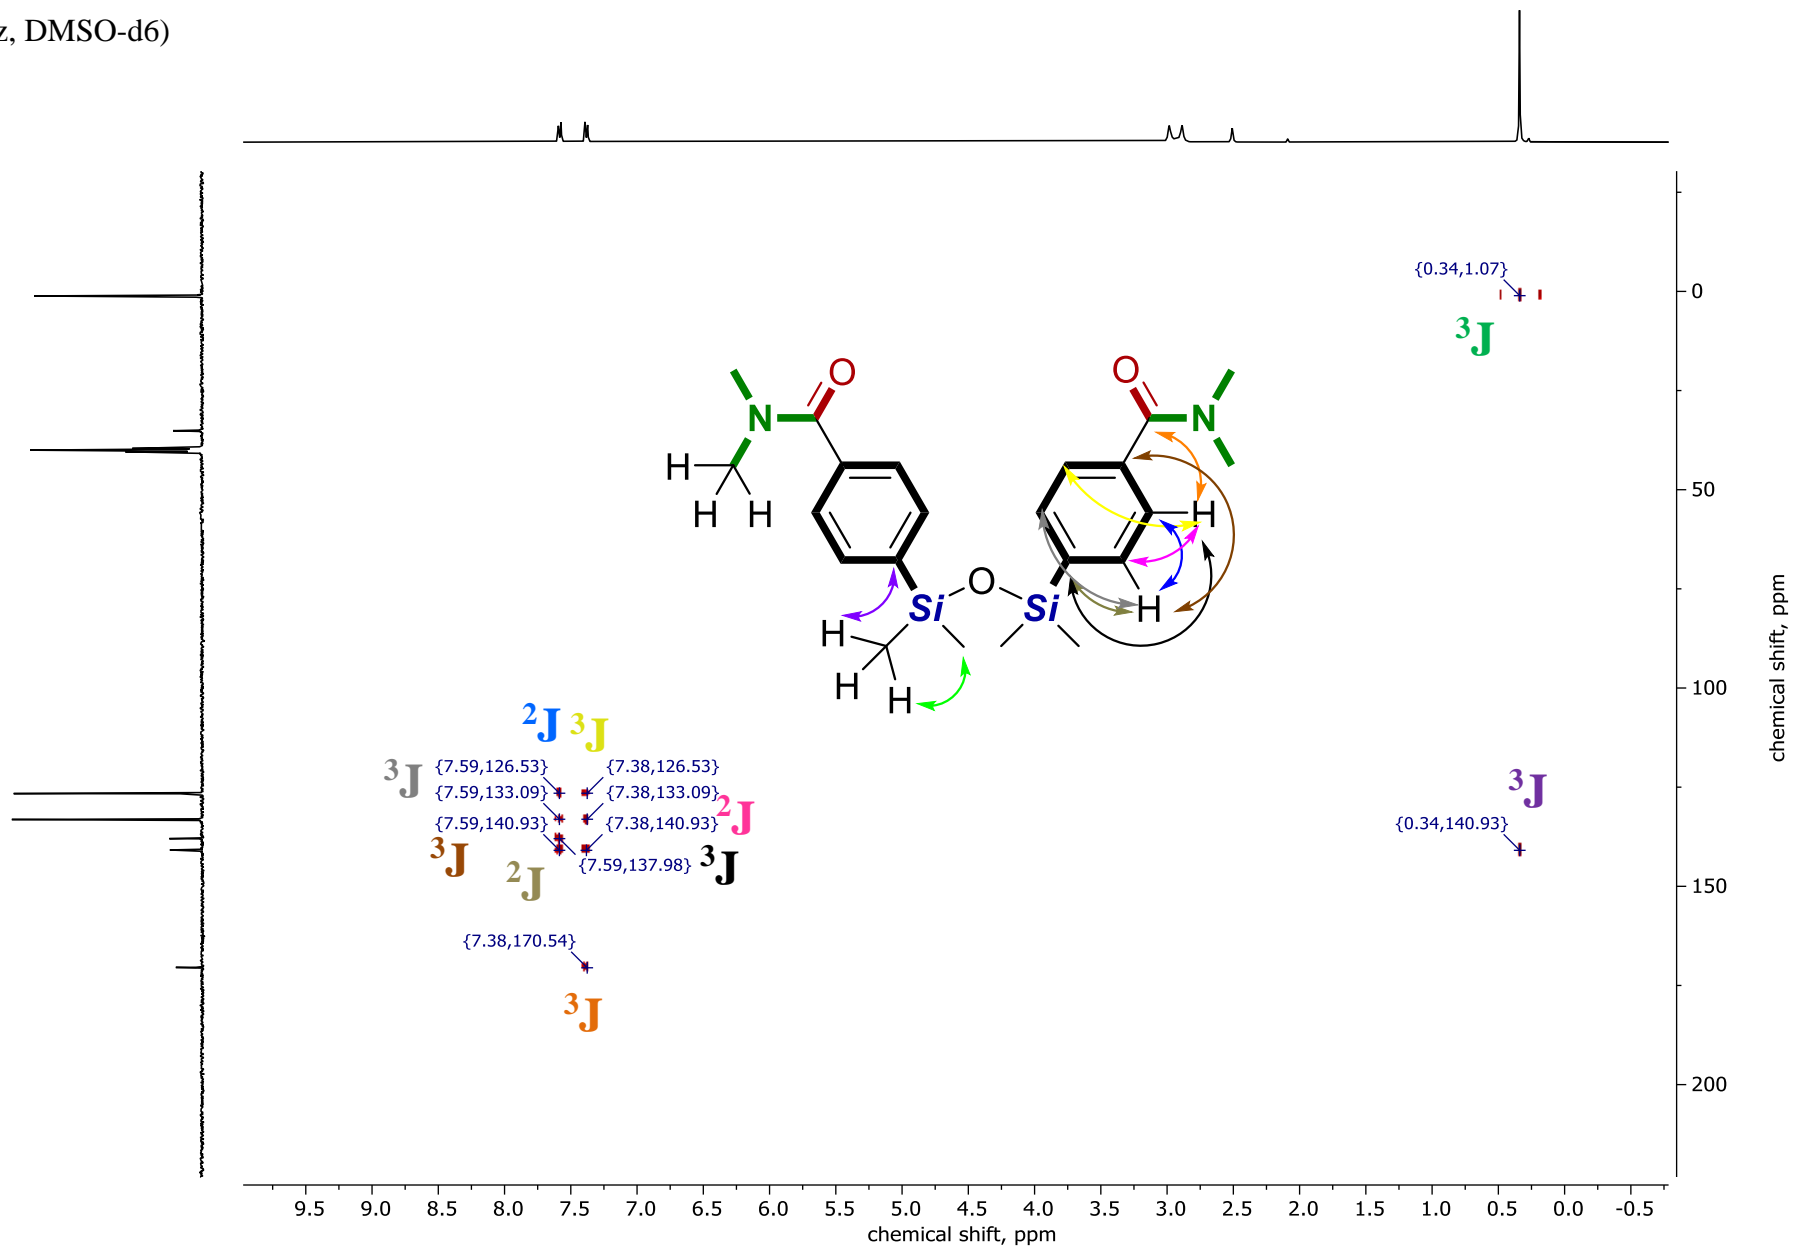

$^1\text{H} - ^{29}\text{Si}$  HMBC  
(400 MHz, DMSO-d<sub>6</sub>)

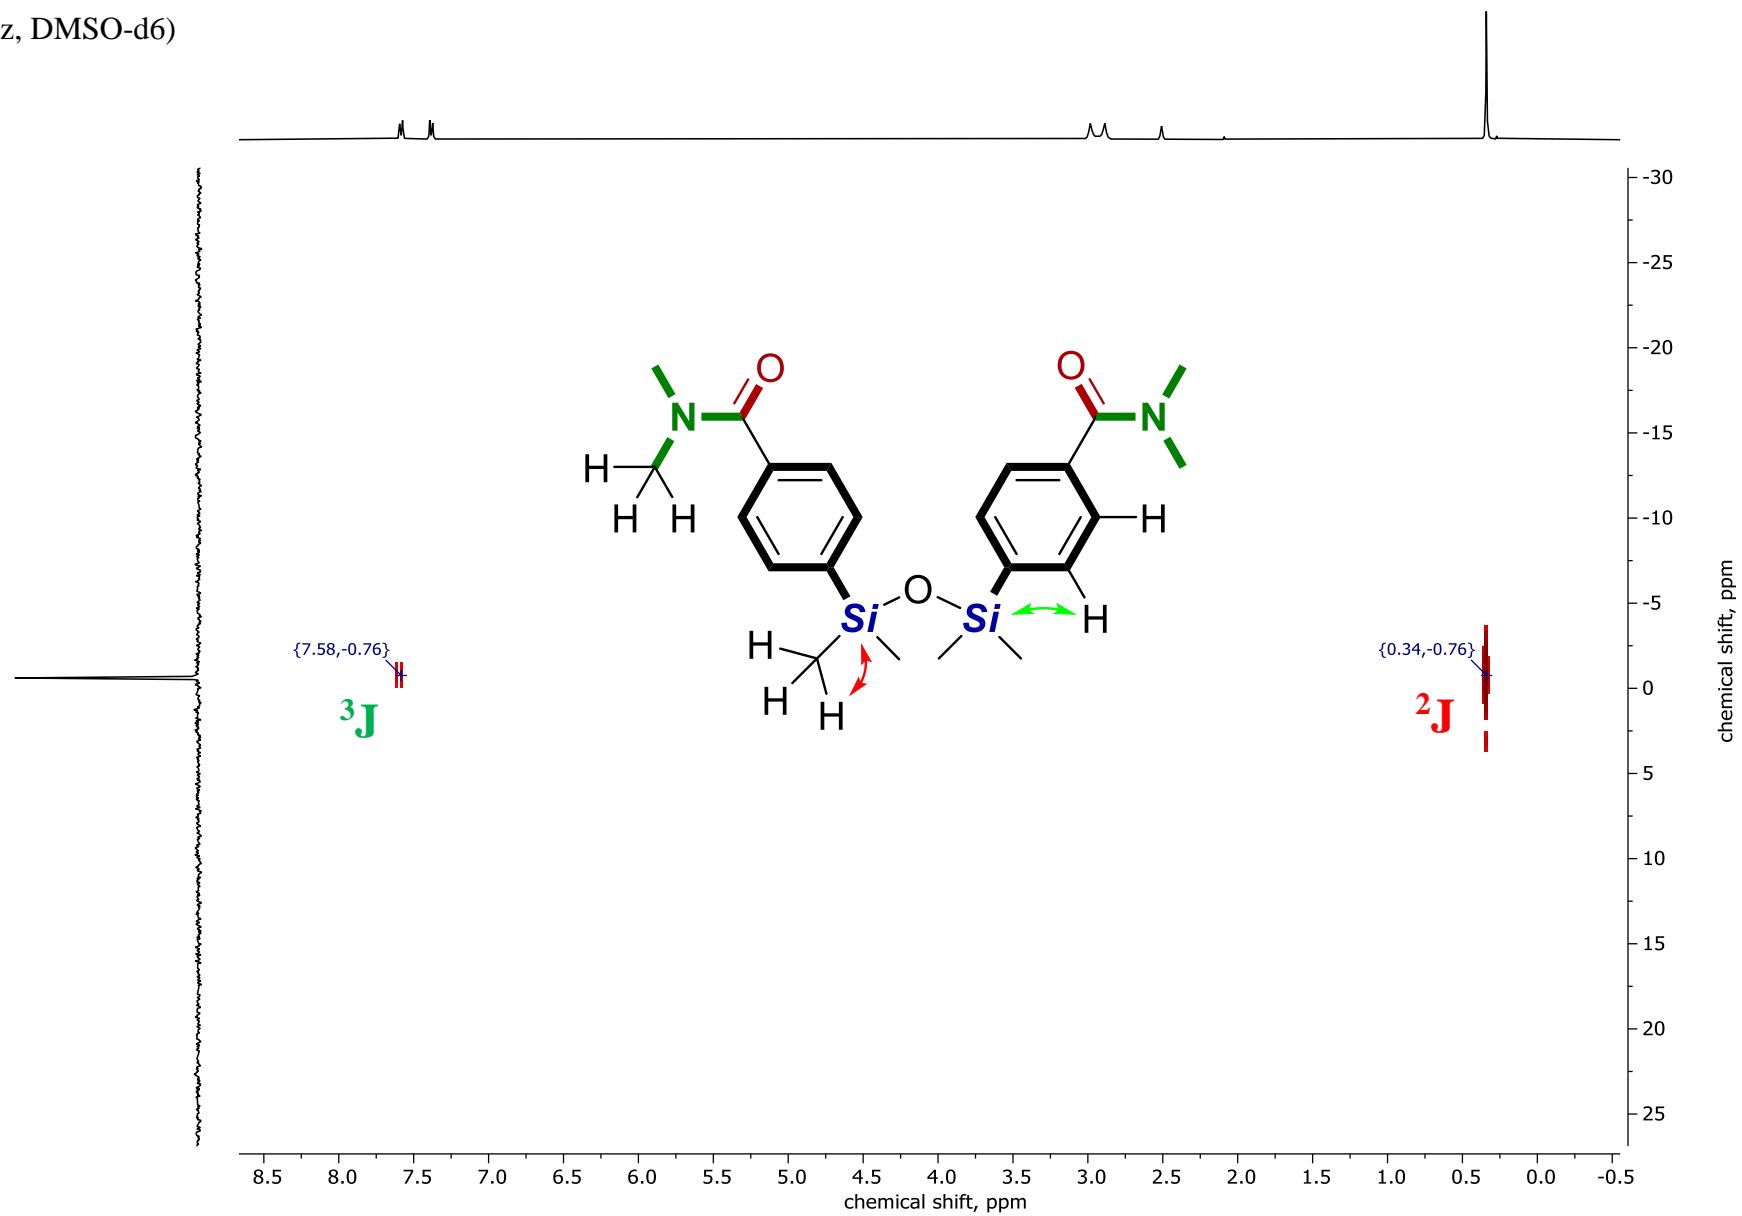

S59

IR-spectrum

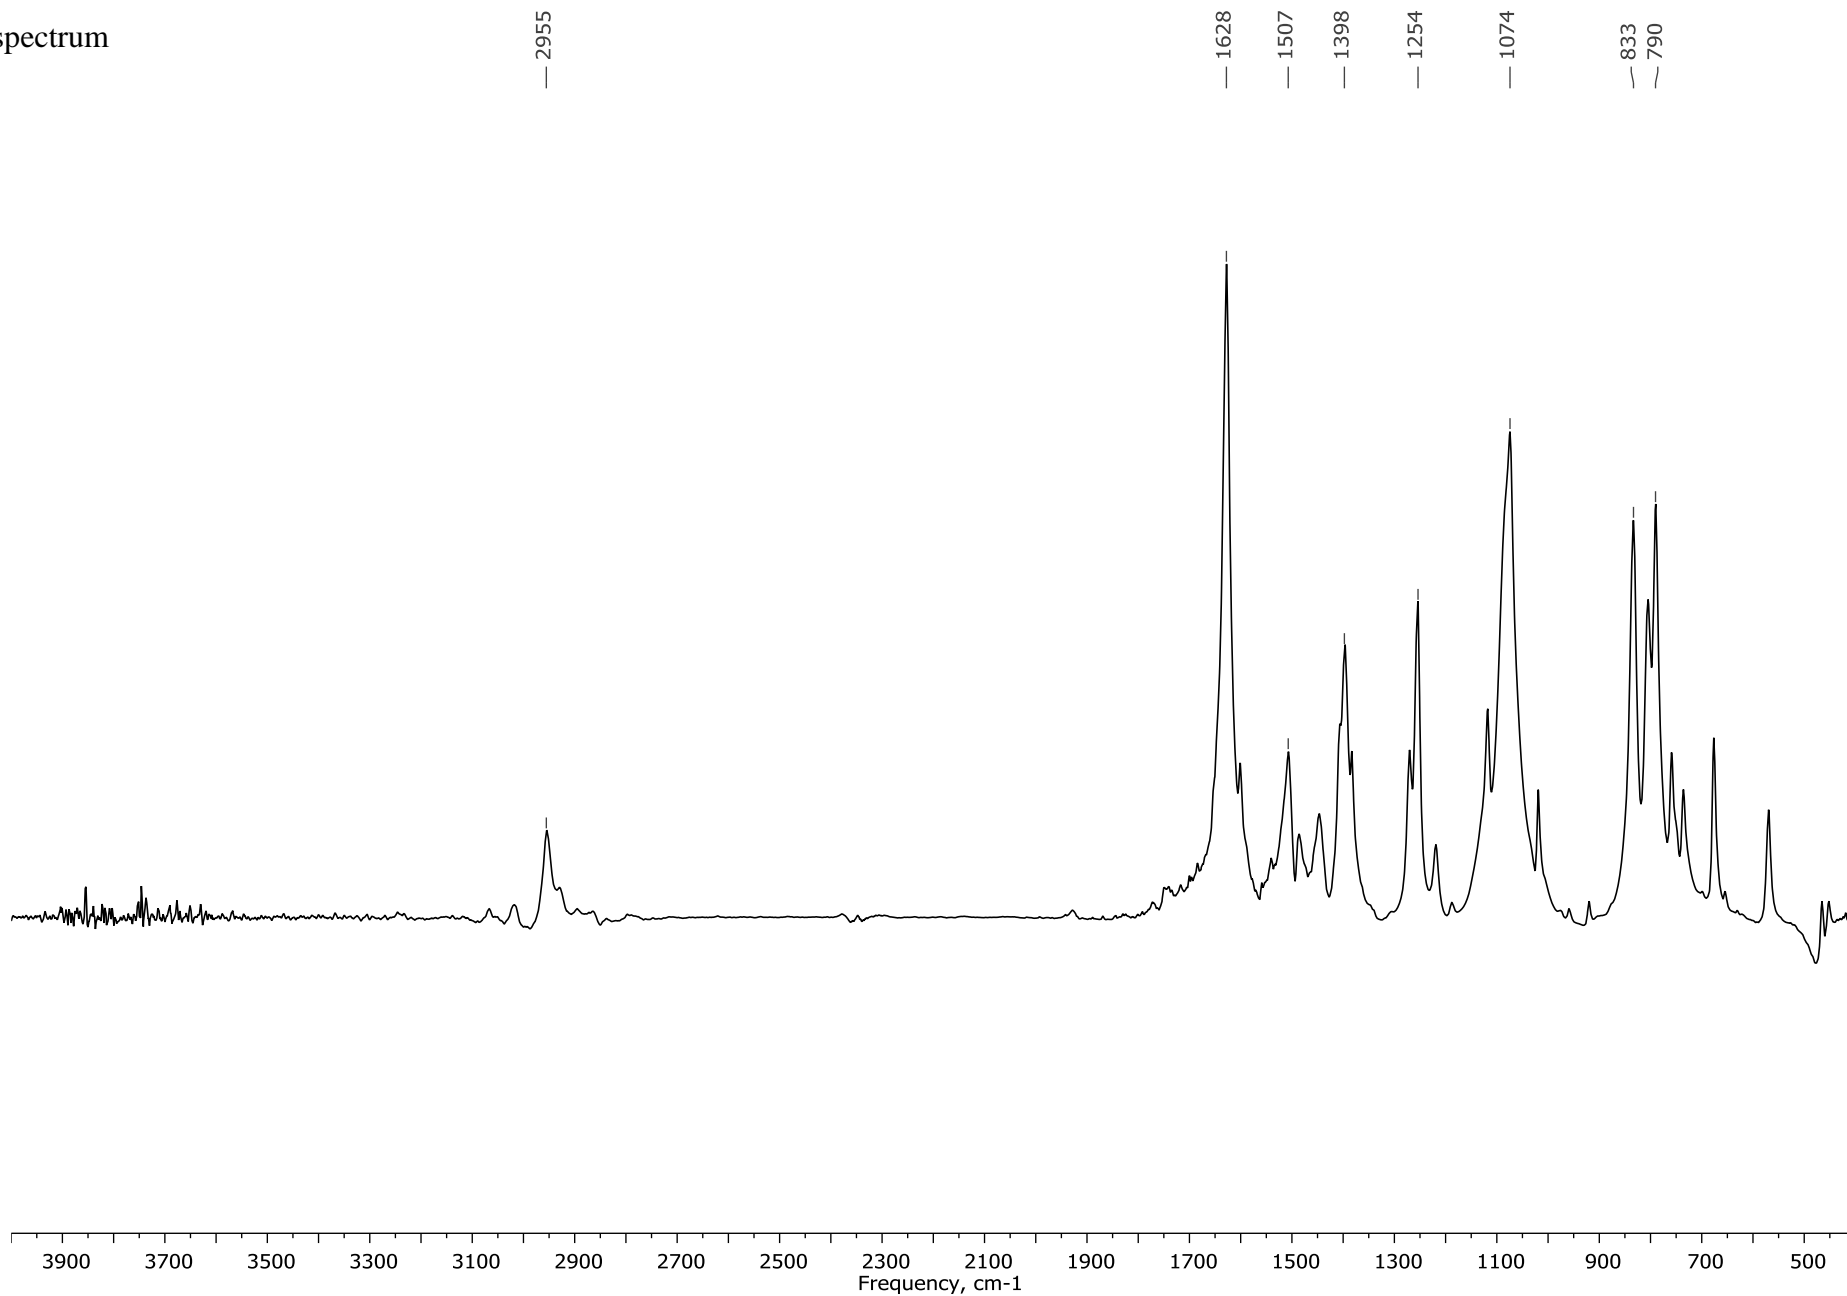

HRMS (ESI)

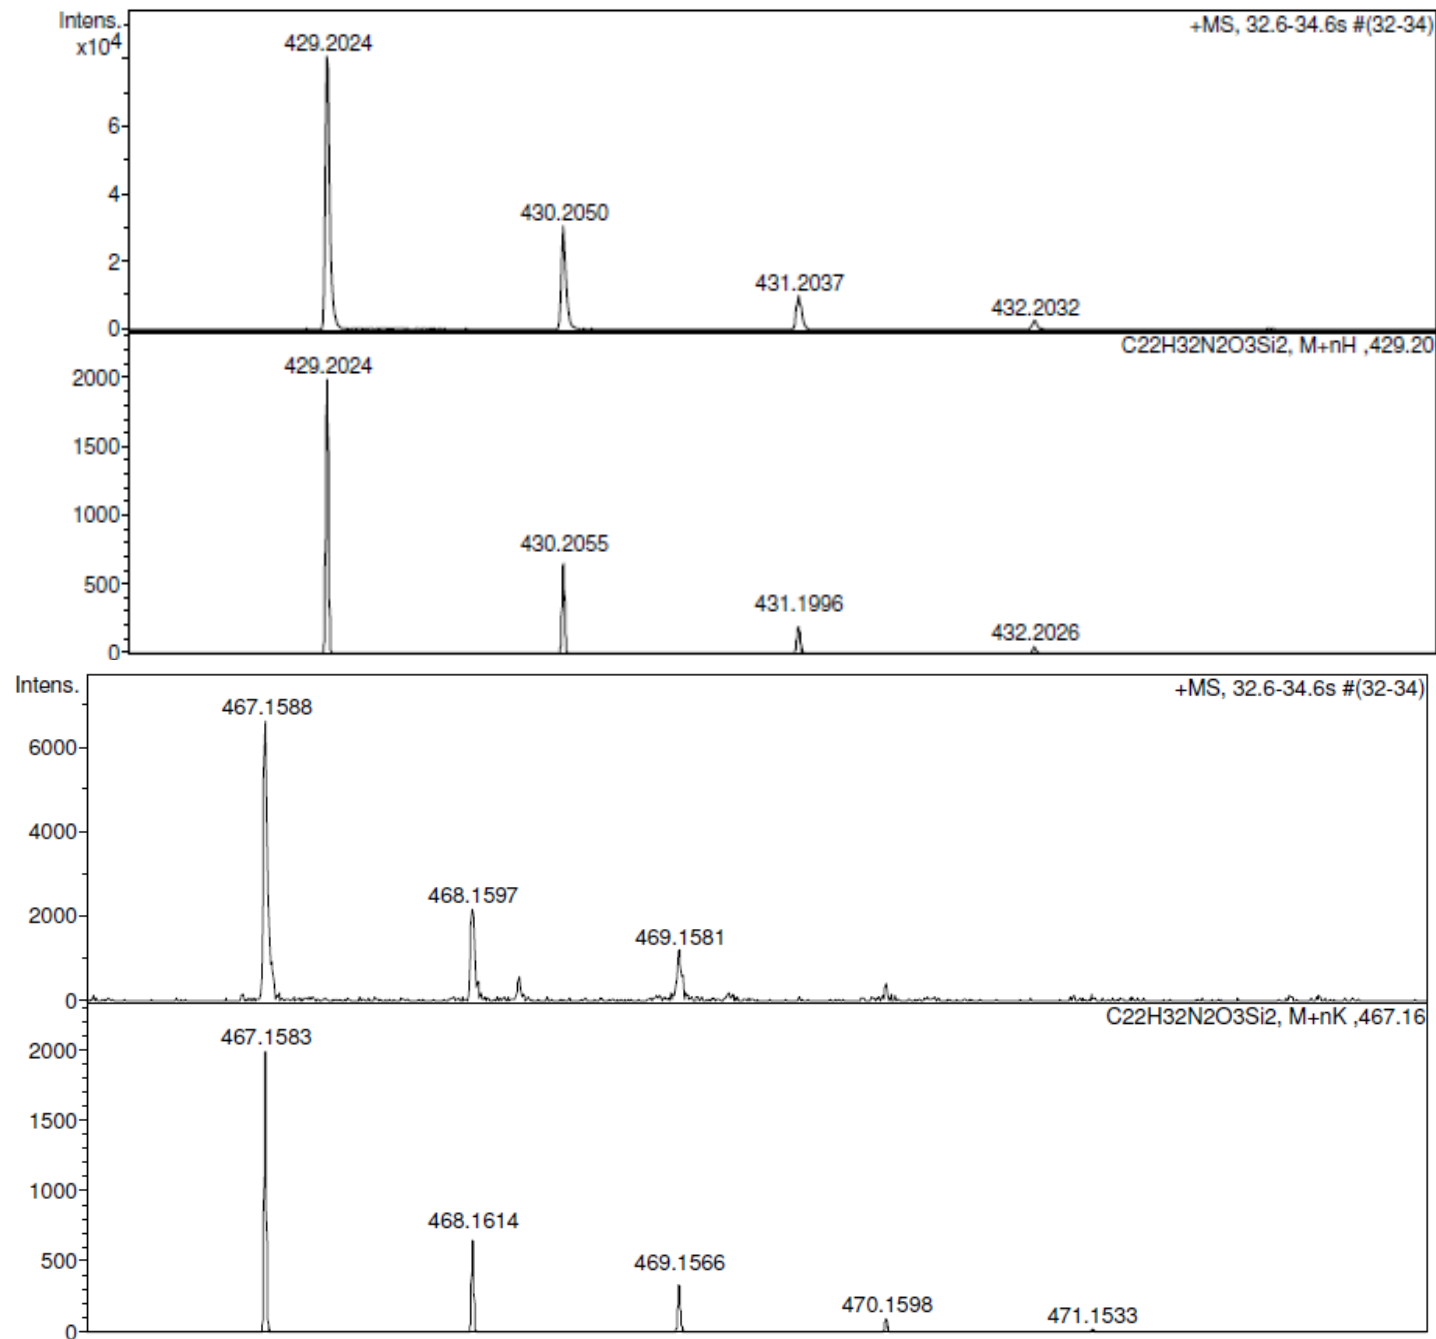

S61

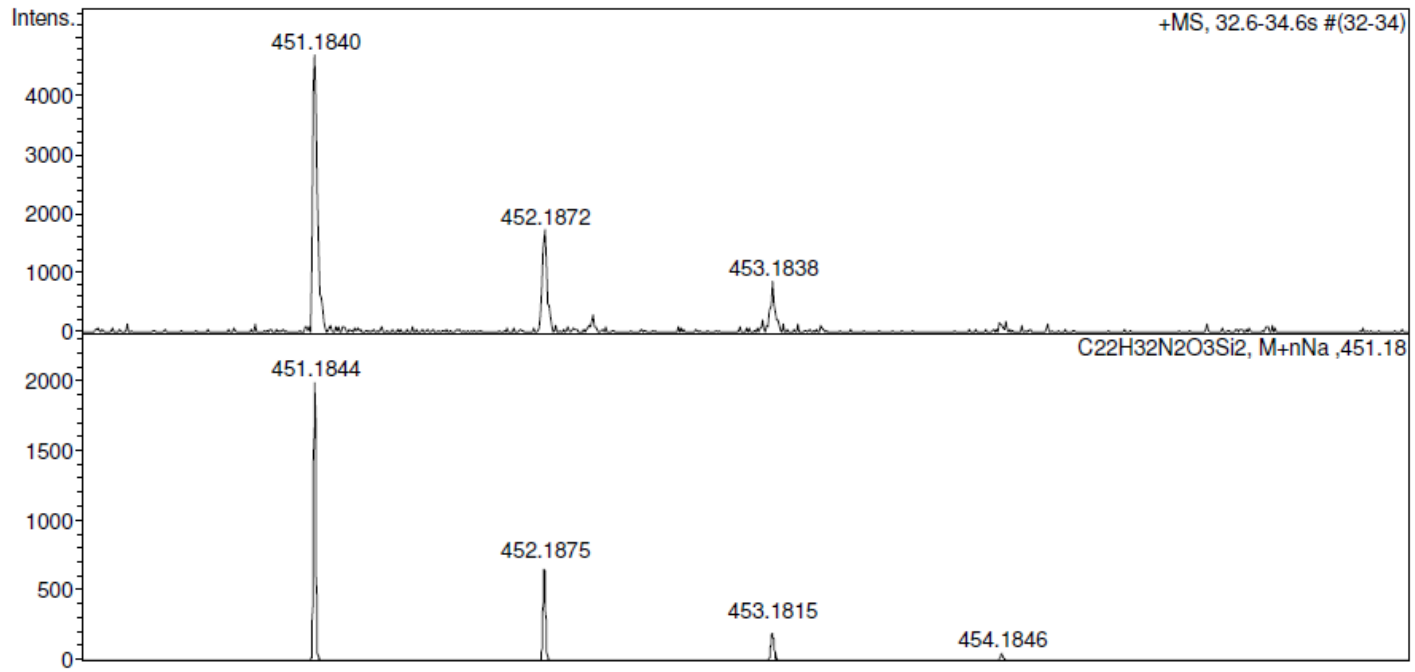

S62

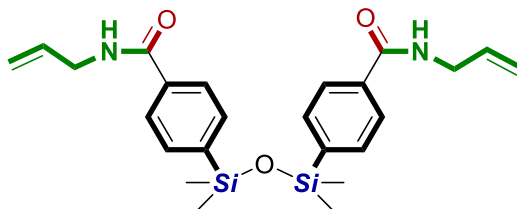

**Characterisation data for 4,4'-(1,1,3,3-tetramethyldisiloxane-1,3-diyl)bis(N-allylbenzamide):**

$^1\text{H}$  NMR (400 MHz, DMSO- $d_6$ ):  $\delta$  = 8.69 (t,  $^3J=8$  Hz, 2H),  $\delta$  = 7.87 (d,  $^3J=11$  Hz, 4H),  $\delta$  = 7.62 (d,  $^3J=11$  Hz, 4H),  $\delta$  = 5.96-5.84 (m, 2H),  $\delta$  = 5.20-5.06 (m, 4H),  $\delta$  = 3.92 (t,  $^3J=7$  Hz, 4H),  $\delta$  = 0.33 (s, 12H).  $^{13}\text{C}$  NMR (100 MHz, DMSO- $d_6$ ):  $\delta$  = 173.62, 166.52, 143.00, 135.88, 133.18, 126.92, 115.54, 41.99, 1.13.  $^{29}\text{Si}$  NMR (80 MHz, DMSO- $d_6$ ):  $\delta$  = -0.56.  $^{15}\text{N}$  NMR (40 MHz, DMSO- $d_6$ ):  $\delta$  = 109.80. HRMS (ESI)  $m/z$   $[\text{M} + \text{H}]^+$  : calcd for  $[\text{C}_{24}\text{H}_{32}\text{N}_2\text{O}_3\text{Si}_2 + \text{H}]^+$ , 453.2024; found, 453.2026. IR ( $\text{cm}^{-1}$ ): 3279, 2953, 1636, 1539, 1305, 1254, 1107, 1070, 838-668.

<sup>1</sup>H NMR

(400 MHz, DMSO-d6)

S63

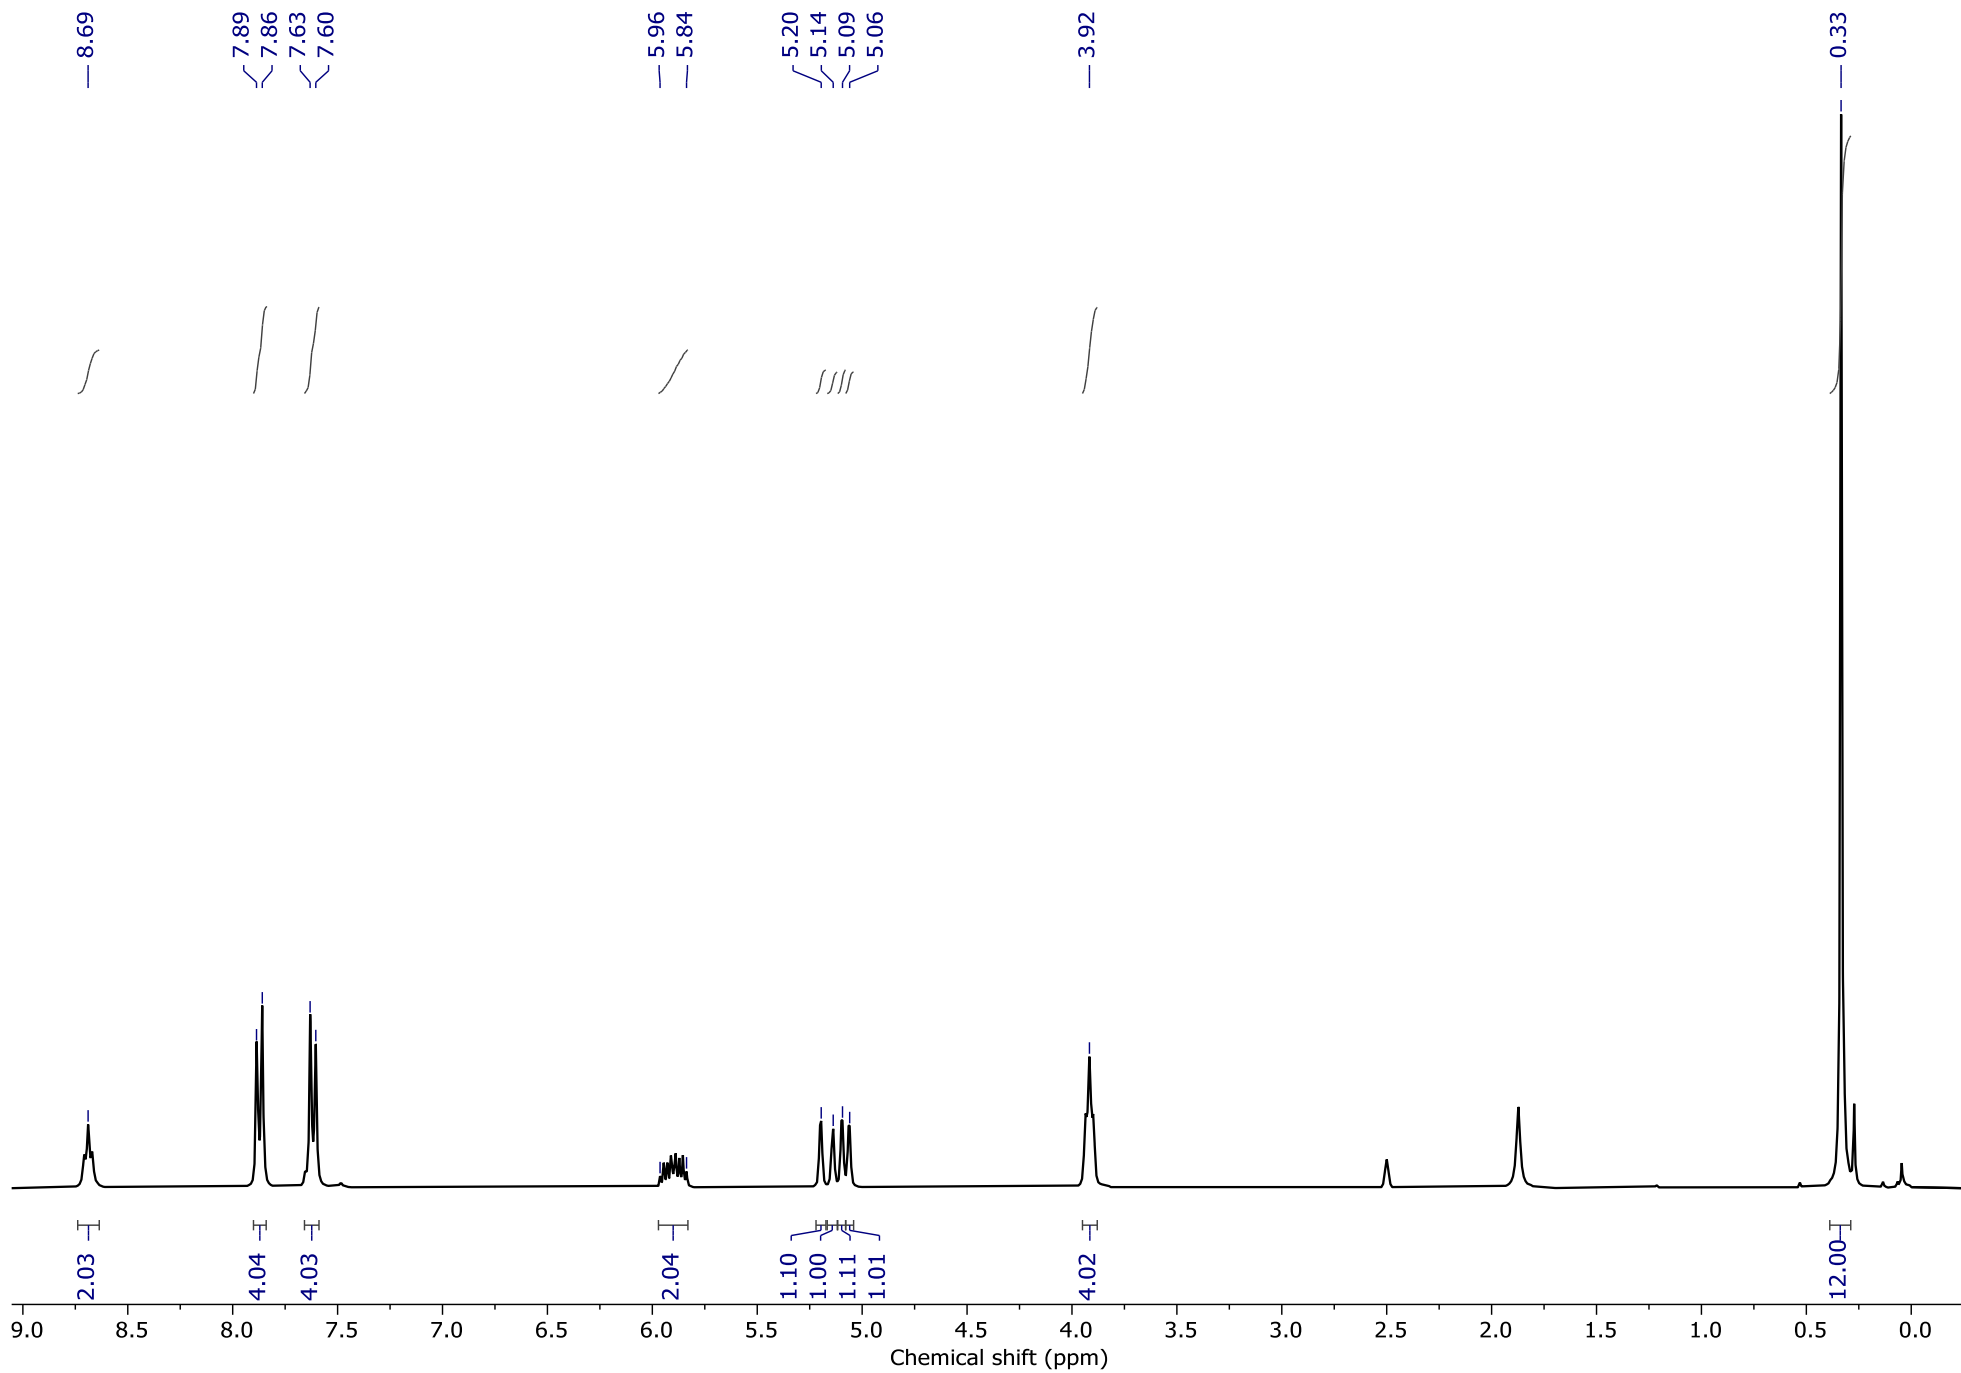

<sup>13</sup>C NMR

(100 MHz, DMSO-d6)

S64

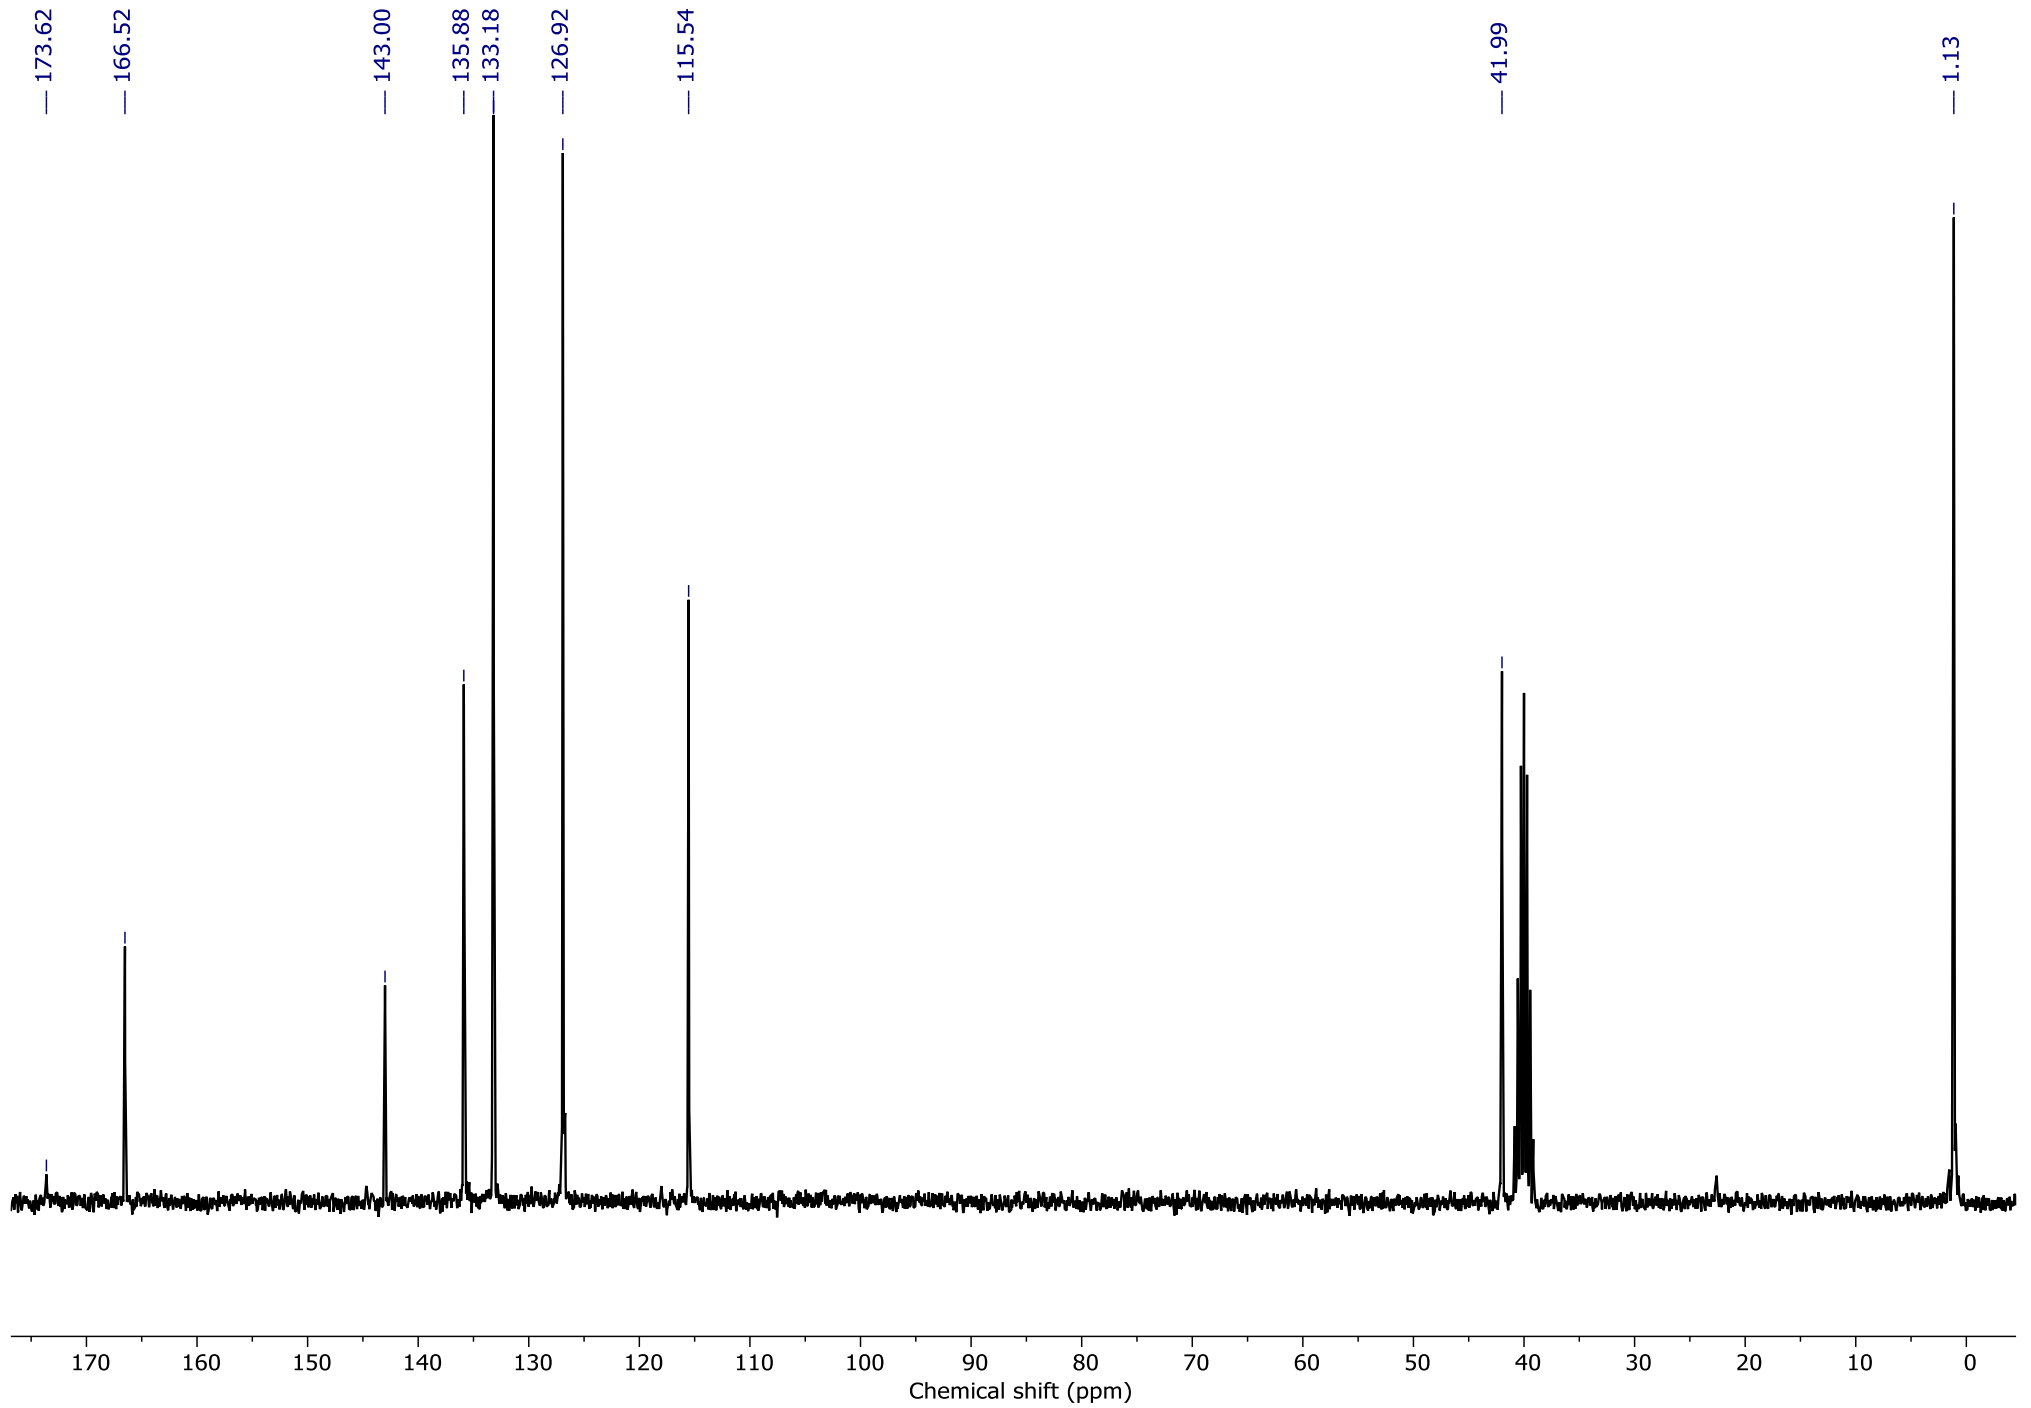



$^{29}\text{Si}$  NMR  
(80 MHz, DMSO-d<sub>6</sub>)

S65

-0.56

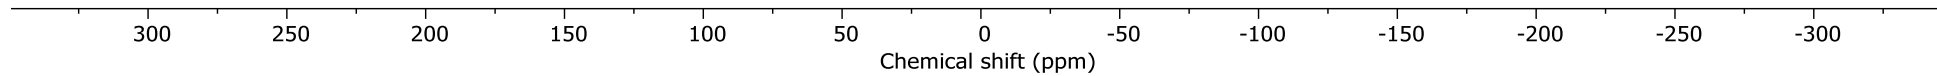

$^{15}\text{N}$  NMR  
(reconstructed, 40 MHz,  
DMSO-d6)

S66

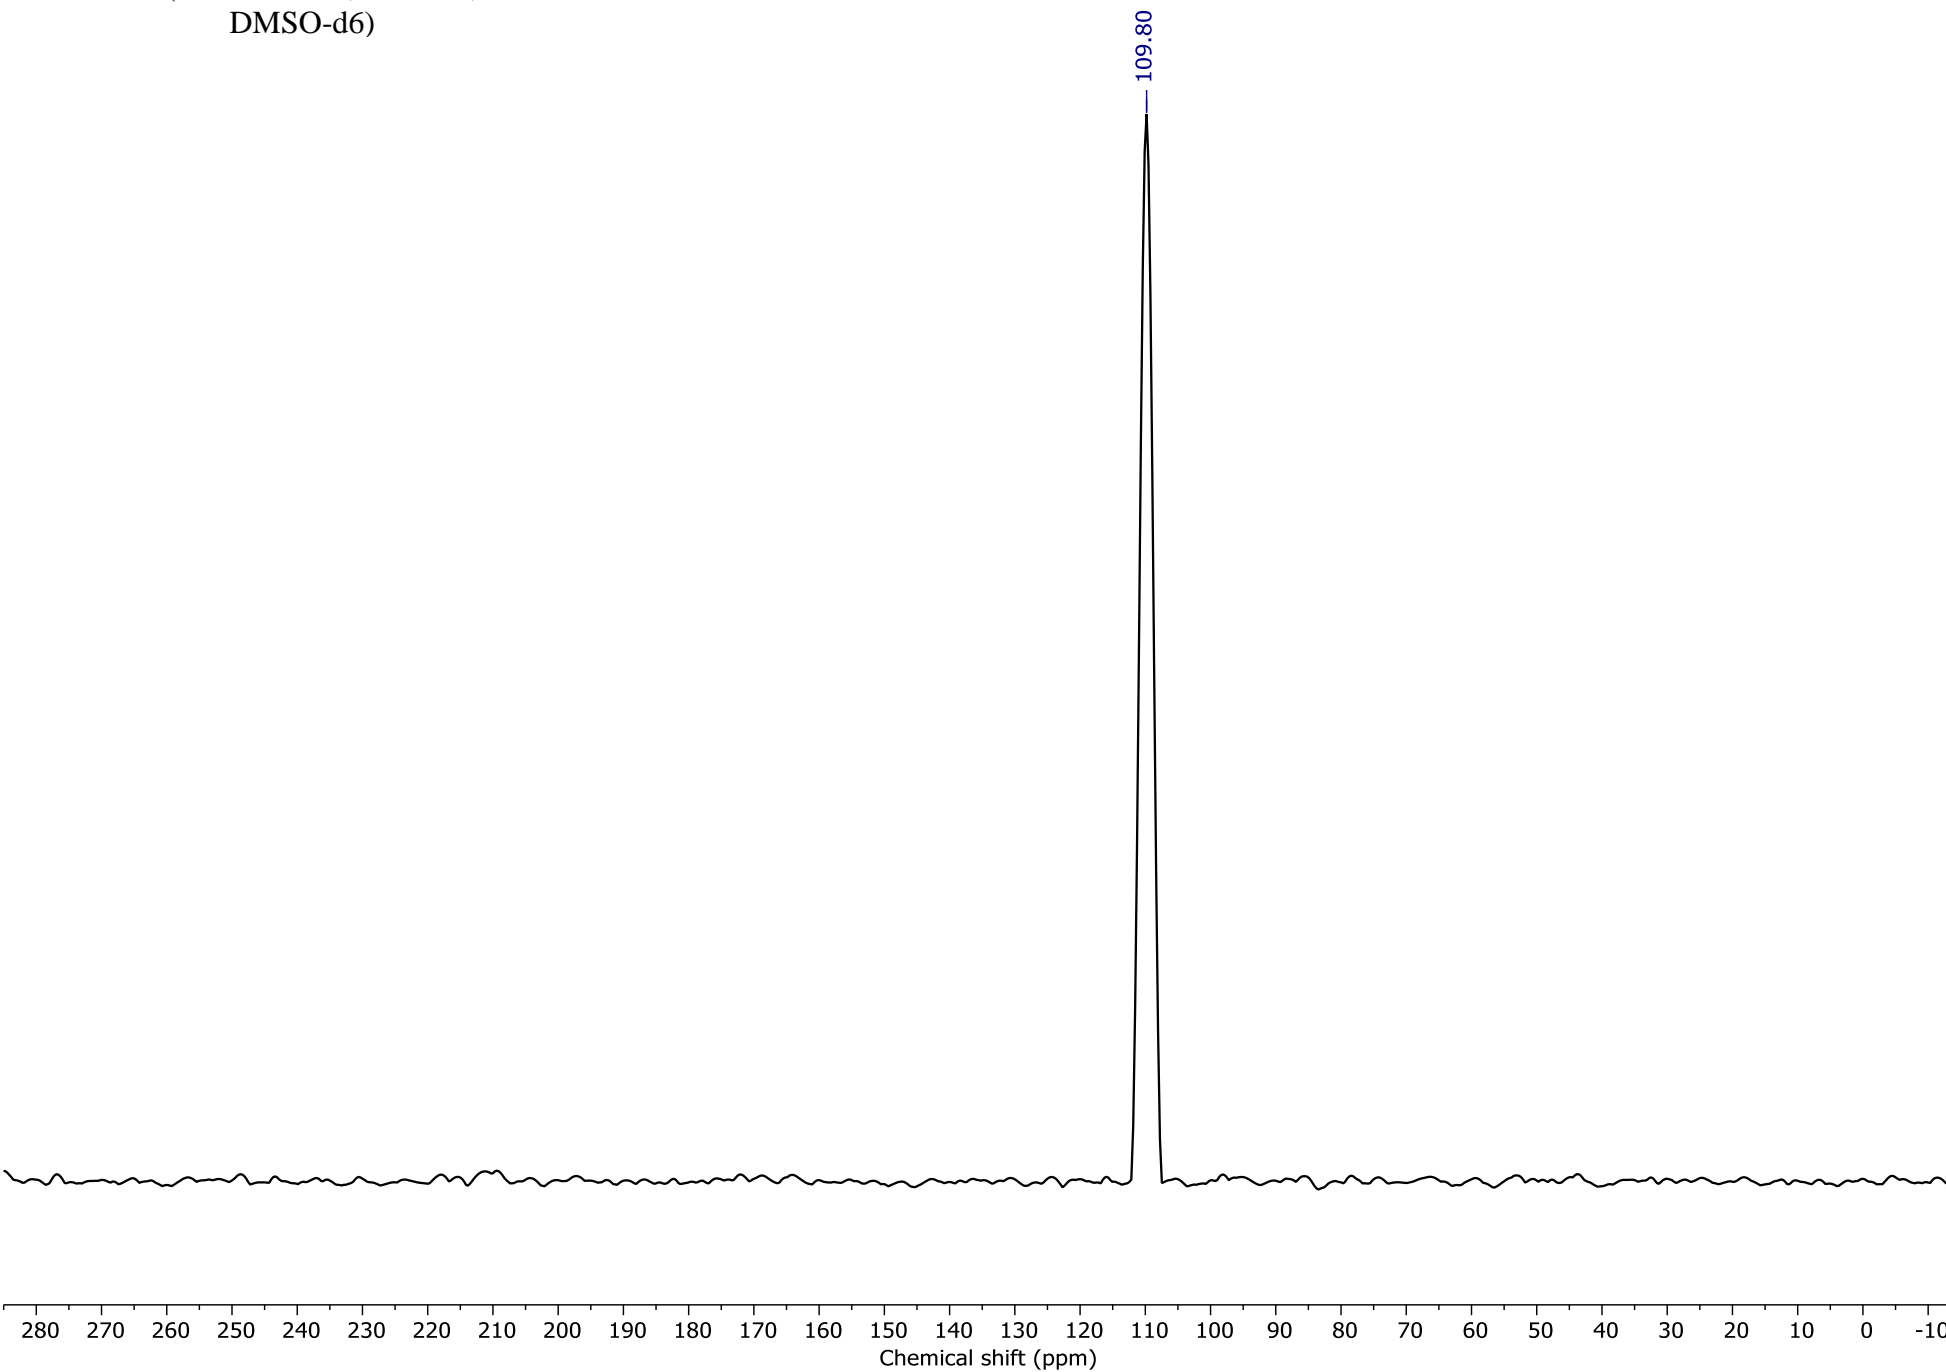

S67

$^1\text{H} - ^{13}\text{C}$  HMBC  
(400 MHz, DMSO-d<sub>6</sub>)

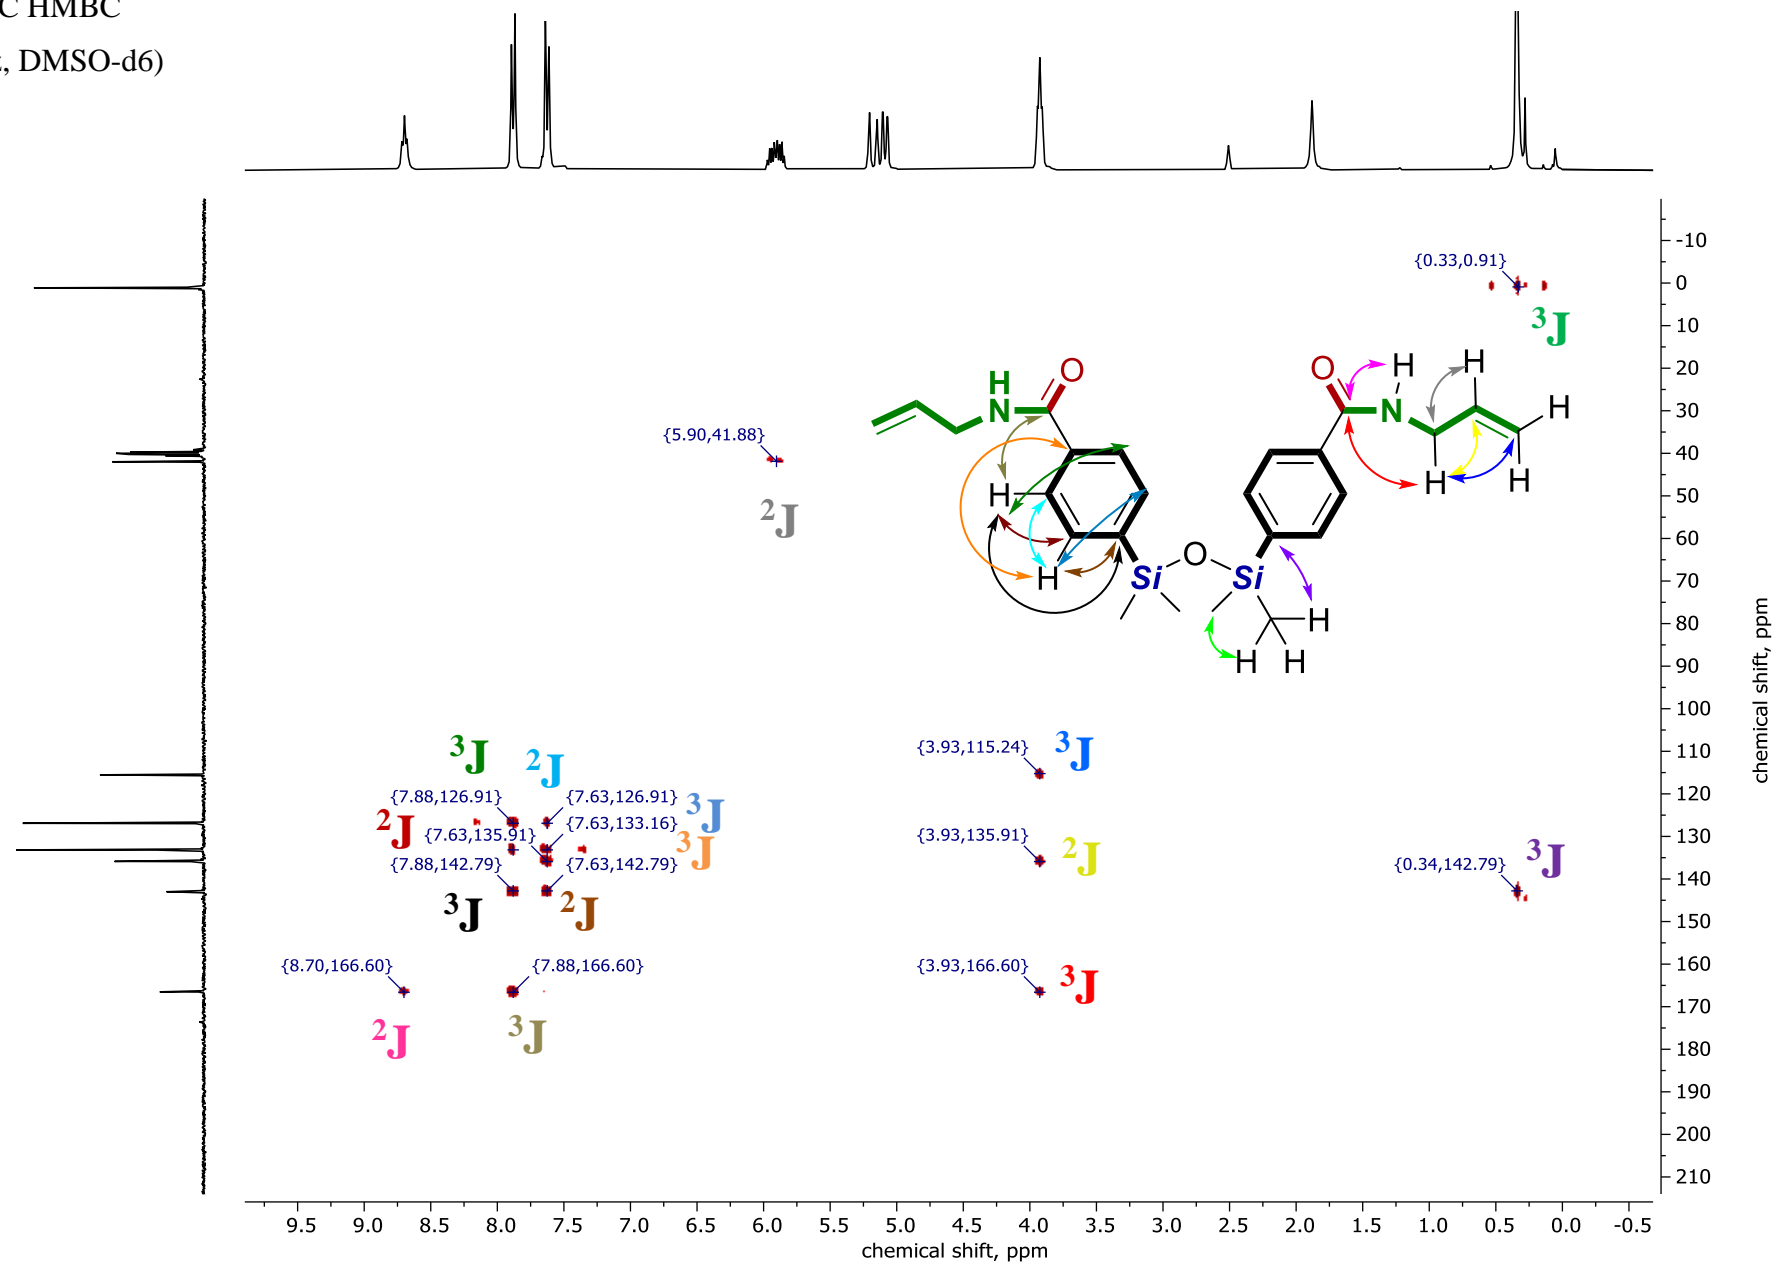

S68

$^1\text{H} - ^{13}\text{C}$  HSQC  
(400 MHz, DMSO-d6)

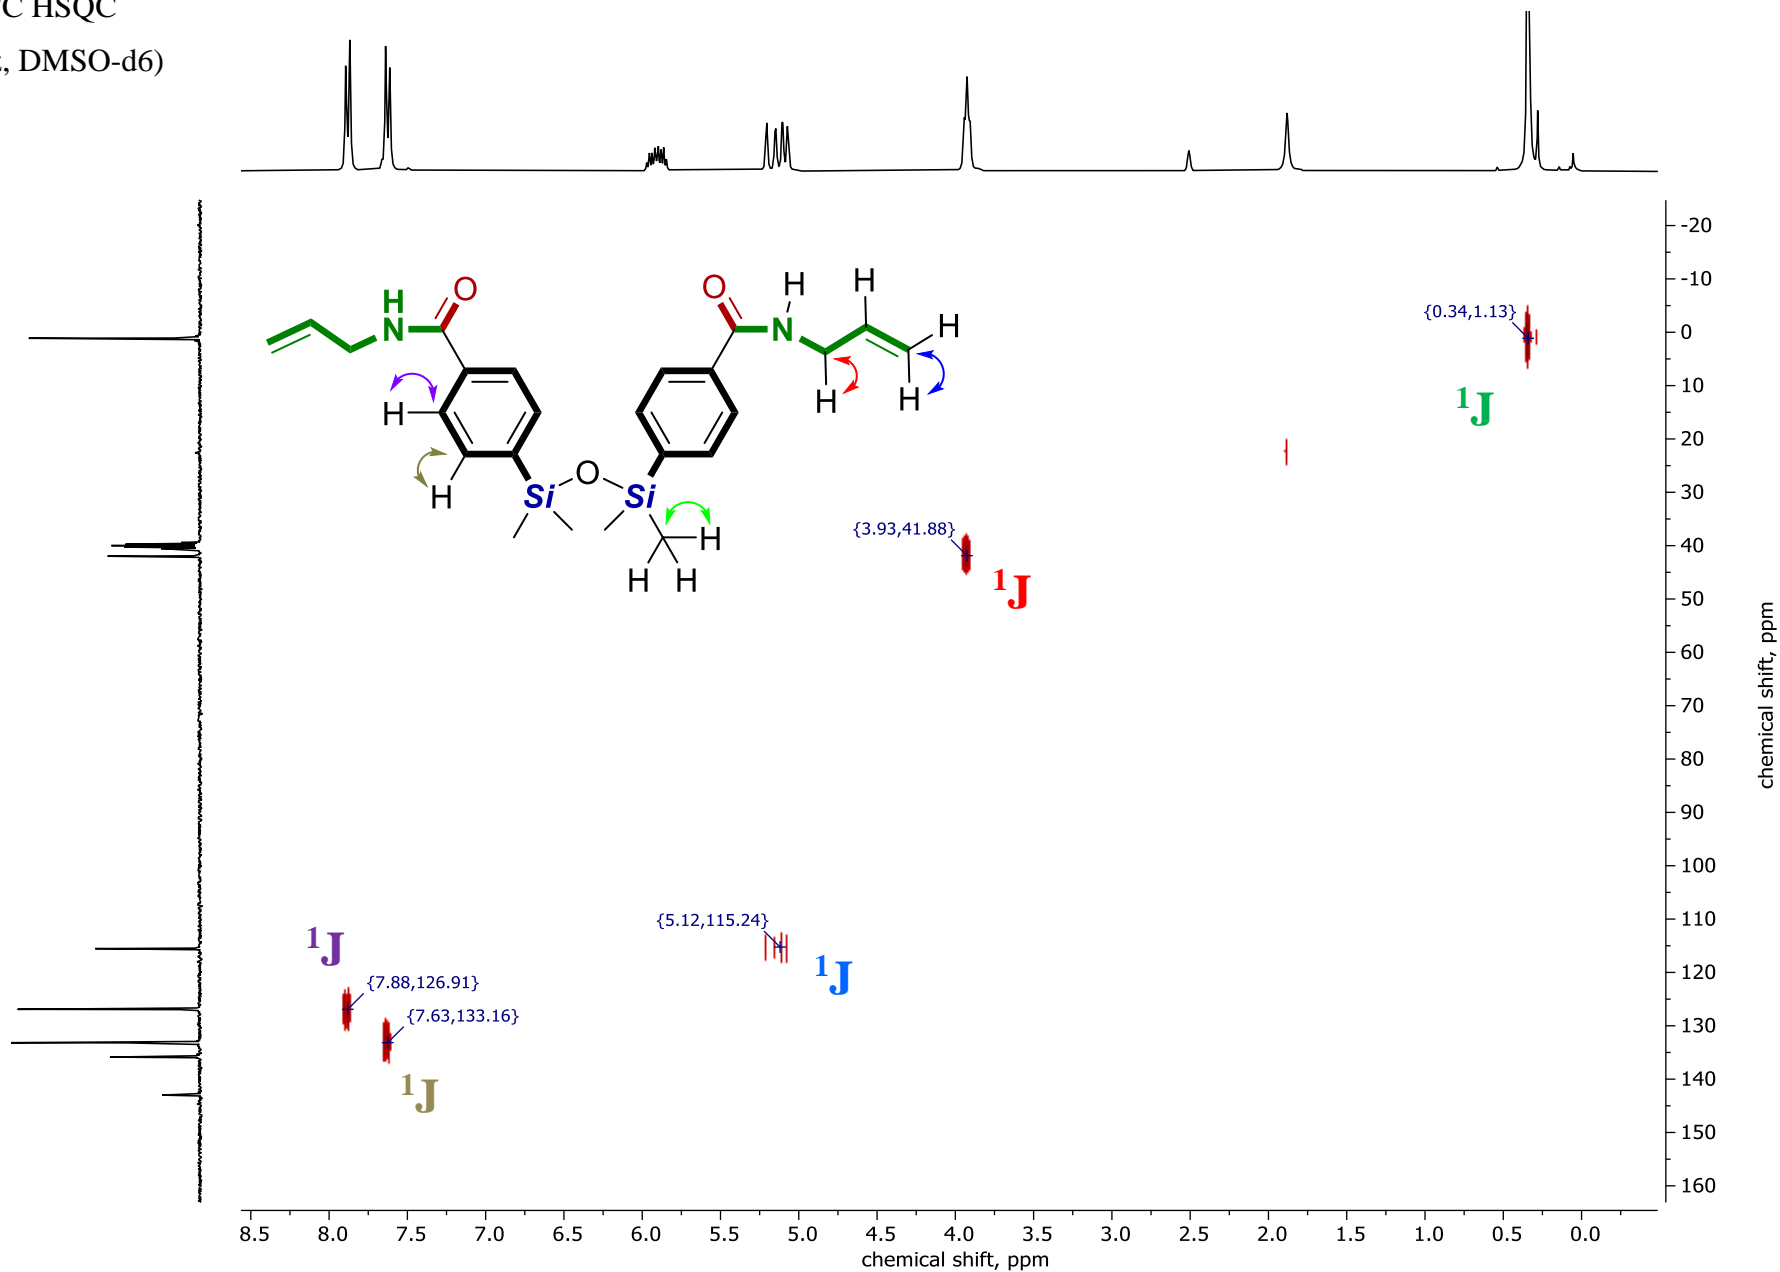

S69

$^1\text{H} - ^{29}\text{Si}$  HMBC  
(400 MHz, DMSO-d6)

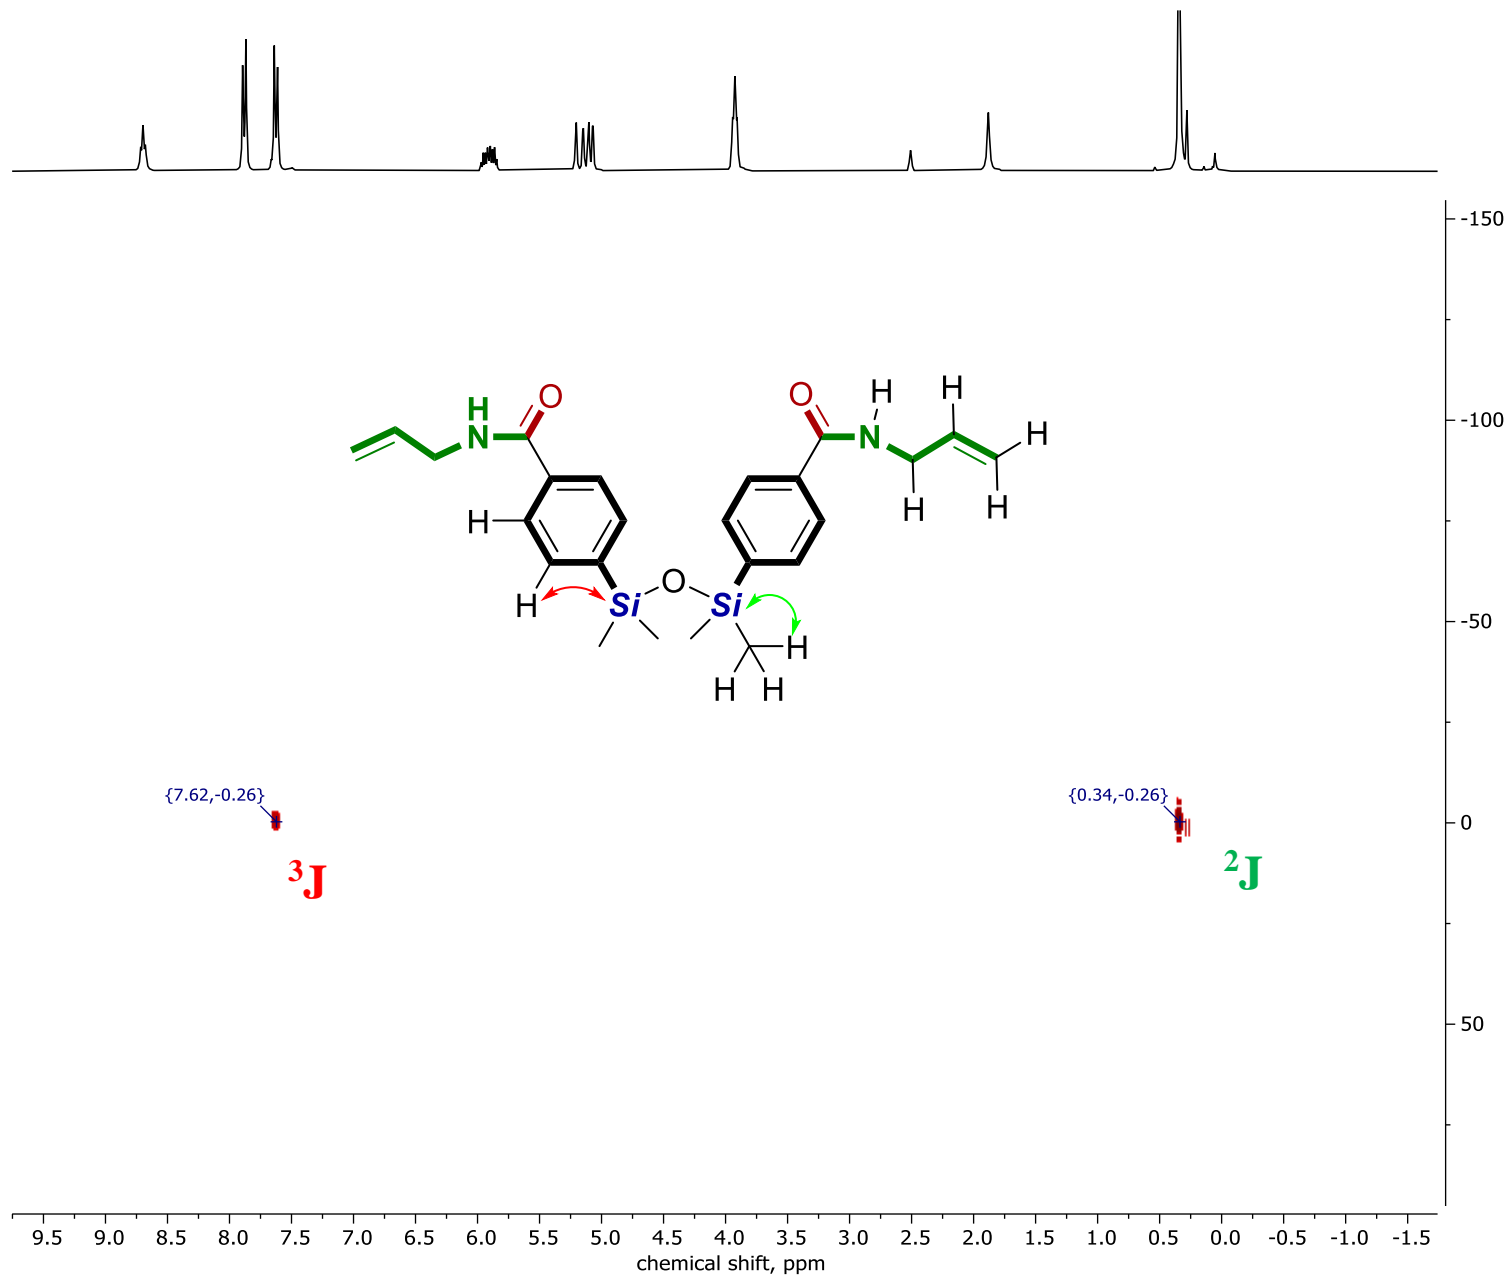

S70

$^1\text{H} - ^{15}\text{N}$  HMBC  
(400 MHz, DMSO-d6)

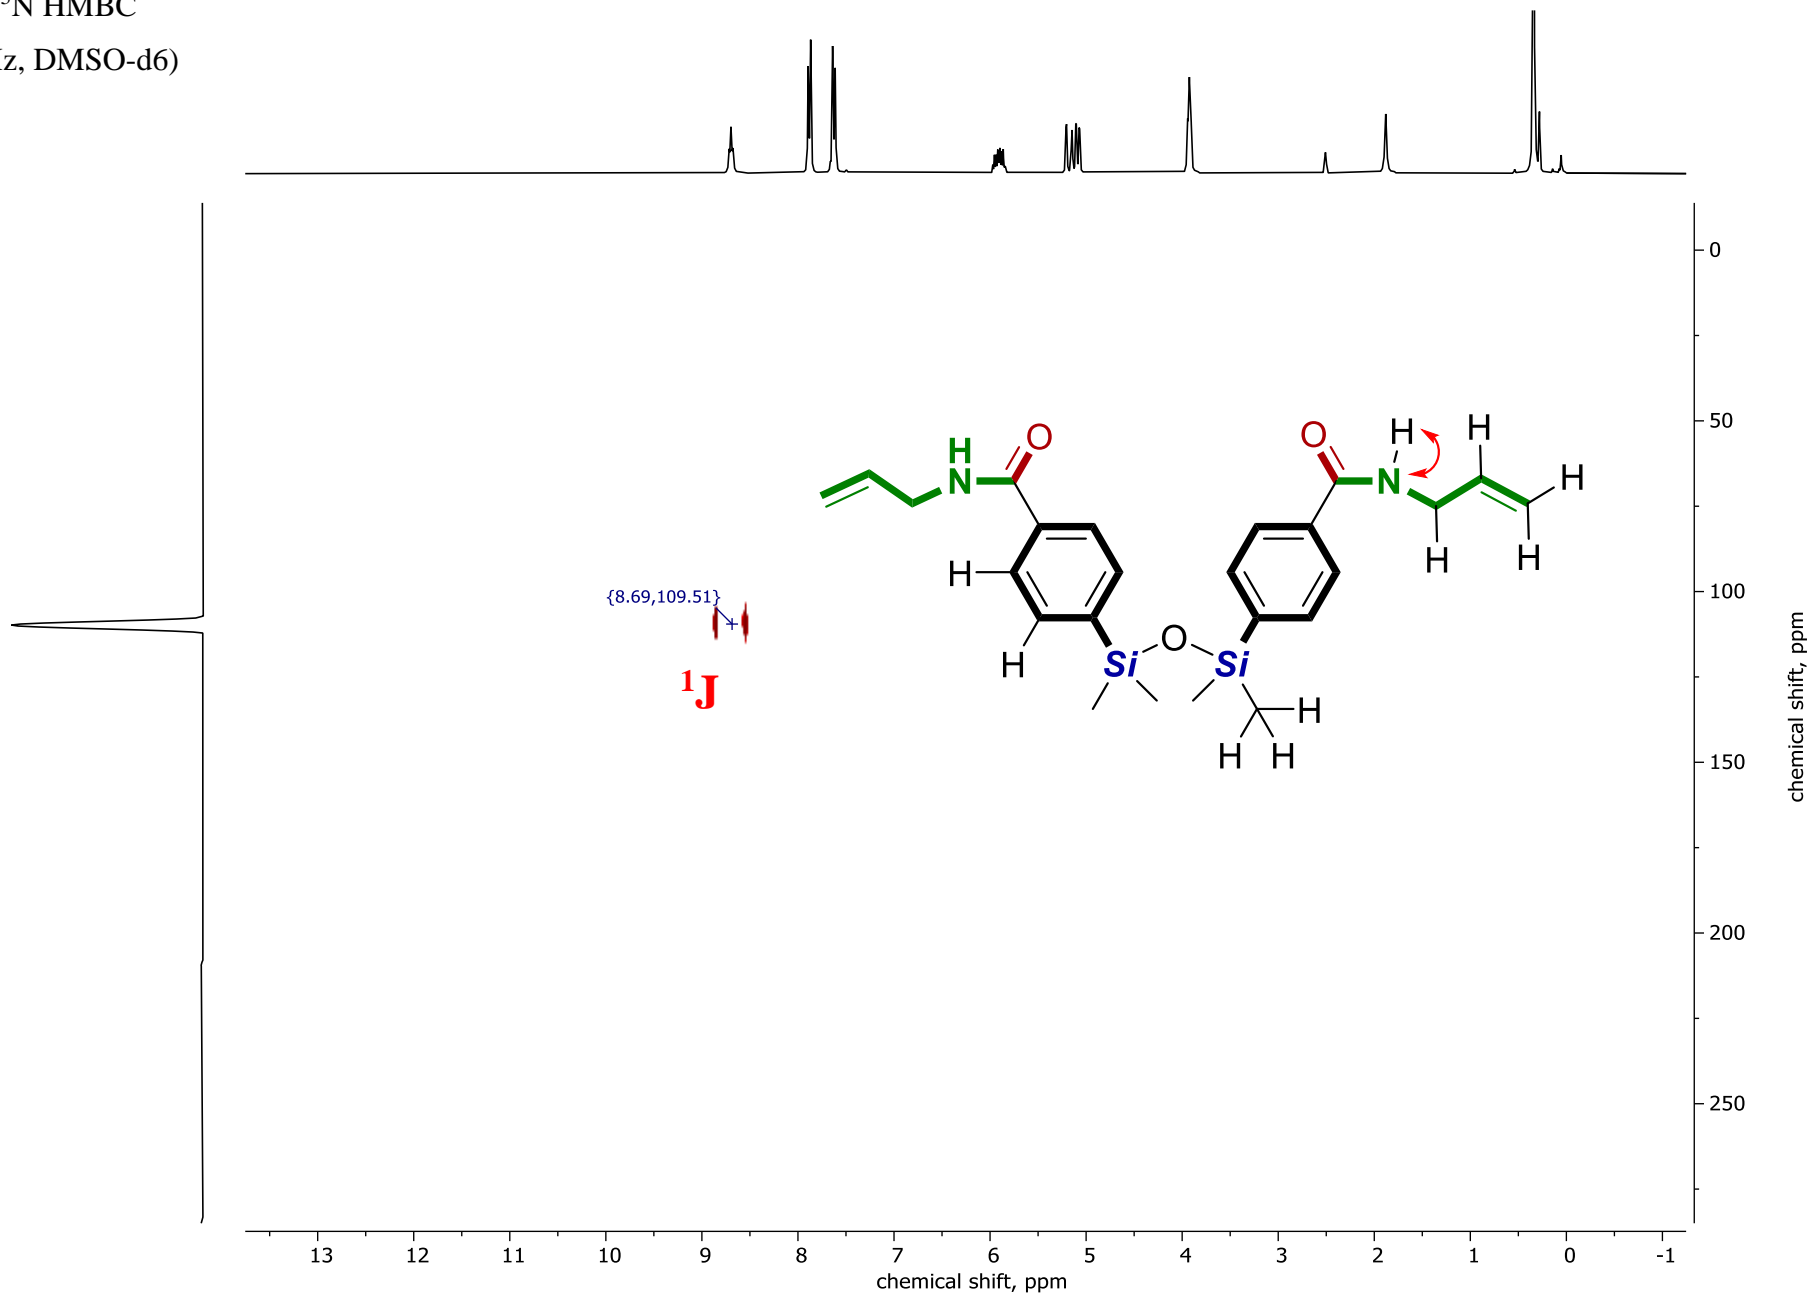

S71

$^1\text{H} - ^{15}\text{N}$  HSQC  
(400 MHz, DMSO-d6)

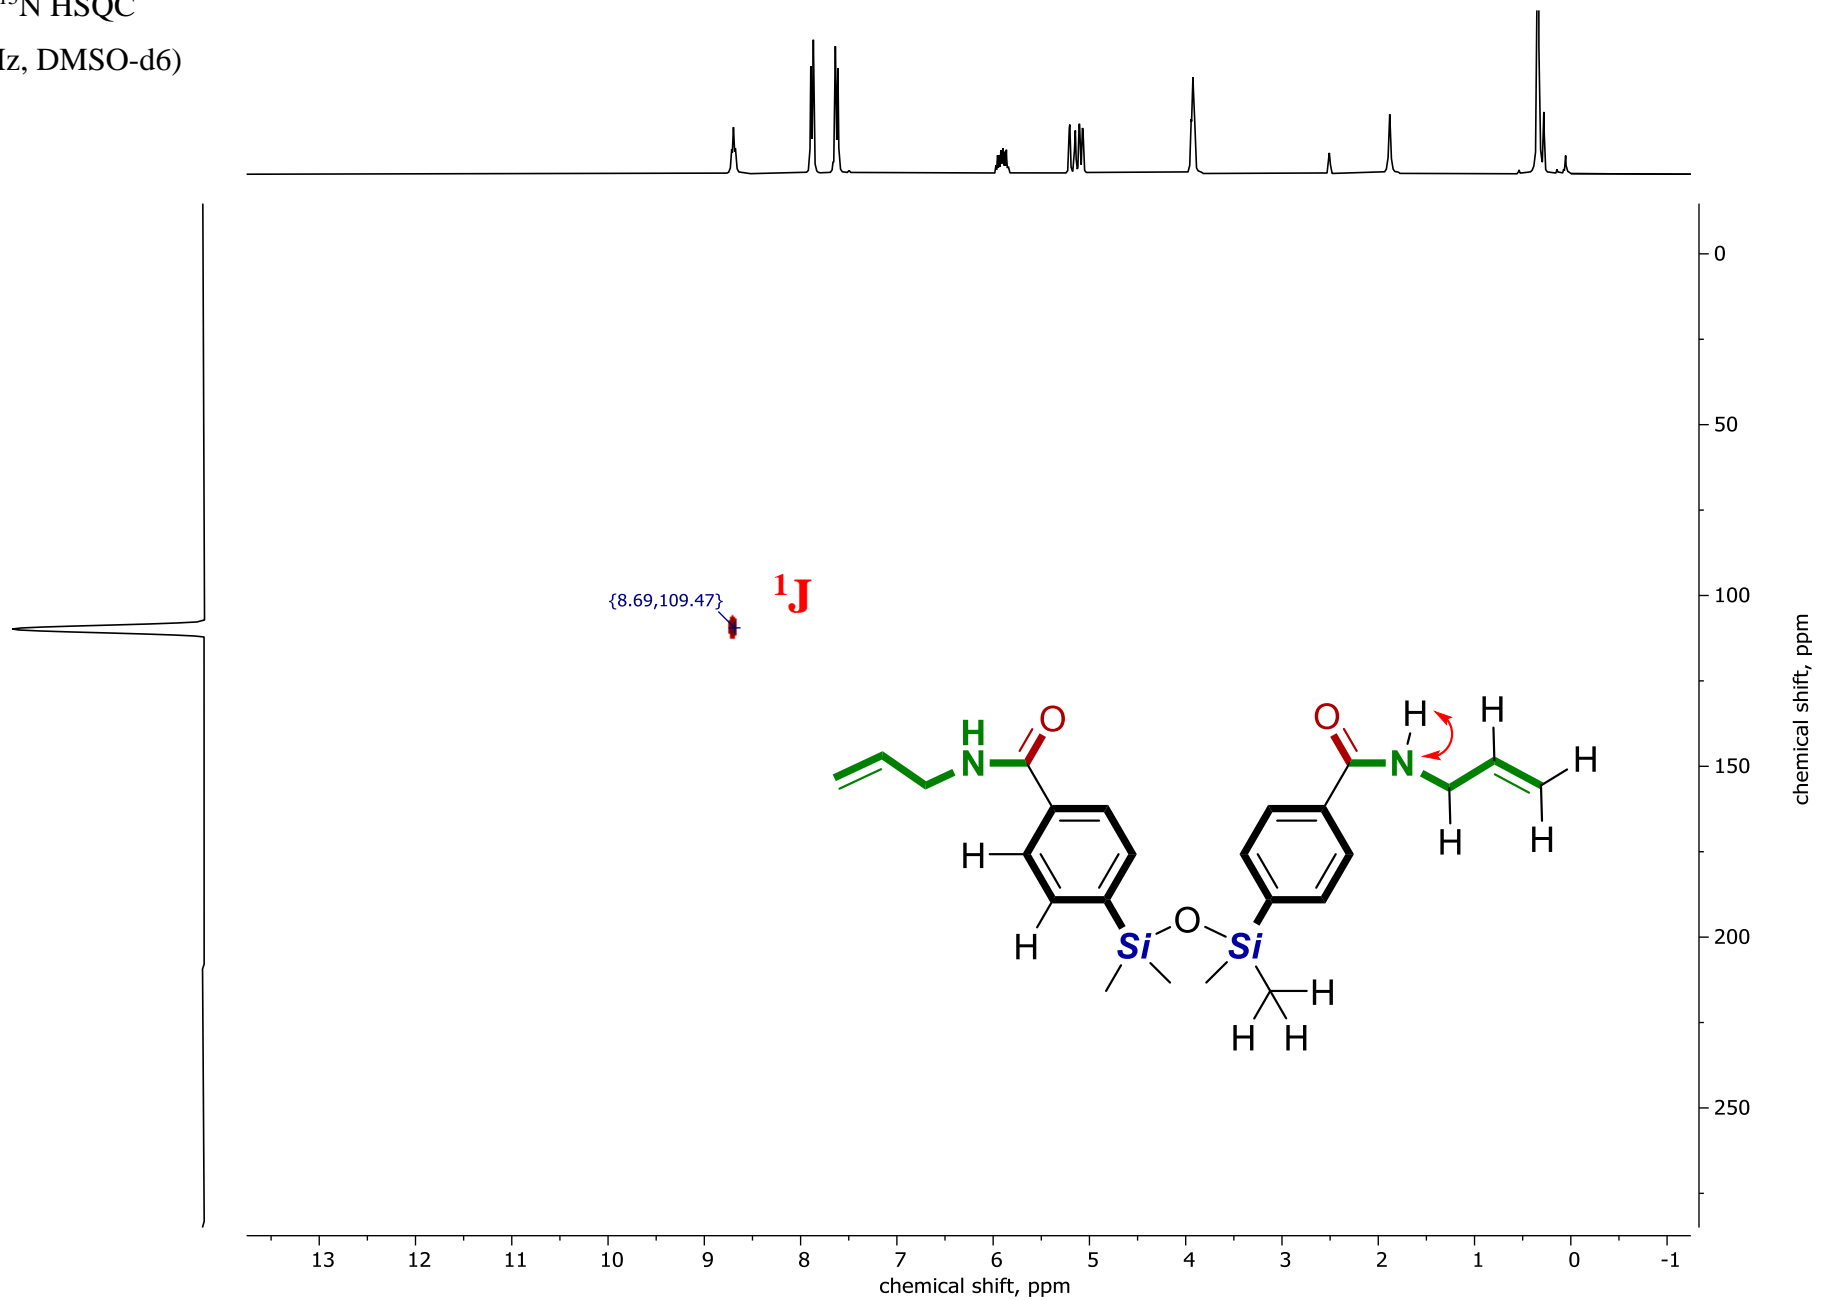

S72

IR-spectrum

— 3279

— 2953

— 1636

— 1539

— 1305

— 1254

~ 1107

~ 1070

~ 838

~ 796

~ 758

~ 668

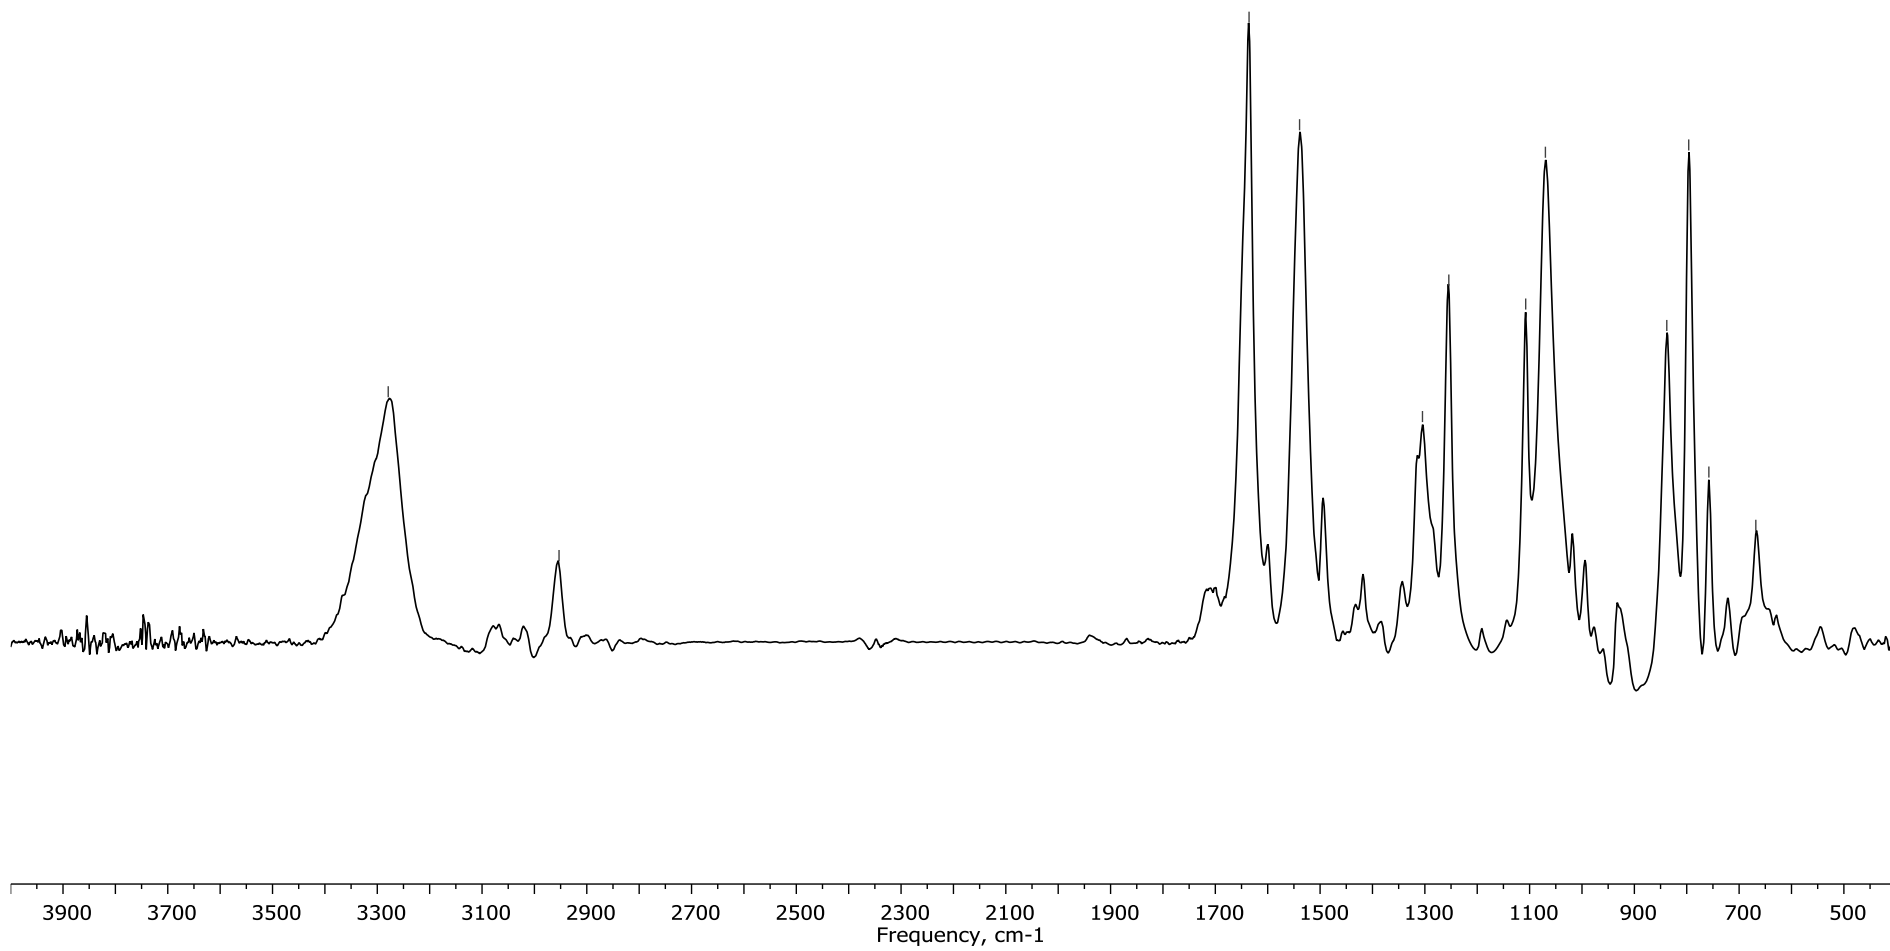



S73

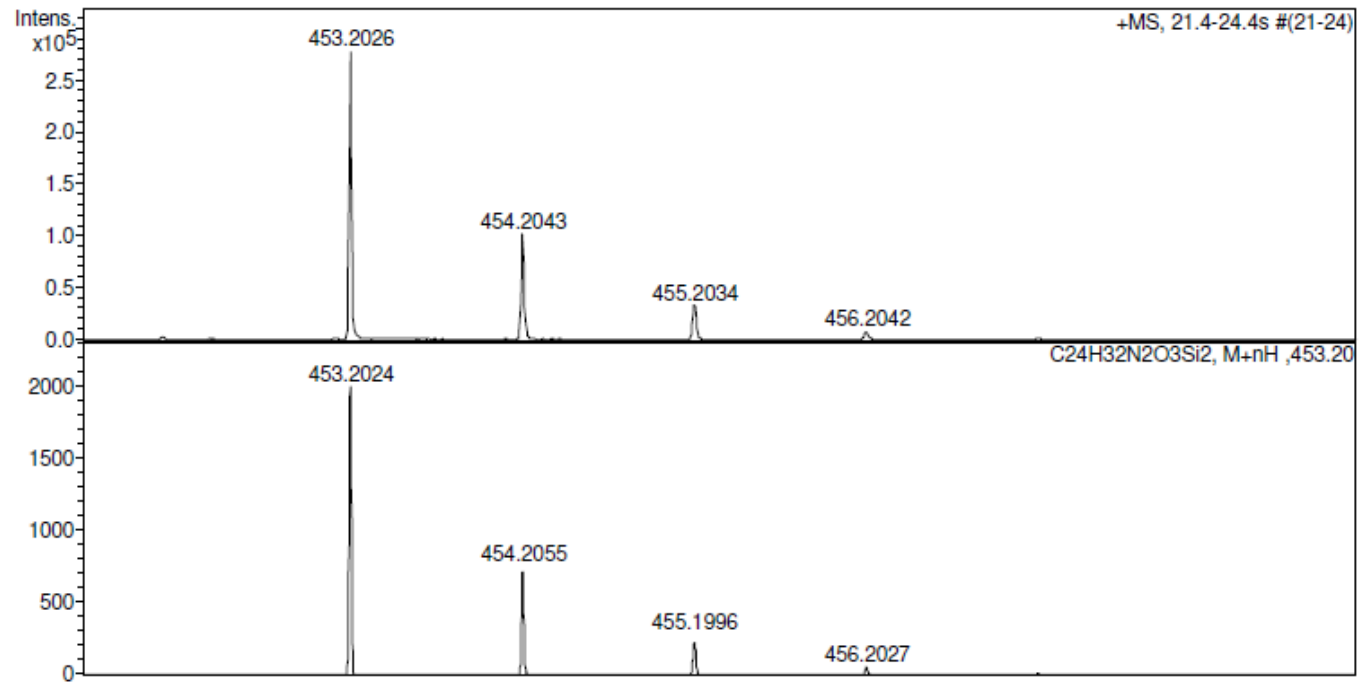

S74

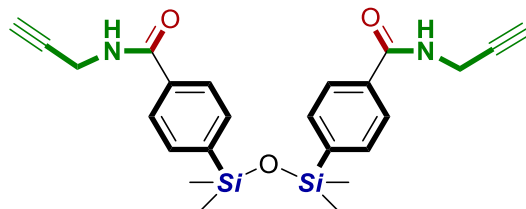

**Characterisation data for 4,4'-(1,1,3,3-tetramethyldisiloxane-1,3-diyl)bis(N-(prop-2-yn-1-yl)benzamide):**

$^1\text{H}$  NMR (400 MHz, DMSO- $d_6$ ):  $\delta$  = 8.93 (t,  $^3J=8$  Hz, 2H),  $\delta$  = 7.85 (d,  $^3J=11$  Hz, 4H),  $\delta$  = 7.63 (d,  $^3J=11$  Hz, 4H),  $\delta$  = 4.08-4.05 (m, 4H),  $\delta$  = 3.10 (t,  $^4J=3$  Hz, 2H),  $\delta$  = 0.33 (s, 12H).  $^{13}\text{C}$  NMR (100 MHz, DMSO- $d_6$ ):  $\delta$  = 165.91, 142.89, 134.68, 132.78, 126.45, 81.26, 72.79, 28.47, 0.63.  $^{29}\text{Si}$  NMR (80 MHz, DMSO- $d_6$ ):  $\delta$  = -0.49.  $^{15}\text{N}$  NMR (40 MHz, DMSO- $d_6$ ):  $\delta$  = 107.75. HRMS (ESI)  $m/z$   $[\text{M} + \text{H}]^+$  : calcd for  $[\text{C}_{24}\text{H}_{28}\text{N}_2\text{O}_3\text{Si}_2 + \text{H}]^+$ , 449.1711; found, 449.1729. IR ( $\text{cm}^{-1}$ ): 3339, 3234, 1640, 1543, 1313, 1258, 1112, 1065, 838, 794.

<sup>1</sup>H NMR

(400 MHz, DMSO-d6)

S75

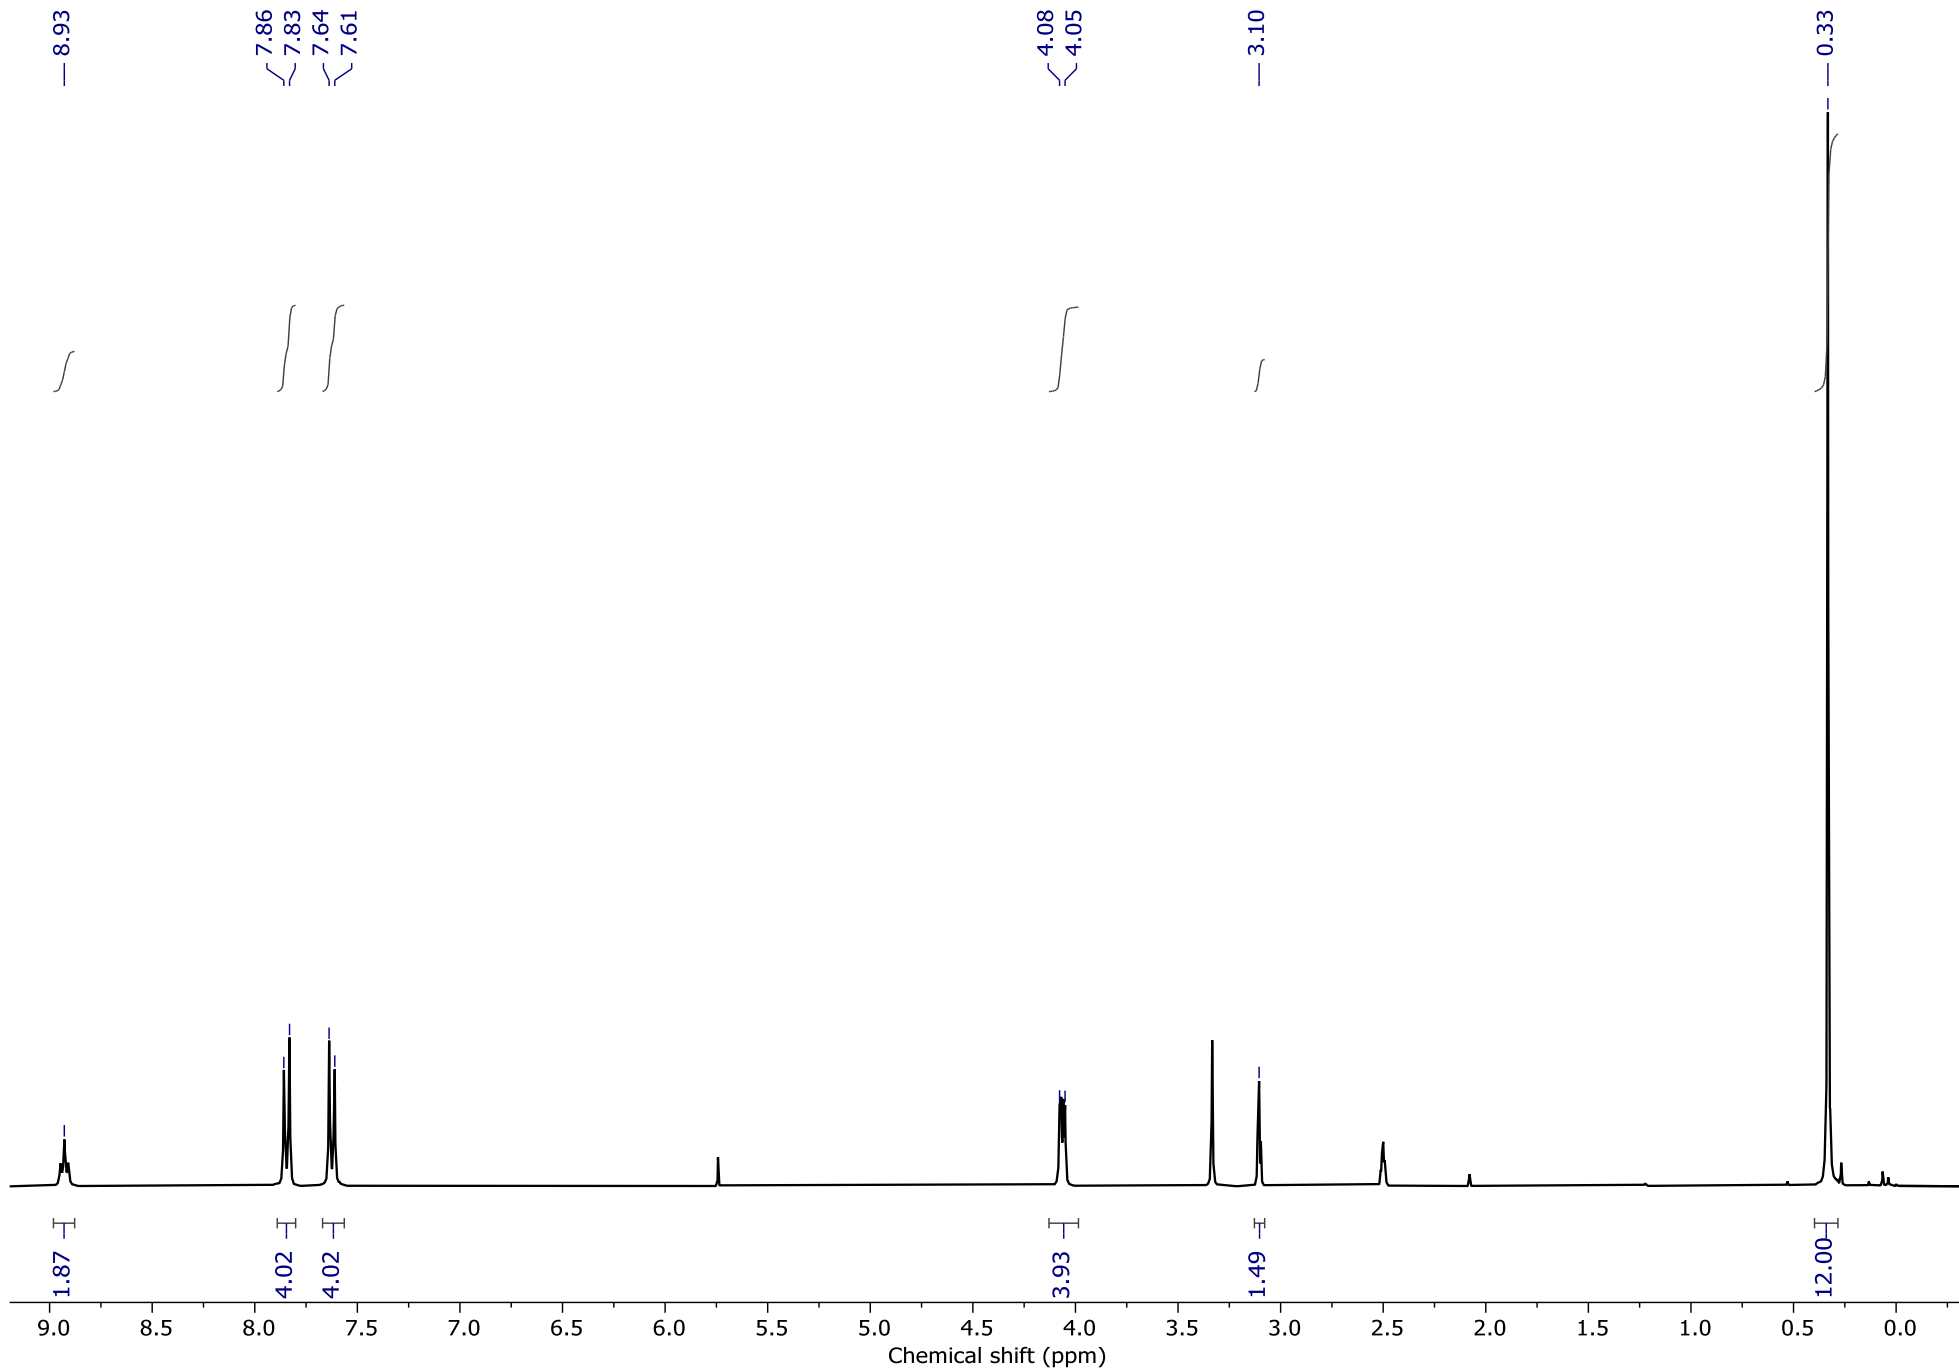

$^{13}\text{C}$  NMR

(100 MHz, DMSO-d6)

S76

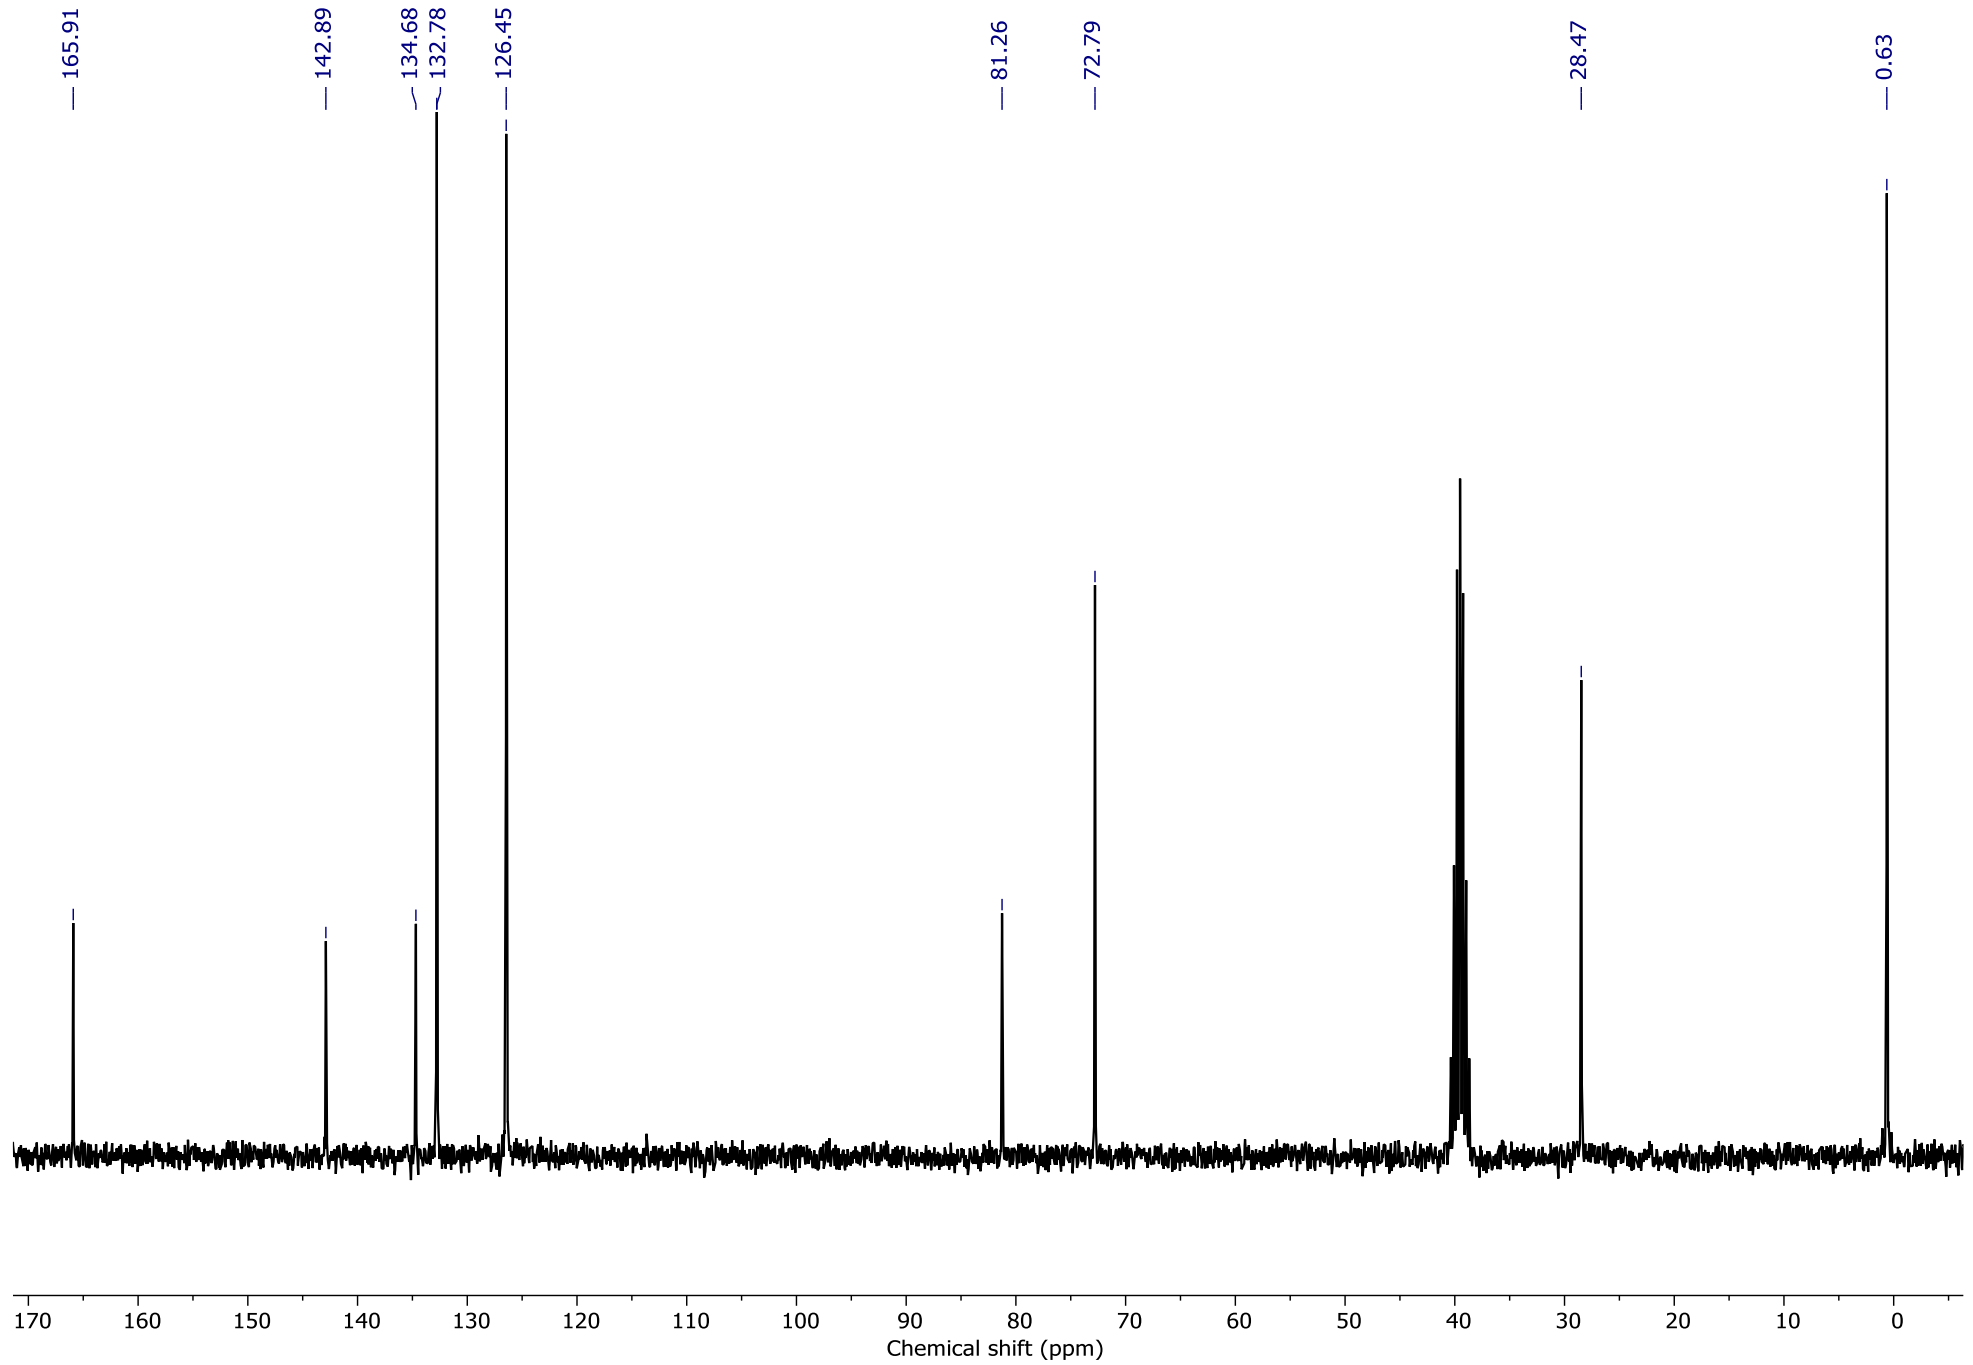

$^{29}\text{Si}$  NMR  
(80 MHz, DMSO-d6)

S77

-0.49

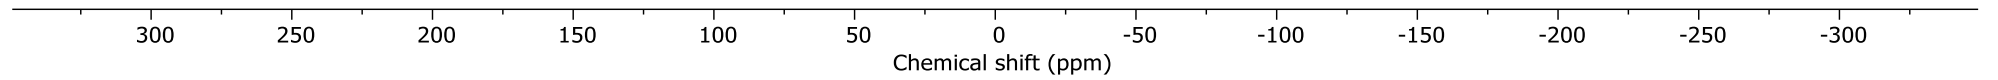

$^{15}\text{N}$  NMR  
(reconstructed, 40 MHz,  
DMSO-d<sub>6</sub>)

S78

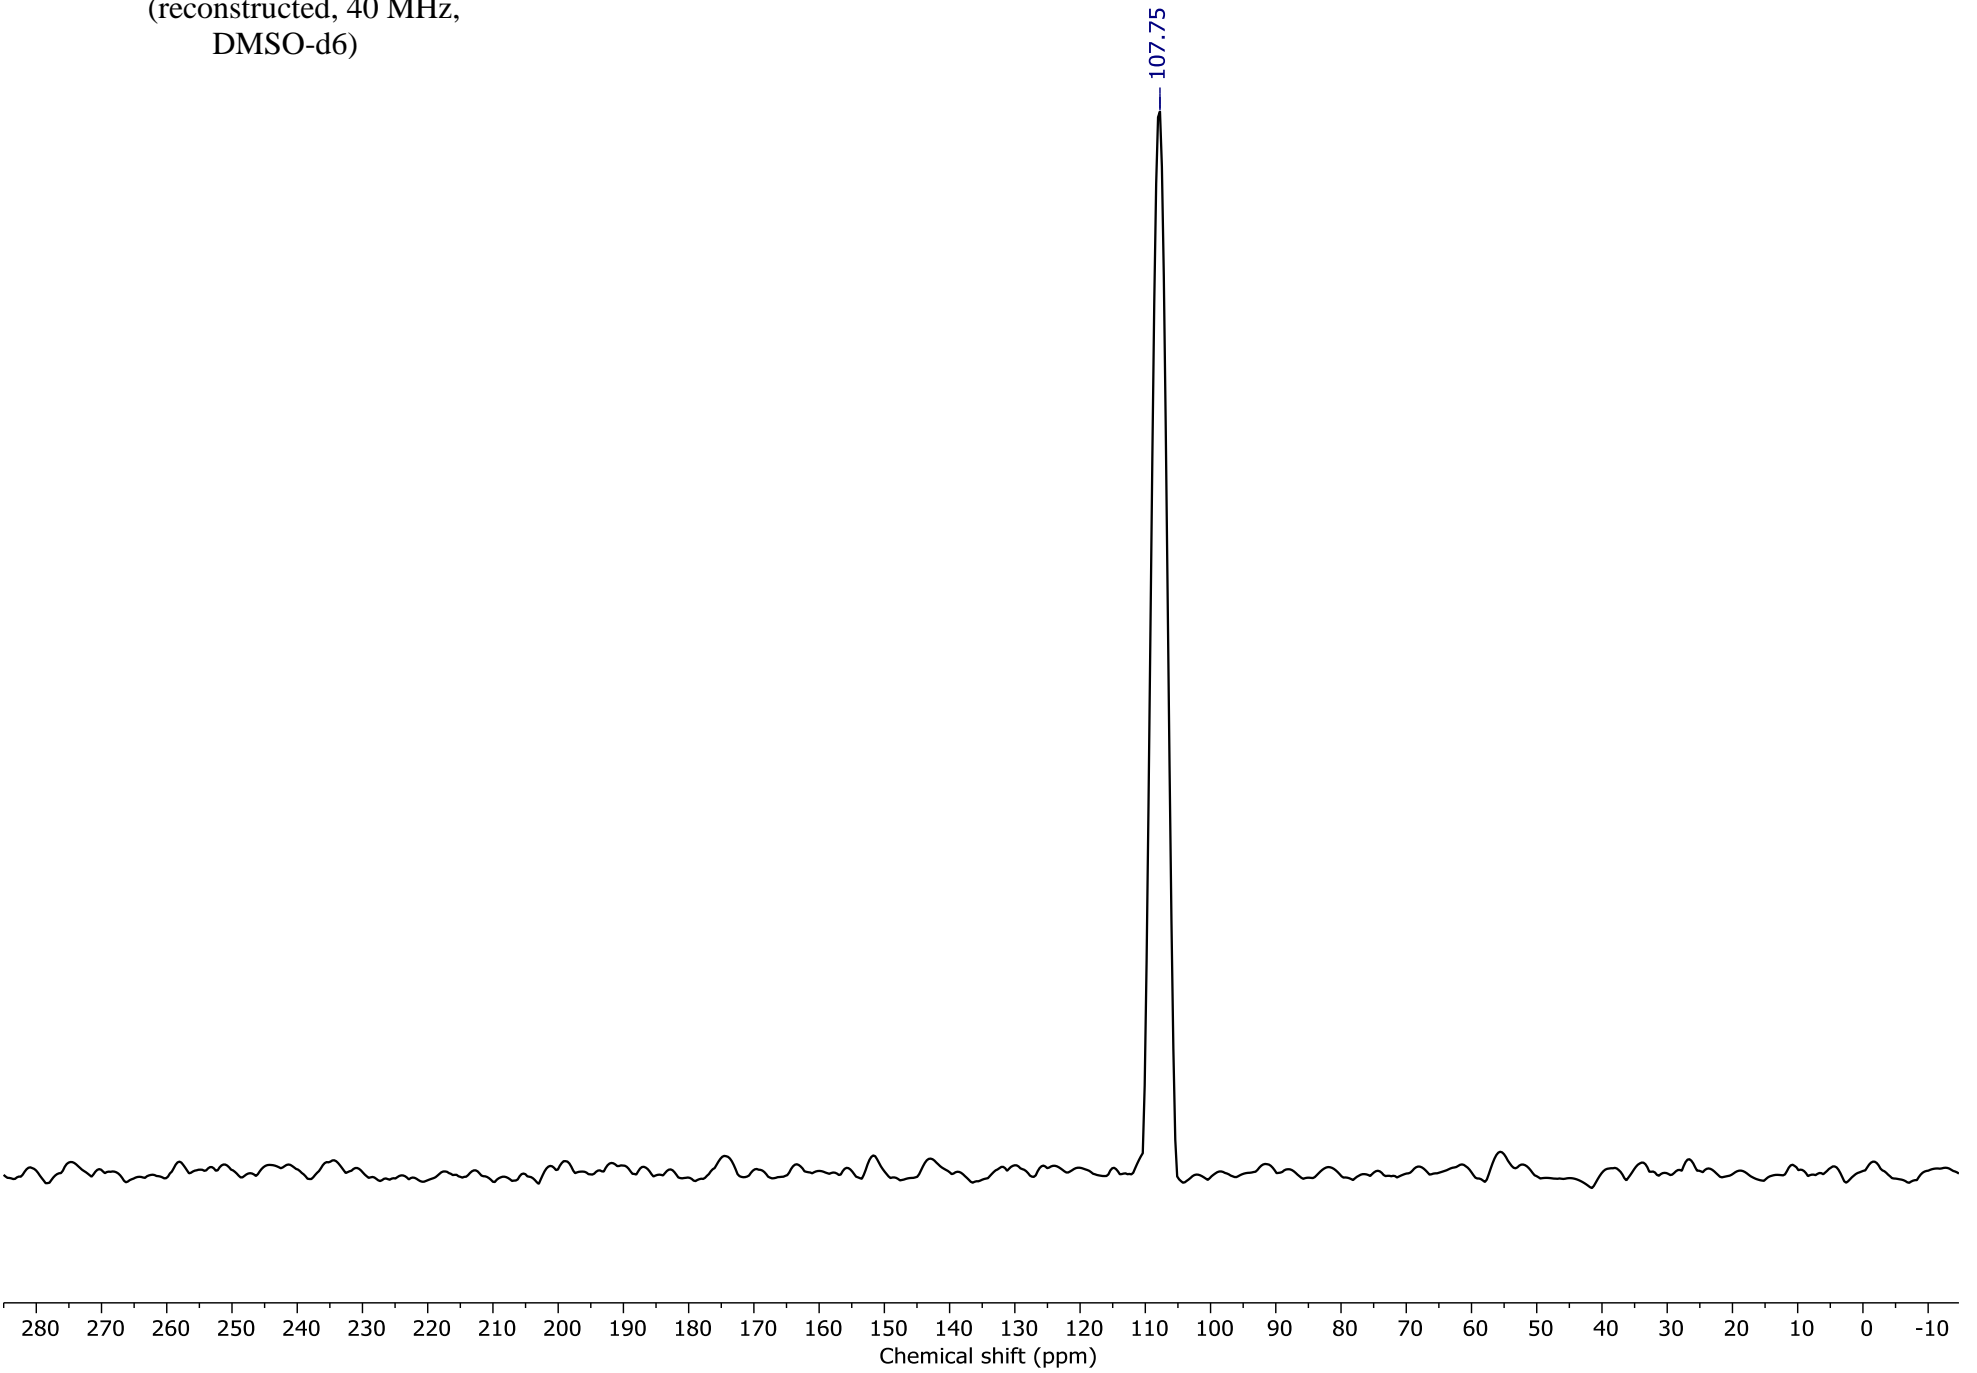

$^1\text{H} - ^{13}\text{C}$  HMBC  
(400 MHz, DMSO-d<sub>6</sub>)

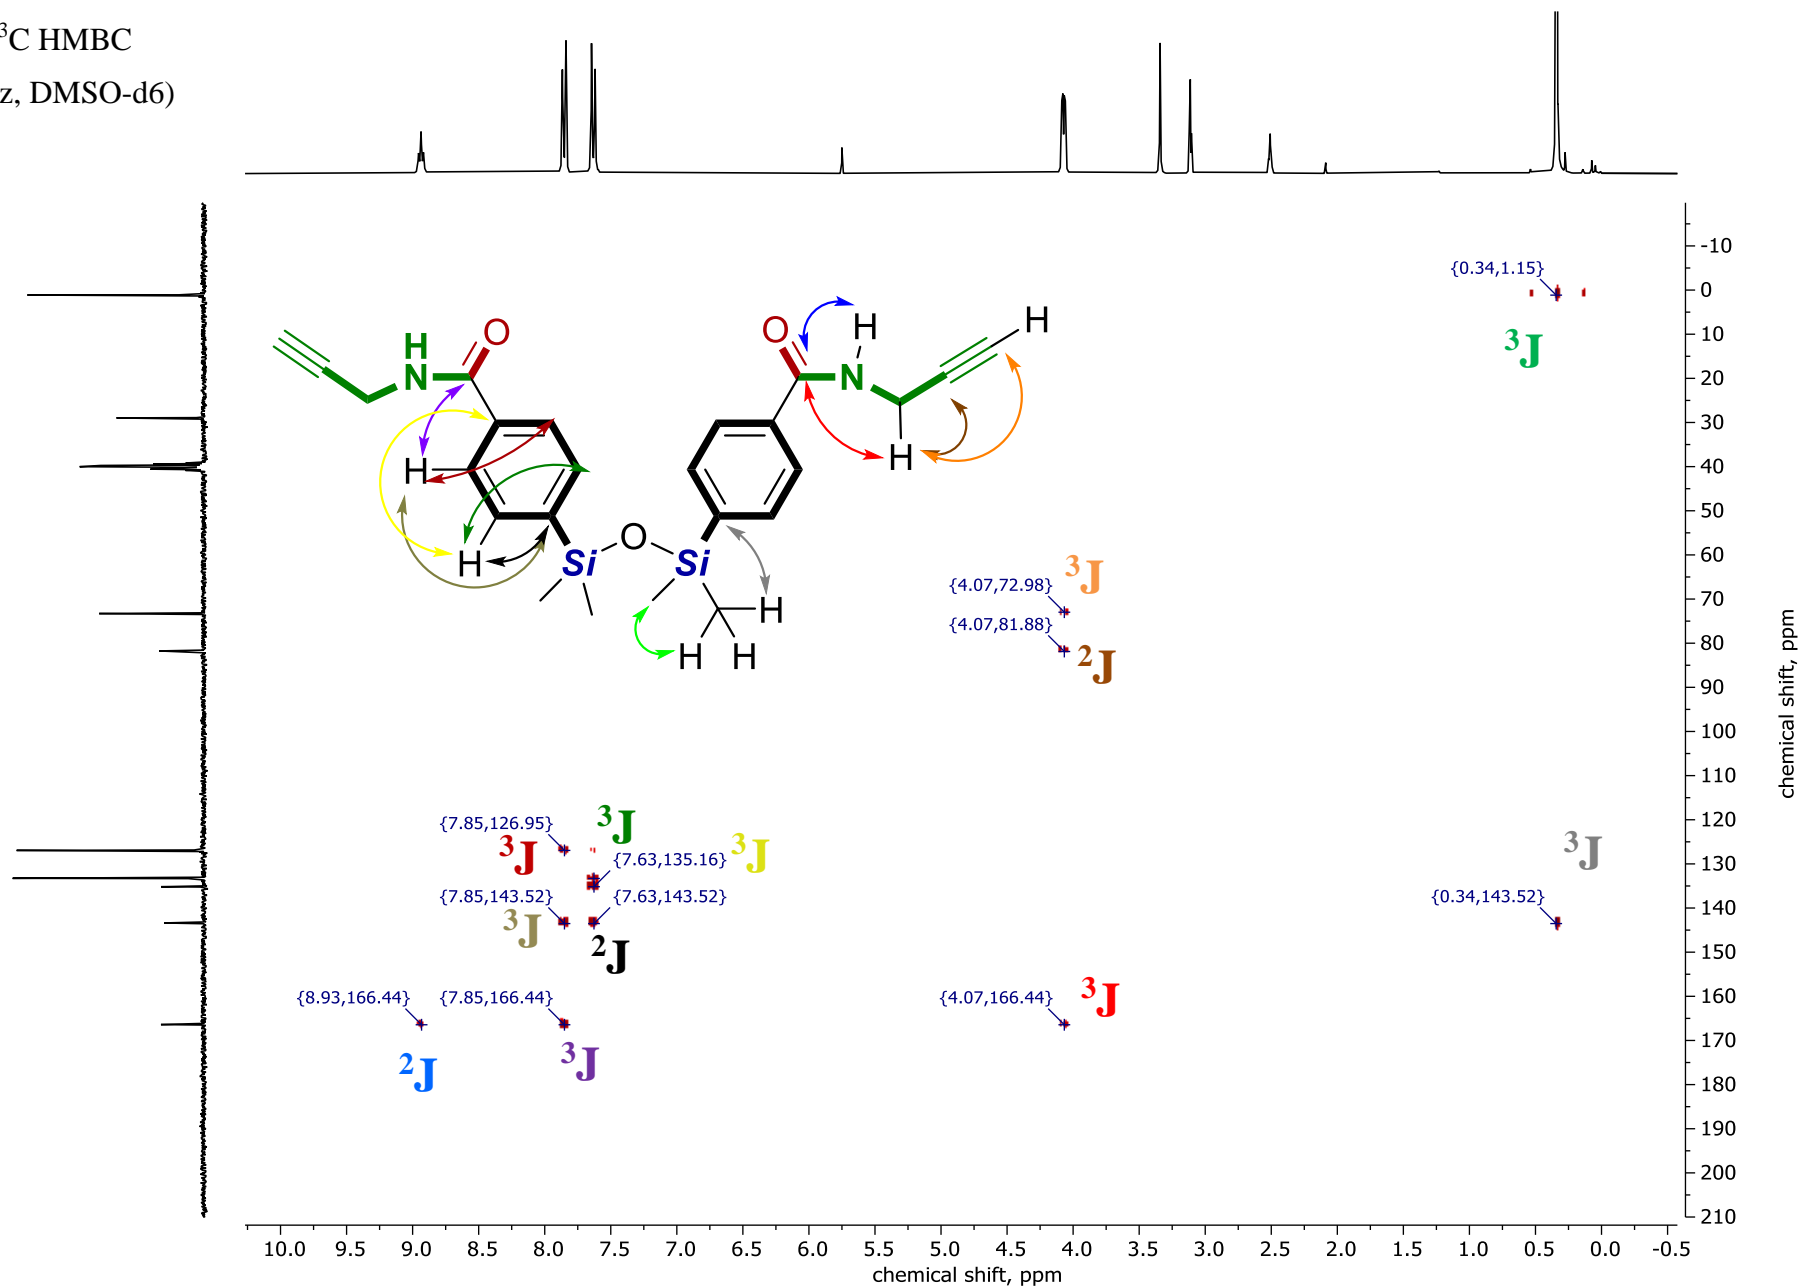

S80

$^1\text{H} - ^{13}\text{C}$  HSQC  
(400 MHz, DMSO-d6)

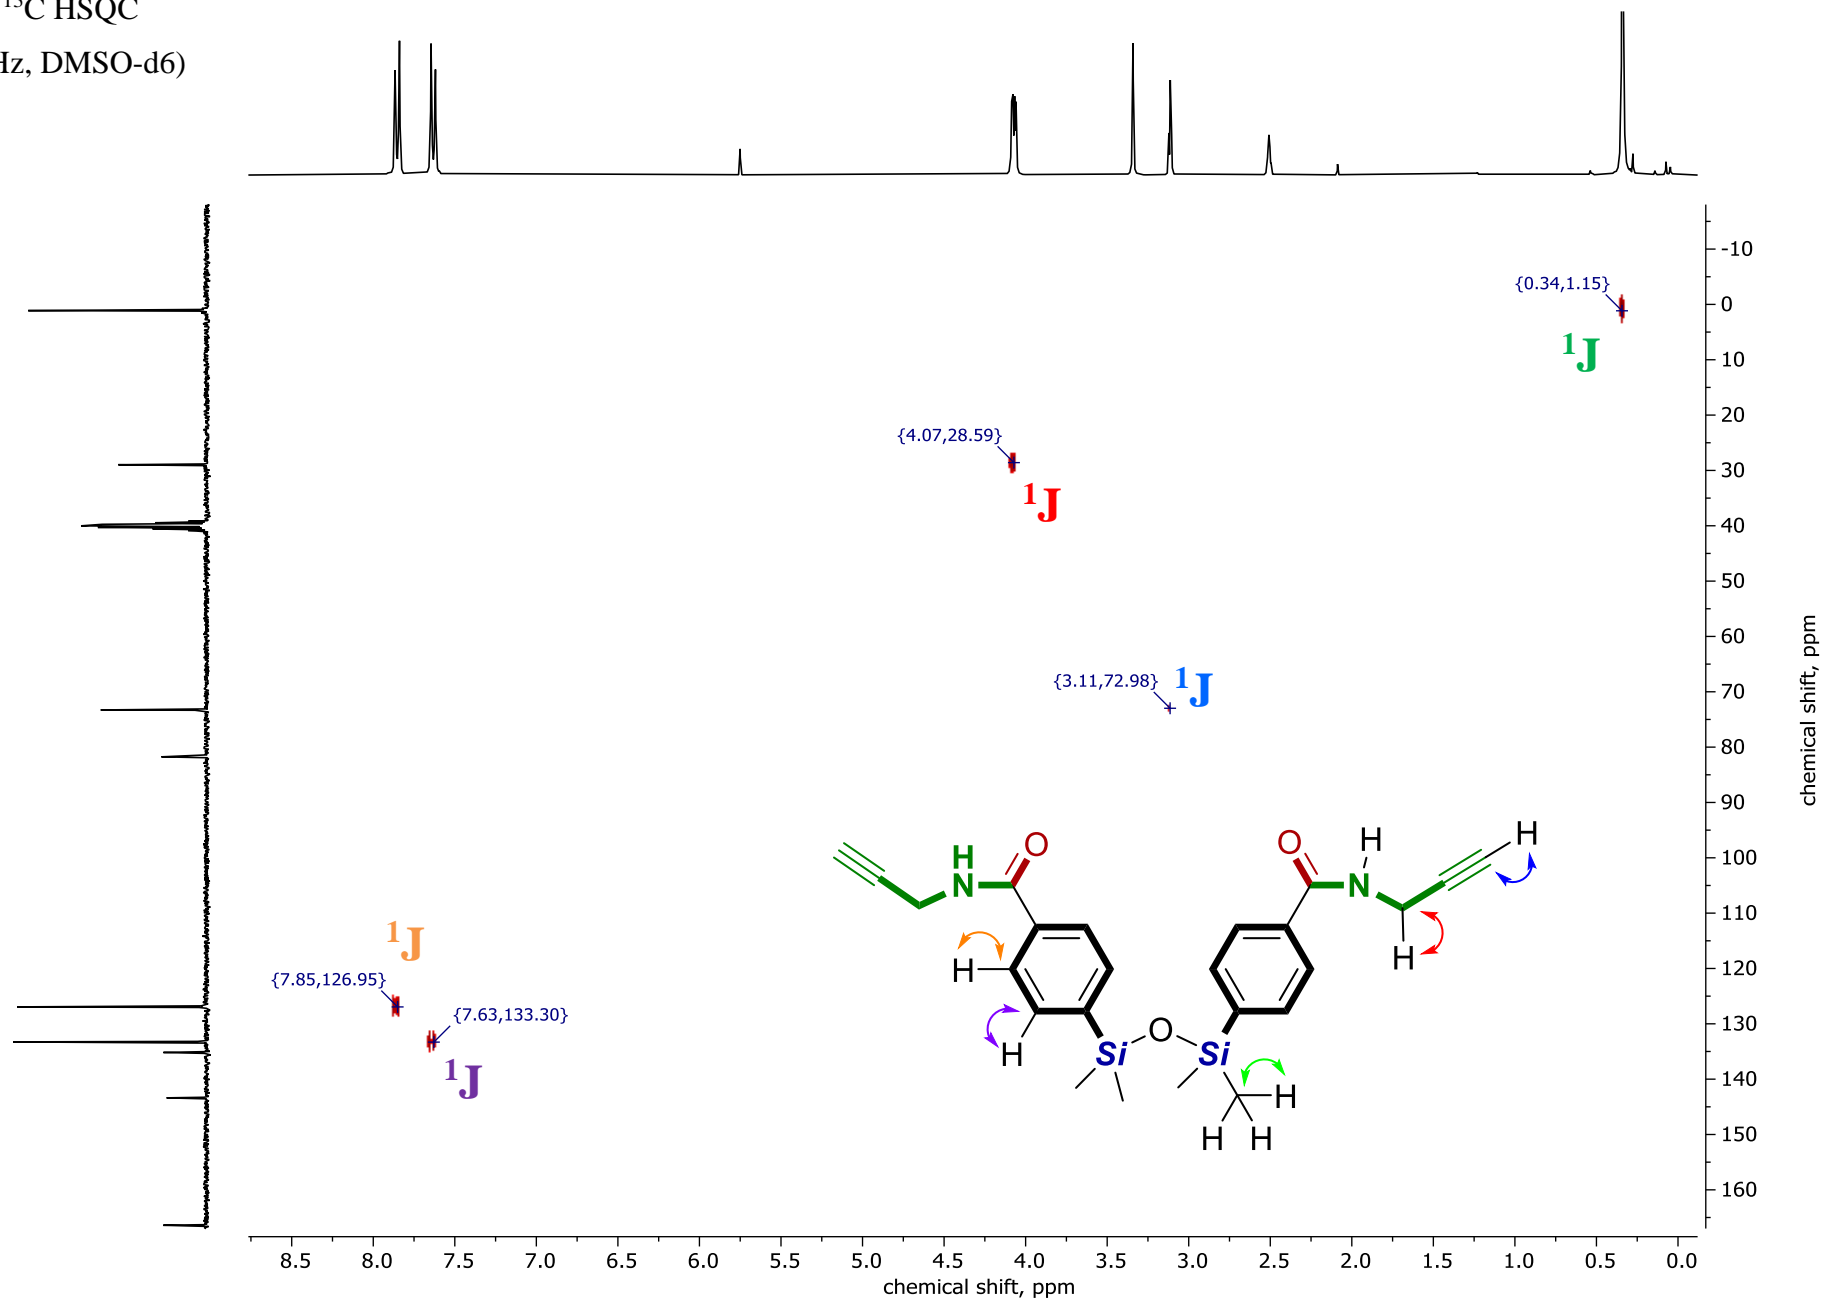



S81

$^1\text{H} - ^{29}\text{Si}$  HMBC  
(400 MHz, DMSO-d6)

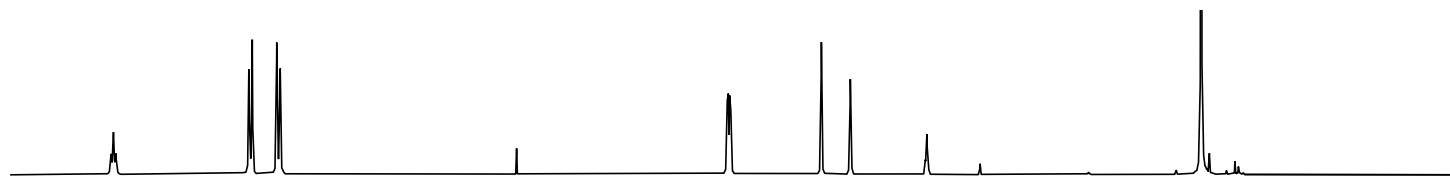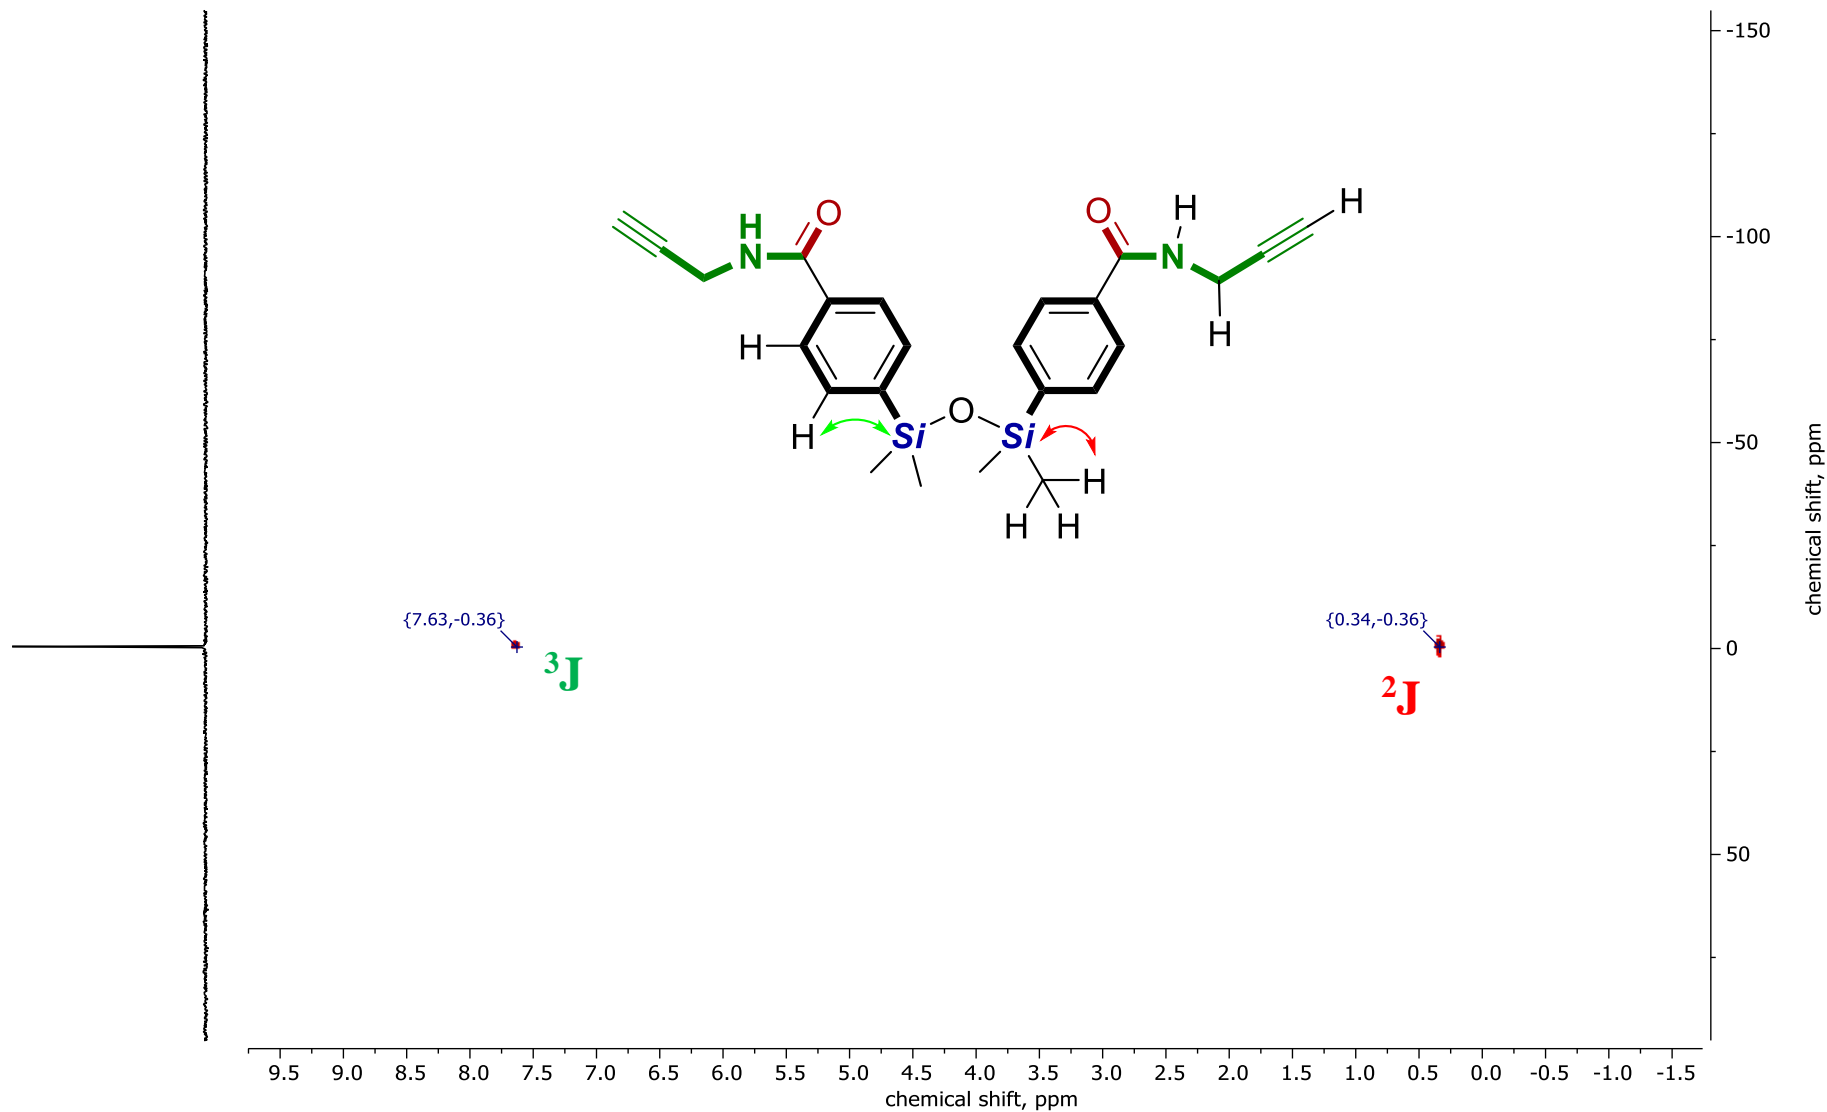

S82

$^1\text{H} - ^{15}\text{N}$  HMBC  
(400 MHz, DMSO-d<sub>6</sub>)

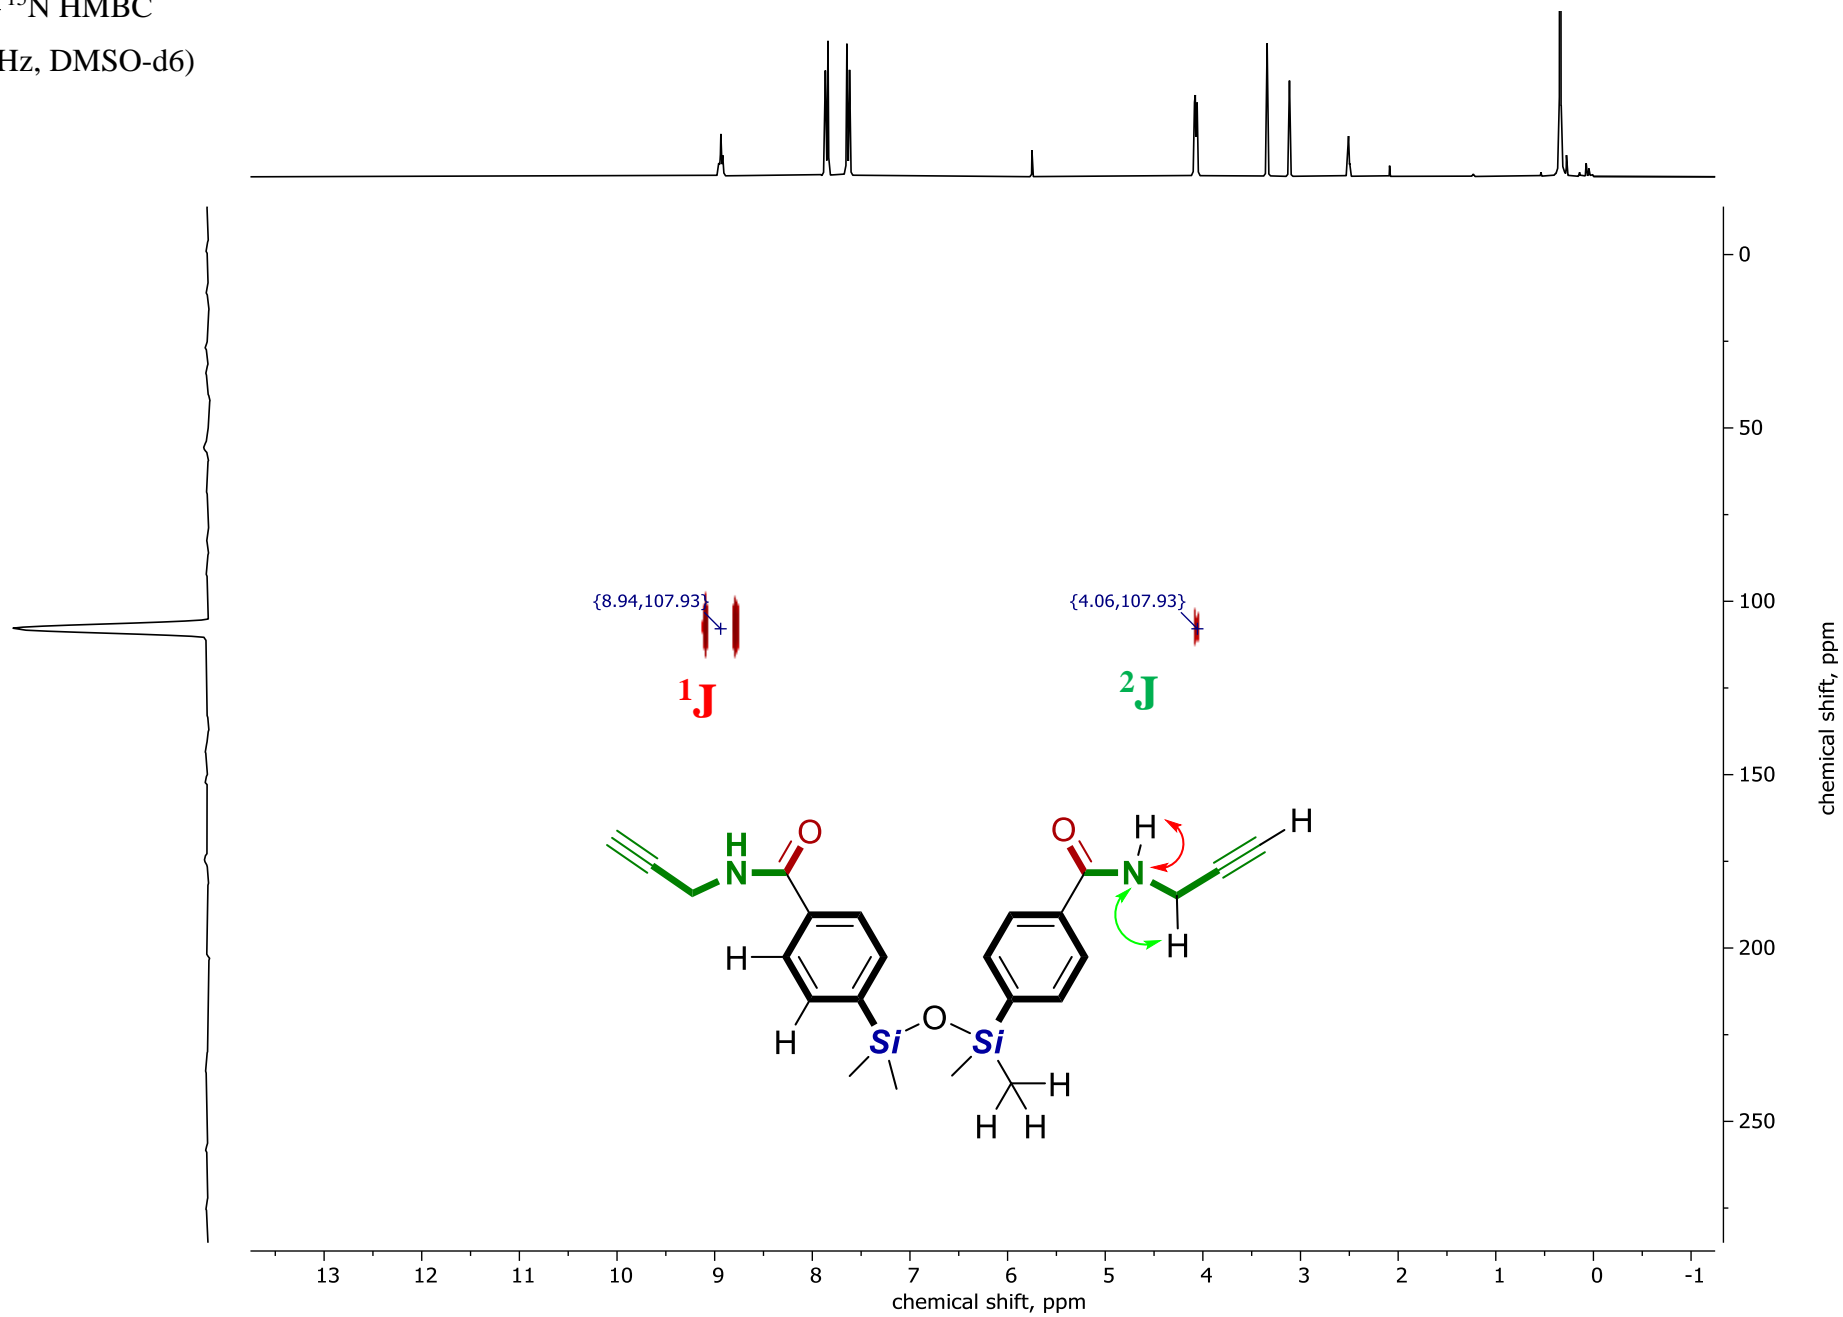

S83

$^1\text{H} - ^{15}\text{N}$  HSQC  
(400 MHz, DMSO-d6)

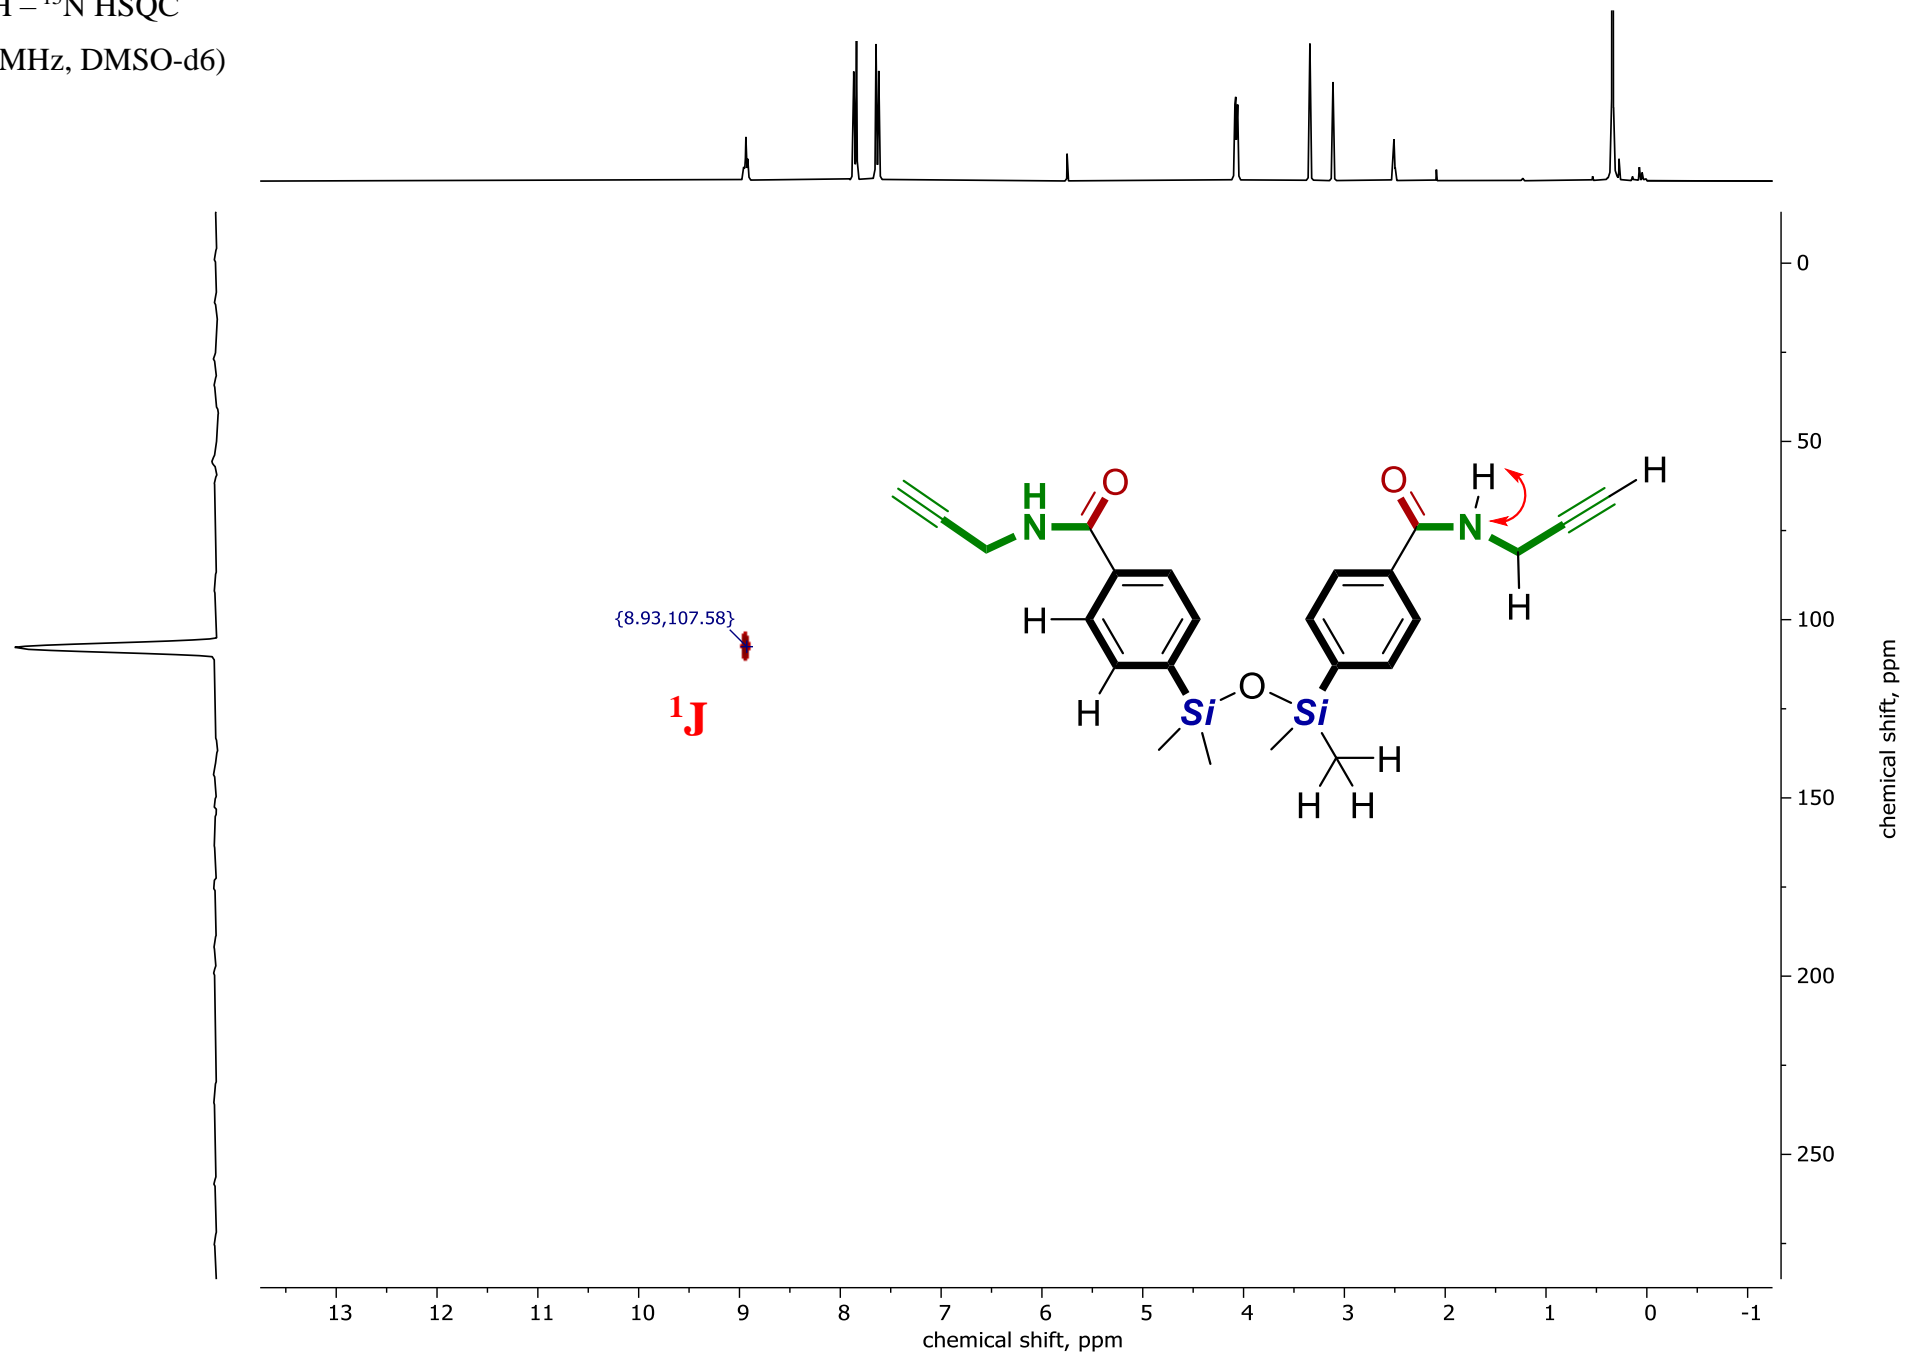

S84

IR-spectrum

— 3339

— 3234

— 1640

— 1543

— 1313

— 1258

— 1112

— 1065

— 838

— 794

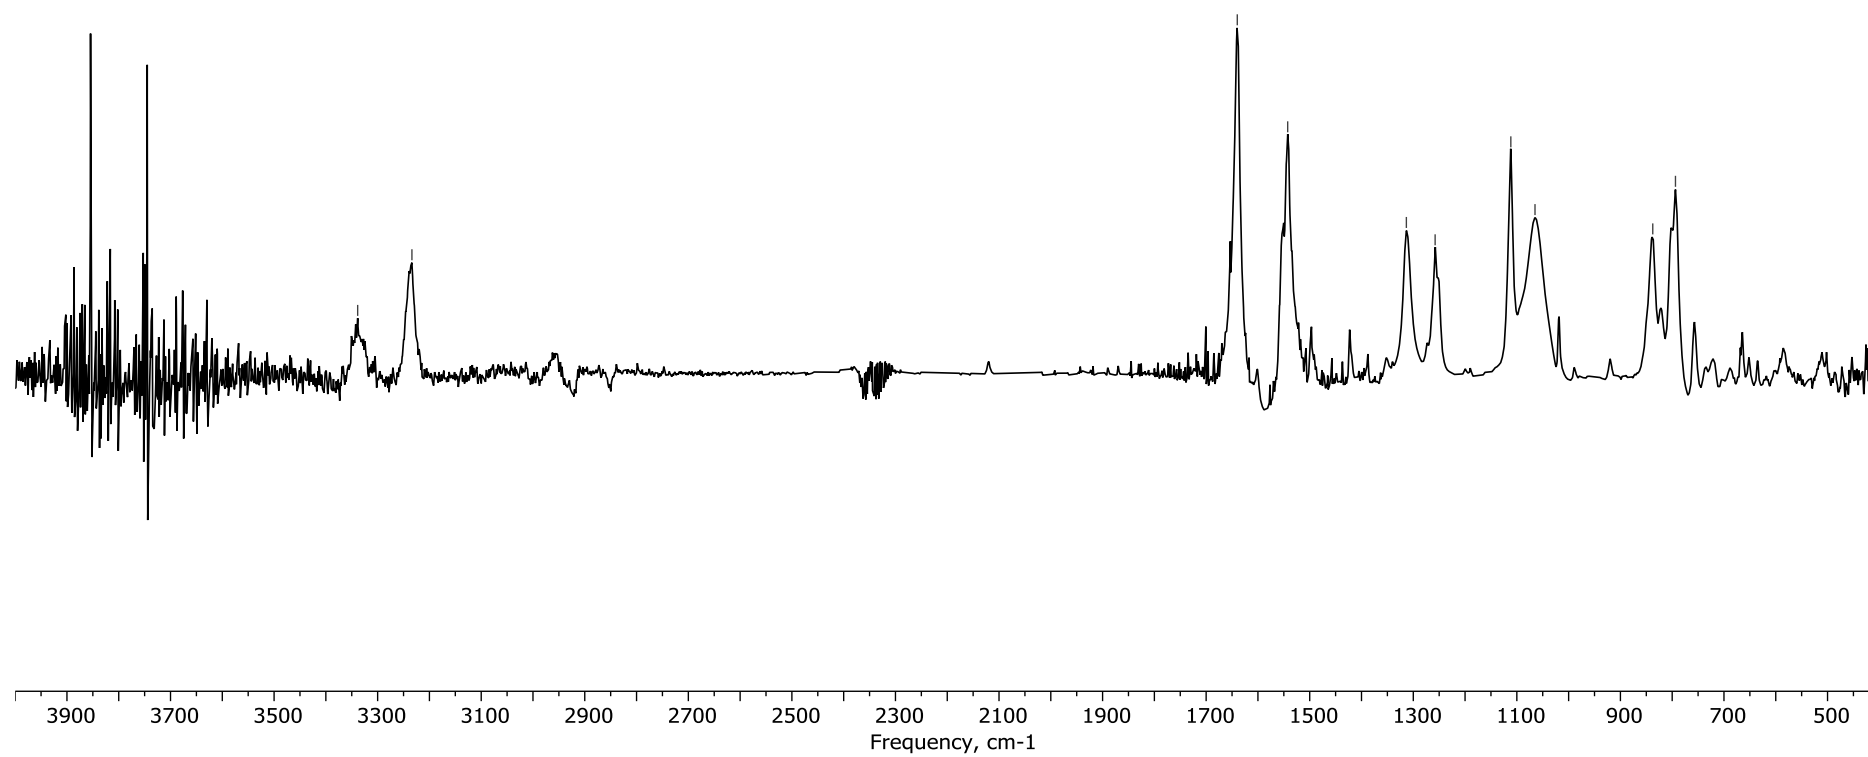

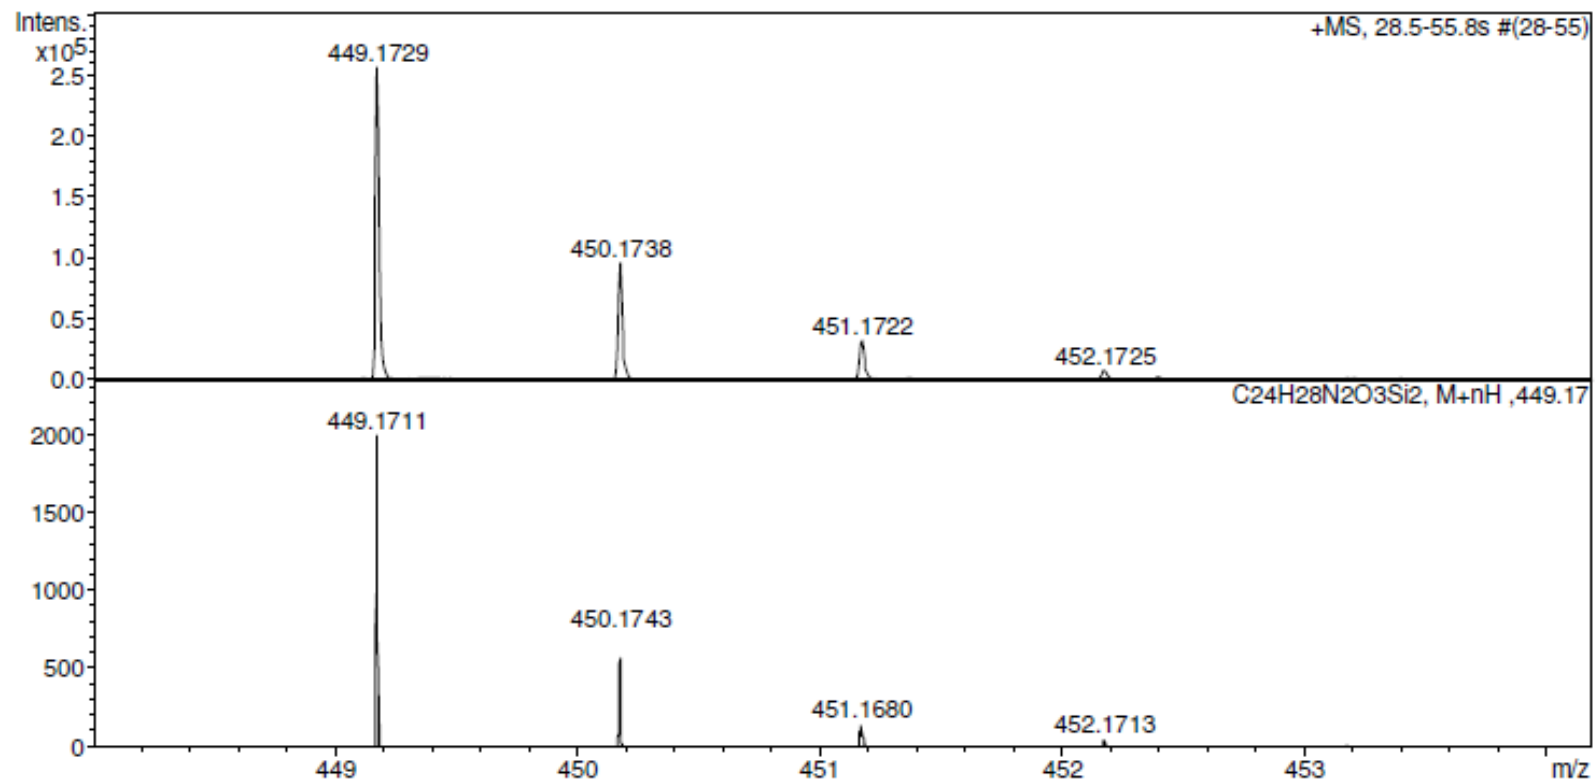

S86

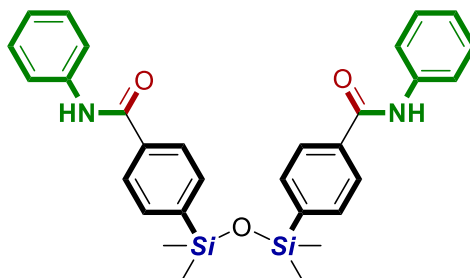

**Characterisation data for 4,4'-(1,1,3,3-tetramethyldisiloxane-1,3-diyl)bis(N-phenylbenzamide):**

$^1\text{H}$  NMR (400 MHz, DMSO- $d_6$ ):  $\delta$  = 10.28 (s, 2H),  $\delta$  = 7.98 (d,  $^3J=11$  Hz, 4H),  $\delta$  = 7.82 (d,  $^3J=10$  Hz, 4H),  $\delta$  = 7.71 (d,  $^3J=11$  Hz, 4H),  $\delta$  = 7.36 (t,  $^3J=10$  Hz, 4H),  $\delta$  = 7.10 (t,  $^3J=10$  Hz, 2H),  $\delta$  = 0.39 (s, 12H).  $^{13}\text{C}$  NMR (100 MHz, DMSO- $d_6$ ):  $\delta$  = 166.57, 143.02, 139.16, 135.94, 132.77, 128.56, 126.88, 123.64, 120.34, 0.69.  $^{29}\text{Si}$  NMR (80 MHz, DMSO- $d_6$ ):  $\delta$  = -0.45.  $^{15}\text{N}$  NMR (40 MHz, DMSO):  $\delta$  = 129.14. HRMS (ESI)  $m/z$   $[\text{M} + \text{H}]^+$ : calcd for  $[\text{C}_{30}\text{H}_{32}\text{N}_2\text{O}_3\text{Si}_2 + \text{H}]^+$ , 525.2024; found, 525.2082;  $[\text{M} + \text{K}]^+$ : calcd for  $[\text{C}_{30}\text{H}_{32}\text{N}_2\text{O}_3\text{Si}_2 + \text{K}]^+$ , 563.1583; found, 563.1574;  $[\text{M} + \text{Na}]^+$ : calcd for  $[\text{C}_{30}\text{H}_{32}\text{N}_2\text{O}_3\text{Si}_2 + \text{Na}]^+$ , 547.1844; found, 547.1843;  $[\text{M} + \text{NH}_4]^+$ : calcd for  $[\text{C}_{30}\text{H}_{32}\text{N}_2\text{O}_3\text{Si}_2 + \text{NH}_4]^+$ , 542.2290; found, 542.2286. IR ( $\text{cm}^{-1}$ ): 3268-2958, 1648, 1599, 1542, 1443, 1329, 1258, 1050, 832-758.

<sup>1</sup>H NMR  
(400 MHz, DMSO-d<sub>6</sub>)

S87

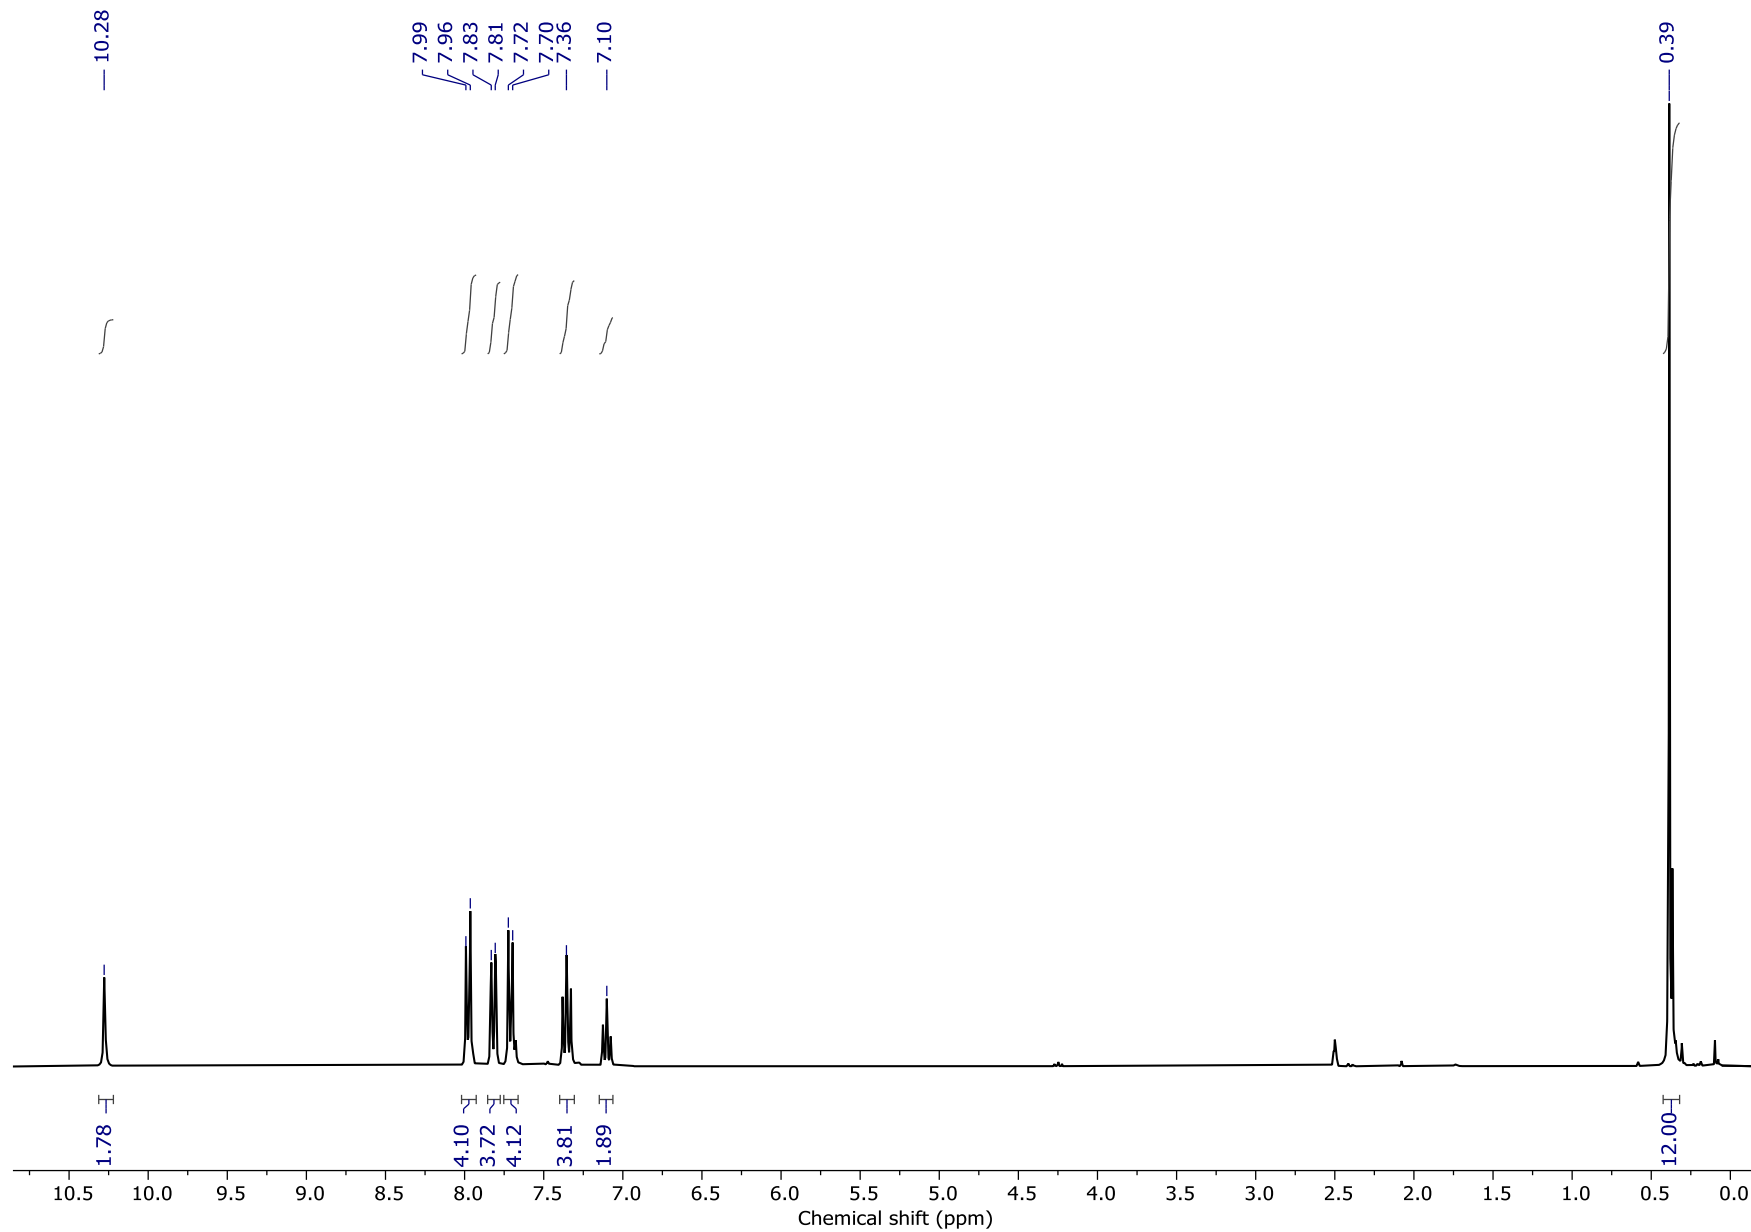

<sup>13</sup>C NMR

(100 MHz, DMSO-d6)

S88

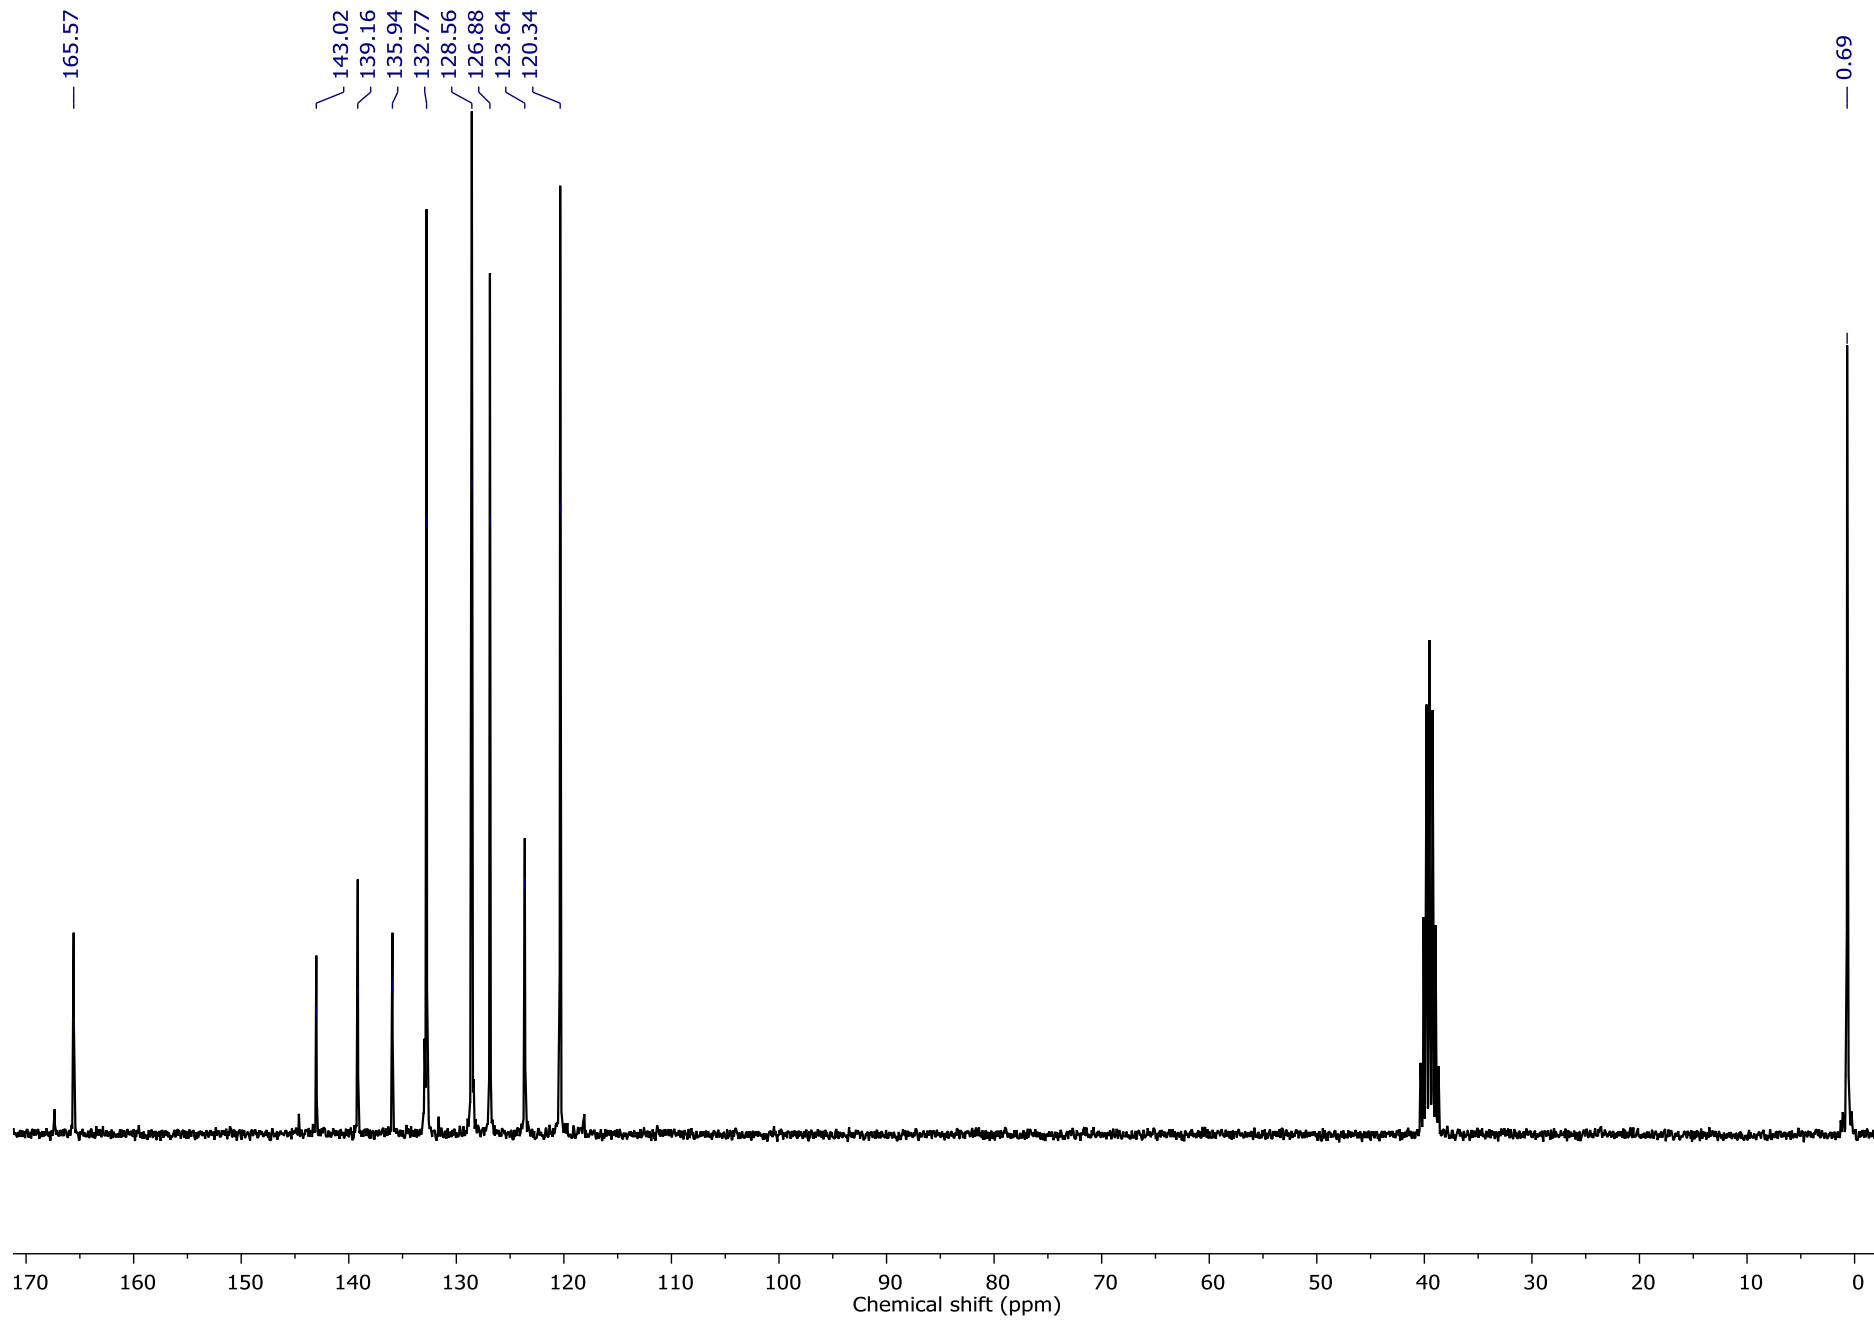



$^{29}\text{Si}$  NMR  
(80 MHz, DMSO-d<sub>6</sub>)

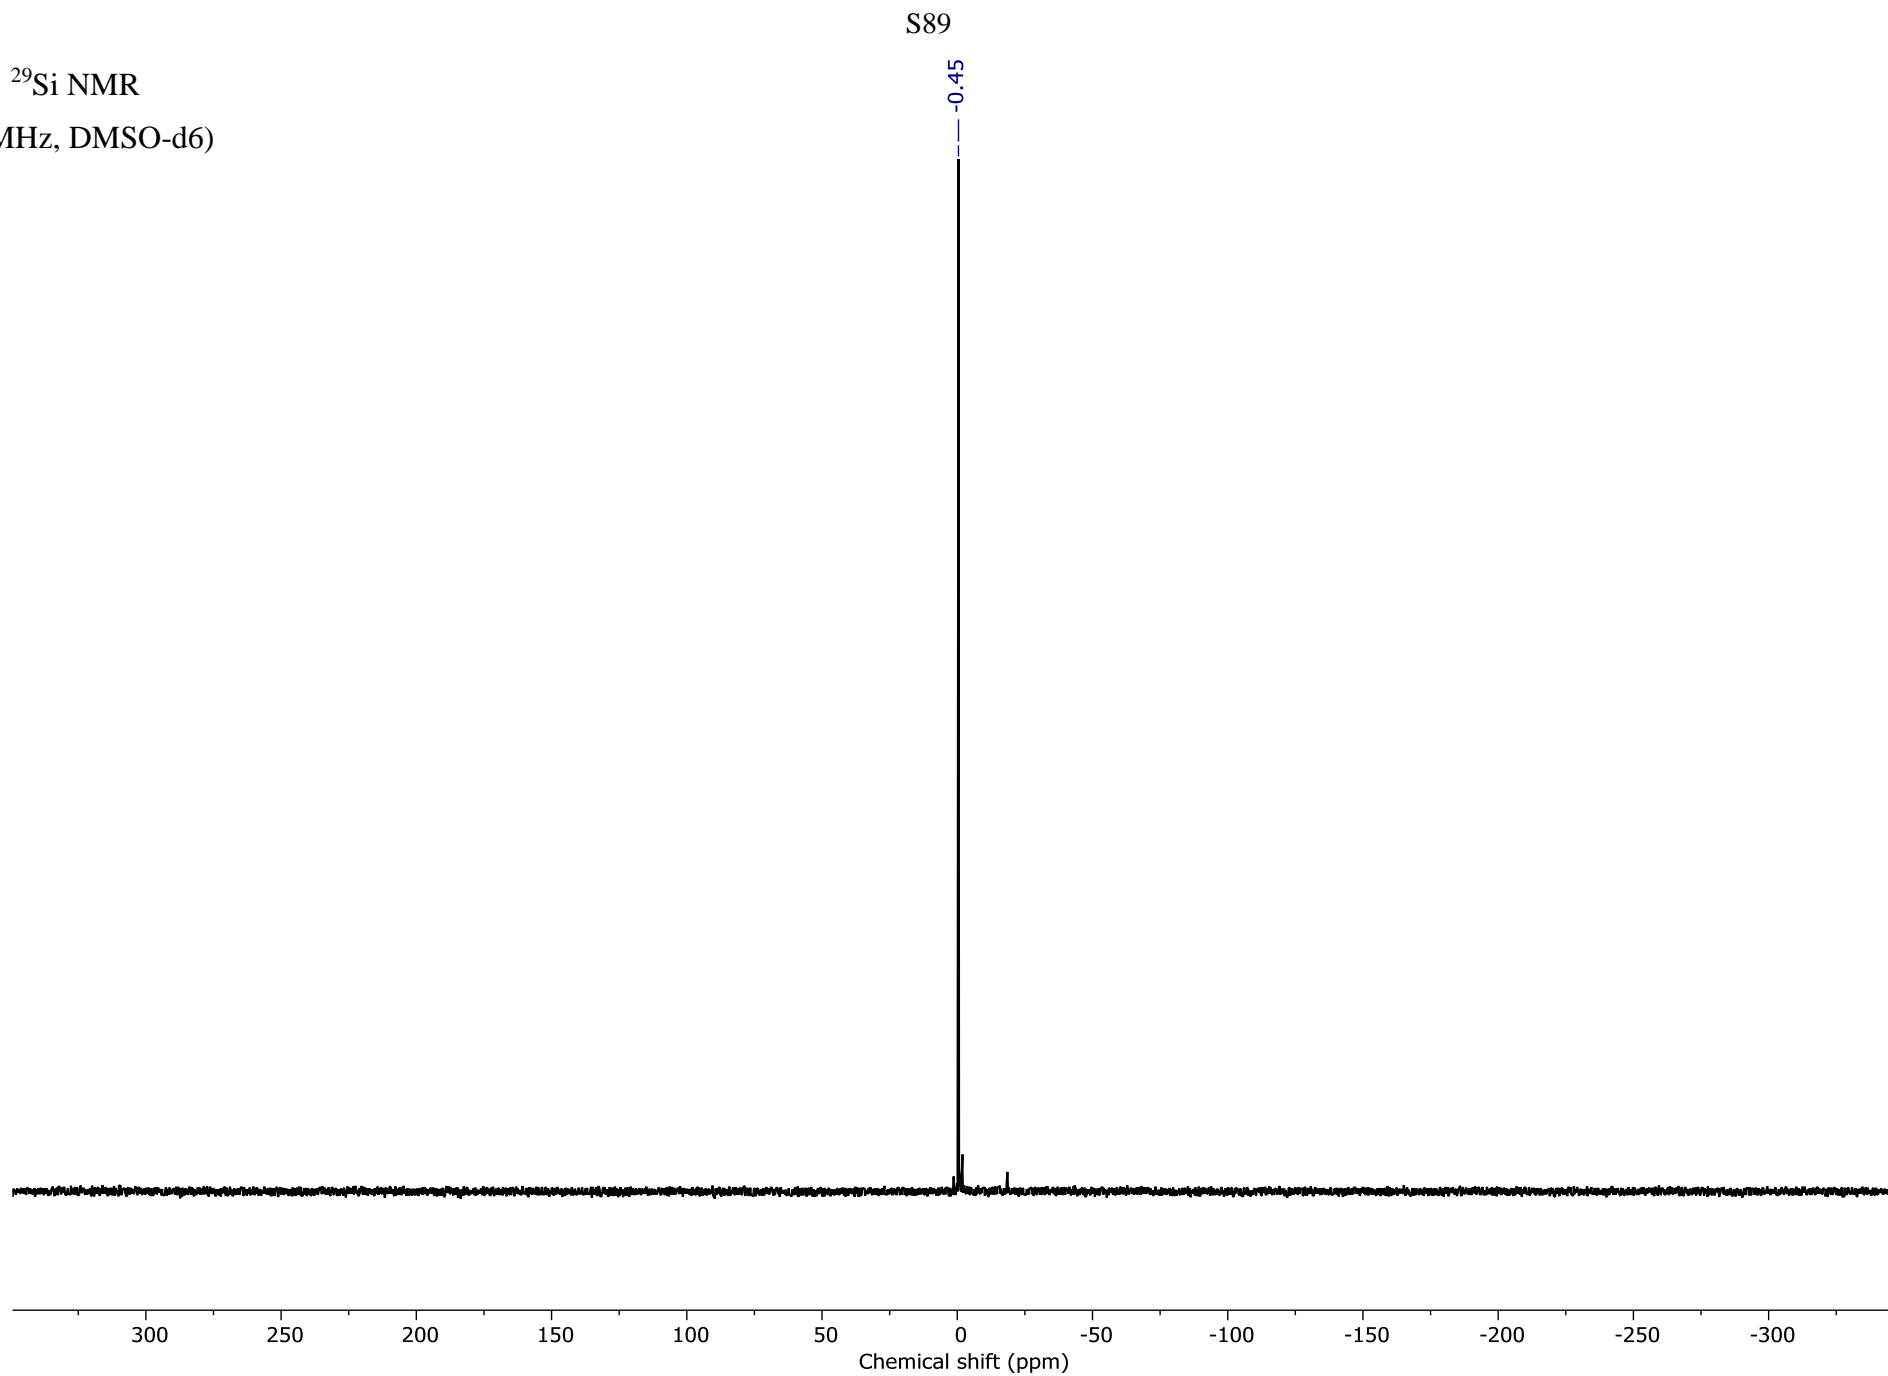

$^{15}\text{N}$  NMR  
(reconstructed, 40 MHz,  
DMSO-d6)

S90

129.14

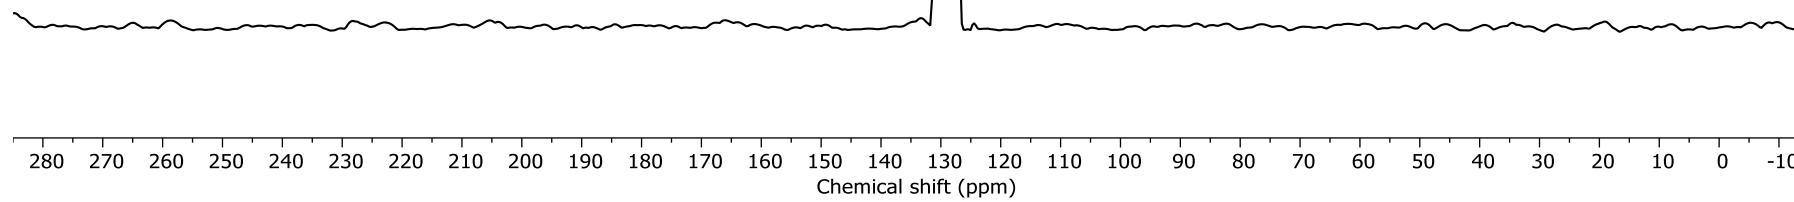

$^1\text{H} - ^{13}\text{C}$  HMBC  
(400 MHz, DMSO-d<sub>6</sub>)

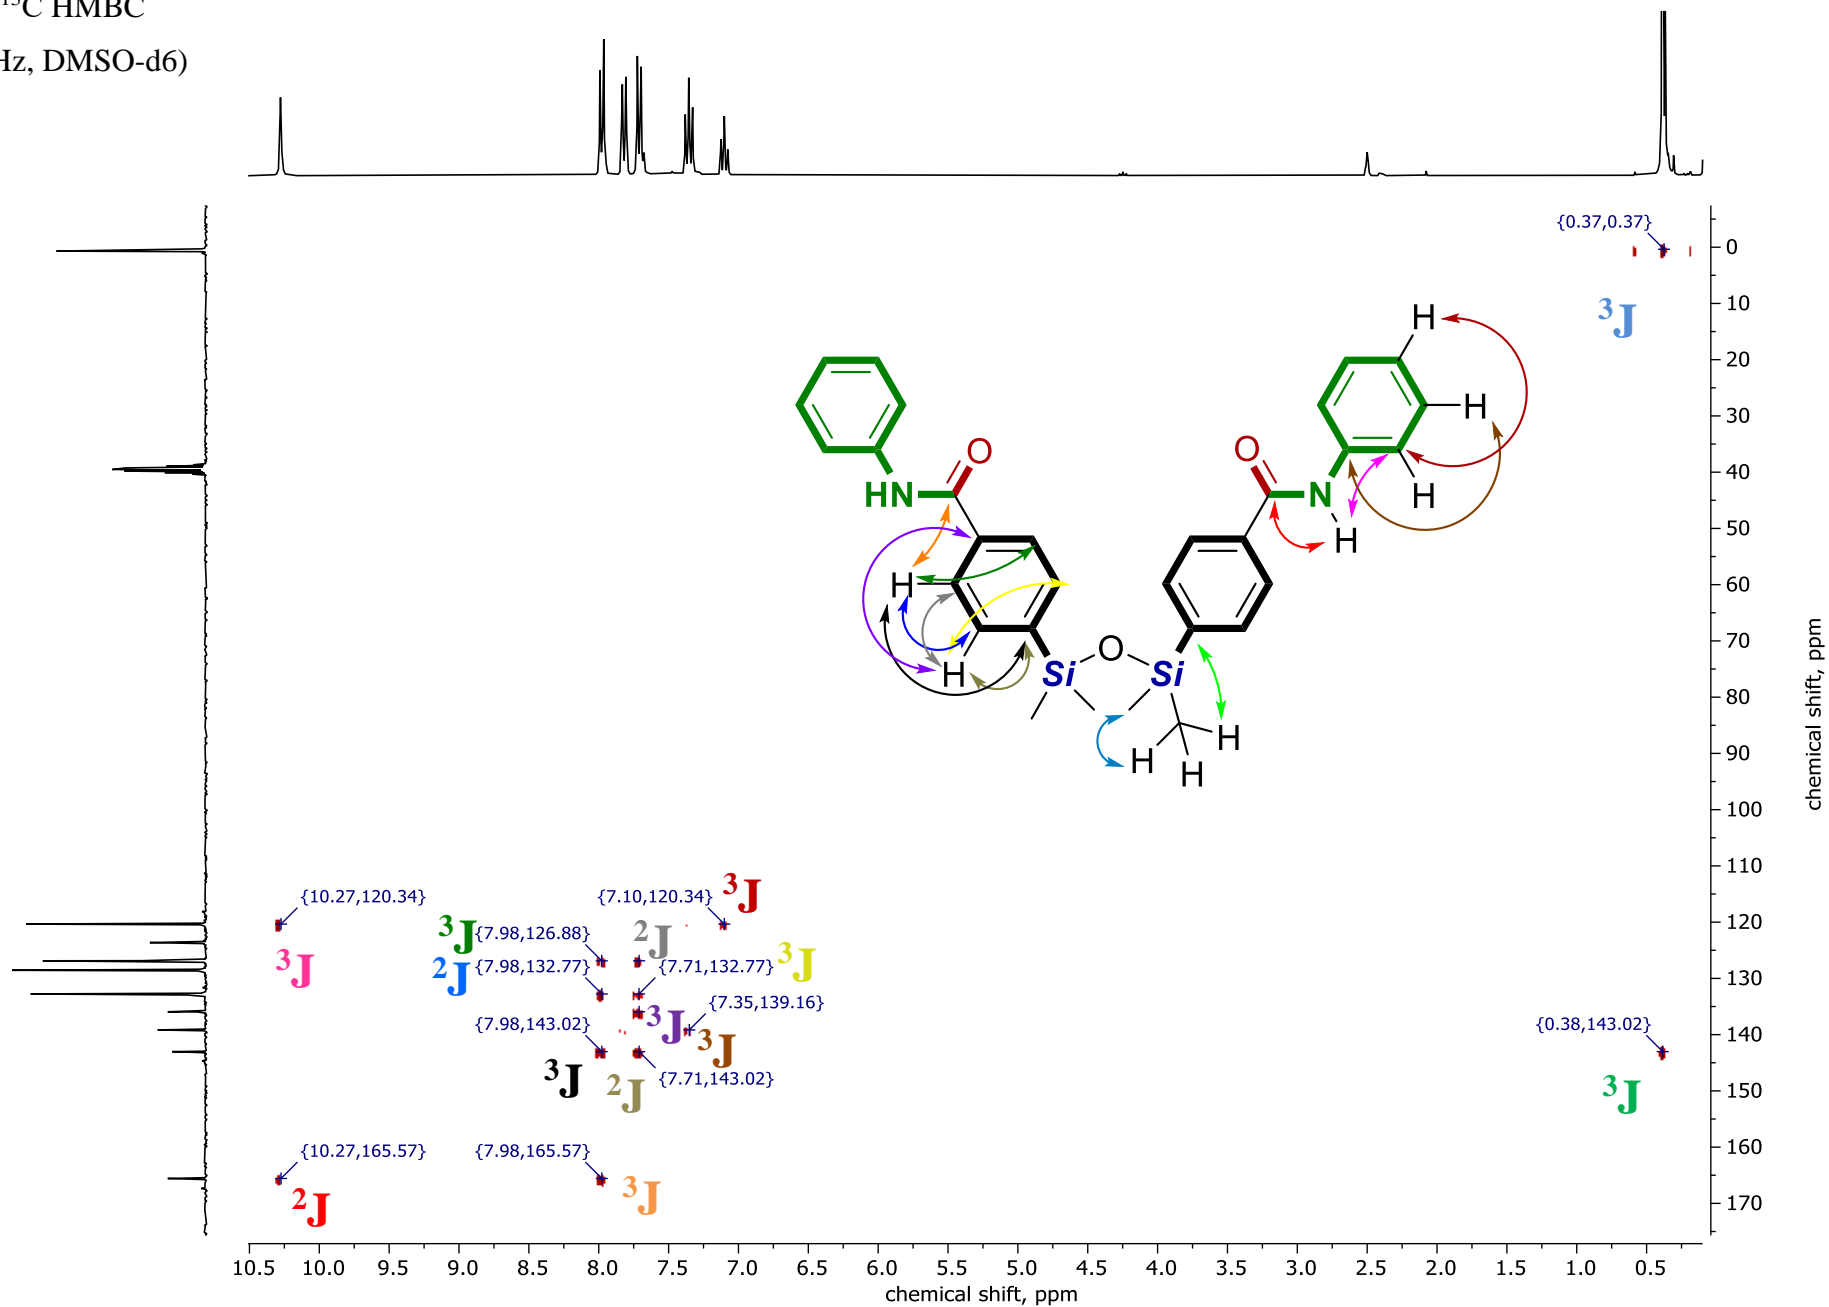

$^1\text{H} - ^{13}\text{C}$  HSQC  
(400 MHz, DMSO-d<sub>6</sub>)

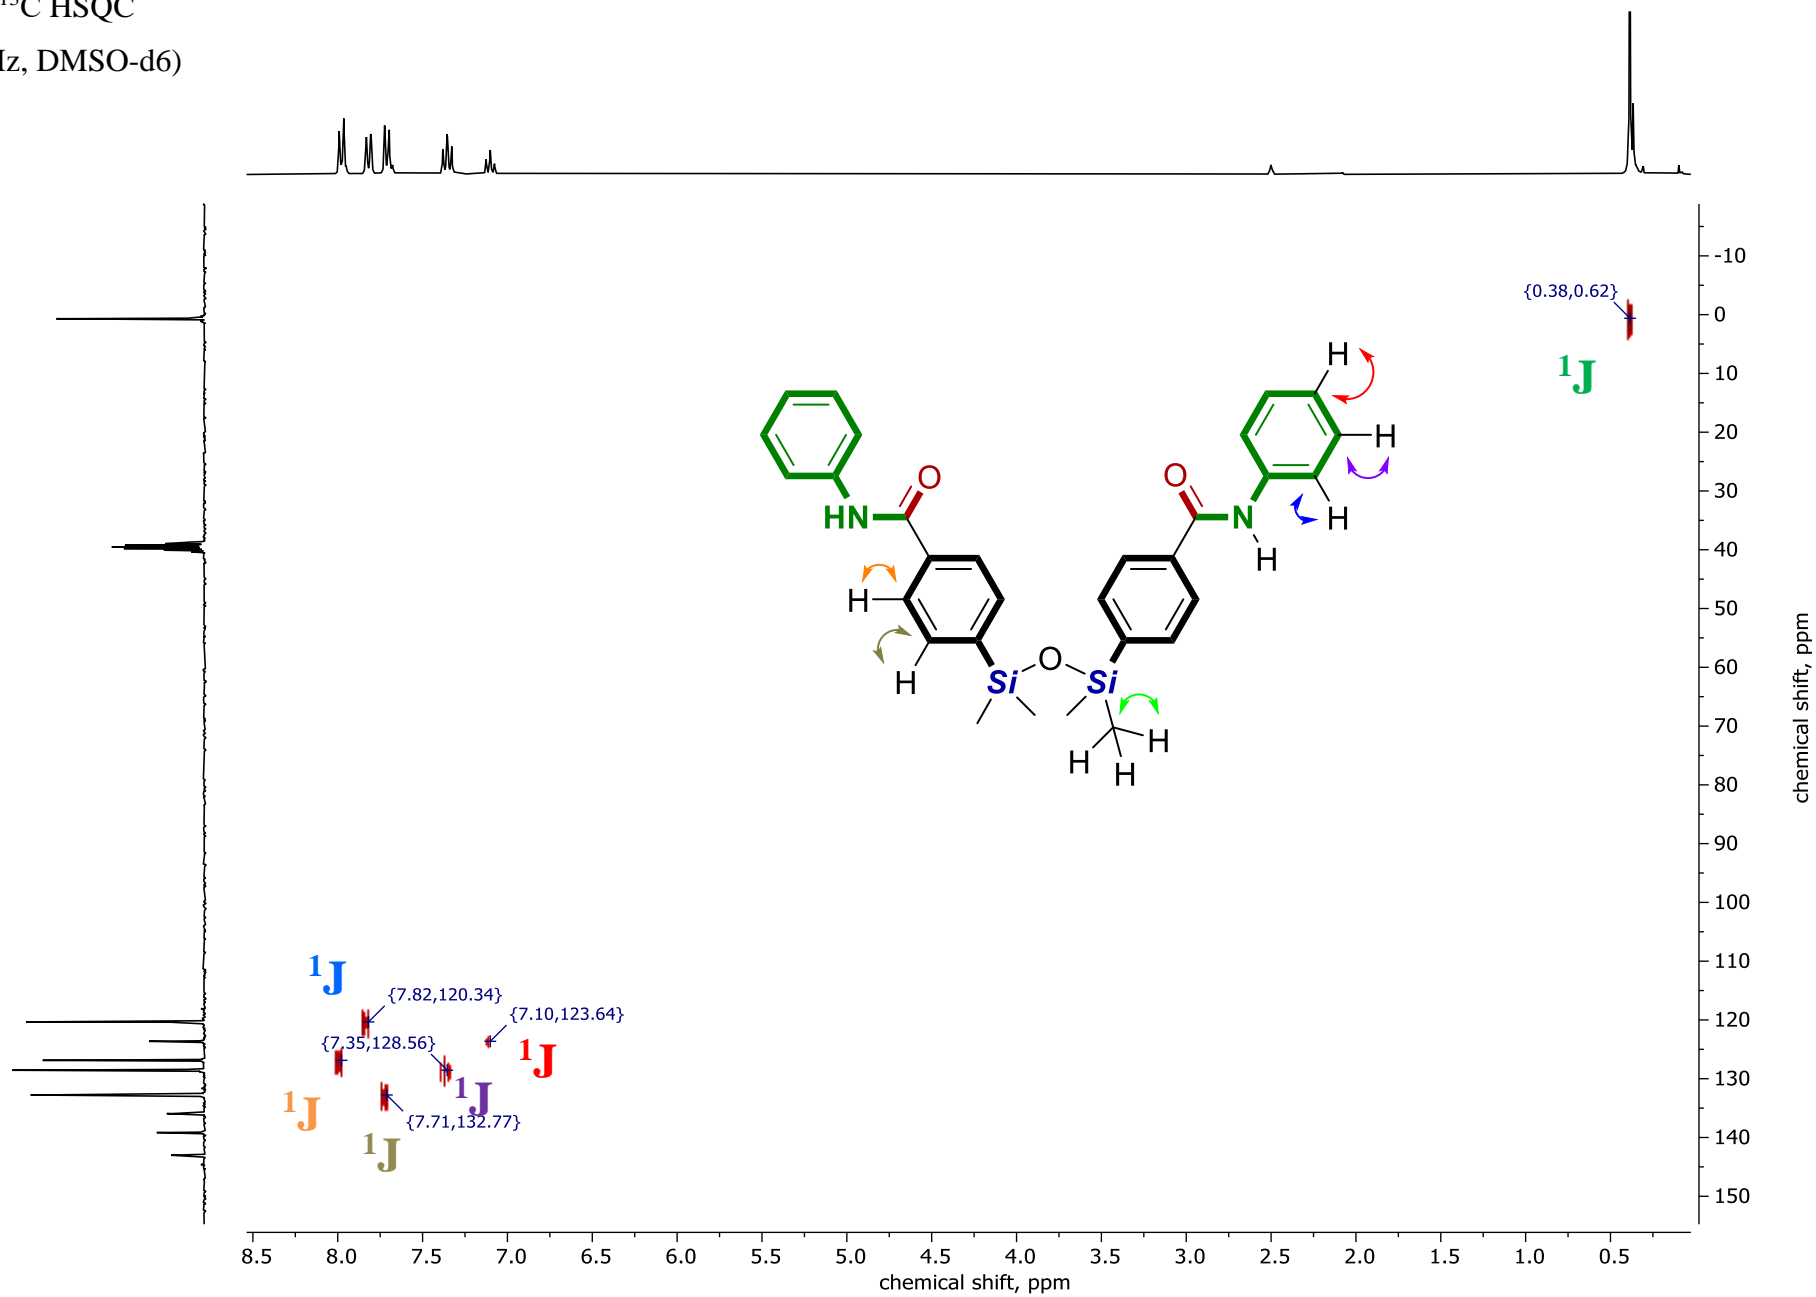

S93

$^1\text{H} - ^{29}\text{Si}$  HMBC  
(400 MHz, DMSO-d6)

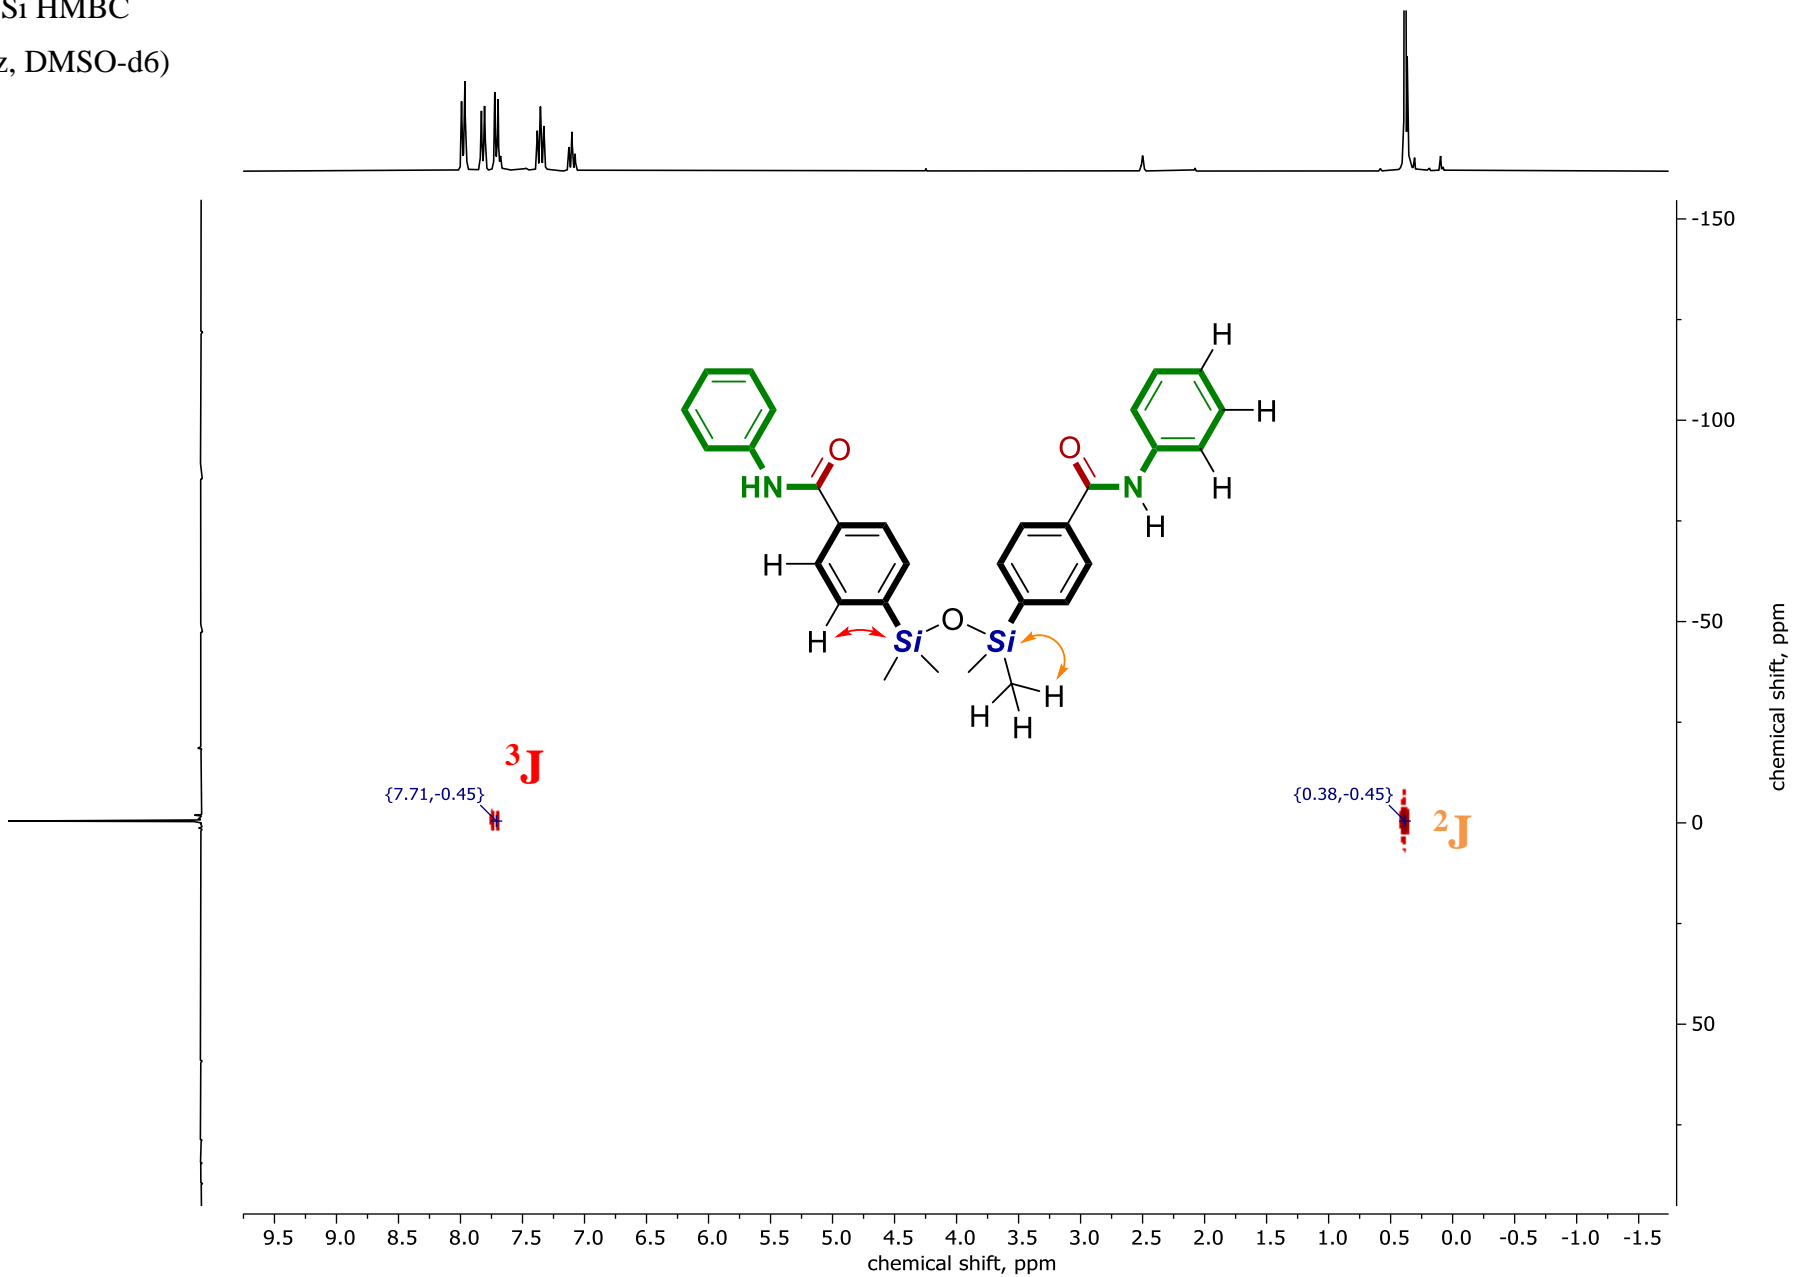

$^1\text{H} - ^{15}\text{N}$  HMBC  
(400 MHz, DMSO-d6)

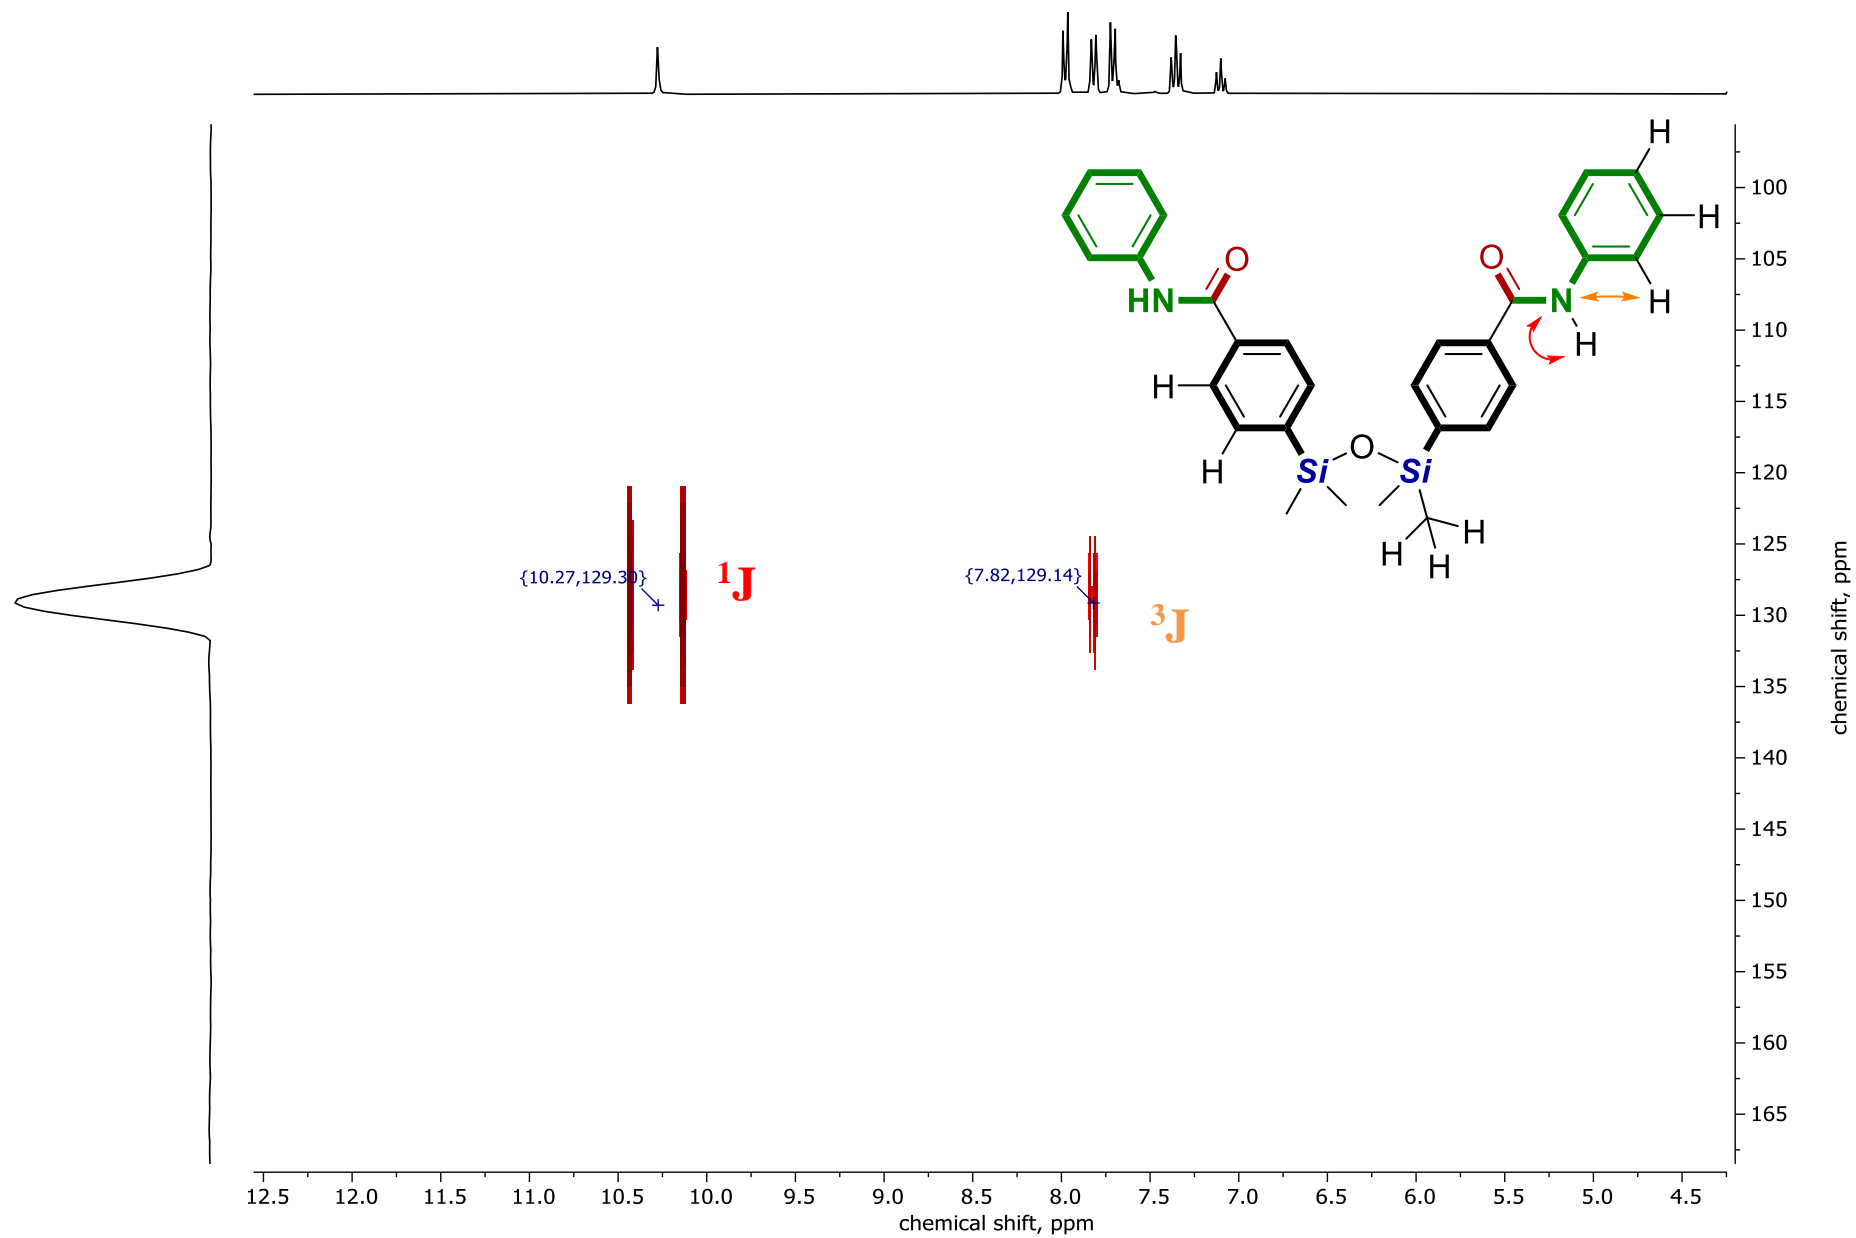

S95

$^1\text{H} - ^{15}\text{N}$  HSQC  
(400 MHz, DMSO-d6)

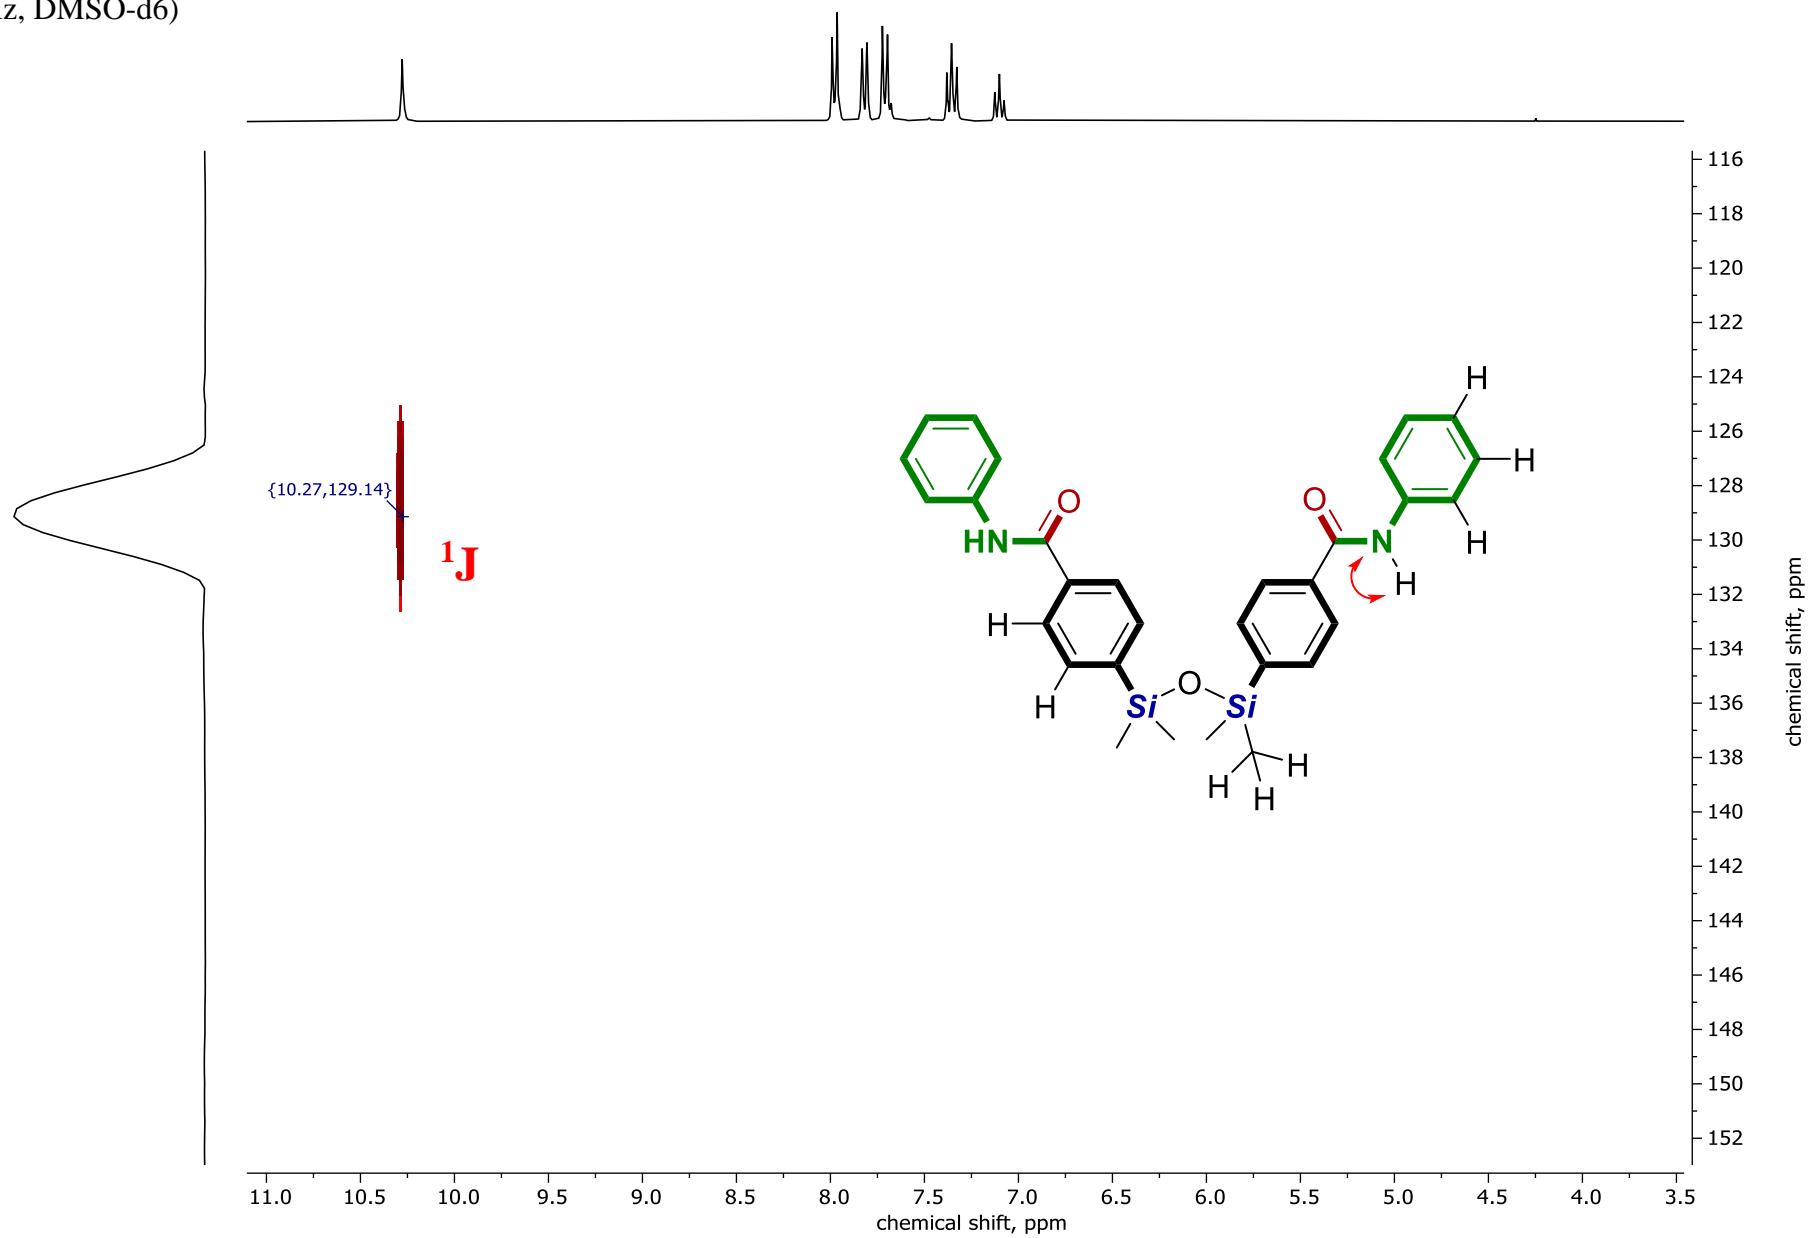

S96

IR-spectrum

— 3268

— 2958

∩ 1648

∩ 1599

∩ 1542

∩ 1443

— 1329

— 1258

— 1050

∩ 832

— 796

∩ 758

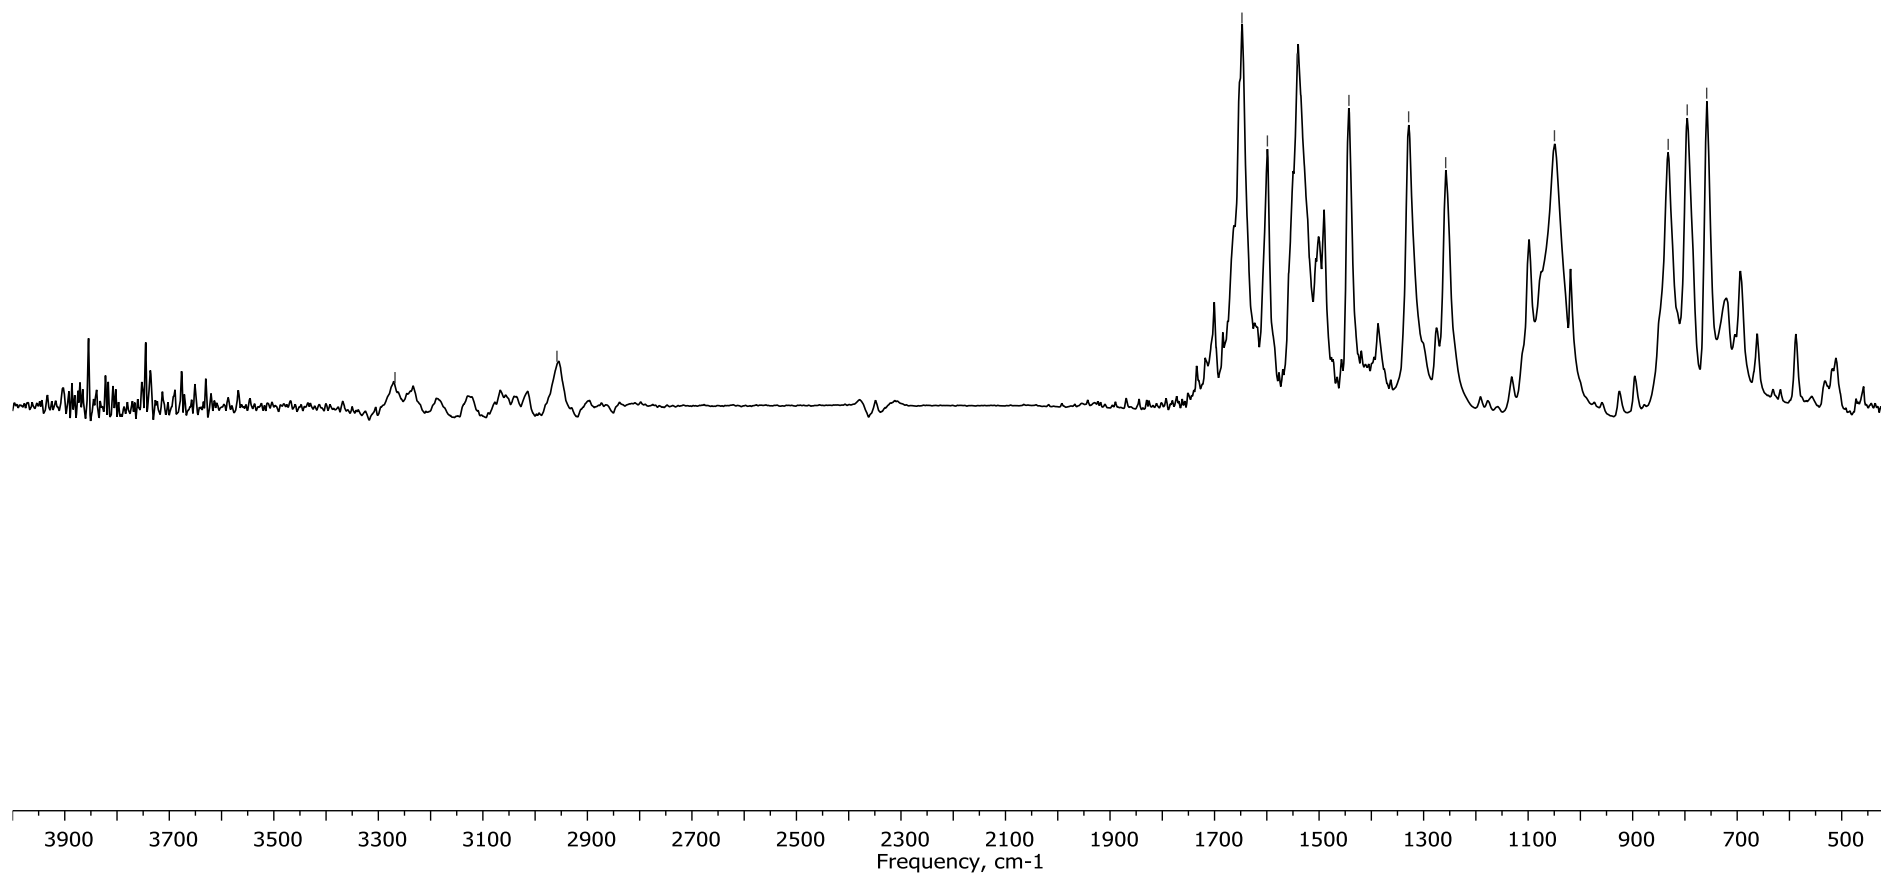



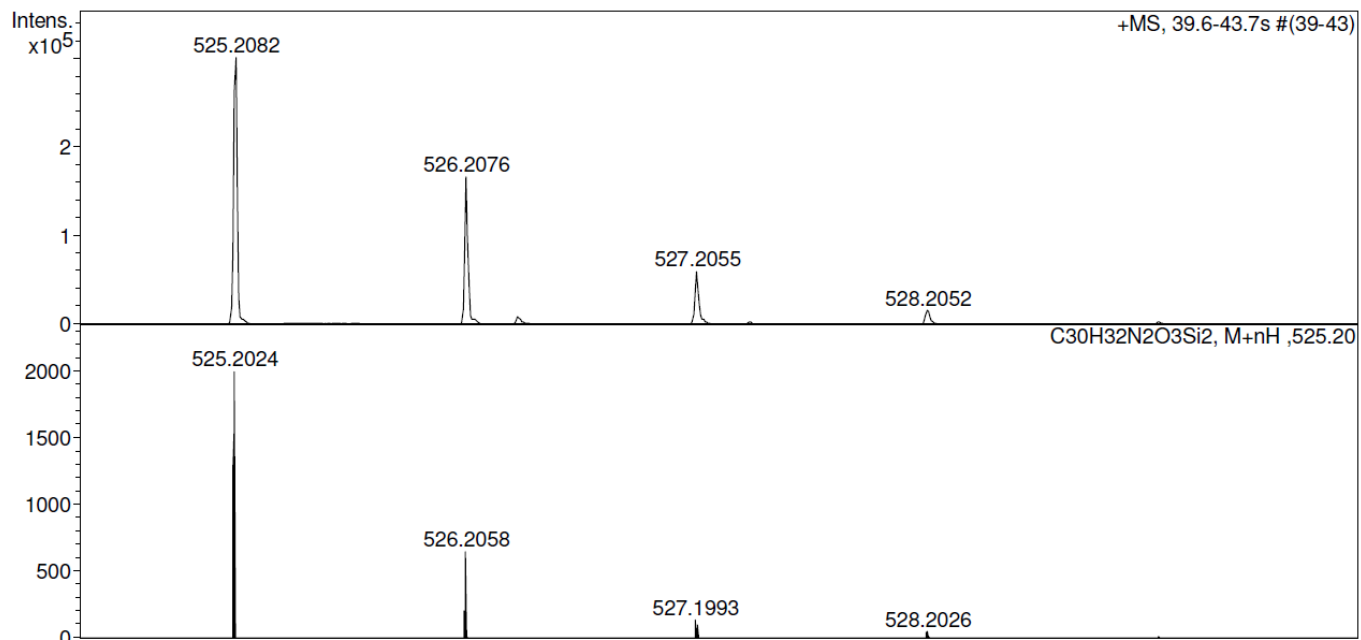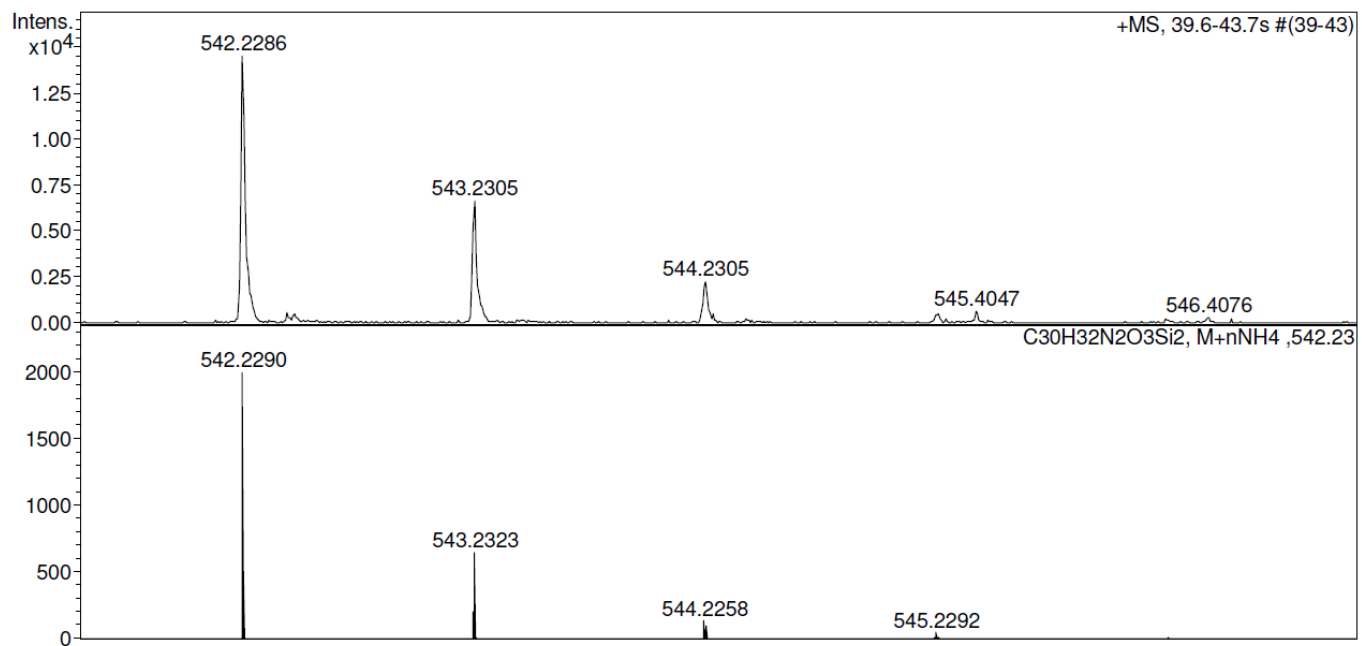

S98

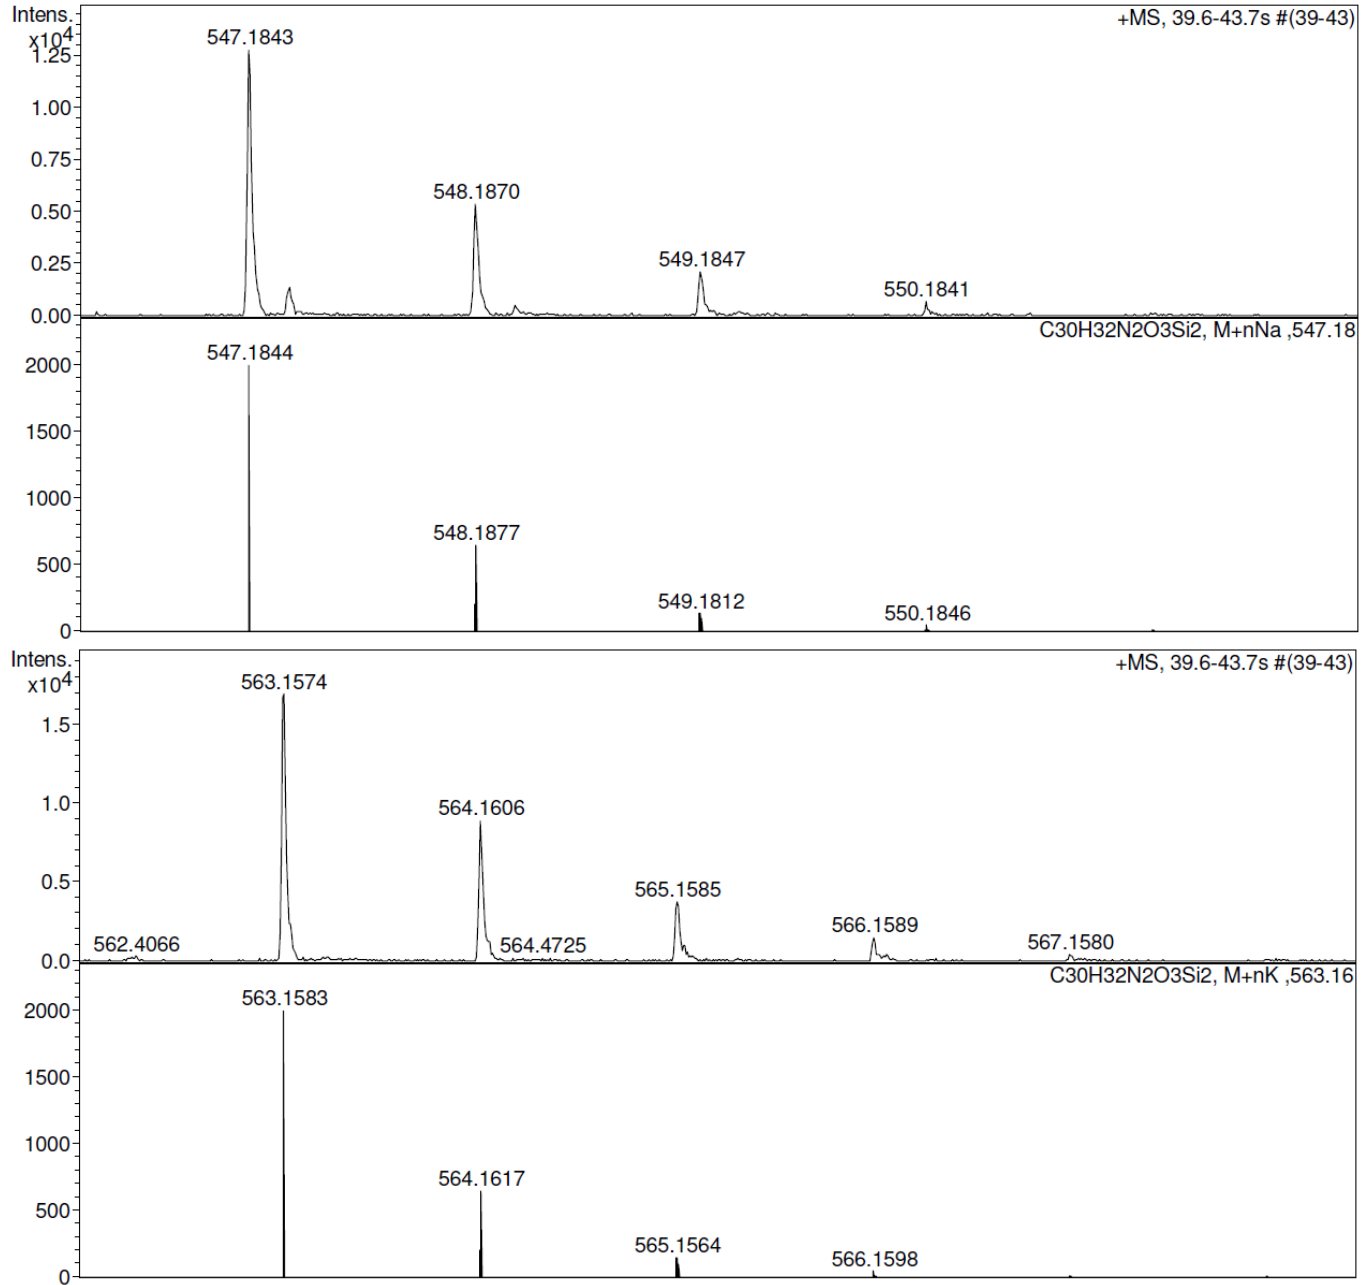

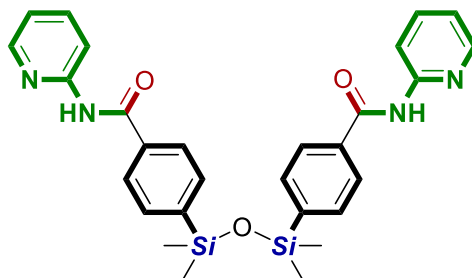

**Characterisation data for 4,4'-(1,1,3,3-tetramethyldisiloxane-1,3-diyl)bis(N-(pyridin-2-yl)benzamide):**

$^1\text{H}$  NMR (400 MHz, DMSO- $d_6$ ):  $\delta = 10.76$  (s, 2H),  $\delta = 8.39$ - $8.37$  (m, 2H),  $\delta = 8.21$  (m, 2H),  $\delta = 8.03$  (d,  $^3J = 11$  Hz, 4H),  $\delta = 7.86$ - $7.80$  (m, 2H),  $\delta = 7.68$  (d,  $^3J = 11$  Hz, 4H),  $\delta = 7.18$ - $7.13$  (m, 2H),  $\delta = 0.37$  (s, 12H).  $^{13}\text{C}$  NMR (100 MHz, DMSO- $d_6$ ):  $\delta = 165.97$ , 152.14, 147.90, 143.46, 138.06, 134.99, 132.76, 127.15, 119.79, 114.70, 0.67.  $^{29}\text{Si}$  NMR (80 MHz, DMSO- $d_6$ ):  $\delta = -0.39$ .  $^{15}\text{N}$  NMR (40 MHz, DMSO- $d_6$ ):  $\delta = 288.93$ , 138.27. HRMS (ESI)  $m/z$   $[\text{M} + \text{H}]^+$ : calcd for  $[\text{C}_{28}\text{H}_{30}\text{N}_4\text{O}_3\text{Si}_2 + \text{H}]^+$ , 527.1929; found, 527.1964;  $[\text{M} + \text{K}]^+$ : calcd for  $[\text{C}_{28}\text{H}_{30}\text{N}_4\text{O}_3\text{Si}_2 + \text{K}]^+$ , 565.1488; found, 565.1482;  $[\text{M} + \text{Na}]^+$ : calcd for  $[\text{C}_{28}\text{H}_{30}\text{N}_4\text{O}_3\text{Si}_2 + \text{Na}]^+$ , 549.1749; found, 549.1746. IR ( $\text{cm}^{-1}$ ): 2957, 1676, 1582, 1539, 1437, 1306, 1254, 1074, 831, 794.

<sup>1</sup>H NMR

(400 MHz, DMSO-d6)

S100

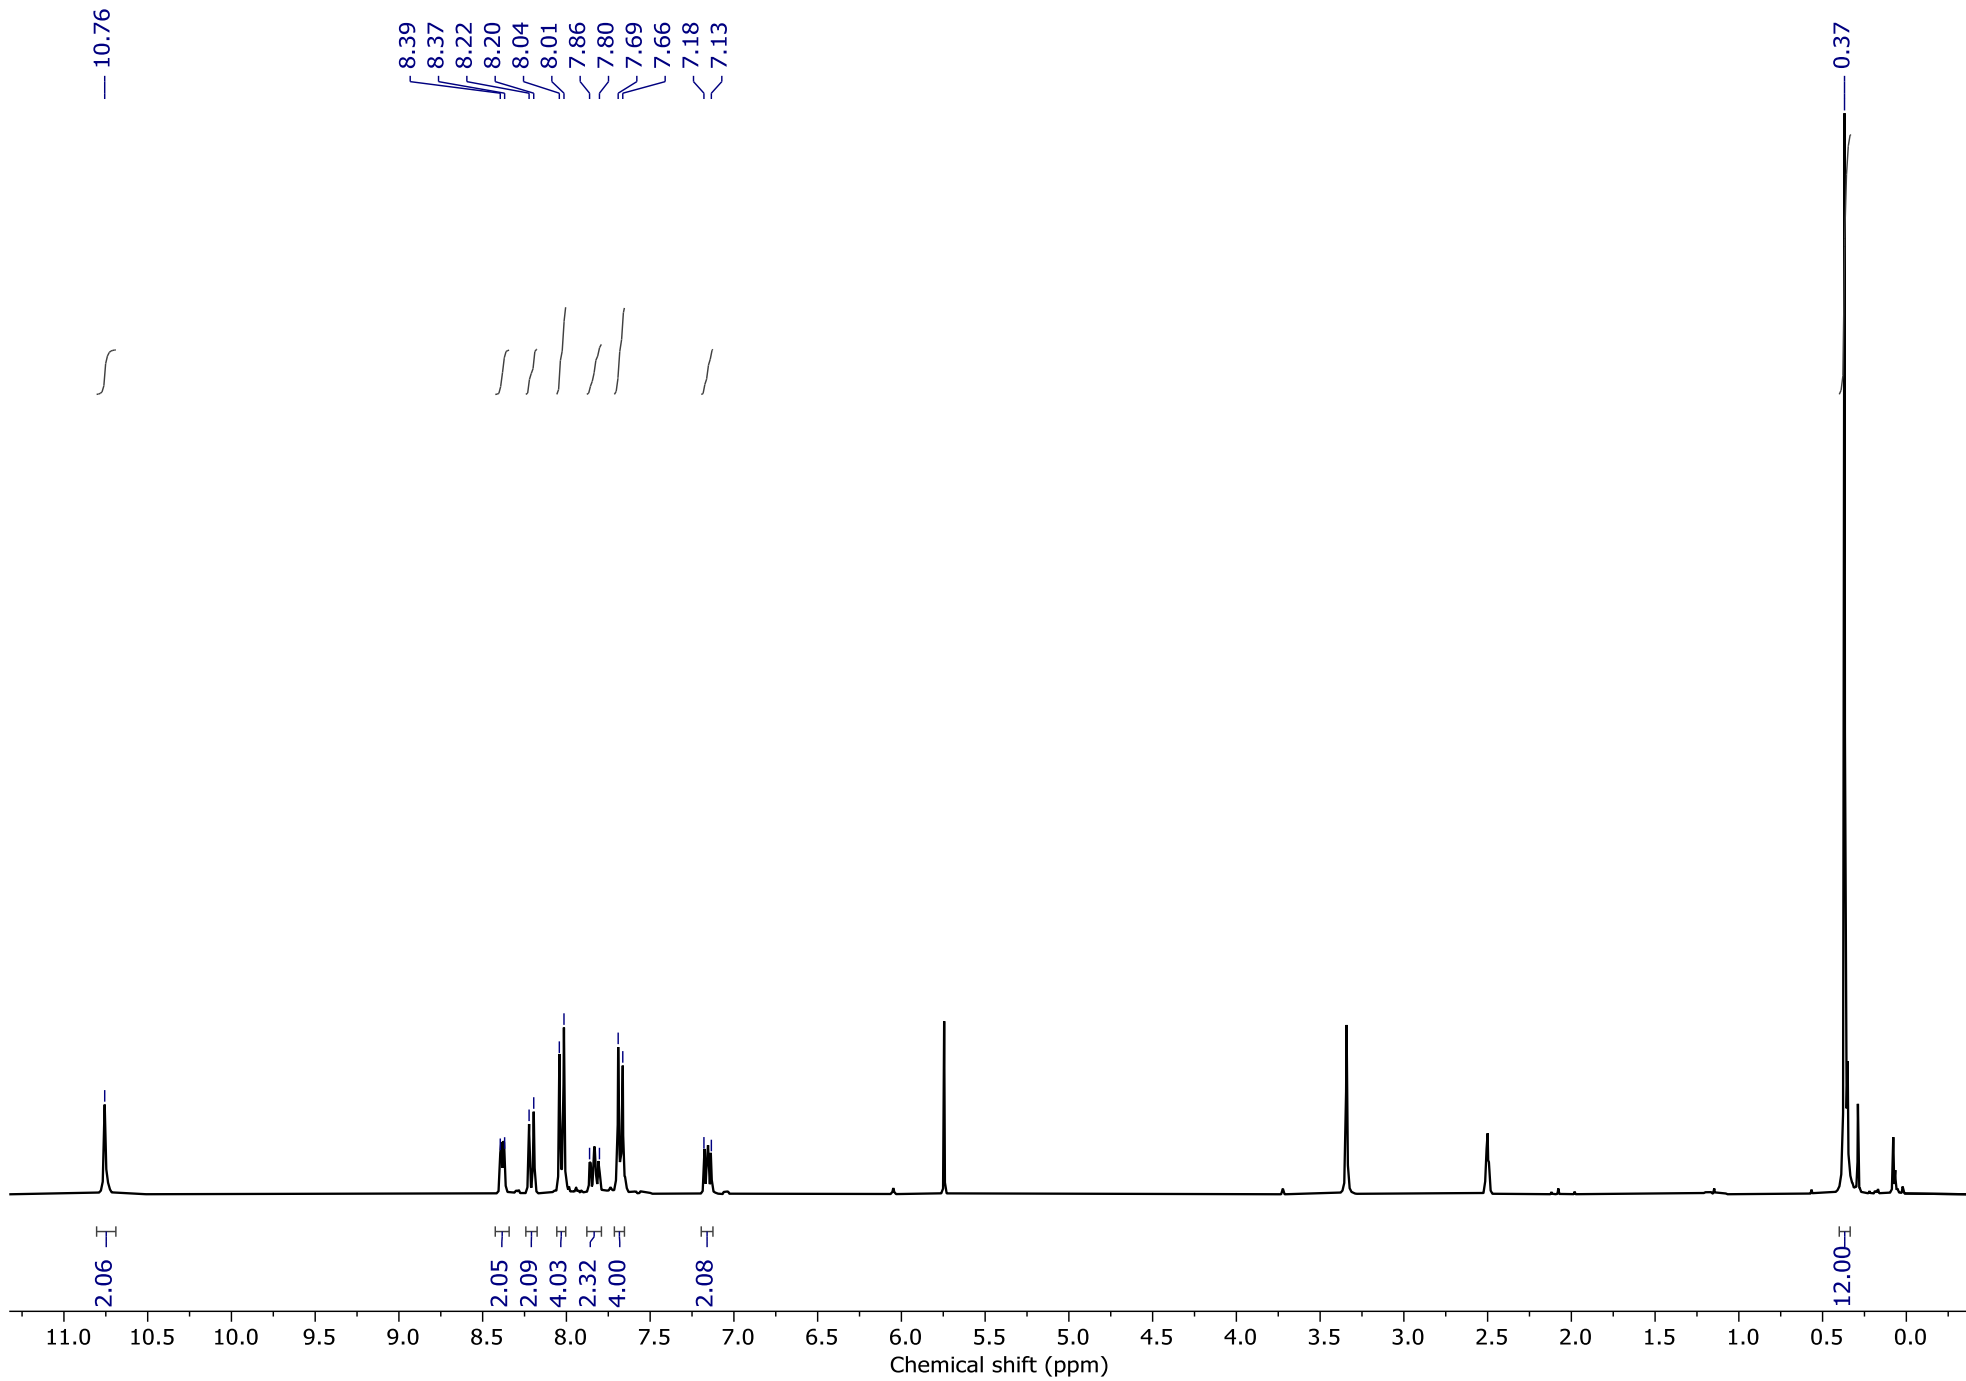

$^{13}\text{C}$  NMR

(100 MHz, DMSO-d6)

S101

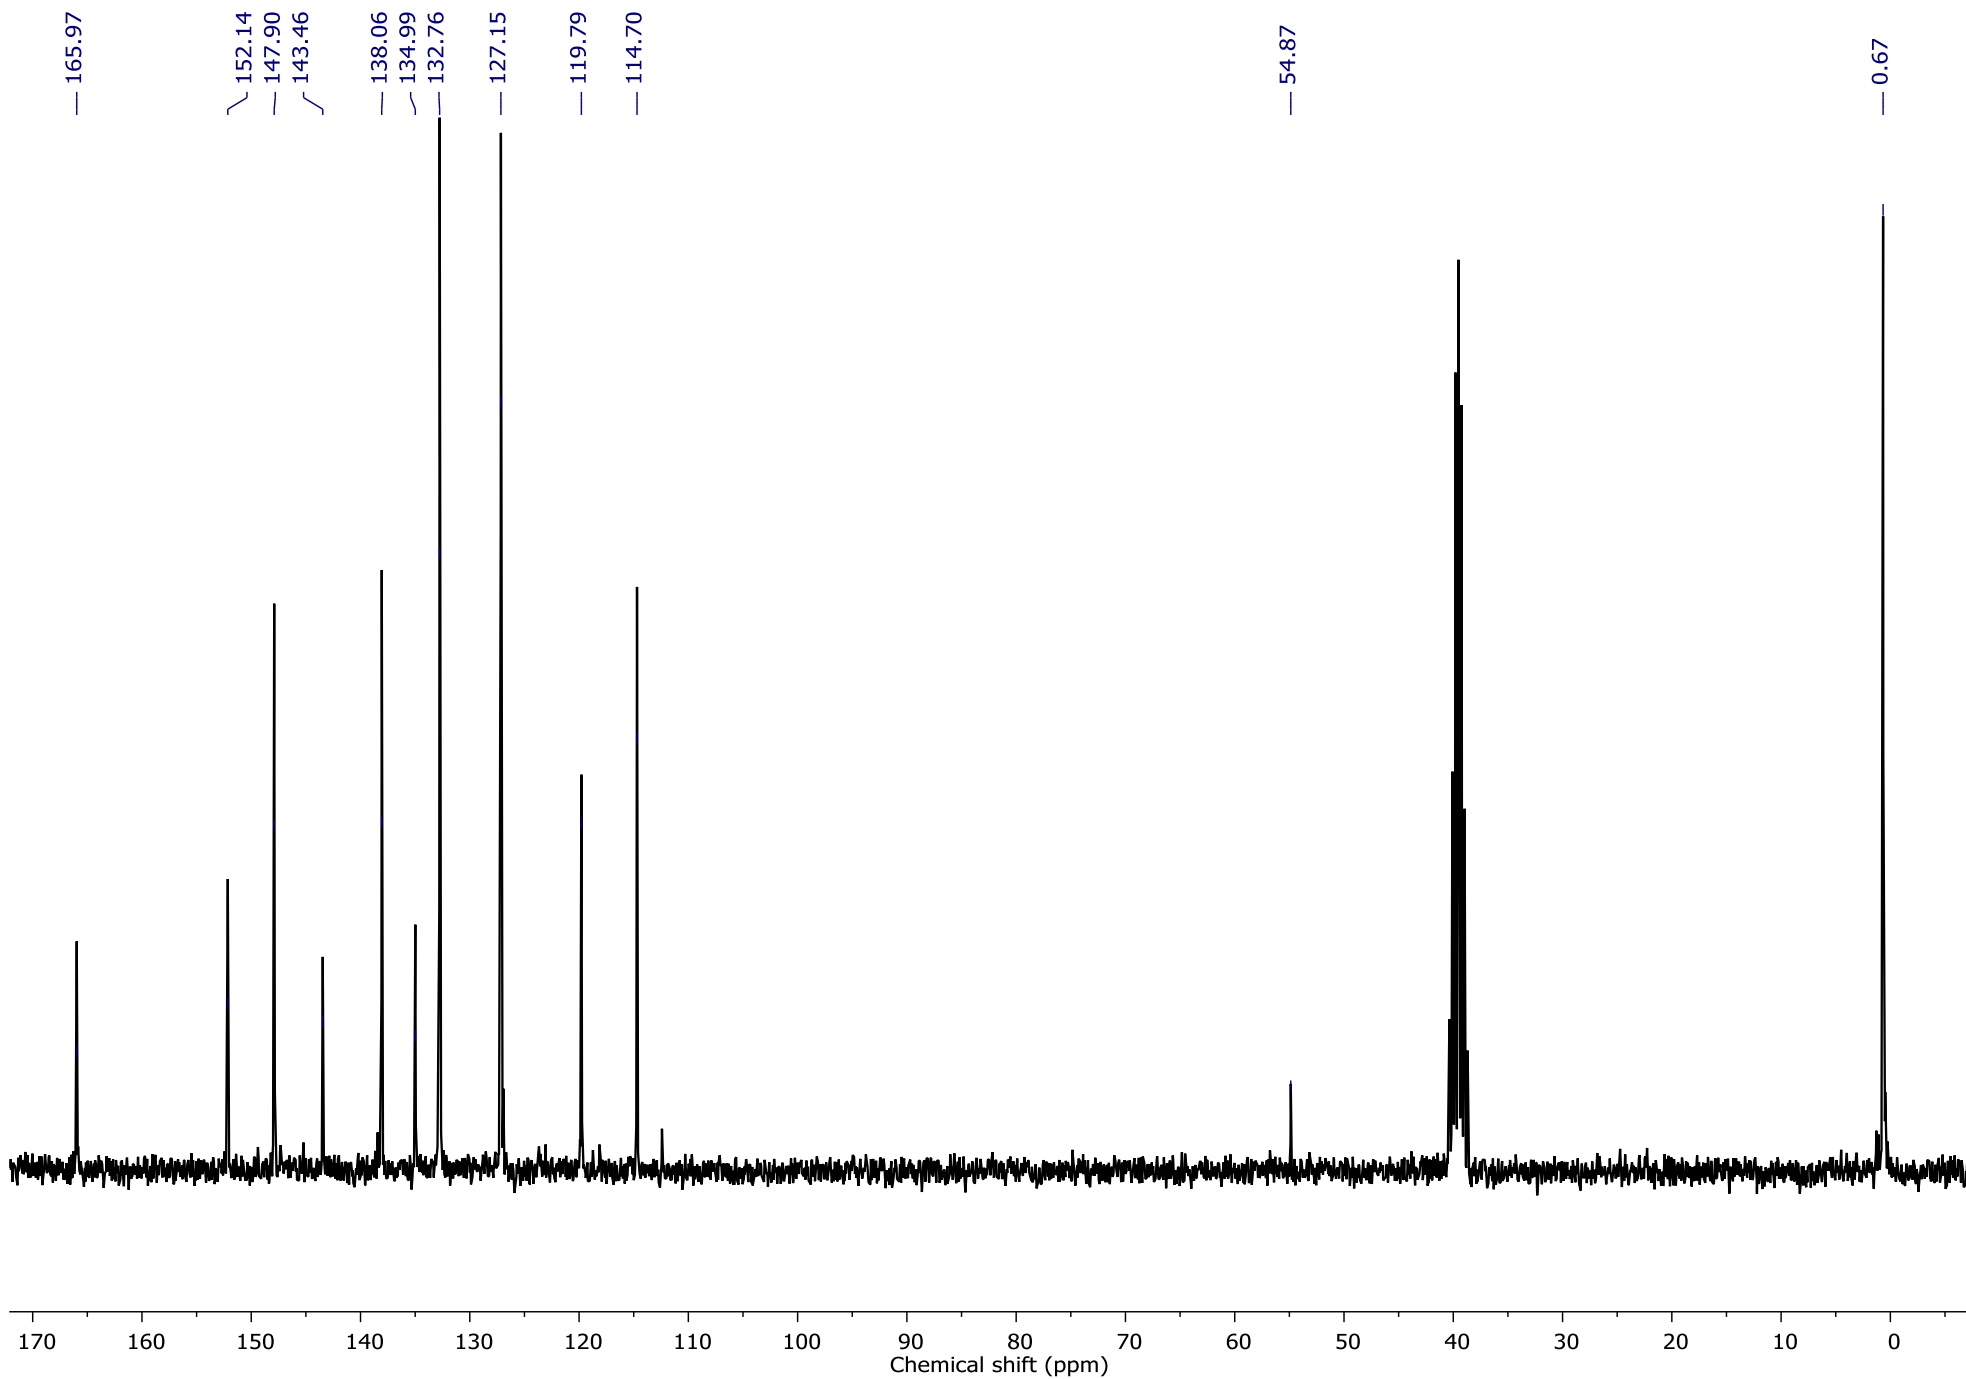

$^{29}\text{Si}$  NMR  
(80 MHz, DMSO-d6)

S102

-0.39

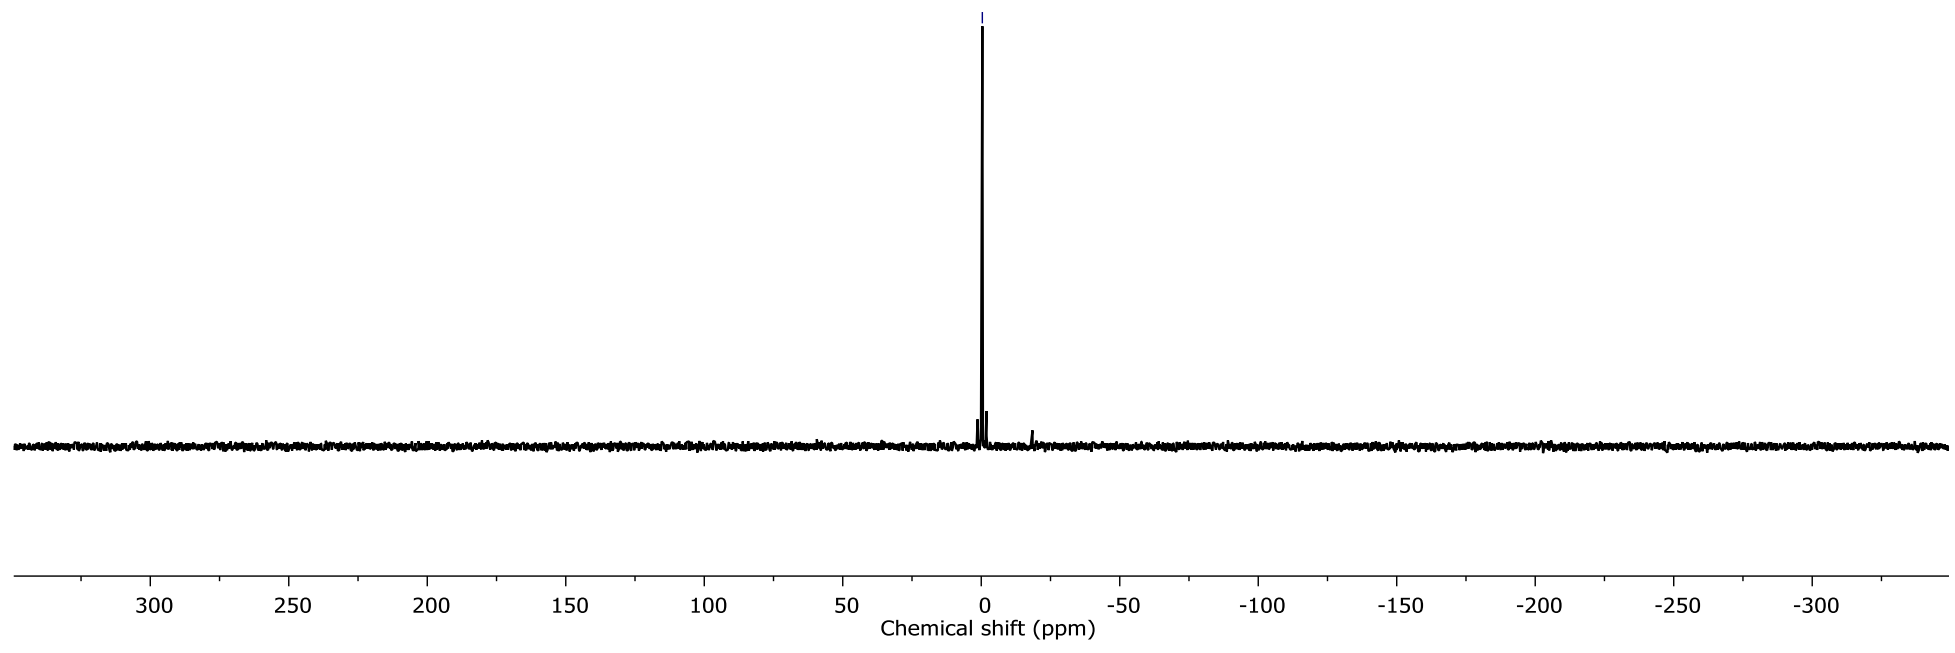

$^{15}\text{N}$  NMR  
(reconstructed, 40 MHz,  
DMSO-d6)

S103

— 288.93

— 138.27

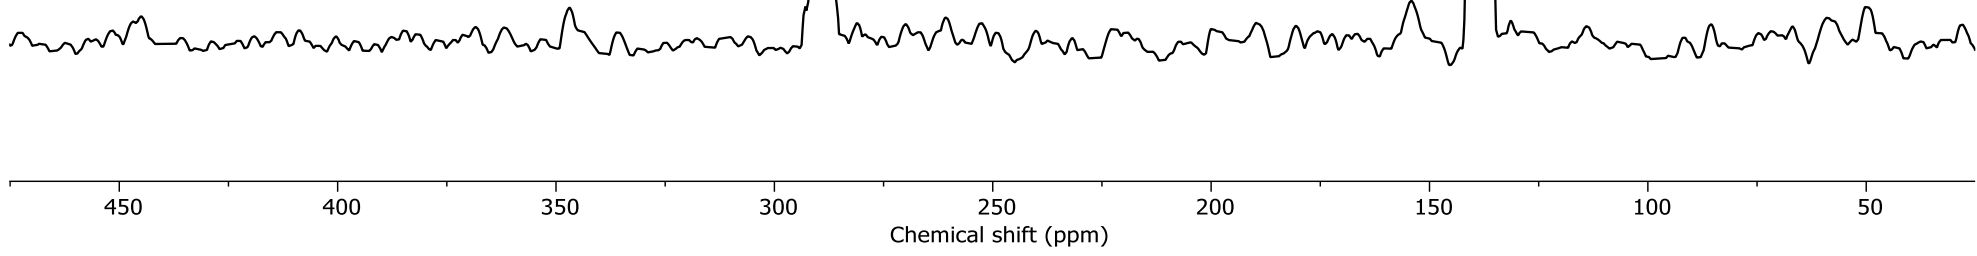

S104

$^1\text{H} - ^{13}\text{C}$  HSQC  
(400 MHz, DMSO-d6)

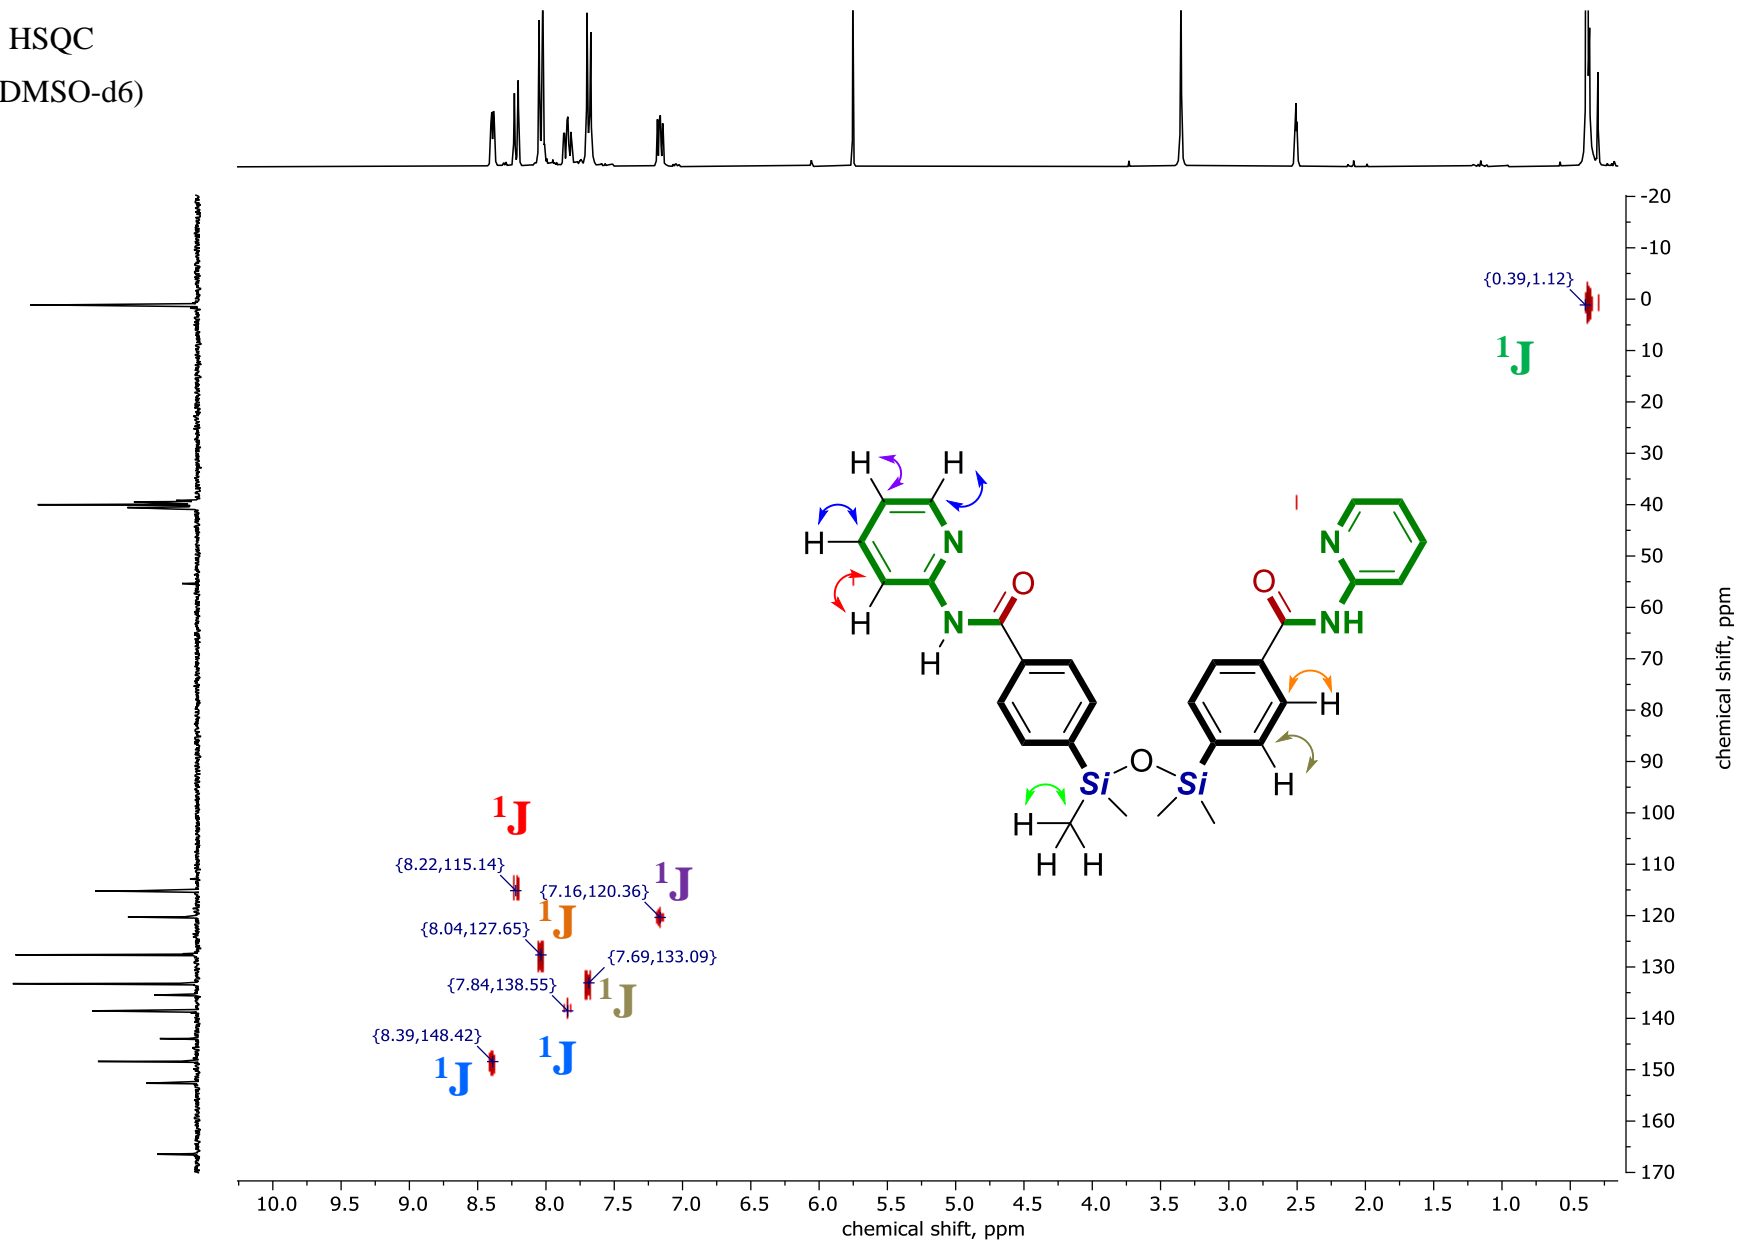



S105

$^1\text{H} - ^{13}\text{C}$  HMBC  
(400 MHz, DMSO-d6)

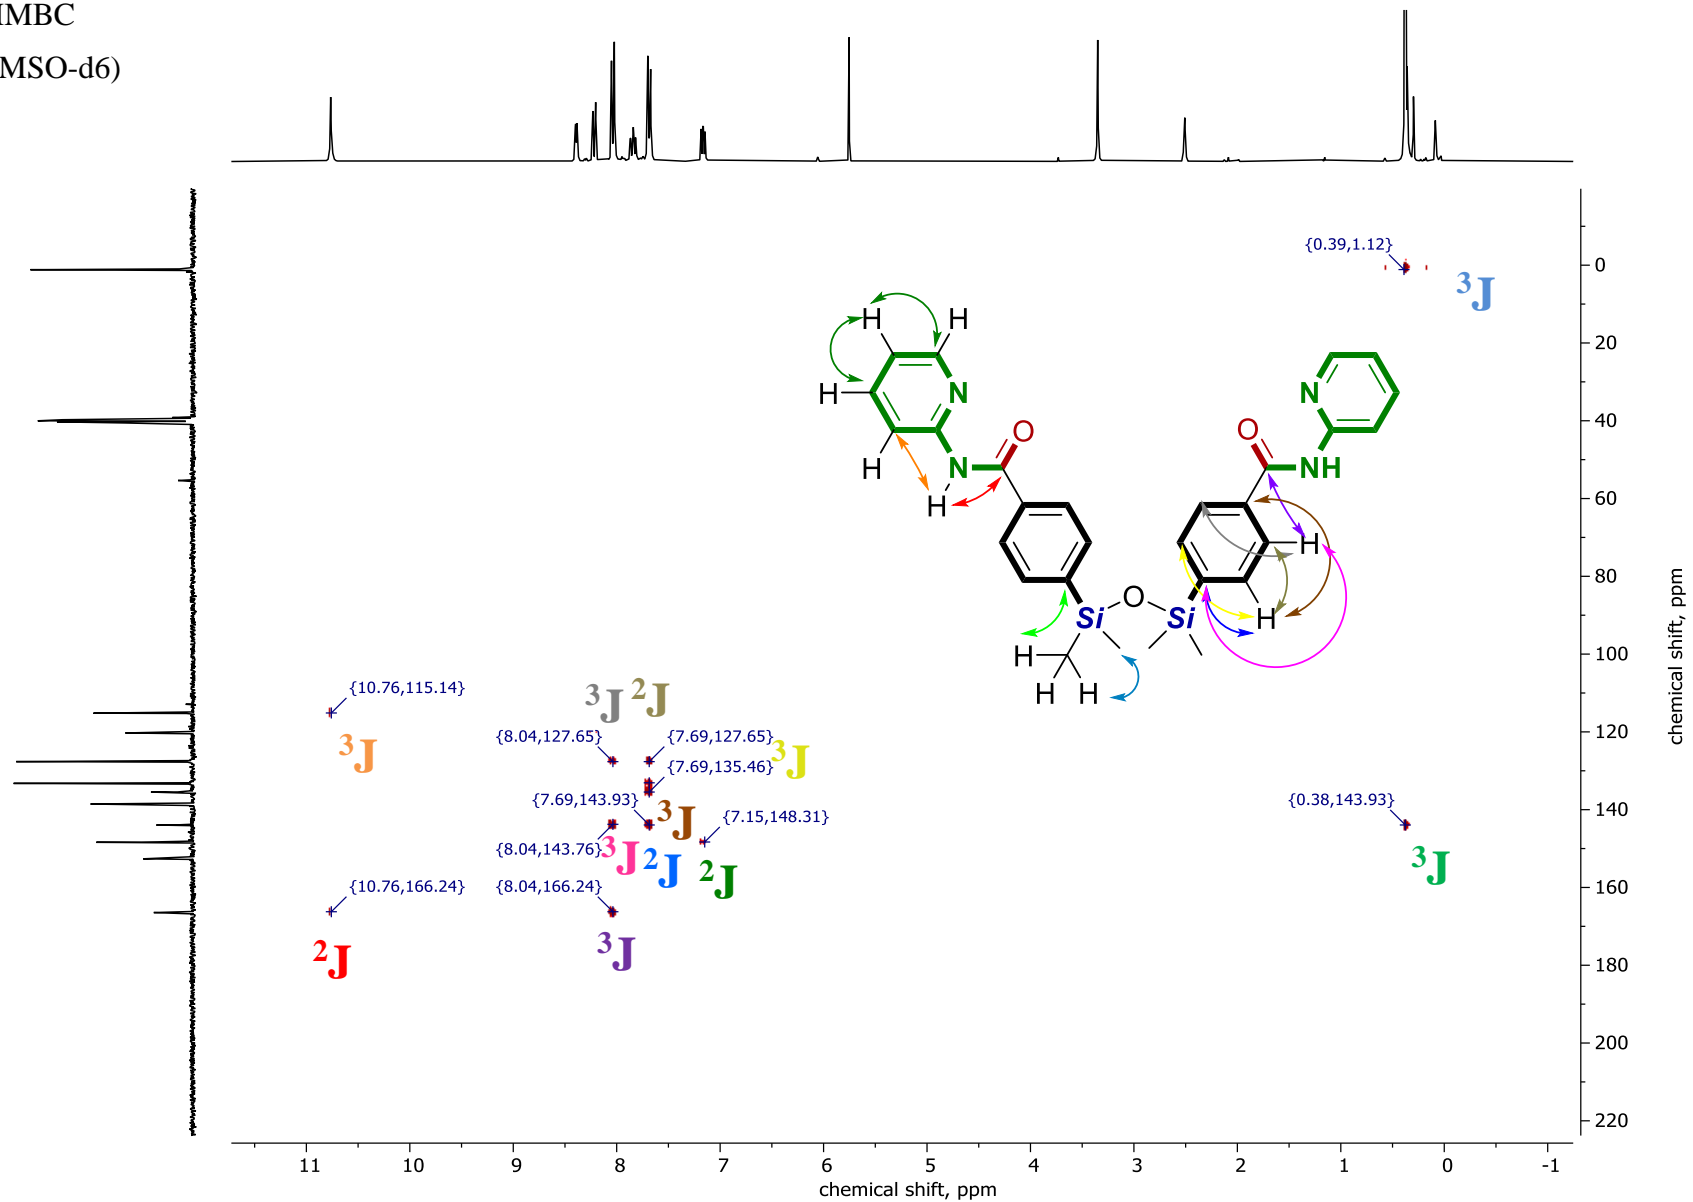

S106

$^1\text{H} - ^{29}\text{Si}$  HMBC  
(400 MHz, DMSO-d6)

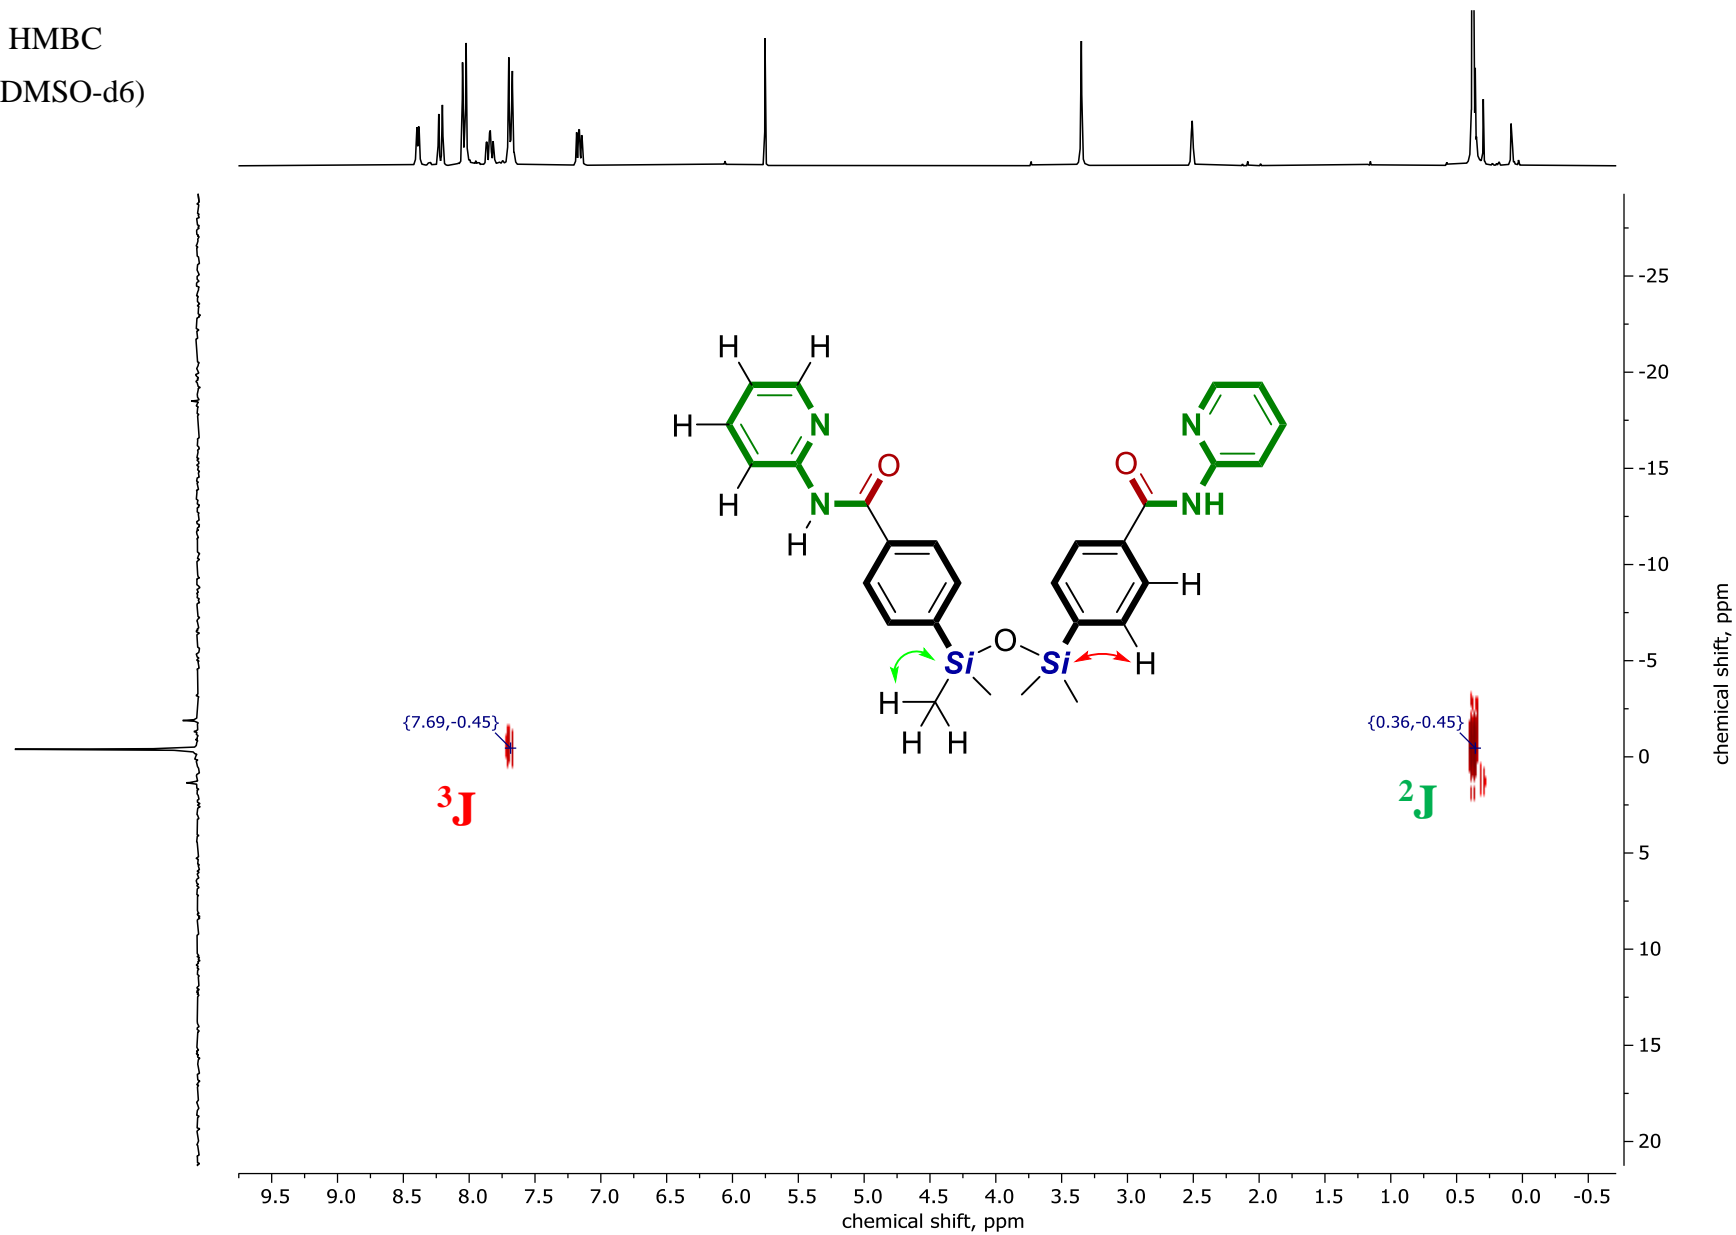

$^1\text{H} - ^{15}\text{N}$  HMBC  
(400 MHz, DMSO-d<sub>6</sub>)

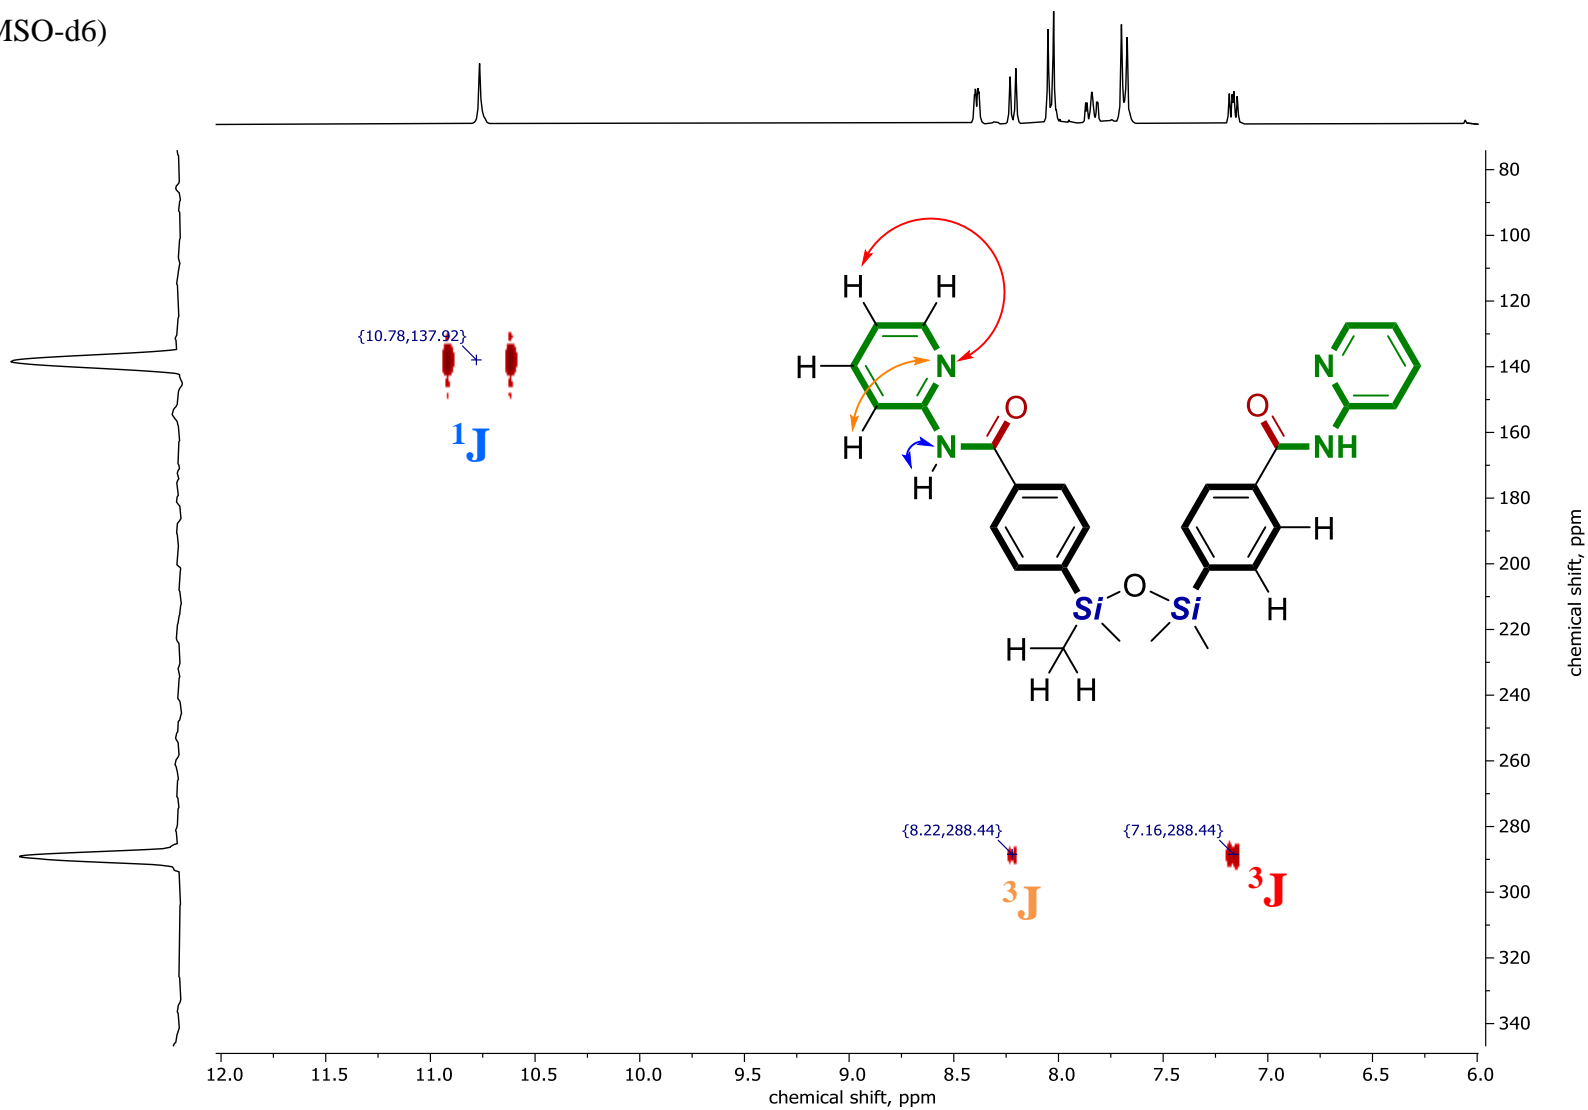

S108

$^1\text{H} - ^{15}\text{N}$  HSQC  
(400 MHz, DMSO-d6)

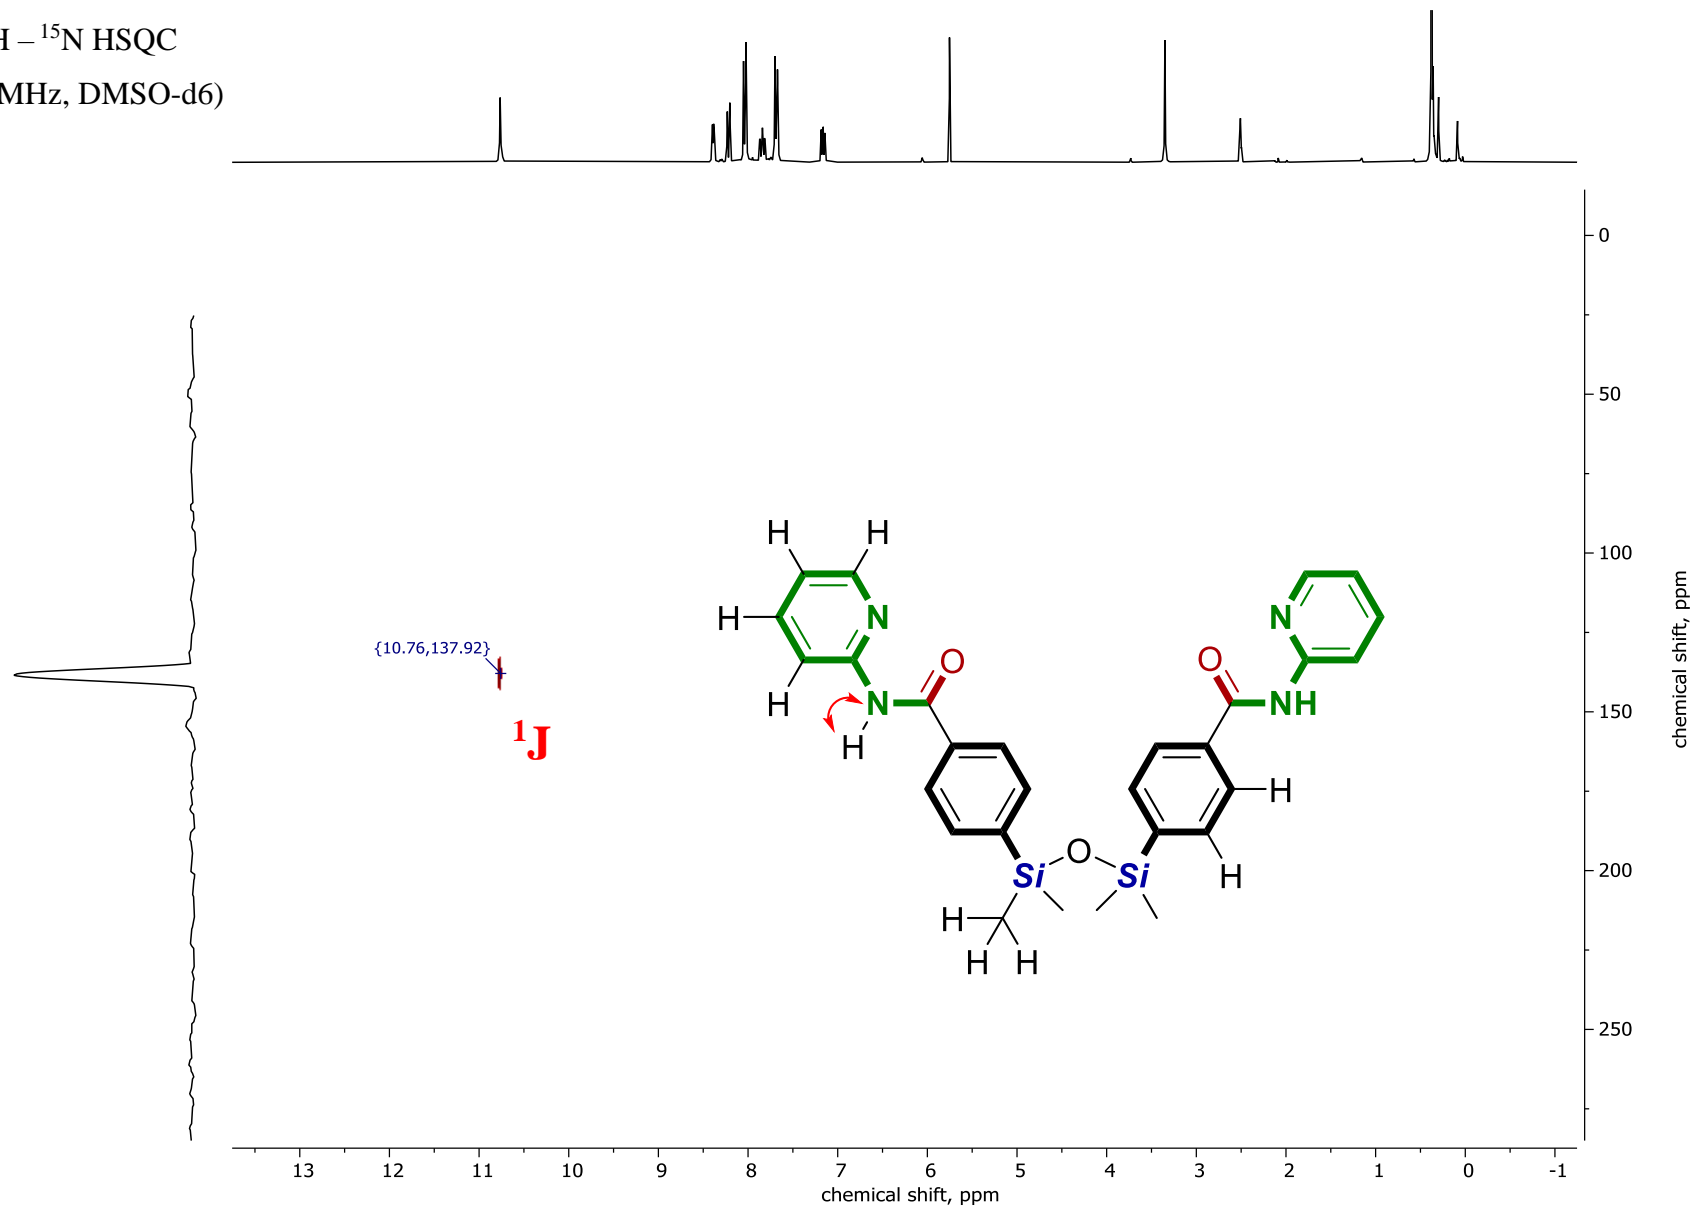

IR-spectrum

S109

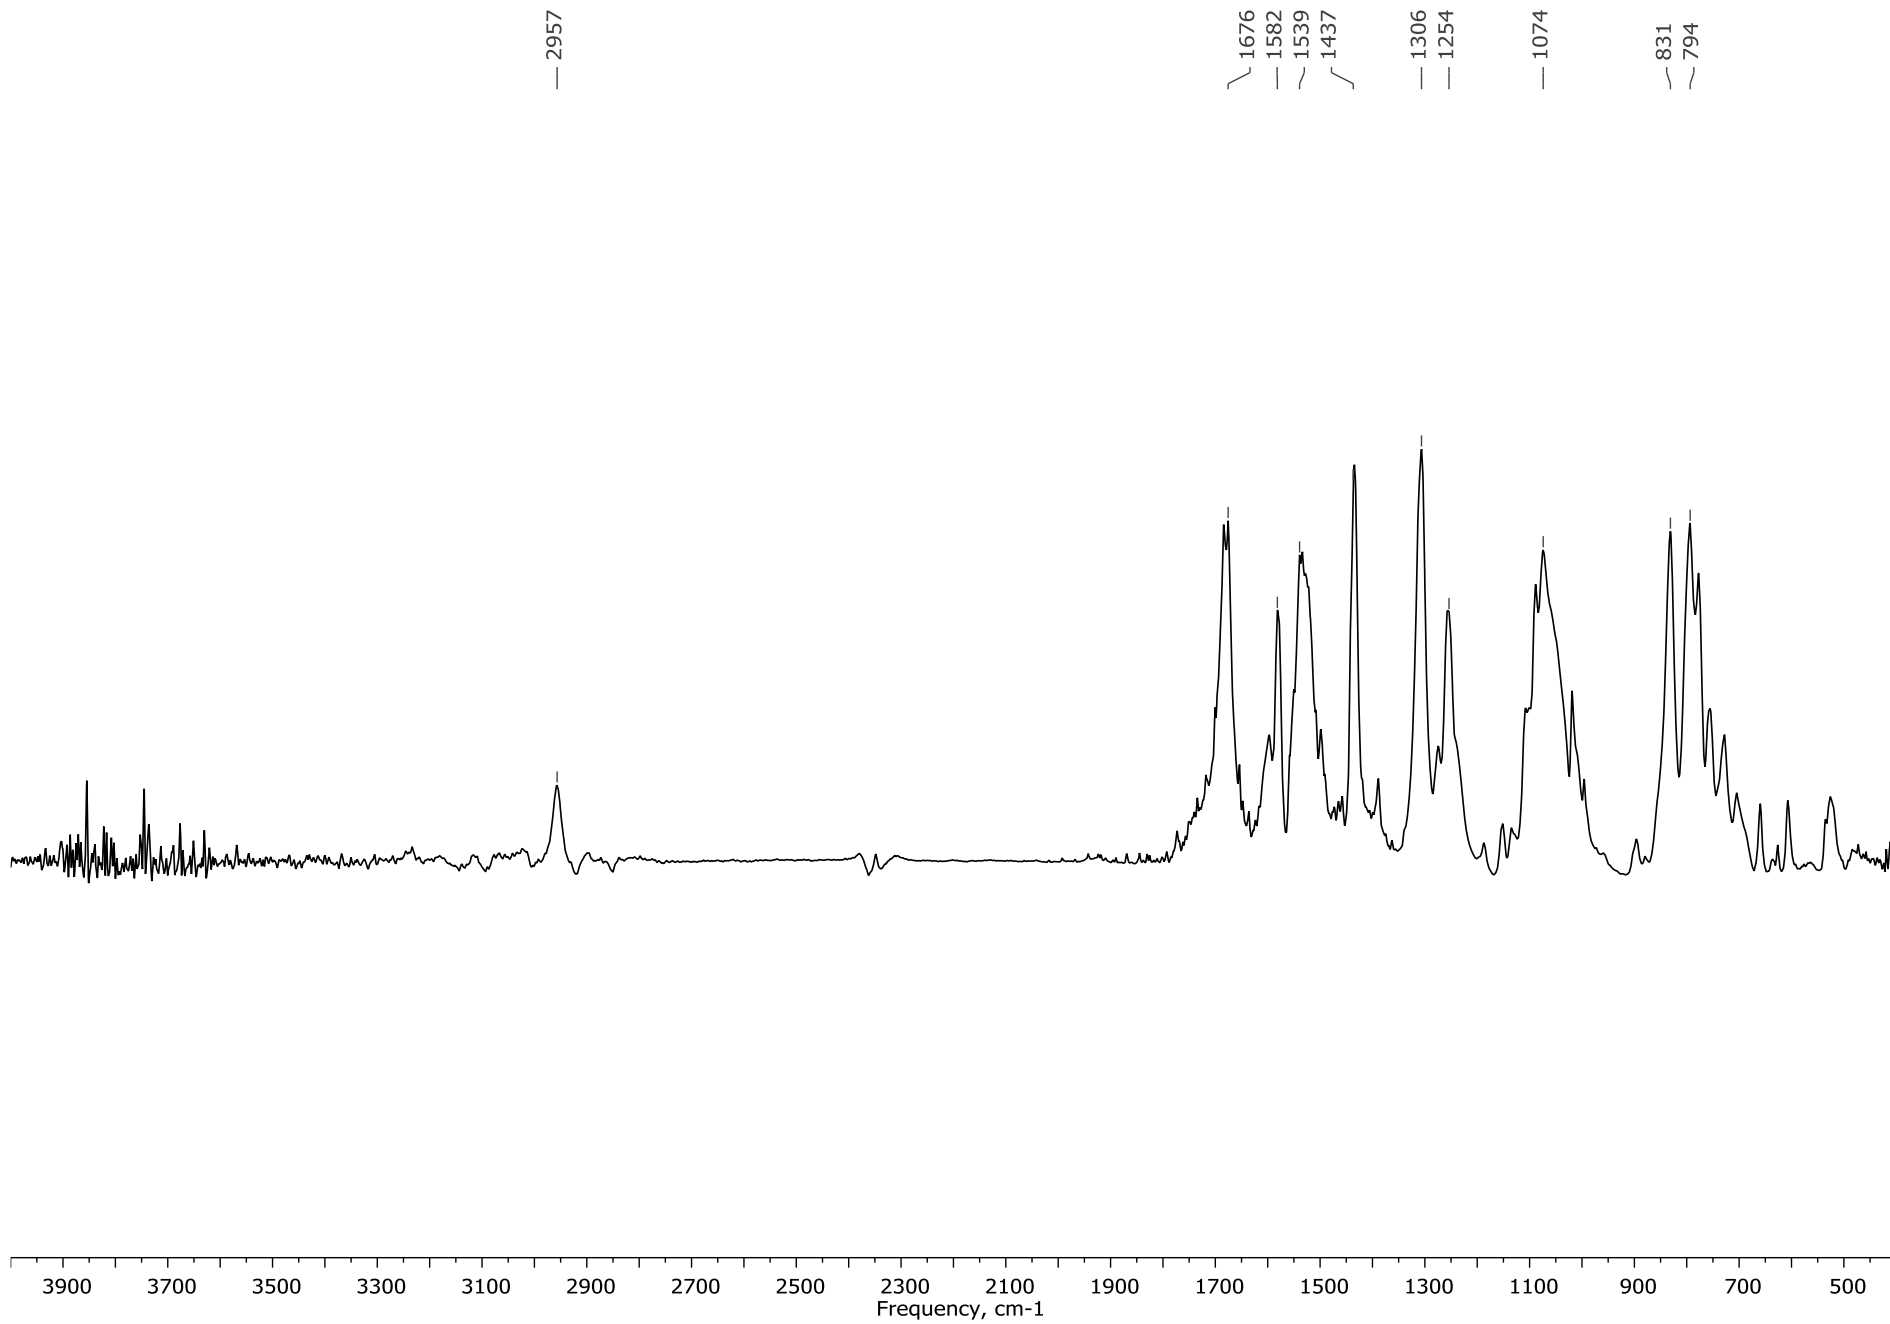

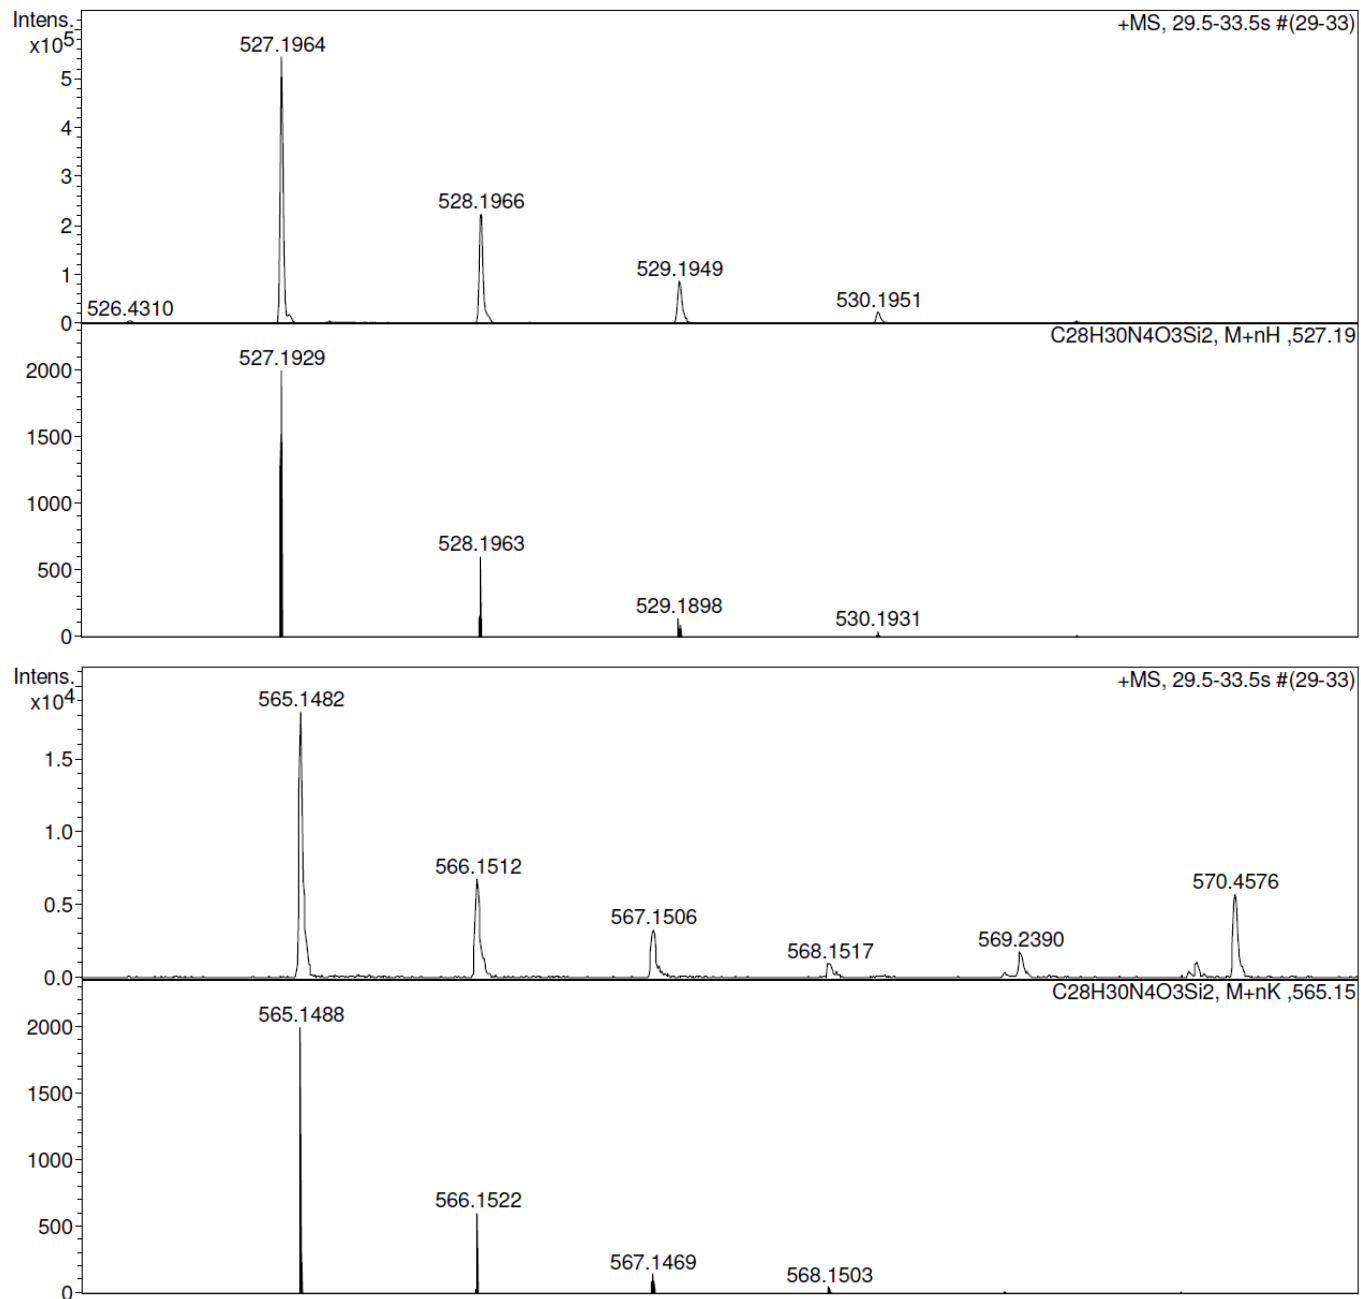

S111

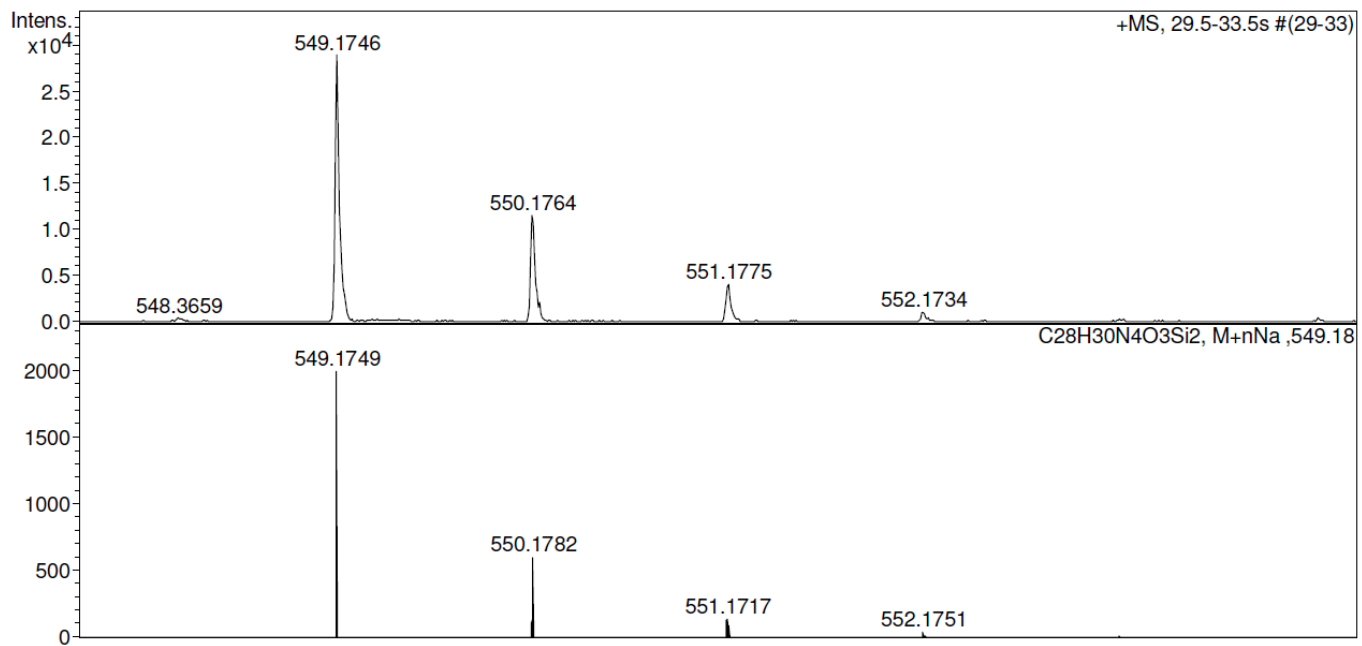

Supplement: d2nj03872b3.pdf [file d2nj03872b3.pdf]
